# Supplementary material for: Identification of DUSP7 as an RNA Marker for Prognostic Stratification in Acute Myeloid Leukemia: Evidence from Large Population Cohorts
Source: Hindawi journal article supplement (doi:10.1155/2023/4348290), 2023-07-26
Supplement: f1 [file 4348290.f1.pdf]

## Supplementary file 1. Results of univariate Cox regression analysis in GSE71014

| id       | HR       | HR.95L   | HR.95H   | pvalue   |
|----------|----------|----------|----------|----------|
| TSPAN6   | 7.097344 | 0.167525 | 300.6845 | 0.305239 |
| DPM1     | 0.57391  | 0.208284 | 1.581361 | 0.282929 |
| SCYL3    | 0.49131  | 0.104466 | 2.310668 | 0.368288 |
| FGR      | 1.262221 | 0.919053 | 1.733526 | 0.150284 |
| CFH      | 0.986194 | 0.493514 | 1.970721 | 0.968605 |
| FUCA2    | 0.325279 | 0.09202  | 1.149826 | 0.081289 |
| GCLC     | 0.758665 | 0.312005 | 1.844754 | 0.542367 |
| NFYA     | 0.221881 | 0.054931 | 0.896234 | 0.034535 |
| LAS1L    | 0.219516 | 0.082756 | 0.58228  | 0.002315 |
| ENPP4    | 0.831154 | 0.521955 | 1.32352  | 0.435907 |
| SEMA3F   | 1.551246 | 0.248133 | 9.69789  | 0.638706 |
| ANKIB1   | 0.541933 | 0.2542   | 1.155352 | 0.112719 |
| CYP51A1  | 1.237117 | 0.757943 | 2.019227 | 0.394637 |
| KRIT1    | 0.214453 | 0.053568 | 0.858539 | 0.029595 |
| RAD52    | 0.319515 | 0.033283 | 3.067331 | 0.322805 |
| BAD      | 2.444464 | 0.903819 | 6.611289 | 0.07828  |
| LAP3     | 0.73364  | 0.372257 | 1.445851 | 0.370887 |
| CD99     | 1.123164 | 0.792395 | 1.592006 | 0.514026 |
| HS3ST1   | 2.926541 | 1.063252 | 8.055144 | 0.037646 |
| MAD1L1   | 2.434279 | 1.091644 | 5.42825  | 0.029686 |
| LASP1    | 0.844994 | 0.296303 | 2.409746 | 0.752757 |
| SNX11    | 1.764561 | 0.400161 | 7.781057 | 0.453163 |
| TMEM176, | 1.27215  | 1.024163 | 1.580185 | 0.029572 |
| M6PR     | 1.034755 | 0.59392  | 1.802798 | 0.903998 |
| KLHL13   | 0.576031 | 0.265477 | 1.249867 | 0.162823 |
| ICA1     | 0.969018 | 0.439057 | 2.138668 | 0.937893 |
| DBNDD1   | 0.660576 | 0.21371  | 2.041839 | 0.471432 |
| ALS2     | 0.832316 | 0.55786  | 1.241798 | 0.368592 |
| CASP10   | 0.370726 | 0.041636 | 3.300935 | 0.373742 |
| CFLAR    | 0.859712 | 0.486292 | 1.51988  | 0.603096 |
| TFPI     | 0.890056 | 0.598323 | 1.324034 | 0.565436 |
| RBM5     | 0.641775 | 0.357513 | 1.152059 | 0.137339 |
| MTMR7    | 0.169782 | 0.010477 | 2.751219 | 0.212103 |
| SLC7A2   | 0.80374  | 0.196246 | 3.291787 | 0.761345 |
| ARF5     | 3.145547 | 1.548859 | 6.388227 | 0.001523 |
| SARM1    | 2.102371 | 0.873436 | 5.060434 | 0.097313 |
| POLDIP2  | 0.492171 | 0.135953 | 1.781743 | 0.280131 |
| PLXND1   | 1.043601 | 0.538259 | 2.023383 | 0.899466 |
| AK2      | 0.793881 | 0.468306 | 1.3458   | 0.391372 |
| CD38     | 0.516299 | 0.339798 | 0.784481 | 0.001954 |
| FKBP4    | 0.678983 | 0.416392 | 1.107173 | 0.120693 |
| RBM6     | 0.26708  | 0.127341 | 0.560162 | 0.000477 |
| CAMKK1   | 0.038841 | 0.001262 | 1.195754 | 0.063209 |
| RECQL    | 1.26524  | 0.531032 | 3.014567 | 0.595344 |
| HSPB6    | 0.196621 | 0.034486 | 1.12104  | 0.067053 |
| NDUFAB1  | 1.200758 | 0.591618 | 2.437076 | 0.612449 |
| PKD4     | 1.468117 | 1.003366 | 2.148135 | 0.048011 |
| SLC22A16 | 0.950554 | 0.629036 | 1.436411 | 0.80976  |
| ZMYND10  | 0.336067 | 0.022324 | 5.059196 | 0.4306   |
| SLC25A13 | 0.511975 | 0.256515 | 1.021844 | 0.057607 |
| ST7      | 0.514442 | 0.323492 | 0.818106 | 0.004982 |
| CDC27    | 0.234825 | 0.015786 | 3.49306  | 0.292843 |
| SLC4A1   | 1.012979 | 0.85187  | 1.204557 | 0.883993 |
| HCCS     | 2.641868 | 1.096242 | 6.36672  | 0.03041  |
| DVL2     | 1.695981 | 0.697489 | 4.123868 | 0.243912 |
| UPF1     | 1.952006 | 0.835059 | 4.562944 | 0.122614 |

|          |          |          |          |          |
|----------|----------|----------|----------|----------|
| SKAP2    | 0.88396  | 0.606955 | 1.287386 | 0.52021  |
| SLC25A5  | 0.233073 | 0.04291  | 1.265961 | 0.091638 |
| HOXA11   | 0.999135 | 0.594892 | 1.678071 | 0.997391 |
| POLR2J   | 3.1398   | 1.125527 | 8.75887  | 0.028824 |
| DHX33    | 0.383893 | 0.173033 | 0.85171  | 0.018536 |
| THSD7A   | 3.539326 | 0.444191 | 28.20144 | 0.232629 |
| LIG3     | 0.207809 | 0.024426 | 1.768004 | 0.15035  |
| RPAP3    | 0.356507 | 0.091161 | 1.3942   | 0.138248 |
| ACSM3    | 0.502934 | 0.2826   | 0.895054 | 0.019442 |
| CIAPIN1  | 0.817829 | 0.331039 | 2.020441 | 0.662976 |
| SPPL2B   | 1.913689 | 0.562557 | 6.509924 | 0.29879  |
| COPZ2    | 2.233774 | 0.607724 | 8.210553 | 0.226244 |
| PRKAR2B  | 1.404668 | 0.13394  | 14.73121 | 0.776883 |
| MSL3     | 0.997537 | 0.148913 | 6.682319 | 0.997973 |
| CREBBP   | 1.656266 | 0.747335 | 3.670668 | 0.213988 |
| MPO      | 0.936254 | 0.782503 | 1.120215 | 0.471733 |
| WDR54    | 1.882431 | 1.080328 | 3.280064 | 0.02557  |
| CROT     | 0.309545 | 0.1198   | 0.799815 | 0.015471 |
| ABCB4    | 0.294976 | 0.029554 | 2.944116 | 0.29831  |
| RHBDD2   | 1.34633  | 0.878164 | 2.064087 | 0.172556 |
| IBTK     | 0.59891  | 0.312687 | 1.147131 | 0.122102 |
| ZNF195   | 0.892655 | 0.384291 | 2.073515 | 0.791721 |
| MYCBP2   | 0.604    | 0.299447 | 1.2183   | 0.159016 |
| FBXL3    | 1.984472 | 0.57889  | 6.802898 | 0.275573 |
| ITGAL    | 1.271821 | 0.905292 | 1.786747 | 0.165652 |
| PDK2     | 6.898315 | 1.897836 | 25.07421 | 0.003357 |
| ITGA3    | 4.030758 | 0.694098 | 23.40737 | 0.120393 |
| ZFX      | 0.647243 | 0.286244 | 1.463521 | 0.295991 |
| LAMP2    | 0.726298 | 0.419339 | 1.257955 | 0.253828 |
| ITGA2B   | 1.002271 | 0.751115 | 1.337408 | 0.987704 |
| GDE1     | 0.59259  | 0.237951 | 1.475781 | 0.261026 |
| CRLF1    | 1.287381 | 0.212956 | 7.782588 | 0.783186 |
| OSBPL7   | 0.543575 | 0.217448 | 1.358823 | 0.19222  |
| TMEM98   | 1.941477 | 0.883762 | 4.265095 | 0.098486 |
| YBX2     | 0.566388 | 0.075765 | 4.23409  | 0.579667 |
| MAP3K14  | 4.868308 | 2.298632 | 10.31067 | 3.57E-05 |
| TMEM132  | 0.037625 | 0.001368 | 1.035189 | 0.052439 |
| AP2B1    | 1.005665 | 0.468468 | 2.15887  | 0.988437 |
| ZNF263   | 0.400189 | 0.188824 | 0.848152 | 0.016861 |
| SPATA20  | 1.333402 | 0.648634 | 2.741081 | 0.43387  |
| TNFRSF12 | 1.783539 | 0.825668 | 3.852656 | 0.140896 |
| MAP3K9   | 0.311552 | 0.028915 | 3.356895 | 0.3363   |
| RALA     | 0.950586 | 0.585495 | 1.543333 | 0.837609 |
| BAIAP2L1 | 1.320834 | 0.369541 | 4.720992 | 0.668526 |
| AGK      | 0.348166 | 0.108442 | 1.117825 | 0.07626  |
| ALDH3B1  | 1.237204 | 0.703262 | 2.176532 | 0.460187 |
| TTC22    | 0.778697 | 0.083553 | 7.257293 | 0.826157 |
| PHTF2    | 1.698394 | 0.34949  | 8.253582 | 0.511398 |
| FARP2    | 3.010707 | 0.827009 | 10.9604  | 0.094554 |
| GGCT     | 0.474371 | 0.19132  | 1.176189 | 0.107465 |
| DBF4     | 0.482315 | 0.05694  | 4.085464 | 0.503573 |
| TBXA2R   | 1.712643 | 0.471414 | 6.222019 | 0.413681 |
| IFRD1    | 0.411861 | 0.132582 | 1.279429 | 0.12506  |
| COX10    | 0.663222 | 0.264295 | 1.664286 | 0.381684 |
| GTF2IRD1 | 2.010213 | 0.279139 | 14.47649 | 0.488199 |
| PAF1     | 0.329365 | 0.12858  | 0.843686 | 0.02066  |
| VPS41    | 0.198291 | 0.049437 | 0.795343 | 0.022427 |
| ELAC2    | 0.684693 | 0.265096 | 1.768436 | 0.433979 |

|          |          |          |          |          |
|----------|----------|----------|----------|----------|
| ARSD     | 1.194477 | 0.522163 | 2.732434 | 0.673815 |
| PNPLA4   | 0.233431 | 0.041989 | 1.297726 | 0.096471 |
| ADIPOR2  | 0.588755 | 0.305352 | 1.135191 | 0.11378  |
| CDKL3    | 1.984862 | 0.326596 | 12.06284 | 0.456527 |
| PRSS21   | 1.063362 | 0.805992 | 1.402916 | 0.663915 |
| MARK4    | 0.61521  | 0.104806 | 3.611281 | 0.590595 |
| PROM1    | 0.955019 | 0.82956  | 1.099452 | 0.52185  |
| CCDC124  | 1.239369 | 0.530766 | 2.893997 | 0.619905 |
| CEACAM2  | 0.663626 | 0.160462 | 2.74457  | 0.571332 |
| PAFAH1B1 | 0.909468 | 0.464847 | 1.779366 | 0.781687 |
| KIAA0100 | 0.871691 | 0.366153 | 2.07521  | 0.756337 |
| GAS7     | 1.168725 | 0.310796 | 4.394902 | 0.817539 |
| TRAPPC6A | 0.835836 | 0.479352 | 1.457431 | 0.527298 |
| MATK     | 0.707489 | 0.374508 | 1.336529 | 0.286339 |
| CD79B    | 1.857035 | 1.303406 | 2.645823 | 0.00061  |
| SCN4A    | 1.008511 | 0.065509 | 15.52595 | 0.995152 |
| ST7L     | 0.425286 | 0.091558 | 1.975452 | 0.275213 |
| TKTL1    | 1.145879 | 0.576793 | 2.276447 | 0.697421 |
| RPUSD1   | 1.369395 | 0.785391 | 2.387656 | 0.267732 |
| RHBDF1   | 1.146615 | 0.878055 | 1.497315 | 0.314976 |
| LUC7L    | 0.32082  | 0.056134 | 1.833586 | 0.20115  |
| CACNA2D  | 0.146989 | 0.012901 | 1.674746 | 0.12245  |
| BAIAP3   | 15.11735 | 1.456463 | 156.9104 | 0.02291  |
| PIGQ     | 0.761885 | 0.466073 | 1.245445 | 0.278097 |
| TEAD3    | 0.714201 | 0.145544 | 3.504655 | 0.678338 |
| DNAJC11  | 0.331854 | 0.112059 | 0.982756 | 0.046441 |
| MYLIP    | 0.874263 | 0.588805 | 1.298114 | 0.505238 |
| E2F2     | 0.986782 | 0.760901 | 1.279718 | 0.920084 |
| PSMB1    | 0.507404 | 0.196329 | 1.311361 | 0.161382 |
| SYN1     | 29.28004 | 0.568163 | 1508.935 | 0.093173 |
| JARID2   | 0.636039 | 0.341465 | 1.184736 | 0.153923 |
| CDKL5    | 0.00782  | 0.000108 | 0.566133 | 0.026394 |
| CAMK1G   | 1.186546 | 0.80156  | 1.756438 | 0.392723 |
| NADK     | 1.497565 | 0.906179 | 2.474899 | 0.11512  |
| DLEC1    | 2.739815 | 0.075151 | 99.88718 | 0.582788 |
| CYTH3    | 1.858085 | 0.61664  | 5.598858 | 0.270949 |
| ADAM22   | 0.151326 | 0.001588 | 14.42312 | 0.416712 |
| SYPL1    | 0.398664 | 0.115131 | 1.380454 | 0.146726 |
| CYB561   | 2.160519 | 0.730948 | 6.386015 | 0.163571 |
| SPAG9    | 0.625827 | 0.181466 | 2.158309 | 0.458088 |
| CELSR3   | 0.584488 | 0.328029 | 1.041453 | 0.068433 |
| AASS     | 1.829339 | 0.32116  | 10.41998 | 0.496255 |
| PLEKHG6  | 2.039097 | 0.209532 | 19.84387 | 0.53939  |
| SS18L2   | 0.664486 | 0.190678 | 2.315641 | 0.521066 |
| MPND     | 0.830679 | 0.419743 | 1.643929 | 0.594266 |
| MGST1    | 0.710987 | 0.445431 | 1.134864 | 0.152804 |
| CRY1     | 0.987713 | 0.597492 | 1.632787 | 0.961553 |
| PGLYRP1  | 1.017504 | 0.86683  | 1.19437  | 0.831938 |
| NFIX     | 1.501331 | 1.116389 | 2.019006 | 0.00718  |
| ST3GAL1  | 1.643576 | 0.714571 | 3.780369 | 0.242336 |
| MMP25    | 1.009993 | 0.619559 | 1.646474 | 0.968188 |
| IL32     | 1.094136 | 0.782316 | 1.530241 | 0.599147 |
| PKD1     | 1.321748 | 0.634267 | 2.754387 | 0.456492 |
| MED24    | 0.96065  | 0.489732 | 1.884395 | 0.907032 |
| RHOBTB2  | 1.405441 | 0.463578 | 4.260912 | 0.547547 |
| HEATR5B  | 1.036973 | 0.574907 | 1.870411 | 0.903978 |
| SEC62    | 1.366162 | 0.580584 | 3.214689 | 0.474844 |
| RPS20    | 0.634312 | 0.082309 | 4.888312 | 0.662174 |

|          |          |          |          |          |
|----------|----------|----------|----------|----------|
| CSDE1    | 0.254682 | 0.103636 | 0.625874 | 0.002869 |
| UBE3C    | 0.717114 | 0.322444 | 1.594859 | 0.414862 |
| REV3L    | 0.337845 | 0.102293 | 1.115812 | 0.075044 |
| MASP2    | 1.952883 | 0.052364 | 72.83224 | 0.716982 |
| FAM76A   | 1.184643 | 0.426258 | 3.292325 | 0.745255 |
| TRAF3IP3 | 1.535161 | 0.692131 | 3.405022 | 0.291609 |
| POMT2    | 0.558445 | 0.227929 | 1.368235 | 0.202578 |
| VTA1     | 0.30444  | 0.137358 | 0.67476  | 0.003403 |
| MLXIPL   | 2.307646 | 0.485618 | 10.96588 | 0.292985 |
| BAZ1B    | 1.013436 | 0.227381 | 4.516885 | 0.986035 |
| RANBP9   | 0.545788 | 0.249515 | 1.193854 | 0.12945  |
| ETV7     | 0.667257 | 0.097034 | 4.588397 | 0.680879 |
| DYRK4    | 2.161311 | 0.846894 | 5.515763 | 0.106893 |
| ZNF207   | 0.46678  | 0.215083 | 1.013022 | 0.05395  |
| UQCRC1   | 1.942278 | 0.981908 | 3.841953 | 0.056455 |
| STARD3NL | 0.528276 | 0.230265 | 1.211975 | 0.132017 |
| CD9      | 1.54653  | 1.160466 | 2.061031 | 0.002924 |
| NCAPD2   | 0.745959 | 0.406852 | 1.367709 | 0.343351 |
| IFFO1    | 0.693302 | 0.210662 | 2.2817   | 0.546724 |
| GIPR     | 0.013411 | 0.000739 | 0.243528 | 0.003558 |
| PHF7     | 0.010105 | 0.000484 | 0.211033 | 0.003043 |
| SEMA3G   | 0.033349 | 0.001673 | 0.664706 | 0.025916 |
| NISCH    | 1.344605 | 0.673616 | 2.683968 | 0.401118 |
| STAB1    | 1.418066 | 1.098787 | 1.83012  | 0.007279 |
| FUZ      | 2.091805 | 0.929091 | 4.709603 | 0.074693 |
| SLC6A13  | 0.768531 | 0.141154 | 4.184361 | 0.76075  |
| IDS      | 0.82724  | 0.464755 | 1.472444 | 0.519116 |
| PRSS3    | 1.114588 | 0.663866 | 1.87132  | 0.68155  |
| ZNF200   | 1.685714 | 0.346041 | 8.211843 | 0.518032 |
| CD4      | 1.51679  | 1.123593 | 2.047585 | 0.006506 |
| LRRRC23  | 1.085696 | 0.384129 | 3.068592 | 0.876741 |
| BTK      | 0.800968 | 0.408149 | 1.571854 | 0.518802 |
| HFE      | 0.922437 | 0.005135 | 165.701  | 0.975681 |
| SCMH1    | 0.207203 | 0.075134 | 0.571423 | 0.002356 |
| FYN      | 1.198033 | 0.710315 | 2.020632 | 0.498113 |
| HIVEP2   | 0.719501 | 0.242619 | 2.133719 | 0.55282  |
| LYPLA2   | 2.852575 | 1.22553  | 6.639728 | 0.015025 |
| CLCN6    | 1.058114 | 0.236201 | 4.740057 | 0.941145 |
| MRC2     | 0.580558 | 0.137196 | 2.456698 | 0.460037 |
| TSPAN9   | 1.219777 | 0.93147  | 1.597319 | 0.148745 |
| BTBD7    | 0.485626 | 0.100489 | 2.34685  | 0.368842 |
| APBA3    | 1.217603 | 0.558889 | 2.652683 | 0.620206 |
| MKS1     | 0.377566 | 0.114691 | 1.242955 | 0.109111 |
| ABHD5    | 0.905438 | 0.632966 | 1.295201 | 0.586552 |
| AKAP8L   | 1.18016  | 0.587161 | 2.372056 | 0.641882 |
| MBTD1    | 0.943495 | 0.477432 | 1.86452  | 0.867086 |
| UTP18    | 0.446834 | 0.188145 | 1.061204 | 0.067947 |
| RNF216   | 0.867021 | 0.198848 | 3.780404 | 0.849366 |
| TTC19    | 0.68761  | 0.355904 | 1.328468 | 0.264995 |
| PTBP1    | 1.050708 | 0.401054 | 2.752711 | 0.91982  |
| DPF1     | 3.255475 | 0.72579  | 14.60218 | 0.123213 |
| LARS2    | 0.479548 | 0.184715 | 1.244981 | 0.131094 |
| PIK3C2A  | 0.878782 | 0.231306 | 3.338689 | 0.849513 |
| PLAUR    | 1.214456 | 0.925233 | 1.594088 | 0.161507 |
| ANLN     | 0.638876 | 0.359105 | 1.13661  | 0.127429 |
| WIZ      | 1.429746 | 0.216009 | 9.463391 | 0.710829 |
| RABGAP1  | 1.731309 | 0.916753 | 3.269617 | 0.090641 |
| QPCTL    | 0.682988 | 0.185591 | 2.51345  | 0.566276 |

|          |          |          |          |          |
|----------|----------|----------|----------|----------|
| PPP5C    | 0.391789 | 0.029609 | 5.184115 | 0.477013 |
| CEP68    | 0.896547 | 0.459733 | 1.748395 | 0.748618 |
| MAP4K3   | 0.848304 | 0.378176 | 1.902869 | 0.6898   |
| ZBTB32   | 3.200424 | 0.607967 | 16.84749 | 0.169836 |
| TYROBP   | 1.560008 | 0.95232  | 2.555469 | 0.077404 |
| TMEM159  | 0.660575 | 0.197489 | 2.209536 | 0.5009   |
| BRCA1    | 0.192213 | 0.044622 | 0.827974 | 0.026876 |
| ERCC1    | 2.215896 | 0.784387 | 6.25991  | 0.133192 |
| CD22     | 1.829425 | 0.51503  | 6.498257 | 0.350325 |
| SEMA3B   | 0.205393 | 0.009522 | 4.430203 | 0.312448 |
| MBTPS2   | 0.381518 | 0.053384 | 2.726593 | 0.336893 |
| PRICKLE3 | 1.253875 | 0.272214 | 5.775606 | 0.77158  |
| LTF      | 0.943535 | 0.779866 | 1.141553 | 0.549872 |
| EXTL3    | 2.504054 | 1.083032 | 5.789571 | 0.031834 |
| ELOVL5   | 0.680522 | 0.389448 | 1.189142 | 0.176494 |
| ALOX5    | 1.64896  | 0.873605 | 3.112469 | 0.122815 |
| CALCOCO  | 1.363469 | 0.477968 | 3.889477 | 0.562126 |
| UBR7     | 0.122569 | 0.02157  | 0.696488 | 0.017884 |
| MAP4K5   | 0.334987 | 0.156549 | 0.716815 | 0.004836 |
| EHD3     | 0.69943  | 0.275003 | 1.778899 | 0.452898 |
| PSMC4    | 0.822739 | 0.306571 | 2.207968 | 0.698472 |
| MAN2B2   | 1.505557 | 0.602567 | 3.761739 | 0.381164 |
| SLC25A39 | 1.051893 | 0.75126  | 1.472829 | 0.768309 |
| MVP      | 2.171849 | 1.358058 | 3.473289 | 0.001206 |
| NUB1     | 0.517102 | 0.119904 | 2.230081 | 0.37647  |
| PGM3     | 1.732059 | 0.333    | 9.009082 | 0.513802 |
| RWDD2A   | 3.128947 | 1.303926 | 7.508328 | 0.010644 |
| CLK1     | 0.85338  | 0.499201 | 1.458846 | 0.562218 |
| POLR3B   | 0.88675  | 0.364513 | 2.157195 | 0.791021 |
| ANGEL1   | 0.810678 | 0.327235 | 2.00834  | 0.650226 |
| RNF14    | 1.784128 | 0.831022 | 3.830358 | 0.137509 |
| DNASE1L1 | 4.032052 | 0.58997  | 27.5564  | 0.155071 |
| DDX11    | 0.213078 | 0.018629 | 2.437229 | 0.213693 |
| HEBP1    | 0.783461 | 0.360577 | 1.702299 | 0.537662 |
| GPRC5A   | 1.95201  | 0.134898 | 28.24618 | 0.623707 |
| MAMLD1   | 0.622036 | 0.214582 | 1.80317  | 0.381961 |
| CD6      | 1.052619 | 0.795893 | 1.392156 | 0.719212 |
| TACC3    | 1.351799 | 0.577644 | 3.163468 | 0.487135 |
| POLA2    | 0.418776 | 0.203886 | 0.860155 | 0.01778  |
| ZC3H3    | 1.045578 | 0.462516 | 2.363668 | 0.91471  |
| CAPN1    | 2.158934 | 0.816132 | 5.71108  | 0.120997 |
| MDH1     | 0.392424 | 0.171206 | 0.89948  | 0.027085 |
| SLC30A9  | 0.524086 | 0.253916 | 1.081723 | 0.080551 |
| MTMR11   | 1.581615 | 1.027633 | 2.434242 | 0.037173 |
| COX15    | 0.296063 | 0.077289 | 1.134104 | 0.075681 |
| CCDC88C  | 1.864679 | 0.898536 | 3.869659 | 0.094378 |
| YAF2     | 0.492895 | 0.076142 | 3.190672 | 0.457838 |
| ZMYND11  | 0.222592 | 0.062184 | 0.79678  | 0.020937 |
| WAS      | 1.77737  | 0.934283 | 3.38125  | 0.079637 |
| DPEP1    | 0.714696 | 0.067138 | 7.608082 | 0.780737 |
| BID      | 1.506899 | 0.491487 | 4.620148 | 0.473163 |
| MATR3    | 0.407402 | 0.148139 | 1.120411 | 0.081913 |
| NPC1L1   | 0.921575 | 0.060401 | 14.06098 | 0.953159 |
| XYLT2    | 0.72123  | 0.263846 | 1.971498 | 0.524157 |
| NUDCD3   | 0.83114  | 0.382226 | 1.807292 | 0.640731 |
| GLT8D1   | 0.350874 | 0.093205 | 1.320875 | 0.121502 |
| ATP2C1   | 0.386978 | 0.194433 | 0.770197 | 0.006861 |
| SLC38A5  | 1.08847  | 0.614158 | 1.92909  | 0.77156  |

|          |          |          |          |          |
|----------|----------|----------|----------|----------|
| RALBP1   | 0.810526 | 0.347544 | 1.890269 | 0.626806 |
| RUFY3    | 0.664875 | 0.153669 | 2.8767   | 0.584977 |
| SLC11A1  | 1.164147 | 0.789792 | 1.715941 | 0.442597 |
| WWTR1    | 0.361396 | 0.024671 | 5.294017 | 0.457406 |
| AGPS     | 0.543149 | 0.280232 | 1.052738 | 0.070646 |
| TTC27    | 0.833723 | 0.587688 | 1.182762 | 0.308099 |
| ZNF582   | 0.384019 | 0.036958 | 3.990184 | 0.422946 |
| VSIG2    | 0.581485 | 0.072736 | 4.648678 | 0.609219 |
| PHLDB1   | 2.048608 | 0.781601 | 5.369484 | 0.144634 |
| MARCO    | 1.518639 | 1.075184 | 2.144996 | 0.01772  |
| PRDM11   | 0.042033 | 0.001443 | 1.223997 | 0.065408 |
| CD74     | 1.188955 | 0.924246 | 1.529479 | 0.17801  |
| HGF      | 0.501808 | 0.26964  | 0.933879 | 0.029568 |
| ZRANB1   | 0.71654  | 0.314385 | 1.633123 | 0.427769 |
| NCDN     | 0.943159 | 0.205999 | 4.318229 | 0.939903 |
| ZFP64    | 0.586858 | 0.03727  | 9.240772 | 0.704727 |
| MNAT1    | 0.340666 | 0.145832 | 0.795802 | 0.012861 |
| SAMD4A   | 1.345395 | 0.820943 | 2.204889 | 0.239138 |
| RUNX3    | 0.846484 | 0.457447 | 1.56638  | 0.595576 |
| PLEKHB1  | 0.581576 | 0.184642 | 1.83182  | 0.354489 |
| SERPINB1 | 0.644388 | 0.37733  | 1.100458 | 0.107531 |
| SPAST    | 0.819146 | 0.345444 | 1.942426 | 0.650661 |
| OSBPL5   | 0.701165 | 0.426961 | 1.15147  | 0.160707 |
| AQR      | 0.480923 | 0.128778 | 1.796012 | 0.276187 |
| FHL1     | 1.664226 | 1.159872 | 2.387893 | 0.005691 |
| NLRP2    | 1.56196  | 0.982002 | 2.484433 | 0.059665 |
| SLC45A4  | 2.524799 | 0.752238 | 8.474194 | 0.13384  |
| RNF10    | 0.752886 | 0.443209 | 1.278938 | 0.293758 |
| ZNF839   | 1.374597 | 0.48705  | 3.879515 | 0.54783  |
| ZDHHC6   | 0.401396 | 0.185885 | 0.866764 | 0.020125 |
| GRAMD1B  | 2.255639 | 0.897483 | 5.669082 | 0.083642 |
| RNH1     | 1.988806 | 1.230041 | 3.215625 | 0.005039 |
| NDUFS1   | 0.865991 | 0.257731 | 2.909776 | 0.816007 |
| RB1CC1   | 0.906666 | 0.451203 | 1.821895 | 0.783175 |
| ERP44    | 3.508243 | 0.56172  | 21.91085 | 0.17931  |
| ALAS1    | 0.843816 | 0.184121 | 3.86717  | 0.826932 |
| BIRC3    | 0.777809 | 0.362928 | 1.666963 | 0.518231 |
| AKAP11   | 0.734345 | 0.207176 | 2.602919 | 0.632468 |
| GLRX2    | 2.468742 | 0.783347 | 7.780318 | 0.122821 |
| SNAPC1   | 0.764625 | 0.31807  | 1.838118 | 0.548712 |
| DERA     | 0.408162 | 0.213505 | 0.780292 | 0.006722 |
| STRAP    | 0.330333 | 0.157001 | 0.695026 | 0.003517 |
| ABCC2    | 0.065268 | 0.008544 | 0.498597 | 0.008518 |
| DEF6     | 0.733735 | 0.321589 | 1.674085 | 0.461943 |
| PLEKHO1  | 1.397037 | 0.729966 | 2.673701 | 0.312703 |
| GCLM     | 0.972086 | 0.456542 | 2.069801 | 0.941471 |
| UBR2     | 0.684293 | 0.335523 | 1.395604 | 0.296813 |
| EHD2     | 2.726793 | 1.45761  | 5.10109  | 0.001695 |
| DEPDC1   | 0.020999 | 0.000507 | 0.870555 | 0.042062 |
| CCDC28A  | 0.509622 | 0.184572 | 1.407121 | 0.19331  |
| RRAGD    | 1.035378 | 0.678242 | 1.580566 | 0.872029 |
| HSF2     | 0.504186 | 0.231596 | 1.097614 | 0.084472 |
| PHF20    | 1.168809 | 0.436522 | 3.129543 | 0.756248 |
| NR1H3    | 1.782245 | 1.157171 | 2.74497  | 0.008731 |
| TYMP     | 1.350398 | 1.08242  | 1.68472  | 0.007774 |
| NCAPH2   | 1.67614  | 0.338668 | 8.295583 | 0.526735 |
| TOMM34   | 0.398029 | 0.179441 | 0.882892 | 0.023428 |
| SEC63    | 0.373188 | 0.113896 | 1.22278  | 0.103566 |

|          |          |          |          |          |
|----------|----------|----------|----------|----------|
| KPNA6    | 1.195238 | 0.581303 | 2.457573 | 0.627727 |
| VIM      | 1.898055 | 1.008078 | 3.573743 | 0.047157 |
| FAS      | 0.923563 | 0.406395 | 2.098868 | 0.849428 |
| RNASET2  | 0.643722 | 0.314244 | 1.31865  | 0.228613 |
| CD44     | 0.973442 | 0.589932 | 1.606269 | 0.916107 |
| AGPAT4   | 3.021178 | 1.235157 | 7.389762 | 0.015403 |
| SLAMF7   | 2.615552 | 0.848372 | 8.063808 | 0.094186 |
| BTN3A1   | 0.963799 | 0.30785  | 3.017405 | 0.949509 |
| MIPEP    | 0.510796 | 0.266365 | 0.979532 | 0.043154 |
| PRKCH    | 1.207464 | 0.901891 | 1.616571 | 0.205393 |
| IFNGR1   | 1.222898 | 0.863278 | 1.732327 | 0.257415 |
| B4GALT7  | 0.710418 | 0.286676 | 1.760505 | 0.460262 |
| SH2D2A   | 1.131522 | 0.302187 | 4.236919 | 0.854459 |
| VRK2     | 0.800882 | 0.33758  | 1.900028 | 0.614438 |
| TNFRSF1B | 1.210557 | 0.965231 | 1.518236 | 0.098188 |
| VEZT     | 0.392681 | 0.118609 | 1.30006  | 0.125929 |
| POU2F2   | 1.572074 | 0.978211 | 2.526465 | 0.061629 |
| BRD9     | 0.346615 | 0.051472 | 2.33412  | 0.276212 |
| SNX1     | 0.644758 | 0.237203 | 1.752561 | 0.389665 |
| TBPL1    | 0.765726 | 0.367413 | 1.595853 | 0.476191 |
| ARNTL2   | 0.567444 | 0.060564 | 5.316588 | 0.619652 |
| BCLAF1   | 0.631264 | 0.302974 | 1.315275 | 0.219346 |
| SLC39A9  | 0.733594 | 0.141383 | 3.806407 | 0.71229  |
| ANK1     | 0.853452 | 0.544928 | 1.336655 | 0.488754 |
| TFB1M    | 0.484048 | 0.193382 | 1.211608 | 0.121158 |
| RABEP1   | 0.804148 | 0.488137 | 1.324739 | 0.392095 |
| HMGB3    | 0.635879 | 0.341929 | 1.182533 | 0.15263  |
| NUP160   | 0.833703 | 0.443953 | 1.565617 | 0.571603 |
| BAK1     | 2.267952 | 0.990061 | 5.195241 | 0.052826 |
| IKZF2    | 0.100678 | 0.007398 | 1.370143 | 0.084789 |
| GRN      | 1.256457 | 0.959833 | 1.644749 | 0.096596 |
| FAM13B   | 0.533361 | 0.277481 | 1.0252   | 0.059387 |
| CENPQ    | 1.110682 | 0.647474 | 1.905275 | 0.703012 |
| RANBP3   | 1.527264 | 0.294007 | 7.933595 | 0.614433 |
| ARID4A   | 0.480972 | 0.161272 | 1.434438 | 0.18923  |
| PNPLA6   | 1.732621 | 1.027305 | 2.922184 | 0.039305 |
| IFT88    | 0.951982 | 0.125162 | 7.240755 | 0.962086 |
| ALG1     | 1.289408 | 0.625244 | 2.65908  | 0.491263 |
| ZCCHC8   | 0.945408 | 0.486289 | 1.837993 | 0.868546 |
| ABCF2    | 0.301787 | 0.056428 | 1.614008 | 0.161398 |
| CHPF2    | 0.928858 | 0.450231 | 1.916301 | 0.841692 |
| LRRC7    | 0.751063 | 0.070884 | 7.958009 | 0.812116 |
| FUT8     | 0.244484 | 0.05285  | 1.130972 | 0.071471 |
| UBA6     | 0.657319 | 0.367067 | 1.177082 | 0.158098 |
| GAB2     | 1.057023 | 0.354779 | 3.149276 | 0.920693 |
| ATP6V0A1 | 1.083064 | 0.751344 | 1.56124  | 0.668889 |
| PIAS1    | 1.00616  | 0.507102 | 1.996359 | 0.985984 |
| SLC4A7   | 0.519092 | 0.251612 | 1.070923 | 0.075977 |
| APBA2    | 0.663887 | 0.190784 | 2.310182 | 0.51966  |
| MAP2K3   | 1.992996 | 0.763884 | 5.199784 | 0.158691 |
| TMSB10   | 2.079613 | 0.631614 | 6.847208 | 0.228495 |
| ASTE1    | 1.006715 | 0.333924 | 3.035047 | 0.990516 |
| RNF19A   | 0.409714 | 0.120275 | 1.395678 | 0.15362  |
| PEX3     | 0.148824 | 0.023467 | 0.943819 | 0.043247 |
| GABARAPI | 1.446281 | 0.788974 | 2.651202 | 0.232715 |
| SH3YL1   | 0.649831 | 0.283536 | 1.489335 | 0.308376 |
| FAM136A  | 0.404075 | 0.227861 | 0.716563 | 0.001934 |
| VCL      | 1.349291 | 0.576677 | 3.157027 | 0.489729 |

|         |          |          |          |          |
|---------|----------|----------|----------|----------|
| DEPDC1B | 0.890459 | 0.375458 | 2.111865 | 0.792312 |
| DAPK2   | 0.709681 | 0.204543 | 2.462309 | 0.588993 |
| NSMAF   | 0.599314 | 0.337282 | 1.064917 | 0.080894 |
| STAP1   | 0.72545  | 0.489036 | 1.076154 | 0.110668 |
| TIMP2   | 3.157841 | 1.489247 | 6.695972 | 0.002713 |
| RFC1    | 0.573861 | 0.202207 | 1.62861  | 0.296703 |
| TBC1D23 | 1.064387 | 0.483867 | 2.341388 | 0.876714 |
| CUL3    | 0.112579 | 0.009088 | 1.394586 | 0.088954 |
| MYOM2   | 1.049907 | 0.682595 | 1.614875 | 0.824549 |
| CYP46A1 | 2.410776 | 0.590756 | 9.837981 | 0.220054 |
| ZZZ3    | 0.555608 | 0.257865 | 1.197141 | 0.133475 |
| USP2    | 0.864063 | 0.012698 | 58.79892 | 0.9459   |
| TUBG2   | 1.171182 | 0.638237 | 2.149148 | 0.609936 |
| RPL26L1 | 0.995596 | 0.363119 | 2.729713 | 0.993156 |
| FLT4    | 7.377115 | 0.06407  | 849.4133 | 0.409231 |
| NSUN2   | 0.464703 | 0.234082 | 0.922537 | 0.028494 |
| FBXO42  | 3.194544 | 0.738062 | 13.82691 | 0.120264 |
| MFAP3   | 1.801436 | 0.577874 | 5.615703 | 0.310288 |
| MRI1    | 0.524571 | 0.202409 | 1.3595   | 0.184221 |
| METTL1  | 0.348108 | 0.087932 | 1.378098 | 0.132804 |
| AGA     | 0.387936 | 0.18765  | 0.801991 | 0.010605 |
| PI4K2B  | 0.607162 | 0.202374 | 1.821607 | 0.373408 |
| MAT2B   | 0.576952 | 0.22633  | 1.470746 | 0.249334 |
| EDC4    | 0.516482 | 0.216482 | 1.232219 | 0.136413 |
| TRIO    | 0.788706 | 0.22906  | 2.715688 | 0.706717 |
| VCAN    | 1.091844 | 0.945258 | 1.26116  | 0.232248 |
| CLEC16A | 0.896809 | 0.338367 | 2.376909 | 0.826649 |
| MSR1    | 1.550418 | 0.508157 | 4.730424 | 0.441    |
| CDH1    | 1.149057 | 0.838111 | 1.575366 | 0.388131 |
| ZFYVE16 | 1.224743 | 0.331223 | 4.528664 | 0.761241 |
| RAI14   | 2.052533 | 0.734958 | 5.732153 | 0.169974 |
| PNKP    | 1.065735 | 0.561085 | 2.02428  | 0.845784 |
| BEST2   | 0.72152  | 0.069894 | 7.448285 | 0.784051 |
| PHLPP2  | 1.409608 | 0.624311 | 3.182699 | 0.408686 |
| STAU2   | 0.459139 | 0.227668 | 0.92595  | 0.029635 |
| CTNS    | 2.905369 | 0.888372 | 9.501836 | 0.077702 |
| RTN4R   | 1.640798 | 1.11731  | 2.409553 | 0.011545 |
| PHF23   | 1.344387 | 0.710086 | 2.545291 | 0.36351  |
| INPP4A  | 0.107352 | 0.004482 | 2.5712   | 0.168457 |
| RAB27B  | 5.163294 | 0.84628  | 31.5021  | 0.075227 |
| PSMA4   | 0.763917 | 0.390008 | 1.4963   | 0.4324   |
| MYO16   | 0.31706  | 0.031906 | 3.150729 | 0.326878 |
| LSG1    | 0.712786 | 0.211443 | 2.402837 | 0.58502  |
| PARP3   | 1.932673 | 0.856556 | 4.360746 | 0.112506 |
| TNC     | 0.490428 | 0.108799 | 2.210684 | 0.353729 |
| THAP3   | 1.802508 | 0.313536 | 10.36256 | 0.509101 |
| TDP1    | 0.703288 | 0.241135 | 2.051194 | 0.519248 |
| AIFM2   | 1.735723 | 0.316416 | 9.521438 | 0.525458 |
| SPATA7  | 0.498556 | 0.166406 | 1.493682 | 0.213771 |
| MED17   | 0.474104 | 0.094797 | 2.371126 | 0.363492 |
| RETSAT  | 1.555086 | 0.761359 | 3.176283 | 0.225621 |
| CAPG    | 0.859218 | 0.585293 | 1.261343 | 0.438555 |
| AP2S1   | 1.523753 | 0.730412 | 3.178786 | 0.261597 |
| TG      | 0.459605 | 0.028523 | 7.405974 | 0.583596 |
| ADAM28  | 0.326892 | 0.107809 | 0.991184 | 0.048199 |
| DCUN1D1 | 1.288088 | 0.428907 | 3.868372 | 0.651839 |
| LCP2    | 1.019784 | 0.456449 | 2.278371 | 0.961903 |
| TRIT1   | 0.485014 | 0.194818 | 1.207482 | 0.119986 |



|          |          |          |          |          |
|----------|----------|----------|----------|----------|
| ADRB1    | 2.512268 | 1.267799 | 4.978306 | 0.008291 |
| CUL7     | 1.474194 | 0.365817 | 5.940801 | 0.585211 |
| CTNNA1   | 1.404399 | 0.978198 | 2.016296 | 0.065695 |
| PHKA2    | 0.564766 | 0.271706 | 1.173916 | 0.125905 |
| CNTLN    | 0.490424 | 0.138516 | 1.736375 | 0.269362 |
| HSPA5    | 0.776331 | 0.515135 | 1.169965 | 0.22634  |
| DSG2     | 0.907392 | 0.519822 | 1.583928 | 0.732424 |
| GEMIN8   | 0.654751 | 0.208641 | 2.054719 | 0.467966 |
| OFD1     | 0.638105 | 0.297622 | 1.368105 | 0.248292 |
| GPM6B    | 1.061235 | 0.473867 | 2.37666  | 0.885123 |
| PREX2    | 0.011561 | 9.08E-05 | 1.47208  | 0.071294 |
| WDR37    | 1.039647 | 0.447718 | 2.414166 | 0.927925 |
| YTHDC2   | 0.594703 | 0.227144 | 1.55704  | 0.289925 |
| CTPS2    | 0.676873 | 0.244856 | 1.87113  | 0.451889 |
| ATP6V1H  | 0.364424 | 0.06198  | 2.142715 | 0.264071 |
| POLR2B   | 0.883243 | 0.477495 | 1.633774 | 0.692369 |
| ARAP2    | 1.245499 | 0.398136 | 3.896324 | 0.705968 |
| TPR      | 0.358478 | 0.105924 | 1.213192 | 0.099091 |
| CP       | 1.147638 | 0.10792  | 12.20421 | 0.909106 |
| DTNBP1   | 0.694273 | 0.136815 | 3.523108 | 0.65971  |
| XK       | 0.813818 | 0.602562 | 1.099141 | 0.179106 |
| SCML1    | 0.604639 | 0.073428 | 4.978867 | 0.639986 |
| WWC3     | 2.070695 | 1.071295 | 4.002427 | 0.030404 |
| ARHGAP6  | 9.864663 | 0.449228 | 216.6196 | 0.146431 |
| FAM184B  | 0.104415 | 0.008684 | 1.255432 | 0.074965 |
| MAP4     | 0.052856 | 0.001223 | 2.283666 | 0.125969 |
| GOPC     | 0.540818 | 0.241632 | 1.210452 | 0.134829 |
| USP28    | 0.107723 | 0.010045 | 1.155231 | 0.065658 |
| HDAC9    | 0.224055 | 0.013405 | 3.744821 | 0.297853 |
| TSPAN17  | 1.003043 | 0.624581 | 1.610834 | 0.989969 |
| NOP16    | 0.662141 | 0.315385 | 1.390144 | 0.275943 |
| CC2D2A   | 10.48861 | 0.957761 | 114.8627 | 0.054277 |
| RRM2B    | 0.913413 | 0.343028 | 2.432231 | 0.856174 |
| ZNF800   | 0.550819 | 0.312604 | 0.970562 | 0.03908  |
| TNFRSF17 | 1.472149 | 0.877265 | 2.470432 | 0.143144 |
| SNX29    | 1.171253 | 0.508691 | 2.696792 | 0.710272 |
| MRPS10   | 0.429289 | 0.199485 | 0.923827 | 0.030573 |
| RSF1     | 1.086404 | 0.332069 | 3.554298 | 0.891002 |
| VPS13D   | 0.473495 | 0.025111 | 8.928101 | 0.617821 |
| FAM120A  | 0.806325 | 0.3676   | 1.768662 | 0.591171 |
| R3HDM1   | 0.787965 | 0.294516 | 2.108166 | 0.635073 |
| COL9A2   | 0.890207 | 0.616927 | 1.28454  | 0.534196 |
| KITLG    | 1.056686 | 0.128887 | 8.663276 | 0.959035 |
| ERCC8    | 0.021024 | 0.001137 | 0.388884 | 0.009475 |
| ADAMTS6  | 1.472182 | 0.307166 | 7.055855 | 0.628601 |
| H6PD     | 0.103545 | 0.014738 | 0.727461 | 0.022616 |
| VAMP3    | 1.109884 | 0.455226 | 2.706005 | 0.818652 |
| PER3     | 1.218145 | 0.606507 | 2.446596 | 0.579171 |
| UTS2     | 1.00549  | 0.614012 | 1.646564 | 0.982643 |
| TNFRSF9  | 0.92654  | 0.226393 | 3.791982 | 0.915488 |
| LTBP1    | 1.075702 | 0.313777 | 3.687764 | 0.907583 |
| RCN1     | 0.641212 | 0.243255 | 1.690213 | 0.368849 |
| ELN      | 0.425386 | 0.012009 | 15.06801 | 0.638626 |
| RFC2     | 0.384512 | 0.114904 | 1.286719 | 0.120925 |
| ARID1B   | 0.196933 | 0.004351 | 8.913617 | 0.403524 |
| CLPTM1L  | 0.951109 | 0.405538 | 2.230636 | 0.908242 |
| NEDD4L   | 0.599513 | 0.121846 | 2.949763 | 0.529117 |
| FOXP3    | 0.45562  | 0.095433 | 2.175243 | 0.324331 |

|          |          |          |          |          |
|----------|----------|----------|----------|----------|
| PPP1R3F  | 0.70136  | 0.211645 | 2.324207 | 0.561712 |
| HEXB     | 1.119621 | 0.777662 | 1.611948 | 0.543427 |
| PTCD2    | 0.300129 | 0.101578 | 0.88678  | 0.029455 |
| DKK3     | 1.429137 | 0.029216 | 69.90914 | 0.857229 |
| ARHGEF5  | 1.010795 | 0.382538 | 2.670865 | 0.982721 |
| NFE2L3   | 1.795969 | 0.730754 | 4.413938 | 0.201862 |
| LIMA1    | 0.863873 | 0.447103 | 1.669136 | 0.663238 |
| LETMD1   | 0.685568 | 0.254071 | 1.849893 | 0.456036 |
| SLC4A8   | 0.173919 | 0.010426 | 2.901117 | 0.223152 |
| LAMC3    | 2.221313 | 0.698523 | 7.063807 | 0.176338 |
| PTGER3   | 0.099699 | 0.002307 | 4.307986 | 0.23018  |
| MAPK9    | 0.660667 | 0.214552 | 2.034381 | 0.470085 |
| COL23A1  | 0.710383 | 0.458667 | 1.100241 | 0.125527 |
| BCAR1    | 0.159917 | 0.011542 | 2.215695 | 0.171694 |
| FAM160A  | 1.336636 | 0.73549  | 2.429125 | 0.341101 |
| HERPUD1  | 1.131197 | 0.737998 | 1.73389  | 0.571578 |
| HOMER3   | 1.244712 | 0.947869 | 1.634518 | 0.115302 |
| RAD51    | 0.318226 | 0.063744 | 1.588653 | 0.1628   |
| POLQ     | 0.523254 | 0.283492 | 0.965794 | 0.038334 |
| PIK3CB   | 0.757838 | 0.434527 | 1.321707 | 0.328522 |
| CYBA     | 1.578897 | 0.854956 | 2.915841 | 0.144489 |
| THOC3    | 0.477531 | 0.171833 | 1.32708  | 0.156387 |
| HEBP2    | 1.431564 | 0.93042  | 2.202635 | 0.102697 |
| MPHOSPH  | 0.174252 | 0.06075  | 0.49982  | 0.001155 |
| PLEKHA5  | 0.783359 | 0.416129 | 1.474664 | 0.449353 |
| PRSS8    | 0.238304 | 0.042318 | 1.341952 | 0.10386  |
| RRP12    | 1.015668 | 0.606415 | 1.701115 | 0.952886 |
| FNIP2    | 1.050999 | 0.267684 | 4.126505 | 0.943174 |
| TTC17    | 0.572081 | 0.314713 | 1.039922 | 0.067014 |
| ALX4     | 1.822897 | 0.261979 | 12.68403 | 0.544095 |
| FOXN3    | 0.063564 | 0.002658 | 1.520008 | 0.088861 |
| AKR7A2   | 1.356953 | 0.659792 | 2.790759 | 0.406716 |
| MRT04    | 0.571486 | 0.262408 | 1.244616 | 0.158856 |
| NNAT     | 1.433632 | 0.153027 | 13.43098 | 0.752343 |
| USE1     | 1.395069 | 0.645496 | 3.015071 | 0.397145 |
| MCF2L2   | 0.417691 | 0.041487 | 4.205323 | 0.458737 |
| NRIP2    | 0.269923 | 0.016758 | 4.347764 | 0.35572  |
| LAMA3    | 37.49755 | 2.087419 | 673.5908 | 0.013919 |
| ANAPC4   | 0.442842 | 0.241598 | 0.811717 | 0.008421 |
| KCNQ1    | 9.442302 | 1.303    | 68.42444 | 0.026291 |
| TRAPPC3  | 0.233607 | 0.093609 | 0.582977 | 0.00183  |
| THRAP3   | 0.572541 | 0.184836 | 1.773479 | 0.333672 |
| PHPT1    | 1.231296 | 0.642466 | 2.359798 | 0.530725 |
| ENTPD2   | 0.580224 | 0.017209 | 19.56345 | 0.761688 |
| LY75     | 1.051968 | 0.53757  | 2.058591 | 0.882417 |
| ARID4B   | 1.154369 | 0.5159   | 2.582996 | 0.726831 |
| OPN3     | 1.522778 | 0.634474 | 3.654765 | 0.346474 |
| SDCCAG8  | 0.409383 | 0.190112 | 0.881555 | 0.022484 |
| HHAT     | 0.279019 | 0.111049 | 0.701056 | 0.006617 |
| KIF1B    | 1.644266 | 0.569043 | 4.75115  | 0.358325 |
| FOXC1    | 1.008357 | 0.89281  | 1.138859 | 0.893379 |
| TBC1D22A | 3.302917 | 1.126076 | 9.68786  | 0.029538 |
| SYNE2    | 0.638382 | 0.073066 | 5.577545 | 0.684866 |
| PLEKHH1  | 0.096756 | 0.009768 | 0.958402 | 0.045904 |
| ATP9A    | 1.056699 | 0.497653 | 2.243758 | 0.885858 |
| FAM168A  | 0.038247 | 0.002209 | 0.662317 | 0.024888 |
| RELT     | 0.913326 | 0.089831 | 9.285917 | 0.938926 |
| GALC     | 0.636737 | 0.406818 | 0.996597 | 0.048282 |

|          |          |          |          |          |
|----------|----------|----------|----------|----------|
| NOP58    | 0.420669 | 0.22446  | 0.788392 | 0.006896 |
| KCNH2    | 0.509757 | 0.240844 | 1.078924 | 0.078172 |
| CUL1     | 0.602329 | 0.214264 | 1.693241 | 0.336396 |
| FAM114A2 | 0.545828 | 0.126988 | 2.346114 | 0.415771 |
| CYFIP2   | 0.786902 | 0.460351 | 1.345091 | 0.380955 |
| EIF2AK2  | 0.92787  | 0.419177 | 2.053891 | 0.853497 |
| USP36    | 0.855876 | 0.498741 | 1.468746 | 0.57219  |
| PUM2     | 0.797326 | 0.457056 | 1.390922 | 0.425015 |
| MRPL43   | 1.077435 | 0.352303 | 3.295077 | 0.895958 |
| ITIH4    | 0.113977 | 0.033468 | 0.38815  | 0.000513 |
| ZFR      | 1.117158 | 0.598354 | 2.085794 | 0.728004 |
| ZNF280C  | 0.166189 | 0.0264   | 1.046155 | 0.05589  |
| TRAF1    | 1.066832 | 0.141472 | 8.044905 | 0.949957 |
| RC3H2    | 0.39678  | 0.170521 | 0.923254 | 0.03193  |
| IL17RB   | 0.147939 | 0.007543 | 2.901339 | 0.208218 |
| TRAF3IP2 | 2.330608 | 0.479108 | 11.33717 | 0.294496 |
| GYG2     | 0.485121 | 0.152767 | 1.540536 | 0.219832 |
| DCBLD2   | 0.926705 | 0.46007  | 1.866634 | 0.831286 |
| SOAT1    | 0.949412 | 0.388263 | 2.321582 | 0.909405 |
| PKP2     | 1.086435 | 0.455927 | 2.588882 | 0.851563 |
| MSH4     | 6.045739 | 0.624854 | 58.4952  | 0.120213 |
| GDI2     | 1.214138 | 0.596927 | 2.469533 | 0.592209 |
| PRDM1    | 1.993453 | 0.946198 | 4.199815 | 0.0696   |
| ATG5     | 1.746824 | 0.684518 | 4.457727 | 0.243222 |
| TMCC3    | 0.320689 | 0.045384 | 2.266015 | 0.254289 |
| MTA3     | 2.028209 | 0.913784 | 4.501754 | 0.082153 |
| USP13    | 0.551497 | 0.241434 | 1.259758 | 0.157934 |
| ATP11B   | 0.645121 | 0.339266 | 1.226713 | 0.181296 |
| SEC61A1  | 0.949954 | 0.340283 | 2.651947 | 0.921919 |
| PPP1R12A | 0.827444 | 0.40849  | 1.676085 | 0.598933 |
| CROCC    | 3.239816 | 1.082093 | 9.700099 | 0.035643 |
| POLR3E   | 0.330154 | 0.130255 | 0.836835 | 0.019526 |
| ATP2B4   | 0.598133 | 0.323099 | 1.107287 | 0.101918 |
| ZC3H11A  | 1.253362 | 0.325725 | 4.822839 | 0.742559 |
| RIOK2    | 1.021504 | 0.4863   | 2.145734 | 0.955194 |
| YIPF1    | 1.909019 | 0.683758 | 5.32989  | 0.217096 |
| DGKG     | 1.221824 | 0.480968 | 3.103852 | 0.673621 |
| FLYWCH1  | 0.180929 | 0.040487 | 0.808538 | 0.025208 |
| UNKL     | 1.903739 | 0.126013 | 28.76068 | 0.642116 |
| TBXAS1   | 1.796922 | 0.956571 | 3.375524 | 0.068465 |
| PARP12   | 1.557211 | 0.890285 | 2.723743 | 0.120525 |
| ALDH18A1 | 0.348338 | 0.19005  | 0.638462 | 0.000646 |
| TARBP1   | 0.482203 | 0.289301 | 0.803729 | 0.005139 |
| MXD1     | 0.839231 | 0.586653 | 1.200555 | 0.33735  |
| DNAJC25  | 0.359007 | 0.167055 | 0.771515 | 0.008677 |
| SLC2A3   | 1.064601 | 0.815182 | 1.390334 | 0.645787 |
| PSD      | 1.404029 | 0.187918 | 10.49018 | 0.740857 |
| CTDP1    | 1.639092 | 0.66166  | 4.060431 | 0.285685 |
| STYK1    | 0.85113  | 0.037232 | 19.45719 | 0.919586 |
| WNK1     | 1.052065 | 0.555367 | 1.99299  | 0.876265 |
| CCAR1    | 0.942306 | 0.394226 | 2.252363 | 0.893672 |
| OGFR     | 2.189621 | 1.334908 | 3.591587 | 0.001909 |
| GNA15    | 0.82351  | 0.565333 | 1.199591 | 0.311651 |
| CREB3L3  | 0.155656 | 0.016962 | 1.428431 | 0.100035 |
| PIGV     | 0.904391 | 0.409495 | 1.997394 | 0.803681 |
| PTPRU    | 0.974302 | 0.024928 | 38.08034 | 0.988894 |
| SNRNP40  | 1.059565 | 0.50152  | 2.238552 | 0.879495 |
| COL11A1  | 1.174249 | 0.011688 | 117.9773 | 0.945551 |

|         |          |          |          |          |
|---------|----------|----------|----------|----------|
| QSER1   | 2.902083 | 0.179822 | 46.83565 | 0.452759 |
| ACAA1   | 1.338062 | 0.575633 | 3.110331 | 0.498608 |
| BCAT1   | 1.368824 | 0.998103 | 1.877239 | 0.051393 |
| HDAC7   | 2.312903 | 0.731991 | 7.308178 | 0.153158 |
| LZTS1   | 0.308798 | 0.026454 | 3.604542 | 0.348626 |
| SPAG4   | 0.286968 | 0.048369 | 1.702566 | 0.16938  |
| NCKAP1  | 3.82322  | 0.211726 | 69.0374  | 0.363669 |
| MRPS35  | 0.718523 | 0.333674 | 1.547245 | 0.398303 |
| TNK2    | 1.638919 | 0.321103 | 8.365098 | 0.552489 |
| MON2    | 0.426536 | 0.184754 | 0.984729 | 0.045932 |
| GPBP1   | 1.109791 | 0.555991 | 2.215208 | 0.767689 |
| DGAT2   | 3.787514 | 1.037962 | 13.82061 | 0.04376  |
| CS      | 0.339733 | 0.115553 | 0.998842 | 0.049754 |
| LTK     | 0.465522 | 0.147442 | 1.469808 | 0.192431 |
| MRPS24  | 2.065525 | 0.869739 | 4.905375 | 0.100235 |
| ELMO2   | 1.86562  | 0.432837 | 8.041209 | 0.402833 |
| APPBP2  | 0.631274 | 0.26592  | 1.498596 | 0.297005 |
| POLD1   | 0.670503 | 0.380864 | 1.180408 | 0.165991 |
| SEZ6    | 2.407609 | 0.392675 | 14.76178 | 0.342293 |
| EIF4B   | 0.826436 | 0.516975 | 1.321143 | 0.425778 |
| SLC6A16 | 1.373947 | 0.192984 | 9.781809 | 0.751075 |
| SPHK2   | 0.990564 | 0.476243 | 2.060327 | 0.979757 |
| RPL18   | 2.435458 | 0.173423 | 34.20229 | 0.509058 |
| CA11    | 2.334625 | 0.901576 | 6.045496 | 0.080719 |
| ISOC2   | 1.001596 | 0.585719 | 1.712755 | 0.995353 |
| U2AF2   | 1.143586 | 0.432732 | 3.022169 | 0.786702 |
| EPN1    | 1.627326 | 0.944219 | 2.804635 | 0.079551 |
| MED29   | 0.547804 | 0.244392 | 1.227903 | 0.1439   |
| ZNF275  | 0.424525 | 0.109338 | 1.648304 | 0.215749 |
| MTMR1   | 1.323381 | 0.081244 | 21.55639 | 0.843986 |
| GPC1    | 3.497885 | 0.781091 | 15.66424 | 0.101636 |
| ADCK1   | 1.260345 | 0.446077 | 3.560978 | 0.662379 |
| HAGH    | 0.789566 | 0.480831 | 1.296535 | 0.350459 |
| RNF4    | 1.608544 | 0.540392 | 4.788036 | 0.393057 |
| CASP8   | 0.412783 | 0.130941 | 1.301269 | 0.130932 |
| TM7SF3  | 0.662466 | 0.419846 | 1.045288 | 0.076791 |
| DLX3    | 1.457111 | 0.86175  | 2.463792 | 0.160095 |
| SPA17   | 0.807875 | 0.424707 | 1.536736 | 0.515493 |
| TSPAN32 | 0.410017 | 0.198695 | 0.846089 | 0.015859 |
| ST3GAL6 | 0.6098   | 0.342564 | 1.085508 | 0.092743 |
| ATP2C2  | 1.255696 | 0.499201 | 3.15859  | 0.628536 |
| NGFR    | 2.558529 | 0.337622 | 19.38877 | 0.363274 |
| TAF2    | 0.713698 | 0.357894 | 1.423228 | 0.33817  |
| HIPK2   | 1.113778 | 0.746915 | 1.660832 | 0.597096 |
| TNPO3   | 0.730186 | 0.310775 | 1.71562  | 0.470605 |
| RFXANK  | 1.426826 | 0.562598 | 3.618625 | 0.454101 |
| TMEM161 | 1.081644 | 0.391867 | 2.985587 | 0.87958  |
| LPAR2   | 1.02217  | 0.559803 | 1.866426 | 0.943096 |
| CTSA    | 0.814339 | 0.544225 | 1.218516 | 0.317885 |
| SLC12A2 | 0.612137 | 0.306943 | 1.220788 | 0.163459 |
| SNX24   | 1.174375 | 0.41798  | 3.299577 | 0.7604   |
| CNN2    | 0.802851 | 0.40972  | 1.573198 | 0.522313 |
| ABCA7   | 0.936539 | 0.231293 | 3.792179 | 0.926788 |
| DDX20   | 0.460181 | 0.140507 | 1.50716  | 0.199759 |
| BTBD1   | 0.632857 | 0.26914  | 1.488102 | 0.294287 |
| FAR2    | 1.131248 | 0.585678 | 2.185026 | 0.713498 |
| POU1F1  | 0.201924 | 0.014713 | 2.771181 | 0.231222 |
| CHI3L2  | 0.304375 | 0.026318 | 3.520161 | 0.340917 |

|          |          |          |          |          |
|----------|----------|----------|----------|----------|
| SBNO2    | 2.681896 | 1.473547 | 4.881123 | 0.001243 |
| PMS1     | 0.52226  | 0.25131  | 1.085336 | 0.081763 |
| HMG20B   | 1.186533 | 0.59882  | 2.351058 | 0.623981 |
| CALCRL   | 3.093098 | 1.855586 | 5.155922 | 1.48E-05 |
| TAF11    | 0.38825  | 0.030328 | 4.970263 | 0.467036 |
| ANKS1A   | 1.204103 | 0.792584 | 1.82929  | 0.38403  |
| AP3D1    | 2.556164 | 0.619268 | 10.55113 | 0.194473 |
| ZNF76    | 0.954751 | 0.31749  | 2.871113 | 0.934304 |
| SLC9A3R2 | 2.874893 | 0.914157 | 9.04113  | 0.070851 |
| NTHL1    | 1.665479 | 1.062505 | 2.610643 | 0.026126 |
| UHRF1BP1 | 0.723679 | 0.310929 | 1.684342 | 0.453055 |
| GNAI3    | 1.152393 | 0.604925 | 2.195328 | 0.666212 |
| IPO5     | 0.483361 | 0.25098  | 0.930903 | 0.029699 |
| OAT      | 0.930122 | 0.592745 | 1.459525 | 0.752668 |
| WDR3     | 0.321717 | 0.028287 | 3.658948 | 0.360589 |
| PKN2     | 1.190004 | 0.42182  | 3.357141 | 0.742351 |
| WDR18    | 0.944774 | 0.489164 | 1.82474  | 0.865675 |
| TRAM2    | 1.278678 | 0.646719 | 2.528172 | 0.479685 |
| NTN1     | 3.006917 | 0.916249 | 9.868003 | 0.069415 |
| MCM10    | 0.537837 | 0.267331 | 1.082064 | 0.082064 |
| DGKA     | 2.330581 | 0.571757 | 9.499854 | 0.237923 |
| ERBB3    | 0.008334 | 7.38E-05 | 0.941404 | 0.047144 |
| ANKRD44  | 0.916533 | 0.291462 | 2.882138 | 0.881473 |
| ADAT1    | 0.609107 | 0.230893 | 1.606855 | 0.316496 |
| PDIA5    | 0.538377 | 0.260255 | 1.113715 | 0.095006 |
| TBC1D22B | 0.802559 | 0.285591 | 2.255326 | 0.676514 |
| NDUFB4   | 0.164058 | 0.01056  | 2.548651 | 0.196531 |
| SPEN     | 1.176895 | 0.581246 | 2.382951 | 0.650892 |
| MYLK     | 3.41921  | 0.65095  | 17.95989 | 0.146314 |
| ZC3H15   | 1.012118 | 0.467293 | 2.192161 | 0.975631 |
| MAP2K4   | 0.788105 | 0.263274 | 2.35917  | 0.670351 |
| SLK      | 0.612423 | 0.307494 | 1.219736 | 0.163049 |
| CYB5R4   | 1.005204 | 0.556579 | 1.81544  | 0.986269 |
| COL17A1  | 0.875136 | 0.607236 | 1.261228 | 0.474428 |
| GSTO2    | 1.355226 | 0.391227 | 4.694559 | 0.631572 |
| SEC61A2  | 0.495357 | 0.157245 | 1.560485 | 0.230186 |
| PRKCQ    | 0.82906  | 0.528113 | 1.301502 | 0.415237 |
| TLE2     | 0.481755 | 0.104838 | 2.213783 | 0.347932 |
| ASB1     | 0.457155 | 0.255496 | 0.817981 | 0.008369 |
| FAM107B  | 1.01422  | 0.707364 | 1.454192 | 0.938779 |
| ME1      | 4.596572 | 2.005209 | 10.53679 | 0.000314 |
| TBC1D1   | 1.678419 | 0.483733 | 5.823642 | 0.414589 |
| MTHFD2   | 0.479996 | 0.189856 | 1.213532 | 0.120902 |
| SLC9A7   | 1.653856 | 0.513287 | 5.328864 | 0.399352 |
| FOXJ2    | 0.405654 | 0.133883 | 1.229092 | 0.110655 |
| YBX1     | 0.59319  | 0.265679 | 1.324433 | 0.202547 |
| PDE4A    | 1.934292 | 0.761893 | 4.910773 | 0.165175 |
| PPP2R5A  | 0.686482 | 0.377696 | 1.247719 | 0.217213 |
| ELAVL1   | 0.32989  | 0.119259 | 0.912527 | 0.032655 |
| TIE1     | 0.626739 | 0.336295 | 1.168026 | 0.141297 |
| DIP2B    | 0.899365 | 0.420132 | 1.925246 | 0.784753 |
| SMARCD1  | 1.481004 | 0.43393  | 5.054673 | 0.53065  |
| NFYC     | 1.095244 | 0.494525 | 2.425681 | 0.82256  |
| ZMYND12  | 0.408161 | 0.142562 | 1.168586 | 0.094984 |
| SLC9A3   | 2.221769 | 0.606332 | 8.141177 | 0.228264 |
| NGEF     | 5.390686 | 0.423213 | 68.66398 | 0.194413 |
| ASPM     | 0.724434 | 0.465753 | 1.126787 | 0.152624 |
| CD84     | 0.587513 | 0.271538 | 1.271174 | 0.176811 |

|          |          |          |          |          |
|----------|----------|----------|----------|----------|
| ELOVL1   | 1.705559 | 0.583745 | 4.983226 | 0.329083 |
| SPI1     | 1.808254 | 1.199242 | 2.726543 | 0.004697 |
| MPPED2   | 1.00823  | 0.243739 | 4.170561 | 0.990973 |
| CLDN18   | 0.120246 | 0.001467 | 9.853421 | 0.34606  |
| ZBTB11   | 0.930096 | 0.420561 | 2.056963 | 0.857975 |
| ATXN3    | 0.272045 | 0.049096 | 1.507433 | 0.136181 |
| GOLGA5   | 1.029483 | 0.452726 | 2.341006 | 0.944734 |
| LRRC40   | 0.922874 | 0.271726 | 3.13439  | 0.897627 |
| ISOC1    | 0.801203 | 0.466109 | 1.377203 | 0.422587 |
| TRMT11   | 0.136052 | 0.016651 | 1.111659 | 0.062717 |
| THUMPD1  | 0.431008 | 0.189945 | 0.97801  | 0.044099 |
| KIF26A   | 1.11291  | 0.382136 | 3.24117  | 0.844495 |
| ATG2B    | 1.184383 | 0.146959 | 9.545262 | 0.87372  |
| ARFGEF1  | 0.550503 | 0.279742 | 1.083331 | 0.083947 |
| ZFAT     | 0.014089 | 0.000237 | 0.838322 | 0.040899 |
| MTFR1    | 0.632901 | 0.286101 | 1.400078 | 0.258804 |
| STAG3    | 0.386354 | 0.110259 | 1.353802 | 0.137151 |
| FECH     | 0.72152  | 0.401219 | 1.297524 | 0.275673 |
| MYO9A    | 0.430161 | 0.209166 | 0.884648 | 0.02184  |
| DDX3Y    | 1.018799 | 0.634519 | 1.635807 | 0.938552 |
| PFKP     | 1.189428 | 0.815366 | 1.735096 | 0.367884 |
| IDI1     | 1.321718 | 0.725631 | 2.407477 | 0.361927 |
| SP100    | 1.232183 | 0.458514 | 3.311292 | 0.678907 |
| KLF6     | 0.995666 | 0.671009 | 1.477402 | 0.982788 |
| NEO1     | 2.116439 | 0.820738 | 5.457668 | 0.120848 |
| TRAM1    | 1.090917 | 0.565025 | 2.106279 | 0.795452 |
| PHKA1    | 0.844763 | 0.157331 | 4.535814 | 0.844039 |
| TNFRSF1A | 2.063095 | 1.220284 | 3.488007 | 0.006871 |
| CACNB1   | 0.612996 | 0.011208 | 33.52568 | 0.810564 |
| EVI5     | 1.173244 | 0.632925 | 2.174823 | 0.611882 |
| STOML1   | 1.921824 | 0.768992 | 4.802919 | 0.162147 |
| DHX29    | 1.013006 | 0.4707   | 2.180118 | 0.973639 |
| DNTTIP2  | 1.130289 | 0.706785 | 1.807555 | 0.609161 |
| TP53BP1  | 0.697004 | 0.394376 | 1.231854 | 0.214122 |
| TRO      | 1.469559 | 0.853835 | 2.529296 | 0.164657 |
| RRP15    | 0.414893 | 0.149021 | 1.155113 | 0.092192 |
| RHOA     | 0.954907 | 0.330626 | 2.757944 | 0.93205  |
| DHX8     | 1.125057 | 0.283418 | 4.46604  | 0.866963 |
| PRKCZ    | 5.449128 | 1.589442 | 18.68139 | 0.006994 |
| ZFY      | 0.766925 | 0.314433 | 1.870581 | 0.559669 |
| IARS2    | 0.792525 | 0.449439 | 1.397511 | 0.421698 |
| NAV3     | 0.764321 | 0.265179 | 2.202988 | 0.61875  |
| IDH3G    | 2.541021 | 0.765647 | 8.433113 | 0.127591 |
| ROGDI    | 1.249164 | 0.801666 | 1.946461 | 0.325558 |
| PDZD4    | 1.073549 | 0.534201 | 2.157443 | 0.842032 |
| ROCK1    | 0.933078 | 0.452004 | 1.926167 | 0.851419 |
| CBFB     | 0.44733  | 0.135773 | 1.473809 | 0.186035 |
| PDK3     | 0.448788 | 0.152969 | 1.316676 | 0.144568 |
| HYAL2    | 4.925292 | 0.975555 | 24.86636 | 0.053606 |
| HDAC4    | 1.444336 | 0.900657 | 2.316205 | 0.127073 |
| RASSF1   | 0.359396 | 0.132449 | 0.97521  | 0.04451  |
| FGFR3    | 0.775713 | 0.35545  | 1.692871 | 0.523572 |
| IFI35    | 2.408247 | 1.257543 | 4.611893 | 0.00802  |
| HEATR6   | 0.717466 | 0.326316 | 1.577485 | 0.40881  |
| COASY    | 0.447195 | 0.152355 | 1.312612 | 0.142967 |
| PLEKHH3  | 1.043659 | 0.693547 | 1.570512 | 0.837615 |
| MEF2A    | 0.480672 | 0.086261 | 2.678447 | 0.403245 |
| OTUD5    | 2.427143 | 0.923982 | 6.375689 | 0.071938 |

|         |          |          |          |          |
|---------|----------|----------|----------|----------|
| TFE3    | 5.395702 | 1.843699 | 15.79086 | 0.002094 |
| TBC1D25 | 0.65227  | 0.089864 | 4.734418 | 0.67265  |
| ACSL4   | 0.778068 | 0.109556 | 5.525847 | 0.8019   |
| INPP5A  | 8.621583 | 1.801654 | 41.25747 | 0.006997 |
| GPKOW   | 0.417868 | 0.161624 | 1.080369 | 0.071788 |
| GRIPAP1 | 0.989326 | 0.210999 | 4.638723 | 0.989139 |
| FTSJ1   | 0.530272 | 0.045329 | 6.203315 | 0.613184 |
| PRR11   | 1.021706 | 0.452359 | 2.307647 | 0.958801 |
| ATP11A  | 0.299971 | 0.007227 | 12.45175 | 0.526485 |
| POLR1A  | 0.674352 | 0.102466 | 4.438064 | 0.681923 |
| LAPTM4A | 0.81014  | 0.367616 | 1.785359 | 0.601495 |
| TTC7A   | 2.531479 | 1.173535 | 5.460756 | 0.017888 |
| IP6K2   | 0.978006 | 0.427416 | 2.237858 | 0.958005 |
| SRBD1   | 0.576291 | 0.345117 | 0.962315 | 0.035134 |
| KIF2A   | 0.534334 | 0.238408 | 1.197583 | 0.12799  |
| RASGRP2 | 1.141772 | 0.449121 | 2.902656 | 0.780627 |
| PSME4   | 0.572327 | 0.318208 | 1.029382 | 0.062424 |
| IFT80   | 0.14672  | 0.011542 | 1.865155 | 0.139019 |
| SIRT2   | 5.840378 | 2.143451 | 15.9136  | 0.000559 |
| PPP2R5B | 1.605391 | 0.912947 | 2.823034 | 0.100236 |
| PYGM    | 0.329955 | 0.040798 | 2.668501 | 0.2985   |
| PITX1   | 1.165698 | 0.948856 | 1.432095 | 0.144282 |
| MAST4   | 0.989343 | 0.578339 | 1.692433 | 0.968799 |
| SDK2    | 1.54145  | 1.000776 | 2.374226 | 0.04959  |
| NUP133  | 0.766857 | 0.402169 | 1.462245 | 0.420183 |
| NUCKS1  | 0.449459 | 0.175599 | 1.150421 | 0.095368 |
| VPS35   | 0.894157 | 0.440121 | 1.816583 | 0.757064 |
| DNAJA2  | 0.464665 | 0.19322  | 1.117453 | 0.086912 |
| BCL3    | 1.579904 | 1.111125 | 2.246458 | 0.010875 |
| KCNAB2  | 3.033896 | 0.822418 | 11.19203 | 0.095631 |
| GAL     | 0.856269 | 0.273073 | 2.684988 | 0.790151 |
| CLEC2D  | 0.250969 | 0.041799 | 1.506873 | 0.130633 |
| FUNDC1  | 0.477027 | 0.166886 | 1.363532 | 0.167185 |
| RORA    | 1.349594 | 0.292899 | 6.218549 | 0.700515 |
| DRD4    | 1.07975  | 0.577267 | 2.019619 | 0.810201 |
| TGFBR3  | 0.995034 | 0.690476 | 1.433927 | 0.978696 |
| PLA2G10 | 1.383699 | 0.294786 | 6.49495  | 0.680596 |
| ATP1B3  | 1.088747 | 0.241999 | 4.898245 | 0.911762 |
| NEDD4   | 0.234758 | 0.04676  | 1.1786   | 0.078348 |
| PIGB    | 0.492057 | 0.266507 | 0.908492 | 0.023408 |
| MAPK6   | 0.602393 | 0.321302 | 1.129395 | 0.113989 |
| GNB5    | 0.425276 | 0.132848 | 1.361397 | 0.149789 |
| RAB27A  | 0.387398 | 0.168802 | 0.889073 | 0.025262 |
| LRP6    | 0.429571 | 0.060296 | 3.060417 | 0.398983 |
| SCT     | 1.492464 | 0.405315 | 5.495599 | 0.547119 |
| PHRF1   | 2.14998  | 0.716945 | 6.447378 | 0.171908 |
| NUCB2   | 0.396116 | 0.249916 | 0.627844 | 8.12E-05 |
| PFN2    | 0.103357 | 0.002165 | 4.934491 | 0.249869 |
| SPTB    | 0.664064 | 0.143875 | 3.06503  | 0.599851 |
| DAPP1   | 1.06576  | 0.496156 | 2.289291 | 0.870308 |
| SLC44A1 | 0.769497 | 0.511297 | 1.158084 | 0.209017 |
| SMG6    | 1.117355 | 0.197515 | 6.320945 | 0.900125 |
| EXOC5   | 0.399629 | 0.094853 | 1.683693 | 0.211311 |
| CLTCL1  | 0.616362 | 0.206676 | 1.838153 | 0.385385 |
| FGF22   | 0.015083 | 0.000521 | 0.436628 | 0.014584 |
| FSTL3   | 1.273351 | 0.749647 | 2.162914 | 0.371339 |
| DGCR2   | 2.896821 | 1.33445  | 6.288409 | 0.007155 |
| RNF126  | 1.308687 | 0.556383 | 3.078207 | 0.537587 |

|          |          |          |          |          |
|----------|----------|----------|----------|----------|
| MNT      | 2.201028 | 1.215106 | 3.986914 | 0.009249 |
| ZXDC     | 1.239072 | 0.335288 | 4.579046 | 0.747888 |
| JMJD6    | 0.92084  | 0.298189 | 2.843655 | 0.886013 |
| POLB     | 0.598335 | 0.31517  | 1.135911 | 0.116337 |
| ST6GALNA | 1.063027 | 0.327543 | 3.450002 | 0.91895  |
| WIPI1    | 0.86253  | 0.512036 | 1.452939 | 0.578328 |
| GBA2     | 0.221724 | 0.028194 | 1.743708 | 0.152273 |
| NDST1    | 1.245298 | 0.57067  | 2.717451 | 0.581624 |
| ASNS     | 0.551256 | 0.302518 | 1.00451  | 0.051743 |
| AP3M2    | 0.646758 | 0.351699 | 1.189361 | 0.160904 |
| ST6GALNA | 1.621798 | 0.785081 | 3.350264 | 0.191457 |
| PABPC1   | 1.791267 | 0.647444 | 4.955852 | 0.261566 |
| TESK2    | 0.686792 | 0.259097 | 1.820491 | 0.449998 |
| CSNK2A2  | 1.930303 | 0.825971 | 4.511141 | 0.128886 |
| EIF2B3   | 0.52816  | 0.219147 | 1.272904 | 0.154933 |
| CAMK2A   | 0.934406 | 0.348104 | 2.508197 | 0.892874 |
| TCOF1    | 0.106282 | 0.002742 | 4.119018 | 0.229625 |
| CDC42    | 0.544154 | 0.137845 | 2.148088 | 0.385063 |
| OSBPL3   | 0.854833 | 0.281595 | 2.595006 | 0.7819   |
| SLC12A3  | 5.127879 | 0.297066 | 88.51624 | 0.260681 |
| RAD18    | 2.744277 | 0.11765  | 64.01209 | 0.529859 |
| ATP2B1   | 3.020092 | 1.117654 | 8.160804 | 0.029311 |
| TRPM5    | 2.582051 | 0.199635 | 33.39592 | 0.467662 |
| NCK2     | 1.170012 | 0.462673 | 2.95874  | 0.74011  |
| MAP4K4   | 0.352784 | 0.097693 | 1.273952 | 0.111749 |
| MGAT4A   | 0.478277 | 0.253372 | 0.902818 | 0.022885 |
| RPL31    | 1.116448 | 0.293976 | 4.239991 | 0.871471 |
| WDR1     | 1.388406 | 0.55199  | 3.49222  | 0.485617 |
| SNX13    | 0.775669 | 0.378835 | 1.588193 | 0.487201 |
| ARHGAP10 | 0.573693 | 0.320056 | 1.02833  | 0.062021 |
| RPS6KA2  | 0.528003 | 0.197686 | 1.410252 | 0.202616 |
| ING3     | 0.699814 | 0.230219 | 2.12728  | 0.529185 |
| VASH1    | 1.089628 | 0.618276 | 1.920323 | 0.766547 |
| SEL1L    | 0.707118 | 0.177656 | 2.814518 | 0.622915 |
| TRIP13   | 0.384541 | 0.200088 | 0.739034 | 0.004141 |
| ATP6AP1  | 0.535144 | 0.214986 | 1.332081 | 0.179044 |
| TCF3     | 0.993302 | 0.580369 | 1.700037 | 0.980444 |
| TRIB2    | 0.490571 | 0.24892  | 0.966814 | 0.039642 |
| DAZAP1   | 0.93144  | 0.221629 | 3.914563 | 0.922761 |
| MBD3     | 1.115656 | 0.534133 | 2.330296 | 0.770878 |
| HLTF     | 0.474619 | 0.234937 | 0.958827 | 0.037787 |
| FAM50A   | 1.139319 | 0.570621 | 2.2748   | 0.711599 |
| FAM3A    | 0.785262 | 0.3852   | 1.600822 | 0.505918 |
| CPSF1    | 0.580901 | 0.293617 | 1.149273 | 0.118688 |
| CYBRD1   | 1.079534 | 0.745329 | 1.563596 | 0.685561 |
| PDCD2    | 0.386161 | 0.130139 | 1.145856 | 0.086416 |
| RDH11    | 0.828049 | 0.332759 | 2.060543 | 0.685    |
| PRKACA   | 4.993059 | 0.208361 | 119.6511 | 0.321106 |
| ACTN1    | 1.152186 | 0.693707 | 1.91368  | 0.584216 |
| ZFYVE26  | 0.586879 | 0.249835 | 1.378618 | 0.221297 |
| EPN2     | 9.326892 | 1.194718 | 72.81295 | 0.033201 |
| PTPN18   | 0.766117 | 0.150894 | 3.889714 | 0.747918 |
| LIMS2    | 0.375166 | 0.088949 | 1.582361 | 0.181865 |
| LNX1     | 0.031392 | 0.002022 | 0.487481 | 0.013383 |
| ALDH3A2  | 1.243294 | 0.650775 | 2.375291 | 0.509695 |
| TFRC     | 0.582824 | 0.394813 | 0.860366 | 0.006591 |
| SREBF1   | 3.364681 | 1.69753  | 6.66915  | 0.000509 |
| TRPC5    | 0.737779 | 0.115579 | 4.709476 | 0.747796 |



|          |          |          |          |          |
|----------|----------|----------|----------|----------|
| AFF4     | 0.777533 | 0.386476 | 1.564281 | 0.480498 |
| UBE2D1   | 1.610702 | 0.259103 | 10.01284 | 0.609137 |
| MPP5     | 0.61576  | 0.155947 | 2.431332 | 0.488922 |
| RHOBTB1  | 0.188667 | 0.018032 | 1.97395  | 0.163842 |
| SMC1A    | 0.102362 | 0.016069 | 0.652059 | 0.015839 |
| HSD17B10 | 1.613015 | 0.701732 | 3.707707 | 0.260222 |
| MARK2    | 3.060868 | 1.244442 | 7.528601 | 0.014842 |
| HMMR     | 0.821023 | 0.535925 | 1.257785 | 0.36487  |
| CHFR     | 1.149126 | 0.452131 | 2.920591 | 0.770234 |
| P4HA2    | 0.413083 | 0.008389 | 20.34067 | 0.656548 |
| FCGR2B   | 2.067672 | 1.219295 | 3.506344 | 0.007023 |
| NFATC3   | 0.261539 | 0.0443   | 1.544085 | 0.13876  |
| TRNT1    | 0.269    | 0.057336 | 1.262051 | 0.09594  |
| ACADVL   | 0.893918 | 0.354581 | 2.253621 | 0.812118 |
| STK10    | 2.200364 | 1.037743 | 4.665513 | 0.039727 |
| FBXW11   | 0.940086 | 0.082328 | 10.73461 | 0.960341 |
| ACAP1    | 1.202933 | 0.759392 | 1.905534 | 0.431144 |
| CRMP1    | 0.040096 | 0.00104  | 1.545569 | 0.084296 |
| EVC      | 0.28521  | 0.005706 | 14.25511 | 0.529616 |
| DERL2    | 0.878891 | 0.385359 | 2.004493 | 0.758933 |
| SIDT1    | 0.704776 | 0.397385 | 1.249947 | 0.231382 |
| NDE1     | 1.429191 | 0.534405 | 3.822171 | 0.476768 |
| TMEM38A  | 2.23477  | 0.324354 | 15.39736 | 0.414158 |
| AP1M1    | 0.734481 | 0.303251 | 1.778933 | 0.494148 |
| PVR      | 9.674788 | 0.40189  | 232.9033 | 0.162018 |
| XRCC1    | 1.260003 | 0.389835 | 4.072516 | 0.699408 |
| SCARB1   | 1.581676 | 0.885722 | 2.824474 | 0.121197 |
| CYP2W1   | 0.011066 | 0.000364 | 0.33672  | 0.009749 |
| MCM2     | 0.621159 | 0.404293 | 0.954355 | 0.029766 |
| PANX2    | 1.177127 | 0.860193 | 1.610834 | 0.30822  |
| TP63     | 0.563311 | 0.212689 | 1.491943 | 0.248134 |
| ALPK1    | 0.657786 | 0.325813 | 1.328009 | 0.24258  |
| LLGL2    | 0.592586 | 0.010538 | 33.32408 | 0.799099 |
| PDE8A    | 0.047559 | 0.002977 | 0.75979  | 0.031219 |
| CLCN4    | 3.038152 | 0.322169 | 28.65073 | 0.331736 |
| NLE1     | 0.911096 | 0.353409 | 2.348826 | 0.847198 |
| SDHA     | 1.744226 | 0.592931 | 5.130996 | 0.312242 |
| SMARCE1  | 0.560865 | 0.272118 | 1.156004 | 0.117091 |
| GSDMB    | 0.410047 | 0.154282 | 1.089816 | 0.073855 |
| KDM5A    | 1.816401 | 0.238589 | 13.82846 | 0.564411 |
| ADAM11   | 2.204238 | 0.283885 | 17.11491 | 0.449753 |
| PPP2R3A  | 1.224994 | 0.157199 | 9.545943 | 0.846393 |
| FERMT2   | 0.295243 | 0.037437 | 2.328387 | 0.246934 |
| DHRS9    | 1.242903 | 0.851364 | 1.81451  | 0.259993 |
| CD5L     | 1.591067 | 0.30461  | 8.310617 | 0.581906 |
| PTGS2    | 1.104216 | 0.862525 | 1.41363  | 0.431538 |
| IGF2BP2  | 1.692187 | 0.985405 | 2.905908 | 0.056563 |
| MAP3K13  | 0.002401 | 8.90E-05 | 0.064789 | 0.000334 |
| ST6GAL1  | 1.135869 | 0.357347 | 3.61049  | 0.829053 |
| TBX21    | 1.811556 | 0.627103 | 5.233164 | 0.27229  |
| FRY      | 1.010128 | 0.409753 | 2.490179 | 0.982536 |
| PICALM   | 0.991804 | 0.547281 | 1.797386 | 0.978357 |
| NSF      | 1.12001  | 0.304758 | 4.11613  | 0.864484 |
| CLASP1   | 0.415046 | 0.178302 | 0.966131 | 0.041361 |
| MRPS34   | 1.559958 | 0.840924 | 2.893805 | 0.158417 |
| NOTCH3   | 1.556598 | 1.101702 | 2.19932  | 0.012101 |
| CLNS1A   | 0.505513 | 0.254058 | 1.005849 | 0.051974 |
| TEAD2    | 1.466574 | 0.617177 | 3.484963 | 0.38587  |

|          |          |          |          |          |
|----------|----------|----------|----------|----------|
| EED      | 0.85543  | 0.236297 | 3.096791 | 0.811966 |
| TSG101   | 1.494728 | 0.611637 | 3.652838 | 0.377973 |
| ATP2A3   | 0.682878 | 0.397449 | 1.173286 | 0.167197 |
| MGLL     | 0.590789 | 0.335081 | 1.041634 | 0.068914 |
| BCS1L    | 0.677485 | 0.309369 | 1.483621 | 0.330264 |
| NUAK1    | 0.423674 | 0.052857 | 3.395919 | 0.418688 |
| DPP8     | 0.385627 | 0.104438 | 1.423891 | 0.152796 |
| SLC24A1  | 0.635617 | 0.324283 | 1.245852 | 0.186913 |
| ZNF532   | 1.930494 | 0.936821 | 3.978141 | 0.074578 |
| SCARF1   | 0.868678 | 0.040394 | 18.68123 | 0.928344 |
| LMAN1    | 1.00729  | 0.216095 | 4.695305 | 0.992621 |
| ZZEF1    | 0.78397  | 0.376876 | 1.630797 | 0.514872 |
| ENO1     | 0.954475 | 0.371978 | 2.449132 | 0.922797 |
| ANO8     | 1.657128 | 0.913547 | 3.005947 | 0.096439 |
| TUBE1    | 0.583694 | 0.177595 | 1.918406 | 0.375177 |
| ARHGEF1C | 4.110472 | 0.830521 | 20.34384 | 0.083207 |
| TXK      | 0.677491 | 0.289048 | 1.587949 | 0.370306 |
| TACR2    | 0.568865 | 0.058859 | 5.498001 | 0.625983 |
| ACTR6    | 0.93481  | 0.481982 | 1.813079 | 0.84191  |
| TIPIN    | 0.353042 | 0.139683 | 0.892298 | 0.027747 |
| SRI      | 0.045962 | 0.007261 | 0.29093  | 0.00107  |
| EIF4G3   | 0.364277 | 0.177487 | 0.747648 | 0.00591  |
| NUP37    | 0.519884 | 0.248635 | 1.087051 | 0.08218  |
| SEMA3A   | 1.799218 | 0.300847 | 10.76025 | 0.519796 |
| GTSE1    | 1.050498 | 0.436218 | 2.529804 | 0.912518 |
| SEMA3C   | 1.218587 | 0.293666 | 5.056618 | 0.7854   |
| TTC38    | 1.422247 | 0.677472 | 2.985789 | 0.351909 |
| ACAT1    | 0.810602 | 0.56044  | 1.172428 | 0.264789 |
| GRAMD4   | 0.561119 | 0.339904 | 0.926304 | 0.023866 |
| CELSR1   | 0.751202 | 0.040475 | 13.94202 | 0.847775 |
| WNT8B    | 0.141639 | 0.00633  | 3.169097 | 0.21774  |
| ZNF638   | 1.376274 | 0.412359 | 4.593404 | 0.603498 |
| SLC25A40 | 0.257823 | 0.084487 | 0.786779 | 0.017254 |
| ADD2     | 0.170437 | 0.024362 | 1.192399 | 0.074639 |
| RASAL2   | 0.060736 | 0.002117 | 1.742812 | 0.101921 |
| ZNF37A   | 0.072835 | 0.004941 | 1.073725 | 0.056372 |
| MARK3    | 1.124986 | 0.369791 | 3.422462 | 0.835645 |
| SLC25A3  | 0.157991 | 0.030342 | 0.822669 | 0.028392 |
| FNDC3B   | 0.728348 | 0.437918 | 1.211392 | 0.222024 |
| FOSL2    | 1.101475 | 0.761385 | 1.593473 | 0.607958 |
| CACNG4   | 3.819077 | 0.486079 | 30.00611 | 0.202637 |
| FRYL     | 0.201531 | 0.017661 | 2.299688 | 0.197211 |
| TMEM131  | 0.413609 | 0.193847 | 0.882513 | 0.022419 |
| FSCN1    | 1.457253 | 1.036412 | 2.048979 | 0.030338 |
| ACTB     | 2.867824 | 0.964838 | 8.524144 | 0.058018 |
| PLD1     | 0.61867  | 0.367535 | 1.041402 | 0.070719 |
| WDR62    | 0.612391 | 0.208224 | 1.801056 | 0.372947 |
| DLG1     | 0.355505 | 0.061317 | 2.061165 | 0.24876  |
| RAB7A    | 0.569772 | 0.248122 | 1.308389 | 0.184763 |
| BCAP29   | 0.398315 | 0.047879 | 3.313674 | 0.394437 |
| SEC31B   | 0.224586 | 0.047827 | 1.054611 | 0.058413 |
| SART3    | 2.271748 | 0.503154 | 10.25697 | 0.286019 |
| ARHGAP11 | 0.664108 | 0.301325 | 1.463668 | 0.310031 |
| TUBA3D   | 1.869239 | 0.783793 | 4.45788  | 0.15836  |
| EXOSC7   | 0.253342 | 0.092183 | 0.696252 | 0.007771 |
| KIFAP3   | 0.537712 | 0.313691 | 0.921717 | 0.024044 |
| MKRN2    | 0.655061 | 0.279713 | 1.534093 | 0.329896 |
| MCM6     | 0.450426 | 0.278626 | 0.728155 | 0.001136 |

|          |          |          |          |          |
|----------|----------|----------|----------|----------|
| REXO2    | 0.490669 | 0.278566 | 0.864271 | 0.013702 |
| RBM7     | 0.764566 | 0.352617 | 1.657776 | 0.496604 |
| RBMS2    | 1.720235 | 0.863522 | 3.426909 | 0.122911 |
| BAZ2A    | 1.906568 | 0.275415 | 13.19828 | 0.513303 |
| PTPN23   | 2.398677 | 1.007905 | 5.708529 | 0.047956 |
| MLH1     | 0.167996 | 0.065566 | 0.430448 | 0.000203 |
| UNG      | 0.09986  | 0.026237 | 0.380071 | 0.000729 |
| FMO4     | 0.781482 | 0.244683 | 2.495937 | 0.677294 |
| KLHL20   | 0.658087 | 0.247952 | 1.746619 | 0.400816 |
| SLC46A1  | 0.813456 | 0.145414 | 4.550523 | 0.814182 |
| PLXNA2   | 0.433606 | 0.012165 | 15.45544 | 0.646734 |
| SPAG5    | 0.511592 | 0.172448 | 1.517714 | 0.227046 |
| ANKRD13  | 0.335357 | 0.143457 | 0.783959 | 0.011677 |
| TPD52    | 1.206036 | 0.067535 | 21.53718 | 0.898636 |
| ACACB    | 0.673442 | 0.403466 | 1.124071 | 0.130402 |
| TRAF4    | 4.445039 | 1.290178 | 15.31446 | 0.018096 |
| PAG1     | 0.834056 | 0.418853 | 1.660843 | 0.605617 |
| GPATCH1  | 0.263846 | 0.048309 | 1.44104  | 0.124007 |
| ICAM3    | 0.855806 | 0.592343 | 1.236451 | 0.406868 |
| NT5C2    | 0.622555 | 0.297436 | 1.303053 | 0.208552 |
| MCAM     | 0.329917 | 0.023056 | 4.721006 | 0.414048 |
| GPC4     | 0.964666 | 0.745819 | 1.247731 | 0.784068 |
| MBNL3    | 1.064075 | 0.375758 | 3.013255 | 0.906908 |
| RAP1GAP  | 1.08275  | 0.866823 | 1.352465 | 0.483568 |
| XAB2     | 2.020431 | 1.042061 | 3.917373 | 0.037349 |
| ARHGEF1  | 3.411021 | 1.220595 | 9.532289 | 0.019277 |
| STXBP2   | 1.332081 | 0.874181 | 2.029832 | 0.182118 |
| MAP2K7   | 3.358149 | 1.32826  | 8.49018  | 0.010473 |
| DGKD     | 1.692136 | 0.427939 | 6.690967 | 0.453321 |
| RARB     | 0.036928 | 0.000512 | 2.66112  | 0.13066  |
| TOP2B    | 0.558598 | 0.364    | 0.857229 | 0.0077   |
| TM9SF3   | 0.811591 | 0.409874 | 1.60703  | 0.549217 |
| NFKB2    | 2.773738 | 1.268913 | 6.063164 | 0.010562 |
| UBE2T    | 0.760031 | 0.471984 | 1.223872 | 0.258957 |
| PPP1R12B | 0.517936 | 0.083685 | 3.205576 | 0.47931  |
| DNAJC10  | 0.979166 | 0.461748 | 2.076385 | 0.95622  |
| GTF3C1   | 1.557008 | 0.802219 | 3.021958 | 0.190659 |
| IL4R     | 1.748356 | 0.916741 | 3.334364 | 0.089875 |
| USP33    | 0.240174 | 0.065591 | 0.879449 | 0.031244 |
| SNRPA    | 1.023099 | 0.487123 | 2.148804 | 0.951905 |
| SPAG6    | 0.996196 | 0.585178 | 1.695906 | 0.988798 |
| EXOSC5   | 0.755649 | 0.459807 | 1.241839 | 0.26898  |
| DYNC112  | 0.807757 | 0.478212 | 1.364399 | 0.424735 |
| APBB1IP  | 1.979067 | 0.902129 | 4.341626 | 0.088567 |
| LRCH4    | 0.693366 | 0.381328 | 1.260741 | 0.229972 |
| FAM76B   | 0.592643 | 0.309123 | 1.136198 | 0.115153 |
| SIRT6    | 5.745498 | 2.117466 | 15.58974 | 0.000597 |
| POLD3    | 0.182198 | 0.02955  | 1.123396 | 0.066566 |
| CAPZB    | 2.900515 | 1.220401 | 6.893625 | 0.015913 |
| GPR137B  | 1.990583 | 0.85045  | 4.659203 | 0.112598 |
| NAALAD2  | 0.426674 | 0.127816 | 1.424314 | 0.166089 |
| SLC25A43 | 1.012671 | 0.435197 | 2.356412 | 0.976687 |
| UBE2A    | 0.643275 | 0.252975 | 1.635745 | 0.354176 |
| FGFR1    | 5.965042 | 0.16584  | 214.5547 | 0.328558 |
| SMC1B    | 2.698608 | 0.424207 | 17.16727 | 0.292987 |
| FBLN1    | 0.865252 | 0.080232 | 9.331195 | 0.905049 |
| CST7     | 0.83808  | 0.614747 | 1.14255  | 0.263928 |
| PIAS2    | 0.098836 | 0.016908 | 0.577743 | 0.0102   |

|          |          |          |          |          |
|----------|----------|----------|----------|----------|
| AMPH     | 1.108046 | 0.191823 | 6.400506 | 0.908715 |
| ARAF     | 0.458545 | 0.151816 | 1.384989 | 0.166824 |
| MCCC1    | 0.533318 | 0.266498 | 1.067279 | 0.075731 |
| LAMP3    | 0.444477 | 0.021785 | 9.06859  | 0.598196 |
| ACER3    | 0.72035  | 0.319132 | 1.62599  | 0.429717 |
| UBE2K    | 0.120078 | 0.017238 | 0.836473 | 0.032333 |
| PIK3C3   | 0.929685 | 0.464449 | 1.860945 | 0.836862 |
| N4BP2    | 0.680819 | 0.288521 | 1.60652  | 0.38011  |
| TULP3    | 4.039373 | 0.406135 | 40.17511 | 0.23359  |
| SYNJ2    | 1.188564 | 0.401468 | 3.5188   | 0.755083 |
| PPP2R5C  | 0.38162  | 0.074815 | 1.946601 | 0.246556 |
| GNB1     | 0.711114 | 0.245199 | 2.062341 | 0.530297 |
| HOXA9    | 1.203088 | 0.941036 | 1.538113 | 0.140186 |
| EDN1     | 1.869862 | 0.484035 | 7.223411 | 0.364056 |
| MLLT10   | 0.344138 | 0.153386 | 0.772113 | 0.009675 |
| ZCWPW1   | 0.451779 | 0.238031 | 0.857468 | 0.015086 |
| P2RY10   | 0.771863 | 0.383565 | 1.553251 | 0.467981 |
| ITM2A    | 0.811682 | 0.636669 | 1.034803 | 0.092207 |
| VDAC3    | 0.493679 | 0.233145 | 1.045357 | 0.065172 |
| PCM1     | 0.491482 | 0.277646 | 0.870009 | 0.014774 |
| TNRC6C   | 3.453895 | 0.330913 | 36.04993 | 0.300293 |
| CBFA2T2  | 0.088693 | 0.005527 | 1.42317  | 0.087125 |
| ITCH     | 0.337301 | 0.144404 | 0.78787  | 0.012046 |
| PKD2L2   | 0.041458 | 0.002973 | 0.57816  | 0.01791  |
| TP53INP2 | 0.938071 | 0.749101 | 1.17471  | 0.57752  |
| SDF4     | 2.447249 | 0.971983 | 6.161663 | 0.05748  |
| MYH7B    | 0.070229 | 0.00429  | 1.149747 | 0.062585 |
| TP73     | 0.455643 | 0.028315 | 7.332182 | 0.579226 |
| TOLLIP   | 1.942974 | 0.911004 | 4.143944 | 0.085656 |
| UBE2D4   | 0.580829 | 0.212494 | 1.587629 | 0.289609 |
| RUNX1T1  | 77.04468 | 1.252185 | 4740.419 | 0.038738 |
| THOC1    | 0.420494 | 0.215609 | 0.820072 | 0.011022 |
| FKBP7    | 0.051534 | 0.003165 | 0.839093 | 0.037233 |
| OSBPL6   | 0.841873 | 0.235179 | 3.013671 | 0.791366 |
| SLC1A3   | 1.311663 | 0.727934 | 2.363482 | 0.366519 |
| XRCC5    | 0.725476 | 0.407823 | 1.290551 | 0.27482  |
| LXN      | 0.605531 | 0.421286 | 0.870355 | 0.006726 |
| SP140    | 0.605594 | 0.33271  | 1.102291 | 0.100743 |
| MKNK1    | 1.785038 | 0.472534 | 6.743134 | 0.392837 |
| TNS1     | 1.023278 | 0.753625 | 1.389413 | 0.882778 |
| REXO1    | 1.101859 | 0.561841 | 2.160917 | 0.777742 |
| SAR1A    | 0.421787 | 0.176074 | 1.010392 | 0.052773 |
| CDC14A   | 0.487888 | 0.045139 | 5.27343  | 0.554571 |
| RAPGEF3  | 1.336264 | 0.382141 | 4.67263  | 0.649936 |
| CEACAM1  | 0.933276 | 0.717833 | 1.21338  | 0.606088 |
| SENP1    | 0.046454 | 0.00328  | 0.657911 | 0.023235 |
| DUSP13   | 0.957101 | 0.046617 | 19.65026 | 0.977313 |
| CIC      | 2.924822 | 1.397281 | 6.122307 | 0.004406 |
| LIPE     | 2.410672 | 0.774141 | 7.506819 | 0.128953 |
| FDFT1    | 1.659412 | 0.695379 | 3.959924 | 0.253749 |
| PAFAH1B3 | 1.024354 | 0.620627 | 1.690712 | 0.925015 |
| OPHN1    | 1.381189 | 0.174561 | 10.92847 | 0.759597 |
| KIF22    | 1.428857 | 0.693983 | 2.941906 | 0.332776 |
| PGM1     | 0.821273 | 0.517751 | 1.302729 | 0.402887 |
| DDX1     | 0.508521 | 0.282909 | 0.914053 | 0.0238   |
| DNM2     | 2.629205 | 1.277756 | 5.410044 | 0.008646 |
| EPB41L2  | 1.554321 | 0.841593 | 2.870644 | 0.158834 |
| STX7     | 0.987039 | 0.358748 | 2.715683 | 0.979845 |

|          |          |          |          |          |
|----------|----------|----------|----------|----------|
| RABL2B   | 0.682413 | 0.235322 | 1.978941 | 0.481781 |
| KEAP1    | 1.187214 | 0.380714 | 3.702198 | 0.76743  |
| DDX43    | 2.602464 | 0.993946 | 6.814072 | 0.051463 |
| PTPRH    | 4.511672 | 0.525972 | 38.70016 | 0.169435 |
| SLC35C2  | 2.192137 | 0.48921  | 9.822901 | 0.30505  |
| CRYBG3   | 1.17118  | 0.133389 | 10.28315 | 0.886643 |
| RFX3     | 0.312239 | 0.041136 | 2.370029 | 0.260355 |
| RIF1     | 0.242062 | 0.085129 | 0.688293 | 0.007801 |
| RAB21    | 1.069054 | 0.473676 | 2.412781 | 0.872267 |
| SLC4A4   | 0.828324 | 0.088385 | 7.762856 | 0.868965 |
| SMARCA2  | 1.129351 | 0.356429 | 3.578367 | 0.836219 |
| SESN1    | 0.921389 | 0.473652 | 1.792366 | 0.809435 |
| MID2     | 1.472556 | 0.175716 | 12.34051 | 0.721245 |
| SRCAP    | 2.834794 | 0.947858 | 8.478127 | 0.0623   |
| KCNN2    | 0.731187 | 0.011121 | 48.0746  | 0.883449 |
| CNOT4    | 0.29876  | 0.043745 | 2.040393 | 0.217779 |
| PSEN1    | 2.00759  | 0.317785 | 12.68285 | 0.45867  |
| CPOX     | 0.832401 | 0.52721  | 1.314263 | 0.431152 |
| CLDND1   | 0.675256 | 0.328416 | 1.388394 | 0.285658 |
| HSP90AA1 | 0.597865 | 0.240057 | 1.488988 | 0.269213 |
| RBL1     | 0.297202 | 0.052759 | 1.674193 | 0.168919 |
| DLGAP4   | 3.108448 | 0.819402 | 11.79208 | 0.095481 |
| IGSF9B   | 8.732062 | 1.200682 | 63.50468 | 0.032304 |
| NDC80    | 0.654084 | 0.330702 | 1.293691 | 0.222476 |
| AP4E1    | 0.787623 | 0.293828 | 2.11127  | 0.635111 |
| RSBN1    | 1.049811 | 0.561912 | 1.961346 | 0.878845 |
| MAGI3    | 0.207024 | 0.004925 | 8.702512 | 0.408992 |
| CXCL2    | 1.085193 | 0.89805  | 1.311334 | 0.397243 |
| COL4A4   | 0.157053 | 0.008591 | 2.871133 | 0.211818 |
| TCF7     | 0.563008 | 0.023525 | 13.47403 | 0.722892 |
| OSTM1    | 0.958011 | 0.529247 | 1.734134 | 0.887331 |
| IMPG2    | 0.113091 | 0.00939  | 1.361997 | 0.086046 |
| PCNP     | 0.577089 | 0.327464 | 1.017004 | 0.057218 |
| EXD2     | 0.676741 | 0.354972 | 1.290181 | 0.235601 |
| ARG2     | 0.546132 | 0.176279 | 1.691977 | 0.294434 |
| MEF2C    | 1.435123 | 0.902162 | 2.282935 | 0.127197 |
| PTPRC    | 1.766674 | 0.652383 | 4.784206 | 0.262866 |
| UBA5     | 0.350105 | 0.159031 | 0.770755 | 0.009143 |
| STK17B   | 0.902798 | 0.662546 | 1.23017  | 0.517146 |
| CDC14B   | 1.118102 | 0.324497 | 3.852588 | 0.859618 |
| ZNF510   | 0.647111 | 0.183643 | 2.280252 | 0.498229 |
| ZNF506   | 1.151866 | 0.047657 | 27.84062 | 0.930671 |
| JMJD4    | 1.458147 | 0.721066 | 2.94868  | 0.293828 |
| DUSP12   | 0.461917 | 0.20083  | 1.062426 | 0.069145 |
| AACS     | 0.689815 | 0.289656 | 1.642792 | 0.401616 |
| PHLPP1   | 0.985761 | 0.40501  | 2.399257 | 0.97479  |
| ATP8B1   | 3.649187 | 0.553907 | 24.04118 | 0.178368 |
| IL12RB2  | 1.58361  | 0.835696 | 3.000877 | 0.158659 |
| SMARCD3  | 1.345142 | 0.799317 | 2.263689 | 0.264214 |
| WDR70    | 0.495183 | 0.256814 | 0.954802 | 0.035902 |
| STRADB   | 0.892422 | 0.610168 | 1.305243 | 0.55739  |
| BZW1     | 0.737798 | 0.044481 | 12.23758 | 0.831947 |
| C1QTNF3  | 0.020455 | 0.000472 | 0.885651 | 0.04306  |
| ME2      | 0.507611 | 0.256943 | 1.002829 | 0.050958 |
| CCNT2    | 0.172951 | 0.038891 | 0.769116 | 0.02118  |
| FAM135A  | 0.561501 | 0.135308 | 2.330122 | 0.426678 |
| COL19A1  | 1.632403 | 0.102249 | 26.06122 | 0.728819 |
| EPB41L3  | 1.21899  | 0.967501 | 1.53585  | 0.093013 |

|          |          |          |          |          |
|----------|----------|----------|----------|----------|
| COBLL1   | 1.282701 | 0.902404 | 1.823266 | 0.165256 |
| DLG3     | 0.440803 | 0.008031 | 24.19416 | 0.688529 |
| TRAF5    | 0.450673 | 0.143345 | 1.416905 | 0.172658 |
| MRPL22   | 0.6899   | 0.288333 | 1.650738 | 0.404315 |
| GEMIN5   | 0.673968 | 0.220583 | 2.059234 | 0.488685 |
| NFE2L1   | 2.050457 | 0.817755 | 5.141362 | 0.12577  |
| GSK3B    | 0.395933 | 0.192821 | 0.812996 | 0.011605 |
| ITGB5    | 1.258899 | 0.725241 | 2.185244 | 0.413213 |
| ERC1     | 0.719209 | 0.069282 | 7.466019 | 0.782489 |
| XPO1     | 0.687367 | 0.38443  | 1.229023 | 0.206078 |
| RNF13    | 2.178901 | 0.934311 | 5.081405 | 0.071436 |
| PALB2    | 0.637811 | 0.17888  | 2.274169 | 0.488117 |
| LYRM2    | 0.732582 | 0.442144 | 1.213804 | 0.227097 |
| BCKDHB   | 0.132663 | 0.035446 | 0.496513 | 0.002702 |
| ULK2     | 1.077446 | 0.346974 | 3.345756 | 0.897337 |
| TNPO1    | 0.337275 | 0.095317 | 1.193434 | 0.091854 |
| PLOD1    | 1.608233 | 0.922767 | 2.80289  | 0.093665 |
| P2RX5    | 0.173573 | 0.055052 | 0.547253 | 0.0028   |
| ITGAE    | 0.600976 | 0.341596 | 1.057308 | 0.077291 |
| DIS3     | 0.450435 | 0.103615 | 1.958136 | 0.287462 |
| PIBF1    | 0.442734 | 0.15496  | 1.264929 | 0.128211 |
| TDRD3    | 0.403254 | 0.079214 | 2.052838 | 0.274055 |
| NUFIP1   | 0.28765  | 0.042412 | 1.950904 | 0.20205  |
| PDS5B    | 0.393066 | 0.14325  | 1.07854  | 0.069808 |
| OXCT1    | 0.995369 | 0.376757 | 2.629705 | 0.992528 |
| RRAGB    | 0.22125  | 0.082906 | 0.590444 | 0.002595 |
| CYLD     | 0.613314 | 0.152235 | 2.47088  | 0.491684 |
| SLC27A5  | 1.059624 | 0.583524 | 1.924176 | 0.8491   |
| ZNF324   | 1.658183 | 0.829017 | 3.316666 | 0.152771 |
| ZNF671   | 1.037299 | 0.519271 | 2.072116 | 0.917385 |
| ZNF416   | 1.202035 | 0.46251  | 3.124013 | 0.705714 |
| ZNF586   | 0.632687 | 0.247132 | 1.619754 | 0.339858 |
| ZNF446   | 0.864467 | 0.274402 | 2.723393 | 0.80355  |
| ZNF264   | 1.810976 | 0.556609 | 5.892166 | 0.323836 |
| RPS5     | 1.896863 | 0.576335 | 6.243045 | 0.2922   |
| FAT1     | 1.271851 | 0.716352 | 2.258114 | 0.411628 |
| YTHDC1   | 0.660449 | 0.215817 | 2.021124 | 0.467269 |
| CHMP2B   | 1.000106 | 0.546308 | 1.830857 | 0.999725 |
| SMAP2    | 1.324148 | 0.737982 | 2.375894 | 0.346543 |
| PIIE     | 0.448771 | 0.091567 | 2.199436 | 0.323141 |
| ZMPSTE24 | 0.959648 | 0.479718 | 1.919719 | 0.907311 |
| STARD7   | 1.063606 | 0.316791 | 3.570994 | 0.920512 |
| REST     | 0.552288 | 0.130541 | 2.336593 | 0.419825 |
| HAL      | 0.910578 | 0.618468 | 1.340656 | 0.635055 |
| SSH1     | 1.235138 | 0.699762 | 2.180123 | 0.466331 |
| GSTP1    | 1.873989 | 0.785418 | 4.471293 | 0.156901 |
| APLP2    | 1.1569   | 0.589202 | 2.271578 | 0.672033 |
| WBP11    | 1.013472 | 0.257325 | 3.991547 | 0.984734 |
| EIF3I    | 0.68542  | 0.39518  | 1.188829 | 0.178835 |
| TXLNA    | 0.57601  | 0.232411 | 1.427594 | 0.233567 |
| NCOA1    | 1.189953 | 0.411393 | 3.441934 | 0.748264 |
| AGBL5    | 0.667135 | 0.27225  | 1.634777 | 0.376083 |
| EFR3B    | 1.055629 | 0.253374 | 4.398063 | 0.940728 |
| KIF3C    | 1.007383 | 0.417719 | 2.429437 | 0.986933 |
| RAB10    | 1.136188 | 0.643339 | 2.006595 | 0.65995  |
| HADHA    | 0.603119 | 0.283152 | 1.284652 | 0.189968 |
| MAPRE3   | 1.302625 | 0.524091 | 3.237664 | 0.569266 |
| CAD      | 0.792469 | 0.43621  | 1.43969  | 0.445107 |

|          |          |          |          |          |
|----------|----------|----------|----------|----------|
| CD59     | 0.735841 | 0.230683 | 2.347205 | 0.604254 |
| CD82     | 0.892308 | 0.518118 | 1.536741 | 0.681202 |
| BCORL1   | 1.299373 | 0.571125 | 2.956218 | 0.532361 |
| ATRX     | 0.232717 | 0.007788 | 6.953982 | 0.400281 |
| FCN1     | 1.006454 | 0.863173 | 1.17352  | 0.93456  |
| MYNN     | 1.646903 | 0.492259 | 5.509882 | 0.418118 |
| SCAMP1   | 0.379592 | 0.111379 | 1.29369  | 0.121535 |
| PREP     | 1.34682  | 0.490736 | 3.696331 | 0.563246 |
| HACE1    | 0.612901 | 0.144925 | 2.592003 | 0.505791 |
| SEH1L    | 0.413005 | 0.176342 | 0.967285 | 0.041693 |
| WDR47    | 1.074589 | 0.232436 | 4.967996 | 0.926627 |
| WDFY1    | 0.900649 | 0.566479 | 1.431949 | 0.658264 |
| OVGP1    | 0.920729 | 0.231813 | 3.656998 | 0.906571 |
| SLC25A24 | 1.146817 | 0.526146 | 2.499662 | 0.7304   |
| MAP3K4   | 0.202704 | 0.058531 | 0.701999 | 0.011794 |
| PILRA    | 1.161002 | 0.876858 | 1.537223 | 0.297234 |
| IGSF9    | 0.775057 | 0.085815 | 7.000133 | 0.820471 |
| ABCB1    | 0.585154 | 0.346686 | 0.987652 | 0.044804 |
| ZNF213   | 1.097823 | 0.533362 | 2.259656 | 0.799963 |
| AKR1B1   | 1.443211 | 0.735774 | 2.830839 | 0.28583  |
| CPNE3    | 1.094212 | 0.791292 | 1.513093 | 0.586141 |
| RRN3     | 0.546421 | 0.259048 | 1.152588 | 0.112501 |
| CTTN     | 0.71952  | 0.307047 | 1.686094 | 0.44869  |
| WNT11    | 0.915935 | 0.107774 | 7.784201 | 0.935898 |
| MTIF2    | 0.115046 | 0.028367 | 0.466579 | 0.002469 |
| DDHD2    | 0.166447 | 0.044495 | 0.622638 | 0.007726 |
| TTC39A   | 9.381847 | 0.817001 | 107.7343 | 0.072229 |
| EPS15    | 0.6842   | 0.343949 | 1.361044 | 0.27947  |
| MGST2    | 1.338176 | 0.791587 | 2.262182 | 0.276825 |
| CHERP    | 2.028965 | 0.738624 | 5.573474 | 0.169962 |
| ATG16L1  | 0.877827 | 0.40363  | 1.909124 | 0.742372 |
| USP40    | 0.731375 | 0.044936 | 11.90373 | 0.826038 |
| POMGNT1  | 0.854641 | 0.416894 | 1.752032 | 0.668024 |
| RAD54L   | 0.465201 | 0.234155 | 0.924223 | 0.028893 |
| MAST2    | 0.863276 | 0.251363 | 2.964817 | 0.815339 |
| DNAJA1   | 0.501202 | 0.267057 | 0.940637 | 0.031516 |
| B4GALT1  | 0.966819 | 0.488754 | 1.912495 | 0.922763 |
| CHMP5    | 1.199301 | 0.622994 | 2.308726 | 0.586541 |
| NFX1     | 0.342371 | 0.081823 | 1.432581 | 0.142179 |
| IPO11    | 0.939961 | 0.586925 | 1.505347 | 0.796649 |
| EIF2AK1  | 0.378912 | 0.161212 | 0.890594 | 0.026034 |
| EPDR1    | 0.801435 | 0.551975 | 1.163636 | 0.244659 |
| SNX10    | 1.172797 | 0.852253 | 1.6139   | 0.327823 |
| SEPHS1   | 0.450151 | 0.173065 | 1.170865 | 0.101728 |
| MRPL28   | 2.060973 | 0.91442  | 4.645137 | 0.081126 |
| HBQ1     | 0.954083 | 0.771036 | 1.180586 | 0.665387 |
| ITPKC    | 6.210398 | 1.320543 | 29.20696 | 0.02078  |
| CEACAM6  | 1.032904 | 0.876769 | 1.216843 | 0.698629 |
| FAT2     | 0.35398  | 0.02728  | 4.593216 | 0.427115 |
| RBM22    | 0.891589 | 0.359347 | 2.212159 | 0.804524 |
| TMED2    | 0.638867 | 0.315329 | 1.294366 | 0.213596 |
| ZFAND6   | 2.755274 | 1.240995 | 6.117296 | 0.012755 |
| PPEF1    | 0.183626 | 0.010789 | 3.125269 | 0.241202 |
| LAT2     | 0.812987 | 0.538013 | 1.228498 | 0.325634 |
| HUWE1    | 1.464244 | 0.631096 | 3.397281 | 0.374517 |
| ZW10     | 0.333483 | 0.167325 | 0.664639 | 0.001803 |
| ALG9     | 0.334395 | 0.119713 | 0.934066 | 0.036608 |
| MYBPC2   | 1.942799 | 0.144434 | 26.13274 | 0.616495 |

|          |          |          |          |          |
|----------|----------|----------|----------|----------|
| ACOX3    | 1.246402 | 0.602741 | 2.577421 | 0.552379 |
| MTMR2    | 0.292765 | 0.067166 | 1.276116 | 0.101973 |
| PPP1R15A | 0.90288  | 0.622419 | 1.309714 | 0.590356 |
| HSD17B14 | 0.587175 | 0.117186 | 2.942117 | 0.517283 |
| TRIP6    | 1.349197 | 0.943928 | 1.928467 | 0.100312 |
| ACHE     | 1.469839 | 0.341057 | 6.334501 | 0.605337 |
| FTL      | 4.623586 | 1.349611 | 15.83979 | 0.014802 |
| BAX      | 0.849341 | 0.217599 | 3.31519  | 0.814194 |
| NLK      | 0.929487 | 0.531165 | 1.626512 | 0.797855 |
| PIGS     | 1.31565  | 0.503935 | 3.434839 | 0.575279 |
| ADAMTS2  | 3.167832 | 1.069043 | 9.387048 | 0.037487 |
| ATXN7L3  | 3.91146  | 1.489661 | 10.27047 | 0.005621 |
| PGS1     | 0.808055 | 0.273406 | 2.388219 | 0.699893 |
| PSMC5    | 0.318743 | 0.12033  | 0.844323 | 0.021424 |
| UIMC1    | 0.734352 | 0.507352 | 1.062918 | 0.101724 |
| CETP     | 0.823099 | 0.568741 | 1.191212 | 0.301964 |
| MMP2     | 1.129068 | 0.367932 | 3.464761 | 0.831954 |
| LPCAT2   | 0.928388 | 0.544323 | 1.583444 | 0.785027 |
| OGFOD1   | 0.46602  | 0.141999 | 1.529412 | 0.207946 |
| SH3BP2   | 3.708677 | 1.642836 | 8.372281 | 0.001606 |
| NOP14    | 0.345333 | 0.113322 | 1.052356 | 0.061456 |
| ADD1     | 1.730047 | 0.566326 | 5.285055 | 0.336026 |
| L2HGDH   | 0.515238 | 0.158537 | 1.674508 | 0.270154 |
| TXNDC16  | 0.639623 | 0.113327 | 3.610071 | 0.612785 |
| NID2     | 0.129125 | 0.012776 | 1.305066 | 0.082852 |
| GMCL1    | 0.361544 | 0.172016 | 0.759893 | 0.007264 |
| SF3B2    | 1.296565 | 0.508304 | 3.307231 | 0.586706 |
| GNAS     | 0.637672 | 0.030146 | 13.48848 | 0.772609 |
| DNM1L    | 0.56597  | 0.235547 | 1.359909 | 0.203145 |
| PHACTR3  | 0.79094  | 0.333552 | 1.875528 | 0.594457 |
| ERGIC2   | 1.385426 | 0.751476 | 2.55418  | 0.29624  |
| AURKA    | 0.876432 | 0.554529 | 1.3852   | 0.572241 |
| CASS4    | 9.101769 | 2.759015 | 30.026   | 0.000287 |
| PIR      | 0.54283  | 0.294667 | 0.99999  | 0.049996 |
| RFX2     | 1.194012 | 0.659248 | 2.162563 | 0.558475 |
| METTL2A  | 0.588693 | 0.144367 | 2.400549 | 0.459999 |
| SULT2B1  | 5.082091 | 0.179773 | 143.6678 | 0.340341 |
| ALG6     | 0.938308 | 0.411458 | 2.139762 | 0.879665 |
| CNOT3    | 2.34235  | 1.195259 | 4.590304 | 0.013154 |
| GP6      | 1.924939 | 0.615376 | 6.02134  | 0.260366 |
| PTPN4    | 0.730811 | 0.340091 | 1.57042  | 0.421676 |
| DDX18    | 0.411179 | 0.201846 | 0.837613 | 0.014362 |
| KHSRP    | 0.638538 | 0.293859 | 1.387503 | 0.257274 |
| GNA11    | 1.566102 | 0.983937 | 2.492718 | 0.058534 |
| EDEM2    | 0.780365 | 0.277546 | 2.194122 | 0.638228 |
| DNMT3B   | 1.235082 | 0.512185 | 2.978278 | 0.638254 |
| TPX2     | 0.759308 | 0.457706 | 1.259647 | 0.286348 |
| FER1L4   | 2.294772 | 0.177326 | 29.69664 | 0.524879 |
| PDRG1    | 0.683611 | 0.31132  | 1.501105 | 0.343234 |
| EPB41L1  | 120.732  | 2.335691 | 6240.642 | 0.017247 |
| DOCK9    | 1.148804 | 0.262101 | 5.03528  | 0.854022 |
| ANKRD10  | 0.42693  | 0.201777 | 0.903319 | 0.026023 |
| TGDS     | 0.766217 | 0.274143 | 2.141541 | 0.611598 |
| DOCK3    | 1.934132 | 1.000349 | 3.739562 | 0.049879 |
| COQ9     | 1.375803 | 0.475405 | 3.981518 | 0.55623  |
| TMEM40   | 0.103792 | 0.009728 | 1.107398 | 0.060723 |
| KIF9     | 4.162963 | 0.171032 | 101.3277 | 0.381193 |
| CRLS1    | 0.802308 | 0.364454 | 1.766198 | 0.584314 |



|          |          |          |          |          |
|----------|----------|----------|----------|----------|
| PPP1R13B | 1.313307 | 0.521465 | 3.307558 | 0.563039 |
| ATRN     | 2.713328 | 0.378179 | 19.46736 | 0.320804 |
| SMOX     | 0.994868 | 0.630166 | 1.570637 | 0.982381 |
| SIGLEC1  | 3.684121 | 0.765232 | 17.73677 | 0.103893 |
| FKBP1A   | 2.292864 | 0.976019 | 5.386395 | 0.056876 |
| NSFL1C   | 0.316181 | 0.138261 | 0.723055 | 0.006366 |
| SLC4A11  | 1.072469 | 0.375664 | 3.061754 | 0.895999 |
| ZNF343   | 0.748259 | 0.25694  | 2.179076 | 0.594893 |
| EBF4     | 0.270353 | 0.026538 | 2.754151 | 0.269378 |
| CPXM1    | 0.978769 | 0.724161 | 1.322896 | 0.888974 |
| XRN2     | 0.787955 | 0.261167 | 2.377305 | 0.672311 |
| DYNLL1   | 1.662005 | 0.892679 | 3.094348 | 0.109162 |
| TESC     | 0.870359 | 0.647969 | 1.169076 | 0.356368 |
| SNX5     | 0.543144 | 0.247562 | 1.191641 | 0.127859 |
| RPL6     | 0.223774 | 0.06373  | 0.785734 | 0.019478 |
| SIRPG    | 1.078012 | 0.32263  | 3.601986 | 0.902864 |
| MAPKAPK  | 0.083173 | 0.024634 | 0.280829 | 6.19E-05 |
| P2RX7    | 1.230536 | 0.762309 | 1.986358 | 0.395825 |
| ESF1     | 6.032405 | 0.510623 | 71.2657  | 0.153732 |
| RBBP9    | 0.37722  | 0.128135 | 1.110505 | 0.076777 |
| ANAPC5   | 0.216122 | 0.082018 | 0.569499 | 0.001943 |
| SLC23A2  | 0.235407 | 0.021214 | 2.612216 | 0.238805 |
| KDM2B    | 12.10742 | 1.324753 | 110.6542 | 0.027169 |
| TASP1    | 0.22867  | 0.08834  | 0.591917 | 0.002361 |
| OAS1     | 2.055826 | 1.198082 | 3.527655 | 0.008898 |
| RPLP0    | 1.127698 | 0.325969 | 3.901294 | 0.849479 |
| PXN      | 1.728904 | 0.82424  | 3.626501 | 0.147464 |
| SIRT4    | 2.122723 | 0.81646  | 5.518892 | 0.122586 |
| KIF16B   | 1.534223 | 0.802697 | 2.932413 | 0.195316 |
| TRMT6    | 0.676254 | 0.269782 | 1.695145 | 0.404096 |
| PEBP1    | 0.963127 | 0.484523 | 1.91449  | 0.914645 |
| BRAP     | 0.121798 | 0.013126 | 1.130208 | 0.063986 |
| ERP29    | 0.881614 | 0.382657 | 2.031174 | 0.767311 |
| FUS      | 0.378941 | 0.155347 | 0.924357 | 0.032937 |
| IGBP1    | 1.4937   | 0.638497 | 3.494363 | 0.354785 |
| FXD5     | 0.77798  | 0.333313 | 1.815871 | 0.561566 |
| ZNF302   | 0.625124 | 0.144211 | 2.709778 | 0.530124 |
| GRAMD1A  | 0.748824 | 0.411071 | 1.364091 | 0.344516 |
| CMTM1    | 0.169516 | 0.032345 | 0.888415 | 0.035733 |
| KCNH4    | 1.153638 | 0.215876 | 6.16503  | 0.867262 |
| GANAB    | 0.685467 | 0.343457 | 1.368045 | 0.284111 |
| GMIP     | 1.697079 | 0.936666 | 3.074816 | 0.081124 |
| RBM41    | 0.070651 | 0.003564 | 1.400422 | 0.08204  |
| BIRC5    | 0.686944 | 0.317235 | 1.487518 | 0.340805 |
| LAG3     | 1.288198 | 0.992409 | 1.672148 | 0.057078 |
| MLF2     | 2.153223 | 0.970147 | 4.779038 | 0.059368 |
| OTUB2    | 0.135624 | 0.004855 | 3.788901 | 0.239627 |
| DDX24    | 0.757208 | 0.39522  | 1.450746 | 0.401826 |
| ZBTB25   | 0.55935  | 0.182166 | 1.717511 | 0.310099 |
| NECAP1   | 0.508249 | 0.26684  | 0.968058 | 0.039522 |
| ARHGAP4  | 1.036496 | 0.51151  | 2.100296 | 0.920757 |
| ANKRD24  | 0.845587 | 0.09351  | 7.646448 | 0.881324 |
| DHX32    | 0.429095 | 0.247152 | 0.744977 | 0.002648 |
| RCOR1    | 0.74426  | 0.123285 | 4.49301  | 0.747459 |
| LTBP4    | 1.9875   | 1.154344 | 3.421992 | 0.013223 |
| BLVRB    | 0.968546 | 0.716543 | 1.309177 | 0.835341 |
| SLC9A1   | 1.243594 | 0.667219 | 2.317869 | 0.492561 |
| SPTLC1   | 0.742178 | 0.176968 | 3.112581 | 0.683541 |

|           |          |          |          |          |
|-----------|----------|----------|----------|----------|
| PAPOLA    | 0.692822 | 0.381865 | 1.256995 | 0.227268 |
| CCNK      | 3.138684 | 1.132397 | 8.699545 | 0.027877 |
| PCBP4     | 0.457097 | 0.027052 | 7.723454 | 0.587312 |
| RGS1      | 0.986491 | 0.777644 | 1.251426 | 0.910773 |
| YPEL3     | 1.852243 | 1.10985  | 3.091232 | 0.018334 |
| MRPS33    | 0.982002 | 0.598936 | 1.610068 | 0.942607 |
| NDUFB2    | 0.898739 | 0.33143  | 2.437113 | 0.833856 |
| NUDC      | 0.433811 | 0.206812 | 0.909968 | 0.027134 |
| MAEA      | 1.988637 | 0.917327 | 4.311084 | 0.081617 |
| ICAM1     | 2.09127  | 0.851906 | 5.133679 | 0.107363 |
| STRN4     | 3.554079 | 1.389324 | 9.091816 | 0.008143 |
| IRAK3     | 1.095841 | 0.731619 | 1.641385 | 0.657048 |
| LYZ       | 0.925216 | 0.738317 | 1.159428 | 0.499601 |
| MUL1      | 1.361987 | 0.51885  | 3.575235 | 0.530379 |
| TFAP4     | 1.873282 | 0.59168  | 5.930888 | 0.285754 |
| PDCD7     | 0.788087 | 0.252161 | 2.463033 | 0.682098 |
| SPG21     | 3.656594 | 0.716763 | 18.65425 | 0.118895 |
| DNAJB11   | 0.360283 | 0.181838 | 0.713842 | 0.003431 |
| FLT3LG    | 1.336198 | 0.864099 | 2.066227 | 0.192512 |
| RAB11FIP3 | 0.666374 | 0.371491 | 1.195329 | 0.173357 |
| GNPTG     | 0.247166 | 0.092555 | 0.660052 | 0.005289 |
| ZNF268    | 0.03143  | 0.000281 | 3.509975 | 0.150408 |
| GOLGA3    | 0.462641 | 0.215982 | 0.99099  | 0.047339 |
| PABPC4    | 0.532116 | 0.256483 | 1.10396  | 0.090199 |
| CD209     | 1.312166 | 0.38246  | 4.501854 | 0.665796 |
| MCOLN1    | 1.853438 | 1.122382 | 3.060663 | 0.015904 |
| USP48     | 0.327814 | 0.11045  | 0.972946 | 0.044497 |
| EFNB1     | 2.575839 | 1.414698 | 4.690008 | 0.001971 |
| PDPR      | 0.763307 | 0.337009 | 1.728849 | 0.517299 |
| GLG1      | 1.191677 | 0.713403 | 1.990593 | 0.502926 |
| KIF4A     | 0.719557 | 0.386111 | 1.340971 | 0.300099 |
| TNRC6A    | 0.338838 | 0.030856 | 3.720826 | 0.376039 |
| PLEKHG2   | 2.173562 | 0.882442 | 5.353748 | 0.091403 |
| DLL3      | 0.95839  | 0.283144 | 3.243975 | 0.945532 |
| NAT14     | 1.761046 | 1.141925 | 2.71584  | 0.010454 |
| PITPNM2   | 0.010765 | 0.000991 | 0.116987 | 0.000197 |
| EXOC1     | 1.03075  | 0.368357 | 2.884281 | 0.953997 |
| RBM27     | 0.705687 | 0.287563 | 1.731769 | 0.446629 |
| OSBPL8    | 1.264163 | 0.705001 | 2.266818 | 0.431428 |
| DTX2      | 3.840736 | 1.25684  | 11.73678 | 0.018223 |
| NLRC4     | 1.141465 | 0.688178 | 1.893321 | 0.608313 |
| PUS7      | 0.339558 | 0.165322 | 0.697423 | 0.003269 |
| NRCAM     | 0.565056 | 0.01726  | 18.49824 | 0.748428 |
| LAMB1     | 0.446956 | 0.016116 | 12.39583 | 0.634768 |
| DLD       | 0.542133 | 0.276593 | 1.062602 | 0.074567 |
| WDR7      | 1.375486 | 0.308328 | 6.136191 | 0.676058 |
| TXNL1     | 0.993567 | 0.586344 | 1.683611 | 0.980865 |
| IL5RA     | 0.755328 | 0.293175 | 1.946005 | 0.561152 |
| ABCC6     | 1.15437  | 0.074024 | 18.00175 | 0.918417 |
| CMTM6     | 0.920785 | 0.568914 | 1.490288 | 0.736918 |
| ITGA6     | 0.571195 | 0.148594 | 2.195679 | 0.41498  |
| RAPGEF4   | 0.499226 | 0.098815 | 2.52215  | 0.400583 |
| FH        | 0.88948  | 0.370158 | 2.137397 | 0.793454 |
| SEL1L3    | 1.307428 | 1.001066 | 1.707547 | 0.049093 |
| CDV3      | 0.446831 | 0.117571 | 1.698188 | 0.236978 |
| MYO15A    | 1.230937 | 0.173969 | 8.709626 | 0.83513  |
| ALKBH5    | 0.902317 | 0.281362 | 2.893693 | 0.862744 |
| NLRP1     | 1.57819  | 0.582582 | 4.275245 | 0.36952  |

|          |          |          |          |          |
|----------|----------|----------|----------|----------|
| PITPNM3  | 2.337337 | 0.103471 | 52.79897 | 0.593497 |
| SPAG7    | 0.449197 | 0.157392 | 1.282006 | 0.134737 |
| ZC3HC1   | 0.646198 | 0.263543 | 1.584457 | 0.339981 |
| ESR1     | 23.07545 | 2.082593 | 255.6795 | 0.010534 |
| ANGPT2   | 0.924507 | 0.282708 | 3.023308 | 0.896688 |
| TMEM101  | 1.750815 | 0.697225 | 4.396501 | 0.233163 |
| CD200    | 0.910555 | 0.36125  | 2.295118 | 0.842536 |
| CCDC80   | 0.016431 | 0.000323 | 0.835148 | 0.04038  |
| CMA1     | 0.270339 | 0.018131 | 4.030877 | 0.342709 |
| PSME1    | 0.480348 | 0.153355 | 1.504575 | 0.208137 |
| PPP2R3C  | 0.651363 | 0.309556 | 1.370589 | 0.258718 |
| HAUS4    | 0.685488 | 0.37703  | 1.246301 | 0.215686 |
| JPH4     | 1.01584  | 0.124473 | 8.290392 | 0.988294 |
| CEBPE    | 0.995027 | 0.730192 | 1.355916 | 0.974813 |
| SLC7A8   | 9.668575 | 0.271844 | 343.8787 | 0.213078 |
| OSGEP    | 0.24592  | 0.100464 | 0.601974 | 0.002132 |
| SLC22A17 | 2.187514 | 0.507786 | 9.423683 | 0.293495 |
| RNF31    | 1.229296 | 0.529813 | 2.852264 | 0.630708 |
| SCFD1    | 0.56837  | 0.117423 | 2.75113  | 0.482563 |
| HECTD1   | 0.845827 | 0.456935 | 1.565699 | 0.594066 |
| HNRNPC   | 0.450731 | 0.198769 | 1.022083 | 0.056433 |
| RPGRIP1  | 0.93236  | 0.365409 | 2.378968 | 0.883492 |
| SUPT16H  | 0.657274 | 0.397437 | 1.086988 | 0.102051 |
| TOX4     | 0.275154 | 0.085347 | 0.887078 | 0.030727 |
| TGM1     | 1.389972 | 0.375033 | 5.151598 | 0.62226  |
| TINF2    | 0.873978 | 0.353555 | 2.160451 | 0.770504 |
| TBL1Y    | 0.139618 | 0.005989 | 3.254601 | 0.220403 |
| SEMA6A   | 3.734103 | 0.801264 | 17.4019  | 0.093385 |
| TRPM7    | 0.994858 | 0.169397 | 5.842726 | 0.995446 |
| TYRO3    | 2.275797 | 0.72513  | 7.142514 | 0.158779 |
| WDR76    | 0.284127 | 0.073955 | 1.091579 | 0.066897 |
| CAPN3    | 0.59109  | 0.163701 | 2.134298 | 0.422186 |
| SNAP23   | 0.567323 | 0.270657 | 1.189163 | 0.133319 |
| PHGDH    | 1.186432 | 0.954563 | 1.474623 | 0.123357 |
| COL9A3   | 1.28691  | 0.314474 | 5.266371 | 0.725697 |
| EZR      | 0.726391 | 0.361067 | 1.461346 | 0.370092 |
| MYL6     | 1.175334 | 0.469439 | 2.942684 | 0.730089 |
| TEKT2    | 0.63417  | 0.113043 | 3.557688 | 0.604731 |
| CLSPN    | 0.331868 | 0.059944 | 1.837331 | 0.206492 |
| RFFL     | 1.049945 | 0.185589 | 5.939919 | 0.956041 |
| UNC13D   | 1.413434 | 0.742076 | 2.692172 | 0.292543 |
| MFSD11   | 0.844457 | 0.44204  | 1.613219 | 0.608716 |
| DPYSL2   | 1.327875 | 1.053345 | 1.673954 | 0.016406 |
| GPATCH2  | 0.791203 | 0.320513 | 1.953122 | 0.611468 |
| NUP50    | 0.38789  | 0.097585 | 1.541831 | 0.178614 |
| COMT     | 0.626834 | 0.295475 | 1.329793 | 0.22353  |
| VNN3     | 1.353683 | 0.725327 | 2.526387 | 0.341485 |
| ECHDC1   | 0.712537 | 0.338962 | 1.497834 | 0.371259 |
| LRRFIP2  | 0.440473 | 0.172051 | 1.127671 | 0.087368 |
| SEC22C   | 0.315745 | 0.081045 | 1.230112 | 0.096617 |
| XYLB     | 0.342967 | 0.051999 | 2.262083 | 0.266203 |
| HDAC6    | 0.462118 | 0.190056 | 1.123631 | 0.0886   |
| CDC6     | 0.334703 | 0.034557 | 3.241745 | 0.344779 |
| UPRT     | 0.297171 | 0.11881  | 0.743291 | 0.009481 |
| CDC23    | 0.43992  | 0.211426 | 0.915356 | 0.028053 |
| AAAS     | 1.780541 | 0.645018 | 4.915098 | 0.265454 |
| CBX5     | 0.897623 | 0.533276 | 1.510899 | 0.68435  |
| MSH2     | 0.472358 | 0.191041 | 1.167927 | 0.104403 |

|          |          |          |          |          |
|----------|----------|----------|----------|----------|
| MAP3K1   | 1.515304 | 0.956405 | 2.400809 | 0.076707 |
| DHPS     | 0.745803 | 0.29184  | 1.905916 | 0.540093 |
| HOOK2    | 1.015724 | 0.382001 | 2.700763 | 0.975055 |
| ARCN1    | 1.122307 | 0.567747 | 2.218544 | 0.739993 |
| TMEM38B  | 0.997986 | 0.403128 | 2.47062  | 0.996521 |
| PSMD5    | 0.612423 | 0.215639 | 1.739306 | 0.357213 |
| PTGS1    | 0.925822 | 0.543169 | 1.578049 | 0.776965 |
| NUP188   | 0.915277 | 0.382478 | 2.190274 | 0.842375 |
| CRAT     | 1.15322  | 0.173971 | 7.644465 | 0.88256  |
| SH2D3C   | 2.306204 | 1.110823 | 4.78796  | 0.024964 |
| NANS     | 2.109823 | 0.808618 | 5.504886 | 0.127053 |
| TBC1D2   | 1.679277 | 1.108958 | 2.542902 | 0.014346 |
| PDE6C    | 0.386648 | 0.010999 | 13.59121 | 0.600831 |
| CWF19L1  | 0.683615 | 0.235296 | 1.986138 | 0.484568 |
| SEMA4G   | 1.376333 | 0.419553 | 4.515029 | 0.598201 |
| BTAF1    | 0.623179 | 0.37617  | 1.032384 | 0.066325 |
| IKZF5    | 0.328804 | 0.108227 | 0.998933 | 0.04978  |
| BLNK     | 5.329296 | 1.534314 | 18.51082 | 0.008443 |
| SORBS1   | 0.454632 | 0.011056 | 18.69484 | 0.677626 |
| BAMBI    | 0.959786 | 0.745726 | 1.235291 | 0.749886 |
| IL11     | 0.546975 | 0.087713 | 3.410911 | 0.518225 |
| WAC      | 0.665249 | 0.273818 | 1.616243 | 0.368156 |
| CREM     | 0.736388 | 0.296599 | 1.828286 | 0.509567 |
| NUBP2    | 1.38491  | 0.713709 | 2.687337 | 0.335664 |
| TPSD1    | 0.331909 | 0.022918 | 4.806847 | 0.418681 |
| HIVEP1   | 1.302264 | 0.552316 | 3.070508 | 0.546185 |
| TREM2    | 2.864233 | 0.715193 | 11.47079 | 0.137157 |
| KCNK16   | 0.3932   | 0.018059 | 8.561194 | 0.552603 |
| CRISP3   | 1.151052 | 0.836186 | 1.584479 | 0.388271 |
| FKBP5    | 1.149057 | 0.734928 | 1.796545 | 0.542312 |
| SRPK1    | 0.474461 | 0.24952  | 0.902183 | 0.022971 |
| BRPF3    | 0.829371 | 0.354127 | 1.942399 | 0.666554 |
| MRPS18A  | 1.101521 | 0.457879 | 2.649931 | 0.829078 |
| TMEM14A  | 1.151957 | 0.774688 | 1.712952 | 0.484666 |
| EFHC1    | 0.261106 | 0.110398 | 0.617552 | 0.002233 |
| NCR2     | 1.129288 | 0.395449 | 3.22492  | 0.820342 |
| HSP90AB1 | 0.871994 | 0.51664  | 1.471765 | 0.608032 |
| MLN      | 15.41118 | 0.51601  | 460.2708 | 0.114521 |
| CDC5L    | 1.030795 | 0.392423 | 2.707637 | 0.950917 |
| ITPR3    | 1.183195 | 0.853844 | 1.639585 | 0.31218  |
| ZNF184   | 1.007673 | 0.418531 | 2.426119 | 0.986396 |
| SIRT1    | 1.129309 | 0.580728 | 2.196105 | 0.720067 |
| HNRNPH3  | 0.423136 | 0.219011 | 0.817513 | 0.010479 |
| IFT74    | 0.73184  | 0.355754 | 1.505508 | 0.396279 |
| JAK2     | 0.937242 | 0.535134 | 1.641497 | 0.820677 |
| IL12RB1  | 0.965387 | 0.459309 | 2.029072 | 0.925944 |
| ABL1     | 0.348286 | 0.12294  | 0.986685 | 0.047123 |
| ACOT7    | 4.800745 | 1.379857 | 16.70256 | 0.013659 |
| SH3GLB1  | 0.873061 | 0.398773 | 1.91145  | 0.734206 |
| CDC7     | 0.472873 | 0.255213 | 0.876163 | 0.017308 |
| SYDE2    | 0.190168 | 0.016366 | 2.209694 | 0.18471  |
| PCSK5    | 1.129503 | 0.620089 | 2.057408 | 0.690617 |
| SCD      | 1.197952 | 0.901657 | 1.591612 | 0.212811 |
| TMED1    | 0.698594 | 0.347681 | 1.403682 | 0.3137   |
| ABLIM1   | 1.178972 | 0.614659 | 2.261375 | 0.620292 |
| ERMP1    | 1.068677 | 0.617657 | 1.849035 | 0.812304 |
| RAB18    | 1.374427 | 0.541728 | 3.487084 | 0.503164 |
| NRP1     | 14.04479 | 1.387595 | 142.1569 | 0.025264 |

|          |          |          |          |          |
|----------|----------|----------|----------|----------|
| HSD17B7P | 0.332331 | 0.050721 | 2.177478 | 0.250718 |
| PRTFDC1  | 1.40963  | 0.666773 | 2.980107 | 0.368732 |
| TSPAN15  | 3.333858 | 0.490251 | 22.67128 | 0.218271 |
| MAST3    | 1.286012 | 0.83956  | 1.969873 | 0.247609 |
| MZF1     | 0.46578  | 0.189504 | 1.144836 | 0.095878 |
| OCEL1    | 1.670128 | 0.934894 | 2.983575 | 0.083175 |
| MYO9B    | 1.562212 | 0.675065 | 3.615219 | 0.297381 |
| KCNK6    | 2.714257 | 1.107307 | 6.653249 | 0.029051 |
| PSMD8    | 0.737047 | 0.28689  | 1.893546 | 0.526234 |
| FBXL19   | 0.197571 | 0.034668 | 1.125943 | 0.067795 |
| STX1B    | 1.057723 | 0.097494 | 11.47539 | 0.963203 |
| HSD3B7   | 0.863528 | 0.467044 | 1.596597 | 0.639844 |
| SETD1A   | 2.010178 | 0.984718 | 4.103528 | 0.055153 |
| BCL7C    | 4.411258 | 0.83879  | 23.19912 | 0.079705 |
| CIRBP    | 0.906053 | 0.505269 | 1.624742 | 0.740568 |
| PRKY     | 0.883995 | 0.611683 | 1.277536 | 0.511635 |
| IGFALS   | 0.353724 | 0.056517 | 2.213863 | 0.266728 |
| HNRNPM   | 0.71647  | 0.302348 | 1.69781  | 0.448785 |
| NDUFB7   | 1.482257 | 0.795718 | 2.761134 | 0.214975 |
| TECR     | 2.03276  | 0.981994 | 4.20788  | 0.056003 |
| TIMM13   | 4.641162 | 1.0979   | 19.61962 | 0.036893 |
| CDC34    | 1.599333 | 1.024381 | 2.496987 | 0.038834 |
| MTAP     | 0.265518 | 0.122813 | 0.574045 | 0.000749 |
| POLR2E   | 0.725976 | 0.271782 | 1.939204 | 0.522937 |
| POLRMT   | 1.510721 | 0.735183 | 3.10437  | 0.261529 |
| HCN2     | 1.058624 | 0.090013 | 12.45026 | 0.963866 |
| RASSF7   | 1.503453 | 0.749142 | 3.017281 | 0.251255 |
| GADD45B  | 1.337755 | 0.990348 | 1.807029 | 0.057862 |
| PALM     | 1.697771 | 1.075565 | 2.679919 | 0.023041 |
| MADCAM   | 1.097771 | 0.039295 | 30.66835 | 0.956215 |
| MKNK2    | 1.585858 | 0.837501 | 3.002917 | 0.156898 |
| ARVCF    | 2.777222 | 0.384677 | 20.05046 | 0.311179 |
| TRMT2A   | 0.420649 | 0.055262 | 3.201926 | 0.403042 |
| RANBP1   | 0.38647  | 0.175796 | 0.849617 | 0.018008 |
| ZDHHC8   | 1.130686 | 0.575965 | 2.219669 | 0.721177 |
| KLHL22   | 0.880374 | 0.383917 | 2.018816 | 0.763497 |
| MED15    | 2.706183 | 0.60716  | 12.06178 | 0.191689 |
| SERPIND1 | 1.227786 | 0.100547 | 14.99262 | 0.872304 |
| SNAP29   | 0.882101 | 0.367051 | 2.119875 | 0.779155 |
| CRKL     | 0.859059 | 0.326318 | 2.261546 | 0.758382 |
| LZTR1    | 1.224711 | 0.693092 | 2.164094 | 0.48526  |
| MMP11    | 1.78625  | 0.944861 | 3.376888 | 0.074195 |
| CECR2    | 0.025827 | 0.001199 | 0.556341 | 0.019579 |
| SMARCB1  | 1.399774 | 0.692461 | 2.829572 | 0.34899  |
| DERL3    | 1.313557 | 0.396552 | 4.351091 | 0.655362 |
| BCL2L13  | 1.086748 | 0.392705 | 3.007399 | 0.872736 |
| DDTL     | 1.240611 | 0.316936 | 4.856241 | 0.756822 |
| OSM      | 1.348988 | 1.046452 | 1.738991 | 0.020866 |
| CABIN1   | 1.297358 | 0.734189 | 2.292513 | 0.370133 |
| TBC1D10A | 2.683612 | 1.177105 | 6.118211 | 0.018887 |
| SUSD2    | 0.445496 | 0.089726 | 2.211906 | 0.322673 |
| SF3A1    | 0.31689  | 0.07429  | 1.35172  | 0.120482 |
| GGT5     | 1.072712 | 0.480791 | 2.393371 | 0.863891 |
| RNF215   | 0.64112  | 0.161397 | 2.546736 | 0.52761  |
| SEC14L2  | 0.140544 | 0.012357 | 1.598553 | 0.113693 |
| SEC14L3  | 0.395529 | 0.046772 | 3.344792 | 0.394484 |
| PPIL2    | 6.703772 | 0.435371 | 103.2235 | 0.172604 |
| UPB1     | 0.743128 | 0.313824 | 1.75971  | 0.499666 |

|         |          |          |          |          |
|---------|----------|----------|----------|----------|
| YPEL1   | 0.707741 | 0.386169 | 1.297095 | 0.263408 |
| SNRPD3  | 0.771225 | 0.425342 | 1.398375 | 0.392225 |
| PES1    | 0.490868 | 0.193966 | 1.242235 | 0.133076 |
| MAPK1   | 0.783454 | 0.308459 | 1.989893 | 0.607849 |
| GGT1    | 0.656191 | 0.221315 | 1.945582 | 0.447408 |
| PRODH   | 0.994981 | 0.757881 | 1.306256 | 0.971097 |
| PPM1F   | 1.094576 | 0.632846 | 1.893187 | 0.746495 |
| SLC35E4 | 6.999323 | 1.933042 | 25.34374 | 0.003038 |
| TOP3B   | 0.804934 | 0.362547 | 1.78713  | 0.593879 |
| CYTH4   | 1.498431 | 0.974582 | 2.303855 | 0.065379 |
| MFNG    | 0.804875 | 0.410924 | 1.576506 | 0.526837 |
| CARD10  | 1.219503 | 0.653317 | 2.276362 | 0.533174 |
| LRP5L   | 0.818075 | 0.542409 | 1.233841 | 0.338199 |
| SLC25A1 | 1.971846 | 1.135406 | 3.424481 | 0.015914 |
| LGALS2  | 1.138361 | 0.916815 | 1.413443 | 0.240597 |
| GGA1    | 0.069747 | 0.009034 | 0.53849  | 0.010664 |
| HIRA    | 0.514995 | 0.096792 | 2.740097 | 0.436523 |
| SH3BP1  | 1.620748 | 0.967051 | 2.716324 | 0.066832 |
| SEZ6L   | 2.745839 | 0.908123 | 8.302433 | 0.073575 |
| LGALS1  | 1.358953 | 0.950418 | 1.943096 | 0.09272  |
| HPS4    | 0.087865 | 0.017206 | 0.448693 | 0.003464 |
| PIK3IP1 | 1.165026 | 0.819573 | 1.656089 | 0.39467  |
| SRRD    | 0.846259 | 0.382944 | 1.870127 | 0.67989  |
| PATZ1   | 1.327076 | 0.394674 | 4.462243 | 0.647413 |
| TRIOBP  | 1.445728 | 0.571949 | 3.654399 | 0.435924 |
| TFIP11  | 0.461176 | 0.081855 | 2.598281 | 0.38024  |
| GCAT    | 1.56441  | 1.113768 | 2.197386 | 0.009836 |
| CRYBB1  | 0.394978 | 0.058991 | 2.644614 | 0.338309 |
| ANKRD54 | 0.991524 | 0.466005 | 2.109673 | 0.98237  |
| EIF3L   | 0.612997 | 0.24124  | 1.557642 | 0.303689 |
| MICALL1 | 2.36427  | 0.900323 | 6.208635 | 0.080671 |
| POLR2F  | 0.700708 | 0.316139 | 1.553089 | 0.381118 |
| SOX10   | 0.157012 | 0.023461 | 1.050787 | 0.056277 |
| CCDC134 | 1.784635 | 0.368682 | 8.638672 | 0.471613 |
| DEPDC5  | 0.3002   | 0.013853 | 6.505401 | 0.443238 |
| PICK1   | 1.27127  | 0.639776 | 2.526084 | 0.493284 |
| TTC28   | 2.482087 | 0.212184 | 29.03499 | 0.468767 |
| SLC16A8 | 0.368963 | 0.028358 | 4.800459 | 0.446274 |
| CENPM   | 0.683314 | 0.411849 | 1.133713 | 0.140444 |
| SLC5A4  | 0.221627 | 0.016868 | 2.911956 | 0.251542 |
| KDELR3  | 0.357693 | 0.03237  | 3.952601 | 0.401623 |
| CYP2D6  | 0.092973 | 0.006118 | 1.412841 | 0.087076 |
| DDX17   | 0.727667 | 0.351031 | 1.50841  | 0.392682 |
| DMC1    | 0.745092 | 0.22606  | 2.455818 | 0.628716 |
| TCF20   | 0.541623 | 0.067238 | 4.362919 | 0.564584 |
| HSCB    | 0.681156 | 0.327776 | 1.415517 | 0.303554 |
| CBY1    | 0.805087 | 0.184393 | 3.51512  | 0.773111 |
| TOMM22  | 0.440519 | 0.204588 | 0.948522 | 0.036169 |
| XBP1    | 0.701432 | 0.357925 | 1.374608 | 0.301561 |
| JOSD1   | 0.697962 | 0.364498 | 1.336497 | 0.277974 |
| FBXO7   | 0.58518  | 0.284062 | 1.205497 | 0.146187 |
| GTPBP1  | 2.783013 | 0.911343 | 8.498622 | 0.072339 |
| POLDIP3 | 0.543756 | 0.166418 | 1.776668 | 0.31319  |
| RAB36   | 2.159365 | 0.281783 | 16.54768 | 0.45875  |
| TIMP3   | 0.996209 | 0.145304 | 6.830025 | 0.996915 |
| SBF1    | 1.169515 | 0.626092 | 2.184609 | 0.623303 |
| CYB5R3  | 1.852748 | 0.836379 | 4.10421  | 0.128597 |
| DNAL4   | 1.115217 | 0.489562 | 2.540452 | 0.795168 |

|          |          |          |          |          |
|----------|----------|----------|----------|----------|
| LMF2     | 2.262304 | 1.039873 | 4.921775 | 0.039537 |
| RHBDD3   | 1.566691 | 0.690381 | 3.555311 | 0.282911 |
| PACSIN2  | 1.894797 | 0.714504 | 5.024823 | 0.199006 |
| TTLL1    | 2.635246 | 0.287153 | 24.18406 | 0.391587 |
| RASL10A  | 1.706607 | 1.030277 | 2.826916 | 0.037912 |
| AP1B1    | 1.957258 | 0.760784 | 5.035412 | 0.163656 |
| HMGXB4   | 0.46589  | 0.099651 | 2.178146 | 0.331717 |
| TOM1     | 1.858324 | 0.929582 | 3.714969 | 0.079541 |
| NEFH     | 0.687053 | 0.284793 | 1.657491 | 0.403514 |
| CHKB     | 1.066167 | 0.489469 | 2.322338 | 0.871854 |
| BIK      | 1.076172 | 0.842117 | 1.375278 | 0.557419 |
| HMOX1    | 1.302045 | 1.030213 | 1.645601 | 0.027168 |
| MCAT     | 1.272005 | 0.487161 | 3.321282 | 0.623193 |
| THOC5    | 0.304925 | 0.094605 | 0.982813 | 0.046702 |
| MCM5     | 0.864064 | 0.48962  | 1.524869 | 0.614154 |
| APOBEC3F | 0.778964 | 0.407368 | 1.489523 | 0.450106 |
| ARSA     | 2.022666 | 1.114493 | 3.670888 | 0.020535 |
| TSPO     | 1.772252 | 1.200031 | 2.617331 | 0.00402  |
| RASD2    | 0.482902 | 0.087445 | 2.666742 | 0.403753 |
| TTLL12   | 0.91941  | 0.564204 | 1.498243 | 0.735932 |
| CBX7     | 1.235753 | 0.822852 | 1.855843 | 0.30762  |
| PDGFB    | 0.417372 | 0.015793 | 11.03029 | 0.600964 |
| ACR      | 0.469637 | 0.064    | 3.446254 | 0.457339 |
| CABP7    | 1.600116 | 0.153694 | 16.65891 | 0.694135 |
| RPL3     | 0.357789 | 0.058668 | 2.181968 | 0.265203 |
| ZMAT5    | 3.372363 | 1.13569  | 10.01403 | 0.02859  |
| SYNGR1   | 0.629295 | 0.345419 | 1.146468 | 0.130192 |
| ASCC2    | 0.570742 | 0.262522 | 1.240836 | 0.156959 |
| MTMR3    | 0.925331 | 0.275593 | 3.106897 | 0.900068 |
| APOL4    | 3.558283 | 0.660657 | 19.16483 | 0.139553 |
| APOL1    | 0.011762 | 0.000388 | 0.357011 | 0.010727 |
| PNPLA3   | 33.34265 | 1.905502 | 583.4328 | 0.016329 |
| MYH9     | 1.453034 | 0.753934 | 2.800388 | 0.264334 |
| CACNA1I  | 1.092731 | 0.186983 | 6.385933 | 0.921573 |
| SAMM50   | 0.341286 | 0.168317 | 0.692007 | 0.002875 |
| TXN2     | 0.747031 | 0.24914  | 2.239926 | 0.602675 |
| FOXRED2  | 0.422388 | 0.142352 | 1.253311 | 0.120405 |
| GRAP2    | 1.1567   | 0.787222 | 1.699591 | 0.458432 |
| EIF3D    | 0.582279 | 0.300402 | 1.128651 | 0.109253 |
| TNRC6B   | 0.165179 | 0.035838 | 0.761311 | 0.020901 |
| SGSM3    | 1.610964 | 0.630208 | 4.118012 | 0.319358 |
| NCF4     | 0.895019 | 0.572293 | 1.399737 | 0.626898 |
| CSF2RB   | 0.340588 | 0.102234 | 1.134649 | 0.079392 |
| SLC25A17 | 0.231983 | 0.073253 | 0.734655 | 0.012982 |
| UPK3A    | 2.395192 | 0.493785 | 11.6183  | 0.278311 |
| FAM118A  | 0.926834 | 0.590359 | 1.455085 | 0.741276 |
| KCTD17   | 2.959618 | 0.978144 | 8.955067 | 0.054751 |
| ST13     | 0.563354 | 0.324502 | 0.978016 | 0.041455 |
| IL2RB    | 1.014001 | 0.752116 | 1.367074 | 0.927322 |
| RBX1     | 1.48517  | 0.757038 | 2.913631 | 0.249978 |
| EP300    | 2.026396 | 1.095781 | 3.747355 | 0.02435  |
| L3MBTL2  | 0.573209 | 0.158613 | 2.071514 | 0.395904 |
| CHADL    | 1.893855 | 0.38092  | 9.415864 | 0.43513  |
| RANGAP1  | 0.876312 | 0.43391  | 1.769772 | 0.712747 |
| ZC3H7B   | 0.340512 | 0.043843 | 2.644652 | 0.302978 |
| PHF5A    | 1.613006 | 0.774054 | 3.361252 | 0.201858 |
| ACO2     | 2.189259 | 0.920893 | 5.204575 | 0.076155 |
| POLR3H   | 0.262528 | 0.036137 | 1.907206 | 0.186223 |

|          |          |          |          |          |
|----------|----------|----------|----------|----------|
| TRMU     | 0.626239 | 0.253068 | 1.549679 | 0.311345 |
| PMM1     | 1.061398 | 0.726207 | 1.5513   | 0.758284 |
| CERK     | 0.351802 | 0.11676  | 1.059989 | 0.063391 |
| BRD1     | 2.21722  | 0.815047 | 6.031635 | 0.118893 |
| ZBED4    | 0.579127 | 0.260879 | 1.285609 | 0.179434 |
| MLC1     | 1.228396 | 0.611493 | 2.467658 | 0.563272 |
| HDAC10   | 0.856343 | 0.355881 | 2.060588 | 0.729218 |
| KCNK10   | 0.624234 | 0.008352 | 46.65659 | 0.830477 |
| ABHD4    | 1.914117 | 1.144282 | 3.201872 | 0.013383 |
| KHNYN    | 0.931582 | 0.436518 | 1.988108 | 0.85461  |
| FKBP3    | 0.742937 | 0.313331 | 1.761572 | 0.499948 |
| SDR39U1  | 0.465155 | 0.10094  | 2.14353  | 0.326168 |
| CTSG     | 1.003303 | 0.826495 | 1.217933 | 0.973408 |
| GZMH     | 0.95168  | 0.724617 | 1.249895 | 0.72176  |
| GZMB     | 0.969938 | 0.731978 | 1.285257 | 0.831692 |
| RBM23    | 2.452528 | 0.910783 | 6.604091 | 0.075888 |
| PRMT5    | 0.68537  | 0.332526 | 1.412617 | 0.305921 |
| COCH     | 0.845333 | 0.469438 | 1.522221 | 0.575558 |
| AP4S1    | 0.103854 | 0.007471 | 1.443683 | 0.091696 |
| POLE2    | 0.320171 | 0.171335 | 0.5983   | 0.000357 |
| SOS2     | 0.840213 | 0.241796 | 2.91964  | 0.784118 |
| CDKL1    | 0.264367 | 0.042277 | 1.653153 | 0.154884 |
| NIN      | 0.542346 | 0.208577 | 1.410219 | 0.209504 |
| PYGL     | 0.766469 | 0.458682 | 1.280789 | 0.30998  |
| TRIM9    | 1.28204  | 0.421351 | 3.90085  | 0.661662 |
| PSMC6    | 1.14405  | 0.587891 | 2.22635  | 0.691983 |
| GNPNAT1  | 1.567948 | 0.386195 | 6.36585  | 0.529262 |
| DDHD1    | 0.947301 | 0.086742 | 10.34537 | 0.964598 |
| CDKN3    | 1.007328 | 0.673191 | 1.507313 | 0.971676 |
| CGRRF1   | 1.113903 | 0.528848 | 2.346195 | 0.776552 |
| ATP6V1D  | 1.037837 | 0.557339 | 1.932586 | 0.906798 |
| PLEK2    | 1.348871 | 0.744883 | 2.442605 | 0.323249 |
| PIGH     | 0.592341 | 0.197264 | 1.778671 | 0.35058  |
| PSMA3    | 1.042327 | 0.503656 | 2.157118 | 0.911049 |
| VTI1B    | 1.025049 | 0.448883 | 2.340753 | 0.953173 |
| TIMM9    | 0.62749  | 0.264469 | 1.488812 | 0.290436 |
| GSTZ1    | 0.132148 | 0.020956 | 0.833339 | 0.03124  |
| KIAA0586 | 0.184618 | 0.061824 | 0.551306 | 0.002472 |
| TMED8    | 0.061514 | 0.003559 | 1.063162 | 0.055131 |
| AHSA1    | 0.600436 | 0.243008 | 1.483585 | 0.269046 |
| DAAM1    | 0.956103 | 0.547103 | 1.670863 | 0.874766 |
| SPTLC2   | 0.881324 | 0.495245 | 1.56838  | 0.667496 |
| RIN3     | 1.851779 | 1.012007 | 3.388403 | 0.045643 |
| LG MN    | 2.052723 | 1.086206 | 3.879255 | 0.026787 |
| ALKBH1   | 1.818061 | 0.355587 | 9.295479 | 0.472755 |
| SNW1     | 0.391577 | 0.149124 | 1.02822  | 0.05698  |
| CHGA     | 2.815356 | 0.398541 | 19.8881  | 0.29941  |
| ITPK1    | 2.08928  | 1.281543 | 3.406122 | 0.003129 |
| DHRS7    | 0.470256 | 0.232812 | 0.94987  | 0.035436 |
| PPM1A    | 0.324073 | 0.080094 | 1.311244 | 0.114108 |
| ASB2     | 0.474637 | 0.070876 | 3.178503 | 0.442445 |
| ERH      | 0.594453 | 0.332181 | 1.063802 | 0.079832 |
| HIF1A    | 0.933636 | 0.538584 | 1.61846  | 0.806735 |
| SLC10A1  | 2.751732 | 0.387588 | 19.53629 | 0.311448 |
| EIF5     | 0.367709 | 0.160747 | 0.841134 | 0.0178   |
| SLC8A3   | 1.28034  | 0.352182 | 4.654611 | 0.707469 |
| DICER1   | 1.177291 | 0.322107 | 4.302965 | 0.805049 |
| ZFYVE21  | 1.472142 | 0.854592 | 2.535952 | 0.163413 |



|          |          |          |          |          |
|----------|----------|----------|----------|----------|
| MTHFD1   | 0.277908 | 0.106573 | 0.724693 | 0.008833 |
| TCL1A    | 1.553851 | 0.740066 | 3.262481 | 0.24419  |
| ZC3H14   | 0.055121 | 0.004049 | 0.750383 | 0.029591 |
| VRK1     | 0.375302 | 0.153844 | 0.915552 | 0.031251 |
| PSMC1    | 0.502735 | 0.25982  | 0.972759 | 0.041154 |
| PAPLN    | 1.26983  | 0.70557  | 2.285343 | 0.42559  |
| RPS6KA5  | 0.411958 | 0.122082 | 1.390128 | 0.152964 |
| PSMB5    | 1.011847 | 0.560212 | 1.827583 | 0.968857 |
| YY1      | 0.737343 | 0.277754 | 1.957398 | 0.540742 |
| ACIN1    | 1.469638 | 0.539416 | 4.004027 | 0.451511 |
| CCNB1IP1 | 0.503371 | 0.246052 | 1.02979  | 0.060165 |
| TRIP11   | 0.443313 | 0.218015 | 0.901437 | 0.02467  |
| APEX1    | 0.870111 | 0.517867 | 1.461944 | 0.599214 |
| PABPN1   | 0.765749 | 0.381803 | 1.535796 | 0.452258 |
| ARHGAP5  | 0.897414 | 0.6957   | 1.157614 | 0.404709 |
| CINP     | 1.768379 | 0.665894 | 4.696193 | 0.252635 |
| SRP54    | 0.83993  | 0.353254 | 1.997095 | 0.69304  |
| CHD8     | 0.517188 | 0.201237 | 1.3292   | 0.170978 |
| PCK2     | 1.987686 | 0.695697 | 5.67905  | 0.199649 |
| PSMA6    | 0.910432 | 0.444587 | 1.864393 | 0.797496 |
| NFKBIA   | 1.011712 | 0.715729 | 1.430097 | 0.947425 |
| PSME2    | 1.118538 | 0.607615 | 2.059079 | 0.719001 |
| BRMS1L   | 0.379339 | 0.060413 | 2.3819   | 0.301097 |
| REC8     | 1.724467 | 1.022567 | 2.908157 | 0.040987 |
| TM9SF1   | 2.498568 | 0.610803 | 10.2207  | 0.20264  |
| SEC23A   | 1.341021 | 0.347526 | 5.174686 | 0.67018  |
| GMPR2    | 0.549675 | 0.185152 | 1.631857 | 0.281085 |
| PNN      | 0.579821 | 0.402435 | 0.835395 | 0.003442 |
| RABGGTA  | 0.883834 | 0.19232  | 4.061787 | 0.873909 |
| NFATC4   | 0.671954 | 0.106647 | 4.233808 | 0.672053 |
| PLTP     | 1.004429 | 0.622452 | 1.620811 | 0.985559 |
| PCIF1    | 1.730473 | 0.832657 | 3.596363 | 0.141752 |
| GSS      | 1.114637 | 0.395393 | 3.142234 | 0.837384 |
| MMP9     | 0.932502 | 0.792458 | 1.097294 | 0.39996  |
| TRPC4AP  | 1.335144 | 0.442647 | 4.02716  | 0.607861 |
| PYGB     | 2.109973 | 1.177917 | 3.779544 | 0.012055 |
| ABHD12   | 4.18497  | 1.314772 | 13.32092 | 0.015384 |
| PROCR    | 6.33049  | 1.669187 | 24.00876 | 0.006663 |
| GINS1    | 1.876319 | 0.233044 | 15.10692 | 0.554297 |
| NINL     | 1.330599 | 0.184654 | 9.58815  | 0.776817 |
| CD40     | 4.852527 | 1.382903 | 17.02724 | 0.013658 |
| ZMYND8   | 0.726765 | 0.329872 | 1.601185 | 0.428413 |
| SGK2     | 9.674879 | 0.05176  | 1808.404 | 0.395098 |
| IFT52    | 0.338843 | 0.113531 | 1.011307 | 0.052403 |
| MYBL2    | 1.820302 | 0.363252 | 9.121773 | 0.466335 |
| NDRG3    | 0.718516 | 0.238207 | 2.167303 | 0.557312 |
| SLA2     | 0.727876 | 0.344322 | 1.538685 | 0.405607 |
| NFATC2   | 0.121113 | 0.002695 | 5.442122 | 0.276887 |
| PABPC1L  | 0.674643 | 0.449873 | 1.011713 | 0.056957 |
| STK4     | 0.820849 | 0.41785  | 1.612524 | 0.566616 |
| SALL4    | 0.974781 | 0.395647 | 2.401632 | 0.955724 |
| ADNP     | 0.919101 | 0.308255 | 2.740419 | 0.879703 |
| PFDN4    | 0.745725 | 0.285854 | 1.945415 | 0.548697 |
| DOK5     | 1.04061  | 0.125871 | 8.603003 | 0.970536 |
| CSTF1    | 0.668717 | 0.02636  | 16.96455 | 0.807303 |
| RAE1     | 0.344188 | 0.058139 | 2.037611 | 0.239797 |
| TPD52L2  | 1.651746 | 0.588485 | 4.636079 | 0.340569 |
| DNAJC5   | 1.407939 | 0.667227 | 2.970938 | 0.369205 |

|          |          |          |          |          |
|----------|----------|----------|----------|----------|
| CTSZ     | 1.257491 | 0.908979 | 1.739626 | 0.166467 |
| PRPF6    | 1.419684 | 0.553983 | 3.638203 | 0.465476 |
| TUBB1    | 1.004722 | 0.811515 | 1.243929 | 0.965515 |
| PSMA7    | 0.418489 | 0.149686 | 1.170002 | 0.096783 |
| SLCO4A1  | 1.841039 | 0.809599 | 4.186547 | 0.145375 |
| NTSR1    | 1.4847   | 0.927825 | 2.375808 | 0.099424 |
| TCFL5    | 0.938234 | 0.444146 | 1.981968 | 0.867298 |
| DIDO1    | 0.367981 | 0.128537 | 1.053472 | 0.062477 |
| SLC17A9  | 0.836951 | 0.505987 | 1.384399 | 0.488189 |
| BIRC7    | 1.384795 | 0.017826 | 107.5785 | 0.883453 |
| ARFGAP1  | 1.386258 | 0.67244  | 2.857818 | 0.376242 |
| AVP      | 2.025004 | 1.244581 | 3.294796 | 0.004498 |
| COL20A1  | 5.863553 | 1.350355 | 25.4609  | 0.018231 |
| EEF1A2   | 1.220585 | 0.85916  | 1.734052 | 0.265865 |
| PTK6     | 0.887391 | 0.214962 | 3.663268 | 0.868825 |
| GMEB2    | 1.735923 | 0.837791 | 3.596873 | 0.137858 |
| CDC25B   | 1.780972 | 0.843305 | 3.761228 | 0.130241 |
| ISM1     | 14.58383 | 0.845174 | 251.6502 | 0.065153 |
| RNF24    | 0.734525 | 0.408892 | 1.319484 | 0.301917 |
| ARFRP1   | 0.846274 | 0.229601 | 3.119234 | 0.801984 |
| TRIB3    | 1.416513 | 0.955931 | 2.099011 | 0.082679 |
| RASSF2   | 1.405739 | 0.489644 | 4.035794 | 0.526793 |
| CSNK2A1  | 0.482772 | 0.176684 | 1.319125 | 0.155633 |
| CDS2     | 1.103195 | 0.378552 | 3.214981 | 0.857183 |
| HM13     | 5.032736 | 1.038974 | 24.37831 | 0.044701 |
| SNPH     | 0.834859 | 0.165495 | 4.211545 | 0.826965 |
| MYLK2    | 1.006785 | 0.190745 | 5.313968 | 0.993644 |
| SIRPB1   | 1.114023 | 0.703064 | 1.765196 | 0.645671 |
| SEC23B   | 1.417414 | 0.632225 | 3.177761 | 0.397076 |
| FERMT1   | 0.641494 | 0.253053 | 1.626198 | 0.349567 |
| PLCB4    | 0.616653 | 0.018357 | 20.71533 | 0.78745  |
| MYL9     | 1.173783 | 0.737692 | 1.867672 | 0.498941 |
| HCK      | 1.16558  | 0.881828 | 1.540637 | 0.28173  |
| TM9SF4   | 1.655699 | 0.721631 | 3.798813 | 0.234043 |
| CRNKL1   | 0.831823 | 0.299112 | 2.313283 | 0.724199 |
| POFUT1   | 0.339541 | 0.034165 | 3.37442  | 0.356572 |
| SAMHD1   | 1.396702 | 0.828142 | 2.355606 | 0.210256 |
| KIF3B    | 1.721183 | 0.67417  | 4.394249 | 0.256167 |
| NOP56    | 0.353034 | 0.163861 | 0.760602 | 0.007844 |
| MANBAL   | 3.844553 | 1.326582 | 11.14186 | 0.013119 |
| IDH3B    | 1.115033 | 0.175108 | 7.100171 | 0.908224 |
| MAPRE1   | 0.328734 | 0.150541 | 0.717851 | 0.005241 |
| JAG1     | 1.080545 | 0.718738 | 1.624484 | 0.709607 |
| CDK5RAP1 | 0.05003  | 0.008469 | 0.295545 | 0.00095  |
| SNTA1    | 1.385417 | 0.535487 | 3.584365 | 0.501476 |
| OXT      | 2.383386 | 1.023016 | 5.552728 | 0.044147 |
| E2F1     | 1.028411 | 0.429987 | 2.459678 | 0.949792 |
| RPRD1B   | 1.212025 | 0.357518 | 4.108898 | 0.757546 |
| PXMP4    | 2.518741 | 0.277657 | 22.84853 | 0.411614 |
| CHMP4B   | 1.13117  | 0.473594 | 2.701779 | 0.781428 |
| BPI      | 1.004224 | 0.856355 | 1.177627 | 0.958632 |
| CST3     | 1.561077 | 1.082336 | 2.251577 | 0.017155 |
| ASIP     | 3.261639 | 0.773833 | 13.74753 | 0.107256 |
| ACTR5    | 0.389473 | 0.144629 | 1.048818 | 0.062089 |
| AHCY     | 1.083408 | 0.621281 | 1.88928  | 0.777668 |
| PPP1R16B | 1.312693 | 0.927525 | 1.857809 | 0.124686 |
| FAM83D   | 0.738748 | 0.431383 | 1.265112 | 0.269942 |
| DHX35    | 0.465168 | 0.191789 | 1.128225 | 0.09044  |

|          |          |          |          |          |
|----------|----------|----------|----------|----------|
| DNTTIP1  | 2.109884 | 0.852704 | 5.220585 | 0.106258 |
| MAP1LC3/ | 0.907071 | 0.494467 | 1.663971 | 0.752712 |
| PIGU     | 0.677991 | 0.381902 | 1.203639 | 0.184495 |
| TNNC2    | 0.738682 | 0.272328 | 2.003649 | 0.551894 |
| ACOT8    | 1.114799 | 0.500563 | 2.482754 | 0.790228 |
| ZNF516   | 0.487154 | 0.096175 | 2.467563 | 0.384953 |
| ADNP2    | 0.517636 | 0.265036 | 1.010983 | 0.053857 |
| USP14    | 0.306256 | 0.133602 | 0.702028 | 0.005177 |
| VAPA     | 0.239506 | 0.061984 | 0.925454 | 0.038238 |
| METTL4   | 0.332125 | 0.093393 | 1.181101 | 0.088601 |
| LPIN2    | 1.193349 | 0.518399 | 2.747075 | 0.677761 |
| SMCHD1   | 0.942379 | 0.225166 | 3.944115 | 0.935241 |
| MYOM1    | 0.661868 | 0.339128 | 1.29175  | 0.226425 |
| MYL12A   | 0.797028 | 0.442339 | 1.436124 | 0.450153 |
| CEP76    | 0.85543  | 0.11223  | 6.520195 | 0.880224 |
| CEP192   | 0.212655 | 0.058848 | 0.768458 | 0.018188 |
| RNMT     | 0.548252 | 0.251969 | 1.192925 | 0.129716 |
| SMAD7    | 0.5212   | 0.252275 | 1.076799 | 0.078391 |
| RNF125   | 0.822321 | 0.404365 | 1.672279 | 0.589082 |
| ANKRD12  | 0.703283 | 0.341319 | 1.449106 | 0.339935 |
| POLI     | 0.443426 | 0.108318 | 1.81528  | 0.258119 |
| MIB1     | 0.768631 | 0.347531 | 1.699972 | 0.515845 |
| RBBP8    | 0.167376 | 0.041602 | 0.673404 | 0.011847 |
| RIOK3    | 0.806115 | 0.416474 | 1.560293 | 0.522397 |
| CSTF2    | 0.567171 | 0.20632  | 1.55914  | 0.271706 |
| VSIG1    | 1.418931 | 0.157237 | 12.80468 | 0.755238 |
| PSMD10   | 0.645437 | 0.318202 | 1.309194 | 0.224998 |
| ATG4A    | 0.516822 | 0.13585  | 1.966169 | 0.332932 |
| STS      | 0.91724  | 0.234088 | 3.594066 | 0.901332 |
| TBL1X    | 1.345992 | 0.885653 | 2.045605 | 0.164119 |
| GPR143   | 4.462994 | 0.535221 | 37.21512 | 0.166874 |
| PGRMC1   | 0.772641 | 0.453705 | 1.315777 | 0.342299 |
| POLA1    | 0.293104 | 0.148695 | 0.577761 | 0.000394 |
| MID1     | 0.037295 | 0.000352 | 3.952845 | 0.16688  |
| NKAP     | 0.461475 | 0.134444 | 1.584005 | 0.219075 |
| RHOXF1   | 2.414884 | 0.491555 | 11.86371 | 0.277681 |
| NXT2     | 0.849407 | 0.52849  | 1.365197 | 0.500211 |
| ALG13    | 0.81669  | 0.373476 | 1.785874 | 0.61197  |
| PRPS2    | 0.490127 | 0.245447 | 0.978724 | 0.043289 |
| TLR8     | 1.430024 | 1.00057  | 2.043803 | 0.049635 |
| MOSPD1   | 1.057578 | 0.476483 | 2.34735  | 0.890544 |
| AMMECR1  | 0.694154 | 0.296156 | 1.627014 | 0.400916 |
| CHRD1    | 3.563907 | 0.100942 | 125.8295 | 0.484631 |
| WDR13    | 1.658102 | 0.749367 | 3.668832 | 0.212059 |
| SUV39H1  | 0.405374 | 0.190361 | 0.863241 | 0.019217 |
| SRPX     | 0.487015 | 0.047517 | 4.991514 | 0.544562 |
| XIAP     | 1.076419 | 0.294576 | 3.933373 | 0.911316 |
| STAG2    | 0.528319 | 0.147446 | 1.893047 | 0.327146 |
| ATP11C   | 1.495168 | 0.38415  | 5.819411 | 0.561828 |
| MCF2     | 0.205768 | 0.023382 | 1.810785 | 0.154201 |
| ABCD1    | 1.611168 | 0.997867 | 2.60141  | 0.05103  |
| CCDC22   | 1.332363 | 0.649311 | 2.733964 | 0.433953 |
| CACNA1F  | 1.493798 | 0.624378 | 3.573848 | 0.367213 |
| SYP      | 5.198345 | 0.383484 | 70.46646 | 0.215222 |
| PLP2     | 1.195082 | 0.564068 | 2.532004 | 0.641764 |
| BMX      | 0.878567 | 0.219605 | 3.514851 | 0.854787 |
| PLS3     | 0.947281 | 0.375625 | 2.388931 | 0.908638 |
| RENBP    | 1.788854 | 1.1002   | 2.908561 | 0.019027 |

|          |          |          |          |          |
|----------|----------|----------|----------|----------|
| ELF4     | 1.195909 | 0.569802 | 2.509992 | 0.636231 |
| SMARCA1  | 3.408098 | 0.875542 | 13.26623 | 0.077013 |
| MTMR8    | 5.472746 | 0.118489 | 252.7744 | 0.384722 |
| ASB9     | 0.751082 | 0.473222 | 1.192091 | 0.22457  |
| ZC3H12B  | 1.534526 | 0.682657 | 3.449423 | 0.300113 |
| RBBP7    | 0.340417 | 0.141305 | 0.820101 | 0.016303 |
| KCND1    | 1.414578 | 0.256058 | 7.814759 | 0.690837 |
| SLC25A14 | 0.106941 | 0.022932 | 0.498703 | 0.004433 |
| FMR1     | 0.046715 | 0.003833 | 0.569326 | 0.016327 |
| PIM2     | 0.892921 | 0.566327 | 1.407858 | 0.62589  |
| SCML2    | 0.494919 | 0.223104 | 1.097897 | 0.083592 |
| SLC35A2  | 0.979029 | 0.149908 | 6.393881 | 0.982339 |
| PQBP1    | 1.300446 | 0.358551 | 4.716651 | 0.689419 |
| PCSK1N   | 2.452429 | 0.899048 | 6.689754 | 0.079754 |
| EMD      | 0.612772 | 0.260251 | 1.442797 | 0.262312 |
| TAZ      | 1.490425 | 0.47347  | 4.691669 | 0.495196 |
| PGK1     | 0.732228 | 0.296526 | 1.808132 | 0.4992   |
| GATA1    | 0.723916 | 0.484746 | 1.081092 | 0.114356 |
| MAGT1    | 0.830701 | 0.491273 | 1.404645 | 0.488869 |
| SMS      | 0.78761  | 0.350039 | 1.772171 | 0.56392  |
| PHEX     | 10.10486 | 1.077168 | 94.79311 | 0.042863 |
| UBL4A    | 0.7817   | 0.419777 | 1.455666 | 0.437529 |
| CD99L2   | 0.74872  | 0.382735 | 1.464675 | 0.397962 |
| EEA1     | 0.313772 | 0.066445 | 1.481718 | 0.143331 |
| RP2      | 1.272156 | 0.709328 | 2.28157  | 0.419292 |
| USP11    | 0.670097 | 0.385244 | 1.165571 | 0.156342 |
| PCYT1B   | 3.312204 | 0.298321 | 36.77485 | 0.329507 |
| HTATSF1  | 4.747819 | 0.224612 | 100.3586 | 0.317002 |
| CD40LG   | 0.56975  | 0.121513 | 2.671436 | 0.475492 |
| TIMP1    | 1.431444 | 0.895736 | 2.287538 | 0.133715 |
| GABRE    | 0.230658 | 0.003551 | 14.98062 | 0.490926 |
| FGD1     | 0.454034 | 0.027694 | 7.443744 | 0.580058 |
| PIN4     | 1.773399 | 0.489417 | 6.425899 | 0.383118 |
| PORCN    | 4.534092 | 0.694719 | 29.59183 | 0.114247 |
| MAGED2   | 0.680052 | 0.137302 | 3.368274 | 0.636686 |
| RBM3     | 0.557435 | 0.191148 | 1.625618 | 0.284534 |
| KLF8     | 0.146074 | 0.00934  | 2.284579 | 0.170345 |
| SYTL4    | 1.741542 | 1.242997 | 2.440045 | 0.001263 |
| ZDHHC15  | 2.310064 | 0.457597 | 11.66179 | 0.310783 |
| CENPI    | 0.350832 | 0.028371 | 4.338367 | 0.414326 |
| GLA      | 0.392413 | 0.200448 | 0.768219 | 0.006347 |
| ARMCX3   | 0.453186 | 0.11308  | 1.816208 | 0.263811 |
| BEX4     | 1.114756 | 0.805207 | 1.543308 | 0.512752 |
| NDFIP2   | 0.515493 | 0.287731 | 0.923549 | 0.025928 |
| TNFSF13B | 1.353113 | 0.950832 | 1.925591 | 0.092979 |
| FNDC3A   | 0.408921 | 0.164972 | 1.013606 | 0.05351  |
| MLNR     | 0.022454 | 0.000649 | 0.777026 | 0.035774 |
| CDADC1   | 0.503291 | 0.095193 | 2.660945 | 0.419039 |
| CAB39L   | 2.646328 | 0.120467 | 58.13264 | 0.536994 |
| KLF5     | 1.032606 | 0.527057 | 2.023071 | 0.925501 |
| STK24    | 0.889178 | 0.178571 | 4.427588 | 0.885968 |
| ACP5     | 1.3227   | 0.771691 | 2.267145 | 0.309024 |
| DNAJC3   | 0.82472  | 0.391742 | 1.736256 | 0.611896 |
| ARHGEF7  | 0.331253 | 0.047409 | 2.314503 | 0.265319 |
| FGF9     | 0.481053 | 0.140974 | 1.641524 | 0.242593 |
| PARP4    | 0.610613 | 0.360679 | 1.033741 | 0.066295 |
| MRPS31   | 0.395237 | 0.172678 | 0.904648 | 0.028009 |
| SLC25A15 | 0.359446 | 0.15322  | 0.843246 | 0.01868  |

|          |          |          |          |          |
|----------|----------|----------|----------|----------|
| KPNA3    | 0.903594 | 0.461401 | 1.769571 | 0.767519 |
| FLT1     | 0.358933 | 0.026019 | 4.951544 | 0.444132 |
| DGKH     | 0.252552 | 0.011396 | 5.596841 | 0.384014 |
| KATNAL1  | 0.115736 | 0.030439 | 0.440051 | 0.001553 |
| INTS6    | 0.689467 | 0.226614 | 2.097689 | 0.512476 |
| DHRS12   | 3.864795 | 0.544814 | 27.41605 | 0.17624  |
| TSC22D1  | 1.046738 | 0.714143 | 1.53423  | 0.814868 |
| CLN5     | 1.350489 | 0.603233 | 3.023411 | 0.464948 |
| OLFM4    | 0.839659 | 0.59239  | 1.190141 | 0.326142 |
| MSLN     | 0.835957 | 0.419987 | 1.663915 | 0.609926 |
| MGRN1    | 1.866165 | 1.064802 | 3.270629 | 0.02931  |
| ZNF629   | 1.545744 | 0.653863 | 3.654167 | 0.321144 |
| TRADD    | 2.386679 | 1.051455 | 5.417479 | 0.037532 |
| HSF4     | 2.800178 | 0.34929  | 22.44837 | 0.332273 |
| CORO1A   | 1.625988 | 1.02299  | 2.58442  | 0.039773 |
| MAPK3    | 2.062288 | 1.124773 | 3.781235 | 0.019278 |
| GDPD3    | 1.140626 | 0.214239 | 6.072788 | 0.877439 |
| ELMO3    | 1.219679 | 0.449367 | 3.310475 | 0.696679 |
| PHKB     | 0.43581  | 0.166505 | 1.140687 | 0.090678 |
| LYRM1    | 0.79315  | 0.45378  | 1.386327 | 0.415984 |
| NUTF2    | 0.365035 | 0.13651  | 0.976124 | 0.044631 |
| NUP93    | 1.364209 | 0.513832 | 3.621936 | 0.533017 |
| CENPT    | 0.908306 | 0.384126 | 2.147788 | 0.826629 |
| TSNAXIP1 | 0.573758 | 0.114027 | 2.887011 | 0.500381 |
| NFAT5    | 0.211454 | 0.040149 | 1.113672 | 0.066809 |
| LONP2    | 0.288127 | 0.10024  | 0.828185 | 0.020893 |
| N4BP1    | 2.578203 | 0.488448 | 13.60868 | 0.264506 |
| ARL2BP   | 0.771632 | 0.330429 | 1.801945 | 0.549097 |
| PLLP     | 1.021042 | 0.109873 | 9.488425 | 0.985393 |
| CCL22    | 0.105235 | 0.007696 | 1.438903 | 0.09155  |
| DHODH    | 0.324242 | 0.04993  | 2.10559  | 0.238038 |
| CCL17    | 0.25632  | 0.018973 | 3.462823 | 0.305425 |
| CTCF     | 1.325485 | 0.513911 | 3.418708 | 0.559969 |
| ACD      | 0.591614 | 0.262654 | 1.332582 | 0.205174 |
| POLR2C   | 4.735417 | 1.247264 | 17.97869 | 0.022338 |
| PARD6A   | 1.752267 | 0.952306 | 3.224216 | 0.071406 |
| ZNF821   | 1.580643 | 0.4941   | 5.056537 | 0.440311 |
| MMP15    | 0.888211 | 0.279991 | 2.817656 | 0.840494 |
| CYB5B    | 0.528365 | 0.243383 | 1.147041 | 0.106725 |
| NME3     | 2.262933 | 1.24612  | 4.109449 | 0.007301 |
| NDRG4    | 0.015464 | 9.57E-05 | 2.498405 | 0.108048 |
| PSMD7    | 0.346041 | 0.123933 | 0.966205 | 0.042807 |
| SETD6    | 0.265375 | 0.099752 | 0.705992 | 0.007876 |
| SLC38A7  | 1.493468 | 0.345317 | 6.459115 | 0.591379 |
| VAC14    | 1.776648 | 0.388181 | 8.131449 | 0.458942 |
| HAS3     | 1.057818 | 0.032131 | 34.82535 | 0.974848 |
| COG4     | 1.658124 | 0.654174 | 4.202821 | 0.286582 |
| SMPD3    | 3.166805 | 0.821014 | 12.21496 | 0.094204 |
| SLC7A6OS | 1.189377 | 0.360162 | 3.927723 | 0.776    |
| SLC7A6   | 1.144028 | 0.478347 | 2.736088 | 0.762313 |
| PLA2G15  | 1.697197 | 0.859558 | 3.351113 | 0.127517 |
| ESRP2    | 0.111916 | 0.014278 | 0.877214 | 0.0371   |
| WDR59    | 0.64683  | 0.327037 | 1.279334 | 0.210558 |
| MON1B    | 0.965809 | 0.383775 | 2.43056  | 0.941105 |
| AXIN1    | 0.952698 | 0.319862 | 2.837578 | 0.930655 |
| HCFC1R1  | 1.135933 | 0.428373 | 3.012198 | 0.797832 |
| MLYCD    | 0.727507 | 0.315112 | 1.679616 | 0.456136 |
| MPG      | 1.724005 | 0.328708 | 9.042061 | 0.519484 |

|          |          |          |          |          |
|----------|----------|----------|----------|----------|
| HSDL1    | 0.326029 | 0.123576 | 0.860161 | 0.023556 |
| TAF1C    | 0.557926 | 0.174854 | 1.780237 | 0.324276 |
| NAGPA    | 1.136619 | 0.593661 | 2.176163 | 0.699176 |
| WFDC1    | 0.950639 | 0.436933 | 2.068316 | 0.898442 |
| COTL1    | 1.371683 | 0.990729 | 1.899122 | 0.05693  |
| USP10    | 1.015393 | 0.430465 | 2.395135 | 0.972169 |
| CRISPLD2 | 1.178269 | 0.905819 | 1.532667 | 0.221441 |
| TSC2     | 1.890102 | 0.583735 | 6.12005  | 0.288241 |
| ZNF500   | 2.504469 | 1.096199 | 5.721925 | 0.029418 |
| NME4     | 0.694911 | 0.427436 | 1.129763 | 0.14213  |
| ABCC1    | 1.829817 | 0.715899 | 4.676958 | 0.206972 |
| NOMO3    | 0.573828 | 0.276961 | 1.188899 | 0.135066 |
| LMF1     | 0.34069  | 0.100614 | 1.153608 | 0.08357  |
| FOXF1    | 0.157354 | 0.014459 | 1.712511 | 0.128943 |
| MTHFSD   | 0.627428 | 0.234885 | 1.675989 | 0.352456 |
| CLCN7    | 1.225838 | 0.688376 | 2.182934 | 0.489175 |
| HAGHL    | 0.529397 | 0.221399 | 1.265863 | 0.152738 |
| SLC7A5   | 0.808973 | 0.579293 | 1.12972  | 0.213448 |
| METRNL   | 1.661001 | 0.959394 | 2.875693 | 0.069995 |
| FBXO31   | 1.353415 | 0.724751 | 2.527396 | 0.342263 |
| STUB1    | 1.758888 | 0.7457   | 4.148704 | 0.197136 |
| RHBDL1   | 0.667682 | 0.122761 | 3.631435 | 0.640155 |
| NUBP1    | 2.469812 | 0.795185 | 7.671129 | 0.117907 |
| UBE2I    | 1.32303  | 0.072595 | 24.1121  | 0.850089 |
| MEFV     | 1.460553 | 0.965235 | 2.210048 | 0.073048 |
| CRYM     | 3.961329 | 0.110888 | 141.514  | 0.450534 |
| EEF2K    | 0.725828 | 0.304624 | 1.729433 | 0.469453 |
| GSPT1    | 0.704429 | 0.344562 | 1.440148 | 0.336915 |
| ZNF174   | 0.778407 | 0.138585 | 4.372162 | 0.776027 |
| CLUAP1   | 0.204386 | 0.036782 | 1.13571  | 0.069596 |
| UBFD1    | 0.818822 | 0.36128  | 1.855813 | 0.632067 |
| PRSS33   | 0.349433 | 0.046374 | 2.632999 | 0.307533 |
| EARS2    | 0.596694 | 0.280012 | 1.27153  | 0.18101  |
| GGA2     | 0.818745 | 0.417694 | 1.604864 | 0.560306 |
| AQP8     | 0.160887 | 0.01208  | 2.142734 | 0.166643 |
| CPPED1   | 1.162786 | 0.605819 | 2.23181  | 0.650276 |
| USP31    | 0.36943  | 0.023265 | 5.866139 | 0.48027  |
| HMOX2    | 1.947343 | 0.444132 | 8.538322 | 0.376839 |
| DNAJA3   | 0.648997 | 0.216925 | 1.941669 | 0.439396 |
| BFAR     | 0.663449 | 0.343938 | 1.27978  | 0.22094  |
| RRN3P2   | 0.62974  | 0.3451   | 1.149151 | 0.131826 |
| RBL2     | 0.700891 | 0.430035 | 1.142344 | 0.15387  |
| QPRT     | 1.248479 | 0.960409 | 1.622955 | 0.097289 |
| XYLT1    | 0.872107 | 0.455704 | 1.668999 | 0.679444 |
| PYCARD   | 2.04328  | 1.159073 | 3.602012 | 0.0135   |
| RPGRIP1L | 1.10018  | 0.075247 | 16.08569 | 0.944385 |
| MAZ      | 4.107769 | 1.076274 | 15.67795 | 0.038685 |
| STX4     | 0.397324 | 0.145207 | 1.087183 | 0.072303 |
| CDIPT    | 5.4938   | 1.392313 | 21.67748 | 0.014993 |
| BCKDK    | 0.979682 | 0.438804 | 2.187254 | 0.960048 |
| NOMO1    | 0.608057 | 0.215203 | 1.718066 | 0.347864 |
| IL21R    | 0.856433 | 0.143843 | 5.099148 | 0.864805 |
| SYT17    | 1.240729 | 0.453415 | 3.395144 | 0.674506 |
| TMC5     | 0.069797 | 0.005674 | 0.858509 | 0.037607 |
| RNF40    | 3.011453 | 0.905109 | 10.01962 | 0.07227  |
| AQP9     | 1.110908 | 0.921477 | 1.339282 | 0.270183 |
| AAGAB    | 0.458397 | 0.182353 | 1.152311 | 0.097211 |
| IQCH     | 0.177354 | 0.003433 | 9.162995 | 0.390145 |

|          |          |          |          |          |
|----------|----------|----------|----------|----------|
| LACTB    | 1.331538 | 0.615157 | 2.88218  | 0.467379 |
| CORO2B   | 9.288012 | 0.814848 | 105.869  | 0.072645 |
| CSK      | 2.169446 | 1.24493  | 3.780531 | 0.006274 |
| HERC1    | 0.634124 | 0.306759 | 1.31084  | 0.218911 |
| TRIP4    | 1.113471 | 0.43415  | 2.855739 | 0.823015 |
| MTFMT    | 0.07737  | 0.009469 | 0.632171 | 0.016947 |
| ACSBG1   | 0.759529 | 0.401707 | 1.436081 | 0.397359 |
| IGDCC4   | 0.082703 | 0.003137 | 2.180273 | 0.135422 |
| RAB11A   | 0.733071 | 0.355347 | 1.512305 | 0.400669 |
| CTSH     | 1.28721  | 1.020992 | 1.622844 | 0.032704 |
| TTC23    | 0.989591 | 0.30519  | 3.208787 | 0.986091 |
| CD276    | 4.406902 | 0.767196 | 25.31399 | 0.096343 |
| FAH      | 1.234936 | 0.745371 | 2.046051 | 0.412693 |
| RPAP1    | 1.141564 | 0.465191 | 2.80136  | 0.77253  |
| HOMER2   | 1.061461 | 0.637212 | 1.768171 | 0.8188   |
| EHD4     | 1.616969 | 1.075509 | 2.431024 | 0.020896 |
| TMEM87A  | 0.662907 | 0.302204 | 1.454138 | 0.304998 |
| CEP152   | 0.256585 | 0.089932 | 0.732067 | 0.01099  |
| ATP8B4   | 0.844442 | 0.626188 | 1.138768 | 0.267764 |
| DTWD1    | 0.529258 | 0.178299 | 1.571036 | 0.251712 |
| TGM5     | 0.814737 | 0.244214 | 2.718087 | 0.738901 |
| FAM189A1 | 0.093462 | 0.009026 | 0.967789 | 0.046876 |
| GABPB1   | 0.667623 | 0.203595 | 2.189252 | 0.5049   |
| BMF      | 12.11868 | 4.321185 | 33.9866  | 2.12E-06 |
| DMXL2    | 1.282578 | 0.862432 | 1.907404 | 0.219048 |
| SCG3     | 2.578197 | 0.121113 | 54.88359 | 0.543855 |
| DNAJC17  | 0.45668  | 0.152163 | 1.370609 | 0.162188 |
| EIF3J    | 0.501327 | 0.253178 | 0.992698 | 0.047593 |
| SPG11    | 0.673665 | 0.313354 | 1.448281 | 0.31176  |
| RHOV     | 0.429914 | 0.04974  | 3.71582  | 0.442999 |
| VPS18    | 1.650054 | 0.962984 | 2.827335 | 0.068351 |
| OIP5     | 0.60066  | 0.341981 | 1.055007 | 0.076123 |
| SLC30A4  | 0.430273 | 0.027265 | 6.790306 | 0.549084 |
| MYEF2    | 1.057294 | 0.07993  | 13.98564 | 0.966271 |
| SGK3     | 0.437752 | 0.147127 | 1.302461 | 0.137556 |
| CSPP1    | 0.497497 | 0.189135 | 1.308605 | 0.157101 |
| ZDHHC2   | 0.394333 | 0.182102 | 0.853912 | 0.018246 |
| BRF2     | 1.352524 | 0.627187 | 2.916708 | 0.441205 |
| TRIM35   | 0.392466 | 0.041294 | 3.730084 | 0.415581 |
| ZFAND1   | 0.577182 | 0.295732 | 1.126491 | 0.10721  |
| CA2      | 0.891625 | 0.729124 | 1.090343 | 0.263815 |
| FZD3     | 0.687483 | 0.240127 | 1.968264 | 0.485041 |
| INTS9    | 0.724514 | 0.317527 | 1.653149 | 0.443889 |
| RIPK2    | 0.935082 | 0.591911 | 1.477214 | 0.773584 |
| NBN      | 1.036957 | 0.297755 | 3.611295 | 0.954542 |
| DECR1    | 0.72896  | 0.351769 | 1.510602 | 0.395121 |
| SFRP1    | 2.470905 | 0.605429 | 10.08436 | 0.207442 |
| LAPTM4B  | 1.290333 | 1.041047 | 1.599311 | 0.019952 |
| UBE2W    | 1.205923 | 0.367977 | 3.952006 | 0.757183 |
| POP1     | 0.535467 | 0.151968 | 1.886744 | 0.331042 |
| NIPAL2   | 0.146886 | 0.008342 | 2.586513 | 0.189985 |
| IKBKB    | 0.841085 | 0.281067 | 2.516924 | 0.756973 |
| PLAT     | 0.800652 | 0.098887 | 6.48259  | 0.834954 |
| DKK4     | 0.285016 | 0.013758 | 5.904313 | 0.416966 |
| STK3     | 0.737919 | 0.39591  | 1.375373 | 0.338728 |
| GDAP1    | 0.122648 | 0.008769 | 1.71548  | 0.118995 |
| RAB2A    | 0.94108  | 0.48017  | 1.844412 | 0.859599 |
| EIF3E    | 0.799227 | 0.28154  | 2.268823 | 0.673763 |

|          |          |          |          |          |
|----------|----------|----------|----------|----------|
| NDRG1    | 0.747845 | 0.415333 | 1.346566 | 0.332884 |
| IL7      | 1.813991 | 0.194214 | 16.94294 | 0.60139  |
| ARMC1    | 0.891976 | 0.359014 | 2.216125 | 0.805531 |
| TRPS1    | 3.037169 | 0.817095 | 11.28926 | 0.097234 |
| SPAG1    | 0.172554 | 0.028298 | 1.0522   | 0.056806 |
| CHRACT1  | 0.536268 | 0.204471 | 1.406471 | 0.205286 |
| NCALD    | 2.33977  | 1.330401 | 4.114942 | 0.003167 |
| SNX16    | 0.770416 | 0.208334 | 2.848982 | 0.695875 |
| UBR5     | 0.539067 | 0.233839 | 1.242706 | 0.147044 |
| GSDMD    | 1.019747 | 0.487799 | 2.131789 | 0.958549 |
| EEF1D    | 2.180371 | 0.911596 | 5.215045 | 0.079785 |
| SQLE     | 1.950827 | 1.12287  | 3.389283 | 0.017732 |
| SH2D4A   | 2.548601 | 0.81254  | 7.993904 | 0.108705 |
| INTS10   | 0.351957 | 0.181069 | 0.684126 | 0.002074 |
| ERI1     | 0.619131 | 0.364554 | 1.051486 | 0.076033 |
| SLC39A14 | 1.612782 | 0.697881 | 3.727094 | 0.263428 |
| MTMR9    | 0.868272 | 0.423372 | 1.780694 | 0.69991  |
| LEPROTL1 | 1.082643 | 0.615152 | 1.905409 | 0.783076 |
| DCTN6    | 1.146971 | 0.47744  | 2.755413 | 0.759111 |
| R3HCC1   | 0.709504 | 0.296945 | 1.695251 | 0.439971 |
| GSR      | 0.835708 | 0.260665 | 2.679335 | 0.762702 |
| TNFRSF10 | 1.149327 | 0.526535 | 2.508767 | 0.726756 |
| UBXN8    | 0.473644 | 0.132243 | 1.696406 | 0.250953 |
| PPP2CB   | 1.717392 | 0.625525 | 4.715136 | 0.293949 |
| ERICH1   | 1.057447 | 0.472306 | 2.367518 | 0.891954 |
| TUSC3    | 0.380889 | 0.027798 | 5.218962 | 0.469829 |
| KLHDC4   | 0.656905 | 0.293712 | 1.469209 | 0.306217 |
| MCM4     | 0.461868 | 0.271668 | 0.785228 | 0.004332 |
| KCTD9    | 1.189312 | 0.367607 | 3.847763 | 0.772262 |
| ASAH1    | 1.731645 | 0.535777 | 5.596721 | 0.358955 |
| BNIP3L   | 1.080767 | 0.753656 | 1.549853 | 0.672812 |
| MAN2B1   | 1.511945 | 0.918745 | 2.488153 | 0.103838 |
| KCNN4    | 1.998703 | 1.027726 | 3.887041 | 0.041295 |
| TULP2    | 3.370078 | 0.250253 | 45.38369 | 0.359781 |
| NUCB1    | 1.354102 | 0.610242 | 3.004697 | 0.456009 |
| DHDH     | 1.518473 | 0.227724 | 10.12526 | 0.666108 |
| GYS1     | 1.77483  | 0.605674 | 5.200853 | 0.295618 |
| MAP4K1   | 0.896835 | 0.487419 | 1.650148 | 0.726344 |
| ECH1     | 0.682938 | 0.278745 | 1.673227 | 0.404229 |
| HNRNPL   | 0.617472 | 0.389675 | 0.978436 | 0.040094 |
| NFKBIB   | 2.011265 | 0.800604 | 5.052669 | 0.137073 |
| LHB      | 3.030873 | 0.20506  | 44.79754 | 0.419707 |
| SARS2    | 1.086401 | 0.558825 | 2.112053 | 0.806981 |
| SNRNP70  | 1.089892 | 0.566959 | 2.095152 | 0.796293 |
| CLPTM1   | 2.067888 | 1.144607 | 3.735918 | 0.016061 |
| RELB     | 1.915418 | 1.042718 | 3.518519 | 0.03619  |
| LIN7B    | 3.929725 | 1.414195 | 10.91981 | 0.008676 |
| FCGRT    | 1.162538 | 0.894758 | 1.510458 | 0.259541 |
| PIH1D1   | 2.850358 | 1.069669 | 7.595378 | 0.036202 |
| CKM      | 0.918617 | 0.639563 | 1.319426 | 0.645881 |
| ARHGEF1E | 1.116974 | 0.502705 | 2.481835 | 0.78595  |
| PPP1R13L | 2.468129 | 0.944764 | 6.447811 | 0.065184 |
| PEX11G   | 1.633765 | 0.716324 | 3.726231 | 0.24325  |
| ERCC2    | 0.987006 | 0.451925 | 2.155626 | 0.973821 |
| DOT1L    | 0.750012 | 0.238695 | 2.356642 | 0.622397 |
| PLEKHJ1  | 3.100656 | 1.262058 | 7.61777  | 0.013608 |
| KLC3     | 0.911122 | 0.086256 | 9.62421  | 0.938315 |
| CD37     | 1.759954 | 1.184657 | 2.614631 | 0.005126 |



|         |          |          |          |          |
|---------|----------|----------|----------|----------|
| SF3A2   | 1.331004 | 0.698906 | 2.534776 | 0.384309 |
| AMH     | 0.565803 | 0.111175 | 2.879533 | 0.492712 |
| LYL1    | 0.995713 | 0.528009 | 1.877702 | 0.989408 |
| OAZ1    | 2.979359 | 0.493772 | 17.97709 | 0.233868 |
| TRMT1   | 0.949867 | 0.475461 | 1.897629 | 0.884185 |
| STX10   | 2.263693 | 1.080627 | 4.741974 | 0.03035  |
| RETN    | 0.929895 | 0.744021 | 1.162205 | 0.522944 |
| FCER2   | 0.836829 | 0.531839 | 1.316718 | 0.441148 |
| DMPK    | 0.320537 | 0.020991 | 4.894623 | 0.413319 |
| TBC1D17 | 3.323829 | 1.328649 | 8.31509  | 0.010248 |
| IL4I1   | 1.580066 | 0.60354  | 4.136612 | 0.351523 |
| CCDC130 | 1.058298 | 0.454819 | 2.462508 | 0.895378 |
| PTOV1   | 0.968281 | 0.504634 | 1.857917 | 0.922774 |
| SGTA    | 1.829737 | 0.904844 | 3.700015 | 0.092637 |
| KIR3DX1 | 0.344066 | 0.04483  | 2.640661 | 0.304847 |
| LILRB1  | 1.38646  | 0.589391 | 3.261452 | 0.454057 |
| MED25   | 1.199255 | 0.699803 | 2.055169 | 0.508524 |
| LILRA1  | 1.504159 | 0.74272  | 3.046226 | 0.256857 |
| SNAPC2  | 1.831107 | 0.946845 | 3.541186 | 0.072233 |
| TIMM44  | 0.969397 | 0.375259 | 2.504216 | 0.94882  |
| CCDC61  | 2.057379 | 0.440235 | 9.614883 | 0.359116 |
| IL27RA  | 2.356361 | 1.508035 | 3.681904 | 0.000167 |
| ASF1B   | 0.927816 | 0.599291 | 1.436436 | 0.736901 |
| TNNT1   | 1.213011 | 0.697992 | 2.10804  | 0.493443 |
| VRK3    | 1.111704 | 0.454263 | 2.720641 | 0.816612 |
| FAM32A  | 0.532763 | 0.267246 | 1.062081 | 0.073638 |
| MED26   | 1.491841 | 0.654142 | 3.402304 | 0.341627 |
| OLFM2   | 0.09273  | 0.006794 | 1.265723 | 0.074544 |
| RASAL3  | 0.659579 | 0.339985 | 1.279601 | 0.218402 |
| AKAP8   | 0.43293  | 0.16511  | 1.135171 | 0.088721 |
| ILVBL   | 0.853299 | 0.469668 | 1.550284 | 0.602532 |
| ZNF419  | 0.964138 | 0.333053 | 2.791036 | 0.94631  |
| SYDE1   | 0.836365 | 0.268068 | 2.609442 | 0.758233 |
| AURKC   | 0.022559 | 0.00016  | 3.171298 | 0.132946 |
| POP4    | 1.412098 | 0.398405 | 5.005006 | 0.592994 |
| CCNE1   | 0.945683 | 0.433834 | 2.061426 | 0.88829  |
| PDCD5   | 0.415651 | 0.157776 | 1.095006 | 0.075679 |
| ANKRD27 | 0.595128 | 0.339727 | 1.042533 | 0.069624 |
| RPS16   | 0.742872 | 0.045048 | 12.25044 | 0.835346 |
| TIMM50  | 0.094343 | 0.004049 | 2.198351 | 0.141666 |
| FBL     | 0.694868 | 0.384097 | 1.257081 | 0.228765 |
| DYRK1B  | 3.234214 | 1.497094 | 6.986964 | 0.00282  |
| CLC     | 1.061986 | 0.918772 | 1.227523 | 0.415806 |
| GPI     | 0.726487 | 0.4153   | 1.27085  | 0.262753 |
| AKT2    | 0.648673 | 0.159225 | 2.642647 | 0.545871 |
| PLD3    | 1.224781 | 0.605551 | 2.477232 | 0.572622 |
| PRX     | 0.319727 | 0.010583 | 9.659777 | 0.511993 |
| PIAS4   | 1.237179 | 0.521488 | 2.935083 | 0.629193 |
| NUMBL   | 0.989448 | 0.293325 | 3.337624 | 0.986357 |
| EBI3    | 1.007232 | 0.469645 | 2.160178 | 0.985232 |
| SHD     | 0.72558  | 0.550334 | 0.956632 | 0.022948 |
| TBCB    | 2.729121 | 1.137284 | 6.549023 | 0.024576 |
| FSD1    | 2.2691   | 0.130182 | 39.55099 | 0.5742   |
| POLR2I  | 1.272269 | 0.66433  | 2.436546 | 0.467627 |
| CLIP3   | 1.289076 | 0.905859 | 1.834409 | 0.158338 |
| SLC1A5  | 1.311669 | 0.79621  | 2.160832 | 0.286786 |
| PRKD2   | 2.582038 | 1.252964 | 5.320922 | 0.010133 |
| TJP3    | 2.028859 | 0.476186 | 8.644235 | 0.338732 |

|         |          |          |          |          |
|---------|----------|----------|----------|----------|
| APLP1   | 0.921329 | 0.015224 | 55.7581  | 0.968778 |
| CCDC9   | 1.911291 | 0.772763 | 4.727235 | 0.160907 |
| HNRNPUL | 0.57933  | 0.108502 | 3.093251 | 0.52301  |
| FZR1    | 5.616595 | 0.754592 | 41.80556 | 0.091983 |
| BBC3    | 3.6789   | 1.209726 | 11.18791 | 0.021706 |
| TGFB1   | 1.033882 | 0.131563 | 8.124745 | 0.974729 |
| DENND3  | 0.631152 | 0.354111 | 1.124935 | 0.11859  |
| CEACAM4 | 1.439515 | 0.702761 | 2.94866  | 0.319351 |
| MRPL4   | 1.107637 | 0.381282 | 3.217726 | 0.850969 |
| SIGLEC8 | 0.105337 | 0.008578 | 1.293523 | 0.078606 |
| CD79A   | 1.545954 | 0.690935 | 3.459047 | 0.289049 |
| RPS19   | 2.155408 | 0.151463 | 30.67275 | 0.570815 |
| NKG7    | 0.951818 | 0.653039 | 1.387293 | 0.797249 |
| ICAM5   | 1.342493 | 0.508153 | 3.546743 | 0.552379 |
| ETFB    | 0.754154 | 0.226926 | 2.506314 | 0.645173 |
| CD33    | 0.825854 | 0.605448 | 1.126495 | 0.227057 |
| TYK2    | 1.003491 | 0.513613 | 1.96061  | 0.991863 |
| CDC37   | 0.453954 | 0.16522  | 1.247271 | 0.125649 |
| NAPA    | 2.222971 | 0.922126 | 5.358921 | 0.075178 |
| RABAC1  | 1.620734 | 0.974925 | 2.694339 | 0.062597 |
| PTPRS   | 1.877257 | 0.093849 | 37.55064 | 0.680313 |
| CNFN    | 1.670446 | 0.83743  | 3.33209  | 0.145289 |
| MEGF8   | 0.760916 | 0.183751 | 3.150961 | 0.706262 |
| KDELR1  | 1.971619 | 0.90448  | 4.297811 | 0.087738 |
| CYTH2   | 0.911731 | 0.537679 | 1.546004 | 0.731616 |
| GRWD1   | 1.291973 | 0.802248 | 2.080646 | 0.292032 |
| GRIN2D  | 0.24009  | 0.020453 | 2.818326 | 0.256207 |
| CLEC11A | 0.955118 | 0.790668 | 1.153771 | 0.633852 |
| CCDC114 | 2.330556 | 0.265178 | 20.4824  | 0.445466 |
| CARD8   | 0.682945 | 0.341444 | 1.366004 | 0.280962 |
| LIG1    | 0.511542 | 0.267494 | 0.978248 | 0.042719 |
| SIGLEC6 | 2.722682 | 0.645319 | 11.48734 | 0.172681 |
| ZNF175  | 1.206982 | 0.535175 | 2.72211  | 0.650287 |
| PLA2G4C | 1.338806 | 0.809229 | 2.21495  | 0.255994 |
| SIGLEC5 | 1.440904 | 0.623374 | 3.330592 | 0.392861 |
| HAS1    | 0.41578  | 0.050696 | 3.410002 | 0.413701 |
| RAB3D   | 1.44016  | 0.449421 | 4.614957 | 0.539288 |
| DBP     | 1.937582 | 0.952206 | 3.94266  | 0.068024 |
| TMEM205 | 1.14204  | 0.593135 | 2.19892  | 0.69112  |
| CAPS    | 1.21742  | 0.412123 | 3.596288 | 0.721852 |
| FAM83E  | 0.07882  | 0.004557 | 1.363278 | 0.080657 |
| RASIP1  | 3.307918 | 0.970358 | 11.27659 | 0.055892 |
| BCAT2   | 1.049995 | 0.510173 | 2.161009 | 0.894611 |
| MIER2   | 2.706203 | 1.228797 | 5.959924 | 0.013457 |
| PLEKHA4 | 3.143256 | 1.457328 | 6.779572 | 0.003497 |
| PPP2R1A | 2.178546 | 0.985486 | 4.815966 | 0.054375 |
| TNPO2   | 0.605288 | 0.280893 | 1.304321 | 0.199949 |
| GCDH    | 0.986184 | 0.407975 | 2.38387  | 0.975355 |
| LILRB5  | 2.14145  | 0.664817 | 6.897858 | 0.201983 |
| KLF1    | 0.864326 | 0.605746 | 1.233286 | 0.42146  |
| DNASE2  | 1.315129 | 0.821314 | 2.105851 | 0.254102 |
| MAST1   | 1.725718 | 0.62847  | 4.738656 | 0.289719 |
| LENG1   | 3.398754 | 0.978124 | 11.80988 | 0.05421  |
| PRPF31  | 0.703739 | 0.278728 | 1.776814 | 0.457165 |
| TFPT    | 2.771924 | 1.273993 | 6.031087 | 0.010155 |
| JAK3    | 0.450978 | 0.084943 | 2.39432  | 0.349829 |
| RPL18A  | 0.38327  | 0.025156 | 5.839444 | 0.490121 |
| SLC5A5  | 6.483831 | 0.167375 | 251.1732 | 0.316391 |

|         |          |          |          |          |
|---------|----------|----------|----------|----------|
| KCNN1   | 0.137564 | 0.008276 | 2.286545 | 0.166588 |
| ARRDC2  | 7.048297 | 2.177852 | 22.81078 | 0.001119 |
| RAB3A   | 1.530565 | 0.218852 | 10.70417 | 0.667987 |
| ISYNA1  | 1.130073 | 0.720224 | 1.773151 | 0.594701 |
| ELL     | 3.444098 | 1.588428 | 7.467639 | 0.001737 |
| CRTC1   | 2.785067 | 1.321546 | 5.869337 | 0.007082 |
| COPE    | 2.586965 | 1.290486 | 5.185942 | 0.007392 |
| DDX49   | 1.018116 | 0.46245  | 2.241453 | 0.964434 |
| ETV2    | 0.802036 | 0.298311 | 2.156347 | 0.661986 |
| ARMC6   | 1.447929 | 0.693183 | 3.02445  | 0.324689 |
| TMEM147 | 1.60848  | 0.789495 | 3.277043 | 0.190535 |
| HAMP    | 1.899097 | 0.595014 | 6.061312 | 0.27873  |
| USF2    | 1.983442 | 0.935252 | 4.206395 | 0.074189 |
| LSR     | 15.75287 | 0.984618 | 252.0296 | 0.051295 |
| FKBP8   | 1.911899 | 1.072424 | 3.408502 | 0.028021 |
| ZNF14   | 1.10705  | 0.444962 | 2.754305 | 0.826893 |
| SCN1B   | 3.681255 | 0.443976 | 30.52335 | 0.227207 |
| PBX4    | 1.412683 | 0.504318 | 3.957175 | 0.510923 |
| ERF     | 2.683316 | 1.55737  | 4.623298 | 0.000377 |
| GSK3A   | 8.939338 | 1.491607 | 53.57426 | 0.016501 |
| ATP13A1 | 1.099116 | 0.563045 | 2.145573 | 0.781846 |
| ZNF574  | 1.232037 | 0.531178 | 2.857639 | 0.626885 |
| GRIK5   | 1.684647 | 0.900638 | 3.151139 | 0.102592 |
| SIPA1L3 | 2.336516 | 1.018729 | 5.358942 | 0.045094 |
| ZNF85   | 0.621992 | 0.271417 | 1.425387 | 0.261758 |
| ETHE1   | 0.674979 | 0.26228  | 1.737064 | 0.415063 |
| CADM4   | 1.982612 | 0.38879  | 10.11022 | 0.41028  |
| AVL9    | 0.314298 | 0.089799 | 1.100051 | 0.070175 |
| RUNDC3B | 0.804241 | 0.158166 | 4.089407 | 0.79289  |
| GTPBP10 | 2.390369 | 0.176188 | 32.43044 | 0.512469 |
| RASA4   | 1.151689 | 0.362289 | 3.661127 | 0.810843 |
| CDK6    | 0.704544 | 0.525068 | 0.945368 | 0.019571 |
| PMPCB   | 0.461495 | 0.235032 | 0.906166 | 0.024693 |
| DNAJC2  | 1.198431 | 0.507183 | 2.83179  | 0.679911 |
| TFPI2   | 6.686703 | 0.363209 | 123.1028 | 0.20107  |
| BET1    | 0.846712 | 0.393726 | 1.820861 | 0.670167 |
| NAMPT   | 1.000044 | 0.75389  | 1.326571 | 0.999757 |
| PIK3CG  | 0.835747 | 0.439376 | 1.589692 | 0.584409 |
| PON2    | 0.747083 | 0.547505 | 1.019413 | 0.065957 |
| ITGB8   | 0.023652 | 0.001527 | 0.366234 | 0.007395 |
| HBP1    | 1.720686 | 0.837364 | 3.535811 | 0.139693 |
| DUS4L   | 0.20331  | 0.068464 | 0.60375  | 0.004123 |
| SP4     | 1.01434  | 0.510274 | 2.01634  | 0.967601 |
| WDR91   | 1.712574 | 0.677401 | 4.329651 | 0.255583 |
| DNAH11  | 2.773059 | 0.215506 | 35.68286 | 0.433921 |
| CBLL1   | 0.484702 | 0.235051 | 0.99951  | 0.049845 |
| MTPN    | 0.93251  | 0.480605 | 1.809334 | 0.836308 |
| MPP6    | 1.65954  | 1.010781 | 2.724699 | 0.045247 |
| ZC3HAV1 | 0.900036 | 0.395198 | 2.049769 | 0.801965 |
| TTC26   | 0.368949 | 0.102338 | 1.330141 | 0.127524 |
| OGDH    | 8.078271 | 2.016303 | 32.3654  | 0.003175 |
| ADAP1   | 1.735413 | 1.195938 | 2.51824  | 0.003709 |
| TFEC    | 0.293127 | 0.015064 | 5.703786 | 0.417773 |
| CAV2    | 1.082184 | 0.698524 | 1.676566 | 0.723629 |
| CAV1    | 1.297069 | 0.787439 | 2.136531 | 0.307023 |
| MET     | 1.365013 | 0.367382 | 5.071729 | 0.642178 |
| RNF32   | 1.102036 | 0.179184 | 6.777865 | 0.916509 |
| LMBR1   | 0.384237 | 0.152266 | 0.969608 | 0.042835 |

|          |          |          |          |          |
|----------|----------|----------|----------|----------|
| HOXA1    | 1.123674 | 0.04695  | 26.89312 | 0.942622 |
| DNAJB6   | 0.487852 | 0.247982 | 0.959746 | 0.03762  |
| HOXA2    | 0.811159 | 0.423212 | 1.554724 | 0.52836  |
| HOXA3    | 1.308837 | 0.469546 | 3.648318 | 0.606852 |
| LFNG     | 2.898801 | 1.63256  | 5.147163 | 0.00028  |
| HOXA5    | 1.121712 | 0.974302 | 1.291425 | 0.110089 |
| HOXA6    | 1.18564  | 0.952868 | 1.475275 | 0.126756 |
| IQCE     | 0.400025 | 0.040112 | 3.98935  | 0.434908 |
| TSPAN12  | 0.365946 | 0.046672 | 2.869326 | 0.33869  |
| SSBP1    | 0.36854  | 0.194698 | 0.697603 | 0.002169 |
| HOXA13   | 2.562833 | 1.11719  | 5.879135 | 0.026313 |
| HIBADH   | 0.445593 | 0.202663 | 0.979722 | 0.044333 |
| TAX1BP1  | 0.913075 | 0.410513 | 2.030887 | 0.823569 |
| CPVL     | 1.318436 | 1.045774 | 1.662189 | 0.019357 |
| CHN2     | 0.821567 | 0.390263 | 1.729532 | 0.604815 |
| GRB10    | 3.126449 | 1.309557 | 7.464114 | 0.010247 |
| ABHD11   | 2.238043 | 0.610576 | 8.203465 | 0.224155 |
| FKBP14   | 1.000848 | 0.464067 | 2.158519 | 0.998276 |
| PLEKHA8  | 0.355625 | 0.037019 | 3.416326 | 0.370438 |
| STX1A    | 1.340522 | 0.509281 | 3.528502 | 0.552856 |
| NOD1     | 0.617401 | 0.270965 | 1.406764 | 0.251091 |
| CRHR2    | 0.292904 | 0.009292 | 9.233139 | 0.485528 |
| EPHB6    | 1.716556 | 0.916094 | 3.216447 | 0.091712 |
| CASP2    | 0.393918 | 0.189386 | 0.81934  | 0.012659 |
| CHCHD2   | 1.306972 | 0.431427 | 3.959359 | 0.635924 |
| CCL24    | 1.679429 | 0.127169 | 22.17899 | 0.693765 |
| HSPB1    | 1.930507 | 1.314714 | 2.83473  | 0.000791 |
| NPTX2    | 1.198562 | 1.010677 | 1.421375 | 0.037338 |
| PDAP1    | 0.179709 | 0.03113  | 1.03743  | 0.054999 |
| BUD31    | 0.637948 | 0.282759 | 1.439313 | 0.278916 |
| PTCD1    | 0.837017 | 0.39289  | 1.78319  | 0.644763 |
| CYP3A5   | 10.4254  | 1.246225 | 87.21463 | 0.030536 |
| ZKSCAN1  | 1.495064 | 0.658914 | 3.392274 | 0.336025 |
| EIF3B    | 0.741229 | 0.312157 | 1.760073 | 0.497355 |
| SNX8     | 2.235755 | 1.318822 | 3.7902   | 0.002812 |
| NUDT1    | 0.899021 | 0.405283 | 1.99426  | 0.793423 |
| TAF6     | 3.11759  | 1.363474 | 7.128384 | 0.007045 |
| WASL     | 1.058129 | 0.412721 | 2.712815 | 0.906365 |
| AIMP2    | 0.339599 | 0.137469 | 0.838934 | 0.019254 |
| TFR2     | 0.682754 | 0.389075 | 1.198104 | 0.183505 |
| FSCN3    | 2.902073 | 0.424913 | 19.82059 | 0.277095 |
| MOSPD3   | 1.508162 | 0.811514 | 2.802851 | 0.193787 |
| PCOLCE   | 0.698017 | 0.176053 | 2.767503 | 0.60897  |
| FBXO24   | 0.390465 | 0.008115 | 18.78689 | 0.634192 |
| RBM28    | 0.296041 | 0.097944 | 0.894799 | 0.031011 |
| USP42    | 0.58149  | 0.170658 | 1.981339 | 0.386062 |
| IMPDH1   | 2.359041 | 0.770576 | 7.221963 | 0.132727 |
| AGFG2    | 2.157147 | 0.308795 | 15.06919 | 0.438249 |
| LSM5     | 0.855429 | 0.483193 | 1.514422 | 0.592083 |
| SERPINE1 | 0.923318 | 0.549526 | 1.551364 | 0.763156 |
| AP1S1    | 2.332141 | 1.151792 | 4.722105 | 0.018644 |
| C1GALT1  | 2.033719 | 0.842249 | 4.910678 | 0.114505 |
| PLOD3    | 1.324112 | 0.68571  | 2.556873 | 0.403052 |
| RPA3     | 0.530148 | 0.277939 | 1.011218 | 0.054091 |
| ZNHIT1   | 1.912839 | 0.724324 | 5.051543 | 0.190523 |
| CLDN15   | 1.110701 | 0.550813 | 2.239703 | 0.769214 |
| GLCCI1   | 0.793954 | 0.389042 | 1.620293 | 0.526111 |
| PHF14    | 0.384855 | 0.152431 | 0.971673 | 0.043303 |

|          |          |          |          |          |
|----------|----------|----------|----------|----------|
| NRF1     | 0.544812 | 0.02844  | 10.43658 | 0.686848 |
| TMEM106I | 0.574651 | 0.322429 | 1.024175 | 0.060252 |
| EZH2     | 0.325204 | 0.140985 | 0.750135 | 0.008435 |
| ZNF862   | 3.135476 | 0.439658 | 22.36106 | 0.254237 |
| SFRP4    | 1.573149 | 0.086439 | 28.63062 | 0.759554 |
| MEST     | 0.614423 | 0.275633 | 1.369631 | 0.233692 |
| ANKMY2   | 0.363873 | 0.194348 | 0.681268 | 0.001581 |
| TSPAN13  | 0.96394  | 0.718409 | 1.293386 | 0.806575 |
| RARRES2  | 1.394307 | 0.160278 | 12.12949 | 0.76329  |
| AGR2     | 0.569293 | 0.198845 | 1.629888 | 0.293849 |
| AHR      | 1.472648 | 0.714522 | 3.035163 | 0.294186 |
| CHCHD3   | 0.217532 | 0.081378 | 0.581487 | 0.00236  |
| GIMAP2   | 1.823669 | 1.176967 | 2.825713 | 0.007161 |
| TMEM176I | 1.351357 | 1.030531 | 1.772064 | 0.029448 |
| PSMA2    | 0.451962 | 0.186816 | 1.09343  | 0.078101 |
| MRPL32   | 0.609088 | 0.286461 | 1.295074 | 0.197691 |
| BLVRA    | 1.236055 | 0.915404 | 1.669025 | 0.166634 |
| STAG3L4  | 0.291802 | 0.10091  | 0.843811 | 0.023    |
| RHEB     | 0.851511 | 0.294779 | 2.459707 | 0.766468 |
| PRKAG2   | 2.297088 | 0.942139 | 5.600675 | 0.067416 |
| AEBP1    | 1.163169 | 0.889744 | 1.52062  | 0.268937 |
| POLD2    | 0.917196 | 0.484319 | 1.736971 | 0.790787 |
| BCL7B    | 1.173159 | 0.477455 | 2.882578 | 0.727707 |
| YKT6     | 0.471641 | 0.089367 | 2.489111 | 0.375891 |
| TBL2     | 1.022737 | 0.490158 | 2.133986 | 0.952227 |
| CLIP2    | 1.062705 | 0.50361  | 2.242493 | 0.87318  |
| EIF4H    | 0.853366 | 0.312098 | 2.333351 | 0.757344 |
| LIMK1    | 1.366502 | 0.253256 | 7.373284 | 0.716547 |
| FKTN     | 0.633125 | 0.088009 | 4.554621 | 0.649818 |
| FSD1L    | 0.234435 | 0.054784 | 1.003214 | 0.050508 |
| CNTNAP3  | 0.614819 | 0.106219 | 3.558714 | 0.587143 |
| SPIN1    | 0.797454 | 0.403665 | 1.575397 | 0.514691 |
| PRUNE2   | 2.747046 | 0.067024 | 112.5897 | 0.593764 |
| MEGF9    | 1.048011 | 0.645544 | 1.701397 | 0.84956  |
| TRIM14   | 0.289943 | 0.034867 | 2.411102 | 0.251958 |
| CORO2A   | 1.033818 | 0.399787 | 2.673374 | 0.945299 |
| TGFBR1   | 0.871992 | 0.129203 | 5.885087 | 0.888184 |
| SEC61B   | 1.620696 | 0.506178 | 5.189188 | 0.416083 |
| C5       | 0.655626 | 0.362751 | 1.184958 | 0.162118 |
| OGN      | 0.053777 | 0.001808 | 1.599376 | 0.091286 |
| ASPN     | 0.141641 | 0.005795 | 3.461761 | 0.230725 |
| ECM2     | 1.024979 | 0.032448 | 32.37731 | 0.988826 |
| TLE4     | 1.172561 | 0.626629 | 2.194117 | 0.618524 |
| LHX6     | 1.390425 | 0.461629 | 4.187957 | 0.557938 |
| PTGR1    | 1.164936 | 0.750375 | 1.808531 | 0.496327 |
| SUSD1    | 0.845344 | 0.432275 | 1.653131 | 0.623435 |
| AKNA     | 1.773817 | 1.082525 | 2.906563 | 0.022925 |
| TNFSF8   | 2.708664 | 1.156136 | 6.346018 | 0.021793 |
| DNM1     | 1.047588 | 0.528966 | 2.074688 | 0.893919 |
| ENG      | 1.441439 | 0.922946 | 2.25121  | 0.107955 |
| AK1      | 1.166021 | 0.583191 | 2.331324 | 0.663918 |
| CDC37L1  | 1.045219 | 0.138442 | 7.891255 | 0.965798 |
| TBC1D13  | 0.622313 | 0.284785 | 1.359879 | 0.234347 |
| DOCK8    | 1.552396 | 0.855537 | 2.816865 | 0.147976 |
| KANK1    | 0.284137 | 0.07326  | 1.102012 | 0.068835 |
| TESK1    | 2.588668 | 1.293086 | 5.182333 | 0.007237 |
| FUBP3    | 0.429455 | 0.095142 | 1.93848  | 0.271685 |
| CREB3    | 1.201265 | 0.365561 | 3.947457 | 0.762575 |

|           |          |          |          |          |
|-----------|----------|----------|----------|----------|
| RGP1      | 1.31868  | 0.150715 | 11.53777 | 0.802609 |
| DDX58     | 2.186121 | 0.897703 | 5.32373  | 0.085011 |
| EDF1      | 1.48953  | 0.443239 | 5.005643 | 0.519377 |
| PIP5K1B   | 0.718816 | 0.259779 | 1.988985 | 0.524919 |
| GLIS3     | 0.07572  | 0.000735 | 7.803581 | 0.275179 |
| BAG1      | 0.194776 | 0.047531 | 0.79817  | 0.023013 |
| RAPGEF1   | 0.630288 | 0.148161 | 2.681285 | 0.532082 |
| NPDC1     | 1.49624  | 1.128209 | 1.984327 | 0.005151 |
| APBA1     | 0.585118 | 0.013202 | 25.93216 | 0.781739 |
| SETX      | 0.679236 | 0.308682 | 1.494615 | 0.336431 |
| PTGDS     | 1.186979 | 0.955738 | 1.47417  | 0.121028 |
| ABCA2     | 1.167946 | 0.478569 | 2.850371 | 0.733072 |
| SHB       | 3.350839 | 0.716772 | 15.66485 | 0.124351 |
| UBE2R2    | 1.112899 | 0.359863 | 3.44171  | 0.852681 |
| EXOSC3    | 1.561203 | 0.716597 | 3.401292 | 0.262201 |
| ZFAND5    | 0.680175 | 0.416504 | 1.110765 | 0.12352  |
| DVL1      | 4.269768 | 0.389809 | 46.7688  | 0.234613 |
| PDLIM1    | 1.027686 | 0.79554  | 1.327575 | 0.834407 |
| CCNJ      | 0.984463 | 0.324811 | 2.983786 | 0.977918 |
| DNTT      | 1.205692 | 1.043084 | 1.39365  | 0.011386 |
| GATA3     | 2.763218 | 0.753421 | 10.13427 | 0.12529  |
| HPS1      | 1.230674 | 0.57706  | 2.624611 | 0.591171 |
| PHYH      | 1.184445 | 0.529559 | 2.649203 | 0.680232 |
| RASSF4    | 1.368447 | 0.866794 | 2.160428 | 0.178182 |
| DNMBP     | 0.671109 | 0.110223 | 4.086157 | 0.665218 |
| RAB11FIP2 | 0.536173 | 0.299985 | 0.958319 | 0.035409 |
| CXCL12    | 1.026577 | 0.603966 | 1.744899 | 0.922795 |
| ERLIN1    | 0.506806 | 0.270669 | 0.948954 | 0.033696 |
| EIF3A     | 0.635999 | 0.346413 | 1.167668 | 0.144313 |
| CUBN      | 2.608133 | 0.209346 | 32.49341 | 0.456344 |
| TRDMT1    | 0.760026 | 0.201829 | 2.862028 | 0.685025 |
| DDX50     | 0.54965  | 0.264423 | 1.142543 | 0.108928 |
| MAPK8     | 1.678216 | 0.129982 | 21.66762 | 0.691605 |
| SEC23IP   | 0.661789 | 0.303506 | 1.443021 | 0.299318 |
| ATE1      | 0.097221 | 0.011773 | 0.802857 | 0.030479 |
| NSMCE4A   | 0.25434  | 0.083534 | 0.7744   | 0.015952 |
| PLEKHA1   | 0.811089 | 0.423846 | 1.552133 | 0.527186 |
| UNC5B     | 23.69281 | 3.903524 | 143.8057 | 0.000581 |
| CDH23     | 1.775132 | 0.726229 | 4.338983 | 0.208223 |
| SPOCK2    | 1.157189 | 0.894825 | 1.496477 | 0.265763 |
| PPP3CB    | 0.361808 | 0.14436  | 0.906796 | 0.030108 |
| BMPR1A    | 0.822763 | 0.180706 | 3.746077 | 0.800845 |
| MINPP1    | 0.853091 | 0.564926 | 1.288249 | 0.449921 |
| ACTA2     | 0.779456 | 0.506313 | 1.199952 | 0.257681 |
| LIPA      | 1.119834 | 0.653664 | 1.918461 | 0.680296 |
| LZTS2     | 2.842456 | 1.42807  | 5.657675 | 0.002934 |
| SFXN3     | 3.918378 | 1.746378 | 8.791733 | 0.000926 |
| KAZALD1   | 7.890215 | 1.324812 | 46.99195 | 0.023273 |
| FBXW4     | 0.697984 | 0.308145 | 1.581011 | 0.388734 |
| NPM3      | 0.85938  | 0.486987 | 1.516536 | 0.601009 |
| TNKS2     | 1.538489 | 0.208835 | 11.33408 | 0.672435 |
| GBF1      | 3.240712 | 1.085012 | 9.679352 | 0.035195 |
| ARHGAP2   | 1.315637 | 0.987853 | 1.752184 | 0.060605 |
| CPEB3     | 1.924962 | 0.612961 | 6.045211 | 0.262003 |
| FBXL15    | 1.998875 | 1.056073 | 3.783355 | 0.033374 |
| CUEDC2    | 0.970088 | 0.394771 | 2.383835 | 0.947216 |
| SUFU      | 1.27848  | 0.284102 | 5.753253 | 0.748869 |
| ANKRD26   | 0.240024 | 0.054678 | 1.053645 | 0.058661 |

|          |          |          |          |          |
|----------|----------|----------|----------|----------|
| ACBD5    | 0.110621 | 0.007789 | 1.570987 | 0.103885 |
| LHPP     | 1.100568 | 0.624176 | 1.940559 | 0.740525 |
| LARP4B   | 0.954494 | 0.454628 | 2.003966 | 0.90205  |
| GTPBP4   | 0.398117 | 0.19155  | 0.827447 | 0.01361  |
| BCCIP    | 0.110964 | 0.029843 | 0.412597 | 0.001034 |
| MTPAP    | 1.221659 | 0.124547 | 11.98302 | 0.863548 |
| SH3PXD2A | 1.136256 | 0.835577 | 1.545133 | 0.41534  |
| PITRM1   | 1.427062 | 0.498596 | 4.084476 | 0.507451 |
| MAP3K8   | 0.590559 | 0.389802 | 0.894712 | 0.012961 |
| EBF3     | 0.719318 | 0.328124 | 1.576901 | 0.410704 |
| GLRX3    | 1.207175 | 0.519467 | 2.805318 | 0.661652 |
| SORCS1   | 0.190993 | 0.041633 | 0.876195 | 0.033171 |
| XPNPEP1  | 0.265177 | 0.105279 | 0.667926 | 0.004859 |
| SMC3     | 0.608759 | 0.283497 | 1.307205 | 0.203047 |
| SHOC2    | 1.203817 | 0.708147 | 2.046433 | 0.493218 |
| TFAM     | 0.414087 | 0.23629  | 0.72567  | 0.002068 |
| CCDC6    | 1.506118 | 0.86551  | 2.620874 | 0.147353 |
| CUL2     | 1.070191 | 0.451818 | 2.534891 | 0.877462 |
| CCNY     | 0.942835 | 0.207369 | 4.286748 | 0.939273 |
| UBE2S    | 5.546058 | 0.76264  | 40.33196 | 0.090592 |
| RPL28    | 1.462355 | 0.683805 | 3.127328 | 0.327116 |
| ZMIZ1    | 1.298412 | 0.75827  | 2.223316 | 0.341297 |
| DNAJC12  | 0.793521 | 0.55555  | 1.133426 | 0.203574 |
| PPIF     | 1.675702 | 0.65354  | 4.296566 | 0.282568 |
| PBLD     | 0.346927 | 0.004615 | 26.07932 | 0.630996 |
| TSPAN14  | 1.489448 | 0.95597  | 2.320634 | 0.078249 |
| TBC1D12  | 3.182038 | 0.52028  | 19.46138 | 0.21028  |
| KRT23    | 0.694542 | 0.196573 | 2.453995 | 0.571397 |
| CRYBA1   | 0.904327 | 0.061606 | 13.27478 | 0.941512 |
| NUFIP2   | 0.578365 | 0.337622 | 0.990772 | 0.046183 |
| GIT1     | 2.501971 | 1.220669 | 5.12822  | 0.012262 |
| RPL19    | 4.308875 | 0.524832 | 35.37588 | 0.173891 |
| FBXL20   | 0.351683 | 0.143124 | 0.86415  | 0.02271  |
| RUNDC3A  | 1.374359 | 0.956387 | 1.974998 | 0.08563  |
| UBTF     | 2.250914 | 0.34292  | 14.77493 | 0.398039 |
| CSF3     | 0.064584 | 0.0003   | 13.88114 | 0.31735  |
| PSMD3    | 1.703384 | 0.689166 | 4.210185 | 0.248651 |
| CASC3    | 1.109492 | 0.556052 | 2.213773 | 0.768148 |
| RAPGEFL1 | 1.029988 | 0.602002 | 1.762246 | 0.914127 |
| RGS9     | 0.119482 | 0.003448 | 4.140038 | 0.240175 |
| RNF43    | 0.123417 | 0.007312 | 2.083045 | 0.146774 |
| RAD51C   | 0.09618  | 0.026496 | 0.34913  | 0.000371 |
| MTMR4    | 0.194616 | 0.077792 | 0.486879 | 0.000468 |
| TRIM37   | 0.513826 | 0.060472 | 4.365909 | 0.541903 |
| P2RX1    | 0.798291 | 0.49306  | 1.292476 | 0.359473 |
| DHX40    | 0.075086 | 0.014292 | 0.394484 | 0.002221 |
| TUBD1    | 0.622476 | 0.250932 | 1.544153 | 0.306465 |
| KPNB1    | 0.476567 | 0.23359  | 0.972285 | 0.041628 |
| GOSR2    | 1.288426 | 0.186181 | 8.916271 | 0.797362 |
| PNPO     | 0.642194 | 0.322655 | 1.278188 | 0.207287 |
| RPS6KB1  | 0.59373  | 0.296311 | 1.189678 | 0.141515 |
| TRIM16L  | 1.308832 | 0.748991 | 2.287134 | 0.344631 |
| CDK5RAP3 | 0.294492 | 0.156301 | 0.55486  | 0.000155 |
| CBX1     | 1.283123 | 0.752467 | 2.188007 | 0.359914 |
| RECQL5   | 0.190624 | 0.02064  | 1.760545 | 0.143937 |
| PIGL     | 0.193773 | 0.028039 | 1.339139 | 0.096137 |
| GALK1    | 1.506654 | 0.869431 | 2.61091  | 0.143964 |
| INTS2    | 0.431225 | 0.196967 | 0.944096 | 0.035391 |

|          |          |          |          |          |
|----------|----------|----------|----------|----------|
| CAMTA2   | 1.83427  | 0.72593  | 4.634808 | 0.199594 |
| MED13    | 0.797871 | 0.162095 | 3.927299 | 0.781248 |
| HOXB6    | 1.493455 | 0.744076 | 2.997555 | 0.259172 |
| ENO3     | 0.329493 | 0.099168 | 1.094765 | 0.069959 |
| PFN1     | 2.531767 | 0.8296   | 7.726433 | 0.102722 |
| RNF167   | 1.706888 | 0.74531  | 3.909063 | 0.20599  |
| SLC25A11 | 1.614346 | 0.694061 | 3.754877 | 0.266129 |
| RASD1    | 1.347508 | 1.0474   | 1.733606 | 0.020328 |
| CHRNE    | 1.207111 | 0.149732 | 9.731527 | 0.859697 |
| RAI1     | 1.168394 | 0.625642 | 2.18199  | 0.625299 |
| NUP88    | 0.399742 | 0.192825 | 0.828699 | 0.013697 |
| C1QBP    | 0.711599 | 0.363772 | 1.392009 | 0.320298 |
| SLC6A4   | 0.34009  | 0.031031 | 3.727294 | 0.37728  |
| BLMH     | 0.553478 | 0.265842 | 1.152332 | 0.113877 |
| CPD      | 0.986688 | 0.715024 | 1.361565 | 0.934993 |
| GOSR1    | 0.442086 | 0.073898 | 2.644747 | 0.371139 |
| CCDC47   | 0.550252 | 0.228863 | 1.322963 | 0.181985 |
| MED31    | 0.897523 | 0.197105 | 4.086893 | 0.888828 |
| DRG2     | 1.387288 | 0.51218  | 3.757601 | 0.519644 |
| FTSJ3    | 0.669866 | 0.21766  | 2.061566 | 0.484809 |
| AKAP10   | 0.528857 | 0.182908 | 1.529123 | 0.239605 |
| SMARCD2  | 1.874805 | 0.971317 | 3.61869  | 0.061037 |
| ICAM2    | 2.026845 | 1.150585 | 3.570447 | 0.014464 |
| SYNGR2   | 2.385614 | 0.490278 | 11.60802 | 0.281471 |
| B9D1     | 1.622212 | 0.713184 | 3.689891 | 0.248576 |
| UTP6     | 0.594316 | 0.306119 | 1.153835 | 0.124236 |
| DDX5     | 0.602994 | 0.34591  | 1.051143 | 0.074415 |
| CYTH1    | 1.687293 | 1.009341 | 2.820611 | 0.045996 |
| PSMD11   | 1.499217 | 0.40235  | 5.586317 | 0.546255 |
| LGALS3BP | 1.064644 | 0.867766 | 1.306189 | 0.548218 |
| CCL7     | 1.447961 | 0.220807 | 9.495146 | 0.699665 |
| CCL2     | 1.963981 | 1.177074 | 3.276957 | 0.009763 |
| CCL1     | 1.300528 | 1.04347  | 1.620911 | 0.019352 |
| PEX12    | 0.588559 | 0.013466 | 25.72339 | 0.78329  |
| DHX58    | 1.302891 | 0.620637 | 2.735133 | 0.48438  |
| KAT2A    | 0.592267 | 0.344569 | 1.018026 | 0.05805  |
| RAB5C    | 3.17036  | 1.396842 | 7.195646 | 0.005795 |
| NAGLU    | 1.232207 | 0.5549   | 2.736229 | 0.607954 |
| HSD17B1  | 0.284913 | 0.054091 | 1.500727 | 0.138581 |
| MLX      | 3.030649 | 0.82196  | 11.17431 | 0.095821 |
| CNTNAP1  | 1.004093 | 0.326288 | 3.089915 | 0.994317 |
| ABI3     | 1.472173 | 1.06629  | 2.032555 | 0.018774 |
| EZH1     | 4.415584 | 0.643088 | 30.31836 | 0.130827 |
| DLX4     | 7.941981 | 0.084241 | 748.749  | 0.371672 |
| PPP1R9B  | 1.7059   | 0.749498 | 3.882724 | 0.203091 |
| COL1A1   | 1.324734 | 0.45435  | 3.862491 | 0.606511 |
| MRPL27   | 0.858622 | 0.148468 | 4.965587 | 0.864828 |
| VAT1     | 0.981131 | 0.64644  | 1.489106 | 0.928695 |
| LRRC59   | 1.189103 | 0.365823 | 3.865163 | 0.773367 |
| RND2     | 1.14026  | 0.228581 | 5.688099 | 0.872823 |
| ALOX12   | 1.200867 | 0.73579  | 1.959909 | 0.463936 |
| HDAC5    | 1.642622 | 0.124851 | 21.61144 | 0.705823 |
| ABCC3    | 1.589711 | 0.822471 | 3.072668 | 0.167992 |
| MPP2     | 3.508067 | 0.39661  | 31.02929 | 0.259128 |
| SMURF2   | 0.554252 | 0.05268  | 5.831323 | 0.623085 |
| DUSP3    | 1.487913 | 0.836561 | 2.646414 | 0.1762   |
| EFTUD2   | 1.027871 | 0.373872 | 2.825885 | 0.957513 |
| HLF      | 1.736079 | 0.599274 | 5.029365 | 0.30941  |



|          |          |          |          |          |
|----------|----------|----------|----------|----------|
| SLC16A6  | 2.27407  | 1.2374   | 4.179241 | 0.008145 |
| PRKAR1A  | 0.890034 | 0.558512 | 1.418339 | 0.624139 |
| FAM20A   | 1.997495 | 0.984843 | 4.051394 | 0.055157 |
| YWHAE    | 0.769479 | 0.207    | 2.860376 | 0.695679 |
| MMD      | 1.101302 | 0.78651  | 1.542084 | 0.574259 |
| RANGRF   | 1.162857 | 0.723234 | 1.869709 | 0.533485 |
| DPH1     | 0.937253 | 0.260358 | 3.373986 | 0.921014 |
| MAP2K6   | 0.021992 | 0.0009   | 0.537252 | 0.019232 |
| DHRS7B   | 1.801724 | 0.818521 | 3.965946 | 0.143603 |
| WSB1     | 0.618522 | 0.31107  | 1.229849 | 0.170691 |
| RCVRN    | 1.477867 | 0.320744 | 6.80944  | 0.616289 |
| SLC9A3R1 | 1.928941 | 1.012509 | 3.674842 | 0.045742 |
| MYH3     | 0.343653 | 0.15794  | 0.747737 | 0.007084 |
| NAT9     | 0.464307 | 0.205779 | 1.047634 | 0.064619 |
| TMEM104  | 1.689493 | 0.81782  | 3.490238 | 0.156576 |
| VTN      | 0.717948 | 0.041227 | 12.50263 | 0.820194 |
| TNFAIP1  | 2.316334 | 0.974747 | 5.504408 | 0.057165 |
| IFT20    | 1.203364 | 0.607819 | 2.382428 | 0.595258 |
| TMEM97   | 0.444181 | 0.170876 | 1.154617 | 0.095914 |
| CDR2L    | 1.149365 | 0.716374 | 1.844065 | 0.563852 |
| PMP22    | 0.530345 | 0.130542 | 2.154597 | 0.375218 |
| UNC119   | 1.84513  | 0.903829 | 3.766761 | 0.092517 |
| ALDOC    | 1.72746  | 1.014315 | 2.942003 | 0.04419  |
| SUPT6H   | 4.91814  | 1.285855 | 18.81091 | 0.019949 |
| RAB34    | 1.543467 | 1.139024 | 2.09152  | 0.005117 |
| PHF12    | 4.757491 | 0.567064 | 39.91388 | 0.150652 |
| TMEM33   | 0.621245 | 0.19691  | 1.960008 | 0.416776 |
| GNRHR    | 2.334083 | 0.297641 | 18.30371 | 0.419863 |
| SLAIN2   | 0.941733 | 0.230455 | 3.848301 | 0.933385 |
| OCIAD1   | 0.402819 | 0.151363 | 1.072011 | 0.068649 |
| DCUN1D4  | 0.294366 | 0.113999 | 0.760109 | 0.011515 |
| USP46    | 0.271415 | 0.069048 | 1.06688  | 0.061864 |
| CHIC2    | 1.24034  | 0.431742 | 3.563337 | 0.68914  |
| NMU      | 0.553794 | 0.239501 | 1.280528 | 0.167036 |
| PF4V1    | 1.02917  | 0.732191 | 1.446604 | 0.868536 |
| NFKB1    | 0.812491 | 0.415259 | 1.589711 | 0.544279 |
| AREG     | 0.638201 | 0.039978 | 10.18823 | 0.750688 |
| MANBA    | 0.585354 | 0.309718 | 1.106298 | 0.099163 |
| UBE2D3   | 0.207276 | 0.031138 | 1.379794 | 0.103715 |
| ELF2     | 0.346796 | 0.130581 | 0.921019 | 0.033582 |
| NDUFC1   | 1.935266 | 0.991837 | 3.776076 | 0.052876 |
| TBC1D9   | 1.472468 | 0.970919 | 2.233102 | 0.068596 |
| ZNF330   | 0.728347 | 0.237989 | 2.229055 | 0.57861  |
| INPP4B   | 1.269731 | 0.743464 | 2.168519 | 0.381865 |
| GAB1     | 1.125548 | 0.078282 | 16.1833  | 0.930705 |
| KLHL2    | 1.23168  | 0.713131 | 2.127289 | 0.45484  |
| RPL34    | 0.947611 | 0.63061  | 1.423965 | 0.795656 |
| WFS1     | 1.456875 | 0.860247 | 2.467296 | 0.161535 |
| GRPEL1   | 0.773634 | 0.310078 | 1.930187 | 0.582179 |
| GAR1     | 0.286445 | 0.130602 | 0.628249 | 0.001809 |
| FRG1     | 0.638303 | 0.234623 | 1.736535 | 0.379305 |
| CLCN3    | 1.428968 | 0.516382 | 3.954342 | 0.49187  |
| AADAT    | 0.782905 | 0.028443 | 21.54982 | 0.884949 |
| GALNT7   | 0.921651 | 0.307863 | 2.759153 | 0.884051 |
| DHX15    | 0.489559 | 0.25225  | 0.950123 | 0.034756 |
| SEPSECS  | 0.17064  | 0.018782 | 1.550273 | 0.116289 |
| SLC2A9   | 2.238876 | 0.753258 | 6.65452  | 0.147017 |
| FBXW7    | 0.969484 | 0.182166 | 5.159582 | 0.971018 |

|          |          |          |          |          |
|----------|----------|----------|----------|----------|
| NEIL3    | 0.210311 | 0.049337 | 0.896499 | 0.035061 |
| TBC1D19  | 0.364546 | 0.126497 | 1.050563 | 0.061675 |
| CLNK     | 0.577792 | 0.059833 | 5.579554 | 0.63542  |
| SH3D19   | 1.450627 | 0.278262 | 7.562376 | 0.658808 |
| STIM2    | 1.063419 | 0.302555 | 3.737702 | 0.923618 |
| MFSD10   | 0.334776 | 0.168388 | 0.665574 | 0.001802 |
| GLRB     | 0.135899 | 0.014218 | 1.298954 | 0.083119 |
| BST1     | 1.055396 | 0.744356 | 1.496409 | 0.762151 |
| RAPGEF2  | 1.245008 | 0.774446 | 2.001488 | 0.365619 |
| HGFAC    | 0.283226 | 0.028104 | 2.854308 | 0.284531 |
| SNX25    | 1.746531 | 0.504931 | 6.04117  | 0.378472 |
| LRP2BP   | 4.130848 | 0.562502 | 30.3357  | 0.163203 |
| UFSP2    | 0.931318 | 0.393801 | 2.202518 | 0.871289 |
| KLF3     | 1.364155 | 0.318225 | 5.847814 | 0.675834 |
| KLHL5    | 0.517008 | 0.130618 | 2.046407 | 0.347312 |
| NCAPG    | 0.785463 | 0.52773  | 1.169068 | 0.234    |
| UGDH     | 0.715421 | 0.350078 | 1.462037 | 0.358433 |
| HTATIP2  | 1.197387 | 0.818451 | 1.751767 | 0.353431 |
| CTSC     | 1.674699 | 0.699891 | 4.007219 | 0.246719 |
| CCDC34   | 0.546318 | 0.256454 | 1.163804 | 0.117157 |
| ZBTB16   | 0.758556 | 0.481611 | 1.194754 | 0.233164 |
| ELP4     | 1.329355 | 0.452518 | 3.905227 | 0.604599 |
| MTCH2    | 0.397938 | 0.082996 | 1.907984 | 0.249253 |
| FNBP4    | 0.563537 | 0.323809 | 0.980743 | 0.042484 |
| TECTA    | 0.292467 | 0.039978 | 2.139585 | 0.225957 |
| CRTAM    | 0.63076  | 0.061774 | 6.440587 | 0.697471 |
| HSPA8    | 0.938092 | 0.501824 | 1.753637 | 0.841311 |
| VWA5A    | 1.176416 | 0.613608 | 2.25544  | 0.624663 |
| DNAJC4   | 2.223123 | 0.839484 | 5.887278 | 0.107871 |
| SIAE     | 2.331755 | 0.419089 | 12.97358 | 0.333634 |
| LPXN     | 0.953999 | 0.594116 | 1.53188  | 0.845477 |
| DTX4     | 1.568482 | 0.18486  | 13.30808 | 0.679917 |
| ATG2A    | 1.216522 | 0.638392 | 2.318209 | 0.551336 |
| EHD1     | 0.783063 | 0.408504 | 1.501058 | 0.461386 |
| OSBP     | 1.565601 | 0.658309 | 3.723336 | 0.31052  |
| UNC93B1  | 1.728872 | 1.174453 | 2.545015 | 0.005519 |
| PUS3     | 1.213896 | 0.440575 | 3.344588 | 0.707775 |
| DCPS     | 0.832498 | 0.344776 | 2.010154 | 0.683571 |
| FOXRED1  | 0.32887  | 0.135475 | 0.798344 | 0.013984 |
| NRXN2    | 1.160041 | 0.698008 | 1.927907 | 0.566786 |
| MS4A6A   | 1.18941  | 0.966462 | 1.463789 | 0.101452 |
| MS4A4A   | 2.341923 | 1.237713 | 4.431238 | 0.008912 |
| ST3GAL4  | 1.111094 | 0.706392 | 1.747656 | 0.648491 |
| CPT1A    | 0.759341 | 0.188894 | 3.052494 | 0.698135 |
| CCND1    | 1.209937 | 0.834341 | 1.754617 | 0.314939 |
| CCDC86   | 0.888586 | 0.490586 | 1.609471 | 0.696726 |
| PRPF19   | 0.864678 | 0.390028 | 1.916962 | 0.720384 |
| TMEM109  | 1.427497 | 0.756712 | 2.692899 | 0.271723 |
| HPX      | 0.051497 | 0.003387 | 0.782984 | 0.032668 |
| TRIM3    | 49.02973 | 5.167675 | 465.183  | 0.000697 |
| CHORDC1  | 0.937733 | 0.284378 | 3.092168 | 0.915894 |
| FOLR1    | 0.672403 | 0.003253 | 138.9758 | 0.883988 |
| FOLR3    | 1.033059 | 0.873679 | 1.221513 | 0.703631 |
| PANX1    | 2.095964 | 0.66352  | 6.620853 | 0.207314 |
| ARHGEF17 | 1.427254 | 0.755794 | 2.695251 | 0.27274  |
| CEP164   | 7.281762 | 2.683639 | 19.75827 | 9.69E-05 |
| RNF141   | 1.61226  | 0.508133 | 5.115553 | 0.417499 |
| EIF4G2   | 0.577254 | 0.319064 | 1.044372 | 0.069303 |

|          |          |          |          |          |
|----------|----------|----------|----------|----------|
| IL10RA   | 1.351608 | 1.022895 | 1.785953 | 0.034075 |
| BIRC2    | 0.692623 | 0.26365  | 1.819555 | 0.456104 |
| UBE4A    | 0.528156 | 0.224401 | 1.243086 | 0.14382  |
| DDX6     | 0.855008 | 0.232012 | 3.150868 | 0.81391  |
| UPK2     | 0.053259 | 0.003187 | 0.890055 | 0.041248 |
| CBL      | 1.509597 | 0.774717 | 2.941567 | 0.226275 |
| HIPK3    | 1.044157 | 0.356627 | 3.057153 | 0.937164 |
| FBXO3    | 0.583995 | 0.119197 | 2.861226 | 0.507085 |
| PDHX     | 0.323707 | 0.119594 | 0.876183 | 0.026409 |
| SLC1A2   | 0.067723 | 0.005438 | 0.84345  | 0.036414 |
| COMMD9   | 1.159749 | 0.508055 | 2.64739  | 0.724889 |
| SLC15A3  | 1.181149 | 0.963026 | 1.448677 | 0.109979 |
| CD5      | 1.159233 | 0.75838  | 1.771962 | 0.494927 |
| ACCS     | 0.726383 | 0.549563 | 0.960093 | 0.024697 |
| MDK      | 2.071447 | 1.197529 | 3.583121 | 0.009196 |
| AMBRA1   | 4.23897  | 1.075081 | 16.71397 | 0.039076 |
| MADD     | 1.417483 | 0.315635 | 6.365763 | 0.648935 |
| PTPMT1   | 0.476217 | 0.202686 | 1.118888 | 0.088715 |
| SLC22A18 | 2.45242  | 1.164143 | 5.166345 | 0.018287 |
| CD81     | 1.131258 | 0.569764 | 2.246095 | 0.724512 |
| SLC35F2  | 0.84255  | 0.544111 | 1.304681 | 0.44255  |
| SOX6     | 1.58032  | 0.308246 | 8.102012 | 0.583173 |
| PITPNM1  | 1.425689 | 0.905775 | 2.244032 | 0.125432 |
| RPS13    | 1.53357  | 0.52514  | 4.478496 | 0.434206 |
| AIP      | 2.084039 | 1.066227 | 4.073448 | 0.031753 |
| NUP98    | 0.334664 | 0.06348  | 1.764345 | 0.196857 |
| NDUFS8   | 0.793516 | 0.35333  | 1.782095 | 0.575291 |
| TCIRG1   | 1.501544 | 0.80795  | 2.790564 | 0.198603 |
| CHKA     | 0.339309 | 0.088383 | 1.302631 | 0.115312 |
| EXPH5    | 0.032777 | 0.002786 | 0.385573 | 0.006573 |
| HPS5     | 0.673673 | 0.191575 | 2.368973 | 0.538101 |
| GTF2H1   | 0.641636 | 0.298367 | 1.379832 | 0.256026 |
| POU2AF1  | 1.48723  | 0.892854 | 2.477284 | 0.127351 |
| VWF      | 1.289458 | 1.037604 | 1.602443 | 0.021853 |
| PSMD9    | 0.862813 | 0.302867 | 2.457997 | 0.782356 |
| PPFIBP1  | 1.647111 | 0.442211 | 6.135025 | 0.457008 |
| PRPF40B  | 0.039841 | 0.001349 | 1.176758 | 0.062078 |
| CD69     | 0.941915 | 0.718668 | 1.234512 | 0.66461  |
| PRDM4    | 0.438635 | 0.207921 | 0.925356 | 0.030492 |
| CLEC2B   | 0.832238 | 0.529964 | 1.30692  | 0.425158 |
| COQ5     | 0.561766 | 0.265621 | 1.188084 | 0.131301 |
| SELPLG   | 1.509182 | 0.917886 | 2.481386 | 0.104752 |
| CORO1C   | 1.648786 | 0.834249 | 3.258612 | 0.150266 |
| CAPRIN2  | 0.647697 | 0.337965 | 1.241288 | 0.190641 |
| TSPAN11  | 0.233745 | 0.003957 | 13.8072  | 0.484884 |
| KCTD10   | 1.727611 | 0.776822 | 3.842116 | 0.180022 |
| SLC11A2  | 0.557695 | 0.351918 | 0.883796 | 0.012925 |
| MLEC     | 0.711445 | 0.414935 | 1.219839 | 0.215865 |
| MVK      | 2.528744 | 0.934297 | 6.844234 | 0.067822 |
| CSRNP2   | 0.777447 | 0.333533 | 1.812187 | 0.559874 |
| CAMKK2   | 0.657344 | 0.380428 | 1.13583  | 0.132702 |
| BIN2     | 0.91681  | 0.486406 | 1.728066 | 0.788264 |
| IL23A    | 1.867952 | 0.706688 | 4.937464 | 0.207693 |
| PTGES3   | 1.050472 | 0.582337 | 1.894938 | 0.870056 |
| BCL7A    | 1.041817 | 0.272011 | 3.99022  | 0.952321 |
| RSRC2    | 0.720067 | 0.334621 | 1.549503 | 0.400949 |
| CYP27B1  | 0.293953 | 0.058949 | 1.4658   | 0.135308 |
| LIN7A    | 0.85973  | 0.498287 | 1.483354 | 0.58707  |

|          |          |          |          |          |
|----------|----------|----------|----------|----------|
| KRT18    | 2.309456 | 1.16331  | 4.584839 | 0.016742 |
| GLI1     | 0.420809 | 0.036869 | 4.802895 | 0.485945 |
| PPM1H    | 0.536772 | 0.304014 | 0.947732 | 0.031949 |
| METAP2   | 0.465669 | 0.234522 | 0.924637 | 0.028973 |
| LTA4H    | 1.006163 | 0.599155 | 1.689654 | 0.981465 |
| ELK3     | 4.745532 | 1.01483  | 22.19098 | 0.047853 |
| SLC6A12  | 1.183016 | 0.712643 | 1.963853 | 0.515746 |
| WNT5B    | 4.286948 | 0.583283 | 31.50772 | 0.152643 |
| MAGOHB   | 0.556867 | 0.240359 | 1.290156 | 0.172045 |
| TRPV4    | 1.555315 | 0.250052 | 9.673991 | 0.635768 |
| ITFG2    | 0.634677 | 0.314906 | 1.279162 | 0.203575 |
| FOXM1    | 0.946689 | 0.490832 | 1.825917 | 0.87015  |
| PRR4     | 0.68234  | 0.265075 | 1.756439 | 0.428173 |
| PARP11   | 0.752537 | 0.329473 | 1.71884  | 0.4999   |
| ARPC3    | 1.284763 | 0.553531 | 2.981977 | 0.559714 |
| GPN3     | 1.016536 | 0.315125 | 3.279168 | 0.978103 |
| VPS29    | 0.541509 | 0.277441 | 1.056914 | 0.072219 |
| RAD51AP1 | 0.501808 | 0.290617 | 0.866473 | 0.013352 |
| CUX2     | 1.815007 | 0.767535 | 4.291983 | 0.174634 |
| SH2B3    | 1.89245  | 1.237676 | 2.893622 | 0.003238 |
| MANSC1   | 1.171776 | 0.564204 | 2.43362  | 0.670758 |
| DUSP16   | 1.305452 | 0.432131 | 3.943721 | 0.636542 |
| CREBL2   | 1.179708 | 0.381077 | 3.652045 | 0.774382 |
| ACAD10   | 0.718461 | 0.311889 | 1.655028 | 0.43739  |
| ALDH2    | 1.494628 | 1.143483 | 1.953604 | 0.003269 |
| CDKN1B   | 1.473488 | 0.854026 | 2.542272 | 0.163638 |
| GPRC5D   | 2.192594 | 0.390672 | 12.30565 | 0.372373 |
| GSG1     | 0.183418 | 0.002623 | 12.82561 | 0.433857 |
| SCNN1A   | 0.678419 | 0.140366 | 3.278955 | 0.629333 |
| LTBR     | 2.024207 | 1.236173 | 3.314597 | 0.005069 |
| OGFOD2   | 0.102459 | 0.011712 | 0.896313 | 0.039505 |
| CDK2AP1  | 0.483564 | 0.190519 | 1.227352 | 0.126292 |
| OAS3     | 2.74378  | 1.36707  | 5.506907 | 0.004517 |
| OAS2     | 1.584871 | 0.917495 | 2.737689 | 0.098696 |
| ART4     | 1.011453 | 0.402256 | 2.54325  | 0.980688 |
| MGP      | 1.423087 | 0.505763 | 4.0042   | 0.50384  |
| RASAL1   | 0.154084 | 0.016655 | 1.425515 | 0.099428 |
| ARHGDI1  | 0.546302 | 0.238878 | 1.249368 | 0.152012 |
| GTF2H3   | 0.262343 | 0.101101 | 0.680742 | 0.005951 |
| EIF2B1   | 0.243894 | 0.062704 | 0.948648 | 0.041747 |
| DDX55    | 0.287599 | 0.137047 | 0.603542 | 0.000984 |
| SLC38A1  | 1.133297 | 0.716248 | 1.79318  | 0.593008 |
| VDR      | 3.921642 | 1.165362 | 13.197   | 0.027305 |
| RFC5     | 0.095066 | 0.024344 | 0.371238 | 0.00071  |
| STX2     | 1.467056 | 0.842826 | 2.553615 | 0.175326 |
| COPZ1    | 1.862165 | 0.714194 | 4.855341 | 0.203529 |
| CAND1    | 0.747887 | 0.362154 | 1.544467 | 0.432367 |
| IFNG     | 1.009385 | 0.640964 | 1.589571 | 0.967842 |
| RAB5B    | 0.512182 | 0.244986 | 1.070799 | 0.075377 |
| MDM1     | 0.030133 | 0.002999 | 0.302765 | 0.002931 |
| NUP107   | 0.29987  | 0.149606 | 0.601058 | 0.000687 |
| CNOT2    | 0.722825 | 0.459018 | 1.138246 | 0.161201 |
| TIMELESS | 0.497964 | 0.311485 | 0.796085 | 0.003584 |
| CPSF6    | 0.183955 | 0.056587 | 0.59801  | 0.004882 |
| KRR1     | 0.346912 | 0.132382 | 0.909097 | 0.031251 |
| MRPL51   | 0.425443 | 0.212577 | 0.851463 | 0.01577  |
| GAPDH    | 1.385095 | 0.468333 | 4.096419 | 0.555976 |
| NOP2     | 0.363044 | 0.093298 | 1.41269  | 0.143855 |

|          |          |          |          |          |
|----------|----------|----------|----------|----------|
| CHD4     | 1.254389 | 0.598577 | 2.628721 | 0.548224 |
| ACRBP    | 1.134625 | 0.837063 | 1.537965 | 0.415716 |
| UHRF1BP1 | 1.456621 | 0.507281 | 4.182581 | 0.48463  |
| COPS7A   | 1.599256 | 0.669888 | 3.817984 | 0.290252 |
| ING4     | 0.823822 | 0.241532 | 2.809903 | 0.756878 |
| GNB3     | 0.17496  | 0.036626 | 0.835765 | 0.028902 |
| CDC43    | 0.851041 | 0.534167 | 1.355889 | 0.497292 |
| CHPT1    | 1.202557 | 0.617179 | 2.343151 | 0.587843 |
| USP5     | 1.571538 | 0.796411 | 3.101074 | 0.19239  |
| TP1      | 1.40519  | 0.512802 | 3.85053  | 0.50835  |
| GNPTAB   | 0.881306 | 0.300085 | 2.588267 | 0.818197 |
| SPSB2    | 1.21334  | 0.760912 | 1.934777 | 0.416643 |
| ENO2     | 1.389921 | 0.865386 | 2.232391 | 0.173225 |
| ATN1     | 3.930549 | 1.259086 | 12.27018 | 0.018442 |
| PTPN6    | 4.341491 | 1.059868 | 17.78385 | 0.041272 |
| LPCAT3   | 1.553611 | 0.876698 | 2.753182 | 0.131249 |
| NT5DC3   | 0.943032 | 0.432674 | 2.055379 | 0.882695 |
| SUDS3    | 0.62952  | 0.120526 | 3.288046 | 0.583205 |
| GOLT1B   | 1.212584 | 0.602156 | 2.441824 | 0.5894   |
| LDHB     | 0.547148 | 0.322655 | 0.927835 | 0.025226 |
| PRKAB1   | 0.490088 | 0.207908 | 1.155251 | 0.103081 |
| CMAS     | 0.59797  | 0.291382 | 1.227144 | 0.16094  |
| HCFC2    | 0.868591 | 0.276672 | 2.726878 | 0.809276 |
| CLEC4A   | 1.219268 | 0.932917 | 1.593511 | 0.146628 |
| RAB35    | 2.702997 | 0.977613 | 7.473501 | 0.055323 |
| PHC1     | 0.826726 | 0.352268 | 1.940215 | 0.661984 |
| COX6A1   | 2.775376 | 1.051725 | 7.323886 | 0.039224 |
| RIC8B    | 0.41519  | 0.139525 | 1.235501 | 0.114136 |
| FGFR1OP2 | 1.029739 | 0.544565 | 1.947173 | 0.928161 |
| KLRB1    | 0.974426 | 0.747373 | 1.270458 | 0.84821  |
| BTN3A3   | 0.997355 | 0.54905  | 1.811704 | 0.993061 |
| DSE      | 1.857773 | 0.58893  | 5.860327 | 0.290651 |
| RWDD1    | 0.524704 | 0.163618 | 1.682666 | 0.278047 |
| MAK      | 10.97392 | 0.427092 | 281.9698 | 0.148089 |
| TMEM14C  | 0.57909  | 0.266888 | 1.256501 | 0.166897 |
| PAK1IP1  | 0.536984 | 0.170731 | 1.688926 | 0.287541 |
| GCNT2    | 3.458351 | 0.398817 | 29.98919 | 0.260225 |
| NEDD9    | 1.605434 | 0.526429 | 4.896041 | 0.405344 |
| ASF1A    | 1.303066 | 0.688549 | 2.466028 | 0.416004 |
| MCM9     | 0.07584  | 0.004977 | 1.155734 | 0.063479 |
| RNGTT    | 0.884147 | 0.407748 | 1.917158 | 0.755185 |
| MAN1A1   | 0.847415 | 0.525755 | 1.365869 | 0.496639 |
| GABRR2   | 0.989083 | 0.062789 | 15.58062 | 0.993774 |
| SERINC1  | 1.153609 | 0.610245 | 2.180784 | 0.660071 |
| HDDC2    | 0.306573 | 0.183998 | 0.510805 | 5.65E-06 |
| HINT3    | 0.187751 | 0.031516 | 1.118485 | 0.066212 |
| NCOA7    | 0.905444 | 0.64765  | 1.26585  | 0.56123  |
| SASH1    | 4.775694 | 2.616246 | 8.71755  | 3.54E-07 |
| UST      | 1.308427 | 0.803208 | 2.131431 | 0.280248 |
| FBXO5    | 0.859276 | 0.363452 | 2.031507 | 0.729741 |
| MTRF1L   | 0.279552 | 0.07852  | 0.995276 | 0.049152 |
| PPARD    | 3.687819 | 0.202594 | 67.12935 | 0.378033 |
| FANCE    | 0.755912 | 0.403135 | 1.417397 | 0.382972 |
| SLC26A8  | 0.749521 | 0.229188 | 2.451183 | 0.633419 |
| MAPK14   | 0.437624 | 0.102345 | 1.871266 | 0.264969 |
| RHAG     | 1.021671 | 0.836101 | 1.248429 | 0.833949 |
| KCTD20   | 0.946293 | 0.451012 | 1.98547  | 0.88392  |
| STK38    | 0.903865 | 0.569465 | 1.434631 | 0.66806  |

|          |          |          |          |          |
|----------|----------|----------|----------|----------|
| SOD2     | 1.116435 | 0.670249 | 1.859647 | 0.672243 |
| MRPL18   | 0.50914  | 0.243124 | 1.066217 | 0.073462 |
| MCM3     | 0.425535 | 0.228852 | 0.791254 | 0.006938 |
| RNF8     | 1.255172 | 0.185368 | 8.49909  | 0.815847 |
| PHACTR1  | 0.85801  | 0.435564 | 1.69018  | 0.657973 |
| MDGA1    | 2.000423 | 0.673702 | 5.939858 | 0.211787 |
| FBXO9    | 0.03361  | 0.002284 | 0.494665 | 0.013399 |
| CD83     | 1.072427 | 0.835851 | 1.375962 | 0.582395 |
| MDN1     | 0.228966 | 0.06426  | 0.81583  | 0.02297  |
| BACH2    | 2.074099 | 0.549413 | 7.829962 | 0.281774 |
| TREML2   | 1.344073 | 0.591219 | 3.055603 | 0.480376 |
| ZNF451   | 0.412577 | 0.114726 | 1.483706 | 0.175171 |
| BAG2     | 1.956489 | 0.549752 | 6.96287  | 0.300095 |
| RAB23    | 1.063164 | 0.25535  | 4.426533 | 0.932928 |
| KHDRBS2  | 0.331699 | 0.021663 | 5.078926 | 0.427976 |
| FBXL4    | 0.247853 | 0.018679 | 3.288695 | 0.290297 |
| CCNC     | 0.543946 | 0.19772  | 1.496446 | 0.238285 |
| E2F3     | 0.531937 | 0.233966 | 1.209393 | 0.131993 |
| PTP4A1   | 0.518074 | 0.229698 | 1.168492 | 0.113027 |
| ASCC3    | 0.468751 | 0.10119  | 2.17143  | 0.332712 |
| BVES     | 8.574223 | 0.119017 | 617.7057 | 0.324808 |
| MED23    | 0.315422 | 0.096691 | 1.028957 | 0.055793 |
| WASF1    | 0.434991 | 0.159711 | 1.184748 | 0.103453 |
| GPLD1    | 0.269667 | 0.01158  | 6.279935 | 0.414508 |
| ALDH5A1  | 0.830332 | 0.508296 | 1.356395 | 0.457752 |
| VNN1     | 1.391134 | 0.992404 | 1.950068 | 0.055401 |
| VNN2     | 1.100318 | 0.822619 | 1.471761 | 0.51945  |
| SMAP1    | 0.585222 | 0.166518 | 2.056747 | 0.40346  |
| RPS12    | 1.210937 | 0.116259 | 12.61296 | 0.872816 |
| B3GAT2   | 0.085716 | 0.002952 | 2.488992 | 0.152889 |
| GMNN     | 0.674757 | 0.390937 | 1.164628 | 0.157746 |
| SOBP     | 0.887378 | 0.08849  | 8.898575 | 0.919088 |
| SNX3     | 1.062395 | 0.237131 | 4.75974  | 0.93695  |
| HBS1L    | 1.008399 | 0.044572 | 22.81422 | 0.995807 |
| TRIM38   | 1.337957 | 0.698719 | 2.562014 | 0.379744 |
| PEX7     | 0.299468 | 0.068823 | 1.303066 | 0.108027 |
| ZBTB24   | 0.933531 | 0.245938 | 3.543495 | 0.9195   |
| FIG4     | 0.283243 | 0.11715  | 0.684819 | 0.005103 |
| PERP     | 1.330079 | 0.191694 | 9.228834 | 0.772883 |
| SLC16A10 | 0.403041 | 0.109003 | 1.490253 | 0.173194 |
| HECA     | 0.984033 | 0.619653 | 1.562682 | 0.945618 |
| PHACTR2  | 1.155477 | 0.65819  | 2.028484 | 0.614757 |
| EPM2A    | 0.189886 | 0.014434 | 2.498063 | 0.206367 |
| SLC39A7  | 0.545034 | 0.058122 | 5.110984 | 0.595116 |
| PHF1     | 1.348539 | 0.549167 | 3.311485 | 0.514163 |
| CUTA     | 0.740525 | 0.338663 | 1.619242 | 0.451717 |
| QKI      | 1.529622 | 0.305169 | 7.667043 | 0.6053   |
| MDFI     | 0.412816 | 0.070302 | 2.424075 | 0.327285 |
| TFEB     | 3.965534 | 1.746996 | 9.001428 | 0.000988 |
| CCND3    | 1.345934 | 0.79616  | 2.275344 | 0.267423 |
| BYSL     | 1.169108 | 0.620371 | 2.203218 | 0.628916 |
| FAM120B  | 0.985153 | 0.416721 | 2.328961 | 0.972818 |
| TBP      | 0.388734 | 0.100608 | 1.50201  | 0.170661 |
| GUCA1B   | 1.024213 | 0.185677 | 5.649668 | 0.978093 |
| PRPH2    | 3.447767 | 0.444219 | 26.75952 | 0.236473 |
| PPP2R5D  | 1.622466 | 0.470938 | 5.589687 | 0.443198 |
| MRPL2    | 1.099006 | 0.553597 | 2.181759 | 0.787287 |
| PTK7     | 1.326749 | 0.838706 | 2.098784 | 0.226944 |

|         |          |          |          |          |
|---------|----------|----------|----------|----------|
| SRF     | 0.537343 | 0.297721 | 0.969826 | 0.03924  |
| CUL9    | 0.830777 | 0.369094 | 1.869959 | 0.654244 |
| DUSP22  | 2.769802 | 1.022678 | 7.501677 | 0.045062 |
| EXOC2   | 1.305757 | 0.322844 | 5.281204 | 0.708261 |
| COX7A2  | 1.033515 | 0.616356 | 1.733012 | 0.900524 |
| TMEM30A | 0.554331 | 0.294958 | 1.041784 | 0.066832 |
| GMDS    | 0.734489 | 0.500857 | 1.077101 | 0.114167 |
| SENP6   | 0.611078 | 0.223902 | 1.667764 | 0.336309 |
| VEGFA   | 0.624066 | 0.163608 | 2.380435 | 0.490025 |
| PRPF4B  | 0.366273 | 0.123452 | 1.086707 | 0.070279 |
| TTK     | 0.776352 | 0.419217 | 1.437734 | 0.420719 |
| SLC29A1 | 0.746658 | 0.31162  | 1.78903  | 0.512286 |
| BTN2A1  | 0.545668 | 0.158429 | 1.879419 | 0.337056 |
| LAMA4   | 0.116663 | 0.002975 | 4.574213 | 0.251079 |
| CLIC5   | 0.073363 | 0.0039   | 1.380207 | 0.081029 |
| LY86    | 1.148216 | 0.935984 | 1.408572 | 0.18501  |
| HARS2   | 0.614845 | 0.256588 | 1.473314 | 0.275337 |
| NUDT12  | 4.8974   | 0.595844 | 40.25306 | 0.139354 |
| CEP72   | 2.153058 | 0.503019 | 9.215677 | 0.301258 |
| MAN2A1  | 0.799879 | 0.229856 | 2.78351  | 0.725618 |
| HMGCS1  | 0.937119 | 0.528887 | 1.660451 | 0.823907 |
| DAP     | 1.121692 | 0.505902 | 2.48703  | 0.777427 |
| BRD8    | 1.052146 | 0.389821 | 2.839793 | 0.920074 |
| KIF20A  | 0.586273 | 0.342692 | 1.002987 | 0.051286 |
| NNT     | 0.651957 | 0.242035 | 1.756143 | 0.39748  |
| MRPS30  | 0.58529  | 0.263901 | 1.298079 | 0.187495 |
| HSPA9   | 0.486865 | 0.256667 | 0.923523 | 0.027557 |
| MRPS27  | 0.945341 | 0.509442 | 1.754212 | 0.858566 |
| PFDN1   | 1.016007 | 0.366583 | 2.815925 | 0.975643 |
| HBEGF   | 1.272054 | 1.00963  | 1.602687 | 0.041224 |
| LOX     | 1.085115 | 0.301236 | 3.908816 | 0.90058  |
| GZMK    | 1.033493 | 0.781072 | 1.36749  | 0.81764  |
| CDH9    | 0.36806  | 0.079124 | 1.712107 | 0.202533 |
| APBB3   | 0.65019  | 0.376739 | 1.122123 | 0.122072 |
| TMCO6   | 1.156454 | 0.423136 | 3.16065  | 0.7769   |
| SPARC   | 1.347157 | 0.826416 | 2.196027 | 0.231989 |
| IK      | 0.693183 | 0.349789 | 1.373693 | 0.293659 |
| HMGCR   | 0.960298 | 0.499046 | 1.84787  | 0.903447 |
| FAF2    | 0.842929 | 0.373194 | 1.903914 | 0.681047 |
| PDE8B   | 1.223672 | 0.303721 | 4.930096 | 0.776478 |
| CLK4    | 1.181496 | 0.554997 | 2.515209 | 0.665283 |
| HAVCR1  | 0.244863 | 0.016298 | 3.678773 | 0.308789 |
| ITK     | 0.94564  | 0.653038 | 1.369345 | 0.767308 |
| RNF130  | 0.649002 | 0.288401 | 1.460478 | 0.296166 |
| THG1L   | 0.634521 | 0.265846 | 1.514472 | 0.30544  |
| ARSB    | 0.671339 | 0.163526 | 2.75612  | 0.580262 |
| CLINT1  | 0.574178 | 0.30122  | 1.094481 | 0.09186  |
| THBS4   | 0.666652 | 0.332805 | 1.335389 | 0.252628 |
| CNOT6   | 0.610074 | 0.312208 | 1.192124 | 0.148231 |
| BTNL8   | 1.256701 | 0.151611 | 10.41678 | 0.832303 |
| TTC1    | 0.871316 | 0.366649 | 2.070623 | 0.755112 |
| MSH3    | 0.094245 | 0.015632 | 0.56821  | 0.009977 |
| RASGRF2 | 0.546559 | 0.038994 | 7.660755 | 0.65382  |
| CCNG1   | 1.24098  | 0.609576 | 2.526398 | 0.551676 |
| POLR3G  | 0.494667 | 0.053169 | 4.602263 | 0.536232 |
| LMNB1   | 0.691587 | 0.412974 | 1.158164 | 0.160977 |
| ARRDC3  | 1.638047 | 0.791219 | 3.391222 | 0.183777 |
| GOLPH3  | 1.160067 | 0.678788 | 1.982587 | 0.587125 |

|          |          |          |          |          |
|----------|----------|----------|----------|----------|
| SUB1     | 0.738438 | 0.413954 | 1.317274 | 0.304513 |
| NPR3     | 0.935734 | 0.591083 | 1.481347 | 0.776868 |
| FAM172A  | 0.429786 | 0.177704 | 1.039456 | 0.060919 |
| SLC27A6  | 0.787383 | 0.209156 | 2.964152 | 0.72377  |
| LNPEP    | 1.395773 | 0.083516 | 23.32697 | 0.816484 |
| PDE4D    | 0.830347 | 0.435514 | 1.583131 | 0.572309 |
| RAD1     | 1.690442 | 0.135608 | 21.07241 | 0.683393 |
| BRIX1    | 0.373284 | 0.17497  | 0.796369 | 0.010805 |
| PRLR     | 2.511801 | 0.52842  | 11.93964 | 0.246874 |
| SLC12A7  | 0.236234 | 0.018436 | 3.027021 | 0.267501 |
| RAD50    | 0.246141 | 0.046952 | 1.290359 | 0.097238 |
| ST8SIA4  | 1.433784 | 0.4715   | 4.359988 | 0.525433 |
| GNPDA1   | 1.311744 | 0.989976 | 1.738095 | 0.058785 |
| PCDH12   | 1.084498 | 0.171007 | 6.877708 | 0.93141  |
| SKP1     | 0.491137 | 0.255346 | 0.944661 | 0.033126 |
| NUP155   | 0.138222 | 0.028933 | 0.660343 | 0.013136 |
| PPP2CA   | 0.610472 | 0.25612  | 1.455083 | 0.265436 |
| NR3C1    | 1.157465 | 0.200042 | 6.697217 | 0.870307 |
| PPWD1    | 0.731104 | 0.400037 | 1.33616  | 0.308673 |
| LIFR     | 0.309465 | 0.03777  | 2.535571 | 0.27441  |
| TRIM23   | 0.288531 | 0.032788 | 2.539053 | 0.26263  |
| SEC24A   | 1.145779 | 0.518803 | 2.53046  | 0.736392 |
| TXNDC15  | 1.959245 | 0.86553  | 4.435017 | 0.106634 |
| TTC33    | 0.907916 | 0.448838 | 1.836546 | 0.788115 |
| TCERG1   | 0.180428 | 0.058334 | 0.558065 | 0.002955 |
| DPYSL3   | 1.244024 | 1.036097 | 1.493679 | 0.019285 |
| SMAD5    | 0.530026 | 0.181393 | 1.548723 | 0.245889 |
| CSNK1A1  | 0.657136 | 0.192609 | 2.241991 | 0.502506 |
| ERGIC1   | 1.687061 | 0.705874 | 4.03213  | 0.23942  |
| PDGFRB   | 1.752276 | 1.159477 | 2.648153 | 0.007762 |
| ATP6V0E1 | 1.048316 | 0.468971 | 2.343354 | 0.90847  |
| BNIP1    | 0.689804 | 0.254718 | 1.868059 | 0.465042 |
| CPEB4    | 1.279726 | 0.777384 | 2.106679 | 0.332142 |
| HRH2     | 1.824763 | 0.292557 | 11.38157 | 0.519593 |
| DBN1     | 1.123846 | 0.718623 | 1.757569 | 0.608831 |
| ZNF346   | 0.235074 | 0.091322 | 0.605112 | 0.002689 |
| UNC5A    | 0.245834 | 0.014409 | 4.194149 | 0.332339 |
| EHHADH   | 0.631448 | 0.18784  | 2.122695 | 0.457361 |
| SMC4     | 0.820265 | 0.36867  | 1.825031 | 0.627271 |
| ACTR8    | 0.177501 | 0.048072 | 0.655409 | 0.00949  |
| TBCCD1   | 0.831477 | 0.182853 | 3.780924 | 0.811236 |
| CRBN     | 0.965206 | 0.500094 | 1.862896 | 0.915933 |
| BCL6     | 1.105429 | 0.726161 | 1.682784 | 0.640139 |
| HGD      | 3.692263 | 1.079892 | 12.62422 | 0.037297 |
| ARL6     | 0.063231 | 0.000919 | 4.348459 | 0.20088  |
| NPHP3    | 0.658627 | 0.367373 | 1.18079  | 0.160908 |
| CD86     | 1.416807 | 1.004562 | 1.998228 | 0.047044 |
| AMOTL2   | 0.409281 | 0.112775 | 1.485357 | 0.174349 |
| NIT2     | 0.311703 | 0.14779  | 0.657411 | 0.002202 |
| FAM162A  | 0.650513 | 0.357879 | 1.18243  | 0.158438 |
| OGG1     | 0.358645 | 0.14478  | 0.888428 | 0.026721 |
| KPNA1    | 0.831349 | 0.33607  | 2.056541 | 0.689381 |
| PCCB     | 0.438014 | 0.215432 | 0.890565 | 0.022603 |
| UBE3A    | 0.441259 | 0.155151 | 1.254969 | 0.125005 |
| ARMC8    | 0.139873 | 0.032344 | 0.604883 | 0.008467 |
| CEP70    | 0.944864 | 0.542487 | 1.645694 | 0.841223 |
| RBP2     | 0.121932 | 0.01426  | 1.042633 | 0.054627 |
| SLC25A36 | 0.645686 | 0.397597 | 1.048576 | 0.077023 |



|          |          |          |          |          |
|----------|----------|----------|----------|----------|
| GRK7     | 5.968372 | 0.63189  | 56.37291 | 0.118926 |
| RNF7     | 1.094809 | 0.0956   | 12.5377  | 0.941954 |
| TFDP2    | 0.694657 | 0.390825 | 1.234693 | 0.214404 |
| XRN1     | 0.565886 | 0.209725 | 1.526887 | 0.260904 |
| KAT2B    | 0.899257 | 0.633809 | 1.275877 | 0.551883 |
| SERPINI2 | 1.334063 | 0.766863 | 2.320785 | 0.307584 |
| PDCD10   | 0.946282 | 0.374469 | 2.391249 | 0.907068 |
| PFKFB4   | 1.116828 | 0.800138 | 1.558862 | 0.51606  |
| COL7A1   | 0.554567 | 0.195131 | 1.576098 | 0.268605 |
| PRKAR2A  | 0.762121 | 0.245358 | 2.367267 | 0.638524 |
| HES1     | 1.413855 | 0.719296 | 2.779085 | 0.315187 |
| USP4     | 0.754095 | 0.198557 | 2.863963 | 0.678482 |
| ACAP2    | 0.966245 | 0.54729  | 1.705913 | 0.905753 |
| ECT2     | 0.603477 | 0.326343 | 1.115956 | 0.107358 |
| GNAT1    | 1.014538 | 0.017344 | 59.34522 | 0.994453 |
| GNAI2    | 1.817803 | 0.883307 | 3.740951 | 0.104591 |
| TFG      | 0.5751   | 0.170181 | 1.943454 | 0.373227 |
| USP9Y    | 0.439647 | 0.156317 | 1.236525 | 0.119335 |
| HYAL1    | 0.009699 | 6.21E-05 | 1.514669 | 0.072042 |
| TUSC2    | 1.501017 | 0.547586 | 4.114519 | 0.429871 |
| RPL24    | 1.180621 | 0.354288 | 3.934267 | 0.78688  |
| CYB561D2 | 1.356925 | 0.628416 | 2.929981 | 0.437076 |
| FXR1     | 0.210236 | 0.08538  | 0.517676 | 0.000694 |
| CBLB     | 1.060286 | 0.460618 | 2.440647 | 0.890544 |
| BBX      | 0.926652 | 0.512289 | 1.676172 | 0.801111 |
| IFT57    | 0.768812 | 0.344786 | 1.714314 | 0.520502 |
| GNB4     | 1.728079 | 0.638621 | 4.676101 | 0.281473 |
| HHLA2    | 1.598384 | 0.176912 | 14.44121 | 0.676229 |
| IQCG     | 0.911946 | 0.343994 | 2.417617 | 0.852995 |
| GBE1     | 0.675123 | 0.381626 | 1.194339 | 0.177083 |
| UMPS     | 2.11648  | 0.564178 | 7.939843 | 0.266375 |
| NCBP2    | 0.352132 | 0.117279 | 1.057281 | 0.062791 |
| SNX4     | 0.670288 | 0.317996 | 1.412865 | 0.293023 |
| FRMD4B   | 1.54131  | 0.319138 | 7.443912 | 0.59026  |
| SLC41A3  | 0.858478 | 0.225897 | 3.262487 | 0.822746 |
| PLXNA1   | 1.430168 | 0.665466 | 3.073607 | 0.359348 |
| ATP6V1A  | 0.9351   | 0.513407 | 1.703155 | 0.826379 |
| ABTB1    | 1.016822 | 0.61732  | 1.674865 | 0.947762 |
| PODXL2   | 1.35022  | 0.807618 | 2.257373 | 0.252161 |
| UPK1B    | 2.108263 | 0.314982 | 14.11118 | 0.441918 |
| CSPG5    | 0.230852 | 0.021986 | 2.423925 | 0.221724 |
| KLHL18   | 0.895107 | 0.335385 | 2.388948 | 0.824903 |
| SCAP     | 0.596678 | 0.303744 | 1.172119 | 0.133885 |
| NEK11    | 2.664191 | 0.718777 | 9.874981 | 0.142657 |
| MRPL3    | 0.639459 | 0.303887 | 1.34559  | 0.238811 |
| PLSCR4   | 1.180016 | 0.58437  | 2.382803 | 0.644328 |
| HEMK1    | 0.286514 | 0.086424 | 0.949852 | 0.040944 |
| CISH     | 2.11719  | 1.450549 | 3.090205 | 0.000101 |
| MAPKAPK  | 1.200397 | 0.510489 | 2.822688 | 0.675447 |
| ACVR2B   | 0.458114 | 0.010948 | 19.16909 | 0.681981 |
| WDR48    | 0.67983  | 0.369636 | 1.250337 | 0.214484 |
| COMMD2   | 1.013396 | 0.464534 | 2.210759 | 0.973326 |
| GORASP1  | 1.03587  | 0.454014 | 2.363418 | 0.933266 |
| RRP9     | 1.066472 | 0.480057 | 2.369226 | 0.874438 |
| ABCC5    | 0.253108 | 0.098811 | 0.64835  | 0.004198 |
| ABHD14B  | 2.696457 | 1.193164 | 6.093779 | 0.017102 |
| EIF1B    | 0.658815 | 0.329745 | 1.316279 | 0.237303 |
| KLHL24   | 0.942371 | 0.560252 | 1.585113 | 0.822976 |

|         |          |          |          |          |
|---------|----------|----------|----------|----------|
| PLCH1   | 0.656459 | 0.129894 | 3.317606 | 0.610627 |
| VIPR1   | 1.773605 | 1.207417 | 2.605294 | 0.003493 |
| DNAH1   | 1.002107 | 0.436891 | 2.298555 | 0.996035 |
| SSR3    | 0.711347 | 0.272546 | 1.856618 | 0.48653  |
| ZBTB47  | 2.304601 | 0.747031 | 7.109725 | 0.146346 |
| NKTR    | 0.634003 | 0.440894 | 0.911693 | 0.01394  |
| CLCN2   | 1.802236 | 0.285261 | 11.38627 | 0.53113  |
| FOXP1   | 1.102715 | 0.282219 | 4.308642 | 0.888175 |
| EIF4G1  | 3.68701  | 0.846838 | 16.05272 | 0.082129 |
| SPCS1   | 1.04068  | 0.296349 | 3.654517 | 0.950389 |
| NEK4    | 0.108263 | 0.013057 | 0.897695 | 0.039402 |
| SLC4A3  | 1.214097 | 0.167776 | 8.785725 | 0.847647 |
| INO80D  | 0.756986 | 0.416309 | 1.37645  | 0.361441 |
| EEF1B2  | 0.708497 | 0.280511 | 1.789478 | 0.466015 |
| ADAM23  | 0.094597 | 0.00521  | 1.717644 | 0.110881 |
| DGUOK   | 0.083531 | 0.009919 | 0.703418 | 0.022397 |
| LMAN2L  | 0.62732  | 0.326818 | 1.204128 | 0.161031 |
| RTKN    | 1.568618 | 0.397146 | 6.195605 | 0.520644 |
| TTL     | 0.39125  | 0.134101 | 1.141499 | 0.085848 |
| IL1A    | 1.501885 | 0.7455   | 3.025696 | 0.255073 |
| CCL20   | 1.048576 | 0.729391 | 1.507436 | 0.797857 |
| PIKFYVE | 0.113269 | 0.003762 | 3.410237 | 0.209927 |
| FAHD2A  | 0.67438  | 0.239689 | 1.897416 | 0.455406 |
| NCL     | 0.323071 | 0.14852  | 0.702765 | 0.004378 |
| ACTR1B  | 1.717274 | 0.768777 | 3.836003 | 0.187271 |
| SLC35F5 | 0.509052 | 0.188697 | 1.373277 | 0.182366 |
| ZAP70   | 0.636973 | 0.232483 | 1.745228 | 0.380455 |
| ACTR3   | 1.023082 | 0.605155 | 1.729632 | 0.932122 |
| STEAP3  | 1.002638 | 0.216778 | 4.637382 | 0.99731  |
| EPB41L5 | 1.389029 | 0.23123  | 8.344073 | 0.719434 |
| TFCP2L1 | 3.445158 | 0.605205 | 19.61173 | 0.163312 |
| TP53I3  | 2.081497 | 0.877173 | 4.939308 | 0.096367 |
| DNAJC27 | 0.388023 | 0.205262 | 0.733512 | 0.00357  |
| POMC    | 1.085785 | 0.75854  | 1.55421  | 0.652884 |
| STAM2   | 1.876822 | 0.62292  | 5.654759 | 0.263222 |
| OTOF    | 0.421821 | 0.07144  | 2.490654 | 0.340725 |
| GPD2    | 0.436236 | 0.077489 | 2.45587  | 0.346754 |
| CENPA   | 0.877044 | 0.473603 | 1.624157 | 0.676449 |
| CYTIP   | 1.175902 | 0.694498 | 1.990999 | 0.546454 |
| ACVR1   | 1.65022  | 1.035373 | 2.630191 | 0.035194 |
| TANC1   | 1.219402 | 0.636325 | 2.336764 | 0.550007 |
| SLC30A3 | 1.846269 | 0.178144 | 19.13462 | 0.607287 |
| MPV17   | 0.845922 | 0.402485 | 1.777914 | 0.658826 |
| GTF3C2  | 0.508795 | 0.207008 | 1.250541 | 0.140835 |
| EIF2B4  | 0.31264  | 0.074179 | 1.317671 | 0.113168 |
| NRBP1   | 1.268742 | 0.466536 | 3.450336 | 0.640991 |
| ITGA4   | 0.574318 | 0.332992 | 0.990537 | 0.046135 |
| PSMD14  | 0.344016 | 0.142548 | 0.830229 | 0.017603 |
| SNX17   | 0.919464 | 0.442375 | 1.911081 | 0.822032 |
| ASB3    | 0.389828 | 0.130036 | 1.168642 | 0.092617 |
| PPM1G   | 0.315501 | 0.085021 | 1.170776 | 0.084654 |
| REEP6   | 0.890178 | 0.383968 | 2.063755 | 0.786266 |
| PCSK4   | 0.564454 | 0.154147 | 2.06691  | 0.387814 |
| APC2    | 0.814317 | 0.122663 | 5.405948 | 0.831575 |
| IFIH1   | 1.497388 | 0.824363 | 2.71988  | 0.18493  |
| RPS15   | 1.032036 | 0.399474 | 2.666254 | 0.948081 |
| GCA     | 0.989376 | 0.725906 | 1.348473 | 0.946099 |
| INO80B  | 1.79269  | 0.757045 | 4.245106 | 0.184461 |

|         |          |          |          |          |
|---------|----------|----------|----------|----------|
| MOGS    | 0.865421 | 0.352775 | 2.123036 | 0.752241 |
| TTC31   | 0.624303 | 0.234248 | 1.663849 | 0.346203 |
| NDUFS7  | 1.552616 | 0.809265 | 2.978774 | 0.185712 |
| PCGF1   | 5.320615 | 1.55321  | 18.2261  | 0.007794 |
| CLIP4   | 1.734083 | 0.949137 | 3.168187 | 0.073422 |
| SPTBN1  | 0.982168 | 0.324014 | 2.977197 | 0.974631 |
| AUP1    | 0.48712  | 0.080075 | 2.963279 | 0.434944 |
| RTN4    | 1.549146 | 0.509374 | 4.711378 | 0.440538 |
| HTRA2   | 1.071031 | 0.528105 | 2.17212  | 0.849143 |
| LOXL3   | 0.964428 | 0.487892 | 1.906409 | 0.91703  |
| GALNT3  | 0.981137 | 0.455556 | 2.113084 | 0.961197 |
| POLE4   | 0.844676 | 0.480136 | 1.485991 | 0.558085 |
| TACR1   | 0.041025 | 0.000605 | 2.783614 | 0.13776  |
| CCDC88A | 0.748331 | 0.333664 | 1.678333 | 0.481753 |
| MRPL19  | 0.665549 | 0.311173 | 1.420959 | 0.292757 |
| LANCL1  | 0.636277 | 0.346953 | 1.166869 | 0.143959 |
| WDR75   | 0.434052 | 0.178168 | 1.057438 | 0.066205 |
| EFEMP1  | 0.186524 | 0.006751 | 5.153361 | 0.321364 |
| FANCL   | 0.282152 | 0.08292  | 0.96008  | 0.04285  |
| FN1     | 3.434423 | 0.790493 | 14.9214  | 0.099706 |
| STAT1   | 1.031511 | 0.630087 | 1.688681 | 0.901821 |
| GLS     | 0.582359 | 0.31217  | 1.086405 | 0.089231 |
| PAPOLG  | 3.69881  | 0.72269  | 18.93094 | 0.116389 |
| PECR    | 1.036745 | 0.635501 | 1.691325 | 0.885098 |
| UNC50   | 1.061803 | 0.502087 | 2.245482 | 0.875296 |
| IGFBP2  | 1.232193 | 1.012826 | 1.499072 | 0.036855 |
| ELMOD3  | 0.184841 | 0.040814 | 0.837122 | 0.028477 |
| IGFBP5  | 1.650336 | 0.782721 | 3.479669 | 0.188075 |
| USP34   | 0.851294 | 0.461016 | 1.571966 | 0.60691  |
| KCNJ13  | 3.741117 | 0.452819 | 30.90847 | 0.220722 |
| CCT4    | 0.475984 | 0.183121 | 1.237216 | 0.127707 |
| GGCX    | 0.820145 | 0.273632 | 2.458182 | 0.723322 |
| EHBP1   | 0.528622 | 0.274827 | 1.016787 | 0.056122 |
| TXNDC9  | 1.242769 | 0.745555 | 2.071577 | 0.404463 |
| COQ10B  | 0.640565 | 0.39042  | 1.050979 | 0.077877 |
| GNLY    | 0.923962 | 0.648108 | 1.317229 | 0.662038 |
| SF3B1   | 0.407925 | 0.15712  | 1.059081 | 0.065469 |
| ST3GAL5 | 1.640049 | 0.904202 | 2.974734 | 0.103422 |
| CHST10  | 1.043616 | 0.500151 | 2.177611 | 0.909429 |
| PDCL3   | 0.299662 | 0.114911 | 0.781449 | 0.013731 |
| HSPE1   | 0.882402 | 0.343564 | 2.266341 | 0.7949   |
| PLCD4   | 0.095428 | 0.007769 | 1.172217 | 0.066387 |
| ZNF142  | 0.941308 | 0.328184 | 2.699891 | 0.910422 |
| IL1R2   | 2.239871 | 0.90856  | 5.521947 | 0.079831 |
| IL1R1   | 2.602288 | 1.074671 | 6.301371 | 0.034043 |
| IL1RL1  | 0.47069  | 0.060228 | 3.67853  | 0.472552 |
| IL18R1  | 0.438603 | 0.213896 | 0.899376 | 0.024486 |
| IL18RAP | 0.793223 | 0.581031 | 1.082908 | 0.144708 |
| FHL2    | 0.757353 | 0.357125 | 1.606113 | 0.468688 |
| UXS1    | 1.861697 | 0.290557 | 11.92851 | 0.511958 |
| ABCB6   | 0.925997 | 0.601949 | 1.424492 | 0.726435 |
| STK16   | 1.904483 | 0.312037 | 11.62378 | 0.485158 |
| HDLBP   | 0.341542 | 0.038161 | 3.056793 | 0.336694 |
| PPP1R7  | 2.817397 | 0.934917 | 8.490305 | 0.065711 |
| PASK    | 1.34326  | 0.493465 | 3.656482 | 0.563552 |
| STK25   | 1.348737 | 0.52843  | 3.442442 | 0.531462 |
| TPO     | 0.33686  | 0.011093 | 10.2297  | 0.532116 |
| PROC    | 3.62268  | 1.435675 | 9.141211 | 0.006416 |

|          |          |          |          |          |
|----------|----------|----------|----------|----------|
| ID2      | 1.103432 | 0.81968  | 1.485411 | 0.516372 |
| TAF1B    | 0.826447 | 0.313098 | 2.181472 | 0.700299 |
| HPCAL1   | 1.636098 | 0.700812 | 3.819594 | 0.255077 |
| ODC1     | 0.859433 | 0.505355 | 1.461598 | 0.576081 |
| BIRC6    | 0.703984 | 0.245296 | 2.02039  | 0.514065 |
| NOL10    | 0.80434  | 0.212726 | 3.041293 | 0.748316 |
| PLEKHB2  | 0.625881 | 0.22578  | 1.734998 | 0.367709 |
| GORASP2  | 0.571995 | 0.214629 | 1.524386 | 0.264002 |
| STRN     | 2.208656 | 0.172372 | 28.30016 | 0.542576 |
| CEBPZ    | 1.322152 | 0.555488 | 3.14694  | 0.527922 |
| PRKD3    | 1.323487 | 0.285774 | 6.129373 | 0.720066 |
| QPCT     | 1.130626 | 0.706418 | 1.809575 | 0.608912 |
| RAB3GAP1 | 0.600654 | 0.275399 | 1.310047 | 0.20013  |
| SLC25A12 | 0.580587 | 0.180552 | 1.86695  | 0.361576 |
| DLX2     | 0.59037  | 0.081467 | 4.278239 | 0.601998 |
| LCT      | 2.056258 | 1.335409 | 3.166217 | 0.001063 |
| SDC1     | 1.445933 | 0.162529 | 12.86368 | 0.740888 |
| PLCL1    | 0.784836 | 0.140351 | 4.388748 | 0.782648 |
| SLC1A4   | 0.952379 | 0.427158 | 2.123399 | 0.905063 |
| SOS1     | 0.661009 | 0.253989 | 1.72028  | 0.396257 |
| KYNU     | 1.206373 | 0.90643  | 1.605567 | 0.198309 |
| WIPF1    | 0.662441 | 0.182383 | 2.406085 | 0.531453 |
| COX7A2L  | 0.99791  | 0.478035 | 2.083164 | 0.995555 |
| PNO1     | 0.455575 | 0.184584 | 1.124411 | 0.088086 |
| PLEK     | 0.754269 | 0.408382 | 1.393113 | 0.367662 |
| RND3     | 4.044135 | 0.621158 | 26.3299  | 0.143795 |
| ATF2     | 0.359368 | 0.147897 | 0.873216 | 0.023868 |
| THADA    | 0.208969 | 0.034507 | 1.265504 | 0.088434 |
| AAK1     | 0.65354  | 0.130334 | 3.277073 | 0.605107 |
| TRAK2    | 1.000793 | 0.685975 | 1.460092 | 0.996718 |
| TIA1     | 0.404141 | 0.20534  | 0.795413 | 0.008728 |
| PCYOX1   | 0.918405 | 0.349416 | 2.413933 | 0.862941 |
| KISS1R   | 1.174541 | 0.49947  | 2.762023 | 0.712312 |
| EPAS1    | 1.120725 | 0.548646 | 2.289319 | 0.754472 |
| ARID3A   | 0.984125 | 0.497078 | 1.948391 | 0.963374 |
| SUMO1    | 1.159965 | 0.46181  | 2.913575 | 0.752163 |
| GRIN3B   | 1.062633 | 0.429605 | 2.628434 | 0.895401 |
| NFE2L2   | 1.649677 | 0.909146 | 2.993393 | 0.099631 |
| MSH6     | 0.442044 | 0.245822 | 0.794896 | 0.006398 |
| PLEKHA3  | 0.490437 | 0.19806  | 1.214423 | 0.123552 |
| SPR      | 1.62143  | 0.71122  | 3.696514 | 0.250357 |
| EPHA4    | 1.157413 | 0.37405  | 3.581356 | 0.799758 |
| PARD3B   | 1.379599 | 0.030909 | 61.57681 | 0.868125 |
| FARSB    | 1.121125 | 0.129516 | 9.704733 | 0.917307 |
| ALMS1    | 1.852127 | 0.321216 | 10.67932 | 0.490506 |
| BCL9     | 4.194069 | 1.943835 | 9.049231 | 0.000258 |
| DHCR24   | 1.331925 | 0.879887 | 2.016196 | 0.17541  |
| DNAJC16  | 1.199973 | 0.172777 | 8.334083 | 0.853731 |
| MORN1    | 1.244768 | 0.194871 | 7.951158 | 0.81699  |
| GPX7     | 0.988914 | 0.654419 | 1.494382 | 0.957795 |
| CACYBP   | 0.131566 | 0.02813  | 0.615345 | 0.00997  |
| SCP2     | 0.546905 | 0.164139 | 1.822266 | 0.325731 |
| TPSG1    | 0.379763 | 0.073253 | 1.968787 | 0.248849 |
| RALGPS2  | 0.138074 | 0.016749 | 1.138228 | 0.065817 |
| ANGPTL1  | 6.622957 | 0.157853 | 277.8767 | 0.321374 |
| FAM20B   | 0.519192 | 0.260295 | 1.035594 | 0.062789 |
| TMEM59   | 1.167481 | 0.54373  | 2.506783 | 0.691242 |
| LRRC42   | 0.357383 | 0.13218  | 0.966274 | 0.042604 |

|          |          |          |          |          |
|----------|----------|----------|----------|----------|
| MRPL37   | 0.885383 | 0.397113 | 1.974008 | 0.766028 |
| ICMT     | 1.190173 | 0.270133 | 5.243768 | 0.818012 |
| RPL22    | 0.592177 | 0.344562 | 1.017735 | 0.057915 |
| CHD5     | 0.851702 | 0.168166 | 4.313574 | 0.84623  |
| QSOX1    | 1.678608 | 0.878884 | 3.206025 | 0.116668 |
| STXBP3   | 0.682569 | 0.363293 | 1.282436 | 0.235284 |
| PHF13    | 1.494814 | 0.778784 | 2.869175 | 0.226891 |
| ERRFI1   | 0.719553 | 0.241455 | 2.144318 | 0.554684 |
| PARK7    | 0.496521 | 0.247928 | 0.994374 | 0.048168 |
| AMPD2    | 0.114393 | 0.004673 | 2.800022 | 0.183886 |
| MECR     | 0.200288 | 0.047125 | 0.85125  | 0.029398 |
| KCNC4    | 1.220739 | 0.014985 | 99.44534 | 0.929206 |
| EDEM3    | 0.968565 | 0.270377 | 3.469665 | 0.960872 |
| WDR77    | 0.307121 | 0.08237  | 1.14511  | 0.07872  |
| RAP1A    | 0.498955 | 0.117499 | 2.118787 | 0.346039 |
| HDAC1    | 0.573652 | 0.327959 | 1.003407 | 0.05141  |
| CAPZA1   | 1.399356 | 0.761797 | 2.570495 | 0.278799 |
| S100PBP  | 0.121469 | 0.027504 | 0.536451 | 0.005407 |
| RNF19B   | 2.195617 | 1.285764 | 3.749313 | 0.003969 |
| SCAMP3   | 0.974276 | 0.308597 | 3.075902 | 0.964563 |
| TRIM62   | 14.59456 | 2.583553 | 82.44502 | 0.00241  |
| ASH1L    | 1.117228 | 0.186937 | 6.677119 | 0.903277 |
| DLGAP3   | 14.08053 | 2.199814 | 90.12636 | 0.005233 |
| SFPQ     | 0.905603 | 0.426434 | 1.923195 | 0.796377 |
| RHOA     | 1.171181 | 0.876603 | 1.564749 | 0.285077 |
| GON4L    | 1.051444 | 0.18404  | 6.007014 | 0.95501  |
| ARHGEF2  | 0.977023 | 0.41507  | 2.299789 | 0.957557 |
| MEF2D    | 1.167982 | 0.621018 | 2.196686 | 0.62995  |
| DOCK7    | 0.771381 | 0.203407 | 2.925306 | 0.702707 |
| SRM      | 0.850311 | 0.500166 | 1.445578 | 0.549239 |
| DLEU2L   | 0.771774 | 0.296837 | 2.006609 | 0.595143 |
| FBXO6    | 1.251915 | 0.780215 | 2.008793 | 0.351722 |
| MAD2L2   | 2.114746 | 0.991281 | 4.511486 | 0.052707 |
| DNAJC6   | 5.631728 | 0.12277  | 258.3389 | 0.37591  |
| LEPR     | 1.176213 | 0.391948 | 3.52975  | 0.772224 |
| IVNS1ABP | 0.44369  | 0.212998 | 0.924236 | 0.029977 |
| KIAA2013 | 1.479764 | 0.690917 | 3.169267 | 0.313225 |
| MFN2     | 1.540959 | 0.695303 | 3.415137 | 0.2869   |
| PRG4     | 0.490018 | 0.010591 | 22.67259 | 0.715406 |
| MIIP     | 1.129159 | 0.691353 | 1.844211 | 0.627455 |
| SMG7     | 0.704693 | 0.207929 | 2.388279 | 0.574108 |
| NCF2     | 1.152499 | 0.924626 | 1.43653  | 0.206677 |
| PDC      | 4.925127 | 0.046064 | 526.5924 | 0.503598 |
| SLC35D1  | 0.612632 | 0.05509  | 6.812819 | 0.690122 |
| PLA2G4A  | 1.465424 | 0.707821 | 3.033911 | 0.303365 |
| GADD45A  | 1.063784 | 0.704559 | 1.606164 | 0.768653 |
| PRDM2    | 2.807743 | 0.193782 | 40.68198 | 0.449125 |
| RGS2     | 1.20013  | 0.898838 | 1.602417 | 0.216138 |
| UCHL5    | 0.193574 | 0.071986 | 0.520533 | 0.001139 |
| BCAS2    | 1.353484 | 0.589159 | 3.109383 | 0.475686 |
| CTH      | 0.489549 | 0.058536 | 4.094219 | 0.509796 |
| AGMAT    | 1.208011 | 0.429124 | 3.400632 | 0.720444 |
| OLFML3   | 0.559146 | 0.063532 | 4.921063 | 0.600348 |
| PLEKHM2  | 1.575291 | 0.674979 | 3.676472 | 0.293286 |
| CRYZ     | 0.787726 | 0.460471 | 1.34756  | 0.383737 |
| PHTF1    | 0.315591 | 0.143685 | 0.693165 | 0.004067 |
| ZBTB17   | 1.624509 | 0.779639 | 3.384937 | 0.195185 |
| CD58     | 0.684421 | 0.371322 | 1.261527 | 0.224238 |

|          |          |          |          |          |
|----------|----------|----------|----------|----------|
| TFAP2E   | 6.151028 | 0.931574 | 40.6142  | 0.059246 |
| CD2      | 1.117369 | 0.786794 | 1.586838 | 0.53519  |
| TTF2     | 0.424848 | 0.231895 | 0.778352 | 0.005586 |
| NR5A2    | 2.221214 | 0.898136 | 5.493366 | 0.084092 |
| KIF21B   | 0.809377 | 0.171701 | 3.815308 | 0.789208 |
| TMEM9    | 1.650133 | 1.041304 | 2.614931 | 0.032985 |
| MAP7D1   | 3.376036 | 1.530591 | 7.446547 | 0.002573 |
| WARS2    | 0.855699 | 0.331726 | 2.207305 | 0.74721  |
| OSCP1    | 0.9908   | 0.264281 | 3.714544 | 0.989063 |
| MRPS15   | 0.388594 | 0.167355 | 0.902304 | 0.027868 |
| EXOC8    | 1.025578 | 0.484672 | 2.170147 | 0.947344 |
| GNPAT    | 0.869666 | 0.449616 | 1.682141 | 0.678229 |
| TSNAX    | 0.712737 | 0.390237 | 1.301759 | 0.270514 |
| RRAGC    | 0.45847  | 0.187098 | 1.123448 | 0.088118 |
| NID1     | 1.606261 | 0.597709 | 4.316604 | 0.347426 |
| LGALS8   | 0.312188 | 0.070528 | 1.381877 | 0.125075 |
| NT5C1A   | 1.514975 | 0.164698 | 13.93552 | 0.713694 |
| HPCAL4   | 2.763026 | 0.640866 | 11.9125  | 0.172826 |
| MTR      | 0.091022 | 0.021784 | 0.380329 | 0.00102  |
| BMP8B    | 1.222682 | 0.747293 | 2.000491 | 0.423512 |
| SIPA1L2  | 1.224891 | 0.832221 | 1.802836 | 0.303644 |
| RLF      | 0.630779 | 0.317841 | 1.25183  | 0.187609 |
| KMO      | 3.72076  | 1.269066 | 10.90885 | 0.016659 |
| ZNF684   | 0.617863 | 0.231781 | 1.647051 | 0.335802 |
| KCNQ4    | 0.03718  | 0.000458 | 3.021455 | 0.142332 |
| RIMS3    | 1.402211 | 0.781139 | 2.517088 | 0.257428 |
| AKT3     | 5.726183 | 0.207394 | 158.1007 | 0.302656 |
| ETV3     | 0.594086 | 0.247648 | 1.42516  | 0.243454 |
| ACADM    | 0.410101 | 0.204984 | 0.820469 | 0.011761 |
| SLAMF1   | 1.497428 | 0.822193 | 2.727209 | 0.18686  |
| CD48     | 0.901025 | 0.727939 | 1.115265 | 0.338259 |
| PADI2    | 0.870812 | 0.168667 | 4.495908 | 0.868813 |
| SDHB     | 0.846995 | 0.254825 | 2.81526  | 0.78641  |
| MFAP2    | 4.522852 | 0.419877 | 48.71952 | 0.213352 |
| RPF1     | 0.67198  | 0.29287  | 1.541838 | 0.348166 |
| KDM5B    | 0.719284 | 0.485777 | 1.065033 | 0.099898 |
| UAP1     | 0.984965 | 0.596167 | 1.627323 | 0.952843 |
| CTBS     | 1.329419 | 0.659177 | 2.681156 | 0.426292 |
| KLHL12   | 1.425513 | 0.561667 | 3.61796  | 0.455628 |
| SSX2IP   | 0.743493 | 0.183185 | 3.017617 | 0.678368 |
| ZNHIT6   | 0.443371 | 0.229055 | 0.858214 | 0.015791 |
| PLA2G2D  | 0.552559 | 0.160167 | 1.906272 | 0.347799 |
| RBBP5    | 0.555263 | 0.266817 | 1.155539 | 0.115639 |
| GBP3     | 0.891622 | 0.367617 | 2.16255  | 0.799679 |
| GBP1     | 1.110439 | 0.772875 | 1.595439 | 0.571013 |
| KIF17    | 0.711072 | 0.393151 | 1.286081 | 0.259405 |
| GPR89A   | 0.339054 | 0.141086 | 0.814809 | 0.015616 |
| CD160    | 0.691607 | 0.372083 | 1.28552  | 0.243675 |
| ECE1     | 2.805427 | 0.824544 | 9.545181 | 0.098706 |
| HMGCL    | 1.224756 | 0.596118 | 2.516327 | 0.581048 |
| GALE     | 0.007278 | 0.000297 | 0.178621 | 0.002571 |
| ID3      | 1.382294 | 0.871126 | 2.193412 | 0.169352 |
| CR2      | 2.049532 | 0.189128 | 22.21027 | 0.555034 |
| CD46     | 1.011942 | 0.528247 | 1.938538 | 0.971448 |
| PRPF3    | 0.727221 | 0.380172 | 1.391084 | 0.335789 |
| APH1A    | 2.92949  | 1.394623 | 6.153571 | 0.004535 |
| SLC2A1   | 1.035798 | 0.777219 | 1.380405 | 0.810313 |
| EBNA1BP2 | 0.306647 | 0.162909 | 0.577211 | 0.000249 |

|         |          |          |          |          |
|---------|----------|----------|----------|----------|
| CDC20   | 0.806304 | 0.598302 | 1.08662  | 0.157284 |
| MPL     | 0.859437 | 0.682697 | 1.081932 | 0.197203 |
| ARTN    | 1.020678 | 0.314242 | 3.315226 | 0.972836 |
| IPO13   | 2.720521 | 1.218835 | 6.072386 | 0.014565 |
| ATP6V0B | 1.887427 | 0.870353 | 4.093029 | 0.107753 |
| B4GALT2 | 2.538715 | 0.134065 | 48.07437 | 0.534689 |
| ERI3    | 0.699537 | 0.223432 | 2.190159 | 0.539446 |
| PTCH2   | 1.259343 | 0.100921 | 15.71469 | 0.857891 |
| AKR1A1  | 1.020744 | 0.351197 | 2.966766 | 0.969913 |
| PRDX1   | 1.352377 | 0.729168 | 2.508233 | 0.338169 |
| PIK3R3  | 0.565307 | 0.101143 | 3.159626 | 0.515921 |
| BLZF1   | 0.883852 | 0.475827 | 1.641759 | 0.695955 |
| SLC19A2 | 1.833344 | 0.472282 | 7.11683  | 0.381079 |
| FAAH    | 1.257036 | 0.817054 | 1.93395  | 0.298    |
| NSUN4   | 0.732059 | 0.276047 | 1.941373 | 0.530797 |
| TMED5   | 0.985086 | 0.549489 | 1.765996 | 0.959762 |
| DR1     | 0.711258 | 0.37952  | 1.332969 | 0.287712 |
| CNN3    | 1.126237 | 0.477869 | 2.654304 | 0.785785 |
| F3      | 0.994379 | 0.528786 | 1.869921 | 0.986041 |
| ABCD3   | 0.615215 | 0.205767 | 1.839407 | 0.384664 |
| VAMP4   | 0.82199  | 0.226399 | 2.984402 | 0.765728 |
| DPH5    | 0.698505 | 0.418737 | 1.165192 | 0.169329 |
| FASLG   | 0.175283 | 0.028131 | 1.092184 | 0.062112 |
| PTBP2   | 0.549115 | 0.312758 | 0.964091 | 0.036861 |
| TNFSF4  | 1.054896 | 0.626603 | 1.775936 | 0.840627 |
| PRDX6   | 0.279178 | 0.119446 | 0.652519 | 0.003224 |
| DARS2   | 0.50863  | 0.235771 | 1.097271 | 0.084828 |
| IRF6    | 0.071845 | 0.004151 | 1.243606 | 0.07028  |
| RCAN3   | 1.807065 | 0.701862 | 4.652598 | 0.220094 |
| SYF2    | 0.981552 | 0.292995 | 3.288263 | 0.975919 |
| SLC35A3 | 0.288607 | 0.129345 | 0.643969 | 0.002407 |
| RCOR3   | 0.442678 | 0.230946 | 0.848527 | 0.014099 |
| STMN1   | 0.223868 | 0.087459 | 0.573035 | 0.001802 |
| MAN1C1  | 1.316088 | 0.450931 | 3.841138 | 0.61525  |
| NEK2    | 0.637789 | 0.31434  | 1.294063 | 0.212816 |
| RPS6KA1 | 1.208464 | 0.225615 | 6.472909 | 0.82499  |
| DHDDS   | 1.207676 | 0.394325 | 3.698677 | 0.741076 |
| NENF    | 0.561466 | 0.280155 | 1.125251 | 0.103678 |
| NSL1    | 2.069839 | 0.121107 | 35.37565 | 0.615454 |
| ARID1A  | 0.475708 | 0.132496 | 1.707959 | 0.254628 |
| CENPF   | 0.735969 | 0.442163 | 1.225002 | 0.238282 |
| RPA2    | 0.314774 | 0.127562 | 0.776739 | 0.012135 |
| PPP1R8  | 0.777881 | 0.084197 | 7.186666 | 0.824765 |
| STX12   | 1.467792 | 0.667431 | 3.227921 | 0.339874 |
| SLC5A9  | 2.21761  | 0.395613 | 12.43081 | 0.365164 |
| OSBPL9  | 0.385869 | 0.131436 | 1.132828 | 0.083097 |
| TXNDC12 | 0.798244 | 0.379587 | 1.678648 | 0.552402 |
| RCN2    | 0.200935 | 0.057485 | 0.70236  | 0.011961 |
| MUC5B   | 2.023348 | 0.141594 | 28.91313 | 0.603501 |
| CTSD    | 1.574391 | 1.104424 | 2.244344 | 0.012106 |
| STAG1   | 0.390991 | 0.1383   | 1.105373 | 0.076556 |
| STK11   | 1.841029 | 0.997312 | 3.398524 | 0.051015 |
| MMP8    | 0.972917 | 0.781968 | 1.210493 | 0.805444 |
| APOA1   | 0.965108 | 0.432877 | 2.151727 | 0.930816 |
| KPTN    | 1.213486 | 0.396959 | 3.709569 | 0.734311 |
| RPS25   | 1.22474  | 0.336607 | 4.456194 | 0.758355 |
| KIF14   | 0.405305 | 0.183934 | 0.893104 | 0.025064 |
| DDX59   | 0.89783  | 0.199153 | 4.047636 | 0.888447 |

|          |          |          |          |          |
|----------|----------|----------|----------|----------|
| ATF6     | 0.723506 | 0.355086 | 1.474184 | 0.372805 |
| CRYGD    | 0.854902 | 0.629253 | 1.161469 | 0.31604  |
| MREG     | 0.061587 | 0.005241 | 0.723654 | 0.026606 |
| FASTKD2  | 0.46537  | 0.150995 | 1.434281 | 0.182878 |
| NRP2     | 0.284418 | 0.0083   | 9.746765 | 0.485641 |
| CREB1    | 0.584684 | 0.107913 | 3.167881 | 0.533608 |
| KLF7     | 0.738555 | 0.084884 | 6.425954 | 0.783654 |
| B4GALT6  | 0.566555 | 0.301328 | 1.065233 | 0.077767 |
| CA14     | 0.063315 | 0.004455 | 0.899784 | 0.041555 |
| SPCS2    | 1.193664 | 0.236169 | 6.0331   | 0.830433 |
| USP35    | 2.931905 | 0.548085 | 15.68381 | 0.208693 |
| CASP8AP2 | 0.735868 | 0.077325 | 7.002949 | 0.789616 |
| HMG3     | 0.825474 | 0.349646 | 1.948846 | 0.661674 |
| ANKRD13C | 0.75278  | 0.220769 | 2.566837 | 0.650009 |
| PHF3     | 0.773699 | 0.397845 | 1.504629 | 0.44961  |
| PLAGL1   | 0.505444 | 0.275882 | 0.926027 | 0.027192 |
| FBXO30   | 1.437555 | 0.736783 | 2.804848 | 0.287212 |
| TNFAIP3  | 1.008047 | 0.794978 | 1.278222 | 0.947258 |
| AKAP7    | 1.107219 | 0.443895 | 2.761765 | 0.827115 |
| RAB32    | 0.995368 | 0.651092 | 1.521687 | 0.982897 |
| MYB      | 0.552167 | 0.375284 | 0.812421 | 0.002576 |
| ALDH8A1  | 0.293741 | 0.010453 | 8.254626 | 0.47166  |
| SGK1     | 1.271362 | 0.994273 | 1.625671 | 0.055598 |
| RNF146   | 0.915874 | 0.311044 | 2.69681  | 0.873287 |
| ARG1     | 0.912245 | 0.718858 | 1.157656 | 0.449891 |
| PMFBP1   | 0.080115 | 0.005816 | 1.103501 | 0.059246 |
| FBXL5    | 1.420949 | 0.492852 | 4.096754 | 0.515498 |
| MED28    | 0.724524 | 0.283331 | 1.852725 | 0.501149 |
| SLC16A7  | 0.546696 | 0.060458 | 4.943565 | 0.590922 |
| ZNF430   | 0.545899 | 0.160702 | 1.854399 | 0.331959 |
| VAMP8    | 0.373726 | 0.18577  | 0.751848 | 0.005785 |
| DCLRE1B  | 0.590953 | 0.161004 | 2.169041 | 0.427851 |
| FOXO3    | 1.426383 | 0.534096 | 3.809365 | 0.478578 |
| ARMC2    | 1.589065 | 0.06661  | 37.90916 | 0.774747 |
| GHRH     | 0.354686 | 0.043868 | 2.86773  | 0.331045 |
| RPN2     | 0.649636 | 0.340541 | 1.23928  | 0.190551 |
| TGIF2    | 1.234444 | 0.70727  | 2.154555 | 0.458586 |
| OLFM3    | 0.770939 | 0.048409 | 12.27763 | 0.853849 |
| PKD2     | 0.539137 | 0.25742  | 1.129159 | 0.101441 |
| ABCG2    | 0.389036 | 0.037785 | 4.00556  | 0.427458 |
| SPP1     | 0.84304  | 0.36984  | 1.921684 | 0.68463  |
| STBD1    | 0.804378 | 0.280446 | 2.307121 | 0.685537 |
| CCNI     | 0.48812  | 0.20294  | 1.174045 | 0.109236 |
| RARRES1  | 1.041281 | 0.071685 | 15.12553 | 0.976363 |
| MFSD1    | 0.454526 | 0.247116 | 0.836022 | 0.011213 |
| RAB3GAP2 | 0.826401 | 0.355863 | 1.919107 | 0.65736  |
| PPL      | 3.830587 | 1.135816 | 12.91882 | 0.030366 |
| UBN1     | 0.525819 | 0.16339  | 1.692182 | 0.281081 |
| KLF12    | 0.884519 | 0.298971 | 2.616886 | 0.824524 |
| UCHL3    | 0.325915 | 0.119072 | 0.892066 | 0.029088 |
| HS1BP3   | 2.250887 | 1.336761 | 3.790127 | 0.002275 |
| WDR35    | 0.274384 | 0.058315 | 1.291046 | 0.101699 |
| CCND2    | 0.922678 | 0.644764 | 1.320381 | 0.659869 |
| ELL2     | 1.214458 | 0.732442 | 2.013684 | 0.451392 |
| CYP20A1  | 1.060099 | 0.272202 | 4.128585 | 0.932949 |
| NDUFB3   | 1.059415 | 0.571854 | 1.962669 | 0.854433 |
| GTF3C3   | 0.536436 | 0.277632 | 1.036495 | 0.063839 |
| SATB2    | 1.517962 | 0.623803 | 3.693813 | 0.357643 |



|          |          |          |          |          |
|----------|----------|----------|----------|----------|
| UBE2B    | 0.422848 | 0.101254 | 1.76585  | 0.237899 |
| TRPM6    | 0.273418 | 0.032191 | 2.322332 | 0.23482  |
| KLF9     | 1.172199 | 0.937968 | 1.464924 | 0.162439 |
| TJP2     | 1.307487 | 0.424552 | 4.02665  | 0.640382 |
| ITGB1BP1 | 0.801981 | 0.418326 | 1.537492 | 0.506337 |
| CPSF3    | 0.511123 | 0.254459 | 1.026674 | 0.059296 |
| PIGZ     | 0.662063 | 0.269921 | 1.62391  | 0.367664 |
| SENP5    | 0.230477 | 0.059394 | 0.894357 | 0.033893 |
| CCDC92   | 0.992973 | 0.550202 | 1.792061 | 0.981324 |
| HEATR1   | 0.454399 | 0.253086 | 0.815845 | 0.008252 |
| RAD23B   | 0.489321 | 0.265338 | 0.90238  | 0.022084 |
| FKBP15   | 1.583587 | 0.896115 | 2.798468 | 0.11356  |
| CTNNA1   | 0.725362 | 0.408648 | 1.28754  | 0.272766 |
| SET      | 0.430494 | 0.241516 | 0.767341 | 0.004264 |
| GLE1     | 0.679364 | 0.290399 | 1.589313 | 0.37264  |
| RAB14    | 0.615932 | 0.099809 | 3.801003 | 0.601726 |
| TRIM32   | 3.838311 | 1.837278 | 8.018729 | 0.000346 |
| FBXW2    | 0.170719 | 0.037508 | 0.777026 | 0.02224  |
| PHF19    | 0.854417 | 0.303117 | 2.408406 | 0.766031 |
| NEK6     | 2.426014 | 1.297428 | 4.536316 | 0.005514 |
| BSPRY    | 1.429006 | 0.862066 | 2.368795 | 0.166244 |
| PPP6C    | 1.377039 | 0.449322 | 4.220221 | 0.575547 |
| NDUFA8   | 0.624371 | 0.259008 | 1.505125 | 0.294093 |
| HDHD3    | 1.227519 | 0.680385 | 2.214633 | 0.495946 |
| RBM18    | 0.450526 | 0.124849 | 1.625759 | 0.223319 |
| SLC46A2  | 1.447808 | 1.012789 | 2.069678 | 0.04239  |
| HSDL2    | 0.636962 | 0.327818 | 1.237642 | 0.183233 |
| MAPKAP1  | 0.244491 | 0.049679 | 1.203234 | 0.0832   |
| NR4A3    | 0.679188 | 0.109125 | 4.227234 | 0.678367 |
| INVS     | 0.566803 | 0.121493 | 2.644314 | 0.469989 |
| GALNT12  | 2.147004 | 0.860512 | 5.356842 | 0.101437 |
| DENND1A  | 1.596391 | 0.694695 | 3.668465 | 0.27053  |
| ALG2     | 0.479291 | 0.040539 | 5.666637 | 0.559508 |
| CSF3R    | 1.186848 | 0.665239 | 2.117448 | 0.561942 |
| KDSR     | 0.919242 | 0.340593 | 2.480985 | 0.867979 |
| VPS4B    | 1.088911 | 0.546853 | 2.168275 | 0.808479 |
| ONECUT2  | 2.852669 | 0.004051 | 2008.884 | 0.754029 |
| ZBTB45   | 1.802158 | 0.932757 | 3.481907 | 0.079636 |
| YLPM1    | 0.83402  | 0.138709 | 5.014749 | 0.842809 |
| PROX2    | 0.085837 | 0.006138 | 1.200385 | 0.068112 |
| VSX2     | 0.074125 | 0.005763 | 0.953406 | 0.045871 |
| FCF1     | 0.245022 | 0.078323 | 0.76651  | 0.015652 |
| PGF      | 1.070878 | 0.379184 | 3.024335 | 0.897139 |
| IFI27L2  | 1.582337 | 1.044403 | 2.397342 | 0.030394 |
| NEK9     | 0.037638 | 0.002187 | 0.647611 | 0.023868 |
| ACYP1    | 0.245953 | 0.098212 | 0.615945 | 0.002748 |
| NPC2     | 0.864247 | 0.484846 | 1.540538 | 0.62081  |
| DNAL1    | 0.111936 | 0.009439 | 1.327464 | 0.082658 |
| ACOT2    | 3.304335 | 0.95701  | 11.40911 | 0.058696 |
| LTBP2    | 0.602305 | 0.114511 | 3.167996 | 0.549458 |
| MLH3     | 0.410862 | 0.054658 | 3.088426 | 0.387436 |
| TTLL5    | 0.363996 | 0.158287 | 0.837041 | 0.017377 |
| FLVCR2   | 1.597537 | 1.119947 | 2.27879  | 0.009736 |
| ABCD4    | 0.695678 | 0.021373 | 22.64394 | 0.838191 |
| DLST     | 0.257353 | 0.091363 | 0.724913 | 0.010205 |
| TGFB3    | 1.378134 | 0.322889 | 5.882065 | 0.664885 |
| RBM25    | 0.56054  | 0.33809  | 0.929354 | 0.024833 |
| ALDH6A1  | 0.684225 | 0.34929  | 1.340329 | 0.26867  |

|         |          |          |          |          |
|---------|----------|----------|----------|----------|
| GPR68   | 1.472566 | 0.588724 | 3.683308 | 0.408039 |
| EIF2B2  | 0.814509 | 0.344201 | 1.927434 | 0.640608 |
| COQ6    | 0.623783 | 0.086145 | 4.516858 | 0.640335 |
| ZNF410  | 0.808563 | 0.449601 | 1.454121 | 0.477928 |
| RHOQ    | 1.334804 | 0.457773 | 3.892107 | 0.596877 |
| SUPT7L  | 0.454375 | 0.088115 | 2.343046 | 0.345901 |
| KLHL29  | 1.463537 | 0.348995 | 6.137459 | 0.60257  |
| DNMT3A  | 0.531403 | 0.061584 | 4.585468 | 0.565304 |
| TMEM214 | 1.299758 | 0.566308 | 2.98313  | 0.536235 |
| ATAD2B  | 1.124443 | 0.330799 | 3.822173 | 0.850969 |
| FKBP1B  | 0.428241 | 0.107236 | 1.71016  | 0.229972 |
| ATL2    | 0.611775 | 0.236534 | 1.582306 | 0.310819 |
| YPEL5   | 0.623267 | 0.339669 | 1.143648 | 0.126868 |
| FAM98A  | 1.106741 | 0.597368 | 2.050454 | 0.747181 |
| YIPF4   | 1.977741 | 0.614147 | 6.368926 | 0.253075 |
| AFTPH   | 1.353398 | 0.559326 | 3.274808 | 0.502078 |
| CNRIP1  | 0.477925 | 0.281906 | 0.810245 | 0.006121 |
| BCL11A  | 1.030319 | 0.639202 | 1.660754 | 0.902405 |
| CRIP1   | 0.403778 | 0.195814 | 0.83261  | 0.014046 |
| EPCAM   | 0.840063 | 0.583078 | 1.210311 | 0.349564 |
| SLC17A5 | 2.807449 | 0.058349 | 135.0795 | 0.601453 |
| OGFRL1  | 1.132175 | 0.706728 | 1.813739 | 0.605637 |
| IDE     | 0.356528 | 0.156542 | 0.812001 | 0.014055 |
| ELOVL3  | 1.417202 | 0.376188 | 5.338989 | 0.606375 |
| IFIT3   | 1.384106 | 0.629485 | 3.043362 | 0.418751 |
| NKX2-3  | 1.298542 | 1.030029 | 1.637052 | 0.027085 |
| IFIT2   | 1.870294 | 1.188451 | 2.943325 | 0.006805 |
| GPAM    | 0.608076 | 0.221392 | 1.670148 | 0.33455  |
| CUTC    | 0.297958 | 0.122991 | 0.721831 | 0.007319 |
| CNNM1   | 0.910191 | 0.347512 | 2.383937 | 0.848095 |
| MXI1    | 1.513677 | 0.507595 | 4.51387  | 0.457107 |
| SMNDC1  | 0.684962 | 0.321885 | 1.457579 | 0.326061 |
| HELLS   | 0.132678 | 0.033372 | 0.52749  | 0.004127 |
| TCTN3   | 0.782486 | 0.266338 | 2.298903 | 0.655544 |
| AVPI1   | 1.383551 | 1.0295   | 1.859361 | 0.031339 |
| KCNIP2  | 0.272233 | 0.006113 | 12.12314 | 0.501743 |
| GOT1    | 0.435697 | 0.192166 | 0.987852 | 0.046676 |
| SFRP5   | 2.813941 | 0.599307 | 13.21235 | 0.189814 |
| GNA13   | 1.063679 | 0.562003 | 2.013179 | 0.84958  |
| HOXB8   | 1.101116 | 0.963632 | 1.258216 | 0.156907 |
| HOXB5   | 1.196811 | 1.010598 | 1.417335 | 0.03733  |
| HOXB3   | 1.345791 | 1.002792 | 1.80611  | 0.047868 |
| DUSP1   | 1.422273 | 0.950238 | 2.128793 | 0.086914 |
| PANK3   | 0.514979 | 0.102663 | 2.58323  | 0.419929 |
| TEK     | 1.471785 | 0.423787 | 5.111416 | 0.542911 |
| RCL1    | 0.482621 | 0.232591 | 1.001429 | 0.05045  |
| INSL6   | 3.203159 | 0.097858 | 104.8477 | 0.513061 |
| MLANA   | 2.276882 | 0.170421 | 30.41988 | 0.533874 |
| CD274   | 0.146245 | 0.012618 | 1.694944 | 0.12408  |
| NUP43   | 0.374928 | 0.149689 | 0.939088 | 0.036249 |
| MTHFD1L | 0.447604 | 0.222788 | 0.899285 | 0.023935 |
| PCMT1   | 0.365825 | 0.188141 | 0.711318 | 0.003037 |
| PLEKHG1 | 1.243411 | 0.050953 | 30.34325 | 0.893674 |
| MYCT1   | 2.174987 | 0.239765 | 19.73003 | 0.489794 |
| WDR55   | 0.994376 | 0.309488 | 3.194895 | 0.992443 |
| ARAP3   | 1.285232 | 0.914917 | 1.805433 | 0.147854 |
| SLC25A2 | 0.460892 | 0.029398 | 7.225709 | 0.581213 |
| TNN     | 8.123225 | 1.683166 | 39.20397 | 0.009099 |

|          |          |          |          |          |
|----------|----------|----------|----------|----------|
| MRPS14   | 0.5076   | 0.147977 | 1.7412   | 0.280963 |
| CENPL    | 0.372209 | 0.115125 | 1.20339  | 0.098794 |
| ACAT2    | 0.454524 | 0.137387 | 1.503726 | 0.196465 |
| TCP1     | 0.289885 | 0.13113  | 0.64084  | 0.002218 |
| SNX19    | 0.591851 | 0.237028 | 1.477832 | 0.261266 |
| KCNJ5    | 0.831466 | 0.021435 | 32.25282 | 0.921229 |
| ARR3     | 9.615883 | 0.995087 | 92.92169 | 0.050499 |
| PDZD11   | 97.83426 | 5.577366 | 1716.14  | 0.001713 |
| SLC10A7  | 0.236531 | 0.033282 | 1.680996 | 0.149622 |
| NUDCD1   | 0.552002 | 0.17505  | 1.740688 | 0.31056  |
| ENY2     | 0.521987 | 0.187912 | 1.449988 | 0.212334 |
| MASTL    | 0.466927 | 0.153815 | 1.417422 | 0.178871 |
| KIAA1217 | 0.49629  | 0.052906 | 4.655494 | 0.539624 |
| PLXDC2   | 1.346559 | 0.851615 | 2.129156 | 0.203067 |
| EPC1     | 0.629871 | 0.301671 | 1.315136 | 0.218457 |
| IQSEC3   | 1.568527 | 0.330394 | 7.446503 | 0.571111 |
| CCDC77   | 0.432899 | 0.174416 | 1.074454 | 0.071054 |
| TAF12    | 1.961712 | 0.738499 | 5.210996 | 0.176435 |
| MTRF1    | 0.354817 | 0.1508   | 0.834852 | 0.017624 |
| DNAJC15  | 0.995321 | 0.491116 | 2.01717  | 0.989618 |
| UFM1     | 0.659165 | 0.345573 | 1.257331 | 0.205886 |
| WBP4     | 0.607899 | 0.294813 | 1.253475 | 0.17763  |
| ELF1     | 0.793993 | 0.490634 | 1.284919 | 0.34761  |
| SMAD9    | 1.963228 | 0.204793 | 18.82034 | 0.558587 |
| HSPH1    | 0.788141 | 0.495389 | 1.253897 | 0.31493  |
| KBTBD7   | 0.962315 | 0.428063 | 2.16335  | 0.925951 |
| ALG5     | 0.5531   | 0.222174 | 1.376933 | 0.203154 |
| EXOSC8   | 0.215191 | 0.095084 | 0.487012 | 0.000227 |
| ETF1     | 0.350395 | 0.157351 | 0.78027  | 0.010247 |
| TGFBI    | 1.228082 | 0.990841 | 1.522125 | 0.060662 |
| FAM53C   | 0.747953 | 0.455923 | 1.227036 | 0.250199 |
| SIL1     | 0.969309 | 0.422095 | 2.225942 | 0.941416 |
| PAIP2    | 1.756491 | 0.357777 | 8.623423 | 0.487755 |
| MYOT     | 0.576099 | 0.020402 | 16.26759 | 0.746278 |
| KDM3B    | 0.799076 | 0.350384 | 1.822351 | 0.593867 |
| EGR1     | 1.135298 | 0.901515 | 1.429705 | 0.280742 |
| SERP1    | 1.090482 | 0.558739 | 2.128278 | 0.799583 |
| PLS1     | 1.248482 | 0.557848 | 2.794139 | 0.589241 |
| ZFP30    | 1.725247 | 0.520372 | 5.719898 | 0.372495 |
| NR2C1    | 0.226887 | 0.084623 | 0.608318 | 0.003201 |
| UTP20    | 0.351687 | 0.00732  | 16.89677 | 0.596836 |
| TMPO     | 0.875665 | 0.234038 | 3.276342 | 0.843658 |
| ARL1     | 0.727728 | 0.334513 | 1.583161 | 0.422868 |
| GLT8D2   | 1.157894 | 0.160086 | 8.374987 | 0.884539 |
| SOCS2    | 1.267929 | 1.029519 | 1.561549 | 0.025502 |
| NFYB     | 1.266159 | 0.413846 | 3.873801 | 0.679154 |
| APAF1    | 1.341911 | 0.592292 | 3.040268 | 0.480939 |
| DUSP4    | 2.6674   | 0.338681 | 21.00807 | 0.35147  |
| CLU      | 7.383272 | 0.324037 | 168.2298 | 0.210046 |
| TNFRSF10 | 1.081451 | 0.439361 | 2.661904 | 0.864707 |
| SORBS3   | 4.227137 | 1.665899 | 10.72615 | 0.002412 |
| PTK2B    | 1.692827 | 0.467084 | 6.135224 | 0.422988 |
| CHRNA2   | 5.108641 | 0.565397 | 46.15905 | 0.14644  |
| PPP3CC   | 0.973458 | 0.507771 | 1.866235 | 0.935432 |
| PDLIM2   | 0.245108 | 0.01339  | 4.486739 | 0.343163 |
| EPHX2    | 1.139828 | 0.558965 | 2.324311 | 0.718849 |
| RNF170   | 0.666809 | 0.35303  | 1.259478 | 0.211678 |
| NPPB     | 2.46436  | 0.135672 | 44.76291 | 0.542069 |

|          |          |          |          |          |
|----------|----------|----------|----------|----------|
| UBIAD1   | 0.885458 | 0.354676 | 2.210573 | 0.794396 |
| TARDBP   | 0.350386 | 0.162383 | 0.756057 | 0.007526 |
| TNFRSF8  | 2.628785 | 0.901975 | 7.661534 | 0.076572 |
| ZNF706   | 0.752671 | 0.25867  | 2.190099 | 0.602097 |
| LYPLA1   | 0.75511  | 0.326489 | 1.746436 | 0.511439 |
| CRISPLD1 | 0.573197 | 0.124727 | 2.634194 | 0.474479 |
| COPS5    | 0.496003 | 0.222944 | 1.103502 | 0.085693 |
| RDH10    | 0.793007 | 0.39104  | 1.608171 | 0.520273 |
| EPX      | 0.867973 | 0.437077 | 1.72367  | 0.68583  |
| AKAP1    | 0.737869 | 0.141852 | 3.838168 | 0.717862 |
| COIL     | 0.716965 | 0.290047 | 1.772258 | 0.471152 |
| TRIM25   | 1.317315 | 0.656707 | 2.642457 | 0.437772 |
| SCPEP1   | 1.051048 | 0.844683 | 1.30783  | 0.655283 |
| SPOP     | 0.505536 | 0.143677 | 1.77875  | 0.287905 |
| SLC35B1  | 0.243915 | 0.071865 | 0.827861 | 0.023639 |
| TEX14    | 0.374717 | 0.013998 | 10.03107 | 0.55838  |
| FAM117A  | 1.432546 | 0.847601 | 2.421173 | 0.17945  |
| NCAPH    | 0.176826 | 0.021133 | 1.479558 | 0.109925 |
| MND1     | 0.701789 | 0.378124 | 1.302502 | 0.261717 |
| TRIM6    | 0.531807 | 0.247426 | 1.143044 | 0.105769 |
| ADCY7    | 1.270932 | 0.728171 | 2.218256 | 0.39885  |
| TSHZ3    | 1.406224 | 0.829564 | 2.383742 | 0.2055   |
| ECHDC2   | 0.954953 | 0.770797 | 1.183107 | 0.673255 |
| TAS2R10  | 0.21903  | 0.030509 | 1.572466 | 0.13107  |
| PRB2     | 0.172343 | 0.002825 | 10.5143  | 0.401877 |
| PYROXD1  | 0.750685 | 0.399177 | 1.411725 | 0.373509 |
| PSPC1    | 0.202487 | 0.048609 | 0.843482 | 0.028251 |
| ZNF549   | 1.171597 | 0.443996 | 3.091556 | 0.749049 |
| A1BG     | 0.002346 | 8.77E-05 | 0.062773 | 0.000305 |
| ZSCAN18  | 0.94328  | 0.616778 | 1.442623 | 0.78764  |
| ZNF211   | 0.564249 | 0.276971 | 1.149497 | 0.114977 |
| PDZRN3   | 4.518959 | 0.079828 | 255.8137 | 0.463911 |
| LHX4     | 0.037457 | 0.002654 | 0.528573 | 0.015013 |
| RNF2     | 0.383322 | 0.075867 | 1.93674  | 0.245973 |
| SEC22A   | 0.44181  | 0.176678 | 1.10481  | 0.080669 |
| CSTA     | 1.18     | 0.824322 | 1.689146 | 0.365804 |
| DPPA4    | 1.407768 | 0.997323 | 1.987132 | 0.051809 |
| POPDC2   | 0.533539 | 0.054264 | 5.24593  | 0.590094 |
| B4GALT4  | 0.661794 | 0.17565  | 2.493438 | 0.541896 |
| CD80     | 7.993582 | 0.980898 | 65.14171 | 0.052144 |
| KIF18A   | 0.172156 | 0.020219 | 1.465797 | 0.107393 |
| MAPK8IP1 | 0.414274 | 0.042522 | 4.036129 | 0.448036 |
| CRY2     | 2.532192 | 1.114156 | 5.755024 | 0.026553 |
| PEX16    | 3.914264 | 1.519763 | 10.08149 | 0.004698 |
| DEPDC7   | 0.62658  | 0.170813 | 2.298427 | 0.480833 |
| CAT      | 0.700434 | 0.433999 | 1.130437 | 0.144858 |
| PILRB    | 0.243469 | 0.083721 | 0.708033 | 0.00949  |
| ZMYM2    | 0.357428 | 0.114265 | 1.118061 | 0.077032 |
| GJB6     | 0.931993 | 0.48232  | 1.800899 | 0.834011 |
| TBC1D15  | 0.922125 | 0.493838 | 1.721852 | 0.799142 |
| HCRTR1   | 1.188501 | 0.119989 | 11.77223 | 0.882653 |
| ZCCHC17  | 0.608801 | 0.23265  | 1.593122 | 0.311958 |
| FABP3    | 0.256162 | 0.017977 | 3.650095 | 0.315009 |
| KHDRBS1  | 0.519601 | 0.237498 | 1.136787 | 0.101212 |
| TMEM39B  | 1.562816 | 0.69323  | 3.523209 | 0.281685 |
| CCRL2    | 2.793568 | 1.472316 | 5.300506 | 0.001668 |
| CCR2     | 2.023388 | 1.070719 | 3.823693 | 0.029977 |
| POLR3GL  | 0.731987 | 0.333015 | 1.608955 | 0.437499 |

|          |          |          |          |          |
|----------|----------|----------|----------|----------|
| TNFSF10  | 1.079563 | 0.827699 | 1.408066 | 0.572206 |
| ZNF639   | 0.670611 | 0.10132  | 4.438586 | 0.678597 |
| PIK3CA   | 0.214417 | 0.030853 | 1.490128 | 0.119536 |
| PDS5A    | 0.698622 | 0.405846 | 1.202604 | 0.195592 |
| TMEM156  | 0.639986 | 0.273886 | 1.495449 | 0.302705 |
| LIAS     | 0.6008   | 0.21383  | 1.688072 | 0.333738 |
| ZSCAN20  | 0.963568 | 0.070406 | 13.18735 | 0.97782  |
| CLCC1    | 0.259111 | 0.062459 | 1.074919 | 0.062823 |
| GPSM2    | 0.521238 | 0.323399 | 0.840104 | 0.007464 |
| GTDC1    | 0.089005 | 0.007262 | 1.090807 | 0.058493 |
| CXCR4    | 1.174687 | 0.787525 | 1.752185 | 0.430015 |
| ZRANB3   | 0.085764 | 0.004167 | 1.765337 | 0.111461 |
| ACVR2A   | 6.236746 | 0.592459 | 65.65345 | 0.127483 |
| POLK     | 1.763182 | 0.240343 | 12.93491 | 0.577    |
| FLT3     | 0.991748 | 0.723856 | 1.358783 | 0.958864 |
| RPL21    | 0.797551 | 0.452992 | 1.40419  | 0.433167 |
| MTIF3    | 0.86045  | 0.39375  | 1.880315 | 0.706301 |
| GTF3A    | 0.619688 | 0.321981 | 1.192661 | 0.15199  |
| RASL11A  | 0.630368 | 0.136126 | 2.919097 | 0.555138 |
| UBL3     | 0.905187 | 0.473686 | 1.729762 | 0.763047 |
| FYTTD1   | 0.445715 | 0.1084   | 1.832666 | 0.262626 |
| XPNPEP2  | 1.0445   | 0.191884 | 5.685631 | 0.959834 |
| SASH3    | 1.433062 | 0.822587 | 2.496595 | 0.203939 |
| OCRL     | 0.90082  | 0.358794 | 2.261681 | 0.824015 |
| MRPS2    | 1.35669  | 0.628185 | 2.930042 | 0.437452 |
| FMOD     | 0.572845 | 0.042568 | 7.708815 | 0.674434 |
| LAX1     | 0.745295 | 0.464985 | 1.194587 | 0.221971 |
| KIAA1191 | 0.224735 | 0.062936 | 0.802494 | 0.021517 |
| COPA     | 0.566559 | 0.228997 | 1.401716 | 0.218954 |
| CD244    | 0.901483 | 0.54851  | 1.481601 | 0.682438 |
| LY9      | 0.455828 | 0.198679 | 1.045805 | 0.063702 |
| HS3ST2   | 0.006622 | 0.00024  | 0.182354 | 0.003017 |
| RBBP6    | 0.257733 | 0.047815 | 1.389237 | 0.114688 |
| ZC3H7A   | 0.472239 | 0.196279 | 1.136189 | 0.093948 |
| SERAC1   | 0.375848 | 0.060969 | 2.316945 | 0.291649 |
| ANXA11   | 1.164614 | 0.432487 | 3.136108 | 0.763022 |
| ZNF205   | 2.286622 | 0.605318 | 8.637847 | 0.222589 |
| RPL5     | 0.376479 | 0.179712 | 0.788688 | 0.009622 |
| ODF2L    | 0.145142 | 0.02939  | 0.716773 | 0.017854 |
| SPATA1   | 11.02094 | 0.494314 | 245.7166 | 0.129742 |
| LRRC39   | 0.691914 | 0.05107  | 9.374318 | 0.781808 |
| RWDD3    | 0.948414 | 0.376645 | 2.388157 | 0.910499 |
| ZNF644   | 1.280352 | 0.295104 | 5.554997 | 0.741359 |
| CCDC18   | 0.057841 | 0.009591 | 0.348805 | 0.001878 |
| RPAP2    | 0.733944 | 0.346087 | 1.556467 | 0.419968 |
| BBS9     | 0.376297 | 0.063684 | 2.22348  | 0.28088  |
| PMS2     | 0.145018 | 0.029213 | 0.719904 | 0.018178 |
| ZMIZ2    | 0.288713 | 0.076461 | 1.090169 | 0.066861 |
| OCM      | 7.923097 | 0.612584 | 102.4765 | 0.113025 |
| EEDP1    | 0.764197 | 0.27868  | 2.095586 | 0.601313 |
| KIAA0087 | 0.52229  | 0.055394 | 4.924447 | 0.570455 |
| KLHL7    | 0.675636 | 0.163188 | 2.797295 | 0.588568 |
| HERPUD2  | 1.514868 | 0.627486 | 3.657175 | 0.355694 |
| CBX3     | 2.830513 | 0.400014 | 20.02879 | 0.297325 |
| HNRNPA2  | 0.619132 | 0.415498 | 0.922568 | 0.018472 |
| WIPF3    | 3.533677 | 0.29132  | 42.86314 | 0.321504 |
| NPY      | 3.274735 | 0.443001 | 24.20739 | 0.245135 |
| FAM126A  | 1.187824 | 0.045297 | 31.1486  | 0.917747 |

|          |          |          |          |          |
|----------|----------|----------|----------|----------|
| HOXA7    | 1.449166 | 0.690879 | 3.039724 | 0.326313 |
| INHBA    | 4.602386 | 0.658704 | 32.157   | 0.123788 |
| FKBP9    | 0.429516 | 0.023669 | 7.7942   | 0.567689 |
| ARL4A    | 1.19164  | 0.7112   | 1.996632 | 0.505538 |
| POLM     | 2.224465 | 1.029213 | 4.807797 | 0.042034 |
| RAMP3    | 3.427611 | 0.616494 | 19.05698 | 0.159323 |
| TWIST1   | 1.00283  | 0.71825  | 1.400164 | 0.98676  |
| SMU1     | 0.385096 | 0.130539 | 1.136054 | 0.083834 |
| GLIPR2   | 1.58557  | 1.070927 | 2.347529 | 0.021323 |
| CLTA     | 6.056466 | 1.689056 | 21.71673 | 0.005701 |
| RECK     | 1.804204 | 0.913684 | 3.562667 | 0.089145 |
| SPINK4   | 0.556123 | 0.144865 | 2.134899 | 0.392589 |
| ACO1     | 1.062697 | 0.54492  | 2.072457 | 0.858377 |
| DCAF10   | 0.384569 | 0.122608 | 1.20623  | 0.10132  |
| KIAA1549 | 6.44017  | 0.989373 | 41.92129 | 0.051321 |
| TRIM24   | 0.324141 | 0.128686 | 0.816462 | 0.01684  |
| CALD1    | 2.328408 | 0.269788 | 20.09536 | 0.442141 |
| NUDT10   | 2.321732 | 0.720448 | 7.482065 | 0.158305 |
| NEUROG3  | 13.70964 | 2.808628 | 66.92028 | 0.001209 |
| PLAU     | 1.511047 | 1.015549 | 2.248306 | 0.041744 |
| SRGN     | 0.971588 | 0.590557 | 1.598462 | 0.909657 |
| BICC1    | 1.958343 | 0.146137 | 26.24327 | 0.611758 |
| CISD1    | 1.11385  | 0.574602 | 2.159165 | 0.749518 |
| EGR2     | 1.390866 | 1.065391 | 1.815772 | 0.01528  |
| ECD      | 0.636879 | 0.208058 | 1.949529 | 0.429285 |
| P4HA1    | 0.692247 | 0.273783 | 1.750313 | 0.437065 |
| SLC25A16 | 0.43425  | 0.05481  | 3.440486 | 0.429592 |
| ZWINT    | 0.296648 | 0.08961  | 0.982036 | 0.04663  |
| VPS26A   | 1.059852 | 0.544416 | 2.063286 | 0.864205 |
| RBM19    | 30.54624 | 0.509278 | 1832.148 | 0.101645 |
| CIT      | 0.899368 | 0.194954 | 4.148991 | 0.891849 |
| IFT81    | 0.178014 | 0.010598 | 2.990121 | 0.230519 |
| ACADS    | 1.587518 | 0.871348 | 2.892315 | 0.131038 |
| HVCN1    | 1.432735 | 0.983073 | 2.088074 | 0.061327 |
| NME2P1   | 6.209296 | 0.276367 | 139.5078 | 0.25013  |
| DDX54    | 0.542215 | 0.241053 | 1.219639 | 0.138899 |
| MED13L   | 1.303361 | 0.65761  | 2.583216 | 0.447799 |
| CDKN2C   | 1.176355 | 0.52571  | 2.632275 | 0.692664 |
| RNF11    | 0.92631  | 0.301229 | 2.848495 | 0.893754 |
| RASSF8   | 0.018416 | 0.00138  | 0.245781 | 0.002516 |
| ITPR2    | 0.573648 | 0.311346 | 1.056935 | 0.074689 |
| CCDC91   | 0.709002 | 0.350374 | 1.434707 | 0.338942 |
| NECAB1   | 2.746362 | 0.523142 | 14.41772 | 0.232421 |
| WWP1     | 0.704526 | 0.185367 | 2.677697 | 0.607173 |
| ACOT9    | 0.943653 | 0.418613 | 2.127217 | 0.888779 |
| PRDX4    | 0.75726  | 0.416311 | 1.377439 | 0.36235  |
| PKN1     | 2.740659 | 0.885829 | 8.479297 | 0.08019  |
| GIPC1    | 2.872299 | 1.478863 | 5.578679 | 0.001838 |
| EBPL     | 0.735943 | 0.473609 | 1.143585 | 0.172768 |
| ATP7B    | 0.916464 | 0.427961 | 1.962579 | 0.82235  |
| ZC3H13   | 0.090386 | 0.013498 | 0.605239 | 0.01323  |
| GUCY1B2  | 0.443459 | 0.087004 | 2.260307 | 0.327794 |
| NLN      | 0.495482 | 0.118838 | 2.065858 | 0.335058 |
| CENPK    | 0.460566 | 0.241624 | 0.877897 | 0.018491 |
| OPTN     | 1.148468 | 0.768819 | 1.71559  | 0.499014 |
| ATF1     | 0.996755 | 0.457977 | 2.169367 | 0.993465 |
| TSFM     | 1.16565  | 0.304853 | 4.457037 | 0.822762 |
| ARHGAP9  | 0.785212 | 0.428298 | 1.439552 | 0.434286 |

|          |          |          |          |          |
|----------|----------|----------|----------|----------|
| NCKAP1L  | 0.51847  | 0.266848 | 1.007357 | 0.052582 |
| MMP19    | 10.03198 | 0.871037 | 115.5413 | 0.064424 |
| PFDN5    | 3.057697 | 1.076674 | 8.683694 | 0.035845 |
| SPATS2   | 1.692972 | 0.764161 | 3.750719 | 0.194554 |
| ORMDL2   | 2.668963 | 0.853726 | 8.343856 | 0.091405 |
| NR4A1    | 1.525737 | 0.404424 | 5.756018 | 0.532868 |
| PDE1B    | 1.58551  | 0.541055 | 4.646185 | 0.400783 |
| CDK2     | 0.30635  | 0.127763 | 0.734569 | 0.008019 |
| LRP1     | 1.416865 | 0.96364  | 2.083253 | 0.076453 |
| NFE2     | 0.845692 | 0.49651  | 1.440444 | 0.537351 |
| IKZF4    | 1.463769 | 0.40287  | 5.318393 | 0.562707 |
| SMUG1    | 0.936283 | 0.362458 | 2.418562 | 0.891843 |
| TUBA1B   | 0.281815 | 0.096201 | 0.825559 | 0.020914 |
| KBTBD4   | 0.521496 | 0.09211  | 2.952526 | 0.461721 |
| SARDH    | 6.690544 | 1.178145 | 37.9948  | 0.031955 |
| DBH      | 0.925443 | 0.071684 | 11.94749 | 0.952659 |
| ATPAF1   | 0.350354 | 0.122938 | 0.998458 | 0.049663 |
| STIL     | 0.539895 | 0.26286  | 1.108904 | 0.093255 |
| HJURP    | 0.738498 | 0.440322 | 1.238593 | 0.250577 |
| COL10A1  | 0.826328 | 0.085847 | 7.953939 | 0.868854 |
| AMD1     | 0.371019 | 0.199828 | 0.688868 | 0.001687 |
| USP45    | 0.102986 | 0.01561  | 0.679464 | 0.018205 |
| MORF4L2  | 0.922195 | 0.547829 | 1.55239  | 0.760496 |
| RAB9B    | 0.976846 | 0.325508 | 2.931508 | 0.966674 |
| RAB9A    | 0.968446 | 0.410045 | 2.287282 | 0.941711 |
| METTL8   | 0.302765 | 0.046583 | 1.967816 | 0.210888 |
| TTC21B   | 8.014517 | 0.202565 | 317.095  | 0.26739  |
| NMI      | 0.856188 | 0.441412 | 1.660711 | 0.645994 |
| TNFAIP6  | 0.914797 | 0.420201 | 1.991558 | 0.822482 |
| BAZ2B    | 0.765694 | 0.442415 | 1.325195 | 0.340123 |
| SLC36A1  | 1.096028 | 0.646313 | 1.858662 | 0.733658 |
| LPGAT1   | 0.387955 | 0.086793 | 1.734112 | 0.215199 |
| BATF3    | 1.337029 | 0.86247  | 2.072707 | 0.194114 |
| GOS2     | 1.13221  | 0.914654 | 1.401514 | 0.254058 |
| KCNJ2    | 1.95155  | 1.106902 | 3.440726 | 0.020832 |
| RAP2C    | 0.485372 | 0.242379 | 0.971972 | 0.04133  |
| EXOSC9   | 0.163407 | 0.075336 | 0.354436 | 4.53E-06 |
| PLA2G12A | 0.467908 | 0.096578 | 2.266955 | 0.345493 |
| B9D2     | 0.540227 | 0.248818 | 1.172925 | 0.119535 |
| PFKFB2   | 1.322621 | 0.176553 | 9.908205 | 0.785509 |
| RAB38    | 1.497376 | 1.018254 | 2.201941 | 0.040179 |
| MXD4     | 1.633781 | 0.928391 | 2.875124 | 0.088698 |
| CKS2     | 0.884524 | 0.567453 | 1.378762 | 0.587959 |
| ACSL3    | 1.963435 | 0.784708 | 4.912753 | 0.149344 |
| CHPF     | 2.47847  | 0.918346 | 6.689    | 0.073164 |
| DNPEP    | 1.554366 | 0.665959 | 3.62793  | 0.307768 |
| OBSL1    | 1.14179  | 0.05202  | 25.061   | 0.932945 |
| FAM124B  | 1.429313 | 0.924619 | 2.209491 | 0.107989 |
| SLC12A4  | 0.898966 | 0.349573 | 2.311792 | 0.82508  |
| GCNT7    | 11.06242 | 0.50574  | 241.9764 | 0.126789 |
| PI3      | 1.515843 | 1.111999 | 2.066352 | 0.008499 |
| SNX21    | 2.131736 | 0.372913 | 12.18595 | 0.394776 |
| SLPI     | 1.093218 | 0.856815 | 1.394847 | 0.473424 |
| TTPAL    | 0.738948 | 0.285311 | 1.913861 | 0.53324  |
| PREX1    | 2.892398 | 1.473402 | 5.677993 | 0.002028 |
| KCNS1    | 1.350204 | 0.33099  | 5.507867 | 0.675523 |
| SDC4     | 2.367714 | 1.139573 | 4.919446 | 0.02088  |
| NCOA3    | 1.452498 | 0.404572 | 5.214769 | 0.567063 |

|         |          |          |          |          |
|---------|----------|----------|----------|----------|
| PIGT    | 0.802703 | 0.349017 | 1.846135 | 0.60503  |
| MATN4   | 2.52559  | 0.404922 | 15.75266 | 0.321206 |
| NCOA5   | 1.557572 | 0.697615 | 3.477606 | 0.279565 |
| VAPB    | 3.302644 | 0.527285 | 20.68607 | 0.201861 |
| PARD6B  | 5.054265 | 0.497005 | 51.39906 | 0.170951 |
| CHD6    | 1.062786 | 0.334689 | 3.374823 | 0.91773  |
| PLCG1   | 1.363414 | 0.710622 | 2.615876 | 0.351118 |
| TOX2    | 0.973253 | 0.228258 | 4.149784 | 0.970771 |
| ARFGEF2 | 0.365297 | 0.138751 | 0.961737 | 0.041454 |
| ZNFX1   | 4.598271 | 2.111405 | 10.01423 | 0.000122 |
| ZNF831  | 0.965756 | 0.336261 | 2.773693 | 0.948388 |
| CSE1L   | 0.470209 | 0.213255 | 1.036771 | 0.061421 |
| RAB22A  | 0.648388 | 0.319556 | 1.315593 | 0.230073 |
| STAU1   | 1.602486 | 0.428369 | 5.994747 | 0.483594 |
| CDH26   | 0.475891 | 0.22617  | 1.001333 | 0.050412 |
| SNAI1   | 6.583928 | 1.725018 | 25.12907 | 0.005819 |
| MOCS3   | 1.412858 | 0.213505 | 9.349519 | 0.719997 |
| STX16   | 0.382552 | 0.170016 | 0.860777 | 0.020217 |
| PPP4R1L | 0.48768  | 0.023793 | 9.995678 | 0.641214 |
| PMEPA1  | 10.3059  | 1.454771 | 73.0091  | 0.019532 |
| RNF114  | 0.54337  | 0.213648 | 1.381951 | 0.20029  |
| DDX27   | 0.513542 | 0.219843 | 1.199609 | 0.123675 |
| BCAS4   | 1.834166 | 0.853103 | 3.943448 | 0.120383 |
| TP53TG5 | 3.703666 | 0.301327 | 45.5225  | 0.306376 |
| ZBP1    | 1.234587 | 0.686087 | 2.221591 | 0.482021 |
| NEURL2  | 1.151323 | 0.539567 | 2.456682 | 0.715557 |
| MTRR    | 0.236602 | 0.056009 | 0.999497 | 0.04992  |
| FASTKD3 | 0.846232 | 0.385522 | 1.857504 | 0.677241 |
| PEPD    | 3.365281 | 1.770804 | 6.395466 | 0.000212 |
| IQSEC2  | 2.593819 | 1.049489 | 6.410641 | 0.038961 |
| VAMP7   | 0.525168 | 0.256215 | 1.076443 | 0.078612 |
| IL9R    | 0.714589 | 0.163948 | 3.114631 | 0.654587 |
| XG      | 1.588753 | 0.167719 | 15.04978 | 0.686538 |
| STAMBP  | 0.262125 | 0.062702 | 1.09581  | 0.066565 |
| NAGK    | 1.61943  | 1.021855 | 2.566464 | 0.040171 |
| MCEE    | 0.572718 | 0.218397 | 1.501877 | 0.257167 |
| PAIP2B  | 0.685004 | 0.131814 | 3.559794 | 0.652754 |
| SNRNP27 | 0.554781 | 0.164851 | 1.867035 | 0.341309 |
| MPHOSP1 | 1.299597 | 0.368006 | 4.589476 | 0.683949 |
| IL17C   | 0.380435 | 0.032546 | 4.446913 | 0.441052 |
| ATP8A1  | 0.583418 | 0.154088 | 2.208977 | 0.427627 |
| USP22   | 0.530703 | 0.030095 | 9.35866  | 0.665245 |
| POF1B   | 0.091033 | 0.010176 | 0.814361 | 0.032061 |
| HIF3A   | 0.008066 | 2.03E-05 | 3.20416  | 0.114428 |
| ZNF576  | 1.619182 | 0.573583 | 4.570835 | 0.362734 |
| IRGC    | 1.041669 | 0.052338 | 20.73225 | 0.978657 |
| ZNF45   | 0.340759 | 0.147192 | 0.788875 | 0.011948 |
| LYPD3   | 1.40062  | 0.487228 | 4.026318 | 0.531734 |
| CEACAM8 | 1.005922 | 0.856451 | 1.181478 | 0.942653 |
| USP9X   | 0.990938 | 0.260967 | 3.762767 | 0.989331 |
| CRISP2  | 2.614985 | 1.089388 | 6.277053 | 0.031429 |
| F13A1   | 1.228904 | 1.015977 | 1.486455 | 0.033734 |
| TRERF1  | 0.905187 | 0.217316 | 3.770373 | 0.891159 |
| PACSIN1 | 1.650692 | 1.135495 | 2.399644 | 0.008648 |
| BTN2A2  | 0.122097 | 0.021239 | 0.701883 | 0.01844  |
| SIRT5   | 0.327791 | 0.077679 | 1.383214 | 0.128926 |
| MRS2    | 0.232979 | 0.092714 | 0.585448 | 0.001943 |
| WRNIP1  | 0.588519 | 0.29866  | 1.159695 | 0.125557 |



|          |          |          |          |          |
|----------|----------|----------|----------|----------|
| SNRPC    | 0.465935 | 0.137165 | 1.582739 | 0.220935 |
| SERPINB6 | 0.986903 | 0.702017 | 1.387399 | 0.939531 |
| XPO5     | 0.281762 | 0.12662  | 0.626994 | 0.00191  |
| ABCC10   | 0.836696 | 0.327955 | 2.134626 | 0.709066 |
| PEX6     | 1.859998 | 1.03533  | 3.341535 | 0.037883 |
| NQO2     | 0.660219 | 0.376691 | 1.157154 | 0.147018 |
| UNC5CL   | 1.554662 | 0.416452 | 5.803729 | 0.511463 |
| AARS2    | 0.341806 | 0.118514 | 0.9858   | 0.046986 |
| ZNF391   | 0.067751 | 0.003137 | 1.463197 | 0.085949 |
| RPS10    | 2.094458 | 0.197547 | 22.20613 | 0.539414 |
| MOCS1    | 10.52388 | 1.774833 | 62.40134 | 0.00955  |
| MED20    | 0.92786  | 0.471808 | 1.824734 | 0.828217 |
| OR2B6    | 1.216877 | 0.161284 | 9.181251 | 0.849018 |
| TBCC     | 1.688722 | 1.011153 | 2.820325 | 0.045247 |
| SPDEF    | 4.653084 | 0.311416 | 69.52492 | 0.265109 |
| TCP11    | 3.222848 | 0.712878 | 14.57017 | 0.128438 |
| MAD2L1Bf | 2.397693 | 0.547218 | 10.50574 | 0.245993 |
| APOBEC2  | 0.819192 | 0.218832 | 3.066621 | 0.767135 |
| KLHDC3   | 0.574164 | 0.26081  | 1.264002 | 0.168182 |
| GNMT     | 0.189335 | 0.048006 | 0.746736 | 0.017449 |
| DNAH8    | 1.370922 | 0.120247 | 15.62975 | 0.799439 |
| TREM1    | 1.122867 | 0.821273 | 1.535215 | 0.467743 |
| MEA1     | 1.184218 | 0.401391 | 3.493779 | 0.75937  |
| CDKN1A   | 1.378698 | 1.014126 | 1.874333 | 0.040415 |
| SOX4     | 0.925548 | 0.701405 | 1.221319 | 0.584484 |
| GLO1     | 0.701392 | 0.360422 | 1.364929 | 0.296422 |
| CPNE5    | 1.67838  | 0.483754 | 5.82313  | 0.414585 |
| KCNK17   | 1.01037  | 0.731244 | 1.396043 | 0.950134 |
| RREB1    | 0.540939 | 0.104839 | 2.791098 | 0.46299  |
| SSR1     | 0.437297 | 0.215993 | 0.885348 | 0.021543 |
| RIOK1    | 0.077036 | 0.013341 | 0.444843 | 0.004165 |
| NRN1     | 0.120656 | 0.016704 | 0.871505 | 0.036056 |
| SLC35B3  | 0.802272 | 0.34476  | 1.86692  | 0.60918  |
| RPP40    | 0.860752 | 0.525101 | 1.410956 | 0.552066 |
| ATXN1    | 0.52566  | 0.223808 | 1.234622 | 0.139897 |
| NUP153   | 0.980189 | 0.521678 | 1.841689 | 0.950416 |
| DEK      | 0.720609 | 0.423596 | 1.225881 | 0.226782 |
| EEF1E1   | 0.22069  | 0.062584 | 0.778219 | 0.018777 |
| RUNX2    | 0.718249 | 0.189884 | 2.716823 | 0.625874 |
| LRRFIP1  | 1.224672 | 0.793877 | 1.889239 | 0.35949  |
| RAB17    | 0.262688 | 0.044728 | 1.542773 | 0.138887 |
| CXCL6    | 1.330372 | 0.219027 | 8.080704 | 0.756459 |
| EREG     | 0.799412 | 0.512004 | 1.248152 | 0.324696 |
| AHNAK    | 1.735312 | 1.076409 | 2.797548 | 0.023688 |
| WNT1     | 0.370176 | 0.047476 | 2.886297 | 0.342929 |
| SH3TC1   | 1.565652 | 1.168216 | 2.098301 | 0.002694 |
| CNOT1    | 0.307333 | 0.05552  | 1.701267 | 0.176586 |
| LRRC29   | 0.334408 | 0.04558  | 2.453479 | 0.281351 |
| BBS2     | 0.488277 | 0.214014 | 1.114014 | 0.088491 |
| MT1G     | 1.237043 | 0.994936 | 1.538063 | 0.055584 |
| MT2A     | 1.354482 | 1.016753 | 1.804393 | 0.038126 |
| GOT2     | 0.693205 | 0.286621 | 1.676544 | 0.416103 |
| DOK4     | 1.84337  | 0.958118 | 3.54655  | 0.066978 |
| GPR18    | 1.276689 | 0.73546  | 2.216212 | 0.385361 |
| CLYBL    | 0.332672 | 0.106693 | 1.037284 | 0.057844 |
| TMTC4    | 0.24725  | 0.078468 | 0.77908  | 0.01702  |
| RAP2A    | 0.927245 | 0.524425 | 1.639478 | 0.795036 |
| SLC10A2  | 0.655265 | 0.145677 | 2.94742  | 0.581634 |

|          |          |          |          |          |
|----------|----------|----------|----------|----------|
| ABCC4    | 0.588624 | 0.338589 | 1.023298 | 0.060335 |
| EFNB2    | 0.582673 | 0.187413 | 1.811552 | 0.350675 |
| TM9SF2   | 1.316139 | 0.607003 | 2.853732 | 0.486626 |
| IRF1     | 0.910149 | 0.597718 | 1.385891 | 0.660784 |
| UPF3B    | 0.374338 | 0.177846 | 0.787923 | 0.009663 |
| RNF113A  | 0.701143 | 0.264243 | 1.860415 | 0.475785 |
| NDUFA1   | 1.010872 | 0.530074 | 1.927774 | 0.97381  |
| BMP4     | 0.646429 | 0.031471 | 13.27778 | 0.777232 |
| PTGER2   | 0.825199 | 0.597745 | 1.139204 | 0.242888 |
| FAM193A  | 1.576153 | 0.535715 | 4.637276 | 0.4086   |
| GRK4     | 0.097443 | 0.011046 | 0.859603 | 0.036069 |
| HS3ST3B1 | 2.613863 | 0.336047 | 20.3313  | 0.358602 |
| SLC25A35 | 0.589985 | 0.211178 | 1.64829  | 0.314121 |
| MRPS7    | 1.334276 | 0.502445 | 3.543257 | 0.562764 |
| GGA3     | 1.224079 | 0.346395 | 4.325607 | 0.753581 |
| ARMC7    | 1.643655 | 0.908114 | 2.974958 | 0.100681 |
| NUP85    | 0.690769 | 0.288894 | 1.65168  | 0.405539 |
| SLC25A19 | 0.766264 | 0.403191 | 1.456282 | 0.416433 |
| MIF4GD   | 0.743741 | 0.336364 | 1.644499 | 0.464606 |
| NT5C     | 0.699688 | 0.346813 | 1.411607 | 0.318627 |
| MSTO1    | 0.448081 | 0.169352 | 1.185561 | 0.105859 |
| TTF1     | 0.556936 | 0.094181 | 3.293412 | 0.518612 |
| GTF3C4   | 0.238773 | 0.023546 | 2.421338 | 0.2256   |
| DDX31    | 0.961468 | 0.155714 | 5.936644 | 0.966255 |
| PPP1R12C | 2.778653 | 1.268312 | 6.08755  | 0.010651 |
| MBOAT7   | 1.523272 | 0.927771 | 2.501004 | 0.09619  |
| SRMS     | 0.103452 | 0.004154 | 2.576269 | 0.166652 |
| OPRL1    | 5.893571 | 1.692599 | 20.52121 | 0.005324 |
| SLC2A4RG | 0.248265 | 0.092336 | 0.667517 | 0.005764 |
| PPDPF    | 1.96235  | 1.237614 | 3.111483 | 0.004151 |
| IL1B     | 1.070528 | 0.808961 | 1.416671 | 0.633512 |
| CHCHD5   | 1.916878 | 0.959842 | 3.828151 | 0.065209 |
| PAX8     | 1.23163  | 0.248215 | 6.111286 | 0.798782 |
| INSIG2   | 0.783356 | 0.366225 | 1.675598 | 0.529084 |
| POLR1B   | 0.846409 | 0.201691 | 3.552014 | 0.819746 |
| CCDC93   | 0.452151 | 0.224296 | 0.911476 | 0.02648  |
| PSD4     | 1.270877 | 0.626787 | 2.576836 | 0.50627  |
| SLC25A23 | 1.635332 | 1.155364 | 2.314692 | 0.005526 |
| PSPN     | 4.256713 | 0.653193 | 27.74003 | 0.129865 |
| GTF2F1   | 1.747272 | 0.769498 | 3.967473 | 0.182287 |
| ALKBH7   | 1.444084 | 0.855348 | 2.438046 | 0.16906  |
| CLPP     | 1.512933 | 0.75971  | 3.012948 | 0.238776 |
| TNFSF9   | 1.403981 | 0.876528 | 2.24883  | 0.158045 |
| THOC2    | 1.202864 | 0.340448 | 4.249932 | 0.774255 |
| MED1     | 1.008299 | 0.228987 | 4.439845 | 0.991281 |
| RPL23    | 1.142009 | 0.393142 | 3.317338 | 0.807183 |
| ATG4C    | 0.248322 | 0.068816 | 0.896068 | 0.033373 |
| CD70     | 1.202119 | 0.878352 | 1.64523  | 0.250224 |
| C3       | 0.932077 | 0.021576 | 40.26616 | 0.970797 |
| SH2D3A   | 0.640154 | 0.120225 | 3.408574 | 0.60114  |
| TRIP10   | 2.146632 | 0.949524 | 4.852988 | 0.06643  |
| GPR108   | 2.670458 | 1.429896 | 4.987318 | 0.002056 |
| TNFSF14  | 0.798306 | 0.187547 | 3.398035 | 0.76051  |
| FOSB     | 0.979879 | 0.771626 | 1.244337 | 0.867579 |
| OPA3     | 1.413909 | 0.330431 | 6.050087 | 0.640517 |
| SNRPD2   | 0.087864 | 0.012439 | 0.620658 | 0.014763 |
| RTN2     | 2.269484 | 0.873965 | 5.893322 | 0.092322 |
| EML2     | 0.779605 | 0.218699 | 2.779084 | 0.701054 |

|         |          |          |          |          |
|---------|----------|----------|----------|----------|
| VASP    | 0.790749 | 0.330643 | 1.891118 | 0.597687 |
| SYMPK   | 1.39186  | 0.611414 | 3.168515 | 0.430826 |
| SDCBP2  | 4.195503 | 0.060095 | 292.905  | 0.507991 |
| PANK2   | 1.141337 | 0.333254 | 3.90888  | 0.833296 |
| GNRH2   | 0.241976 | 0.003782 | 15.48099 | 0.503654 |
| CD93    | 1.085653 | 0.892481 | 1.320637 | 0.411027 |
| GZF1    | 0.682456 | 0.281958 | 1.651829 | 0.396919 |
| NAPB    | 0.472109 | 0.257465 | 0.865697 | 0.01526  |
| CENPB   | 1.707083 | 0.78805  | 3.697902 | 0.175099 |
| PSMF1   | 0.135863 | 0.014768 | 1.249911 | 0.077909 |
| DTD1    | 2.082368 | 0.997099 | 4.348875 | 0.050911 |
| RBCK1   | 0.860928 | 0.374129 | 1.981123 | 0.724717 |
| TMX4    | 0.410704 | 0.19391  | 0.869879 | 0.020124 |
| STK35   | 2.419393 | 0.974646 | 6.005732 | 0.056832 |
| SNRPB   | 0.480989 | 0.193352 | 1.196524 | 0.115466 |
| NRSN2   | 1.103718 | 0.434831 | 2.801531 | 0.835506 |
| RRBP1   | 1.476519 | 0.761505 | 2.862897 | 0.248713 |
| BMP2    | 1.062926 | 0.488203 | 2.314227 | 0.877824 |
| ZNF133  | 1.24583  | 0.401819 | 3.862662 | 0.703412 |
| MKKS    | 0.46761  | 0.098083 | 2.229329 | 0.340138 |
| BFSP1   | 4.979147 | 0.300254 | 82.56968 | 0.262583 |
| DSTN    | 0.989977 | 0.557607 | 1.757609 | 0.972562 |
| SNRPB2  | 0.485485 | 0.197056 | 1.196086 | 0.116241 |
| TBC1D20 | 2.35392  | 0.569733 | 9.725499 | 0.23692  |
| ITPA    | 0.988239 | 0.382802 | 2.551231 | 0.980494 |
| MCM8    | 0.131315 | 0.02658  | 0.648736 | 0.012742 |
| FAM110A | 1.533585 | 0.807374 | 2.913002 | 0.191448 |
| SIRPD   | 1.561031 | 0.603282 | 4.039273 | 0.358561 |
| MRPS26  | 0.365702 | 0.176332 | 0.758444 | 0.006875 |
| S1PR4   | 1.735676 | 1.197597 | 2.515512 | 0.003587 |
| NCLN    | 0.650306 | 0.32394  | 1.305484 | 0.226188 |
| HNRNPR  | 0.400112 | 0.13953  | 1.147355 | 0.088339 |
| ZNF436  | 0.259377 | 0.027825 | 2.417887 | 0.236095 |
| MAX     | 0.413024 | 0.139117 | 1.226231 | 0.111242 |
| ARMCX5  | 1.024952 | 0.376985 | 2.786652 | 0.96148  |
| MMP24   | 1.660422 | 0.186571 | 14.77726 | 0.649371 |
| NECAB3  | 4.11445  | 1.331754 | 12.71158 | 0.01398  |
| ID1     | 1.418923 | 0.960551 | 2.09603  | 0.078787 |
| RALY    | 1.646449 | 0.779677 | 3.476817 | 0.191076 |
| DYNLRB1 | 0.740014 | 0.262847 | 2.083419 | 0.568603 |
| EIF2S2  | 0.497398 | 0.212762 | 1.162824 | 0.107005 |
| ERGIC3  | 1.919296 | 0.871593 | 4.226393 | 0.105504 |
| ROMO1   | 0.78255  | 0.290234 | 2.109968 | 0.628019 |
| CEP250  | 0.454332 | 0.049346 | 4.18303  | 0.486097 |
| PLAGL2  | 0.942839 | 0.494492 | 1.797693 | 0.858128 |
| AMOT    | 2.863967 | 1.153728 | 7.109392 | 0.023316 |
| TMEM115 | 2.246859 | 0.990657 | 5.095989 | 0.052685 |
| PSMB2   | 0.581582 | 0.247293 | 1.36776  | 0.214161 |
| UROD    | 0.778759 | 0.476571 | 1.272562 | 0.318287 |
| ST3GAL3 | 0.266606 | 0.084388 | 0.842282 | 0.024297 |
| TMEM53  | 0.918683 | 0.30635  | 2.754952 | 0.879687 |
| HECTD3  | 1.878751 | 0.821067 | 4.298927 | 0.135398 |
| KLC1    | 1.099308 | 0.287998 | 4.196128 | 0.889814 |
| XRCC3   | 0.735701 | 0.331897 | 1.630794 | 0.449801 |
| TUBGCP3 | 0.80687  | 0.154119 | 4.224254 | 0.799443 |
| MCF2L   | 1.227707 | 0.065171 | 23.12798 | 0.891067 |
| PCID2   | 0.251024 | 0.093276 | 0.675556 | 0.00621  |
| PROZ    | 2.045174 | 0.149639 | 27.95214 | 0.59178  |

|         |          |          |          |          |
|---------|----------|----------|----------|----------|
| LRFN3   | 1.133698 | 0.748587 | 1.716927 | 0.553472 |
| CAPNS1  | 2.259403 | 1.196952 | 4.264918 | 0.011918 |
| PDCD2L  | 0.85928  | 0.376243 | 1.962459 | 0.718902 |
| RBM42   | 1.889317 | 0.955243 | 3.736763 | 0.067493 |
| KIRREL2 | 0.025977 | 0.000363 | 1.860242 | 0.093907 |
| UBA2    | 0.256861 | 0.095721 | 0.689275 | 0.006958 |
| FFAR2   | 1.179044 | 0.892319 | 1.557901 | 0.246638 |
| HCST    | 0.993335 | 0.605697 | 1.629056 | 0.978863 |
| FFAR1   | 0.17606  | 0.018109 | 1.711673 | 0.134446 |
| COX6B1  | 1.107734 | 0.454716 | 2.69855  | 0.821807 |
| THRA    | 0.901284 | 0.207772 | 3.909638 | 0.889588 |
| CCR7    | 1.056323 | 0.752179 | 1.483447 | 0.751806 |
| NR1D1   | 2.379293 | 0.34994  | 16.17714 | 0.375443 |
| FRMD8   | 1.921054 | 0.780896 | 4.725916 | 0.155173 |
| PRDX5   | 2.551846 | 1.115435 | 5.838004 | 0.026508 |
| BCL2L12 | 0.704148 | 0.272437 | 1.819963 | 0.469071 |
| IRF3    | 1.586549 | 0.676732 | 3.719547 | 0.288355 |
| PRMT1   | 0.86175  | 0.397282 | 1.869237 | 0.706458 |
| RRAS    | 1.37087  | 1.082365 | 1.736276 | 0.008885 |
| PRRG2   | 1.237048 | 0.480767 | 3.183014 | 0.659099 |
| SCAF1   | 4.553537 | 1.488273 | 13.93205 | 0.007888 |
| PRR12   | 4.549324 | 0.96261  | 21.50024 | 0.055892 |
| TSKS    | 1.058261 | 0.527193 | 2.124301 | 0.87345  |
| FLRT1   | 3.266977 | 0.343141 | 31.10427 | 0.303167 |
| ASL     | 0.576092 | 0.104559 | 3.174122 | 0.526477 |
| SBDS    | 0.668855 | 0.392601 | 1.139496 | 0.138989 |
| CSN1S1  | 0.73994  | 0.374241 | 1.462993 | 0.386501 |
| STAT5A  | 1.158606 | 0.734469 | 1.827671 | 0.526728 |
| WNK4    | 1.120272 | 0.094359 | 13.30032 | 0.928314 |
| BECN1   | 0.756613 | 0.356419 | 1.606153 | 0.467719 |
| PRKCG   | 0.257993 | 0.023185 | 2.870792 | 0.27042  |
| TRAP1   | 1.275432 | 0.677704 | 2.400349 | 0.450799 |
| GLIS2   | 2.467715 | 0.301998 | 20.16442 | 0.399337 |
| DNAJC8  | 0.544605 | 0.224833 | 1.319175 | 0.178211 |
| AHDC1   | 1.901725 | 1.092462 | 3.310468 | 0.023048 |
| IFI6    | 1.098486 | 0.696485 | 1.732517 | 0.686171 |
| ZNF384  | 1.085631 | 0.268817 | 4.384374 | 0.908157 |
| EMG1    | 1.378597 | 0.664371 | 2.860646 | 0.388661 |
| UXT     | 1.016363 | 0.258083 | 4.002568 | 0.981484 |
| CFP     | 1.584872 | 1.168969 | 2.148747 | 0.003024 |
| ELK1    | 1.136639 | 0.429947 | 3.004901 | 0.796245 |
| TIMM17B | 0.668603 | 0.310078 | 1.441668 | 0.304481 |
| KTN1    | 0.537915 | 0.250044 | 1.157205 | 0.112647 |
| RHOJ    | 1.973299 | 0.0876   | 44.45121 | 0.668858 |
| DLGAP5  | 0.886576 | 0.616819 | 1.274307 | 0.515437 |
| HSPA2   | 5.436932 | 0.935758 | 31.58962 | 0.059294 |
| ZBTB1   | 2.330359 | 0.294489 | 18.44067 | 0.422775 |
| TRMT5   | 0.241986 | 0.069555 | 0.841884 | 0.025712 |
| SGPP1   | 1.197459 | 0.273645 | 5.240042 | 0.810898 |
| PLEKHG3 | 1.277785 | 0.897188 | 1.819837 | 0.174259 |
| PZP     | 1.124995 | 0.116911 | 10.8254  | 0.918791 |
| RHOT1   | 0.404688 | 0.133386 | 1.227809 | 0.110146 |
| EVI2A   | 1.784545 | 1.145814 | 2.779336 | 0.010404 |
| OMG     | 4.362153 | 0.362951 | 52.42682 | 0.245611 |
| AIF1L   | 1.434676 | 1.140524 | 1.804693 | 0.002048 |
| FAM78A  | 2.034425 | 0.803842 | 5.148883 | 0.133854 |
| NUP214  | 2.452178 | 1.365492 | 4.40367  | 0.002675 |
| CTAG2   | 0.748673 | 0.146239 | 3.832829 | 0.728294 |

|         |          |          |          |          |
|---------|----------|----------|----------|----------|
| AVPR2   | 0.782014 | 0.151675 | 4.031947 | 0.768887 |
| SLC10A3 | 0.483148 | 0.200746 | 1.162821 | 0.104519 |
| MAP2K2  | 2.056328 | 1.076201 | 3.929086 | 0.02909  |
| HNRNPH2 | 0.67907  | 0.312624 | 1.47505  | 0.328132 |
| ARMCX1  | 1.728761 | 1.047303 | 2.853628 | 0.032298 |
| TIMM8A  | 0.390327 | 0.154139 | 0.988429 | 0.047198 |
| ZC4H2   | 0.969661 | 0.200123 | 4.698317 | 0.969475 |
| CANX    | 0.523611 | 0.282415 | 0.970801 | 0.039972 |
| IPPK    | 2.600139 | 0.584877 | 11.55922 | 0.209354 |
| ZNF484  | 0.859262 | 0.289939 | 2.54651  | 0.784357 |
| OMD     | 0.719475 | 0.050888 | 10.17228 | 0.807537 |
| FGD3    | 1.263403 | 0.669833 | 2.382962 | 0.470177 |
| HIVEP3  | 7.1576   | 1.739417 | 29.45312 | 0.006393 |
| PPCS    | 1.299497 | 0.589185 | 2.866154 | 0.516247 |
| BCL11B  | 0.80551  | 0.427244 | 1.518681 | 0.503825 |
| COX7C   | 0.914296 | 0.460456 | 1.815456 | 0.797935 |
| TRAF2   | 1.075632 | 0.321781 | 3.595563 | 0.905741 |
| ABHD8   | 1.611464 | 0.81887  | 3.171218 | 0.16715  |
| ATP13A4 | 1.233129 | 0.113108 | 13.44386 | 0.863498 |
| HELB    | 0.321573 | 0.087826 | 1.17743  | 0.086656 |
| RAP1B   | 1.604727 | 0.839045 | 3.069142 | 0.152851 |
| BEST3   | 0.707771 | 0.05163  | 9.702589 | 0.795823 |
| RAB3IP  | 0.256623 | 0.103282 | 0.63763  | 0.0034   |
| PTPRB   | 0.860921 | 0.057482 | 12.89417 | 0.913643 |
| DYRK2   | 0.566505 | 0.170027 | 1.887506 | 0.354738 |
| YEATS4  | 0.884935 | 0.491047 | 1.594777 | 0.684164 |
| TAS2R3  | 5.968322 | 0.564602 | 63.09028 | 0.137585 |
| TAS2R4  | 1.008093 | 0.068511 | 14.83337 | 0.995312 |
| TAS2R5  | 0.119223 | 0.014748 | 0.963822 | 0.046095 |
| LRRRC61 | 1.178337 | 0.531298 | 2.613367 | 0.686363 |
| IDUA    | 1.200709 | 0.712124 | 2.024511 | 0.492562 |
| FGFRL1  | 1.471845 | 0.881798 | 2.456716 | 0.139217 |
| TMEM175 | 1.068196 | 0.609259 | 1.872836 | 0.817871 |
| PIN1    | 0.653155 | 0.25211  | 1.692166 | 0.380505 |
| FBXL12  | 0.777342 | 0.284439 | 2.124397 | 0.623404 |
| UBR4    | 0.895679 | 0.498196 | 1.610294 | 0.712785 |
| HP1BP3  | 0.29436  | 0.089947 | 0.963324 | 0.043204 |
| SIN3B   | 5.408398 | 2.296963 | 12.73454 | 0.000112 |
| SLC35E1 | 2.119348 | 0.72878  | 6.163226 | 0.167873 |
| EPS15L1 | 0.390075 | 0.133106 | 1.143135 | 0.086143 |
| KLF2    | 1.557276 | 1.083989 | 2.237206 | 0.016563 |
| F2RL3   | 2.623211 | 0.160086 | 42.98457 | 0.499088 |
| GFER    | 0.168371 | 0.020755 | 1.365893 | 0.09531  |
| SYNGR3  | 0.474897 | 0.035289 | 6.390807 | 0.57449  |
| PKMYT1  | 0.918256 | 0.496519 | 1.698211 | 0.785743 |
| WFIKKN1 | 1.042864 | 0.172628 | 6.300055 | 0.96352  |
| WDR24   | 1.333486 | 0.569736 | 3.12107  | 0.507128 |
| FBXL16  | 0.969162 | 0.205636 | 4.567654 | 0.968412 |
| CHTF18  | 0.47903  | 0.209882 | 1.093327 | 0.080456 |
| GNG13   | 1.710641 | 0.135911 | 21.53093 | 0.677794 |
| MACF1   | 0.354499 | 0.126885 | 0.99042  | 0.047892 |
| SMARCA4 | 0.612043 | 0.294728 | 1.27099  | 0.187906 |
| TICAM1  | 2.526919 | 1.190775 | 5.362321 | 0.015744 |
| IL17B   | 0.016633 | 0.000635 | 0.435682 | 0.013947 |
| TUBA4A  | 1.089707 | 0.861189 | 1.378862 | 0.474339 |
| VIL1    | 1.271491 | 0.096371 | 16.77568 | 0.855202 |
| AAMP    | 1.855169 | 0.751085 | 4.582238 | 0.180401 |
| PNKD    | 2.153731 | 0.836275 | 5.546691 | 0.111943 |

|          |          |          |          |          |
|----------|----------|----------|----------|----------|
| TNFRSF19 | 0.130549 | 0.022681 | 0.751426 | 0.022608 |
| RNF6     | 0.012173 | 0.000436 | 0.339999 | 0.00946  |
| ECHS1    | 0.395757 | 0.200484 | 0.781224 | 0.007551 |
| AKAP9    | 0.07848  | 0.006594 | 0.934108 | 0.04402  |
| GNG11    | 1.184401 | 1.016194 | 1.380449 | 0.030348 |
| HIP1     | 1.641134 | 1.058089 | 2.545458 | 0.02696  |
| PTPN12   | 1.244688 | 0.729585 | 2.123466 | 0.421896 |
| POR      | 2.853115 | 1.592728 | 5.110895 | 0.000424 |
| FGL2     | 1.163734 | 0.961356 | 1.408714 | 0.119792 |
| STYXL1   | 1.215087 | 0.651479 | 2.266282 | 0.540159 |
| STEAP4   | 3.611543 | 0.774268 | 16.8459  | 0.102185 |
| GNAI1    | 1.710495 | 0.653075 | 4.480029 | 0.274538 |
| PEX1     | 0.275466 | 0.101379 | 0.748488 | 0.011472 |
| CASD1    | 0.643418 | 0.250824 | 1.650506 | 0.358913 |
| ZNF780B  | 5.792064 | 0.289927 | 115.712  | 0.250303 |
| LRFN1    | 2.96334  | 1.002362 | 8.760688 | 0.049503 |
| ZFP36    | 1.290851 | 0.955716 | 1.743505 | 0.095987 |
| SRD5A3   | 1.405483 | 0.408832 | 4.831774 | 0.589016 |
| SPINK2   | 1.127771 | 0.952579 | 1.335183 | 0.162728 |
| PAICS    | 0.382073 | 0.1805   | 0.80875  | 0.011911 |
| KDR      | 0.249354 | 0.037137 | 1.674272 | 0.152858 |
| PPAT     | 0.598566 | 0.3046   | 1.176234 | 0.136481 |
| TUBGCP6  | 1.090911 | 0.352725 | 3.373975 | 0.87994  |
| ADM2     | 0.964583 | 0.284254 | 3.273204 | 0.953873 |
| DGCR6L   | 1.351142 | 0.74801  | 2.440589 | 0.318488 |
| DGCR8    | 1.265373 | 0.436726 | 3.666299 | 0.664552 |
| ASPHD2   | 1.808853 | 1.096144 | 2.984964 | 0.020386 |
| VPREB3   | 1.138818 | 0.725252 | 1.788213 | 0.572323 |
| SDF2L1   | 0.979006 | 0.617259 | 1.552757 | 0.928161 |
| YWHAH    | 0.450466 | 0.185233 | 1.095483 | 0.078606 |
| RFPL2    | 2.018197 | 0.392253 | 10.38391 | 0.400795 |
| GNAZ     | 0.528198 | 0.105823 | 2.636417 | 0.436489 |
| MGAT3    | 0.415344 | 0.200781 | 0.8592   | 0.017829 |
| ADORA2A  | 1.421689 | 0.954039 | 2.118571 | 0.083848 |
| ATF4     | 0.322331 | 0.149797 | 0.693587 | 0.003782 |
| A4GALT   | 1.148658 | 0.680109 | 1.940005 | 0.604247 |
| CDC42EP1 | 3.883397 | 1.072574 | 14.06035 | 0.038763 |
| APOL3    | 1.262842 | 0.378734 | 4.210788 | 0.704094 |
| TPST2    | 0.984206 | 0.475466 | 2.037289 | 0.965791 |
| BAIAP2L2 | 0.428995 | 0.160075 | 1.149691 | 0.092448 |
| MPST     | 1.057779 | 0.433462 | 2.581301 | 0.901785 |
| GALR3    | 5.014755 | 0.135202 | 186.0018 | 0.381798 |
| TST      | 0.769596 | 0.462877 | 1.279557 | 0.312677 |
| IGLL1    | 0.781736 | 0.603692 | 1.01229  | 0.061856 |
| APOL2    | 1.296991 | 0.055068 | 30.54723 | 0.871833 |
| RAC2     | 0.702636 | 0.307126 | 1.607474 | 0.403259 |
| LIF      | 0.031475 | 0.002533 | 0.391193 | 0.007147 |
| APOBEC3A | 1.14331  | 0.847523 | 1.542329 | 0.380577 |
| APOBEC3F | 1.749079 | 0.532585 | 5.744202 | 0.356773 |
| RIBC2    | 0.950028 | 0.081961 | 11.012   | 0.967291 |
| KRT17    | 1.566875 | 1.104669 | 2.222472 | 0.011797 |
| DOCK4    | 8.340913 | 0.628353 | 110.7193 | 0.107885 |
| POT1     | 1.195853 | 0.191697 | 7.460035 | 0.848143 |
| ATP6V1F  | 1.470918 | 0.58508  | 3.697955 | 0.411986 |
| LSM8     | 0.453341 | 0.159127 | 1.291528 | 0.138598 |
| PRKRIP1  | 0.306426 | 0.121544 | 0.772531 | 0.012176 |
| VGFB     | 1.660733 | 0.533873 | 5.166082 | 0.380994 |
| PODXL    | 0.05433  | 0.003155 | 0.935478 | 0.044867 |

|          |          |          |          |          |
|----------|----------|----------|----------|----------|
| MKLN1    | 0.724589 | 0.456726 | 1.149549 | 0.171282 |
| DNAJB9   | 1.106544 | 0.669142 | 1.829866 | 0.693218 |
| FLNC     | 0.9461   | 0.553392 | 1.617487 | 0.839526 |
| LRRC4    | 0.158625 | 0.01365  | 1.843376 | 0.141222 |
| CALU     | 0.618855 | 0.287604 | 1.331626 | 0.219663 |
| CCDC136  | 1.077357 | 0.630327 | 1.841422 | 0.785279 |
| SMO      | 1.573772 | 0.802093 | 3.087867 | 0.187278 |
| IRF5     | 1.400549 | 0.982029 | 1.997435 | 0.062908 |
| LRRC17   | 1.366833 | 0.364263 | 5.12881  | 0.643244 |
| KLHDC10  | 0.863204 | 0.173417 | 4.296694 | 0.857432 |
| NDUFA5   | 1.407574 | 0.748643 | 2.646473 | 0.288564 |
| OPN1SW   | 0.172036 | 0.010658 | 2.77705  | 0.214889 |
| MRPS12   | 1.21052  | 0.388103 | 3.775698 | 0.742022 |
| MYO1B    | 1.64582  | 0.85751  | 3.158824 | 0.134176 |
| MTX2     | 0.257299 | 0.085479 | 0.774491 | 0.015757 |
| GAD1     | 0.336733 | 0.077484 | 1.463384 | 0.146492 |
| OSGEPL1  | 0.475346 | 0.161149 | 1.40214  | 0.177807 |
| ORMDL1   | 0.183719 | 0.064581 | 0.522638 | 0.001491 |
| HAT1     | 1.266335 | 0.733133 | 2.187333 | 0.39713  |
| HERC2    | 0.42772  | 0.198734 | 0.920549 | 0.029882 |
| SNRPN    | 0.690267 | 0.492155 | 0.968128 | 0.031743 |
| PSMG2    | 3.999254 | 1.574118 | 10.16063 | 0.003572 |
| TWSG1    | 0.713982 | 0.329437 | 1.547397 | 0.393275 |
| ARHGAP2; | 1.277687 | 1.001078 | 1.630725 | 0.048997 |
| WDFY4    | 1.54932  | 0.60894  | 3.941918 | 0.358154 |
| EIF2AK4  | 0.574296 | 0.245852 | 1.34152  | 0.200111 |
| MYO5C    | 1.291247 | 0.87346  | 1.908867 | 0.199979 |
| CGNL1    | 1.163988 | 0.190473 | 7.113177 | 0.869397 |
| TMOD2    | 1.789164 | 0.631163 | 5.071763 | 0.273819 |
| TTBK2    | 0.038618 | 0.001482 | 1.0062   | 0.050436 |
| ELL3     | 1.032389 | 0.135429 | 7.870027 | 0.975463 |
| INO80    | 1.170692 | 0.32138  | 4.264482 | 0.811154 |
| DLL4     | 0.445808 | 0.017633 | 11.27095 | 0.623993 |
| ALDH1A2  | 7.829767 | 0.513199 | 119.4571 | 0.13883  |
| IVD      | 1.050228 | 0.519742 | 2.122166 | 0.891388 |
| DUT      | 0.301461 | 0.13601  | 0.668176 | 0.003148 |
| CHAC1    | 0.477749 | 0.065435 | 3.488101 | 0.466465 |
| CLN6     | 1.621818 | 0.724292 | 3.631537 | 0.239717 |
| ARPP19   | 0.671183 | 0.291437 | 1.545742 | 0.34888  |
| VPS13C   | 0.913671 | 0.325286 | 2.566345 | 0.863956 |
| LOXL1    | 30.10348 | 0.472239 | 1918.985 | 0.108264 |
| ANAPC13  | 0.613334 | 0.296559 | 1.268477 | 0.187329 |
| MBD4     | 0.943264 | 0.541653 | 1.642652 | 0.8365   |
| COPB1    | 0.964469 | 0.470238 | 1.978149 | 0.92137  |
| PSMA1    | 0.051884 | 0.013002 | 0.207037 | 2.78E-05 |
| SUMF2    | 0.593211 | 0.307664 | 1.143777 | 0.119012 |
| PALLD    | 1.088788 | 0.732057 | 1.619353 | 0.674485 |
| SPCS3    | 0.959707 | 0.416327 | 2.212293 | 0.923108 |
| MYOD1    | 14.69524 | 1.13681  | 189.9614 | 0.039575 |
| SERGEF   | 3.957515 | 1.482311 | 10.56588 | 0.006041 |
| TPH1     | 0.0193   | 0.001235 | 0.301676 | 0.004888 |
| E2F8     | 0.299248 | 0.05919  | 1.512918 | 0.144511 |
| DCTD     | 0.69137  | 0.289624 | 1.650389 | 0.405754 |
| SOX15    | 1.429702 | 1.05698  | 1.933856 | 0.020365 |
| RPAIN    | 0.313777 | 0.144123 | 0.683139 | 0.003501 |
| USP6     | 1.133608 | 0.561093 | 2.290295 | 0.726718 |
| SHBG     | 0.156434 | 0.012609 | 1.940789 | 0.148776 |
| PLD2     | 4.141715 | 1.609229 | 10.65964 | 0.003216 |

|          |          |          |          |          |
|----------|----------|----------|----------|----------|
| CD68     | 1.496487 | 1.062598 | 2.107545 | 0.021026 |
| TXNDC17  | 1.618867 | 0.844022 | 3.105048 | 0.147154 |
| ATP1B2   | 0.922224 | 0.484786 | 1.754378 | 0.805088 |
| FXR2     | 2.61625  | 0.828776 | 8.25888  | 0.101055 |
| KIF1C    | 1.288602 | 0.411369 | 4.036512 | 0.66339  |
| MPDU1    | 1.791387 | 1.034473 | 3.102128 | 0.037439 |
| PHF20L1  | 0.340737 | 0.051787 | 2.241904 | 0.262682 |
| LRRC6    | 0.734673 | 0.296547 | 1.820098 | 0.505336 |
| CCNT1    | 0.591343 | 0.259894 | 1.3455   | 0.2104   |
| PUS7L    | 1.096337 | 0.432015 | 2.782207 | 0.846512 |
| KRI1     | 0.6578   | 0.186143 | 2.324558 | 0.515493 |
| ILF3     | 0.438879 | 0.19252  | 1.000489 | 0.050136 |
| SLC44A2  | 0.917558 | 0.672267 | 1.252348 | 0.587729 |
| CDKN2D   | 1.061901 | 0.623138 | 1.809603 | 0.82522  |
| MTUS1    | 0.008191 | 5.89E-05 | 1.139576 | 0.056381 |
| SIGLEC9  | 1.414568 | 0.798337 | 2.506463 | 0.234717 |
| NGDN     | 0.784143 | 0.376945 | 1.631221 | 0.515276 |
| RIPK3    | 1.641795 | 0.729269 | 3.696154 | 0.231133 |
| ADCY4    | 0.475962 | 0.232334 | 0.975059 | 0.042459 |
| RAB2B    | 0.459243 | 0.220713 | 0.955557 | 0.037382 |
| BCL2L2   | 0.422881 | 0.229647 | 0.77871  | 0.005729 |
| PARP2    | 0.356911 | 0.131866 | 0.966018 | 0.042558 |
| HEATR5A  | 0.26376  | 0.06773  | 1.027158 | 0.05469  |
| SNX6     | 0.736431 | 0.22818  | 2.376769 | 0.608813 |
| EAPP     | 1.039446 | 0.498071 | 2.169266 | 0.91791  |
| NRL      | 0.185286 | 0.010637 | 3.227553 | 0.247559 |
| RNASE1   | 1.911653 | 1.241806 | 2.942827 | 0.003241 |
| NEDD8    | 0.496666 | 0.181738 | 1.357322 | 0.172456 |
| DAD1     | 1.223074 | 0.675381 | 2.214911 | 0.506303 |
| TEP1     | 1.170915 | 0.120423 | 11.38524 | 0.89185  |
| EPB41L4A | 0.685579 | 0.136709 | 3.438109 | 0.646336 |
| REEP5    | 0.931733 | 0.619577 | 1.401159 | 0.734106 |
| ITFG1    | 0.592238 | 0.141575 | 2.477459 | 0.4731   |
| QRICH2   | 0.476523 | 0.054199 | 4.189596 | 0.503935 |
| FOXJ1    | 0.14019  | 0.021194 | 0.927297 | 0.041523 |
| SEC14L1  | 1.281831 | 0.554569 | 2.962824 | 0.561364 |
| RHBDF2   | 1.971023 | 1.004758 | 3.866535 | 0.048408 |
| AANAT    | 0.031251 | 0.001254 | 0.779093 | 0.034679 |
| ARHGEF6  | 0.632694 | 0.389675 | 1.02727  | 0.064146 |
| MAP7D3   | 0.749836 | 0.231656 | 2.427113 | 0.630946 |
| ASH2L    | 0.408192 | 0.195704 | 0.851389 | 0.016899 |
| CHRNA10  | 0.270041 | 0.056701 | 1.286089 | 0.100174 |
| CDKN1C   | 1.416137 | 0.968056 | 2.071619 | 0.073022 |
| RPS4Y1   | 0.997956 | 0.891671 | 1.116911 | 0.971593 |
| KLF16    | 0.590742 | 0.116827 | 2.987115 | 0.524406 |
| DOHH     | 1.882869 | 0.872142 | 4.064932 | 0.107057 |
| SHC2     | 21.07066 | 0.334765 | 1326.221 | 0.149256 |
| LBP      | 0.346065 | 0.067574 | 1.772297 | 0.202921 |
| CBFA2T3  | 3.132272 | 0.991145 | 9.898784 | 0.051797 |
| GAMT     | 0.642093 | 0.327554 | 1.258673 | 0.197033 |
| PHF10    | 0.573185 | 0.147713 | 2.224187 | 0.421125 |
| PRRG3    | 0.174508 | 0.012581 | 2.4205   | 0.193212 |
| STARD8   | 1.757012 | 1.221466 | 2.527364 | 0.002378 |
| GDPD2    | 6.44024  | 0.603476 | 68.72967 | 0.123104 |
| SAT1     | 0.88406  | 0.602247 | 1.297743 | 0.52921  |
| GNL3L    | 0.743841 | 0.320831 | 1.72458  | 0.490359 |
| SH3BP4   | 1.35176  | 0.998207 | 1.830536 | 0.051371 |
| MOSPD2   | 1.071665 | 0.530559 | 2.164632 | 0.846993 |



|         |          |          |          |          |
|---------|----------|----------|----------|----------|
| DOCK6   | 1.541365 | 0.673814 | 3.525911 | 0.305444 |
| ECSIT   | 2.830327 | 1.267055 | 6.322334 | 0.011175 |
| LDLR    | 1.336572 | 0.981784 | 1.819571 | 0.065305 |
| ELOF1   | 2.15822  | 1.087498 | 4.283148 | 0.027819 |
| TSPAN16 | 0.490394 | 0.053207 | 4.519865 | 0.529485 |
| PRKCSH  | 1.270248 | 0.558174 | 2.890728 | 0.568564 |
| CDC16   | 0.493293 | 0.239071 | 1.017849 | 0.055864 |
| APOE    | 0.96753  | 0.734671 | 1.274195 | 0.814224 |
| TOMM40  | 0.515136 | 0.240768 | 1.10216  | 0.087394 |
| APOC1   | 0.690469 | 0.477188 | 0.999077 | 0.04943  |
| GADD45G | 0.607856 | 0.336767 | 1.097163 | 0.098492 |
| XPO7    | 1.131714 | 0.716501 | 1.787544 | 0.59574  |
| FAM98C  | 3.079087 | 1.100858 | 8.612172 | 0.032107 |
| SAFB2   | 0.69885  | 0.317665 | 1.537441 | 0.373069 |
| RPL36   | 0.912779 | 0.297804 | 2.797701 | 0.87312  |
| ATP8B3  | 1.105614 | 0.692056 | 1.766305 | 0.674459 |
| GTPBP3  | 1.833062 | 0.412046 | 8.154714 | 0.426189 |
| PLVAP   | 4.126045 | 1.153806 | 14.75487 | 0.029256 |
| BST2    | 1.403593 | 0.965267 | 2.040962 | 0.075915 |
| SLC27A1 | 1.834317 | 1.073364 | 3.134743 | 0.026493 |
| NSUN5   | 0.481908 | 0.223694 | 1.038179 | 0.062283 |
| USHBP1  | 1.286409 | 0.138558 | 11.94338 | 0.824685 |
| DDA1    | 0.86361  | 0.345792 | 2.156848 | 0.753521 |
| MRPL34  | 2.63521  | 1.135304 | 6.116716 | 0.024112 |
| PGLS    | 2.272973 | 1.289868 | 4.005377 | 0.004504 |
| LSM7    | 1.312126 | 0.698937 | 2.463276 | 0.397931 |
| TULP4   | 0.680681 | 0.211462 | 2.191068 | 0.518991 |
| SNX9    | 0.206919 | 0.020189 | 2.120768 | 0.184569 |
| RTN4IP1 | 0.356296 | 0.113215 | 1.121288 | 0.077689 |
| QRSL1   | 0.394793 | 0.055008 | 2.833446 | 0.35536  |
| RSPH3   | 0.586979 | 0.275907 | 1.248772 | 0.166608 |
| MLLT1   | 0.983053 | 0.157133 | 6.150176 | 0.985423 |
| FUT5    | 0.13259  | 0.011463 | 1.533623 | 0.105748 |
| ACTN4   | 1.392493 | 0.608197 | 3.188174 | 0.433389 |
| NDUFA10 | 0.821461 | 0.299469 | 2.253313 | 0.70246  |
| ARPC1B  | 1.513018 | 0.936945 | 2.443284 | 0.090342 |
| ZSWIM6  | 1.647666 | 0.957394 | 2.835619 | 0.071423 |
| FCHO1   | 1.577951 | 0.883871 | 2.817072 | 0.12295  |
| MAP1S   | 2.100152 | 1.209565 | 3.646466 | 0.008393 |
| KLHDC7B | 2.284696 | 0.850671 | 6.13614  | 0.101189 |
| PXDN    | 1.194785 | 0.972209 | 1.468317 | 0.090646 |
| SSBP4   | 2.314925 | 1.265863 | 4.233379 | 0.006421 |
| GDF15   | 1.054044 | 0.822314 | 1.351076 | 0.67776  |
| PGPEP1  | 0.797571 | 0.191411 | 3.323311 | 0.756082 |
| LSM4    | 0.769155 | 0.36727  | 1.610806 | 0.486483 |
| JUND    | 1.04899  | 0.468582 | 2.34832  | 0.907397 |
| HRC     | 0.118206 | 0.011383 | 1.227515 | 0.07373  |
| TRPM4   | 1.082806 | 0.780658 | 1.501899 | 0.633656 |
| SULT4A1 | 0.342278 | 0.011525 | 10.1653  | 0.535481 |
| ZNF557  | 2.7939   | 0.881677 | 8.853446 | 0.080817 |
| CRB3    | 7.722107 | 0.342538 | 174.0857 | 0.198459 |
| CAMSAP1 | 0.818887 | 0.35655  | 1.880732 | 0.637644 |
| UBAC1   | 0.858107 | 0.474751 | 1.551019 | 0.612376 |
| ZBTB46  | 1.24024  | 0.870604 | 1.766813 | 0.233069 |
| SAMD10  | 2.814242 | 0.548063 | 14.4508  | 0.215145 |
| LSP1    | 2.18434  | 1.113089 | 4.286575 | 0.02312  |
| TNNT3   | 0.748389 | 0.316315 | 1.770658 | 0.509493 |
| TNNI2   | 1.221698 | 0.694084 | 2.150383 | 0.487598 |

|         |          |          |          |          |
|---------|----------|----------|----------|----------|
| H19     | 1.53446  | 1.228806 | 1.916144 | 0.000158 |
| COL5A1  | 0.875553 | 0.562644 | 1.362483 | 0.555835 |
| ATXN10  | 0.429351 | 0.104667 | 1.761218 | 0.240387 |
| TUBGCP2 | 2.780437 | 1.106199 | 6.988644 | 0.029661 |
| CYP2E1  | 0.559613 | 0.313645 | 0.998474 | 0.049399 |
| PNPLA7  | 0.999249 | 0.614373 | 1.625233 | 0.997584 |
| HBZ     | 1.123664 | 0.906475 | 1.392891 | 0.287353 |
| PAK4    | 3.612256 | 0.968702 | 13.46998 | 0.055798 |
| MNX1    | 1.163794 | 0.792472 | 1.709105 | 0.439142 |
| ZNF337  | 0.453933 | 0.21364  | 0.964499 | 0.039979 |
| TAF4    | 1.613491 | 0.664628 | 3.917004 | 0.290427 |
| LAMA5   | 0.836984 | 0.684841 | 1.022927 | 0.082122 |
| OSBPL2  | 0.558868 | 0.161049 | 1.939367 | 0.359373 |
| ADRM1   | 0.733372 | 0.452878 | 1.187593 | 0.207348 |
| ASS1    | 2.838273 | 1.128838 | 7.136358 | 0.026583 |
| EXOSC2  | 0.23121  | 0.090322 | 0.59186  | 0.002261 |
| POMT1   | 0.24128  | 0.058581 | 0.993775 | 0.048998 |
| UCK1    | 2.607658 | 0.471116 | 14.43356 | 0.272271 |
| FIBCD1  | 1.683957 | 0.645213 | 4.395001 | 0.286994 |
| CHMP2A  | 1.324478 | 0.337413 | 5.1991   | 0.687111 |
| UBE2M   | 0.629167 | 0.237187 | 1.66894  | 0.35189  |
| TRIM28  | 1.154643 | 0.686167 | 1.942969 | 0.588142 |
| YIPF2   | 0.275365 | 0.068348 | 1.109407 | 0.069688 |
| ATG4D   | 1.495752 | 0.552993 | 4.045753 | 0.427735 |
| EIF2S3  | 0.546596 | 0.293482 | 1.018007 | 0.056947 |
| TMEM160 | 1.320552 | 0.765818 | 2.277116 | 0.317215 |
| ZC3H4   | 1.405639 | 0.615156 | 3.2119   | 0.419339 |
| NPAS1   | 0.894959 | 0.526445 | 1.521434 | 0.681871 |
| GMFG    | 1.335887 | 0.573117 | 3.113838 | 0.502404 |
| MAP3K10 | 1.401462 | 0.322068 | 6.098384 | 0.652813 |
| LRRC47  | 0.552316 | 0.205417 | 1.485046 | 0.239456 |
| SESN2   | 1.490771 | 0.629064 | 3.532861 | 0.36439  |
| SMPDL3B | 0.479809 | 0.169262 | 1.360125 | 0.167158 |
| MED18   | 1.054191 | 0.251792 | 4.413644 | 0.942416 |
| CLIP1   | 1.527164 | 0.422151 | 5.524642 | 0.518661 |
| CCDC62  | 0.041195 | 0.00387  | 0.438562 | 0.008217 |
| HIP1R   | 0.090831 | 0.008704 | 0.947834 | 0.044991 |
| ZNF317  | 0.496671 | 0.218562 | 1.128658 | 0.094725 |
| PPAN    | 1.178976 | 0.613629 | 2.265188 | 0.621183 |
| EIF3G   | 1.540999 | 0.686926 | 3.456963 | 0.294179 |
| ANGPTL6 | 0.886038 | 0.54584  | 1.438268 | 0.624466 |
| DNMT1   | 0.45608  | 0.237761 | 0.874865 | 0.018167 |
| ZNF426  | 0.769961 | 0.376375 | 1.575131 | 0.474091 |
| SLC6A8  | 1.02484  | 0.633151 | 1.658841 | 0.920455 |
| DKC1    | 0.488623 | 0.278195 | 0.85822  | 0.012703 |
| PLXNA3  | 1.199028 | 0.651009 | 2.208371 | 0.560232 |
| MPP1    | 0.769236 | 0.48752  | 1.213741 | 0.259532 |
| ZNF331  | 1.068459 | 0.417941 | 2.731496 | 0.890028 |
| ZNF236  | 0.418808 | 0.140445 | 1.24889  | 0.11846  |
| LRP3    | 1.110441 | 0.803396 | 1.534832 | 0.525845 |
| NOL11   | 0.577843 | 0.297283 | 1.123179 | 0.105793 |
| UBE4B   | 0.465053 | 0.233814 | 0.924985 | 0.029093 |
| CASZ1   | 1.12994  | 0.302169 | 4.225334 | 0.855944 |
| PKDREJ  | 0.218699 | 0.026862 | 1.78054  | 0.155392 |
| HABP4   | 1.163098 | 0.430656 | 3.141249 | 0.765662 |
| SLC35D2 | 1.521543 | 0.658225 | 3.517178 | 0.32622  |
| PRRG1   | 0.542515 | 0.129185 | 2.2783   | 0.403562 |
| UBA1    | 1.473585 | 0.737467 | 2.944478 | 0.272329 |

|           |          |          |          |          |
|-----------|----------|----------|----------|----------|
| PPIL4     | 0.096494 | 0.009229 | 1.008913 | 0.050872 |
| ULBP2     | 2.649181 | 0.61363  | 11.43711 | 0.19171  |
| AKAP12    | 0.761374 | 0.038188 | 15.17986 | 0.858286 |
| SYNE1     | 0.057518 | 0.000387 | 8.555524 | 0.263184 |
| ULBP3     | 0.184342 | 0.01823  | 1.864032 | 0.15202  |
| LATS1     | 0.434259 | 0.032555 | 5.792706 | 0.528017 |
| EPS8L1    | 0.131501 | 0.001034 | 16.72962 | 0.41191  |
| LILRB2    | 1.453347 | 0.891786 | 2.368524 | 0.133523 |
| TTLL9     | 0.197904 | 0.002899 | 13.51214 | 0.452198 |
| RBM39     | 0.564128 | 0.15257  | 2.085861 | 0.390867 |
| ZNF341    | 1.430784 | 0.638791 | 3.204715 | 0.383938 |
| GGT7      | 0.481638 | 0.107492 | 2.158073 | 0.339717 |
| ACSS2     | 5.790086 | 1.926379 | 17.40316 | 0.001762 |
| EDA2R     | 0.435725 | 0.064477 | 2.944583 | 0.394127 |
| ARHGEF9   | 1.458155 | 0.272842 | 7.792838 | 0.659165 |
| HIGD1B    | 0.241015 | 0.017843 | 3.255457 | 0.284037 |
| ATP6V1E1  | 0.352999 | 0.145857 | 0.854318 | 0.020937 |
| ZNF227    | 0.406961 | 0.114016 | 1.452577 | 0.166091 |
| ZNF428    | 0.665992 | 0.346462 | 1.280212 | 0.222809 |
| ZNF141    | 0.410528 | 0.088744 | 1.899101 | 0.254599 |
| CCL25     | 2.248555 | 0.652711 | 7.74615  | 0.199158 |
| COX4I1    | 1.145726 | 0.345843 | 3.795616 | 0.823848 |
| GIN52     | 0.57736  | 0.384733 | 0.86643  | 0.007996 |
| CHMP1A    | 2.337649 | 1.061636 | 5.14734  | 0.03499  |
| SH3BGRL   | 0.566405 | 0.214827 | 1.493362 | 0.250468 |
| COX7B     | 1.166405 | 0.733236 | 1.855475 | 0.515761 |
| F12       | 1.155232 | 0.738778 | 1.806444 | 0.526973 |
| PRR7      | 1.495413 | 0.977681 | 2.28731  | 0.063473 |
| NFATC1    | 4.771179 | 1.935065 | 11.76402 | 0.00069  |
| CAP1      | 1.296501 | 0.678432 | 2.477645 | 0.431961 |
| PPT1      | 0.83     | 0.452682 | 1.521817 | 0.546904 |
| RAB11FIP4 | 1.340557 | 0.524104 | 3.428885 | 0.540766 |
| ABC7      | 0.21605  | 0.087242 | 0.535037 | 0.000927 |
| TRAF3     | 0.568822 | 0.180024 | 1.797305 | 0.336473 |
| HAUS8     | 1.835914 | 0.569481 | 5.918685 | 0.309036 |
| MRPS25    | 0.294519 | 0.140629 | 0.616806 | 0.001191 |
| SH3BP5    | 9.067897 | 0.42232  | 194.7024 | 0.158817 |
| HACL1     | 0.263565 | 0.144212 | 0.481698 | 1.46E-05 |
| TBC1D5    | 0.46348  | 0.099709 | 2.154403 | 0.32663  |
| CAPN7     | 0.428365 | 0.078687 | 2.331989 | 0.326793 |
| RFTN1     | 1.084577 | 0.691563 | 1.70094  | 0.723617 |
| SLC6A6    | 1.742432 | 0.667581 | 4.547864 | 0.25662  |
| KCNC3     | 0.374142 | 0.019468 | 7.190288 | 0.514474 |
| NAPSA     | 1.276176 | 1.013768 | 1.606506 | 0.037858 |
| NAPSB     | 1.232617 | 1.024121 | 1.483559 | 0.026962 |
| NR1H2     | 1.431672 | 0.705025 | 2.907247 | 0.32077  |
| LRR4B     | 4.409133 | 0.143745 | 135.2426 | 0.395638 |
| PDLIM4    | 1.674581 | 0.111208 | 25.21597 | 0.709439 |
| KIF3A     | 0.104867 | 0.008382 | 1.31201  | 0.080238 |
| MGAT1     | 1.941669 | 1.170434 | 3.221095 | 0.010189 |
| TUBG1     | 0.858847 | 0.415599 | 1.77483  | 0.681168 |
| PSME3     | 0.778856 | 0.326078 | 1.860342 | 0.573706 |
| RPL27     | 0.682202 | 0.19475  | 2.389726 | 0.549898 |
| PSMC3IP   | 0.138652 | 0.022791 | 0.843497 | 0.031976 |
| AOC3      | 0.584492 | 0.0683   | 5.001945 | 0.623945 |
| ACLY      | 0.635493 | 0.292137 | 1.382404 | 0.252908 |
| VPS25     | 1.962642 | 0.721065 | 5.342046 | 0.186886 |
| RAMP2     | 0.984949 | 0.058909 | 16.46815 | 0.99158  |

|         |          |          |          |          |
|---------|----------|----------|----------|----------|
| AOC2    | 7.297371 | 0.094106 | 565.8702 | 0.37061  |
| NDUFA2  | 1.437663 | 0.469967 | 4.39792  | 0.524552 |
| ANKHD1  | 0.217781 | 0.018431 | 2.573277 | 0.226361 |
| DIAPH1  | 1.43365  | 0.673201 | 3.053103 | 0.350316 |
| NDFIP1  | 1.641315 | 1.091401 | 2.468309 | 0.017309 |
| UBE2D2  | 0.257959 | 0.065968 | 1.008714 | 0.051476 |
| EXOC4   | 0.35562  | 0.105079 | 1.203526 | 0.096485 |
| ACAP3   | 1.279746 | 0.46543  | 3.518787 | 0.63267  |
| PPFIA1  | 0.597857 | 0.168749 | 2.118132 | 0.425425 |
| TMEM204 | 1.473556 | 0.957695 | 2.267287 | 0.077841 |
| KREMEN2 | 0.091715 | 0.006708 | 1.253899 | 0.073389 |
| THOC6   | 0.921117 | 0.494626 | 1.715351 | 0.795631 |
| TRAF7   | 3.101217 | 0.890303 | 10.80255 | 0.075489 |
| BARX1   | 0.196729 | 0.01689  | 2.291425 | 0.194282 |
| NINJ1   | 1.243445 | 0.975816 | 1.584476 | 0.078071 |
| CA6     | 0.507085 | 0.065659 | 3.916219 | 0.514987 |
| NPHP4   | 2.803322 | 1.011127 | 7.772131 | 0.047565 |
| MAP1B   | 0.739364 | 0.006898 | 79.25283 | 0.899251 |
| IL13RA1 | 1.10069  | 0.852427 | 1.421258 | 0.461949 |
| WDR44   | 1.105541 | 0.289631 | 4.219925 | 0.88328  |
| CKMT2   | 0.601911 | 0.051732 | 7.003382 | 0.685154 |
| ZCCHC9  | 0.555311 | 0.216068 | 1.427193 | 0.221943 |
| TOP2A   | 0.852016 | 0.620884 | 1.16919  | 0.321262 |
| STARD3  | 1.540074 | 0.72125  | 3.288499 | 0.264549 |
| RARA    | 3.539365 | 1.33282  | 9.398944 | 0.011196 |
| PPP1R1B | 0.749363 | 0.024436 | 22.98065 | 0.868786 |
| KHDRBS3 | 0.965858 | 0.655836 | 1.42243  | 0.860383 |
| CHD1L   | 0.492397 | 0.267221 | 0.90732  | 0.023096 |
| PEX11B  | 1.4251   | 0.769473 | 2.63935  | 0.25992  |
| FMO5    | 0.871801 | 0.291981 | 2.603034 | 0.805822 |
| PIAS3   | 1.890989 | 0.598373 | 5.975939 | 0.277826 |
| PRKAB2  | 0.572637 | 0.203333 | 1.612688 | 0.291278 |
| PDHA1   | 0.291812 | 0.109286 | 0.779187 | 0.013976 |
| RAI2    | 6.130977 | 0.377822 | 99.48821 | 0.202171 |
| MCCC2   | 0.346716 | 0.079253 | 1.516807 | 0.159516 |
| ZNF304  | 2.04023  | 0.814266 | 5.112011 | 0.128126 |
| ZSCAN5A | 0.976857 | 0.349619 | 2.729401 | 0.964375 |
| ZNF132  | 0.891116 | 0.15434  | 5.145053 | 0.897462 |
| CHSY1   | 0.453218 | 0.250709 | 0.819302 | 0.0088   |
| SNRPA1  | 0.315086 | 0.15736  | 0.630903 | 0.001113 |
| LLGL1   | 1.737057 | 0.895951 | 3.367782 | 0.102111 |
| THAP1   | 1.451893 | 0.464954 | 4.533769 | 0.521003 |
| ACTR10  | 0.564541 | 0.221851 | 1.436577 | 0.230227 |
| ABHD12B | 0.330671 | 0.096364 | 1.134698 | 0.078562 |
| GCH1    | 1.689473 | 0.971635 | 2.937645 | 0.063167 |
| LGALS3  | 1.126996 | 0.902483 | 1.40736  | 0.291538 |
| PODNL1  | 2.780628 | 0.377968 | 20.45645 | 0.315184 |
| DNAJB1  | 1.038506 | 0.709587 | 1.519889 | 0.845832 |
| ZSWIM4  | 0.882607 | 0.34046  | 2.288061 | 0.797228 |
| FBXW9   | 0.779281 | 0.388665 | 1.562473 | 0.482289 |
| RFX1    | 1.56552  | 0.825834 | 2.96773  | 0.169583 |
| ZNF20   | 0.822193 | 0.422214 | 1.601086 | 0.564777 |
| DCAF15  | 2.382843 | 1.047311 | 5.42145  | 0.038436 |
| CC2D1A  | 3.271785 | 1.175061 | 9.109807 | 0.023285 |
| TRIM21  | 2.397997 | 1.203654 | 4.777445 | 0.012881 |
| SPATA6  | 0.976383 | 0.41806  | 2.280349 | 0.955958 |
| LRRC41  | 0.886343 | 0.379632 | 2.069383 | 0.780328 |
| CCT6B   | 0.653701 | 0.258336 | 1.654146 | 0.369474 |

|          |          |          |          |          |
|----------|----------|----------|----------|----------|
| DHX30    | 1.749668 | 0.606168 | 5.050314 | 0.300964 |
| RAF1     | 1.182612 | 0.465835 | 3.002291 | 0.724198 |
| PPARG    | 1.293155 | 0.445804 | 3.751087 | 0.636112 |
| NUP210   | 1.064149 | 0.654328 | 1.730651 | 0.802141 |
| FCRLA    | 1.171233 | 0.777125 | 1.765207 | 0.450137 |
| HSD17B7  | 1.039214 | 0.548711 | 1.968186 | 0.906032 |
| ENOSF1   | 0.64275  | 0.395931 | 1.043432 | 0.073779 |
| EMILIN2  | 1.35468  | 0.876403 | 2.093963 | 0.171873 |
| ARFIP2   | 0.790986 | 0.098353 | 6.361368 | 0.825526 |
| TRIM5    | 0.806169 | 0.317437 | 2.047362 | 0.650476 |
| CNGA4    | 0.603373 | 0.011118 | 32.74588 | 0.804192 |
| TRIM22   | 1.237932 | 0.761192 | 2.013257 | 0.389664 |
| RRP8     | 0.915616 | 0.330218 | 2.538781 | 0.865462 |
| EFR3A    | 1.036462 | 0.648956 | 1.655359 | 0.880829 |
| PTCD3    | 0.137026 | 0.022118 | 0.848919 | 0.032681 |
| IMMT     | 1.092756 | 0.457913 | 2.607737 | 0.841572 |
| MRPL35   | 0.69641  | 0.280415 | 1.729532 | 0.435645 |
| ILKAP    | 0.133875 | 0.021528 | 0.832531 | 0.031042 |
| PER2     | 0.249326 | 0.048656 | 1.277608 | 0.095694 |
| RAMP1    | 0.507383 | 0.306785 | 0.839147 | 0.008214 |
| SCLY     | 0.432992 | 0.136151 | 1.377021 | 0.156193 |
| PTPRE    | 1.322148 | 0.755357 | 2.314238 | 0.328226 |
| RAN      | 0.407239 | 0.18584  | 0.892397 | 0.024808 |
| PRKAA1   | 0.761161 | 0.38808  | 1.492905 | 0.427171 |
| CARD6    | 1.834072 | 0.478128 | 7.035402 | 0.376564 |
| INPP5K   | 2.772741 | 1.025343 | 7.49807  | 0.044508 |
| MYBBP1A  | 1.356101 | 0.613194 | 2.999067 | 0.451915 |
| RPA1     | 0.306316 | 0.133014 | 0.705409 | 0.005437 |
| SERPINF1 | 0.788574 | 0.443454 | 1.402286 | 0.418655 |
| UBE2G1   | 0.441371 | 0.109451 | 1.779872 | 0.250314 |
| EEFSEC   | 0.613332 | 0.175422 | 2.14441  | 0.444002 |
| TBC1D14  | 1.759086 | 1.012624 | 3.055807 | 0.045018 |
| TMEM128  | 1.460451 | 0.589059 | 3.620891 | 0.413606 |
| COQ3     | 0.391101 | 0.159094 | 0.961447 | 0.040792 |
| SEC61G   | 1.089605 | 0.694056 | 1.71058  | 0.709206 |
| LANCL2   | 0.498569 | 0.180085 | 1.380302 | 0.180368 |
| FIGNL1   | 0.461351 | 0.179624 | 1.184949 | 0.107975 |
| GRSF1    | 0.481895 | 0.220037 | 1.055381 | 0.067971 |
| ANKRD17  | 0.424043 | 0.142807 | 1.259131 | 0.122345 |
| UTP3     | 1.19606  | 0.395098 | 3.620774 | 0.751401 |
| ITGB4    | 0.033393 | 0.000285 | 3.906739 | 0.161779 |
| WBP2     | 1.097897 | 0.584455 | 2.062396 | 0.771554 |
| UNK      | 0.460309 | 0.049385 | 4.29048  | 0.495733 |
| TRIM47   | 1.527665 | 0.928997 | 2.51213  | 0.09497  |
| ZRANB2   | 0.564903 | 0.297314 | 1.073329 | 0.08118  |
| EIF5A    | 0.565862 | 0.300559 | 1.065347 | 0.077753 |
| KDM6B    | 2.747333 | 1.215816 | 6.208045 | 0.015108 |
| CLEC10A  | 1.745734 | 1.090941 | 2.79354  | 0.020188 |
| GUCY2D   | 3.242094 | 0.53534  | 19.63456 | 0.20055  |
| GPS2     | 1.721897 | 0.708066 | 4.187363 | 0.230698 |
| XAF1     | 1.033086 | 0.608671 | 1.753435 | 0.904013 |
| DLG4     | 2.518651 | 1.472861 | 4.306993 | 0.00074  |
| VPS13B   | 0.231812 | 0.008483 | 6.334903 | 0.386409 |
| MATN2    | 1.66562  | 0.757097 | 3.66438  | 0.204707 |
| REEP2    | 1.575264 | 0.300049 | 8.270174 | 0.591192 |
| PCBD2    | 0.285941 | 0.046957 | 1.741231 | 0.174375 |
| SDF2     | 0.590556 | 0.21641  | 1.611551 | 0.30381  |
| FLOT2    | 0.740862 | 0.350789 | 1.564689 | 0.431681 |

|          |          |          |          |          |
|----------|----------|----------|----------|----------|
| ERAL1    | 0.978815 | 0.457627 | 2.09358  | 0.955979 |
| PRMT7    | 1.073809 | 0.49607  | 2.324404 | 0.856574 |
| NIP7     | 0.44331  | 0.210241 | 0.934755 | 0.03258  |
| TERF2    | 1.885928 | 0.921609 | 3.859254 | 0.082472 |
| VPS4A    | 2.247903 | 0.763807 | 6.615635 | 0.141363 |
| HSPA12B  | 1.09303  | 0.082933 | 14.40578 | 0.946095 |
| BTBD3    | 1.017468 | 0.306364 | 3.379124 | 0.977441 |
| PCNA     | 0.20864  | 0.057215 | 0.760831 | 0.017594 |
| NXT1     | 0.571064 | 0.303451 | 1.074687 | 0.082443 |
| POLR3F   | 0.187236 | 0.064473 | 0.543749 | 0.00207  |
| RIN2     | 1.551308 | 1.069108 | 2.250994 | 0.02079  |
| PTPRA    | 1.647147 | 0.228162 | 11.89111 | 0.620736 |
| DAP3     | 0.58587  | 0.228071 | 1.504982 | 0.266683 |
| ARHGEF11 | 2.310306 | 0.833083 | 6.406939 | 0.107605 |
| FCRL2    | 0.192928 | 0.005136 | 7.247732 | 0.3738   |
| SYT11    | 1.125384 | 0.644503 | 1.965063 | 0.677881 |
| IGHMBP2  | 2.954729 | 0.818069 | 10.672   | 0.098231 |
| ACY3     | 0.950511 | 0.666229 | 1.356098 | 0.77953  |
| MMACHC   | 0.578986 | 0.2744   | 1.221667 | 0.151451 |
| DPH2     | 0.454314 | 0.128187 | 1.610161 | 0.221663 |
| TOE1     | 0.485758 | 0.159987 | 1.474877 | 0.202583 |
| NASP     | 0.143474 | 0.055845 | 0.368601 | 5.50E-05 |
| MUTYH    | 1.011601 | 0.273219 | 3.745481 | 0.986221 |
| CTNBL1   | 0.436627 | 0.227753 | 0.837059 | 0.012574 |
| LPIN3    | 0.056208 | 0.003819 | 0.827264 | 0.035889 |
| ZSWIM3   | 9.260983 | 0.614145 | 139.6508 | 0.107878 |
| RBM38    | 1.189982 | 0.934103 | 1.515953 | 0.159098 |
| VSTM2L   | 1.671912 | 0.572159 | 4.885508 | 0.347509 |
| SERINC3  | 0.394583 | 0.079086 | 1.96869  | 0.256808 |
| PPP1R3D  | 1.892474 | 0.77226  | 4.637632 | 0.163061 |
| AP3B1    | 0.77109  | 0.372767 | 1.595048 | 0.483331 |
| ZBED3    | 0.700264 | 0.378352 | 1.296065 | 0.256654 |
| ANGPTL3  | 4.57728  | 0.324703 | 64.52503 | 0.25985  |
| FBXO44   | 0.061481 | 0.002084 | 1.813836 | 0.106281 |
| CASP9    | 0.719552 | 0.201786 | 2.565859 | 0.611898 |
| DCTN4    | 1.020359 | 0.479986 | 2.169088 | 0.958227 |
| PDE6A    | 0.034733 | 0.000644 | 1.874174 | 0.098686 |
| MTUS2    | 0.129792 | 0.001888 | 8.921039 | 0.344137 |
| ZMYM5    | 0.400274 | 0.16066  | 0.997257 | 0.049315 |
| USPL1    | 0.526491 | 0.290099 | 0.955511 | 0.034891 |
| XPO4     | 0.693358 | 0.292555 | 1.643263 | 0.40552  |
| POMP     | 0.338757 | 0.050061 | 2.292344 | 0.267172 |
| CDK8     | 0.20129  | 0.0489   | 0.828579 | 0.026389 |
| ALOX5AP  | 0.988484 | 0.748441 | 1.305515 | 0.934961 |
| WASF3    | 0.291766 | 0.045295 | 1.879401 | 0.194946 |
| GPR12    | 1.016399 | 0.670887 | 1.539852 | 0.938829 |
| MYH10    | 1.029141 | 0.808853 | 1.309422 | 0.815189 |
| PEMT     | 0.74632  | 0.218458 | 2.54966  | 0.640646 |
| SCO1     | 0.758232 | 0.314546 | 1.827764 | 0.537551 |
| MPRIIP   | 0.424076 | 0.108844 | 1.652286 | 0.216356 |
| CHI3L1   | 1.093365 | 0.613073 | 1.949924 | 0.762349 |
| MYBPH    | 1.368977 | 0.976045 | 1.920095 | 0.068836 |
| PIK3C2B  | 1.367247 | 0.673458 | 2.775772 | 0.386617 |
| DSTYK    | 0.831767 | 0.361988 | 1.911214 | 0.664315 |
| CHIT1    | 1.467238 | 0.538245 | 3.999642 | 0.453677 |
| SLC41A1  | 0.914003 | 0.422137 | 1.978983 | 0.819534 |
| LGR6     | 0.078009 | 0.001075 | 5.658507 | 0.243192 |
| TMCC2    | 1.115775 | 0.889689 | 1.399313 | 0.343006 |

|          |          |          |          |          |
|----------|----------|----------|----------|----------|
| CCNA1    | 0.908841 | 0.734579 | 1.124443 | 0.378822 |
| COG6     | 0.459265 | 0.178139 | 1.184041 | 0.107321 |
| RXFP2    | 2.229786 | 0.144441 | 34.42186 | 0.565772 |
| EPST11   | 1.146648 | 0.882399 | 1.49003  | 0.305896 |
| RFXAP    | 0.071718 | 0.01109  | 0.463787 | 0.005663 |
| TPT1     | 2.545271 | 0.00401  | 1615.696 | 0.776608 |
| RFC3     | 0.3063   | 0.093289 | 1.005692 | 0.051104 |
| STARD13  | 28.26051 | 0.355572 | 2246.117 | 0.13445  |
| MORC4    | 14.1378  | 1.195159 | 167.2391 | 0.035606 |
| BEX2     | 1.27723  | 0.989955 | 1.647869 | 0.059795 |
| TCEAL4   | 0.537176 | 0.260384 | 1.108202 | 0.092588 |
| BEX1     | 1.004409 | 0.834855 | 1.208397 | 0.962808 |
| FAM104A  | 1.072657 | 0.564228 | 2.039236 | 0.83056  |
| SLC39A11 | 0.974722 | 0.51618  | 1.840603 | 0.937082 |
| EPHB2    | 4.63143  | 0.513961 | 41.73493 | 0.171761 |
| SRRM1    | 0.337972 | 0.143401 | 0.796544 | 0.013138 |
| BTBD2    | 0.78342  | 0.434255 | 1.413333 | 0.417482 |
| PRAM1    | 1.224314 | 0.695457 | 2.155339 | 0.483086 |
| ZNF414   | 3.492546 | 1.302085 | 9.367958 | 0.01298  |
| PDE6B    | 0.584798 | 0.192499 | 1.776576 | 0.343999 |
| HSPBP1   | 1.33717  | 0.458424 | 3.900366 | 0.594749 |
| CSNK1G2  | 0.687653 | 0.286606 | 1.64988  | 0.401675 |
| CNDP2    | 0.954525 | 0.611619 | 1.489682 | 0.837619 |
| MACROD1  | 1.046974 | 0.660297 | 1.660093 | 0.845256 |
| WDR74    | 0.686792 | 0.269794 | 1.748309 | 0.430621 |
| LGALS12  | 0.826999 | 0.409045 | 1.672009 | 0.59691  |
| RTN3     | 1.318647 | 0.423218 | 4.108592 | 0.633337 |
| MYH11    | 0.046507 | 0.002476 | 0.873581 | 0.040337 |
| MED10    | 0.312502 | 0.124575 | 0.783926 | 0.013184 |
| PDZD2    | 1.275252 | 0.262527 | 6.194656 | 0.763024 |
| MORC2    | 0.938378 | 0.383855 | 2.293971 | 0.889089 |
| MYO18B   | 0.146271 | 0.023827 | 0.89793  | 0.037871 |
| SLC2A11  | 1.379764 | 0.134935 | 14.10868 | 0.786095 |
| C1QTNF6  | 0.656755 | 0.019156 | 22.51608 | 0.815657 |
| FAM83F   | 1.052428 | 0.450726 | 2.45738  | 0.905984 |
| SEC14L4  | 0.958231 | 0.626036 | 1.466697 | 0.844257 |
| GIMAP6   | 2.260458 | 1.099587 | 4.646898 | 0.026544 |
| GIMAP4   | 1.187219 | 0.934156 | 1.508837 | 0.160589 |
| ADCK2    | 1.326084 | 0.67851  | 2.591707 | 0.409084 |
| MKRN1    | 0.960955 | 0.542747 | 1.701407 | 0.891314 |
| AGAP3    | 1.976639 | 0.507477 | 7.699074 | 0.325995 |
| KRBA1    | 0.898123 | 0.541511 | 1.489583 | 0.677235 |
| ACTR3B   | 1.553604 | 0.086479 | 27.91052 | 0.764973 |
| BTG1     | 1.052491 | 0.761502 | 1.454673 | 0.756684 |
| ATP13A3  | 0.904584 | 0.030842 | 26.53148 | 0.953611 |
| KRAS     | 1.254725 | 0.302534 | 5.203824 | 0.754541 |
| IPO8     | 0.818457 | 0.458164 | 1.462077 | 0.498561 |
| IMPA1    | 0.769706 | 0.426357 | 1.389559 | 0.385156 |
| LRRCC1   | 0.724788 | 0.178534 | 2.942389 | 0.652519 |
| E2F5     | 1.591623 | 0.800915 | 3.162964 | 0.184712 |
| CA1      | 1.075718 | 0.928388 | 1.246428 | 0.331442 |
| CCDC59   | 0.742314 | 0.392949 | 1.402293 | 0.358534 |
| SWAP70   | 0.657699 | 0.373507 | 1.158126 | 0.146658 |
| ARNTL    | 0.58039  | 0.210018 | 1.603922 | 0.294173 |
| LYVE1    | 2.121704 | 0.880019 | 5.115373 | 0.093874 |
| AMPD3    | 0.034111 | 0.001817 | 0.640229 | 0.023943 |
| SBF2     | 19.47218 | 3.942986 | 96.16206 | 0.000269 |
| MICAL2   | 1.750876 | 0.756075 | 4.054583 | 0.1911   |

|           |          |          |          |          |
|-----------|----------|----------|----------|----------|
| RRAS2     | 2.058384 | 0.919692 | 4.606916 | 0.079038 |
| HSD17B4   | 0.573421 | 0.323905 | 1.015146 | 0.056342 |
| ZFC3H1    | 0.605339 | 0.325816 | 1.12467  | 0.112235 |
| RNF122    | 0.653544 | 0.306622 | 1.392981 | 0.270646 |
| DPF2      | 0.67238  | 0.266413 | 1.696974 | 0.400716 |
| MEN1      | 0.962893 | 0.159741 | 5.80415  | 0.967091 |
| NUMB      | 1.089313 | 0.583785 | 2.032602 | 0.788084 |
| COX16     | 0.302581 | 0.057973 | 1.579291 | 0.156213 |
| TTC9      | 0.641687 | 0.133086 | 3.093949 | 0.580428 |
| MED6      | 0.685693 | 0.340517 | 1.380766 | 0.290718 |
| EIF2S1    | 0.443117 | 0.181238 | 1.083396 | 0.074365 |
| ADAM20    | 3.563762 | 0.140896 | 90.14016 | 0.440707 |
| LOXL2     | 0.257874 | 0.023472 | 2.833173 | 0.26772  |
| ELP3      | 0.572899 | 0.275917 | 1.189535 | 0.135082 |
| ADAMDEC   | 1.206343 | 0.55864  | 2.605009 | 0.632936 |
| MBD2      | 4.238095 | 0.300538 | 59.76425 | 0.28481  |
| IER3IP1   | 0.704584 | 0.361482 | 1.373345 | 0.303814 |
| MRPS36    | 0.413158 | 0.161063 | 1.059828 | 0.065905 |
| CCNB1     | 0.648486 | 0.339008 | 1.240484 | 0.190613 |
| CDK7      | 0.773217 | 0.329159 | 1.816338 | 0.555015 |
| CD180     | 5.837082 | 1.916093 | 17.78177 | 0.001908 |
| IRAK2     | 1.110622 | 0.614165 | 2.008388 | 0.728499 |
| CAMK1     | 1.246299 | 0.929227 | 1.671564 | 0.141582 |
| THUMPD3   | 1.143195 | 0.377287 | 3.463921 | 0.812963 |
| VHL       | 0.781878 | 0.306069 | 1.997368 | 0.607112 |
| ARL8B     | 1.082572 | 0.575527 | 2.036329 | 0.805586 |
| EDEM1     | 0.64006  | 0.311909 | 1.313451 | 0.223774 |
| MEIS2     | 1.622873 | 0.092598 | 28.44257 | 0.740347 |
| GNAT2     | 0.400448 | 0.044715 | 3.586236 | 0.413248 |
| GSTM1     | 1.011743 | 0.740424 | 1.382485 | 0.941574 |
| PRPF38B   | 0.290878 | 0.114859 | 0.736645 | 0.009196 |
| TSPAN2    | 1.150822 | 0.634708 | 2.086612 | 0.64359  |
| TSHB      | 0.129345 | 0.006439 | 2.598142 | 0.181487 |
| GSTM5     | 1.966663 | 1.076257 | 3.593716 | 0.027886 |
| GSTM3     | 0.83815  | 0.220737 | 3.182498 | 0.795356 |
| VAV3      | 1.2868   | 0.618076 | 2.679048 | 0.500332 |
| PSRC1     | 2.054993 | 0.923312 | 4.573746 | 0.077647 |
| PTPN22    | 0.38098  | 0.152444 | 0.952124 | 0.038928 |
| SORT1     | 1.27146  | 0.973548 | 1.660535 | 0.077875 |
| WNT2B     | 1.088187 | 0.02857  | 41.44771 | 0.963703 |
| PTGFRN    | 1.289115 | 0.764237 | 2.17448  | 0.34109  |
| NOTCH2    | 1.775478 | 0.353801 | 8.909885 | 0.48548  |
| TRIM45    | 0.888096 | 0.266279 | 2.961977 | 0.846877 |
| CEPT1     | 0.859911 | 0.356206 | 2.075896 | 0.73714  |
| AP4B1     | 0.469018 | 0.237111 | 0.927743 | 0.029595 |
| NAPG      | 0.932338 | 0.215898 | 4.026228 | 0.925216 |
| SPIRE1    | 1.403504 | 1.029565 | 1.913257 | 0.032011 |
| PPHLN1    | 0.335924 | 0.124394 | 0.907158 | 0.031381 |
| FKBP11    | 0.846584 | 0.468208 | 1.53074  | 0.581555 |
| ARF3      | 1.665919 | 0.880989 | 3.150195 | 0.116381 |
| TMEM106   | 0.644786 | 0.371654 | 1.118644 | 0.118496 |
| SLC38A2   | 0.581237 | 0.35413  | 0.953989 | 0.03185  |
| YWHAQ     | 0.349285 | 0.160475 | 0.760244 | 0.008031 |
| KIDINS220 | 1.158721 | 0.564628 | 2.377908 | 0.687954 |
| GRHL1     | 0.24392  | 0.0026   | 22.88526 | 0.542579 |
| ROCK2     | 0.239346 | 0.061359 | 0.933619 | 0.039507 |
| RSAD2     | 0.970101 | 0.583224 | 1.613611 | 0.906921 |
| MYCN      | 0.902225 | 0.705603 | 1.153638 | 0.411989 |



|         |          |          |          |          |
|---------|----------|----------|----------|----------|
| LPIN1   | 0.972793 | 0.633687 | 1.493364 | 0.899623 |
| CMPK2   | 0.941482 | 0.379657 | 2.33471  | 0.89646  |
| IAH1    | 1.301312 | 0.563216 | 3.006688 | 0.53764  |
| LDHA    | 0.457222 | 0.163879 | 1.275647 | 0.134937 |
| IL6ST   | 1.301807 | 0.082751 | 20.47945 | 0.851195 |
| FST     | 0.005048 | 6.00E-05 | 0.424608 | 0.019348 |
| NAV1    | 1.537173 | 0.987735 | 2.39224  | 0.056744 |
| CDC73   | 0.418602 | 0.051134 | 3.42685  | 0.416903 |
| TIMM17A | 0.164126 | 0.012118 | 2.223    | 0.174102 |
| RPS15A  | 1.000559 | 0.385137 | 2.599377 | 0.999085 |
| RBM17   | 0.656702 | 0.289175 | 1.491338 | 0.314947 |
| IL2RA   | 2.41656  | 1.232603 | 4.737747 | 0.010205 |
| ANKRD16 | 0.787914 | 0.237297 | 2.616167 | 0.697054 |
| ECHDC3  | 1.460048 | 0.93456  | 2.28101  | 0.096384 |
| IL15RA  | 1.11225  | 0.155468 | 7.957262 | 0.915609 |
| CCNH    | 0.334782 | 0.13352  | 0.839417 | 0.019638 |
| HRH4    | 0.041613 | 0.001813 | 0.955251 | 0.046745 |
| KCTD1   | 0.995625 | 0.151263 | 6.553278 | 0.996361 |
| CABLES1 | 0.974876 | 0.66     | 1.439972 | 0.898264 |
| DOCK2   | 0.544248 | 0.272352 | 1.087587 | 0.085021 |
| EMP1    | 1.178439 | 0.915634 | 1.516673 | 0.202186 |
| SOX5    | 0.070483 | 0.000674 | 7.366724 | 0.263512 |
| KLRD1   | 0.982646 | 0.522339 | 1.848597 | 0.956699 |
| KLRC1   | 1.060584 | 0.226206 | 4.972621 | 0.940524 |
| PRH2    | 0.125204 | 0.007159 | 2.189836 | 0.154703 |
| LRP4    | 0.978408 | 0.206096 | 4.644844 | 0.978087 |
| MYBPC3  | 0.665971 | 0.169413 | 2.617972 | 0.560548 |
| DDB2    | 0.57799  | 0.241191 | 1.385097 | 0.218925 |
| ACP2    | 1.263547 | 0.800232 | 1.99511  | 0.315509 |
| RAB33A  | 0.630778 | 0.414039 | 0.960975 | 0.03193  |
| RBMX2   | 6.121389 | 1.956757 | 19.14975 | 0.001848 |
| PIWIL4  | 0.551861 | 0.357688 | 0.851443 | 0.007213 |
| PUM1    | 0.505917 | 0.238095 | 1.074999 | 0.076411 |
| PHC2    | 3.289228 | 0.521226 | 20.75688 | 0.205245 |
| CDCA8   | 0.669811 | 0.355128 | 1.263341 | 0.215752 |
| GNL2    | 0.415589 | 0.21338  | 0.809422 | 0.009834 |
| HOOK1   | 1.074243 | 0.425033 | 2.715074 | 0.879672 |
| BTF3L4  | 0.31467  | 0.169251 | 0.585034 | 0.000258 |
| PRPF38A | 0.1089   | 0.029947 | 0.396009 | 0.000762 |
| DSC2    | 1.033471 | 0.765735 | 1.394821 | 0.829605 |
| RNF138  | 0.460757 | 0.245813 | 0.863654 | 0.015639 |
| ELP2    | 0.440004 | 0.233902 | 0.827714 | 0.010882 |
| DSC3    | 0.633259 | 0.041752 | 9.604759 | 0.741915 |
| DTNA    | 2.480953 | 0.791764 | 7.773941 | 0.11893  |
| DAGLA   | 3.479198 | 1.689527 | 7.164621 | 0.000717 |
| SLC43A3 | 0.937886 | 0.236609 | 3.717648 | 0.927285 |
| TIMM10  | 0.645154 | 0.372778 | 1.116547 | 0.117339 |
| DHX34   | 0.719508 | 0.134147 | 3.859156 | 0.700884 |
| APLNR   | 3.492663 | 0.574291 | 21.2413  | 0.174519 |
| FADS2   | 2.254971 | 1.051409 | 4.836264 | 0.036731 |
| TCN1    | 1.039121 | 0.873611 | 1.235987 | 0.664636 |
| TMEM165 | 0.458722 | 0.186081 | 1.130833 | 0.09048  |
| CLOCK   | 0.546415 | 0.22362  | 1.335165 | 0.18489  |
| COL4A2  | 1.418416 | 0.307332 | 6.546348 | 0.654186 |
| CLDN10  | 1.108799 | 0.746735 | 1.646416 | 0.608623 |
| UBAC2   | 0.915452 | 0.34232  | 2.448158 | 0.860285 |
| ARGLU1  | 0.587446 | 0.339275 | 1.017149 | 0.057531 |
| BIVM    | 0.775577 | 0.513198 | 1.1721   | 0.227715 |

|         |          |          |          |          |
|---------|----------|----------|----------|----------|
| ERCC5   | 0.797428 | 0.448412 | 1.418094 | 0.440895 |
| TPP2    | 0.502128 | 0.240201 | 1.049673 | 0.067085 |
| CARS2   | 0.781035 | 0.368675 | 1.654617 | 0.518779 |
| STT3A   | 0.848916 | 0.55455  | 1.299537 | 0.450882 |
| ACRV1   | 0.010405 | 0.000321 | 0.336767 | 0.010069 |
| ETS1    | 1.248551 | 0.824055 | 1.891718 | 0.295044 |
| SLC37A2 | 0.160805 | 0.009832 | 2.630148 | 0.199934 |
| KLB     | 0.957384 | 0.143617 | 6.38215  | 0.964111 |
| TMED7   | 1.00433  | 0.562057 | 1.794619 | 0.988361 |
| APC     | 1.306519 | 0.140032 | 12.19001 | 0.814482 |
| WDR36   | 0.79158  | 0.376986 | 1.662126 | 0.536891 |
| OSTF1   | 0.744553 | 0.436098 | 1.271182 | 0.279792 |
| RFK     | 0.843074 | 0.266624 | 2.665821 | 0.77134  |
| UBQLN1  | 0.416263 | 0.149603 | 1.158233 | 0.093226 |
| ANXA1   | 0.874073 | 0.548201 | 1.393656 | 0.571769 |
| AGTPBP1 | 0.609831 | 0.366247 | 1.015416 | 0.057282 |
| GOLM1   | 1.750848 | 0.604728 | 5.069167 | 0.301772 |
| PSAT1   | 0.960307 | 0.290366 | 3.175955 | 0.947085 |
| ISCA1   | 1.163844 | 0.680793 | 1.98964  | 0.579178 |
| ADAM19  | 2.296815 | 0.65042  | 8.110691 | 0.196442 |
| HAVCR2  | 1.085025 | 0.852682 | 1.380679 | 0.506867 |
| CCNJL   | 1.48293  | 0.405796 | 5.419176 | 0.55123  |
| TAOK3   | 1.744081 | 0.356351 | 8.53602  | 0.492407 |
| USP30   | 0.52635  | 0.200041 | 1.384933 | 0.193526 |
| SDS     | 5.053702 | 0.549327 | 46.49305 | 0.152465 |
| HNF1A   | 0.051598 | 0.005073 | 0.524821 | 0.012255 |
| FBXO21  | 4.132242 | 1.572542 | 10.85848 | 0.003998 |
| OASL    | 3.006441 | 1.546269 | 5.845483 | 0.001176 |
| HRK     | 1.569567 | 0.635648 | 3.875642 | 0.328333 |
| RNFT2   | 0.521487 | 0.15797  | 1.721515 | 0.285298 |
| P2RX4   | 1.267574 | 0.667115 | 2.408497 | 0.469082 |
| DTX1    | 2.35674  | 0.949675 | 5.848553 | 0.064513 |
| TRAFD1  | 2.067569 | 0.752829 | 5.678368 | 0.158787 |
| DMTF1   | 0.525742 | 0.287024 | 0.963001 | 0.037338 |
| CCDC146 | 0.469762 | 0.122998 | 1.794152 | 0.269146 |
| TMEM60  | 1.81406  | 0.90544  | 3.634494 | 0.092998 |
| CD36    | 1.026047 | 0.779855 | 1.34996  | 0.854256 |
| UGT2B28 | 0.25684  | 0.059444 | 1.109729 | 0.06868  |
| PNPLA8  | 1.44067  | 0.754896 | 2.749424 | 0.268184 |
| RINT1   | 0.960007 | 0.245918 | 3.747651 | 0.953163 |
| SRPK2   | 0.420169 | 0.073582 | 2.399248 | 0.329337 |
| TES     | 0.377972 | 0.092132 | 1.55063  | 0.176729 |
| MDFIC   | 1.120184 | 0.632664 | 1.983377 | 0.697013 |
| MTO1    | 0.580616 | 0.149026 | 2.262125 | 0.433322 |
| ANKRD6  | 1.553617 | 0.490326 | 4.922699 | 0.453997 |
| KHDC1   | 2.920547 | 1.055759 | 8.079108 | 0.038972 |
| SYNCRIP | 0.452731 | 0.234124 | 0.875455 | 0.018508 |
| SNX14   | 0.99146  | 0.346441 | 2.8374   | 0.987244 |
| NT5E    | 0.807385 | 0.380836 | 1.711683 | 0.576803 |
| AKIRIN2 | 1.758046 | 0.937704 | 3.296059 | 0.078512 |
| LCA5    | 0.132534 | 0.012149 | 1.445754 | 0.097397 |
| MAP3K7  | 0.35467  | 0.135614 | 0.927562 | 0.034578 |
| CGA     | 4.083327 | 0.774649 | 21.52402 | 0.097139 |
| LMO2    | 1.077865 | 0.649747 | 1.788069 | 0.771547 |
| PHF21A  | 1.000957 | 0.465545 | 2.152131 | 0.998046 |
| NAT10   | 0.554286 | 0.31487  | 0.975747 | 0.040849 |
| PRRG4   | 2.034831 | 0.766418 | 5.40245  | 0.153874 |
| CAPRIN1 | 0.468885 | 0.180778 | 1.216152 | 0.119343 |

|           |          |          |          |          |
|-----------|----------|----------|----------|----------|
| DNAJC14   | 0.913964 | 0.336906 | 2.479413 | 0.859758 |
| CD63      | 0.975788 | 0.53826  | 1.768963 | 0.93564  |
| AVIL      | 1.000598 | 0.105237 | 9.51371  | 0.999585 |
| GDF11     | 0.393306 | 0.181027 | 0.854509 | 0.018418 |
| GLS2      | 4.58844  | 0.445748 | 47.23245 | 0.200287 |
| ITGA7     | 1.658698 | 0.289438 | 9.505581 | 0.56997  |
| FAM186B   | 0.230705 | 0.024696 | 2.155239 | 0.198299 |
| RDH5      | 0.416095 | 0.194817 | 0.888704 | 0.02353  |
| AGAP2     | 2.462897 | 0.524747 | 11.5596  | 0.253224 |
| BLOC1S1   | 1.553781 | 0.894223 | 2.699813 | 0.11797  |
| CDK4      | 0.447668 | 0.242347 | 0.826939 | 0.010262 |
| PPP1R1A   | 8.460495 | 0.499619 | 143.2692 | 0.139068 |
| TROAP     | 0.73614  | 0.459292 | 1.179864 | 0.203102 |
| TSPAN31   | 0.826592 | 0.342515 | 1.994811 | 0.671795 |
| TFCP2     | 0.446467 | 0.206522 | 0.965188 | 0.04036  |
| COQ10A    | 0.91696  | 0.617427 | 1.361806 | 0.667479 |
| PAN2      | 0.328384 | 0.147633 | 0.730434 | 0.006332 |
| ESPL1     | 0.76451  | 0.363493 | 1.60794  | 0.47902  |
| ZC3H10    | 2.23027  | 1.272024 | 3.910384 | 0.005113 |
| HNRNPA1   | 0.331153 | 0.159551 | 0.687318 | 0.003013 |
| ACVR1B    | 0.652548 | 0.166098 | 2.563655 | 0.540901 |
| OS9       | 3.051691 | 1.131595 | 8.229812 | 0.02751  |
| KCNH3     | 1.122441 | 0.611302 | 2.060965 | 0.709484 |
| LTV1      | 0.422192 | 0.196304 | 0.908012 | 0.027318 |
| MAP7      | 1.024119 | 0.700858 | 1.49648  | 0.901982 |
| CD164     | 1.222032 | 0.812556 | 1.837858 | 0.335528 |
| AHI1      | 0.46264  | 0.256685 | 0.833846 | 0.010332 |
| HEY2      | 0.225734 | 0.019003 | 2.681497 | 0.238487 |
| PKIB      | 1.038849 | 0.430553 | 2.506558 | 0.932412 |
| SMPD2     | 1.307686 | 0.56596  | 3.021492 | 0.530134 |
| MICAL1    | 0.885184 | 0.639381 | 1.225483 | 0.462441 |
| REPS1     | 0.102832 | 0.018736 | 0.564388 | 0.008834 |
| STX11     | 1.131522 | 0.881231 | 1.452902 | 0.332681 |
| TEC       | 0.465464 | 0.198795 | 1.089852 | 0.078113 |
| SEMA4F    | 1.889945 | 0.654944 | 5.45373  | 0.239089 |
| CCT7      | 0.65337  | 0.31086  | 1.373261 | 0.261426 |
| EGR4      | 0.539563 | 0.080912 | 3.598057 | 0.523901 |
| RAB11FIP5 | 1.349888 | 0.89463  | 2.036819 | 0.152873 |
| SMYD5     | 1.622533 | 0.331688 | 7.937029 | 0.550157 |
| DYSF      | 1.063003 | 0.854953 | 1.32168  | 0.582457 |
| CCDC142   | 1.726384 | 0.442552 | 6.734581 | 0.43175  |
| EMX1      | 2.436154 | 0.079491 | 74.66023 | 0.610112 |
| KCNMB4    | 0.957184 | 0.566741 | 1.616616 | 0.870008 |
| USP15     | 1.273359 | 0.608554 | 2.66442  | 0.521195 |
| GNS       | 1.24851  | 0.828121 | 1.882306 | 0.289327 |
| CPM       | 1.271918 | 0.152331 | 10.62012 | 0.824208 |
| MDM2      | 1.252242 | 0.028839 | 54.37422 | 0.906931 |
| KLHL36    | 1.028293 | 0.550569 | 1.920532 | 0.930247 |
| MPHOSP1   | 0.610803 | 0.226884 | 1.644363 | 0.329235 |
| KIAA0513  | 1.243599 | 0.783552 | 1.973752 | 0.354957 |
| DYNC1LI2  | 0.957961 | 0.510249 | 1.798514 | 0.893693 |
| FBXL8     | 1.822293 | 0.793865 | 4.183017 | 0.156931 |
| FHOD1     | 1.215142 | 0.611493 | 2.414694 | 0.578103 |
| CCDC102   | 1.060868 | 0.707105 | 1.59162  | 0.775275 |
| SLC9A5    | 0.419296 | 0.031635 | 5.557353 | 0.509771 |
| AGT       | 2.185404 | 0.735749 | 6.491329 | 0.159278 |
| KCNK1     | 1.111992 | 0.170515 | 7.251727 | 0.91165  |
| URB2      | 0.702982 | 0.247955 | 1.993037 | 0.507431 |

|          |          |          |          |          |
|----------|----------|----------|----------|----------|
| EGLN1    | 0.829918 | 0.447366 | 1.539601 | 0.554322 |
| COG2     | 0.788576 | 0.230818 | 2.694127 | 0.704746 |
| ABCB10   | 0.554026 | 0.322223 | 0.952586 | 0.03271  |
| TAF5L    | 0.279058 | 0.047233 | 1.648687 | 0.159044 |
| GLUL     | 0.871772 | 0.111167 | 6.836449 | 0.896096 |
| STX6     | 0.716211 | 0.332366 | 1.543355 | 0.394154 |
| RNASEL   | 1.120629 | 0.519362 | 2.417983 | 0.77162  |
| DHX9     | 0.144094 | 0.026672 | 0.778455 | 0.024388 |
| KIAA1614 | 2.067193 | 0.160228 | 26.67008 | 0.577831 |
| CEP350   | 0.78165  | 0.403933 | 1.512567 | 0.464539 |
| NPL      | 1.033009 | 0.747912 | 1.426782 | 0.843751 |
| PIGC     | 0.668453 | 0.291406 | 1.533359 | 0.341675 |
| LAMC1    | 1.269225 | 1.010478 | 1.594229 | 0.040406 |
| RC3H1    | 0.177659 | 0.01736  | 1.818156 | 0.145349 |
| GPR55    | 2.578734 | 0.722076 | 9.209375 | 0.144678 |
| SP110    | 0.919894 | 0.444267 | 1.904723 | 0.822099 |
| MRPL44   | 1.594504 | 0.276926 | 9.180943 | 0.601412 |
| CHRND    | 0.239287 | 0.016615 | 3.4462   | 0.29334  |
| DOCK10   | 1.043238 | 0.74132  | 1.46812  | 0.808136 |
| TTLL4    | 2.830442 | 1.097887 | 7.297108 | 0.0313   |
| USP37    | 0.266715 | 0.078748 | 0.903346 | 0.033731 |
| HTR2B    | 0.055115 | 0.004026 | 0.754457 | 0.02993  |
| ITM2C    | 0.962111 | 0.707101 | 1.309089 | 0.805815 |
| SERPINE2 | 1.174642 | 0.894608 | 1.542334 | 0.246684 |
| DNAJB2   | 2.725105 | 1.13656  | 6.533923 | 0.024649 |
| WNT10A   | 0.406269 | 0.053442 | 3.088505 | 0.384116 |
| TMBIM1   | 1.933129 | 0.918124 | 4.070244 | 0.082723 |
| CYP27A1  | 1.114033 | 0.900274 | 1.378548 | 0.320484 |
| EIF4E2   | 1.428192 | 0.664604 | 3.069095 | 0.361154 |
| ARMC9    | 0.24624  | 0.029139 | 2.080836 | 0.198086 |
| CAB39    | 0.756021 | 0.421153 | 1.35715  | 0.348793 |
| COX5B    | 2.45169  | 1.098305 | 5.47278  | 0.028609 |
| REV1     | 0.206527 | 0.074793 | 0.570286 | 0.002337 |
| TSGA10   | 0.050978 | 0.009776 | 0.265819 | 0.000412 |
| MFS9     | 0.343928 | 0.053283 | 2.219976 | 0.261957 |
| TMEM127  | 1.937972 | 0.87196  | 4.307237 | 0.104435 |
| EDAR     | 0.220156 | 0.020299 | 2.387686 | 0.213365 |
| TGFBRAP1 | 1.051581 | 0.670019 | 1.650436 | 0.826887 |
| GCC2     | 3.119908 | 0.259455 | 37.51649 | 0.369883 |
| MRPS9    | 0.593812 | 0.259974 | 1.356341 | 0.216187 |
| ANKRD36  | 0.333841 | 0.082026 | 1.358706 | 0.125539 |
| EPC2     | 1.702335 | 0.334454 | 8.664686 | 0.52167  |
| ARHGEF4  | 1.959243 | 0.047658 | 80.54556 | 0.722808 |
| ISCU     | 0.896911 | 0.407123 | 1.975939 | 0.787176 |
| ALDH1L2  | 1.285756 | 0.048669 | 33.96746 | 0.880398 |
| STAB2    | 1.887601 | 0.277351 | 12.84667 | 0.516156 |
| USP44    | 1.093334 | 0.642551 | 1.860367 | 0.742135 |
| SCYL2    | 0.648337 | 0.330728 | 1.270954 | 0.207017 |
| CKAP4    | 1.057744 | 0.843618 | 1.326218 | 0.626658 |
| PLXNC1   | 1.011896 | 0.481045 | 2.128563 | 0.975135 |
| APPL2    | 0.95104  | 0.457113 | 1.978672 | 0.893168 |
| PWP1     | 0.776493 | 0.336791 | 1.790253 | 0.552812 |
| DRAM1    | 1.272599 | 0.870415 | 1.860614 | 0.213555 |
| SLC41A2  | 0.727214 | 0.128318 | 4.121338 | 0.718925 |
| VILL     | 0.631947 | 0.238711 | 1.672971 | 0.355506 |
| FLNB     | 1.171606 | 0.83251  | 1.648822 | 0.363631 |
| NEK3     | 0.80726  | 0.068841 | 9.466269 | 0.864648 |
| VPS36    | 0.586662 | 0.333117 | 1.033188 | 0.064762 |

|          |          |          |          |          |
|----------|----------|----------|----------|----------|
| RNASEH2E | 0.926912 | 0.573059 | 1.499261 | 0.757058 |
| CKAP2    | 0.508249 | 0.240074 | 1.075989 | 0.076965 |
| TBC1D4   | 1.339264 | 0.572274 | 3.134212 | 0.500706 |
| THSD1    | 0.228917 | 0.001155 | 45.38396 | 0.584849 |
| LRCH1    | 8.684563 | 0.273032 | 276.2371 | 0.220749 |
| SUCLA2   | 0.63712  | 0.273674 | 1.483229 | 0.295749 |
| RCBTB1   | 0.486583 | 0.159768 | 1.48192  | 0.204894 |
| MED4     | 0.308945 | 0.099686 | 0.957483 | 0.041826 |
| PHF11    | 1.453341 | 0.479589 | 4.404184 | 0.50866  |
| COG3     | 0.534919 | 0.171877 | 1.664787 | 0.280116 |
| LMO7     | 0.232789 | 0.019416 | 2.790984 | 0.250099 |
| ITM2B    | 1.881212 | 0.595533 | 5.942512 | 0.281577 |
| SPRY2    | 0.842815 | 0.623798 | 1.13873  | 0.265361 |
| NUDT15   | 0.690519 | 0.240444 | 1.983064 | 0.491459 |
| EDNRB    | 1.154482 | 0.0088   | 151.466  | 0.95396  |
| RCBTB2   | 1.451013 | 0.836274 | 2.517641 | 0.185494 |
| LCP1     | 0.899802 | 0.494284 | 1.638013 | 0.729772 |
| SETDB2   | 0.510657 | 0.25694  | 1.01491  | 0.055145 |
| SCRN1    | 1.22857  | 0.981885 | 1.53723  | 0.071845 |
| TNS3     | 1.651618 | 1.235688 | 2.207549 | 0.0007   |
| SPDYE1   | 1.164277 | 0.27906  | 4.85752  | 0.834683 |
| CHST12   | 0.776652 | 0.540631 | 1.115713 | 0.171451 |
| IGF2BP3  | 1.045383 | 0.587731 | 1.859395 | 0.879931 |
| GPNMB    | 2.079526 | 1.04756  | 4.128097 | 0.036369 |
| RAPGEF5  | 1.897369 | 0.140451 | 25.63179 | 0.629677 |
| RAC1     | 8.333495 | 1.635202 | 42.47007 | 0.010716 |
| KDEL2    | 0.977834 | 0.444295 | 2.152084 | 0.955587 |
| IL6      | 1.408752 | 0.827365 | 2.398679 | 0.206926 |
| ZDHHC4   | 0.270037 | 0.055647 | 1.3104   | 0.104265 |
| AOAH     | 1.102942 | 0.767613 | 1.584759 | 0.596226 |
| BZW2     | 0.513239 | 0.306481 | 0.859481 | 0.011225 |
| TBRG4    | 1.314962 | 0.603341 | 2.865917 | 0.490931 |
| DDX56    | 1.134367 | 0.502825 | 2.559118 | 0.761343 |
| HUS1     | 0.007525 | 0.000243 | 0.233156 | 0.005252 |
| NACAD    | 1.959609 | 0.164317 | 23.36982 | 0.594758 |
| DBNL     | 1.495993 | 0.733825 | 3.049768 | 0.267708 |
| CCM2     | 1.526793 | 0.644156 | 3.618842 | 0.336512 |
| MYO1G    | 1.462821 | 0.92628  | 2.310152 | 0.102786 |
| TTYH3    | 1.973259 | 1.2492   | 3.116996 | 0.00357  |
| TTC5     | 0.910308 | 0.427233 | 1.939597 | 0.807632 |
| ZFH2     | 1.633146 | 0.393866 | 6.771757 | 0.499069 |
| MTHFS    | 0.668304 | 0.2949   | 1.51451  | 0.334288 |
| ADAMTS7  | 2.691805 | 0.148792 | 48.69756 | 0.50267  |
| IREB2    | 0.444484 | 0.20505  | 0.963504 | 0.039961 |
| ALPK3    | 0.940888 | 0.094766 | 9.341648 | 0.958507 |
| TM6SF1   | 1.081485 | 0.729067 | 1.604256 | 0.697009 |
| CIB2     | 2.047751 | 1.234674 | 3.396268 | 0.005493 |
| CALCOCO  | 0.727373 | 0.41734  | 1.267722 | 0.261423 |
| RSAD1    | 0.294176 | 0.109957 | 0.787026 | 0.014812 |
| NMT1     | 0.748597 | 0.339422 | 1.651033 | 0.473061 |
| MYCBPAP  | 1.183754 | 0.198796 | 7.048792 | 0.852984 |
| VEZF1    | 0.887754 | 0.521657 | 1.510779 | 0.660738 |
| CHAD     | 0.13148  | 0.019262 | 0.897454 | 0.038418 |
| TACO1    | 1.797    | 0.702763 | 4.595016 | 0.221107 |
| TEX2     | 0.748499 | 0.415007 | 1.34998  | 0.335701 |
| DCAF7    | 1.063621 | 0.600687 | 1.883325 | 0.832435 |
| LIMD2    | 1.57714  | 0.283626 | 8.769885 | 0.602732 |
| BRIP1    | 0.509378 | 0.135626 | 1.9131   | 0.317737 |

|          |          |          |          |          |
|----------|----------|----------|----------|----------|
| RTP4     | 1.185325 | 0.647283 | 2.170605 | 0.581772 |
| ACTL6A   | 0.906992 | 0.513823 | 1.601009 | 0.736339 |
| NDUFB5   | 0.60456  | 0.247568 | 1.476336 | 0.269258 |
| MRPL47   | 0.86431  | 0.424314 | 1.760561 | 0.687887 |
| ERMN     | 0.075641 | 0.002655 | 2.154716 | 0.130851 |
| GALNT5   | 3.509951 | 0.367317 | 33.53983 | 0.275584 |
| TANK     | 2.131424 | 0.791161 | 5.742157 | 0.134475 |
| BLK      | 1.160878 | 0.635193 | 2.121621 | 0.627765 |
| SKIL     | 3.395398 | 0.158177 | 72.88492 | 0.434612 |
| HLX      | 1.814984 | 1.223124 | 2.69324  | 0.003075 |
| VPS45    | 0.888523 | 0.415972 | 1.897898 | 0.760185 |
| IL10     | 0.866305 | 0.202486 | 3.706355 | 0.846554 |
| KCTD3    | 0.830592 | 0.403852 | 1.708257 | 0.613899 |
| RPS6KC1  | 1.012316 | 0.463717 | 2.209933 | 0.975485 |
| CBWD2    | 3.019732 | 0.184461 | 49.43474 | 0.438427 |
| IL1RN    | 1.438575 | 0.945136 | 2.189629 | 0.089754 |
| SMPD4    | 0.319935 | 0.088659 | 1.154519 | 0.081767 |
| WDR33    | 0.461607 | 0.118794 | 1.793706 | 0.264309 |
| CCDC115  | 0.94119  | 0.363505 | 2.436938 | 0.900627 |
| SAP130   | 0.73896  | 0.297882 | 1.83315  | 0.514019 |
| BIN1     | 1.427744 | 1.024669 | 1.989376 | 0.035383 |
| IMP4     | 0.953894 | 0.436372 | 2.08518  | 0.905831 |
| HS6ST1   | 1.31124  | 0.340674 | 5.046913 | 0.693546 |
| GYPC     | 0.867162 | 0.608207 | 1.23637  | 0.430957 |
| STAM     | 0.476187 | 0.275613 | 0.822726 | 0.007828 |
| ABI1     | 0.36706  | 0.06489  | 2.076319 | 0.256962 |
| YME1L1   | 0.715426 | 0.311637 | 1.642408 | 0.429651 |
| DNAJC1   | 1.436134 | 0.79465  | 2.595458 | 0.230634 |
| NIPSNAP3 | 0.972108 | 0.456232 | 2.071302 | 0.941573 |
| LRRRC8A  | 1.475681 | 0.706786 | 3.08104  | 0.300195 |
| CDK9     | 0.7114   | 0.29556  | 1.712308 | 0.447355 |
| TXN      | 0.775806 | 0.433262 | 1.389171 | 0.393071 |
| ODF2     | 0.247798 | 0.049482 | 1.240926 | 0.089631 |
| TOR1B    | 2.340924 | 0.732353 | 7.482623 | 0.151406 |
| SMC2     | 0.363043 | 0.124938 | 1.054922 | 0.062642 |
| KLF4     | 1.296729 | 1.034678 | 1.625149 | 0.024075 |
| TOR1A    | 0.666406 | 0.279725 | 1.587617 | 0.35949  |
| RALGPS1  | 0.695841 | 0.163498 | 2.961485 | 0.623611 |
| ST6GALNA | 1.718513 | 1.120677 | 2.635271 | 0.013054 |
| TMOD1    | 0.831548 | 0.598988 | 1.154401 | 0.270411 |
| DAB2IP   | 0.008315 | 0.000104 | 0.661898 | 0.031974 |
| STXBP1   | 0.889357 | 0.072068 | 10.97516 | 0.92713  |
| SLC2A8   | 1.284984 | 0.871576 | 1.894481 | 0.205518 |
| ANGPTL2  | 0.20191  | 0.024891 | 1.637843 | 0.13413  |
| CDK5RAP2 | 0.330215 | 0.130941 | 0.832753 | 0.018887 |
| SLC31A2  | 1.149248 | 0.760709 | 1.736238 | 0.508753 |
| SLC31A1  | 1.440921 | 0.782271 | 2.654134 | 0.241171 |
| TLR4     | 1.448326 | 1.061713 | 1.975721 | 0.019391 |
| ZNF189   | 1.265978 | 0.316733 | 5.060106 | 0.738665 |
| STX17    | 0.827129 | 0.132683 | 5.156225 | 0.838921 |
| PRPF4    | 0.633331 | 0.286314 | 1.40094  | 0.259473 |
| FPGS     | 0.49549  | 0.069115 | 3.55219  | 0.484733 |
| USP20    | 1.004422 | 0.135337 | 7.454449 | 0.996558 |
| ATP6V1G1 | 0.22584  | 0.070007 | 0.728555 | 0.012777 |
| TEX10    | 0.475677 | 0.243248 | 0.930198 | 0.029899 |
| GARNL3   | 1.983122 | 0.394023 | 9.981084 | 0.406316 |
| MRPL50   | 2.119234 | 1.087357 | 4.130339 | 0.027388 |
| DPM2     | 1.067979 | 0.517762 | 2.202905 | 0.85869  |

|          |          |          |          |          |
|----------|----------|----------|----------|----------|
| WDR38    | 1.33184  | 0.013772 | 128.7966 | 0.902222 |
| TSTD2    | 0.554256 | 0.123844 | 2.480536 | 0.440229 |
| HEMGN    | 1.069684 | 0.754553 | 1.516426 | 0.705195 |
| PSMB7    | 0.515037 | 0.276032 | 0.960987 | 0.037068 |
| NR5A1    | 1.499234 | 0.43525  | 5.164164 | 0.521042 |
| RABEPK   | 0.673618 | 0.311166 | 1.458261 | 0.316041 |
| GOLGA1   | 0.597361 | 0.220593 | 1.617642 | 0.310731 |
| XPA      | 1.211    | 0.373559 | 3.925802 | 0.749698 |
| NCBP1    | 0.503213 | 0.15753  | 1.60746  | 0.246481 |
| ANP32B   | 0.643921 | 0.259078 | 1.600421 | 0.343335 |
| PDCL     | 0.619323 | 0.207703 | 1.846677 | 0.390036 |
| RPL35    | 0.909382 | 0.28955  | 2.856074 | 0.870771 |
| LMX1B    | 2.110209 | 0.286937 | 15.51901 | 0.463211 |
| ARPC5L   | 1.442622 | 0.590508 | 3.524351 | 0.421337 |
| ENPP2    | 1.355208 | 0.842165 | 2.180795 | 0.210477 |
| DSCC1    | 0.23956  | 0.087313 | 0.65728  | 0.005522 |
| DERL1    | 1.030109 | 0.542423 | 1.956268 | 0.927769 |
| MYC      | 1.003849 | 0.723063 | 1.393673 | 0.981691 |
| RANBP6   | 0.736649 | 0.255856 | 2.120926 | 0.571067 |
| POLR1E   | 0.460117 | 0.233081 | 0.908304 | 0.025278 |
| PLAA     | 0.392385 | 0.052734 | 2.919688 | 0.360931 |
| IL11RA   | 0.508049 | 0.171609 | 1.504078 | 0.221382 |
| UBAP2    | 0.603973 | 0.26088  | 1.398283 | 0.239097 |
| APTX     | 0.466482 | 0.11413  | 1.906652 | 0.288439 |
| RNF38    | 0.478248 | 0.153325 | 1.491742 | 0.20377  |
| TLN1     | 1.29606  | 0.725968 | 2.313839 | 0.3805   |
| SIT1     | 1.845912 | 0.538515 | 6.327377 | 0.329443 |
| DNAJB5   | 8.617695 | 0.058447 | 1270.624 | 0.397894 |
| SPAG8    | 0.10241  | 0.003851 | 2.723716 | 0.1734   |
| DCTN3    | 1.56278  | 0.284276 | 8.591222 | 0.607637 |
| CD72     | 1.370266 | 0.635983 | 2.952329 | 0.421203 |
| TMEM8B   | 4.60879  | 0.903392 | 23.51243 | 0.066097 |
| GRHPR    | 1.488822 | 0.709566 | 3.123867 | 0.292544 |
| ALDH1B1  | 1.009675 | 0.435425 | 2.34126  | 0.982099 |
| DENND4C  | 0.472741 | 0.233736 | 0.956137 | 0.03709  |
| RPS6     | 0.825743 | 0.204782 | 3.329647 | 0.787819 |
| CNPY3    | 1.440642 | 0.657043 | 3.158772 | 0.362067 |
| FOXP4    | 1.051208 | 0.153444 | 7.201569 | 0.959434 |
| PPIL1    | 0.642076 | 0.326132 | 1.264097 | 0.199882 |
| KLC4     | 0.029188 | 0.001325 | 0.643004 | 0.0251   |
| KIF13A   | 0.257289 | 0.034996 | 1.891564 | 0.182289 |
| PIM1     | 1.466891 | 1.025207 | 2.098864 | 0.036068 |
| GMPR     | 0.977066 | 0.712845 | 1.339223 | 0.885324 |
| YIPF3    | 1.667747 | 0.485955 | 5.723541 | 0.416242 |
| TMEM14B  | 0.689151 | 0.320892 | 1.480028 | 0.33976  |
| TMEM63B  | 1.495411 | 0.767079 | 2.915286 | 0.237427 |
| FRS3     | 1.333191 | 0.597941 | 2.972535 | 0.482099 |
| TJAP1    | 0.795518 | 0.280666 | 2.254814 | 0.666932 |
| CAPN11   | 1.450876 | 0.973958 | 2.161326 | 0.06722  |
| IRF4     | 2.016197 | 1.151849 | 3.529153 | 0.014093 |
| SLC22A23 | 1.693198 | 0.619331 | 4.629056 | 0.304765 |
| TUBB2A   | 1.136961 | 0.823082 | 1.570536 | 0.436133 |
| LRRC1    | 1.285472 | 0.168827 | 9.787766 | 0.808423 |
| GCM1     | 0.839918 | 0.109381 | 6.449574 | 0.866793 |
| BPHL     | 0.477567 | 0.192467 | 1.184982 | 0.110956 |
| RIPK1    | 0.920852 | 0.390845 | 2.169573 | 0.850421 |
| TUBB2B   | 0.30104  | 0.045448 | 1.994037 | 0.213312 |
| HMGAI    | 2.560686 | 0.511733 | 12.81354 | 0.252416 |

|          |          |          |          |          |
|----------|----------|----------|----------|----------|
| TCF19    | 0.28973  | 0.045554 | 1.842743 | 0.189386 |
| FLOT1    | 1.221567 | 0.753113 | 1.98141  | 0.417369 |
| IER3     | 1.213443 | 0.993522 | 1.482045 | 0.057925 |
| MDC1     | 0.393828 | 0.180145 | 0.860979 | 0.019541 |
| PGBD1    | 0.378347 | 0.179196 | 0.798824 | 0.010802 |
| TPMT     | 0.683419 | 0.336726 | 1.387067 | 0.291888 |
| RNF144B  | 1.001241 | 0.693951 | 1.444602 | 0.994711 |
| NRM      | 1.265276 | 0.564701 | 2.834991 | 0.567574 |
| MTCH1    | 2.471616 | 0.909833 | 6.714292 | 0.075957 |
| VARS2    | 0.351017 | 0.142721 | 0.86331  | 0.022603 |
| TAF8     | 0.391849 | 0.145264 | 1.05701  | 0.064248 |
| FAM8A1   | 0.322447 | 0.133944 | 0.776239 | 0.011568 |
| FGFBP2   | 0.979427 | 0.750081 | 1.278899 | 0.878622 |
| CPEB2    | 1.094586 | 0.250363 | 4.785524 | 0.904425 |
| FHDC1    | 0.984303 | 0.646236 | 1.499223 | 0.94125  |
| TLR2     | 1.891208 | 0.76567  | 4.671293 | 0.167213 |
| MYO7A    | 1.620607 | 0.99349  | 2.643578 | 0.053137 |
| FCHSD2   | 0.422223 | 0.190208 | 0.937246 | 0.034069 |
| ARRB1    | 2.690071 | 1.33251  | 5.430714 | 0.005765 |
| SLCO2B1  | 2.256938 | 0.962072 | 5.294584 | 0.061333 |
| ANKRD42  | 1.168934 | 0.084413 | 16.18715 | 0.907329 |
| IL18BP   | 1.166816 | 0.222279 | 6.125005 | 0.855296 |
| NUMA1    | 2.331211 | 0.882356 | 6.159135 | 0.087735 |
| CCDC90B  | 0.802627 | 0.33368  | 1.93062  | 0.623447 |
| SYTL2    | 1.34644  | 0.231411 | 7.834114 | 0.740593 |
| RAB30    | 1.274716 | 0.407171 | 3.990707 | 0.676787 |
| CREBZF   | 0.606768 | 0.34145  | 1.078249 | 0.088542 |
| LRRC32   | 1.753905 | 1.064855 | 2.888827 | 0.027329 |
| PRCP     | 1.316763 | 0.728573 | 2.379809 | 0.362148 |
| NARS2    | 0.357197 | 0.164739 | 0.774494 | 0.00913  |
| RNF121   | 0.457393 | 0.144907 | 1.443744 | 0.182278 |
| MRPL15   | 1.08333  | 0.555968 | 2.110922 | 0.814081 |
| PI15     | 0.744037 | 0.369567 | 1.497946 | 0.407597 |
| GGH      | 0.628656 | 0.365571 | 1.081074 | 0.093321 |
| SLCO5A1  | 1.255555 | 0.470217 | 3.352538 | 0.649717 |
| TGS1     | 0.222    | 0.019216 | 2.564726 | 0.227991 |
| SDCBP    | 1.195167 | 0.768184 | 1.859482 | 0.429204 |
| NEK1     | 0.473275 | 0.219847 | 1.01884  | 0.055844 |
| DDX60    | 1.067325 | 0.587254 | 1.939846 | 0.830747 |
| SORL1    | 0.868107 | 0.632956 | 1.190619 | 0.380208 |
| BUD13    | 0.83825  | 0.237197 | 2.962367 | 0.78414  |
| TRPC6    | 0.866446 | 0.06567  | 11.43177 | 0.91327  |
| MMP7     | 1.005315 | 0.647177 | 1.561643 | 0.981179 |
| DCUN1D5  | 0.524125 | 0.201087 | 1.366114 | 0.186267 |
| SLC37A4  | 0.515019 | 0.291874 | 0.908766 | 0.022013 |
| RDX      | 1.060498 | 0.546252 | 2.058859 | 0.862231 |
| PPP2R1B  | 0.278624 | 0.031936 | 2.430881 | 0.247576 |
| FDX1     | 0.708155 | 0.263204 | 1.905304 | 0.494364 |
| FXVD6    | 1.311019 | 0.857818 | 2.003654 | 0.21082  |
| TMPRSS13 | 1.131326 | 0.174766 | 7.323509 | 0.896973 |
| CASP1    | 1.616027 | 0.979797 | 2.665392 | 0.060106 |
| CASP5    | 1.379416 | 0.744542 | 2.555652 | 0.306605 |
| ALKBH8   | 0.679728 | 0.228951 | 2.018033 | 0.486836 |
| MAP2K5   | 1.924056 | 0.463565 | 7.985921 | 0.367467 |
| CTDSPL2  | 0.893881 | 0.422679 | 1.890375 | 0.769083 |
| SLTM     | 0.342302 | 0.167713 | 0.698637 | 0.003228 |
| THBS1    | 1.461141 | 1.074024 | 1.987787 | 0.015749 |
| MAPKBP1  | 2.545724 | 1.385811 | 4.676474 | 0.002599 |



|          |          |          |          |          |
|----------|----------|----------|----------|----------|
| NUSAP1   | 0.718686 | 0.464511 | 1.111943 | 0.137955 |
| NDUFAF1  | 0.809167 | 0.409711 | 1.598082 | 0.541975 |
| KIF23    | 0.5288   | 0.191841 | 1.457612 | 0.218096 |
| ITGA11   | 0.269699 | 0.01504  | 4.836116 | 0.373578 |
| RTF1     | 0.658454 | 0.21095  | 2.055278 | 0.47183  |
| PARP6    | 0.397999 | 0.066298 | 2.389262 | 0.313696 |
| RPLP1    | 1.530066 | 0.402978 | 5.809499 | 0.532105 |
| PAQR5    | 0.283323 | 0.01135  | 7.07211  | 0.442314 |
| TUBGCP4  | 0.375159 | 0.161358 | 0.87225  | 0.022758 |
| ITPKA    | 0.756542 | 0.462058 | 1.23871  | 0.267419 |
| UACA     | 0.129163 | 0.005731 | 2.911261 | 0.197863 |
| SMAD6    | 3.13754  | 1.560749 | 6.307329 | 0.00133  |
| PLCB2    | 1.393383 | 0.80806  | 2.40269  | 0.232742 |
| TMEM62   | 1.044345 | 0.367837 | 2.965053 | 0.935046 |
| PAK6     | 0.655103 | 0.29283  | 1.465561 | 0.303223 |
| ADAM10   | 1.016771 | 0.529921 | 1.950898 | 0.960105 |
| DUOX1    | 0.149686 | 0.004071 | 5.503794 | 0.301761 |
| ZNF280D  | 0.661801 | 0.316948 | 1.381869 | 0.271804 |
| BCL2L10  | 0.351167 | 0.088344 | 1.395878 | 0.137205 |
| RSL24D1  | 0.700783 | 0.35358  | 1.388928 | 0.308347 |
| SPTBN5   | 0.448308 | 0.0521   | 3.857611 | 0.46504  |
| GCHFR    | 0.921826 | 0.64142  | 1.324816 | 0.660012 |
| BCAR3    | 1.391462 | 0.359492 | 5.385848 | 0.632361 |
| TTLL7    | 0.705767 | 0.192328 | 2.589885 | 0.599346 |
| FNBP1L   | 1.062563 | 0.57144  | 1.975779 | 0.847938 |
| GTF2B    | 0.746786 | 0.378483 | 1.473487 | 0.399761 |
| RABGGTB  | 0.462829 | 0.255542 | 0.83826  | 0.011018 |
| IFI44L   | 1.392354 | 1.013417 | 1.912984 | 0.041133 |
| IFI44    | 1.419977 | 0.893058 | 2.257787 | 0.138355 |
| SLC44A5  | 28.91687 | 3.043896 | 274.709  | 0.0034   |
| DBT      | 0.324805 | 0.07155  | 1.474459 | 0.145142 |
| IFT172   | 0.295544 | 0.098655 | 0.885375 | 0.029448 |
| CGREF1   | 2.854187 | 0.385423 | 21.13622 | 0.304579 |
| HADHB    | 0.478492 | 0.193613 | 1.182536 | 0.110317 |
| KHK      | 1.860506 | 0.142998 | 24.20651 | 0.635315 |
| ADCY3    | 0.901551 | 0.682115 | 1.191578 | 0.466446 |
| PPM1B    | 0.192383 | 0.046424 | 0.797236 | 0.023064 |
| PNPT1    | 0.386744 | 0.13408  | 1.115533 | 0.078802 |
| DYNC2LI1 | 0.798639 | 0.153181 | 4.163852 | 0.789564 |
| THUMPD2  | 0.498314 | 0.240186 | 1.033854 | 0.061407 |
| CYP1B1   | 1.291414 | 1.030668 | 1.618126 | 0.026251 |
| RAB1A    | 1.462887 | 0.513805 | 4.16508  | 0.476104 |
| ACTR2    | 0.884614 | 0.513591 | 1.52367  | 0.658527 |
| PREB     | 1.023754 | 0.424318 | 2.470012 | 0.958336 |
| SLC5A6   | 0.890929 | 0.461081 | 1.72151  | 0.731113 |
| PREPL    | 0.439815 | 0.168571 | 1.147514 | 0.093201 |
| SLC3A1   | 0.3997   | 0.043211 | 3.697184 | 0.419121 |
| EMILIN1  | 1.220157 | 0.759648 | 1.959833 | 0.410521 |
| FBXO11   | 0.443976 | 0.128498 | 1.533988 | 0.199287 |
| SIX3     | 0.079065 | 0.006732 | 0.928634 | 0.043501 |
| CENPO    | 0.392078 | 0.068216 | 2.253501 | 0.294012 |
| LRPPRC   | 0.426993 | 0.217466 | 0.838399 | 0.013437 |
| DTNB     | 0.546766 | 0.075421 | 3.963805 | 0.550279 |
| ACTR1A   | 0.854285 | 0.359975 | 2.027371 | 0.720966 |
| CYP2C8   | 0.513697 | 0.223594 | 1.180195 | 0.116514 |
| MYOF     | 1.360517 | 1.058082 | 1.749396 | 0.01639  |
| LOXL4    | 0.786934 | 0.424573 | 1.45856  | 0.446613 |
| STAMBPL1 | 0.388698 | 0.211643 | 0.713872 | 0.002314 |

|           |          |          |          |          |
|-----------|----------|----------|----------|----------|
| CH25H     | 2.682469 | 1.150691 | 6.25332  | 0.022313 |
| ATAD1     | 0.699013 | 0.328686 | 1.486581 | 0.352309 |
| KIF11     | 0.644606 | 0.378142 | 1.098839 | 0.106612 |
| DUSP5     | 1.350242 | 0.981298 | 1.857899 | 0.065179 |
| CALHM2    | 2.571004 | 1.539292 | 4.294222 | 0.000309 |
| ARL3      | 1.247521 | 0.510655 | 3.047671 | 0.627477 |
| CEP55     | 0.909115 | 0.541358 | 1.526698 | 0.718658 |
| KIF20B    | 0.83887  | 0.426932 | 1.648279 | 0.61016  |
| ENTPD1    | 1.052217 | 0.756807 | 1.462939 | 0.7621   |
| EXOC6     | 0.235438 | 0.046897 | 1.181983 | 0.07894  |
| PLCE1     | 0.07261  | 0.003977 | 1.325827 | 0.076784 |
| DBR1      | 0.869181 | 0.22962  | 3.290112 | 0.836449 |
| DNAJC13   | 0.709088 | 0.362819 | 1.38583  | 0.314636 |
| GPR87     | 1.424765 | 0.110666 | 18.34314 | 0.785979 |
| ANXA7     | 0.273239 | 0.066305 | 1.126006 | 0.072541 |
| FAM149B1  | 0.535894 | 0.267189 | 1.074829 | 0.078961 |
| ASCC1     | 0.961536 | 0.427155 | 2.164441 | 0.924516 |
| ADAMTS1   | 1.616773 | 0.109379 | 23.89813 | 0.726631 |
| RPS24     | 0.767485 | 0.348018 | 1.692536 | 0.51193  |
| TET1      | 1.840325 | 0.29194  | 11.60098 | 0.516142 |
| DNA2      | 0.17269  | 0.037171 | 0.80228  | 0.025021 |
| AOX1      | 0.605482 | 0.067177 | 5.457386 | 0.654693 |
| ATIC      | 0.312952 | 0.150938 | 0.64887  | 0.001793 |
| SMARCAL1  | 0.334578 | 0.139576 | 0.802015 | 0.014105 |
| BARD1     | 0.463882 | 0.255081 | 0.843601 | 0.011824 |
| STAT4     | 1.244888 | 0.885834 | 1.749478 | 0.207056 |
| ASNSD1    | 0.910492 | 0.500307 | 1.656974 | 0.758886 |
| METTL5    | 0.69113  | 0.317185 | 1.505938 | 0.352544 |
| SSB       | 0.958714 | 0.344594 | 2.667286 | 0.935631 |
| NAB1      | 1.18803  | 0.548221 | 2.574536 | 0.662364 |
| PPIG      | 1.070256 | 0.393787 | 2.908797 | 0.894116 |
| FASTKD1   | 0.539305 | 0.262072 | 1.10981  | 0.093543 |
| IDH1      | 1.204227 | 0.742689 | 1.952583 | 0.451078 |
| OLA1      | 0.525707 | 0.038952 | 7.094987 | 0.62819  |
| CIR1      | 0.959971 | 0.437222 | 2.107728 | 0.918909 |
| FAM117B   | 1.49432  | 0.797137 | 2.801265 | 0.210278 |
| WDR12     | 0.275836 | 0.133434 | 0.570209 | 0.000509 |
| ABI2      | 5.036885 | 0.912119 | 27.81459 | 0.063674 |
| ITGAV     | 1.520192 | 0.901452 | 2.563621 | 0.116216 |
| SLC40A1   | 0.813741 | 0.537312 | 1.232384 | 0.330413 |
| SLC35A5   | 0.857945 | 0.46645  | 1.578023 | 0.622165 |
| SENP7     | 0.280557 | 0.09943  | 0.791631 | 0.01633  |
| COX17     | 1.799452 | 0.746169 | 4.339539 | 0.190862 |
| PARP9     | 1.403329 | 0.855749 | 2.301298 | 0.179373 |
| MNS1      | 0.378894 | 0.148394 | 0.967426 | 0.042437 |
| USP8      | 1.235221 | 0.555296 | 2.747673 | 0.604546 |
| SECISBP2L | 0.769672 | 0.33647  | 1.760614 | 0.535194 |
| TMOD3     | 1.27769  | 0.209263 | 7.80115  | 0.790646 |
| SPPL2A    | 0.850683 | 0.503452 | 1.437399 | 0.54568  |
| GLCE      | 1.048919 | 0.592865 | 1.855787 | 0.869677 |
| SHF       | 2.311376 | 0.684135 | 7.809075 | 0.177387 |
| APH1B     | 1.093104 | 0.58472  | 2.043502 | 0.780339 |
| PARP16    | 0.644297 | 0.184573 | 2.249081 | 0.490692 |
| PPCDC     | 0.757373 | 0.132607 | 4.325671 | 0.754595 |
| SEMA7A    | 4.562436 | 1.13429  | 18.35142 | 0.032565 |
| UBL7      | 0.924117 | 0.396989 | 2.151176 | 0.854751 |
| ARHGAP24  | 1.165394 | 0.461738 | 2.941376 | 0.745916 |
| FAM13A    | 1.653399 | 0.235277 | 11.61918 | 0.613244 |

|          |          |          |          |          |
|----------|----------|----------|----------|----------|
| HERC3    | 1.109243 | 0.485104 | 2.536402 | 0.80592  |
| HERC6    | 1.40493  | 0.636696 | 3.100112 | 0.399815 |
| HERC5    | 0.667467 | 0.45699  | 0.974882 | 0.036476 |
| PCDH10   | 0.570613 | 0.030807 | 10.56894 | 0.706383 |
| COPS4    | 0.930463 | 0.436916 | 1.981531 | 0.851766 |
| HNRNPD   | 0.313247 | 0.132246 | 0.741979 | 0.008333 |
| PRKG2    | 2.74467  | 0.287158 | 26.23368 | 0.380686 |
| RASGEF1B | 0.496004 | 0.112478 | 2.187272 | 0.354359 |
| SEC31A   | 0.820889 | 0.308881 | 2.181612 | 0.692279 |
| BBS7     | 0.801025 | 0.114156 | 5.620747 | 0.823389 |
| KIAA1109 | 0.255444 | 0.033177 | 1.966759 | 0.190035 |
| BMPR1B   | 5.617042 | 0.501355 | 62.93175 | 0.161542 |
| RAP1GDS1 | 0.333071 | 0.096087 | 1.154541 | 0.083026 |
| LARP1B   | 0.093342 | 0.01957  | 0.445202 | 0.002928 |
| MMRN1    | 1.04392  | 0.704679 | 1.546477 | 0.830261 |
| PDE5A    | 1.866306 | 0.236233 | 14.74433 | 0.554065 |
| PRDM5    | 0.111926 | 0.007765 | 1.613407 | 0.107705 |
| NAAA     | 2.162859 | 1.282632 | 3.647158 | 0.003808 |
| NUP54    | 0.574434 | 0.26618  | 1.239664 | 0.157789 |
| CXCL9    | 0.969783 | 0.482811 | 1.947925 | 0.931287 |
| BMP2K    | 0.389015 | 0.131277 | 1.152775 | 0.088484 |
| G3BP2    | 0.706273 | 0.306602 | 1.626937 | 0.414041 |
| FRAS1    | 0.456298 | 0.00439  | 47.42635 | 0.740529 |
| SCARB2   | 1.555127 | 0.937235 | 2.580377 | 0.087438 |
| CCNG2    | 1.849125 | 0.747388 | 4.574952 | 0.183522 |
| CNOT6L   | 0.470311 | 0.090965 | 2.431619 | 0.368155 |
| USO1     | 0.678857 | 0.377796 | 1.219829 | 0.195179 |
| ANXA3    | 0.989554 | 0.811359 | 1.206885 | 0.917438 |
| PPA2     | 0.534036 | 0.164087 | 1.738068 | 0.297474 |
| CENPE    | 0.736946 | 0.368558 | 1.473549 | 0.387919 |
| GSTCD    | 0.000726 | 7.38E-06 | 0.07131  | 0.002014 |
| INTS12   | 0.606176 | 0.291936 | 1.258663 | 0.179322 |
| CASP6    | 0.635681 | 0.418121 | 0.966443 | 0.034035 |
| LEF1     | 0.774208 | 0.544993 | 1.099827 | 0.153079 |
| HADH     | 0.373641 | 0.202972 | 0.687818 | 0.001567 |
| EGF      | 0.592254 | 0.121033 | 2.898087 | 0.517911 |
| PAPSS1   | 0.866655 | 0.510838 | 1.470313 | 0.595658 |
| SEC24B   | 0.707396 | 0.080212 | 6.238572 | 0.755295 |
| PPP3CA   | 0.65627  | 0.276223 | 1.559213 | 0.340115 |
| SLC39A8  | 0.502707 | 0.316969 | 0.797283 | 0.00347  |
| FBN2     | 1.086331 | 0.707772 | 1.667366 | 0.70483  |
| MAPK8IP3 | 1.192116 | 0.489433 | 2.903651 | 0.698837 |
| RGS3     | 0.034664 | 0.000116 | 10.32746 | 0.247399 |
| TTLL8    | 16.82662 | 0.966117 | 293.0648 | 0.052828 |
| RNF185   | 4.449136 | 0.894941 | 22.11856 | 0.068105 |
| PARVG    | 1.15638  | 0.539063 | 2.480625 | 0.709059 |
| B4GALNT3 | 5.06342  | 0.618827 | 41.43033 | 0.130417 |
| PDE6H    | 1.135962 | 0.481099 | 2.682213 | 0.771194 |
| ERP27    | 0.775899 | 0.359414 | 1.675001 | 0.518127 |
| ETV6     | 0.752131 | 0.472536 | 1.19716  | 0.229697 |
| GABARAPI | 1.135043 | 0.756387 | 1.70326  | 0.54074  |
| KIF21A   | 0.981141 | 0.382952 | 2.513725 | 0.96836  |
| CPNE8    | 1.413857 | 1.063435 | 1.87975  | 0.017163 |
| YARS2    | 1.378285 | 0.576355 | 3.296007 | 0.470758 |
| FGD4     | 0.745079 | 0.383793 | 1.446464 | 0.384629 |
| ALG10    | 1.872388 | 0.374321 | 9.365853 | 0.445094 |
| AEBP2    | 1.328416 | 0.393571 | 4.483783 | 0.647273 |
| ETNK1    | 0.518658 | 0.197628 | 1.361176 | 0.182335 |

|          |          |          |          |          |
|----------|----------|----------|----------|----------|
| ZCRB1    | 0.802905 | 0.263199 | 2.449311 | 0.699674 |
| TMEM117  | 0.398029 | 0.032144 | 4.928625 | 0.473031 |
| PRICKLE1 | 1.165928 | 0.895517 | 1.517993 | 0.254168 |
| C1RL     | 1.021227 | 0.536739 | 1.943042 | 0.948968 |
| NDUFA9   | 0.934831 | 0.317977 | 2.748342 | 0.902519 |
| CLSTN3   | 2.728495 | 1.262981 | 5.894535 | 0.010648 |
| KLRG1    | 0.769966 | 0.283331 | 2.092421 | 0.608308 |
| VAMP1    | 0.643742 | 0.215709 | 1.921128 | 0.429785 |
| TAPBPL   | 0.877588 | 0.499946 | 1.540489 | 0.649225 |
| CD27     | 1.190724 | 0.852054 | 1.664007 | 0.306632 |
| RBP5     | 0.900944 | 0.068561 | 11.83917 | 0.936735 |
| PEX5     | 0.334092 | 0.141654 | 0.787958 | 0.012268 |
| SLC38A4  | 2.686346 | 0.540424 | 13.35334 | 0.227126 |
| AMIGO2   | 0.184472 | 0.028656 | 1.187547 | 0.075232 |
| COL2A1   | 2.03654  | 0.27129  | 15.28807 | 0.489224 |
| LLPH     | 0.515876 | 0.249464 | 1.0668   | 0.074176 |
| INHBE    | 0.697675 | 0.087553 | 5.559497 | 0.733887 |
| GLIPR1   | 1.032585 | 0.708303 | 1.505333 | 0.867585 |
| PHLDA1   | 1.217908 | 0.885782 | 1.674565 | 0.224969 |
| TMEM19   | 1.768764 | 0.789042 | 3.964968 | 0.166153 |
| DUSP6    | 1.821451 | 1.268875 | 2.614666 | 0.00115  |
| TMTCC3   | 0.091138 | 0.006533 | 1.271369 | 0.074846 |
| LUM      | 1.024854 | 0.717143 | 1.464596 | 0.892794 |
| SNRPF    | 0.546635 | 0.278743 | 1.071987 | 0.078804 |
| AMDHD1   | 1.116508 | 0.465713 | 2.676736 | 0.804886 |
| NEDD1    | 2.090719 | 0.493939 | 8.849492 | 0.316427 |
| SYCP3    | 1.507399 | 0.017278 | 131.5123 | 0.857157 |
| GAS2L3   | 1.646586 | 0.48965  | 5.537114 | 0.420266 |
| SLC15A4  | 1.99717  | 0.847869 | 4.704368 | 0.11355  |
| TDG      | 0.444991 | 0.179448 | 1.103475 | 0.080557 |
| SDSL     | 1.42628  | 1.006886 | 2.020362 | 0.045653 |
| MMAB     | 0.424465 | 0.040164 | 4.485837 | 0.476267 |
| GLTP     | 1.086436 | 0.579623 | 2.036398 | 0.795928 |
| GIT2     | 0.444949 | 0.192472 | 1.028612 | 0.058227 |
| TCHP     | 0.290124 | 0.068419 | 1.230236 | 0.093182 |
| MTMR6    | 0.874532 | 0.474392 | 1.612181 | 0.667488 |
| SLC46A3  | 0.950943 | 0.467207 | 1.935531 | 0.889669 |
| SLC7A1   | 0.615398 | 0.362817 | 1.043819 | 0.071722 |
| LNX2     | 1.069913 | 0.495238 | 2.31144  | 0.86348  |
| SUOX     | 0.757488 | 0.24798  | 2.313848 | 0.625902 |
| CCDC65   | 1.456042 | 0.470011 | 4.51066  | 0.514874 |
| SLC39A5  | 0.526635 | 0.071598 | 3.873612 | 0.528793 |
| TARBP2   | 0.707957 | 0.322372 | 1.554734 | 0.389526 |
| DHH      | 0.709431 | 0.08119  | 6.198928 | 0.756258 |
| ACVRL1   | 1.370313 | 0.566954 | 3.312013 | 0.484137 |
| GPR84    | 1.10365  | 0.710039 | 1.715458 | 0.661199 |
| N4BP2L1  | 1.156697 | 0.535989 | 2.496222 | 0.710704 |
| SMARCC2  | 1.049714 | 0.35586  | 3.096442 | 0.929949 |
| BRCA2    | 0.378998 | 0.063721 | 2.254186 | 0.286193 |
| MAP3K12  | 1.845841 | 0.548116 | 6.216068 | 0.322468 |
| ITGB7    | 1.204961 | 0.86951  | 1.669827 | 0.262708 |
| GALNT6   | 1.14261  | 0.418619 | 3.118725 | 0.794691 |
| CSAD     | 1.069201 | 0.319507 | 3.577983 | 0.913541 |
| LMBR1L   | 3.55627  | 0.761821 | 16.60108 | 0.106548 |
| ESYT1    | 0.491855 | 0.242326 | 0.998334 | 0.049463 |
| TMBIM6   | 1.043462 | 0.435713 | 2.498922 | 0.923933 |
| ANKRD52  | 1.542131 | 0.372161 | 6.390161 | 0.550368 |
| ZNF740   | 0.436395 | 0.115659 | 1.646572 | 0.220991 |

|         |          |          |          |          |
|---------|----------|----------|----------|----------|
| WDFY2   | 0.547682 | 0.268313 | 1.11793  | 0.098178 |
| HNRNPA1 | 0.186769 | 0.055851 | 0.624569 | 0.006446 |
| ESD     | 0.726865 | 0.376668 | 1.402649 | 0.341534 |
| RB1     | 1.091077 | 0.578238 | 2.058751 | 0.787877 |
| SBNO1   | 0.219543 | 0.060272 | 0.799693 | 0.021512 |
| MORN3   | 0.856632 | 0.097298 | 7.541926 | 0.889108 |
| SETD1B  | 3.106403 | 1.162492 | 8.300908 | 0.023809 |
| VPS33A  | 0.216246 | 0.0595   | 0.785917 | 0.020026 |
| VPS37B  | 1.477213 | 0.87542  | 2.492701 | 0.143866 |
| RHOF    | 1.711578 | 0.80303  | 3.648058 | 0.163971 |
| DENR    | 0.5615   | 0.252622 | 1.24804  | 0.156704 |
| DIAPH3  | 0.422057 | 0.073253 | 2.431745 | 0.334326 |
| SLAIN1  | 0.576292 | 0.328462 | 1.011114 | 0.054677 |
| RBM26   | 0.291895 | 0.09092  | 0.937119 | 0.038537 |
| MBNL2   | 0.879226 | 0.349028 | 2.214829 | 0.78481  |
| ABHD13  | 4.781569 | 0.627922 | 36.4112  | 0.130864 |
| RAB20   | 2.007154 | 1.177849 | 3.42036  | 0.010411 |
| GRTP1   | 0.325292 | 0.017673 | 5.987528 | 0.449836 |
| CUL4A   | 0.206488 | 0.039489 | 1.079723 | 0.061611 |
| CDH24   | 0.209603 | 0.005042 | 8.714128 | 0.411302 |
| REM2    | 1.22437  | 0.381789 | 3.926464 | 0.733507 |
| CBLN3   | 1.292925 | 0.342573 | 4.879699 | 0.704604 |
| TSSK4   | 0.307824 | 0.02123  | 4.463368 | 0.387827 |
| TMX1    | 0.409191 | 0.135888 | 1.232173 | 0.112115 |
| FRMD6   | 0.152184 | 0.015204 | 1.523307 | 0.109187 |
| PELI2   | 0.953    | 0.562349 | 1.615026 | 0.858038 |
| RTN1    | 2.582165 | 1.073982 | 6.208278 | 0.034055 |
| SLC38A6 | 1.45637  | 0.587113 | 3.612616 | 0.417327 |
| RDH12   | 0.438618 | 0.024998 | 7.695976 | 0.572874 |
| RAB15   | 1.974748 | 0.958811 | 4.067151 | 0.064912 |
| WDR89   | 0.259664 | 0.023361 | 2.88625  | 0.272493 |
| ESR2    | 1.331274 | 0.102404 | 17.30678 | 0.826926 |
| STON2   | 3.414538 | 0.456374 | 25.54718 | 0.231699 |
| GPR65   | 1.275615 | 0.869656 | 1.871077 | 0.21297  |
| PTGR2   | 1.432387 | 0.705651 | 2.907577 | 0.319832 |
| JDP2    | 1.081739 | 0.565642 | 2.068727 | 0.81226  |
| AK7     | 0.064519 | 0.003979 | 1.046061 | 0.05382  |
| SLC24A4 | 1.284064 | 0.644561 | 2.558051 | 0.477068 |
| FBLN5   | 0.904837 | 0.333556 | 2.454547 | 0.844296 |
| WDR20   | 3.845056 | 0.805529 | 18.35372 | 0.091259 |
| NIPA2   | 0.349926 | 0.107329 | 1.140873 | 0.081615 |
| SLC12A6 | 0.087926 | 0.011715 | 0.659937 | 0.018074 |
| MFAP1   | 1.357469 | 0.624139 | 2.95242  | 0.440754 |
| TCF12   | 0.696272 | 0.262777 | 1.844887 | 0.46652  |
| SORD    | 0.712784 | 0.364184 | 1.395068 | 0.323053 |
| SERF2   | 0.789458 | 0.231164 | 2.696113 | 0.705983 |
| ZSCAN29 | 0.202291 | 0.036851 | 1.110466 | 0.065862 |
| LYSMD2  | 1.294924 | 0.688187 | 2.436589 | 0.422942 |
| SLC27A2 | 0.549712 | 0.369028 | 0.818861 | 0.003253 |
| HDC     | 0.830093 | 0.680764 | 1.012178 | 0.065719 |
| BNIP2   | 0.701351 | 0.407938 | 1.205804 | 0.199466 |
| GTF2A2  | 0.451279 | 0.179104 | 1.137065 | 0.091501 |
| SRP14   | 0.400814 | 0.135933 | 1.181846 | 0.097493 |
| BAHD1   | 2.208531 | 0.668519 | 7.296141 | 0.19377  |
| DISP2   | 0.272126 | 0.019551 | 3.787669 | 0.332685 |
| CDAN1   | 0.043559 | 0.004986 | 0.380568 | 0.004604 |
| TLE3    | 1.624619 | 0.882078 | 2.992237 | 0.119399 |
| ANP32A  | 1.33823  | 0.737767 | 2.427406 | 0.337584 |

|          |          |          |          |          |
|----------|----------|----------|----------|----------|
| COMMD4   | 0.870985 | 0.18752  | 4.045514 | 0.860069 |
| UBE2Q2   | 0.617382 | 0.321266 | 1.186433 | 0.147889 |
| PSTPIP1  | 1.220219 | 0.877142 | 1.697484 | 0.237333 |
| ETFA     | 0.471551 | 0.199585 | 1.114114 | 0.086596 |
| BCL2A1   | 1.267961 | 0.953217 | 1.68663  | 0.102925 |
| HMG20A   | 1.14681  | 0.308402 | 4.26448  | 0.838019 |
| SCAPER   | 1.441458 | 0.437089 | 4.753723 | 0.548112 |
| TSPAN3   | 0.639935 | 0.369542 | 1.108172 | 0.111083 |
| WDR61    | 0.315356 | 0.128001 | 0.776943 | 0.012122 |
| NCOA2    | 1.143963 | 0.212894 | 6.14697  | 0.875421 |
| NEIL1    | 0.456679 | 0.047182 | 4.420246 | 0.498573 |
| MAN2C1   | 1.127703 | 0.576889 | 2.204431 | 0.725272 |
| DNAJA4   | 0.870122 | 0.622602 | 1.216046 | 0.415291 |
| TPM1     | 0.960892 | 0.512195 | 1.802658 | 0.901096 |
| IGF1R    | 0.779971 | 0.215829 | 2.818687 | 0.704618 |
| ARRDC4   | 1.032684 | 0.56068  | 1.902038 | 0.9178   |
| PIF1     | 1.392349 | 0.429664 | 4.511979 | 0.58111  |
| USP3     | 1.012922 | 0.630142 | 1.628222 | 0.957718 |
| BBS4     | 0.415002 | 0.182661 | 0.942874 | 0.035689 |
| PML      | 0.326891 | 0.020263 | 5.27346  | 0.430653 |
| CYP1A1   | 0.100125 | 0.013169 | 0.761253 | 0.02618  |
| ADAMTS1  | 0.410906 | 0.03032  | 5.56874  | 0.503646 |
| LINS1    | 0.915792 | 0.132375 | 6.335615 | 0.928971 |
| ULK3     | 1.938688 | 0.685698 | 5.481291 | 0.211878 |
| PCSK6    | 1.703131 | 0.1202   | 24.13191 | 0.693832 |
| SCAMP2   | 1.953505 | 0.795855 | 4.795072 | 0.143858 |
| HAPLN3   | 1.288966 | 0.559294 | 2.970592 | 0.551251 |
| POLG     | 0.796636 | 0.291224 | 2.179184 | 0.657897 |
| RLBP1    | 3.796986 | 0.322734 | 44.67181 | 0.288784 |
| FANCI    | 0.356367 | 0.195725 | 0.648859 | 0.000739 |
| ABHD2    | 0.748394 | 0.135658 | 4.128726 | 0.739421 |
| DET1     | 0.649886 | 0.256665 | 1.645536 | 0.363248 |
| MFG8     | 1.245753 | 0.899237 | 1.725796 | 0.186395 |
| ZNF710   | 0.604147 | 0.042886 | 8.510828 | 0.708864 |
| UNC45A   | 1.403873 | 0.275258 | 7.160048 | 0.68321  |
| MCTP2    | 0.413382 | 0.213356 | 0.800936 | 0.008851 |
| FURIN    | 1.75403  | 0.909218 | 3.383811 | 0.093721 |
| IQGAP1   | 1.137603 | 0.751182 | 1.722804 | 0.542634 |
| CRTC3    | 0.95755  | 0.557121 | 1.645783 | 0.875262 |
| SEC11A   | 0.889018 | 0.412313 | 1.916876 | 0.764111 |
| PMM2     | 1.292438 | 0.514176 | 3.248683 | 0.585416 |
| ITGAX    | 1.001566 | 0.593316 | 1.690724 | 0.995326 |
| TGFB111  | 1.405161 | 0.552267 | 3.575219 | 0.475294 |
| ARMC5    | 0.934966 | 0.538718 | 1.62267  | 0.811059 |
| PARN     | 0.279198 | 0.119773 | 0.65083  | 0.00313  |
| FTO      | 0.940072 | 0.738298 | 1.196991 | 0.616149 |
| UQCRC2   | 0.799425 | 0.361438 | 1.768158 | 0.580443 |
| CDR2     | 0.595035 | 0.290366 | 1.219381 | 0.156149 |
| IGSF6    | 1.2902   | 0.914451 | 1.820346 | 0.146847 |
| ARHGAP11 | 1.688674 | 0.48938  | 5.827005 | 0.407038 |
| NKD1     | 0.131974 | 0.015933 | 1.093129 | 0.060461 |
| DHX38    | 1.081285 | 0.377268 | 3.09906  | 0.884341 |
| TXNL4B   | 0.494463 | 0.09716  | 2.516417 | 0.396242 |
| ZFH3     | 1.275787 | 0.854912 | 1.903861 | 0.233072 |
| CPNE2    | 2.644434 | 1.151322 | 6.073911 | 0.0219   |
| NLRC5    | 1.441432 | 0.836058 | 2.485149 | 0.188287 |
| KATNB1   | 0.67262  | 0.342466 | 1.321059 | 0.249526 |
| KIFC3    | 1.161837 | 0.771108 | 1.750551 | 0.473255 |

|          |          |          |          |          |
|----------|----------|----------|----------|----------|
| ADAMTS1  | 0.070253 | 0.002787 | 1.770983 | 0.106776 |
| NUDT7    | 0.972644 | 0.63875  | 1.481075 | 0.897134 |
| GCSH     | 0.591811 | 0.18422  | 1.901212 | 0.378339 |
| CMTM3    | 2.033939 | 0.445385 | 9.288383 | 0.359559 |
| CMTM2    | 0.981521 | 0.727367 | 1.32448  | 0.902905 |
| NOL3     | 6.034407 | 1.145825 | 31.77978 | 0.033959 |
| MAP1LC3E | 0.843872 | 0.436037 | 1.633164 | 0.61433  |
| MBTPS1   | 0.389781 | 0.146467 | 1.037291 | 0.059207 |
| ZCCHC14  | 1.479021 | 0.777795 | 2.812443 | 0.232636 |
| OSGIN1   | 5.308147 | 0.200198 | 140.743  | 0.318203 |
| IRF8     | 1.240749 | 1.002532 | 1.535569 | 0.047344 |
| RHOT2    | 1.25787  | 0.550563 | 2.873851 | 0.586289 |
| RPL3L    | 0.365311 | 0.048303 | 2.762813 | 0.32931  |
| RPS2     | 2.256619 | 0.740124 | 6.880376 | 0.152465 |
| NDUFB10  | 0.954618 | 0.403583 | 2.258016 | 0.915795 |
| PDPK1    | 0.319628 | 0.052646 | 1.940549 | 0.215159 |
| TIGD7    | 0.606732 | 0.281014 | 1.309982 | 0.203236 |
| DEF8     | 1.92062  | 0.976234 | 3.778585 | 0.058718 |
| TCF25    | 0.564539 | 0.215902 | 1.476156 | 0.243675 |
| GALNS    | 0.831372 | 0.362295 | 1.90778  | 0.663    |
| GAS8     | 0.66377  | 0.295098 | 1.49303  | 0.321746 |
| MED9     | 3.605938 | 1.583407 | 8.211906 | 0.002255 |
| NCOR1    | 0.613469 | 0.258529 | 1.455711 | 0.26774  |
| COPS3    | 0.289654 | 0.141616 | 0.592442 | 0.000689 |
| ZNF287   | 3.065433 | 0.304333 | 30.87693 | 0.341848 |
| KSR1     | 0.839909 | 0.224871 | 3.137122 | 0.795263 |
| RANBP10  | 1.135932 | 0.632965 | 2.038566 | 0.669258 |
| DPEP3    | 1.234119 | 0.989157 | 1.539743 | 0.062407 |
| GFOD2    | 0.603246 | 0.273331 | 1.331372 | 0.210804 |
| NOB1     | 1.341251 | 0.637013 | 2.824046 | 0.439602 |
| PRPSAP2  | 0.718824 | 0.240905 | 2.14486  | 0.553925 |
| PCTP     | 1.030705 | 0.518859 | 2.047482 | 0.931179 |
| TOM1L1   | 1.424736 | 0.413641 | 4.907337 | 0.574804 |
| TOB1     | 1.012525 | 0.666669 | 1.537805 | 0.953448 |
| VPS53    | 0.581563 | 0.097442 | 3.470919 | 0.552056 |
| SGSM2    | 0.65104  | 0.343374 | 1.234378 | 0.188556 |
| NPEPPS   | 1.428834 | 0.162032 | 12.5998  | 0.747977 |
| SKAP1    | 0.935272 | 0.615408 | 1.421387 | 0.754008 |
| LRRC46   | 0.51083  | 0.073144 | 3.567565 | 0.498169 |
| SCRN2    | 1.480986 | 0.328016 | 6.686624 | 0.609624 |
| SSH2     | 1.3507   | 0.86337  | 2.113102 | 0.187983 |
| RHBDL3   | 1.091581 | 0.357874 | 3.329525 | 0.877606 |
| ARSG     | 1.442894 | 0.556589 | 3.740535 | 0.450611 |
| G6PC3    | 1.667805 | 0.966873 | 2.876876 | 0.065937 |
| CLTC     | 0.656736 | 0.321558 | 1.34129  | 0.24848  |
| BCAS3    | 0.965505 | 0.170483 | 5.467983 | 0.96835  |
| PTRH2    | 0.875172 | 0.326652 | 2.34478  | 0.790879 |
| SS18     | 0.220037 | 0.05098  | 0.949715 | 0.042447 |
| TAF4B    | 0.694626 | 0.301244 | 1.601708 | 0.392641 |
| AFG3L2   | 0.419627 | 0.18611  | 0.946145 | 0.036312 |
| IMPA2    | 0.669883 | 0.302308 | 1.484394 | 0.323674 |
| GNAL     | 5.388475 | 0.170229 | 170.5685 | 0.339331 |
| SLC39A6  | 0.622447 | 0.277176 | 1.397814 | 0.250727 |
| RPRD1A   | 0.367536 | 0.165264 | 0.817374 | 0.014109 |
| GALNT1   | 0.446212 | 0.15211  | 1.308955 | 0.141658 |
| ADCYAP1  | 2.07875  | 0.100464 | 43.01259 | 0.635936 |
| ESCO1    | 0.866581 | 0.312441 | 2.403541 | 0.783221 |
| OSBPL1A  | 1.196041 | 0.467346 | 3.060937 | 0.708865 |

|           |          |          |          |          |
|-----------|----------|----------|----------|----------|
| PELP1     | 0.936621 | 0.462245 | 1.897821 | 0.855798 |
| NPC1      | 2.048674 | 0.936708 | 4.480655 | 0.072461 |
| SLC14A1   | 0.54999  | 0.22983  | 1.316144 | 0.1793   |
| ARRB2     | 2.23536  | 1.019088 | 4.903243 | 0.044734 |
| ZMYND15   | 1.16268  | 0.797947 | 1.694126 | 0.432586 |
| MINK1     | 0.979334 | 0.18048  | 5.314124 | 0.980693 |
| SAT2      | 2.388494 | 1.076595 | 5.299026 | 0.032235 |
| ASGR1     | 1.202764 | 0.97081  | 1.49014  | 0.091228 |
| PIK3R5    | 1.715842 | 0.452356 | 6.508405 | 0.427353 |
| TP53      | 1.531619 | 0.885919 | 2.647937 | 0.126934 |
| ARHGDI1   | 1.734831 | 0.953812 | 3.155379 | 0.071071 |
| TMC6      | 1.099155 | 0.633868 | 1.905982 | 0.736399 |
| SLC16A3   | 1.357072 | 0.894748 | 2.058282 | 0.150811 |
| CARD14    | 0.5994   | 0.046517 | 7.723633 | 0.694722 |
| TTYH2     | 4.156376 | 0.923735 | 18.70175 | 0.063371 |
| RAB40B    | 2.355502 | 1.07194  | 5.176029 | 0.032932 |
| EIF4A3    | 0.567804 | 0.19363  | 1.665042 | 0.302489 |
| CSNK1D    | 1.340033 | 0.608845 | 2.949335 | 0.467109 |
| ANAPC11   | 1.228385 | 0.14178  | 10.64274 | 0.851879 |
| TBCD      | 1.076826 | 0.391699 | 2.960317 | 0.885931 |
| FN3KRP    | 0.411622 | 0.176157 | 0.961826 | 0.04038  |
| NARF      | 0.567235 | 0.274425 | 1.172468 | 0.1259   |
| RPTOR     | 3.616269 | 0.841779 | 15.53543 | 0.083921 |
| FOXK2     | 6.021408 | 0.646919 | 56.04623 | 0.114723 |
| TRIM65    | 0.886351 | 0.266064 | 2.95274  | 0.844224 |
| CBX8      | 1.536223 | 0.367942 | 6.414006 | 0.556006 |
| SECTM1    | 2.419805 | 0.505519 | 11.58307 | 0.268683 |
| RNF157    | 0.744121 | 0.197388 | 2.80522  | 0.662463 |
| ZNF750    | 0.276284 | 0.02001  | 3.814665 | 0.336867 |
| CBX4      | 1.458036 | 0.865099 | 2.457371 | 0.156815 |
| RNF165    | 1.412659 | 0.884501 | 2.256193 | 0.148123 |
| DYM       | 0.932275 | 0.401642 | 2.163957 | 0.87034  |
| ELAC1     | 0.753707 | 0.192705 | 2.947901 | 0.684494 |
| MBD1      | 0.401412 | 0.14257  | 1.130195 | 0.083947 |
| SMAD4     | 1.067621 | 0.529018 | 2.154588 | 0.855077 |
| TNFRSF11L | 7.06374  | 0.748334 | 66.67664 | 0.087849 |
| ZCCHC2    | 2.103334 | 0.2578   | 17.16066 | 0.487531 |
| PMAIP1    | 0.909068 | 0.582898 | 1.417752 | 0.674153 |
| ERBB2     | 0.222832 | 0.009214 | 5.389286 | 0.355661 |
| PNMT      | 0.30219  | 0.084498 | 1.080729 | 0.065686 |
| ARL5C     | 2.667368 | 0.555812 | 12.80083 | 0.220193 |
| IGFBP4    | 1.894533 | 0.892983 | 4.019397 | 0.095908 |
| FKBP10    | 0.165602 | 0.014331 | 1.9136   | 0.149816 |
| TXNL4A    | 0.391252 | 0.07399  | 2.068898 | 0.269434 |
| SAMD1     | 2.000068 | 1.093442 | 3.658422 | 0.024455 |
| BRD4      | 2.970293 | 0.750296 | 11.75889 | 0.120964 |
| SLC39A3   | 0.740252 | 0.459503 | 1.192535 | 0.216375 |
| NFIC      | 1.202626 | 0.287021 | 5.039033 | 0.800725 |
| PRDM15    | 0.089368 | 0.005164 | 1.546663 | 0.09688  |
| PFKL      | 2.382455 | 0.693889 | 8.180113 | 0.167793 |
| FEM1A     | 0.721296 | 0.335784 | 1.549416 | 0.402317 |
| VAV1      | 1.060211 | 0.644952 | 1.742837 | 0.817664 |
| CIB3      | 0.107639 | 0.005327 | 2.17514  | 0.146142 |
| SH3GL1    | 1.128791 | 0.481871 | 2.644212 | 0.780287 |
| DUS3L     | 1.076281 | 0.587096 | 1.973067 | 0.812095 |
| DPP9      | 1.261455 | 0.513238 | 3.100451 | 0.612704 |
| CCDC97    | 1.365302 | 0.669267 | 2.785211 | 0.391997 |
| TMEM91    | 1.21486  | 0.775618 | 1.902849 | 0.395264 |



|           |          |          |          |          |
|-----------|----------|----------|----------|----------|
| ZFP14     | 0.471263 | 0.101416 | 2.189885 | 0.337115 |
| SIRT3     | 0.414553 | 0.010811 | 15.89626 | 0.636018 |
| IFITM3    | 1.435761 | 1.18707  | 1.736554 | 0.000194 |
| COL6A1    | 1.352092 | 1.007638 | 1.814293 | 0.044359 |
| IFNAR1    | 0.796184 | 0.443897 | 1.428054 | 0.444494 |
| SOD1      | 0.806915 | 0.339379 | 1.918537 | 0.627327 |
| COL6A2    | 1.715025 | 0.827716 | 3.553528 | 0.146709 |
| SIK1      | 0.948792 | 0.661441 | 1.360977 | 0.775203 |
| TRPM2     | 0.813401 | 0.316641 | 2.089498 | 0.667884 |
| SCYL1     | 0.985354 | 0.410916 | 2.362824 | 0.973624 |
| TMEM50B   | 0.513816 | 0.162691 | 1.622757 | 0.25643  |
| APP       | 0.910925 | 0.635421 | 1.305882 | 0.611675 |
| URB1      | 0.460431 | 0.096842 | 2.189093 | 0.329551 |
| AKT1      | 2.280175 | 0.645767 | 8.051193 | 0.200351 |
| EMP3      | 1.898949 | 1.19703  | 3.012461 | 0.006453 |
| SAE1      | 0.169113 | 0.052592 | 0.543792 | 0.002862 |
| NTN5      | 6.502166 | 0.528979 | 79.92405 | 0.143605 |
| LMTK3     | 1.642045 | 1.08175  | 2.492546 | 0.01986  |
| GEMIN7    | 1.183919 | 0.065668 | 21.34473 | 0.908905 |
| ADAMTS1   | 0.35904  | 0.033123 | 3.891798 | 0.399557 |
| RNPEPL1   | 1.6522   | 0.879168 | 3.10494  | 0.118786 |
| CAPN10    | 2.184423 | 0.041788 | 114.1885 | 0.698708 |
| MYO1F     | 1.27602  | 0.828014 | 1.966424 | 0.269307 |
| NLRP12    | 1.339663 | 0.818384 | 2.192978 | 0.244868 |
| ZNF787    | 1.339079 | 0.59115  | 3.033296 | 0.483998 |
| CARM1     | 1.530869 | 0.79969  | 2.930583 | 0.198692 |
| EVI5L     | 1.486812 | 0.682829 | 3.237428 | 0.317781 |
| SLC47A1   | 1.030963 | 0.289061 | 3.677027 | 0.962513 |
| PSMB6     | 0.497454 | 0.153014 | 1.617243 | 0.245725 |
| GPR32     | 0.568456 | 0.036423 | 8.871935 | 0.687024 |
| SIGLEC10  | 0.900798 | 0.697609 | 1.16317  | 0.423107 |
| ZNF473    | 0.431852 | 0.034424 | 5.417608 | 0.515267 |
| FAM71E1   | 1.297113 | 0.462612 | 3.636963 | 0.620929 |
| RPS11     | 3.792077 | 0.252523 | 56.94475 | 0.334893 |
| PTH2      | 0.088472 | 0.008895 | 0.880011 | 0.038544 |
| RPL13A    | 1.016021 | 0.49744  | 2.075222 | 0.965208 |
| NOSIP     | 1.787196 | 1.055483 | 3.026171 | 0.030701 |
| RCN3      | 1.141278 | 0.461019 | 2.825299 | 0.775083 |
| ZNF614    | 0.717013 | 0.316755 | 1.623046 | 0.424824 |
| SLC2A5    | 1.324285 | 0.988505 | 1.774124 | 0.059772 |
| RERE      | 1.910948 | 0.705612 | 5.175253 | 0.202663 |
| PRDM16    | 5.526317 | 1.681531 | 18.16213 | 0.004862 |
| PADI3     | 3.255017 | 0.251759 | 42.0844  | 0.366125 |
| EPHA2     | 4.340485 | 0.543549 | 34.66073 | 0.166097 |
| ARHGEF19  | 0.820834 | 0.334296 | 2.015486 | 0.666631 |
| EFHD2     | 1.431961 | 0.875171 | 2.342987 | 0.152944 |
| PEX14     | 1.698708 | 0.85098  | 3.390926 | 0.13299  |
| PGD       | 1.4964   | 0.806617 | 2.776058 | 0.201122 |
| SH3BGRL3  | 2.68633  | 1.51023  | 4.778326 | 0.000771 |
| CNKSR1    | 0.502274 | 0.058634 | 4.302584 | 0.529755 |
| RPL11     | 0.192103 | 0.018662 | 1.977482 | 0.165502 |
| KIAA0319L | 0.50378  | 0.13275  | 1.911825 | 0.313657 |
| PLK4      | 0.476347 | 0.265754 | 0.853824 | 0.012749 |
| MAP3K6    | 1.519436 | 1.036282 | 2.227854 | 0.032154 |
| GPN2      | 0.79804  | 0.340515 | 1.870308 | 0.603654 |
| SYTL1     | 1.629792 | 0.986474 | 2.692643 | 0.056547 |
| WDTC1     | 3.431711 | 0.705891 | 16.68336 | 0.126443 |
| NBPF3     | 0.732103 | 0.085582 | 6.262722 | 0.775842 |

|          |          |          |          |          |
|----------|----------|----------|----------|----------|
| HSPG2    | 2.182021 | 0.446269 | 10.66895 | 0.335263 |
| ITGB3BP  | 0.775734 | 0.435847 | 1.380675 | 0.387957 |
| SERBP1   | 0.432487 | 0.218417 | 0.856363 | 0.01618  |
| BCL10    | 1.330365 | 0.294998 | 5.999601 | 0.710309 |
| PRKACB   | 0.821932 | 0.233124 | 2.897912 | 0.760356 |
| PIGK     | 0.835648 | 0.418952 | 1.666796 | 0.610277 |
| TINAGL1  | 2.317464 | 0.090289 | 59.48274 | 0.611728 |
| RPS8     | 1.002441 | 0.354943 | 2.831126 | 0.996328 |
| KIF2C    | 0.574677 | 0.295794 | 1.116501 | 0.102101 |
| PTPRF    | 1.180168 | 0.656429 | 2.121779 | 0.579921 |
| BEST4    | 1.900879 | 0.450179 | 8.026447 | 0.382124 |
| LMO4     | 1.114742 | 0.834892 | 1.488396 | 0.461443 |
| MTF2     | 0.367889 | 0.167956 | 0.805818 | 0.012432 |
| IGSF3    | 1.256357 | 0.186602 | 8.458821 | 0.814554 |
| ZNF697   | 2.811414 | 1.098359 | 7.196233 | 0.031114 |
| CTTNBP2N | 2.849201 | 0.603287 | 13.45619 | 0.186193 |
| PSMA5    | 0.345003 | 0.159809 | 0.744807 | 0.006722 |
| FNDC7    | 1.536857 | 0.110941 | 21.29003 | 0.748635 |
| CD53     | 0.943062 | 0.547938 | 1.623113 | 0.832409 |
| CELSR2   | 1.673396 | 0.337119 | 8.306433 | 0.528806 |
| ITGA10   | 0.936001 | 0.097551 | 8.980918 | 0.954285 |
| GPR161   | 0.236796 | 0.007791 | 7.197407 | 0.408265 |
| ALDH9A1  | 1.641993 | 0.6453   | 4.178122 | 0.298013 |
| ATP1B1   | 0.938418 | 0.634745 | 1.387374 | 0.750009 |
| TIPRL    | 0.374268 | 0.11852  | 1.181881 | 0.093908 |
| NME7     | 0.548695 | 0.27625  | 1.089833 | 0.086479 |
| POGK     | 1.033363 | 0.495833 | 2.153625 | 0.9302   |
| CREG1    | 0.699656 | 0.330986 | 1.478969 | 0.349668 |
| DCAF6    | 0.455758 | 0.188161 | 1.103925 | 0.081698 |
| GPA33    | 0.758856 | 0.54001  | 1.066392 | 0.111913 |
| TBX19    | 0.715377 | 0.135294 | 3.78262  | 0.693435 |
| UCK2     | 0.483064 | 0.226927 | 1.028308 | 0.059087 |
| TMCO1    | 0.650022 | 0.277986 | 1.519966 | 0.320273 |
| XCL1     | 6.16459  | 0.208888 | 181.9265 | 0.292253 |
| XCL2     | 4.099884 | 0.55209  | 30.44618 | 0.167813 |
| POU2F1   | 0.376298 | 0.154238 | 0.918064 | 0.031727 |
| ILDR2    | 0.281554 | 0.011088 | 7.149684 | 0.442483 |
| MGST3    | 1.737772 | 0.912493 | 3.30945  | 0.092697 |
| ADCY10   | 0.954321 | 0.070866 | 12.85148 | 0.971886 |
| UFC1     | 0.681407 | 0.394196 | 1.177879 | 0.169539 |
| PPOX     | 0.731493 | 0.427758 | 1.250898 | 0.253376 |
| FCGR2A   | 1.179609 | 0.76282  | 1.824123 | 0.457666 |
| NUF2     | 0.372109 | 0.094497 | 1.465287 | 0.157468 |
| RGS5     | 1.227217 | 0.048974 | 30.75205 | 0.900855 |
| SDHC     | 1.079111 | 0.331889 | 3.508647 | 0.899288 |
| PFDN2    | 3.723224 | 0.669486 | 20.70601 | 0.133193 |
| NR1I3    | 63.75241 | 0.379793 | 10701.54 | 0.111928 |
| USP21    | 2.715531 | 0.734553 | 10.03891 | 0.134258 |
| PRCC     | 4.368233 | 1.375571 | 13.87167 | 0.01239  |
| FCRL5    | 0.551389 | 0.048603 | 6.255376 | 0.630937 |
| MRPL24   | 0.894084 | 0.293834 | 2.720538 | 0.84368  |
| PIGM     | 1.36051  | 0.605804 | 3.055425 | 0.45579  |
| CASQ1    | 1.060018 | 0.129357 | 8.686313 | 0.956688 |
| ISG20L2  | 1.773191 | 0.923817 | 3.403495 | 0.085112 |
| CRABP2   | 0.692216 | 0.112429 | 4.261919 | 0.691608 |
| HDGF     | 0.818138 | 0.40417  | 1.656112 | 0.57693  |
| ABL2     | 0.872462 | 0.022184 | 34.31329 | 0.941946 |
| XPR1     | 1.986124 | 0.685029 | 5.758422 | 0.206433 |

|          |          |          |          |          |
|----------|----------|----------|----------|----------|
| RGS16    | 1.330758 | 0.357627 | 4.951853 | 0.669948 |
| TOR1AIP1 | 0.723729 | 0.384544 | 1.362089 | 0.31626  |
| RGL1     | 2.522112 | 1.184047 | 5.372293 | 0.016492 |
| LYPLAL1  | 1.575753 | 0.58784  | 4.223936 | 0.366057 |
| LHX9     | 0.950043 | 0.043682 | 20.66258 | 0.973981 |
| TUFT1    | 1.425767 | 0.900626 | 2.257111 | 0.130178 |
| SF3B4    | 1.607479 | 0.597566 | 4.324194 | 0.347142 |
| ECM1     | 3.395354 | 1.887314 | 6.10838  | 4.51E-05 |
| ZNF687   | 1.250617 | 0.414182 | 3.776221 | 0.691633 |
| TARS2    | 1.479942 | 0.672584 | 3.25644  | 0.329941 |
| SNX27    | 0.917203 | 0.530641 | 1.585367 | 0.756911 |
| SETDB1   | 0.785052 | 0.360757 | 1.70837  | 0.541846 |
| ADAMTSL  | 2.508909 | 1.48593  | 4.236152 | 0.000578 |
| MCL1     | 0.927872 | 0.648164 | 1.328284 | 0.682544 |
| CTSK     | 0.853863 | 0.421467 | 1.729871 | 0.660974 |
| RFX5     | 0.347787 | 0.106664 | 1.133985 | 0.079868 |
| PI4KB    | 0.914637 | 0.252691 | 3.310605 | 0.891858 |
| PIP5K1A  | 0.731429 | 0.1417   | 3.775516 | 0.708792 |
| ANP32E   | 3.570738 | 0.76634  | 16.63774 | 0.105014 |
| ANXA9    | 2.404203 | 0.154346 | 37.44953 | 0.531205 |
| SELENBP1 | 1.001927 | 0.805636 | 1.246044 | 0.986195 |
| ENSA     | 1.295668 | 0.566489 | 2.963439 | 0.539451 |
| SEMA6C   | 2.107509 | 0.965466 | 4.600467 | 0.061244 |
| MRPL9    | 0.589455 | 0.197233 | 1.761655 | 0.344026 |
| ARNT     | 1.434627 | 0.526471 | 3.909341 | 0.480423 |
| POGZ     | 0.124686 | 0.016634 | 0.934615 | 0.042789 |
| HORMAD   | 0.880746 | 0.068815 | 11.27253 | 0.922228 |
| GOLPH3L  | 0.971494 | 0.425711 | 2.216999 | 0.945228 |
| GABPB2   | 0.799541 | 0.102864 | 6.214657 | 0.830682 |
| DTL      | 0.560138 | 0.286288 | 1.095943 | 0.090563 |
| DYRK3    | 0.523684 | 0.187013 | 1.466449 | 0.218228 |
| INTS7    | 0.453997 | 0.132048 | 1.5609   | 0.210103 |
| VASH2    | 1.648069 | 0.381925 | 7.111698 | 0.503043 |
| TAF1A    | 0.046382 | 0.002812 | 0.764971 | 0.031769 |
| SMYD2    | 0.334819 | 0.093322 | 1.20126  | 0.093222 |
| SUSD4    | 0.735388 | 0.028043 | 19.28467 | 0.853691 |
| DUSP10   | 0.668319 | 0.37338  | 1.196234 | 0.174867 |
| TP53BP2  | 0.849267 | 0.352741 | 2.04471  | 0.715519 |
| ATP8B2   | 3.418337 | 1.059477 | 11.02905 | 0.039721 |
| ADAM15   | 2.97815  | 1.471068 | 6.029207 | 0.002425 |
| JTB      | 0.580491 | 0.16054  | 2.098976 | 0.406907 |
| RAB13    | 1.468831 | 0.944794 | 2.283529 | 0.087688 |
| S100A8   | 1.065837 | 0.821522 | 1.382811 | 0.631236 |
| TPM3     | 0.76749  | 0.148515 | 3.966215 | 0.752163 |
| NUP210L  | 0.282907 | 0.010873 | 7.360906 | 0.447618 |
| SNAPIN   | 0.603754 | 0.205978 | 1.769693 | 0.357761 |
| SLC27A3  | 1.609319 | 0.984806 | 2.629867 | 0.057583 |
| UBAP2L   | 1.23954  | 0.643358 | 2.388185 | 0.521008 |
| SLC39A1  | 1.14756  | 0.496501 | 2.652351 | 0.74746  |
| HAX1     | 0.759372 | 0.306394 | 1.882037 | 0.552231 |
| CREB3L4  | 0.71662  | 0.407521 | 1.260167 | 0.247268 |
| EFNA3    | 46.11201 | 2.760686 | 770.2133 | 0.007657 |
| AQP10    | 1.142199 | 0.756682 | 1.724132 | 0.526831 |
| GATAD2B  | 1.57012  | 0.822243 | 2.998234 | 0.17164  |
| ILF2     | 0.527834 | 0.282527 | 0.986132 | 0.045096 |
| RIT1     | 0.96449  | 0.303429 | 3.065763 | 0.951139 |
| INTS3    | 0.814578 | 0.334356 | 1.984524 | 0.651698 |
| PKLR     | 0.129927 | 0.020228 | 0.834521 | 0.031508 |

|                      |          |          |          |          |
|----------------------|----------|----------|----------|----------|
| HCN3                 | 0.783011 | 0.20098  | 3.050585 | 0.724438 |
| ACTA1                | 0.06278  | 0.006224 | 0.633293 | 0.018908 |
| GALNT2               | 2.310092 | 0.812972 | 6.56422  | 0.116097 |
| TTC13                | 0.258563 | 0.07063  | 0.946545 | 0.041058 |
| SCCPDH               | 0.448438 | 0.255787 | 0.786188 | 0.005114 |
| LYST                 | 1.805551 | 0.758029 | 4.300645 | 0.182091 |
| CEP170               | 0.46276  | 0.139184 | 1.538587 | 0.208733 |
| ACP1                 | 0.662325 | 0.312478 | 1.403857 | 0.282411 |
| SNAP47               | 1.754096 | 0.710106 | 4.332947 | 0.223233 |
| SRP9                 | 0.280289 | 0.086691 | 0.906234 | 0.033636 |
| NVL                  | 0.164856 | 0.029398 | 0.924451 | 0.040436 |
| DEGS1                | 1.339954 | 0.722318 | 2.485715 | 0.353306 |
| FBXO28               | 0.914358 | 0.393643 | 2.123878 | 0.835058 |
| ARF1                 | 5.680619 | 1.132594 | 28.49161 | 0.034747 |
| CNIH4                | 1.373011 | 0.913248 | 2.064235 | 0.127568 |
| ITPKB                | 1.717925 | 0.893547 | 3.302864 | 0.104701 |
| GUK1                 | 1.266332 | 0.803484 | 1.995802 | 0.309008 |
| CDC42BP <sup>A</sup> | 0.5363   | 0.057786 | 4.977326 | 0.583612 |
| CNIH3                | 0.136747 | 0.010249 | 1.824514 | 0.132301 |
| MBOAT2               | 1.235496 | 0.676717 | 2.25567  | 0.491117 |
| PARP1                | 0.771323 | 0.408737 | 1.455555 | 0.422915 |
| PYCR2                | 2.241451 | 0.925521 | 5.428406 | 0.073702 |
| LBR                  | 0.594826 | 0.233848 | 1.513027 | 0.275453 |
| WNT9A                | 0.190064 | 0.003995 | 9.042846 | 0.39947  |
| EPHX1                | 1.859088 | 1.222931 | 2.826169 | 0.003711 |
| REN                  | 0.916555 | 0.494336 | 1.699399 | 0.782084 |
| SOX13                | 0.534657 | 0.224357 | 1.274122 | 0.157601 |
| ETNK2                | 1.920908 | 0.37659  | 9.798157 | 0.432315 |
| PPFIA4               | 0.840354 | 0.206978 | 3.411931 | 0.80778  |
| PLEKHA6              | 1.727986 | 0.769337 | 3.88118  | 0.185234 |
| PTPN7                | 0.398254 | 0.124179 | 1.277236 | 0.121522 |
| SYT2                 | 1.601488 | 0.179897 | 14.25683 | 0.672894 |
| ARL8A                | 0.124431 | 0.017484 | 0.885551 | 0.037401 |
| GDF7                 | 0.166263 | 0.021218 | 1.302825 | 0.087614 |
| PDIA6                | 0.637547 | 0.294004 | 1.382519 | 0.254376 |
| RHOB                 | 1.295403 | 1.01296  | 1.656599 | 0.039153 |
| ATP6V1C2             | 9.915051 | 0.428855 | 229.2342 | 0.152254 |
| GALM                 | 1.119407 | 0.604526 | 2.072817 | 0.719717 |
| EML4                 | 1.196473 | 0.733494 | 1.951683 | 0.472445 |
| CALM2                | 1.258844 | 0.524045 | 3.023953 | 0.60668  |
| CHAC2                | 0.791466 | 0.353126 | 1.773925 | 0.570068 |
| RPS27A               | 0.864805 | 0.265085 | 2.821309 | 0.809741 |
| VPS54                | 0.273845 | 0.08147  | 0.920478 | 0.036267 |
| ASXL2                | 0.547083 | 0.286677 | 1.044034 | 0.067359 |
| ETAA1                | 1.121935 | 0.250225 | 5.030418 | 0.880536 |
| SNRPG                | 1.127905 | 0.578345 | 2.199675 | 0.723953 |
| ABHD1                | 2.990411 | 0.521633 | 17.14339 | 0.218882 |
| MEIS1                | 1.185381 | 0.890758 | 1.577451 | 0.243419 |
| CIAO1                | 0.528805 | 0.237849 | 1.175685 | 0.118068 |
| ZNF514               | 0.690097 | 0.318792 | 1.493869 | 0.346527 |
| SNRNP20C             | 0.411954 | 0.180682 | 0.939252 | 0.034944 |
| MRPS5                | 2.016625 | 0.620918 | 6.549614 | 0.243188 |
| ANKRD53              | 1.048081 | 0.317184 | 3.46321  | 0.938618 |
| TPRKB                | 0.991378 | 0.530334 | 1.853228 | 0.978355 |
| EXOC6B               | 3.294904 | 0.140979 | 77.00738 | 0.458359 |
| SFXN5                | 0.767216 | 0.358463 | 1.642066 | 0.494904 |
| TEX261               | 0.830658 | 0.266323 | 2.590813 | 0.749206 |
| DQX1                 | 0.035036 | 0.001098 | 1.118194 | 0.057863 |

|          |          |          |          |          |
|----------|----------|----------|----------|----------|
| DUSP11   | 1.832573 | 0.814616 | 4.122584 | 0.143113 |
| ST6GAL2  | 0.423178 | 0.032011 | 5.594373 | 0.513849 |
| THNSL2   | 0.704273 | 0.14539  | 3.411526 | 0.663184 |
| RALB     | 0.885058 | 0.470494 | 1.664902 | 0.704878 |
| TMEM177  | 1.691236 | 0.919006 | 3.112365 | 0.091307 |
| RABL2A   | 0.729922 | 0.196665 | 2.709102 | 0.637997 |
| SLC20A1  | 1.091225 | 0.608863 | 1.955732 | 0.769323 |
| FBLN7    | 1.097912 | 0.236695 | 5.092668 | 0.905023 |
| ZC3H8    | 0.279232 | 0.117403 | 0.664125 | 0.003904 |
| LIPT1    | 0.566761 | 0.174005 | 1.846034 | 0.345961 |
| FAHD2B   | 1.507923 | 0.709333 | 3.205594 | 0.285774 |
| LYG1     | 0.320873 | 0.092552 | 1.112449 | 0.073138 |
| AFF3     | 0.941484 | 0.45904  | 1.930972 | 0.869319 |
| UBXN4    | 0.67711  | 0.330558 | 1.386984 | 0.286516 |
| SPOPL    | 0.905405 | 0.446597 | 1.835567 | 0.782863 |
| POLR2D   | 0.311185 | 0.12298  | 0.787418 | 0.013719 |
| AMMECR1  | 0.82131  | 0.291533 | 2.3138   | 0.709511 |
| PKP4     | 0.574446 | 0.227678 | 1.449367 | 0.240397 |
| SCRN3    | 0.538097 | 0.085722 | 3.377752 | 0.508468 |
| CDC47    | 0.631493 | 0.410243 | 0.972066 | 0.036735 |
| DLX1     | 0.739629 | 0.137239 | 3.986107 | 0.72563  |
| UBR3     | 0.416145 | 0.183349 | 0.944518 | 0.036042 |
| PHOSPHO  | 1.359388 | 0.435031 | 4.247824 | 0.597384 |
| FAM171B  | 0.591634 | 0.029684 | 11.79184 | 0.731003 |
| HSPD1    | 0.247657 | 0.071523 | 0.857541 | 0.027631 |
| CCDC150  | 0.072163 | 0.00691  | 0.753626 | 0.028072 |
| PTH2R    | 0.923069 | 0.66948  | 1.272712 | 0.625215 |
| NBEAL1   | 1.628144 | 0.174992 | 15.14841 | 0.668412 |
| SPAG16   | 0.331793 | 0.062856 | 1.751422 | 0.193695 |
| SUMF1    | 0.447781 | 0.200785 | 0.998619 | 0.049606 |
| RHBDD1   | 0.778512 | 0.203499 | 2.9783   | 0.714561 |
| HES6     | 0.75083  | 0.563282 | 1.000823 | 0.050659 |
| ANKMY1   | 0.095443 | 0.02072  | 0.439632 | 0.002574 |
| COPS7B   | 0.242804 | 0.110185 | 0.535043 | 0.000446 |
| DIS3L2   | 1.492874 | 0.327361 | 6.808004 | 0.604756 |
| CPNE9    | 0.528762 | 0.069718 | 4.010304 | 0.537616 |
| FANCD2   | 0.094096 | 0.028794 | 0.307492 | 9.16E-05 |
| VGLL4    | 1.119603 | 0.573846 | 2.184404 | 0.740424 |
| RAB5A    | 0.684505 | 0.346118 | 1.353723 | 0.275938 |
| CTDSP1   | 1.710637 | 0.857814 | 3.41132  | 0.127392 |
| STK11IP  | 1.36055  | 0.60146  | 3.077669 | 0.459745 |
| GMPPA    | 1.221661 | 0.324805 | 4.594937 | 0.767067 |
| EAF1     | 1.021984 | 0.534947 | 1.952441 | 0.947503 |
| CNTN4    | 0.008503 | 0.000203 | 0.356563 | 0.012386 |
| DYNC1LI1 | 1.159058 | 0.621973 | 2.159925 | 0.642094 |
| OSBPL10  | 0.746067 | 0.253981 | 2.191567 | 0.594153 |
| SLC25A38 | 0.430416 | 0.205023 | 0.903596 | 0.025889 |
| ITGA9    | 1.105405 | 0.722678 | 1.690825 | 0.643979 |
| GOLGA4   | 0.65969  | 0.216278 | 2.012185 | 0.464724 |
| CTDSPL   | 1.381001 | 1.019325 | 1.871006 | 0.037205 |
| STAC     | 1.731918 | 0.21153  | 14.18019 | 0.608674 |
| IQSEC1   | 1.225754 | 0.843516 | 1.781203 | 0.285742 |
| CAND2    | 3.242283 | 0.636492 | 16.51616 | 0.156753 |
| RPL32    | 0.354693 | 0.092056 | 1.366639 | 0.132043 |
| PTPRG    | 2.774201 | 0.68152  | 11.29269 | 0.154266 |
| SHQ1     | 0.80796  | 0.327432 | 1.993698 | 0.643563 |
| SLC25A26 | 0.277542 | 0.082494 | 0.933763 | 0.038389 |
| UBA3     | 0.964278 | 0.556497 | 1.670866 | 0.896809 |

|         |          |          |          |          |
|---------|----------|----------|----------|----------|
| ARL6IP5 | 1.09678  | 0.623402 | 1.929619 | 0.748596 |
| TMF1    | 0.790348 | 0.249457 | 2.504041 | 0.68924  |
| LRIG1   | 0.92407  | 0.583338 | 1.463825 | 0.736531 |
| LIMD1   | 0.397507 | 0.022251 | 7.101396 | 0.53052  |
| ZNF660  | 1.046425 | 0.266507 | 4.108731 | 0.948151 |
| NFKBIZ  | 1.005724 | 0.69186  | 1.461972 | 0.976144 |
| MYH15   | 9.89595  | 1.080355 | 90.64599 | 0.042524 |
| PHLDB2  | 0.412193 | 0.01655  | 10.2662  | 0.589008 |
| ABHD10  | 0.752022 | 0.384614 | 1.470402 | 0.404827 |
| PLA1A   | 2.518732 | 0.815807 | 7.776365 | 0.108268 |
| RABL3   | 1.570775 | 0.589042 | 4.188725 | 0.366866 |
| ADPRH   | 2.280264 | 1.092732 | 4.758352 | 0.028074 |
| ATG3    | 0.642568 | 0.317394 | 1.300886 | 0.219067 |
| NR1I2   | 1.280003 | 0.144609 | 11.32994 | 0.824403 |
| SRPRB   | 0.515261 | 0.2531   | 1.048969 | 0.067526 |
| AGTR1   | 3.398318 | 0.184043 | 62.74923 | 0.410932 |
| MED12L  | 0.446505 | 0.068522 | 2.909542 | 0.399141 |
| EIF2A   | 0.712533 | 0.384425 | 1.320681 | 0.2817   |
| OSBPL11 | 1.365747 | 0.828405 | 2.251632 | 0.221723 |
| TRPC1   | 0.754119 | 0.166823 | 3.408984 | 0.713892 |
| LPP     | 1.163363 | 0.724066 | 1.869184 | 0.531689 |
| TMEM44  | 0.460266 | 0.260218 | 0.814106 | 0.007658 |
| AMT     | 0.554011 | 0.326932 | 0.938813 | 0.028193 |
| TCTA    | 0.94859  | 0.373674 | 2.408044 | 0.911585 |
| UCN2    | 0.628411 | 0.048918 | 8.072695 | 0.72136  |
| STXBP5L | 0.601251 | 0.070765 | 5.108488 | 0.641201 |
| EAF2    | 0.768341 | 0.436422 | 1.352699 | 0.361169 |
| ILDR1   | 1.770112 | 0.165875 | 18.88953 | 0.636405 |
| TM4SF19 | 8.348233 | 0.049177 | 1417.201 | 0.417908 |
| EIF2B5  | 0.40122  | 0.199115 | 0.808465 | 0.010626 |
| DGKQ    | 1.00204  | 0.569141 | 1.764211 | 0.994365 |
| FIP1L1  | 0.387826 | 0.111818 | 1.345126 | 0.135511 |
| SLC26A1 | 0.106866 | 0.000483 | 23.63508 | 0.416907 |
| LYAR    | 0.326554 | 0.153281 | 0.6957   | 0.003729 |
| ATP10D  | 0.212948 | 0.025685 | 1.765525 | 0.151794 |
| OCIAD2  | 0.663457 | 0.439605 | 1.001298 | 0.050726 |
| SLC10A4 | 0.24346  | 0.043118 | 1.374651 | 0.109671 |
| SCD5    | 1.934648 | 0.53313  | 7.020547 | 0.315619 |
| PLAC8   | 0.862726 | 0.503632 | 1.477857 | 0.590801 |
| ENOPH1  | 0.285787 | 0.128809 | 0.634071 | 0.002067 |
| KLHL8   | 0.539496 | 0.270917 | 1.074338 | 0.079099 |
| SNCA    | 1.006825 | 0.798065 | 1.270192 | 0.954252 |
| CAMK2D  | 2.3421   | 0.243564 | 22.52149 | 0.461154 |
| CISD2   | 0.911171 | 0.450782 | 1.841759 | 0.795574 |
| DDIT4L  | 0.889913 | 0.615046 | 1.287621 | 0.536064 |
| TIFA    | 1.146019 | 0.284176 | 4.621634 | 0.848082 |
| SPATA5  | 0.267029 | 0.009051 | 7.877883 | 0.444479 |
| CCNA2   | 0.828843 | 0.525557 | 1.307146 | 0.419302 |
| METTL14 | 0.406481 | 0.13912  | 1.187662 | 0.099851 |
| USP53   | 0.264818 | 0.030687 | 2.285258 | 0.226912 |
| SETD7   | 0.121064 | 0.014341 | 1.021975 | 0.052381 |
| NAF1    | 0.914778 | 0.247771 | 3.377384 | 0.893672 |
| SFRP2   | 1.153665 | 0.214112 | 6.216111 | 0.867882 |
| RPS3A   | 0.056306 | 0.008205 | 0.386402 | 0.003416 |
| RNF175  | 0.551645 | 0.242601 | 1.254372 | 0.155829 |
| PDGFC   | 1.010013 | 0.595074 | 1.714285 | 0.970556 |
| CBR4    | 0.531089 | 0.268943 | 1.048752 | 0.068326 |
| CYP4V2  | 1.379606 | 0.856919 | 2.221111 | 0.185356 |

|          |          |          |          |          |
|----------|----------|----------|----------|----------|
| ROPN1L   | 0.770849 | 0.457894 | 1.297698 | 0.3274   |
| NDUFS6   | 2.58828  | 0.164509 | 40.72221 | 0.498809 |
| NKD2     | 0.967906 | 0.706216 | 1.326568 | 0.839271 |
| SRD5A1   | 1.631879 | 0.728193 | 3.657037 | 0.234231 |
| MYO10    | 3.938422 | 0.608535 | 25.48938 | 0.150246 |
| RPL37    | 0.545207 | 0.186273 | 1.595784 | 0.268283 |
| SKP2     | 0.157908 | 0.037423 | 0.666296 | 0.011981 |
| OSMR     | 0.178567 | 0.009903 | 3.219935 | 0.243006 |
| PLK2     | 0.990249 | 0.31539  | 3.109148 | 0.986608 |
| GZMA     | 0.932776 | 0.70605  | 1.232308 | 0.624287 |
| PIK3R1   | 0.351237 | 0.092435 | 1.334637 | 0.1245   |
| LHFPL2   | 0.888146 | 0.665341 | 1.185561 | 0.420866 |
| SSBP2    | 0.764547 | 0.482355 | 1.21183  | 0.253286 |
| IQGAP2   | 1.253337 | 0.667771 | 2.352383 | 0.4821   |
| CRHBP    | 1.580617 | 1.002143 | 2.493007 | 0.048933 |
| RASA1    | 0.445822 | 0.077587 | 2.561743 | 0.365189 |
| LIX1     | 0.758876 | 0.096237 | 5.984135 | 0.793415 |
| GIN1     | 2.596293 | 0.683277 | 9.865315 | 0.161277 |
| PAM      | 0.852398 | 0.620797 | 1.170403 | 0.323517 |
| BDP1     | 0.439605 | 0.10984  | 1.759403 | 0.245432 |
| GTF2H2   | 1.363534 | 0.541424 | 3.433953 | 0.510542 |
| SLC30A5  | 0.250513 | 0.054618 | 1.149024 | 0.074877 |
| BTF3     | 0.219411 | 0.07843  | 0.613813 | 0.003855 |
| FBXL17   | 0.799847 | 0.377047 | 1.696754 | 0.560537 |
| SPATA9   | 0.263771 | 0.01573  | 4.42307  | 0.354238 |
| TNFAIP8  | 0.773976 | 0.232677 | 2.574555 | 0.676081 |
| FEM1C    | 0.647879 | 0.37167  | 1.129354 | 0.12579  |
| COMMD10  | 1.335466 | 0.764602 | 2.332546 | 0.309308 |
| ATG12    | 0.27819  | 0.107387 | 0.720664 | 0.008427 |
| MEGF10   | 0.749159 | 0.074596 | 7.523703 | 0.806167 |
| YIPF5    | 1.496817 | 0.49687  | 4.509148 | 0.473458 |
| ARHGAP20 | 0.870345 | 0.325006 | 2.33073  | 0.782316 |
| DDX46    | 0.442246 | 0.2418   | 0.808856 | 0.008082 |
| TIMD4    | 1.160933 | 0.699134 | 1.927765 | 0.564131 |
| RNF145   | 1.220916 | 0.629935 | 2.36633  | 0.554396 |
| FBXO38   | 0.472519 | 0.196656 | 1.135357 | 0.093712 |
| PCYOX1L  | 0.996448 | 0.502282 | 1.976795 | 0.991877 |
| TNIP1    | 2.128016 | 0.835982 | 5.416926 | 0.113157 |
| G3BP1    | 0.987827 | 0.481788 | 2.025374 | 0.973329 |
| ZNF300   | 0.401218 | 0.079892 | 2.014907 | 0.267374 |
| N4BP3    | 1.998537 | 0.111654 | 35.77262 | 0.638041 |
| NHP2     | 0.582156 | 0.294531 | 1.150662 | 0.119643 |
| RMND5B   | 1.367308 | 0.655794 | 2.850793 | 0.40399  |
| KCNMB1   | 1.21733  | 0.850304 | 1.742781 | 0.282732 |
| FAM50B   | 1.237722 | 0.783817 | 1.954482 | 0.360207 |
| MYLK4    | 0.57915  | 0.269075 | 1.246549 | 0.162563 |
| TBC1D7   | 0.357149 | 0.144045 | 0.885523 | 0.026257 |
| FARS2    | 1.085196 | 0.5296   | 2.223661 | 0.823245 |
| GFOD1    | 1.354535 | 0.911705 | 2.012456 | 0.133012 |
| CDKAL1   | 0.809992 | 0.301145 | 2.178639 | 0.676359 |
| PSD2     | 0.197276 | 0.034447 | 1.129768 | 0.068313 |
| LRRTM2   | 0.027623 | 0.002095 | 0.364266 | 0.006384 |
| ZMAT2    | 0.454868 | 0.153928 | 1.344162 | 0.154172 |
| GFRA3    | 0.710486 | 0.032889 | 15.34832 | 0.827415 |
| KLHL3    | 0.917622 | 0.493546 | 1.706085 | 0.785857 |
| TRIM7    | 5.482945 | 1.163654 | 25.83473 | 0.031428 |
| TRIM41   | 1.914411 | 0.550093 | 6.662456 | 0.307424 |
| HIGD2A   | 2.918121 | 1.124933 | 7.569717 | 0.027664 |

|          |          |          |          |          |
|----------|----------|----------|----------|----------|
| FAM193B  | 1.225992 | 0.147735 | 10.17399 | 0.850314 |
| PLA2G7   | 1.415268 | 0.909427 | 2.202467 | 0.123751 |
| TNFRSF21 | 1.0869   | 0.789692 | 1.495965 | 0.609158 |
| RNF44    | 0.71689  | 0.292841 | 1.754984 | 0.466226 |
| DOK3     | 1.062972 | 0.664762 | 1.699721 | 0.798729 |
| ABT1     | 0.552592 | 0.110653 | 2.759595 | 0.469764 |
| DAAM2    | 0.104741 | 0.012039 | 0.911248 | 0.040937 |
| PRIM2    | 0.811962 | 0.429918 | 1.533507 | 0.52083  |
| FGD2     | 1.334219 | 0.938015 | 1.897775 | 0.108713 |
| SCUBE3   | 0.324406 | 0.019964 | 5.27149  | 0.428718 |
| ANO7     | 0.907728 | 0.05719  | 14.40762 | 0.94528  |
| CRIP3    | 2.830737 | 0.343589 | 23.32166 | 0.333506 |
| TCTE1    | 0.376967 | 0.03474  | 4.090563 | 0.422567 |
| RPL7L1   | 0.49634  | 0.234254 | 1.051648 | 0.067473 |
| NFKBIE   | 1.392871 | 0.770125 | 2.51919  | 0.273071 |
| TPBG     | 1.112324 | 0.531481 | 2.327955 | 0.777556 |
| IRAK1BP1 | 1.014924 | 0.519234 | 1.983828 | 0.965445 |
| PHIP     | 0.741358 | 0.464859 | 1.18232  | 0.208865 |
| PNRC1    | 0.902832 | 0.354716 | 2.29791  | 0.830195 |
| PM20D2   | 0.607786 | 0.393406 | 0.938989 | 0.024857 |
| RARS2    | 0.486197 | 0.194782 | 1.2136   | 0.122307 |
| SCML4    | 0.787364 | 0.103178 | 6.008466 | 0.817654 |
| RNF217   | 1.111789 | 0.701374 | 1.762361 | 0.6521   |
| ARHGAP18 | 1.111861 | 0.491971 | 2.512816 | 0.798813 |
| SHPRH    | 0.0943   | 0.018286 | 0.486296 | 0.004782 |
| AIG1     | 0.514946 | 0.32904  | 0.805886 | 0.00368  |
| DYNLT1   | 1.486771 | 0.810517 | 2.727259 | 0.200098 |
| TIAM2    | 3.166929 | 0.332916 | 30.12603 | 0.315864 |
| TMEM181  | 0.866753 | 0.426565 | 1.761187 | 0.692607 |
| PNLDC1   | 0.215289 | 0.049919 | 0.928484 | 0.039449 |
| WTAP     | 0.227284 | 0.043541 | 1.186427 | 0.078882 |
| ZMYM4    | 0.752787 | 0.366857 | 1.544713 | 0.438752 |
| VWDE     | 5.581061 | 0.332823 | 93.58797 | 0.232005 |
| GNA12    | 2.709017 | 1.414679 | 5.187589 | 0.002643 |
| SDK1     | 1.043912 | 0.037765 | 28.8564  | 0.979755 |
| WASH2P   | 1.64894  | 0.751223 | 3.619436 | 0.212459 |
| RBAK     | 0.919425 | 0.193011 | 4.379752 | 0.915996 |
| CREB5    | 1.498618 | 0.537706 | 4.17674  | 0.43919  |
| CDCA5    | 0.703367 | 0.469743 | 1.053183 | 0.087564 |
| IGFBP3   | 3.227075 | 0.690246 | 15.0874  | 0.136524 |
| PURB     | 0.674468 | 0.37282  | 1.220178 | 0.192897 |
| MDH2     | 1.186205 | 0.359346 | 3.915673 | 0.779286 |
| POMZP3   | 1.085601 | 0.537859 | 2.191148 | 0.818698 |
| CCT6A    | 0.354952 | 0.128525 | 0.980278 | 0.045674 |
| PSPH     | 0.560022 | 0.196664 | 1.594722 | 0.277534 |
| ZNF92    | 1.341599 | 0.093781 | 19.1925  | 0.828619 |
| ATXN7L1  | 0.5578   | 0.077773 | 4.000641 | 0.56143  |
| TMEM168  | 0.686154 | 0.240356 | 1.958791 | 0.481584 |
| ASB15    | 0.544415 | 0.038269 | 7.744802 | 0.653535 |
| SLC12A9  | 1.571211 | 1.027685 | 2.402198 | 0.036975 |
| TRIM4    | 1.044972 | 0.327097 | 3.33835  | 0.940826 |
| MEPCE    | 0.876499 | 0.406232 | 1.891161 | 0.736896 |
| TMEM209  | 0.650427 | 0.319282 | 1.32502  | 0.236106 |
| AGBL3    | 2.180759 | 0.240307 | 19.79016 | 0.488392 |
| ZC3HAV1L | 0.046029 | 0.002925 | 0.724407 | 0.02858  |
| TMEM140  | 1.212632 | 0.810532 | 1.814212 | 0.34826  |
| TLK2     | 1.036046 | 0.379825 | 2.826017 | 0.944858 |
| EPHA1    | 1.014579 | 0.485814 | 2.118855 | 0.969271 |



|          |          |          |          |          |
|----------|----------|----------|----------|----------|
| NOM1     | 0.365004 | 0.036933 | 3.607309 | 0.388527 |
| NCAPG2   | 0.564283 | 0.284    | 1.12118  | 0.102376 |
| RAB19    | 3.176125 | 0.115664 | 87.21601 | 0.494137 |
| LUC7L2   | 0.233834 | 0.058635 | 0.932527 | 0.0395   |
| SH3KBP1  | 0.669226 | 0.257777 | 1.737405 | 0.409303 |
| LANCL3   | 0.407798 | 0.03587  | 4.636114 | 0.469543 |
| CASK     | 0.214495 | 0.051595 | 0.891708 | 0.034207 |
| SPIN2A   | 22.32252 | 1.425765 | 349.493  | 0.026919 |
| MSN      | 1.923506 | 0.788741 | 4.690859 | 0.150376 |
| HDAC8    | 0.322376 | 0.120272 | 0.864096 | 0.024428 |
| SLC16A2  | 0.821278 | 0.265396 | 2.541477 | 0.732639 |
| ZNF182   | 0.253728 | 0.053636 | 1.200276 | 0.083679 |
| CHST7    | 1.595912 | 1.045853 | 2.43527  | 0.030167 |
| NDUFB11  | 1.07503  | 0.548321 | 2.107687 | 0.833182 |
| ZNF41    | 0.014939 | 0.000111 | 2.009918 | 0.092794 |
| RAB41    | 0.115418 | 0.012801 | 1.040673 | 0.054301 |
| ZMYM3    | 0.685094 | 0.183068 | 2.563824 | 0.57433  |
| TAF1     | 0.758255 | 0.208254 | 2.760822 | 0.674689 |
| GPR174   | 0.377511 | 0.083291 | 1.711051 | 0.20645  |
| NONO     | 0.369214 | 0.140719 | 0.968732 | 0.042918 |
| CCDC120  | 0.753441 | 0.251469 | 2.257432 | 0.613097 |
| LPAR4    | 0.35778  | 0.193663 | 0.660976 | 0.001031 |
| EBP      | 0.966657 | 0.45577  | 2.050212 | 0.929556 |
| OGT      | 0.526305 | 0.272601 | 1.016127 | 0.055838 |
| SNX12    | 1.955225 | 0.662541 | 5.770063 | 0.224606 |
| ITGB1BP2 | 0.165643 | 0.015512 | 1.768829 | 0.13676  |
| IL2RG    | 0.948691 | 0.566386 | 1.589048 | 0.841369 |
| ZNF711   | 1.446091 | 0.547189 | 3.821675 | 0.456925 |
| DIAPH2   | 0.415436 | 0.132771 | 1.299885 | 0.131217 |
| NXF3     | 0.701273 | 0.407481 | 1.206886 | 0.20016  |
| PRPS1    | 0.27123  | 0.131045 | 0.561376 | 0.000439 |
| DOCK11   | 0.915962 | 0.552427 | 1.518727 | 0.73367  |
| IGSF1    | 0.083595 | 0.002558 | 2.731921 | 0.163005 |
| GPC3     | 1.535046 | 0.391128 | 6.024548 | 0.538997 |
| RBMX     | 0.711591 | 0.380485 | 1.330831 | 0.28678  |
| MCPH1    | 0.743099 | 0.267232 | 2.066357 | 0.569329 |
| MFHAS1   | 1.42112  | 0.83104  | 2.430184 | 0.19919  |
| FBXO25   | 7.698847 | 0.320978 | 184.6615 | 0.208029 |
| NSDHL    | 0.447627 | 0.169377 | 1.182982 | 0.105003 |
| ZNF185   | 0.993164 | 0.809165 | 1.219005 | 0.947686 |
| CETN2    | 0.395616 | 0.194297 | 0.805532 | 0.010587 |
| RPL10    | 0.351263 | 0.016078 | 7.674112 | 0.506124 |
| CSGALNA1 | 1.319633 | 0.778431 | 2.237104 | 0.303063 |
| ATP6V1B2 | 1.534209 | 0.868553 | 2.710022 | 0.140352 |
| CCDC25   | 0.959886 | 0.237688 | 3.876424 | 0.954158 |
| HMBOX1   | 0.789329 | 0.330217 | 1.88676  | 0.594671 |
| CHRNA6   | 0.810716 | 0.370623 | 1.773393 | 0.599282 |
| GNRH1    | 2.055805 | 0.500069 | 8.451499 | 0.31772  |
| BIN3     | 0.775916 | 0.365489 | 1.647233 | 0.508903 |
| DOK2     | 1.330744 | 0.942264 | 1.879387 | 0.104735 |
| SLC25A37 | 1.001092 | 0.751159 | 1.334186 | 0.994057 |
| CHMP7    | 6.565616 | 1.801594 | 23.92732 | 0.004342 |
| DOCK5    | 0.389093 | 0.145435 | 1.040965 | 0.060108 |
| STAR     | 0.373429 | 0.07186  | 1.940562 | 0.241402 |
| ERLIN2   | 0.763378 | 0.233219 | 2.498707 | 0.655391 |
| ST18     | 0.488916 | 0.1202   | 1.988676 | 0.317501 |
| RGS20    | 0.019369 | 0.000409 | 0.916805 | 0.045059 |
| TACC1    | 0.872311 | 0.507043 | 1.500712 | 0.621657 |

|          |          |          |          |          |
|----------|----------|----------|----------|----------|
| GOLGA7   | 0.247031 | 0.042201 | 1.44606  | 0.120935 |
| GIN54    | 0.186471 | 0.044621 | 0.779263 | 0.021347 |
| DNAJC5B  | 1.375586 | 0.179168 | 10.56122 | 0.75913  |
| ADHFE1   | 0.520902 | 0.223325 | 1.214996 | 0.131223 |
| MRPS28   | 1.405043 | 0.737164 | 2.678025 | 0.301442 |
| LACTB2   | 0.563709 | 0.280507 | 1.132833 | 0.107459 |
| TERF1    | 1.399346 | 0.278632 | 7.027804 | 0.683229 |
| RPL7     | 0.900063 | 0.533833 | 1.517543 | 0.69281  |
| ATP6V0D2 | 1.439239 | 0.149595 | 13.84682 | 0.752591 |
| MTDH     | 0.712015 | 0.346676 | 1.46236  | 0.354977 |
| LRP12    | 0.401447 | 0.052575 | 3.065353 | 0.378881 |
| EBAG9    | 0.279938 | 0.043834 | 1.78776  | 0.178352 |
| POLR2K   | 0.752914 | 0.326263 | 1.73749  | 0.505941 |
| EIF3H    | 0.485913 | 0.240021 | 0.983713 | 0.044899 |
| UTP23    | 1.076604 | 0.383551 | 3.021963 | 0.888526 |
| NDUFB9   | 1.03683  | 0.556677 | 1.93113  | 0.909254 |
| TATDN1   | 0.612602 | 0.279017 | 1.345012 | 0.221983 |
| FAM83A   | 1.62561  | 0.956435 | 2.762976 | 0.072594 |
| GSDMC    | 3.676633 | 0.803682 | 16.81962 | 0.093297 |
| ZNF7     | 0.588356 | 0.226192 | 1.530393 | 0.276808 |
| SLC39A4  | 0.304153 | 0.043721 | 2.11588  | 0.229108 |
| VLDLR    | 1.513016 | 0.605031 | 3.783641 | 0.375888 |
| AK3      | 0.393528 | 0.199134 | 0.777692 | 0.007288 |
| UHRF2    | 0.629996 | 0.360157 | 1.102003 | 0.105337 |
| NFIB     | 1.617203 | 0.506483 | 5.163735 | 0.417064 |
| PLIN2    | 0.696513 | 0.494297 | 0.981455 | 0.038739 |
| HAUS6    | 0.573112 | 0.047943 | 6.851016 | 0.660115 |
| CDKN2B   | 3.106362 | 0.79452  | 12.14505 | 0.103246 |
| CDKN2A   | 0.720529 | 0.346859 | 1.496754 | 0.379544 |
| IFNK     | 3.264764 | 0.298513 | 35.70593 | 0.33233  |
| ZCCHC7   | 0.73     | 0.367149 | 1.451452 | 0.369458 |
| FBXO10   | 0.792243 | 0.059138 | 10.61332 | 0.860376 |
| SIGMAR1  | 1.264683 | 0.564467 | 2.833508 | 0.56832  |
| CBWD5    | 0.623467 | 0.313757 | 1.238892 | 0.177489 |
| CEP78    | 0.25391  | 0.100821 | 0.639454 | 0.003628 |
| AUH      | 0.483214 | 0.136492 | 1.710684 | 0.259497 |
| ZNF462   | 2.31039  | 0.540514 | 9.875606 | 0.258531 |
| UGCG     | 1.048538 | 0.724032 | 1.518485 | 0.801925 |
| SNX30    | 0.786353 | 0.422902 | 1.462164 | 0.44757  |
| STOM     | 0.966923 | 0.680136 | 1.374638 | 0.851363 |
| GSN      | 1.680314 | 0.926286 | 3.048145 | 0.087643 |
| MRRF     | 0.178295 | 0.044303 | 0.717542 | 0.015216 |
| NR6A1    | 0.958285 | 0.033488 | 27.42182 | 0.980134 |
| CRB2     | 0.409789 | 0.019344 | 8.681042 | 0.566868 |
| ALAD     | 0.28377  | 0.072048 | 1.117659 | 0.071715 |
| WDR31    | 0.64335  | 0.051628 | 8.017011 | 0.731833 |
| POLE3    | 0.435902 | 0.200243 | 0.948899 | 0.036427 |
| SURF4    | 1.111587 | 0.512748 | 2.409809 | 0.788725 |
| GBGT1    | 0.794914 | 0.460107 | 1.373351 | 0.410657 |
| SURF1    | 1.718259 | 0.614696 | 4.803046 | 0.302018 |
| SURF2    | 2.522069 | 0.813981 | 7.814474 | 0.108878 |
| SURF6    | 0.801539 | 0.418034 | 1.536873 | 0.505373 |
| MED22    | 1.51762  | 0.530731 | 4.339619 | 0.436465 |
| REXO4    | 0.619944 | 0.348694 | 1.102201 | 0.103414 |
| RPL7A    | 0.613902 | 0.285476 | 1.320167 | 0.211678 |
| GTF3C5   | 0.745988 | 0.448584 | 1.240565 | 0.258785 |
| ASB6     | 0.976935 | 0.333352 | 2.863048 | 0.966071 |
| PTGES2   | 1.386088 | 0.734894 | 2.614312 | 0.313221 |

|          |          |          |          |          |
|----------|----------|----------|----------|----------|
| CIZ1     | 0.634289 | 0.12695  | 3.169133 | 0.579132 |
| SLC25A25 | 6.918372 | 1.633657 | 29.2986  | 0.008628 |
| SH3GLB2  | 1.018071 | 0.549739 | 1.885385 | 0.954573 |
| PTGES    | 0.778372 | 0.335473 | 1.805997 | 0.55959  |
| LCN2     | 0.908927 | 0.758954 | 1.088535 | 0.299314 |
| LRSAM1   | 0.427327 | 0.086456 | 2.112152 | 0.297021 |
| GPR107   | 1.262933 | 0.088308 | 18.06179 | 0.863454 |
| IDI2     | 0.493    | 0.071633 | 3.392957 | 0.472376 |
| INPP5E   | 1.182875 | 0.529532 | 2.642323 | 0.682125 |
| SEC16A   | 2.047279 | 0.999719 | 4.192529 | 0.05009  |
| NOTCH1   | 1.325088 | 0.765415 | 2.293995 | 0.314784 |
| NACC2    | 1.185478 | 0.805562 | 1.744569 | 0.388066 |
| USP6NL   | 0.329422 | 0.083739 | 1.295913 | 0.112055 |
| COMMD3   | 0.956011 | 0.493548 | 1.851811 | 0.89391  |
| MSRB2    | 0.569663 | 0.292993 | 1.107589 | 0.097168 |
| PDSS1    | 0.44654  | 0.152123 | 1.310767 | 0.142262 |
| FAM171A1 | 1.284675 | 0.982851 | 1.679186 | 0.066748 |
| RSU1     | 0.404871 | 0.147736 | 1.109552 | 0.078772 |
| ST8SIA6  | 1.243185 | 0.615174 | 2.512312 | 0.544231 |
| PARD3    | 0.863915 | 0.054112 | 13.79255 | 0.917575 |
| ZEB1     | 0.804454 | 0.110094 | 5.878127 | 0.830209 |
| NRBF2    | 2.427203 | 1.114842 | 5.28444  | 0.025495 |
| POLR3A   | 0.517112 | 0.216943 | 1.232604 | 0.136728 |
| HERC4    | 0.83436  | 0.302088 | 2.304478 | 0.726819 |
| CAMK2G   | 0.444674 | 0.209356 | 0.94449  | 0.034983 |
| GLUD1    | 1.149114 | 0.601887 | 2.193873 | 0.673566 |
| ANKRD1   | 3.562316 | 0.509908 | 24.88701 | 0.200234 |
| HTR7     | 1.433594 | 0.432098 | 4.756315 | 0.556103 |
| RPP30    | 0.04571  | 0.002976 | 0.70201  | 0.026841 |
| ADD3     | 0.919093 | 0.49751  | 1.69792  | 0.787612 |
| DNAJB12  | 4.676642 | 0.794925 | 27.51325 | 0.087985 |
| EIF4EBP2 | 1.058574 | 0.573304 | 1.954598 | 0.855643 |
| TCF7L2   | 1.711301 | 1.025799 | 2.8549   | 0.039637 |
| MKI67    | 0.875574 | 0.346972 | 2.209483 | 0.778438 |
| LRRC27   | 0.155196 | 0.012363 | 1.948214 | 0.148933 |
| MTG1     | 0.501381 | 0.178508 | 1.408242 | 0.190111 |
| NKX6-2   | 0.023059 | 0.001599 | 0.332542 | 0.00563  |
| PAOX     | 1.518314 | 0.707107 | 3.260155 | 0.284139 |
| GSTO1    | 0.565988 | 0.257234 | 1.245334 | 0.15717  |
| TAF5     | 0.743311 | 0.321885 | 1.716486 | 0.487245 |
| PPRC1    | 0.643032 | 0.299493 | 1.380635 | 0.257372 |
| ITPRIP   | 1.096608 | 0.758119 | 1.586227 | 0.624374 |
| CNNM2    | 0.509128 | 0.084703 | 3.060223 | 0.460701 |
| PDCD11   | 0.506225 | 0.126294 | 2.029108 | 0.336527 |
| RGS10    | 1.127484 | 0.785347 | 1.618673 | 0.515475 |
| BTBD10   | 1.534407 | 0.707551 | 3.327542 | 0.278346 |
| ADM      | 1.192585 | 0.958755 | 1.483444 | 0.113717 |
| GAS2     | 1.594955 | 0.525009 | 4.845405 | 0.410254 |
| LIN7C    | 0.721998 | 0.325853 | 1.599741 | 0.422281 |
| IMMP1L   | 0.266731 | 0.050537 | 1.4078   | 0.119473 |
| TUT1     | 1.03505  | 0.494342 | 2.167179 | 0.927199 |
| SCGB1A1  | 1.09097  | 0.052132 | 22.83099 | 0.95525  |
| HSD17B12 | 0.758926 | 0.363874 | 1.58288  | 0.46204  |
| APIP     | 0.241743 | 0.085045 | 0.687166 | 0.007725 |
| DGKZ     | 1.870694 | 0.10084  | 34.70346 | 0.674255 |
| EIF3M    | 0.822905 | 0.411955 | 1.643801 | 0.580866 |
| TNKS1BP1 | 1.797971 | 0.510241 | 6.335629 | 0.361293 |
| SERPING1 | 1.861253 | 0.974148 | 3.5562   | 0.060016 |

|          |          |          |          |          |
|----------|----------|----------|----------|----------|
| SSRP1    | 0.315481 | 0.100174 | 0.993552 | 0.048722 |
| SLC43A1  | 1.125682 | 0.33717  | 3.758222 | 0.847371 |
| PTPRJ    | 1.790175 | 0.548964 | 5.837775 | 0.33427  |
| ARFGAP2  | 0.755128 | 0.364952 | 1.562447 | 0.449    |
| CCDC81   | 1.185287 | 0.400063 | 3.511713 | 0.759036 |
| SESN3    | 1.138236 | 0.712261 | 1.81897  | 0.588273 |
| ENDOD1   | 0.880359 | 0.528097 | 1.467595 | 0.625057 |
| CCDC82   | 0.896917 | 0.121224 | 6.636141 | 0.915151 |
| KLHL35   | 0.890757 | 0.335522 | 2.364815 | 0.816367 |
| SERPINH1 | 1.482399 | 0.977883 | 2.247208 | 0.063653 |
| CAPN5    | 1.634033 | 0.739037 | 3.612896 | 0.22514  |
| INTS4    | 0.110272 | 0.014135 | 0.860237 | 0.035413 |
| PAK1     | 1.181419 | 0.81651  | 1.70941  | 0.376435 |
| RPS3     | 0.722551 | 0.283023 | 1.844657 | 0.496784 |
| ZC3H12C  | 1.248907 | 0.684979 | 2.277105 | 0.46827  |
| TTC12    | 2.209603 | 0.582508 | 8.381601 | 0.243814 |
| NCAM1    | 0.084238 | 0.006678 | 1.062615 | 0.055747 |
| NPAT     | 1.168114 | 0.419575 | 3.25208  | 0.766124 |
| ATM      | 0.776861 | 0.258641 | 2.333403 | 0.652737 |
| AASDHPP  | 1.03859  | 0.439127 | 2.456395 | 0.931299 |
| GLB1L2   | 1.621552 | 0.718361 | 3.660321 | 0.244562 |
| P4HA3    | 0.050287 | 0.002605 | 0.970891 | 0.047757 |
| ST14     | 1.398173 | 0.887376 | 2.202997 | 0.148494 |
| HYOU1    | 2.473281 | 1.176175 | 5.200857 | 0.016947 |
| MTA2     | 0.494358 | 0.239911 | 1.018671 | 0.056157 |
| TMEM138  | 0.274472 | 0.098945 | 0.761382 | 0.013004 |
| FADS1    | 1.327173 | 0.812903 | 2.166788 | 0.257746 |
| ROM1     | 0.868935 | 0.221437 | 3.409758 | 0.84038  |
| EML3     | 0.881099 | 0.463772 | 1.673961 | 0.699063 |
| INCENP   | 0.587668 | 0.120355 | 2.869466 | 0.511146 |
| ZP1      | 0.120548 | 0.00523  | 2.778351 | 0.18629  |
| MS4A3    | 1.018461 | 0.83094  | 1.2483   | 0.860148 |
| PLCH2    | 1.256372 | 0.547618 | 2.88243  | 0.590111 |
| MS4A2    | 0.870912 | 0.443355 | 1.710788 | 0.688253 |
| B3GAT3   | 2.275284 | 0.940177 | 5.506321 | 0.068279 |
| EI24     | 1.432095 | 0.585991 | 3.499875 | 0.43086  |
| CCDC15   | 0.891723 | 0.29004  | 2.741587 | 0.841492 |
| CHEK1    | 0.374314 | 0.211203 | 0.663395 | 0.000764 |
| FEZ1     | 1.078021 | 0.530271 | 2.191579 | 0.83559  |
| ESAM     | 1.293875 | 0.978768 | 1.710429 | 0.070411 |
| KIRREL3  | 0.262924 | 0.034355 | 2.012216 | 0.19825  |
| MPZL2    | 2.628929 | 1.009383 | 6.84702  | 0.047806 |
| SIDT2    | 1.340673 | 0.912703 | 1.969319 | 0.135082 |
| TMEM25   | 1.78165  | 0.732419 | 4.333964 | 0.202885 |
| TAGLN    | 1.60844  | 0.65043  | 3.977495 | 0.303553 |
| DUSP15   | 27.05434 | 1.285479 | 569.3889 | 0.033878 |
| COMMD7   | 0.723806 | 0.30936  | 1.693482 | 0.456087 |
| DSN1     | 0.407615 | 0.171547 | 0.968536 | 0.042117 |
| LSM14B   | 0.520471 | 0.231708 | 1.169103 | 0.113748 |
| YTHDF1   | 1.255646 | 0.35865  | 4.396054 | 0.721782 |
| CABLES2  | 0.852616 | 0.336745 | 2.158766 | 0.73657  |
| GPHA2    | 0.076934 | 0.005545 | 1.067508 | 0.055968 |
| TRPT1    | 0.214617 | 0.041206 | 1.117804 | 0.067595 |
| NUDT22   | 1.775184 | 0.8538   | 3.690882 | 0.124358 |
| FERMT3   | 1.96481  | 1.003012 | 3.848886 | 0.048984 |
| PLCB3    | 18.73093 | 1.332582 | 263.2842 | 0.02979  |
| MRPL49   | 1.077846 | 0.451544 | 2.572842 | 0.865896 |
| FAU      | 5.990738 | 1.091032 | 32.8945  | 0.039377 |

|          |          |          |          |          |
|----------|----------|----------|----------|----------|
| TM7SF2   | 1.52027  | 0.91202  | 2.534178 | 0.108115 |
| TBX6     | 0.336102 | 0.003976 | 28.41253 | 0.630076 |
| PPP4C    | 0.996036 | 0.32204  | 3.080635 | 0.994499 |
| ALDOA    | 2.504621 | 0.792021 | 7.9204   | 0.118047 |
| DOC2A    | 1.463196 | 0.442837 | 4.834605 | 0.532508 |
| HIRIP3   | 0.44264  | 0.228986 | 0.855642 | 0.015368 |
| TAOK2    | 2.259148 | 0.427971 | 11.92547 | 0.336993 |
| TMEM219  | 3.488323 | 1.601763 | 7.596879 | 0.001653 |
| HMGA2    | 4.479217 | 0.175153 | 114.548  | 0.364605 |
| CNKSR2   | 0.872985 | 0.072862 | 10.45953 | 0.914624 |
| KLRF1    | 1.119096 | 0.719537 | 1.740531 | 0.617548 |
| MKX      | 9.841221 | 0.95607  | 101.2997 | 0.054581 |
| MPP7     | 0.78563  | 0.299292 | 2.062248 | 0.624137 |
| ITGB1    | 1.268721 | 0.415294 | 3.875935 | 0.676159 |
| CTF1     | 0.663895 | 0.164969 | 2.671748 | 0.564197 |
| CWC15    | 0.370673 | 0.163147 | 0.842177 | 0.017779 |
| FCGR1A   | 1.042486 | 0.781624 | 1.390407 | 0.777046 |
| ARID5B   | 1.456133 | 0.925232 | 2.291665 | 0.104353 |
| DCUN1D2  | 0.27284  | 0.043697 | 1.703575 | 0.164559 |
| TMCO3    | 0.563286 | 0.319838 | 0.992036 | 0.04685  |
| TMEM218  | 0.520359 | 0.136744 | 1.980152 | 0.338048 |
| TIRAP    | 4.096717 | 0.23063  | 72.77056 | 0.336728 |
| LATS2    | 1.287468 | 0.566698 | 2.924969 | 0.546174 |
| SAP18    | 0.858308 | 0.406588 | 1.811892 | 0.688564 |
| KIAA1328 | 0.415559 | 0.121492 | 1.421401 | 0.161654 |
| FAM124A  | 0.937677 | 0.072869 | 12.06604 | 0.960626 |
| MIA2     | 12.31968 | 0.324844 | 467.2227 | 0.175803 |
| HNMT     | 1.496067 | 0.885122 | 2.528711 | 0.132509 |
| PDCD4    | 0.362028 | 0.167225 | 0.78376  | 0.00993  |
| ADRA2A   | 1.702763 | 0.494953 | 5.857934 | 0.39849  |
| WDR17    | 0.032312 | 0.00072  | 1.450337 | 0.076993 |
| CCDC102E | 0.822511 | 0.039653 | 17.06109 | 0.899495 |
| CD226    | 0.883428 | 0.355384 | 2.196061 | 0.789641 |
| FSIP1    | 4.401154 | 0.977781 | 19.81032 | 0.053521 |
| RGS18    | 1.116587 | 0.79377  | 1.57069  | 0.526477 |
| PRSS23   | 1.020824 | 0.447346 | 2.329478 | 0.960949 |
| MTMR12   | 1.538175 | 0.695571 | 3.401498 | 0.28759  |
| CCT5     | 0.663653 | 0.262839 | 1.675685 | 0.385619 |
| DOCK1    | 2.19933  | 1.507607 | 3.208432 | 4.30E-05 |
| DIXDC1   | 1.600981 | 0.194558 | 13.17416 | 0.661646 |
| DLAT     | 0.668134 | 0.277631 | 1.6079   | 0.368113 |
| TIMM8B   | 1.046882 | 0.556845 | 1.968164 | 0.886885 |
| IL18     | 0.378965 | 0.138992 | 1.03326  | 0.057956 |
| TEX12    | 2.136768 | 0.256366 | 17.80962 | 0.482786 |
| PTS      | 0.917452 | 0.491161 | 1.713732 | 0.786967 |
| PIP4K2A  | 0.483793 | 0.282808 | 0.827614 | 0.008033 |
| FOXO1    | 1.626727 | 1.069441 | 2.474413 | 0.022985 |
| CRIM1    | 0.625425 | 0.218522 | 1.790011 | 0.3817   |
| SEC24D   | 1.093235 | 0.587864 | 2.033062 | 0.778239 |
| ABCB9    | 2.069991 | 0.819684 | 5.227456 | 0.123735 |
| RILPL2   | 0.935717 | 0.439297 | 1.993107 | 0.863262 |
| DHX37    | 1.059062 | 0.357262 | 3.13947  | 0.917567 |
| UBC      | 0.511583 | 0.132367 | 1.977207 | 0.331205 |
| ITPR1    | 1.156087 | 0.641153 | 2.084585 | 0.629658 |
| SLC7A11  | 0.19491  | 0.021827 | 1.740499 | 0.143231 |
| CACNA2D  | 1.115795 | 0.669883 | 1.858532 | 0.673833 |
| DCP1B    | 4.423269 | 0.856563 | 22.84165 | 0.075878 |
| CACNA1C  | 16.30266 | 0.233493 | 1138.263 | 0.19757  |

|          |          |          |          |          |
|----------|----------|----------|----------|----------|
| KCNA6    | 0.240393 | 0.033307 | 1.735023 | 0.157493 |
| THRB     | 0.308672 | 0.015687 | 6.073856 | 0.439372 |
| NGLY1    | 0.231144 | 0.117206 | 0.455845 | 2.37E-05 |
| OXSM     | 0.954503 | 0.313784 | 2.903513 | 0.934617 |
| UEVLD    | 0.660751 | 0.218316 | 1.999816 | 0.463328 |
| TMEM86A  | 5.761128 | 0.663937 | 49.99056 | 0.112185 |
| BTBD11   | 0.181474 | 0.05365  | 0.613846 | 0.006054 |
| UBE3B    | 1.548111 | 0.50204  | 4.773814 | 0.446867 |
| ANK3     | 0.870172 | 0.021319 | 35.51823 | 0.941421 |
| IPMK     | 0.213715 | 0.031388 | 1.455139 | 0.114865 |
| RAD9B    | 7.796612 | 0.941696 | 64.55072 | 0.056876 |
| DLG5     | 1.905725 | 0.565438 | 6.422969 | 0.298229 |
| SLC2A13  | 1.03253  | 0.123383 | 8.640684 | 0.97644  |
| GXYLT1   | 0.405011 | 0.170591 | 0.961561 | 0.04048  |
| TWF1     | 0.211546 | 0.033644 | 1.330164 | 0.097756 |
| DIP2C    | 4.617445 | 0.225291 | 94.63671 | 0.320811 |
| EIF4E    | 0.420997 | 0.034379 | 5.155478 | 0.498505 |
| MAGI1    | 0.228775 | 0.003144 | 16.64682 | 0.500107 |
| CSNK1G3  | 1.436465 | 0.343447 | 6.008006 | 0.619825 |
| SRFBP1   | 0.581648 | 0.209069 | 1.618193 | 0.299269 |
| FAM177A1 | 0.188879 | 0.021636 | 1.648873 | 0.131658 |
| MBIP     | 0.745278 | 0.310834 | 1.786929 | 0.509945 |
| EXT2     | 0.251945 | 0.087706 | 0.723737 | 0.010452 |
| TMEM18   | 2.20287  | 0.911157 | 5.325799 | 0.079534 |
| THRSP    | 0.761458 | 0.125465 | 4.62135  | 0.767069 |
| NDUFC2   | 0.336563 | 0.093249 | 1.214751 | 0.096333 |
| ME3      | 0.489139 | 0.131305 | 1.822142 | 0.286538 |
| NUBPL    | 0.986532 | 0.562569 | 1.730001 | 0.962261 |
| NEK7     | 0.165001 | 0.026045 | 1.045312 | 0.055759 |
| FER      | 0.247362 | 0.066332 | 0.922445 | 0.037509 |
| ANKRD50  | 0.499518 | 0.293479 | 0.850207 | 0.010528 |
| UPF2     | 0.709997 | 0.336    | 1.500287 | 0.369587 |
| CDC123   | 0.899918 | 0.412204 | 1.964693 | 0.791235 |
| SCLT1    | 0.639346 | 0.16968  | 2.409023 | 0.508673 |
| CCDC3    | 0.916774 | 0.596093 | 1.409971 | 0.692368 |
| FRMD4A   | 1.051806 | 0.584322 | 1.893299 | 0.866258 |
| PTPRO    | 1.660128 | 1.00931  | 2.730601 | 0.045883 |
| EPS8     | 1.048138 | 0.565198 | 1.94373  | 0.881392 |
| ACAD8    | 0.983027 | 0.288827 | 3.345753 | 0.978146 |
| THYN1    | 0.427449 | 0.198633 | 0.919847 | 0.029733 |
| VPS26B   | 1.513298 | 0.712045 | 3.216188 | 0.281456 |
| NCAPD3   | 0.239447 | 0.085681 | 0.669165 | 0.006409 |
| VTI1A    | 0.222212 | 0.030967 | 1.594554 | 0.134676 |
| QDPR     | 0.538015 | 0.2167   | 1.33576  | 0.181548 |
| FAM160B1 | 0.525923 | 0.182389 | 1.516509 | 0.234325 |
| TEX9     | 0.332361 | 0.024639 | 4.483347 | 0.406672 |
| MMAA     | 2.241725 | 0.397056 | 12.65647 | 0.360684 |
| ZNF827   | 0.926086 | 0.645231 | 1.329191 | 0.677051 |
| NR3C2    | 0.978703 | 0.196445 | 4.875955 | 0.979038 |
| AKR1C2   | 2.569548 | 0.240821 | 27.41693 | 0.434625 |
| DPYSL4   | 0.26921  | 0.024251 | 2.988486 | 0.28528  |
| VENTX    | 1.268857 | 1.019126 | 1.579784 | 0.033222 |
| ADAM8    | 1.118827 | 0.872568 | 1.434585 | 0.376027 |
| ITIH2    | 3.152875 | 0.436738 | 22.76108 | 0.254882 |
| KIN      | 0.158071 | 0.012208 | 2.046681 | 0.158004 |
| PIGF     | 1.150706 | 0.452186 | 2.928275 | 0.768329 |
| ANKAR    | 0.232026 | 0.022317 | 2.412309 | 0.221381 |
| INPP1    | 0.739837 | 0.357196 | 1.532377 | 0.417318 |

|          |          |          |          |          |
|----------|----------|----------|----------|----------|
| MFSD6    | 0.945444 | 0.524247 | 1.705044 | 0.852083 |
| RNF144A  | 0.51708  | 0.325546 | 0.821304 | 0.005208 |
| ASAP2    | 2.352246 | 1.318869 | 4.195306 | 0.003761 |
| ADAM17   | 0.900252 | 0.412886 | 1.962901 | 0.791618 |
| FLI1     | 1.516736 | 0.812612 | 2.83098  | 0.19078  |
| KCNJ1    | 0.028621 | 0.000381 | 2.150597 | 0.106854 |
| TMEM45B  | 0.168399 | 0.022885 | 1.239155 | 0.080224 |
| WWC2     | 0.133687 | 0.017814 | 1.003291 | 0.050375 |
| ACSL1    | 1.097576 | 0.830336 | 1.450827 | 0.513121 |
| SLC25A4  | 1.182063 | 0.504819 | 2.767869 | 0.700009 |
| AMN1     | 0.881021 | 0.237145 | 3.273088 | 0.849954 |
| BICD1    | 3.885475 | 0.191537 | 78.81983 | 0.376807 |
| SAV1     | 1.307868 | 0.58507  | 2.923612 | 0.513145 |
| CCDC122  | 0.261612 | 0.005828 | 11.7432  | 0.489661 |
| SERP2    | 0.188861 | 0.02946  | 1.21075  | 0.078709 |
| NBAS     | 0.896601 | 0.420582 | 1.911385 | 0.777485 |
| ZNF385D  | 0.449364 | 0.224542 | 0.899287 | 0.02383  |
| GUF1     | 0.422997 | 0.133171 | 1.343586 | 0.144537 |
| SACS     | 0.411442 | 0.142404 | 1.188763 | 0.100892 |
| PABPC3   | 1.550518 | 0.458184 | 5.247031 | 0.480722 |
| CENPJ    | 0.39098  | 0.233969 | 0.653358 | 0.000338 |
| FBXO4    | 0.77964  | 0.19738  | 3.079526 | 0.722471 |
| CCL28    | 0.966393 | 0.27767  | 3.363402 | 0.957156 |
| PARP8    | 3.053682 | 0.326282 | 28.57947 | 0.327884 |
| DST      | 0.19748  | 0.001925 | 20.25908 | 0.492356 |
| BEND6    | 1.048973 | 0.521468 | 2.110093 | 0.893341 |
| TIAL1    | 0.362638 | 0.107372 | 1.224773 | 0.102373 |
| BAG3     | 1.275246 | 0.874722 | 1.859166 | 0.206201 |
| GLT1D1   | 0.837373 | 0.300698 | 2.331889 | 0.734114 |
| SCHIP1   | 1.407535 | 1.089478 | 1.818444 | 0.008904 |
| AP1S3    | 1.691112 | 0.342536 | 8.349087 | 0.518998 |
| RABGAP1L | 0.877497 | 0.358824 | 2.145899 | 0.774554 |
| TUBA3E   | 1.568509 | 0.808213 | 3.044023 | 0.183336 |
| FAM168B  | 0.398044 | 0.164672 | 0.96215  | 0.040791 |
| PTPN14   | 1.187947 | 0.480612 | 2.936294 | 0.70913  |
| MGAT5    | 0.890805 | 0.05338  | 14.86581 | 0.935826 |
| TMEM163  | 2.171535 | 1.284875 | 3.670056 | 0.003778 |
| GEMIN6   | 1.605842 | 0.973219 | 2.649691 | 0.063779 |
| POU4F1   | 0.800804 | 0.610092 | 1.051133 | 0.109458 |
| CYSLTR2  | 0.492001 | 0.119537 | 2.02503  | 0.325835 |
| ARL11    | 0.477579 | 0.058562 | 3.894696 | 0.490074 |
| SETBP1   | 1.550787 | 0.978935 | 2.45669  | 0.061586 |
| PSTPIP2  | 0.596216 | 0.328019 | 1.083699 | 0.089827 |
| SPC25    | 0.667019 | 0.202911 | 2.192662 | 0.504828 |
| PDK1     | 0.107166 | 0.019887 | 0.577484 | 0.009352 |
| PDE3B    | 0.748293 | 0.432751 | 1.293914 | 0.299381 |
| TCF7L1   | 0.065629 | 0.004547 | 0.947219 | 0.045524 |
| TGOLN2   | 0.57055  | 0.332354 | 0.979461 | 0.041828 |
| KCNK13   | 10.59748 | 1.810061 | 62.04581 | 0.008844 |
| UHMK1    | 0.594109 | 0.260463 | 1.35515  | 0.215861 |
| ATG10    | 0.345181 | 0.125518 | 0.949265 | 0.039318 |
| SPOCK1   | 0.938496 | 0.232755 | 3.784129 | 0.928899 |
| FAM151B  | 0.46962  | 0.1122   | 1.965628 | 0.300782 |
| CWF19L2  | 0.84694  | 0.371968 | 1.928409 | 0.692317 |
| JMY      | 0.713064 | 0.340324 | 1.494045 | 0.370192 |
| HOMER1   | 2.352132 | 0.20691  | 26.73873 | 0.490413 |
| XRCC4    | 1.445821 | 0.692945 | 3.016686 | 0.325864 |
| ZNF547   | 2.09103  | 0.301551 | 14.49974 | 0.455302 |

|          |          |          |          |          |
|----------|----------|----------|----------|----------|
| ZNF773   | 1.295482 | 0.587887 | 2.854755 | 0.520746 |
| ZNF776   | 0.308929 | 0.091421 | 1.043927 | 0.058656 |
| ZNF256   | 0.455428 | 0.272843 | 0.760198 | 0.002623 |
| SUV39H2  | 13.24754 | 1.468619 | 119.4982 | 0.021311 |
| DCLRE1C  | 0.313435 | 0.086137 | 1.140525 | 0.078333 |
| OLAH     | 0.673741 | 0.106095 | 4.278502 | 0.675421 |
| RPP38    | 3.750202 | 0.581843 | 24.17151 | 0.164428 |
| NMT2     | 0.476468 | 0.221948 | 1.022859 | 0.057174 |
| ZNF837   | 1.12556  | 0.493632 | 2.566458 | 0.778513 |
| USP12    | 0.402519 | 0.163595 | 0.99038  | 0.04759  |
| CCDC50   | 1.419339 | 0.578263 | 3.483748 | 0.444633 |
| CAMK4    | 1.388488 | 0.112163 | 17.18843 | 0.7982   |
| TRIM36   | 18.2927  | 1.090406 | 306.8793 | 0.043371 |
| ZFP36L2  | 1.818433 | 1.036949 | 3.188873 | 0.036927 |
| PAN3     | 0.615347 | 0.358298 | 1.056809 | 0.078455 |
| PFKM     | 0.625325 | 0.304894 | 1.282517 | 0.200184 |
| TMEM123  | 0.77012  | 0.46976  | 1.262528 | 0.300354 |
| IGSF10   | 1.241252 | 0.758773 | 2.030523 | 0.389431 |
| SPEF2    | 1.519011 | 0.065983 | 34.96938 | 0.793901 |
| MBNL1    | 0.619416 | 0.273777 | 1.40142  | 0.250222 |
| GPD1L    | 0.613434 | 0.318307 | 1.182193 | 0.144306 |
| GJA1     | 1.384232 | 0.555829 | 3.447276 | 0.48491  |
| SLC30A6  | 0.533638 | 0.060431 | 4.712308 | 0.571999 |
| PELO     | 1.134022 | 0.607271 | 2.11768  | 0.693069 |
| RASGRP3  | 0.975247 | 0.779309 | 1.220447 | 0.82662  |
| SAR1B    | 2.165871 | 0.792502 | 5.919223 | 0.131914 |
| CATSPER3 | 0.166277 | 0.018069 | 1.530145 | 0.113118 |
| GPR180   | 0.553589 | 0.213235 | 1.437194 | 0.224426 |
| TCTEX1D1 | 0.68652  | 0.479246 | 0.983439 | 0.040264 |
| ANKRD22  | 0.657521 | 0.353138 | 1.224262 | 0.186172 |
| FARP1    | 2.006605 | 0.063789 | 63.12198 | 0.692244 |
| IFIT5    | 0.59153  | 0.143192 | 2.44362  | 0.468177 |
| PANK1    | 0.676553 | 0.095152 | 4.810436 | 0.696217 |
| PRDM8    | 1.160346 | 0.809451 | 1.663353 | 0.418279 |
| BMP3     | 0.291841 | 0.045785 | 1.860226 | 0.192517 |
| HHEX     | 1.060773 | 0.573709 | 1.961342 | 0.850769 |
| UTRN     | 0.549451 | 0.174789 | 1.727205 | 0.305478 |
| PTPRK    | 3.055753 | 0.182489 | 51.16823 | 0.437227 |
| GGPS1    | 1.203732 | 0.371748 | 3.897723 | 0.757085 |
| ZNF117   | 0.030818 | 0.00101  | 0.940634 | 0.046037 |
| MARVELD1 | 1.346533 | 0.412529 | 4.395212 | 0.622046 |
| RAD17    | 0.064166 | 0.009162 | 0.449397 | 0.005686 |
| MED21    | 1.080984 | 0.658874 | 1.773522 | 0.757872 |
| PLOD2    | 2.178816 | 0.372195 | 12.75472 | 0.387714 |
| STK32B   | 0.826095 | 0.572289 | 1.192462 | 0.307682 |
| CPB1     | 0.269065 | 0.029045 | 2.492501 | 0.247739 |
| MR1      | 0.57562  | 0.216074 | 1.533453 | 0.269252 |
| SRP19    | 0.85843  | 0.358751 | 2.054078 | 0.73166  |
| CENPH    | 0.103808 | 0.022987 | 0.468787 | 0.003231 |
| CDYL     | 4.059533 | 0.290699 | 56.69027 | 0.297627 |
| CARHSP1  | 0.909634 | 0.533785 | 1.550126 | 0.727653 |
| BANK1    | 0.353812 | 0.146652 | 0.853606 | 0.020765 |
| TXNDC11  | 2.271965 | 0.973477 | 5.302461 | 0.057723 |
| DAB2     | 1.894677 | 1.181636 | 3.037993 | 0.007983 |
| ACMSD    | 0.105626 | 0.005473 | 2.038669 | 0.136661 |
| BCL2L11  | 1.298501 | 0.691999 | 2.436574 | 0.415966 |
| ANAPC1   | 0.216473 | 0.056172 | 0.834231 | 0.026196 |
| CAST     | 1.640511 | 0.842609 | 3.19398  | 0.145342 |



|          |          |          |          |          |
|----------|----------|----------|----------|----------|
| SCOC     | 0.903718 | 0.522455 | 1.563209 | 0.717279 |
| CLGN     | 0.129089 | 0.016402 | 1.015988 | 0.051788 |
| CETN3    | 1.176398 | 0.532862 | 2.597127 | 0.687641 |
| SMARCA5  | 0.724904 | 0.312945 | 1.679163 | 0.452866 |
| SYCP2L   | 0.378895 | 0.062049 | 2.313675 | 0.293125 |
| BMP6     | 1.012866 | 0.678485 | 1.512043 | 0.950136 |
| RGPD3    | 3.385321 | 0.285238 | 40.17832 | 0.333982 |
| RASSF3   | 0.292725 | 0.045623 | 1.878163 | 0.195192 |
| HNRNPU   | 0.728887 | 0.357689 | 1.485303 | 0.383918 |
| RANBP2   | 1.884321 | 0.50041  | 7.095516 | 0.348989 |
| AHCTF1   | 0.684512 | 0.186919 | 2.506734 | 0.567087 |
| MERTK    | 1.526325 | 0.908027 | 2.565637 | 0.110522 |
| TMEM87B  | 1.308428 | 0.367861 | 4.653892 | 0.677966 |
| NR4A2    | 0.942485 | 0.744888 | 1.192499 | 0.621706 |
| RBMS1    | 1.108554 | 0.481321 | 2.553167 | 0.808695 |
| SCN3A    | 0.128009 | 0.00255  | 6.425237 | 0.303532 |
| CD96     | 0.875983 | 0.736009 | 1.042577 | 0.136072 |
| ASAP1    | 0.888357 | 0.580879 | 1.358592 | 0.584958 |
| FAM81B   | 5.536194 | 0.561249 | 54.60932 | 0.142818 |
| INO80C   | 0.650951 | 0.325879 | 1.300293 | 0.223935 |
| LPCAT1   | 0.926719 | 0.401868 | 2.137037 | 0.85831  |
| NMRAL1   | 0.923221 | 0.487581 | 1.748095 | 0.806258 |
| ING1     | 0.507748 | 0.050218 | 5.133765 | 0.565853 |
| ADPRHL1  | 0.446378 | 0.024893 | 8.004457 | 0.583921 |
| CMTM7    | 1.609043 | 0.778705 | 3.324775 | 0.19897  |
| FBXL2    | 5.481956 | 1.647128 | 18.24499 | 0.005548 |
| UBP1     | 0.929134 | 0.428152 | 2.016314 | 0.852491 |
| RMND5A   | 0.879275 | 0.406549 | 1.901676 | 0.743747 |
| CD8A     | 0.955116 | 0.682562 | 1.336502 | 0.78878  |
| RPIA     | 0.303617 | 0.16311  | 0.565161 | 0.00017  |
| PTPRD    | 1.204503 | 0.364925 | 3.975691 | 0.760063 |
| CNKSR3   | 0.963819 | 0.519393 | 1.788524 | 0.906997 |
| GTF2E1   | 1.594213 | 0.792565 | 3.206696 | 0.190884 |
| CFDP1    | 0.621838 | 0.311282 | 1.242225 | 0.17843  |
| ZDHHC7   | 1.112393 | 0.572526 | 2.161333 | 0.753291 |
| JAZF1    | 1.080347 | 0.817444 | 1.427803 | 0.587001 |
| CMIP     | 1.370508 | 0.367084 | 5.116786 | 0.639119 |
| PID1     | 2.370385 | 1.365327 | 4.115295 | 0.002167 |
| TRIP12   | 1.048674 | 0.569378 | 1.931436 | 0.878777 |
| FBXO36   | 0.098412 | 0.005306 | 1.825378 | 0.119688 |
| CEBPG    | 0.707382 | 0.3761   | 1.330469 | 0.28279  |
| KCTD15   | 0.656397 | 0.400845 | 1.074873 | 0.094322 |
| ZNF599   | 7.15544  | 0.165491 | 309.3852 | 0.305855 |
| MCOLN2   | 0.948005 | 0.619861 | 1.449861 | 0.805432 |
| LGI4     | 0.720501 | 0.052655 | 9.858901 | 0.806004 |
| DDAH1    | 1.668034 | 0.399708 | 6.96092  | 0.48273  |
| CHD1     | 0.725068 | 0.396392 | 1.326272 | 0.296733 |
| DGKE     | 2.630462 | 0.533623 | 12.9667  | 0.234717 |
| HS2ST1   | 0.530945 | 0.196933 | 1.431462 | 0.210893 |
| MSI2     | 1.047047 | 0.708365 | 1.54766  | 0.817635 |
| HS3ST3A1 | 1.260861 | 0.396868 | 4.005792 | 0.694306 |
| GDPD1    | 0.496025 | 0.187131 | 1.314804 | 0.158632 |
| NUS1     | 0.818177 | 0.233166 | 2.870976 | 0.754037 |
| PPP2R5E  | 0.659541 | 0.292864 | 1.48531  | 0.314976 |
| GRAP     | 1.69235  | 0.360547 | 7.943631 | 0.504845 |
| SLC5A10  | 1.451222 | 0.563472 | 3.73762  | 0.440392 |
| AK5      | 4.390668 | 1.476045 | 13.06055 | 0.007814 |
| CABYR    | 0.324332 | 0.007844 | 13.41092 | 0.553232 |

|          |          |          |          |          |
|----------|----------|----------|----------|----------|
| IMPACT   | 0.143289 | 0.01301  | 1.578097 | 0.112455 |
| TBCEL    | 0.816016 | 0.295141 | 2.256152 | 0.695171 |
| JPH3     | 0.1914   | 0.019867 | 1.843942 | 0.152563 |
| ANKH     | 0.911725 | 0.071945 | 11.55386 | 0.943136 |
| UBASH3B  | 1.011445 | 0.58507  | 1.748543 | 0.967499 |
| ROBO4    | 2.22602  | 0.690477 | 7.176435 | 0.180299 |
| ROBO3    | 1.587922 | 1.130587 | 2.230253 | 0.007627 |
| TBRG1    | 0.151357 | 0.016388 | 1.397932 | 0.095988 |
| NRGN     | 1.171315 | 0.992983 | 1.381673 | 0.060599 |
| GPR15    | 3.700522 | 0.394193 | 34.73896 | 0.252124 |
| ABI3BP   | 0.031601 | 0.001753 | 0.569508 | 0.019203 |
| ANGPT1   | 1.033061 | 0.788161 | 1.354055 | 0.813739 |
| PITPNC1  | 1.25589  | 0.610467 | 2.583695 | 0.535884 |
| CC2D1B   | 0.564391 | 0.102081 | 3.120433 | 0.512062 |
| PRKCA    | 1.349061 | 0.95059  | 1.914565 | 0.093685 |
| LRRK1    | 0.854841 | 0.217274 | 3.363286 | 0.822431 |
| GAL3ST2  | 1.64898  | 0.165142 | 16.46543 | 0.670102 |
| ABCA5    | 0.18911  | 0.009356 | 3.822431 | 0.277579 |
| ENPP3    | 0.34967  | 0.116548 | 1.04909  | 0.060865 |
| UCHL1    | 1.10964  | 0.680559 | 1.809249 | 0.676612 |
| MIA3     | 0.239838 | 0.007676 | 7.493733 | 0.416186 |
| DISP1    | 1.994136 | 0.569659 | 6.98063  | 0.280275 |
| TNIK     | 0.321855 | 0.090108 | 1.149626 | 0.080933 |
| TDH      | 0.417297 | 0.02932  | 5.939102 | 0.518899 |
| FAM167A  | 3.334238 | 1.45178  | 7.657594 | 0.004529 |
| NEIL2    | 1.910262 | 0.940922 | 3.878216 | 0.073226 |
| OBSCN    | 2.162067 | 0.709191 | 6.591367 | 0.175176 |
| LONRF1   | 0.594631 | 0.272629 | 1.29695  | 0.191395 |
| TRIM11   | 1.729715 | 0.678526 | 4.409433 | 0.251106 |
| ENAH     | 1.758734 | 0.240758 | 12.84751 | 0.577885 |
| SH3RF1   | 0.822137 | 0.357705 | 1.889571 | 0.644616 |
| GBP5     | 1.094344 | 0.733106 | 1.633584 | 0.659163 |
| BUB3     | 0.839915 | 0.290291 | 2.430177 | 0.747577 |
| MMP21    | 3.66157  | 0.068993 | 194.3244 | 0.52185  |
| LY96     | 1.20401  | 0.944688 | 1.534518 | 0.133566 |
| TMSB4Y   | 0.580194 | 0.263975 | 1.275216 | 0.175451 |
| CXADR    | 0.311225 | 0.071143 | 1.3615   | 0.121106 |
| BTG3     | 0.814978 | 0.510557 | 1.300909 | 0.39119  |
| NCAM2    | 0.625808 | 0.060286 | 6.496284 | 0.694616 |
| L3MBTL4  | 9.025112 | 0.771433 | 105.5861 | 0.079573 |
| RABGEF1  | 1.341344 | 0.429142 | 4.192562 | 0.613517 |
| MRPL39   | 1.02424  | 0.215446 | 4.869279 | 0.975978 |
| GABPA    | 0.777397 | 0.202608 | 2.98283  | 0.713602 |
| ADAMTS1  | 0.874752 | 0.606522 | 1.261606 | 0.473869 |
| TSEN2    | 0.462261 | 0.201834 | 1.05872  | 0.068    |
| SLFN13   | 0.281111 | 0.108875 | 0.725814 | 0.008738 |
| XPC      | 1.713853 | 0.750687 | 3.912806 | 0.200858 |
| FGD5     | 1.936572 | 0.894701 | 4.191691 | 0.093435 |
| FLCN     | 2.33638  | 0.704695 | 7.746148 | 0.165243 |
| DPH3     | 1.398774 | 0.563933 | 3.469507 | 0.469023 |
| OXNAD1   | 0.10963  | 0.010956 | 1.096998 | 0.059947 |
| PLCL2    | 0.958119 | 0.604505 | 1.518586 | 0.85553  |
| CXXC1    | 0.651721 | 0.262681 | 1.616947 | 0.355763 |
| SKA1     | 0.587841 | 0.242793 | 1.423254 | 0.238938 |
| PPP4R1   | 3.313364 | 0.718158 | 15.28685 | 0.124638 |
| CCDC144E | 0.527943 | 0.072871 | 3.824877 | 0.52725  |
| MPPE1    | 0.778585 | 0.196208 | 3.089554 | 0.721918 |
| USP43    | 1.287881 | 0.26488  | 6.261844 | 0.753865 |

|          |          |          |          |          |
|----------|----------|----------|----------|----------|
| RAB6B    | 0.714615 | 0.362913 | 1.407152 | 0.331077 |
| EME1     | 0.446282 | 0.12419  | 1.60374  | 0.216375 |
| EPHB1    | 1.048702 | 0.314286 | 3.499283 | 0.938348 |
| ACSS1    | 0.721445 | 0.430909 | 1.20787  | 0.214342 |
| ANKRD40  | 1.18588  | 0.156102 | 9.008922 | 0.869111 |
| ZNF18    | 0.948115 | 0.373736 | 2.405237 | 0.910686 |
| VOPP1    | 1.28621  | 0.65936  | 2.509001 | 0.46033  |
| APOOL    | 0.238521 | 0.061147 | 0.93042  | 0.039036 |
| CYP2U1   | 4.469723 | 0.889107 | 22.47021 | 0.06917  |
| FBXL18   | 1.489852 | 0.437    | 5.07931  | 0.524065 |
| KLF10    | 0.87832  | 0.489113 | 1.577235 | 0.664012 |
| PTPRN2   | 1.739706 | 0.794658 | 3.808655 | 0.16604  |
| AZIN1    | 0.519487 | 0.256154 | 1.053531 | 0.069461 |
| ATP6V1C1 | 0.778548 | 0.267561 | 2.26542  | 0.645981 |
| OTUD6B   | 0.550522 | 0.199619 | 1.518268 | 0.248826 |
| GTF3C6   | 0.117427 | 0.023461 | 0.587759 | 0.009141 |
| TTC39B   | 0.506398 | 0.06645  | 3.859127 | 0.51139  |
| AGPAT5   | 0.535371 | 0.315653 | 0.90803  | 0.020456 |
| MMS19    | 0.972284 | 0.412343 | 2.2926   | 0.948794 |
| PI4K2A   | 1.694861 | 0.530797 | 5.411777 | 0.373092 |
| MARVELD  | 4.837616 | 1.250056 | 18.72119 | 0.022417 |
| ZFYVE27  | 2.36776  | 0.472001 | 11.87771 | 0.294853 |
| GOLGA7B  | 6.965925 | 0.50169  | 96.7214  | 0.148155 |
| SLC25A28 | 0.731995 | 0.335123 | 1.598866 | 0.433827 |
| HSPA13   | 1.24895  | 0.339212 | 4.59853  | 0.738171 |
| SAMSN1   | 1.206756 | 0.745118 | 1.954402 | 0.444885 |
| USP25    | 0.60821  | 0.162595 | 2.275102 | 0.460077 |
| ZCCHC10  | 1.071109 | 0.182293 | 6.293594 | 0.939394 |
| MOV10    | 1.602401 | 0.786336 | 3.265383 | 0.194231 |
| RHOC     | 1.739797 | 1.263969 | 2.394752 | 0.000681 |
| PPM1J    | 0.54663  | 0.060949 | 4.902539 | 0.589459 |
| DBI      | 0.998674 | 0.609899 | 1.635272 | 0.995794 |
| SLC16A1  | 0.762326 | 0.37151  | 1.564269 | 0.459313 |
| HEATR3   | 0.474961 | 0.162998 | 1.383988 | 0.172435 |
| TRIM74   | 0.22978  | 0.05552  | 0.95099  | 0.042427 |
| OXA1L    | 0.843707 | 0.362714 | 1.962541 | 0.693157 |
| SLC7A7   | 1.184676 | 0.984619 | 1.425381 | 0.072539 |
| LARP1    | 0.314061 | 0.06568  | 1.501749 | 0.146879 |
| CNOT8    | 0.602394 | 0.328394 | 1.105011 | 0.101552 |
| LRGUK    | 2.333105 | 0.176747 | 30.79764 | 0.519875 |
| MIER3    | 0.126131 | 0.012995 | 1.22421  | 0.074179 |
| NUP205   | 0.440792 | 0.220347 | 0.881783 | 0.020581 |
| ZKSCAN2  | 1.345059 | 0.359594 | 5.031182 | 0.659634 |
| PIK3AP1  | 1.109196 | 0.746878 | 1.647278 | 0.607533 |
| RBM45    | 0.572936 | 0.203427 | 1.613624 | 0.291757 |
| TTN      | 0.004713 | 2.45E-05 | 0.906851 | 0.04589  |
| VSIG4    | 3.109457 | 1.760709 | 5.491378 | 9.25E-05 |
| PDIA4    | 1.174606 | 0.563775 | 2.447254 | 0.667405 |
| OTOA     | 19.99152 | 0.181668 | 2199.945 | 0.21172  |
| KCTD18   | 0.814357 | 0.245991 | 2.695938 | 0.736704 |
| FAM126B  | 0.419745 | 0.094779 | 1.858918 | 0.252883 |
| FZD7     | 1.411052 | 0.217098 | 9.171301 | 0.718425 |
| RNF20    | 0.697495 | 0.326887 | 1.488283 | 0.351508 |
| PPARGC1E | 1.376531 | 0.755357 | 2.508533 | 0.296638 |
| ELMO1    | 0.856918 | 0.275219 | 2.668085 | 0.789881 |
| SLC26A2  | 0.786067 | 0.29789  | 2.074264 | 0.626811 |
| LSM11    | 1.272649 | 0.151765 | 10.672   | 0.824146 |
| MED7     | 1.545191 | 0.60134  | 3.970494 | 0.366147 |

|         |          |          |          |          |
|---------|----------|----------|----------|----------|
| RRAGA   | 1.212385 | 0.577992 | 2.543077 | 0.610365 |
| RASA2   | 0.783115 | 0.210202 | 2.917518 | 0.715615 |
| RMND1   | 3.6059   | 1.025699 | 12.67673 | 0.045552 |
| SLA     | 1.061506 | 0.645267 | 1.746246 | 0.814193 |
| TMBIM4  | 0.794243 | 0.303939 | 2.075488 | 0.638323 |
| VBP1    | 0.612145 | 0.276456 | 1.355447 | 0.226244 |
| RAB39B  | 0.734841 | 0.096061 | 5.621332 | 0.766628 |
| CLIC2   | 1.840924 | 1.066087 | 3.178917 | 0.028555 |
| AFF2    | 0.204801 | 0.059838 | 0.700949 | 0.011538 |
| GRIP1   | 0.990154 | 0.167418 | 5.856019 | 0.991294 |
| VPS37A  | 1.29383  | 0.623397 | 2.685279 | 0.489267 |
| PSD3    | 1.452566 | 0.100088 | 21.08082 | 0.784442 |
| GNA14   | 5.090642 | 0.942624 | 27.49202 | 0.058585 |
| FAM161B | 1.427798 | 0.112543 | 18.11396 | 0.783511 |
| GNAQ    | 0.76618  | 0.493552 | 1.189404 | 0.235244 |
| GPR61   | 0.400479 | 0.061755 | 2.597095 | 0.337367 |
| ADK     | 0.732213 | 0.179142 | 2.992799 | 0.664359 |
| BATF    | 0.976171 | 0.522467 | 1.823867 | 0.93972  |
| DCK     | 1.09375  | 0.425689 | 2.810241 | 0.852349 |
| ADAMTS3 | 0.156024 | 0.032425 | 0.750758 | 0.020471 |
| ALX3    | 25.05183 | 0.966424 | 649.3985 | 0.052453 |
| DPY19L4 | 0.586747 | 0.251978 | 1.366278 | 0.216351 |
| ART3    | 0.855729 | 0.200172 | 3.658222 | 0.833516 |
| WHAMM   | 0.745851 | 0.308948 | 1.800607 | 0.514345 |
| CXCL13  | 2.92394  | 0.565461 | 15.11939 | 0.200586 |
| N6AMT1  | 0.426606 | 0.123899 | 1.468878 | 0.176873 |
| RWDD2B  | 2.261487 | 0.54591  | 9.368433 | 0.260474 |
| USP16   | 1.008615 | 0.269994 | 3.767877 | 0.989821 |
| CCT8    | 0.870012 | 0.48264  | 1.568293 | 0.643236 |
| BACH1   | 0.397158 | 0.042211 | 3.736806 | 0.419446 |
| TSPAN7  | 0.832739 | 0.646151 | 1.073206 | 0.157327 |
| TIAM1   | 3.967057 | 1.242778 | 12.66319 | 0.019966 |
| RPGR    | 0.167274 | 0.039654 | 0.705611 | 0.014902 |
| PCGF6   | 0.375933 | 0.116311 | 1.215069 | 0.102152 |
| ANKRD9  | 1.086572 | 0.71428  | 1.652906 | 0.698083 |
| SFXN2   | 0.39268  | 0.092248 | 1.67155  | 0.205938 |
| FUT6    | 0.916317 | 0.311653 | 2.694143 | 0.873808 |
| TDRD9   | 1.005012 | 0.66223  | 1.525226 | 0.981257 |
| FGF18   | 6.470493 | 0.581915 | 71.94737 | 0.128662 |
| PCDH1   | 0.021305 | 0.00061  | 0.743745 | 0.033729 |
| UQCRB   | 0.684305 | 0.260915 | 1.794734 | 0.440639 |
| PTDSS1  | 0.759287 | 0.51913  | 1.110544 | 0.155757 |
| RPL30   | 1.296768 | 0.562902 | 2.98739  | 0.541635 |
| FAM122C | 1.322315 | 0.155905 | 11.21528 | 0.797849 |
| SUPV3L1 | 0.335747 | 0.112974 | 0.997805 | 0.04954  |
| FAM122B | 0.46518  | 0.212973 | 1.016055 | 0.054857 |
| EEF1A1  | 1.460984 | 0.256435 | 8.323661 | 0.669352 |
| FBXO43  | 0.156509 | 0.009252 | 2.647563 | 0.198707 |
| HK1     | 2.001481 | 0.890121 | 4.500426 | 0.093266 |
| TYSND1  | 2.315047 | 0.821797 | 6.521616 | 0.112161 |
| PHF6    | 0.296388 | 0.026351 | 3.333639 | 0.324698 |
| CD109   | 3.724441 | 1.094593 | 12.67271 | 0.035324 |
| NODAL   | 0.385403 | 0.056307 | 2.637963 | 0.331272 |
| PRG3    | 0.794642 | 0.590369 | 1.069596 | 0.129475 |
| UBE2L6  | 0.792286 | 0.323409 | 1.940936 | 0.610535 |
| ZDHHC5  | 1.107976 | 0.400311 | 3.066642 | 0.843514 |
| MED19   | 1.7575   | 0.529145 | 5.837351 | 0.357201 |
| ZFAND3  | 3.725375 | 1.612655 | 8.605941 | 0.00208  |

|           |          |          |          |          |
|-----------|----------|----------|----------|----------|
| NPTN      | 1.138173 | 0.536104 | 2.416393 | 0.736161 |
| SAMD8     | 2.652961 | 1.046321 | 6.72662  | 0.039845 |
| RAB11FIP1 | 1.344741 | 0.716698 | 2.523139 | 0.356257 |
| GLYATL2   | 0.432856 | 0.079783 | 2.348412 | 0.331805 |
| UTP14A    | 0.896633 | 0.369564 | 2.175402 | 0.80934  |
| AIFM1     | 0.200685 | 0.052479 | 0.767443 | 0.018939 |
| MAPK13    | 0.674848 | 0.285093 | 1.597445 | 0.37104  |
| BAG4      | 0.649938 | 0.244152 | 1.730151 | 0.388388 |
| MS4A1     | 15.66707 | 0.650843 | 377.1372 | 0.090011 |
| ATAD2     | 0.528712 | 0.287176 | 0.973397 | 0.040702 |
| FBXO32    | 1.543136 | 0.453952 | 5.245633 | 0.487118 |
| NSMCE2    | 0.563569 | 0.264491 | 1.200834 | 0.137335 |
| ZNF689    | 0.880367 | 0.411204 | 1.88482  | 0.74287  |
| PRR14     | 0.578073 | 0.284103 | 1.176222 | 0.130498 |
| FBR3      | 1.336744 | 0.693825 | 2.57541  | 0.385692 |
| FRRS1     | 0.628411 | 0.053193 | 7.423968 | 0.712321 |
| PHKG2     | 0.838261 | 0.362021 | 1.940993 | 0.680459 |
| SASS6     | 0.19598  | 0.029529 | 1.300679 | 0.091464 |
| ITGAD     | 2.141506 | 0.272005 | 16.86015 | 0.469483 |
| VPS8      | 0.38763  | 0.168129 | 0.8937   | 0.026171 |
| GALK2     | 0.322258 | 0.083209 | 1.248072 | 0.101174 |
| B3GNT7    | 1.508391 | 0.145415 | 15.64651 | 0.730543 |
| MPV17L    | 2.204674 | 0.71496  | 6.798411 | 0.168827 |
| BUB1B     | 0.584509 | 0.244382 | 1.398017 | 0.227468 |
| PDE6D     | 0.447463 | 0.154255 | 1.297998 | 0.138886 |
| EIF4A2    | 0.468599 | 0.239733 | 0.915956 | 0.026645 |
| BRPF1     | 0.605535 | 0.273804 | 1.339179 | 0.215435 |
| RPUSD3    | 0.59814  | 0.364411 | 0.981779 | 0.042083 |
| TATDN2    | 0.719616 | 0.344812 | 1.501823 | 0.380724 |
| GHRL      | 0.577441 | 0.37048  | 0.900015 | 0.0153   |
| SEC13     | 0.5082   | 0.191504 | 1.348625 | 0.174042 |
| EXOG      | 0.421796 | 0.03091  | 5.75577  | 0.517381 |
| NTAN1     | 5.018706 | 0.997883 | 25.24085 | 0.050301 |
| ZFYVE9    | 0.915725 | 0.084366 | 9.939422 | 0.942313 |
| SMG1      | 0.84794  | 0.346335 | 2.076027 | 0.71806  |
| FCHO2     | 0.982843 | 0.526588 | 1.834411 | 0.956652 |
| RBPMS     | 2.788542 | 1.197899 | 6.491337 | 0.017368 |
| TIMP4     | 0.804806 | 0.306815 | 2.111087 | 0.658964 |
| CPT2      | 1.680449 | 0.821139 | 3.439016 | 0.155427 |
| NECAP2    | 2.339166 | 1.210603 | 4.519811 | 0.01145  |
| LRP8      | 0.875007 | 0.282241 | 2.712709 | 0.817087 |
| PAXIP1    | 0.398938 | 0.178348 | 0.892364 | 0.025272 |
| SSBP3     | 1.580218 | 0.744047 | 3.356089 | 0.233795 |
| CLDN12    | 0.701802 | 0.278319 | 1.769643 | 0.453014 |
| MMP14     | 0.643227 | 0.075444 | 5.484058 | 0.686543 |
| FZD1      | 3.595378 | 1.333023 | 9.697311 | 0.011478 |
| GATAD1    | 0.238021 | 0.084955 | 0.66687  | 0.006319 |
| SUSD3     | 0.878682 | 0.643111 | 1.200541 | 0.416684 |
| TMED6     | 0.096042 | 0.016906 | 0.545596 | 0.008204 |
| DHRS4     | 0.957039 | 0.377974 | 2.423246 | 0.92619  |
| DDX19B    | 0.413837 | 0.112905 | 1.516867 | 0.183096 |
| ST3GAL2   | 2.690304 | 1.384551 | 5.227495 | 0.0035   |
| IL34      | 7.735331 | 0.655572 | 91.27201 | 0.104239 |
| DHRS1     | 1.89357  | 0.736198 | 4.870441 | 0.185308 |
| CACNA1D   | 1.377802 | 0.153812 | 12.34192 | 0.774498 |
| KIT       | 0.959077 | 0.740318 | 1.242479 | 0.751756 |
| AASDH     | 0.629256 | 0.256759 | 1.542156 | 0.311147 |
| ZNF19     | 12.21163 | 1.227774 | 121.4588 | 0.032757 |

|          |          |          |          |          |
|----------|----------|----------|----------|----------|
| CACNA2D  | 1.080791 | 0.804228 | 1.45246  | 0.606414 |
| RNF111   | 0.597806 | 0.076958 | 4.643701 | 0.622795 |
| CCNB2    | 0.775916 | 0.554157 | 1.086418 | 0.139587 |
| FAM81A   | 3.22822  | 1.465173 | 7.112746 | 0.003641 |
| MYO1E    | 5.624211 | 0.735775 | 42.99107 | 0.096055 |
| APPL1    | 0.993661 | 0.444423 | 2.22167  | 0.98764  |
| AFAP1L1  | 0.310191 | 0.041111 | 2.340476 | 0.256267 |
| TSC22D3  | 1.033843 | 0.562123 | 1.901417 | 0.914742 |
| DYRK1A   | 0.935204 | 0.389781 | 2.243843 | 0.880745 |
| KCNJ15   | 3.362085 | 0.219906 | 51.40195 | 0.383502 |
| ERG      | 0.107567 | 0.003412 | 3.391205 | 0.205381 |
| ETS2     | 1.69663  | 1.124801 | 2.559165 | 0.011711 |
| TSPAN18  | 0.554937 | 0.098465 | 3.127566 | 0.504448 |
| LCA5L    | 3.310767 | 0.320603 | 34.18931 | 0.314892 |
| SLC35B2  | 0.786262 | 0.421191 | 1.467762 | 0.45022  |
| TMEM164  | 0.604657 | 0.107668 | 3.395717 | 0.567716 |
| MX1      | 1.405103 | 1.104085 | 1.788192 | 0.005694 |
| C2CD2    | 0.811231 | 0.486876 | 1.35167  | 0.421904 |
| SLC38A10 | 1.929144 | 0.906476 | 4.105565 | 0.088166 |
| ZNF618   | 0.629774 | 0.240683 | 1.647876 | 0.346095 |
| SVOPL    | 0.777223 | 0.611693 | 0.987547 | 0.039159 |
| SNX22    | 1.469643 | 0.544901 | 3.963749 | 0.446908 |
| UBN2     | 0.680012 | 0.216635 | 2.134544 | 0.508761 |
| BRAF     | 0.107551 | 0.018138 | 0.637726 | 0.014076 |
| PSMG3    | 0.895797 | 0.365584 | 2.19499  | 0.809824 |
| WDR19    | 0.553643 | 0.29823  | 1.027798 | 0.061055 |
| SLC37A3  | 2.30352  | 0.574962 | 9.228781 | 0.238643 |
| AP3S2    | 0.490753 | 0.138314 | 1.741243 | 0.270619 |
| FMNL2    | 3.503501 | 1.248347 | 9.832619 | 0.017253 |
| SPPL3    | 2.994766 | 0.782254 | 11.46511 | 0.109283 |
| RAB28    | 0.259686 | 0.059208 | 1.138983 | 0.073866 |
| TNFRSF14 | 0.745036 | 0.504204 | 1.100901 | 0.139562 |
| PANK4    | 1.90593  | 0.658243 | 5.51858  | 0.234428 |
| MEGF11   | 7.50971  | 0.651893 | 86.51079 | 0.105913 |
| PEX10    | 1.040968 | 0.130511 | 8.30286  | 0.969768 |
| RER1     | 2.044988 | 0.755622 | 5.534481 | 0.159033 |
| RADIL    | 1.076405 | 0.273739 | 4.232679 | 0.916063 |
| SKI      | 4.400477 | 1.098888 | 17.62163 | 0.036333 |
| WIPI2    | 1.026057 | 0.26879  | 3.916789 | 0.969977 |
| LDLRAP1  | 1.366763 | 0.679892 | 2.747553 | 0.380485 |
| AGAP1    | 1.040428 | 0.017303 | 62.5593  | 0.984871 |
| KRTCAP3  | 0.159048 | 0.025192 | 1.004129 | 0.050514 |
| PAFAH2   | 0.706004 | 0.342644 | 1.45469  | 0.345249 |
| MRPL17   | 1.31034  | 0.744876 | 2.305069 | 0.348293 |
| DUSP2    | 1.266597 | 0.924823 | 1.734677 | 0.140779 |
| UBXN11   | 2.773421 | 0.898767 | 8.558241 | 0.076011 |
| PTPDC1   | 3.4975   | 0.191128 | 64.00166 | 0.398558 |
| GALNT14  | 1.439351 | 0.75238  | 2.753571 | 0.27118  |
| NCK1     | 1.004152 | 0.460259 | 2.19077  | 0.991694 |
| HPD      | 1.983207 | 0.425615 | 9.241006 | 0.383185 |
| RHPN1    | 1.476344 | 1.015503 | 2.146316 | 0.041296 |
| TPRG1L   | 0.864634 | 0.343433 | 2.176823 | 0.757511 |
| LRRC43   | 1.138135 | 0.15357  | 8.434936 | 0.899248 |
| XKR8     | 1.655944 | 0.610015 | 4.495214 | 0.322226 |
| CNNM4    | 0.9569   | 0.25875  | 3.53878  | 0.947359 |
| EYA3     | 0.150101 | 0.034833 | 0.646813 | 0.010941 |
| DZIP1L   | 1.19554  | 0.29092  | 4.913079 | 0.804383 |
| TMSB15A  | 2.631613 | 0.775109 | 8.934729 | 0.120786 |

|          |          |          |          |          |
|----------|----------|----------|----------|----------|
| FANCC    | 0.194517 | 0.048175 | 0.785405 | 0.021495 |
| MRAS     | 4.626319 | 1.070862 | 19.98653 | 0.040202 |
| WASF2    | 2.631851 | 1.272324 | 5.444085 | 0.00907  |
| ABHD3    | 0.851344 | 0.459002 | 1.579047 | 0.609624 |
| FAIM     | 1.170968 | 0.407311 | 3.366388 | 0.769571 |
| CLSTN2   | 0.655431 | 0.1614   | 2.661649 | 0.554626 |
| COLEC12  | 0.701719 | 0.121855 | 4.040946 | 0.69169  |
| RNF207   | 0.101928 | 0.010115 | 1.027154 | 0.052717 |
| CUL4B    | 0.939792 | 0.290415 | 3.041201 | 0.917457 |
| GPR153   | 0.678353 | 0.056394 | 8.159769 | 0.759751 |
| SLC13A3  | 1.546594 | 0.325272 | 7.353713 | 0.583587 |
| GPRASP2  | 0.924325 | 0.095799 | 8.918485 | 0.945755 |
| RHBDL2   | 1.284731 | 0.623854 | 2.645702 | 0.496641 |
| AUTS2    | 0.9262   | 0.632322 | 1.356659 | 0.693823 |
| SHROOM4  | 1.047561 | 0.652639 | 1.681458 | 0.847384 |
| CDC25C   | 0.616918 | 0.131183 | 2.901201 | 0.540864 |
| MITD1    | 0.289936 | 0.124465 | 0.675395 | 0.00411  |
| EIF5B    | 0.551948 | 0.236466 | 1.288335 | 0.169392 |
| RIBC1    | 0.090598 | 0.007283 | 1.127047 | 0.061905 |
| TSPAN33  | 1.091175 | 0.740337 | 1.608272 | 0.659306 |
| AHCYL2   | 0.570753 | 0.22478  | 1.449238 | 0.23818  |
| B4GALT5  | 1.018735 | 0.705466 | 1.471114 | 0.921133 |
| CD1D     | 1.313806 | 0.915664 | 1.885065 | 0.13843  |
| CD1A     | 3.466516 | 1.170783 | 10.26384 | 0.02479  |
| SPATA2   | 0.952434 | 0.269596 | 3.364773 | 0.939672 |
| CD1C     | 0.774572 | 0.411316 | 1.458642 | 0.428946 |
| CD1E     | 1.455591 | 0.558403 | 3.794291 | 0.442497 |
| HMH1     | 1.991686 | 0.357268 | 11.10318 | 0.431924 |
| NCF1     | 1.095408 | 0.935091 | 1.283212 | 0.259021 |
| TSR2     | 0.592981 | 0.214676 | 1.637939 | 0.313405 |
| PPP1R9A  | 1.296893 | 0.490172 | 3.43131  | 0.600495 |
| ZC3H18   | 1.775924 | 0.647446 | 4.871303 | 0.264609 |
| ZFAND2B  | 0.702968 | 0.294606 | 1.677372 | 0.427022 |
| GDPD5    | 1.289189 | 0.882697 | 1.882875 | 0.18873  |
| DYNC111  | 4.285265 | 0.717916 | 25.57889 | 0.110399 |
| PFKFB1   | 0.023684 | 0.001131 | 0.495778 | 0.01586  |
| ALAS2    | 0.983101 | 0.758224 | 1.274673 | 0.897665 |
| TMED4    | 0.377682 | 0.154123 | 0.925519 | 0.033236 |
| PPP1R15B | 1.117583 | 0.555183 | 2.249695 | 0.755472 |
| COPG2    | 0.87118  | 0.546366 | 1.389094 | 0.562364 |
| ZSCAN12  | 1.225944 | 0.258275 | 5.819144 | 0.797672 |
| TAGLN2   | 2.001716 | 1.140083 | 3.514541 | 0.015673 |
| ELK4     | 0.335252 | 0.063023 | 1.78337  | 0.199993 |
| SLC45A3  | 1.096861 | 0.83227  | 1.44557  | 0.511556 |
| DUSP23   | 0.951351 | 0.446019 | 2.029217 | 0.89733  |
| RNF166   | 1.493055 | 0.801389 | 2.781687 | 0.206751 |
| NBL1     | 1.259452 | 0.919151 | 1.725745 | 0.15118  |
| HTR6     | 0.189574 | 0.011201 | 3.208373 | 0.249224 |
| F11R     | 2.08124  | 0.723934 | 5.983366 | 0.173711 |
| USF1     | 0.712765 | 0.398027 | 1.276379 | 0.254679 |
| SPATA2L  | 1.621276 | 1.041752 | 2.523187 | 0.032256 |
| NIT1     | 3.947655 | 1.04678  | 14.88754 | 0.042614 |
| DEDD     | 4.040413 | 0.976084 | 16.72494 | 0.054034 |
| ZNF276   | 2.093638 | 0.514272 | 8.523361 | 0.302275 |
| NPM2     | 1.063478 | 0.681751 | 1.658942 | 0.786167 |
| FGF17    | 1.005576 | 0.132467 | 7.633457 | 0.99571  |
| CDA      | 0.998704 | 0.798445 | 1.249189 | 0.990935 |
| PINK1    | 0.981084 | 0.444784 | 2.164029 | 0.962262 |

|          |          |          |          |          |
|----------|----------|----------|----------|----------|
| B4GALT3  | 0.604937 | 0.251625 | 1.454338 | 0.261407 |
| ADAMTS4  | 0.481299 | 0.157491 | 1.470871 | 0.199495 |
| FAM160B2 | 1.488492 | 0.659298 | 3.360559 | 0.338396 |
| NDUFS2   | 1.294746 | 0.400323 | 4.187543 | 0.666233 |
| SLC5A11  | 29.21831 | 1.561193 | 546.8315 | 0.023945 |
| FCER1G   | 1.106231 | 0.889039 | 1.376482 | 0.365304 |
| APOA2    | 0.740504 | 0.042342 | 12.95043 | 0.836971 |
| TOMM40L  | 3.635033 | 0.647564 | 20.40487 | 0.142571 |
| MPZ      | 5.348212 | 0.687734 | 41.59075 | 0.109101 |
| CACHD1   | 0.560986 | 0.170158 | 1.849491 | 0.34226  |
| CDC42SE2 | 0.517638 | 0.189231 | 1.415988 | 0.199665 |
| RAPGEF6  | 0.729664 | 0.404422 | 1.316471 | 0.295207 |
| EPB41    | 0.942208 | 0.389013 | 2.28207  | 0.895068 |
| ALG8     | 0.359743 | 0.107184 | 1.20741  | 0.097949 |
| FBXW5    | 4.717008 | 1.086856 | 20.47205 | 0.038343 |
| SYNJ1    | 1.83458  | 0.322828 | 10.42564 | 0.493641 |
| IFNAR2   | 3.855957 | 0.950307 | 15.6459  | 0.058941 |
| MRPL10   | 4.995356 | 0.84164  | 29.64877 | 0.076689 |
| IFNGR2   | 1.373017 | 0.931969 | 2.022789 | 0.108809 |
| GART     | 0.444945 | 0.173555 | 1.140708 | 0.091817 |
| SON      | 0.387941 | 0.151437 | 0.9938   | 0.048504 |
| DONSON   | 0.21481  | 0.073563 | 0.627262 | 0.004908 |
| SV2A     | 1.310636 | 0.800628 | 2.145522 | 0.282049 |
| STC1     | 0.916643 | 0.074855 | 11.22482 | 0.94571  |
| CSRP1    | 1.6849   | 1.070989 | 2.650715 | 0.024032 |
| C1QC     | 1.463163 | 1.14077  | 1.876667 | 0.002726 |
| RCAN1    | 1.099225 | 0.302967 | 3.988214 | 0.885596 |
| UBE2Z    | 1.866557 | 0.504801 | 6.901803 | 0.349584 |
| SNF8     | 0.788627 | 0.440309 | 1.41249  | 0.424543 |
| CCDC24   | 1.43202  | 0.981966 | 2.088342 | 0.062122 |
| RUNX1    | 2.153419 | 0.897598 | 5.16625  | 0.085797 |
| IGF2BP1  | 0.385295 | 0.135361 | 1.096711 | 0.073938 |
| CBR1     | 1.261633 | 0.582107 | 2.734406 | 0.555937 |
| CBR3     | 1.42359  | 0.641837 | 3.157515 | 0.384864 |
| MORC3    | 1.042304 | 0.531321 | 2.044709 | 0.904072 |
| CHAF1B   | 0.355303 | 0.186274 | 0.677714 | 0.001685 |
| HLCS     | 0.366655 | 0.070025 | 1.91984  | 0.234911 |
| SCUBE1   | 1.226028 | 0.729373 | 2.060872 | 0.44187  |
| ARHGAP2  | 1.939531 | 1.222156 | 3.077986 | 0.004933 |
| ADPGK    | 0.283099 | 0.096206 | 0.833061 | 0.021926 |
| PTMS     | 1.449346 | 1.075857 | 1.952495 | 0.014652 |
| PADI4    | 0.976402 | 0.780514 | 1.221451 | 0.834423 |
| ADIPOR1  | 0.977726 | 0.624575 | 1.530559 | 0.921525 |
| CYB5R1   | 1.490449 | 0.703073 | 3.159616 | 0.297876 |
| PSMD4    | 1.585838 | 0.347609 | 7.234803 | 0.551544 |
| ATP13A2  | 1.418296 | 0.762848 | 2.636912 | 0.269402 |
| PSMB4    | 1.057408 | 0.298001 | 3.752043 | 0.93116  |
| IRX6     | 4.71503  | 1.597017 | 13.92065 | 0.004993 |
| BTG2     | 1.518114 | 1.116359 | 2.064454 | 0.007773 |
| HK2      | 0.977002 | 0.518797 | 1.839895 | 0.942567 |
| C1R      | 0.698835 | 0.012678 | 38.51967 | 0.860948 |
| ALDH4A1  | 0.516444 | 0.230728 | 1.155972 | 0.107969 |
| STARD9   | 2.907328 | 0.448306 | 18.85442 | 0.263196 |
| THEM4    | 0.133088 | 0.027994 | 0.632728 | 0.011232 |
| UBR1     | 0.401027 | 0.159001 | 1.011455 | 0.052888 |
| AMFR     | 1.7309   | 0.761949 | 3.932045 | 0.190015 |
| MED8     | 0.787828 | 0.209873 | 2.95737  | 0.723826 |
| RGL4     | 0.855241 | 0.653092 | 1.119961 | 0.255734 |



|           |          |          |          |          |
|-----------|----------|----------|----------|----------|
| RSPRY1    | 0.465921 | 0.250245 | 0.867481 | 0.01603  |
| CCDC17    | 0.161032 | 0.029039 | 0.892988 | 0.036666 |
| GPBP1L1   | 0.794484 | 0.279529 | 2.258096 | 0.665982 |
| NAE1      | 0.126487 | 0.039605 | 0.403962 | 0.000483 |
| TMEM69    | 1.866981 | 0.610306 | 5.71126  | 0.273786 |
| ACE       | 19.13892 | 0.20003  | 1831.221 | 0.204649 |
| SPON2     | 0.986206 | 0.445684 | 2.182269 | 0.972657 |
| CHCHD6    | 1.220018 | 0.575744 | 2.585255 | 0.60374  |
| CTBP1     | 1.246643 | 0.488498 | 3.181424 | 0.644658 |
| LRRC36    | 0.97281  | 0.220986 | 4.282449 | 0.97092  |
| TPPP3     | 1.313978 | 0.6553   | 2.634729 | 0.441743 |
| ZDHH1     | 1.727974 | 0.992997 | 3.006953 | 0.052978 |
| ATP6V0D1  | 1.489788 | 0.928005 | 2.391657 | 0.098823 |
| AGRP      | 2.358216 | 0.654641 | 8.495009 | 0.18951  |
| ZFYVE28   | 0.55728  | 0.080958 | 3.836079 | 0.552492 |
| FAM131B   | 7.763345 | 0.586549 | 102.7527 | 0.119914 |
| RGS12     | 2.96267  | 0.155876 | 56.31041 | 0.46976  |
| PSKH1     | 0.872155 | 0.331582 | 2.29401  | 0.781608 |
| ZYX       | 1.937004 | 1.19764  | 3.132813 | 0.007035 |
| ABR       | 2.147138 | 0.878072 | 5.250368 | 0.093944 |
| CCDC117   | 0.811328 | 0.301646 | 2.182201 | 0.678744 |
| ZNF230    | 0.709754 | 0.198366 | 2.539504 | 0.598126 |
| CCDC107   | 3.524171 | 1.679408 | 7.395331 | 0.000866 |
| ZNF222    | 0.767903 | 0.164392 | 3.587011 | 0.737019 |
| NPR2      | 1.020163 | 0.086822 | 11.987   | 0.98733  |
| ZNF221    | 0.637298 | 0.033006 | 12.30521 | 0.765508 |
| ZNF233    | 0.111655 | 0.010424 | 1.196021 | 0.069984 |
| ZNF235    | 0.709771 | 0.164367 | 3.064929 | 0.646009 |
| GNE       | 0.285781 | 0.121819 | 0.670426 | 0.003989 |
| TNFRSF13I | 1.051333 | 0.269592 | 4.099911 | 0.942526 |
| PTGIR     | 3.491092 | 2.015735 | 6.04629  | 8.14E-06 |
| CALM3     | 0.996671 | 0.515896 | 1.925493 | 0.992082 |
| DFFA      | 0.628914 | 0.233703 | 1.692463 | 0.358521 |
| CCDC28B   | 0.930362 | 0.470495 | 1.839706 | 0.835616 |
| IQCC      | 0.748166 | 0.327425 | 1.709559 | 0.491372 |
| BSDC1     | 0.591727 | 0.273805 | 1.278797 | 0.182037 |
| ZBTB8A    | 1.332424 | 0.788893 | 2.250435 | 0.283165 |
| ATAD3B    | 1.058139 | 0.358274 | 3.125143 | 0.918538 |
| SSU72     | 0.642339 | 0.289786 | 1.423807 | 0.275743 |
| UBE2J2    | 2.035392 | 0.23813  | 17.39729 | 0.516214 |
| ZNF362    | 1.160767 | 0.565009 | 2.384704 | 0.68487  |
| FNDC5     | 4.217985 | 0.204281 | 87.09256 | 0.351447 |
| CPAMD8    | 3.383781 | 0.704473 | 16.25325 | 0.127896 |
| NR2F6     | 1.041783 | 0.527045 | 2.05924  | 0.906274 |
| ANKLE1    | 0.86488  | 0.382013 | 1.958097 | 0.7277   |
| CCDC58    | 0.908478 | 0.614051 | 1.344075 | 0.631018 |
| KALRN     | 0.168586 | 0.002015 | 14.10201 | 0.430543 |
| CILP2     | 0.880846 | 0.179361 | 4.325854 | 0.875837 |
| ABCG1     | 2.699806 | 0.86118  | 8.463918 | 0.088454 |
| TFF3      | 0.848957 | 0.642725 | 1.121363 | 0.248812 |
| UBASH3A   | 0.560749 | 0.179471 | 1.752032 | 0.319633 |
| RSPH1     | 0.394493 | 0.106139 | 1.466231 | 0.164944 |
| SLC37A1   | 0.633001 | 0.343969 | 1.164903 | 0.141706 |
| PDE9A     | 3.092752 | 0.745336 | 12.8333  | 0.119915 |
| WDR4      | 0.851924 | 0.264253 | 2.746513 | 0.788448 |
| NDUFV3    | 0.867546 | 0.396028 | 1.900461 | 0.722494 |
| PKNOX1    | 2.794066 | 0.410886 | 18.99992 | 0.29346  |
| U2AF1     | 0.865192 | 0.398873 | 1.876679 | 0.713966 |

|          |          |          |          |          |
|----------|----------|----------|----------|----------|
| HSF2BP   | 0.060697 | 0.003396 | 1.084699 | 0.05682  |
| RRP1B    | 0.798482 | 0.293494 | 2.172356 | 0.65943  |
| PDXK     | 1.633436 | 1.013404 | 2.632821 | 0.043943 |
| G6PD     | 2.15038  | 0.914953 | 5.053959 | 0.079071 |
| CSTB     | 1.924693 | 1.277581 | 2.899577 | 0.001739 |
| RRP1     | 1.327666 | 0.579546 | 3.041509 | 0.502771 |
| AGPAT3   | 1.772668 | 0.706087 | 4.450376 | 0.222861 |
| TRAPPC10 | 0.900272 | 0.062116 | 13.04805 | 0.938613 |
| GAB3     | 0.308178 | 0.151258 | 0.627891 | 0.001188 |
| ICOSLG   | 2.564883 | 1.265684 | 5.19768  | 0.008955 |
| ZNF66    | 939.4279 | 7.356291 | 119968.7 | 0.005667 |
| LRRC3    | 2.523566 | 0.64229  | 9.915118 | 0.184887 |
| ITGB2    | 1.255796 | 0.738204 | 2.136298 | 0.400777 |
| RALGDS   | 0.997199 | 0.336134 | 2.95836  | 0.995966 |
| FTCD     | 0.055486 | 0.001293 | 2.380246 | 0.131611 |
| LSS      | 2.535318 | 0.749052 | 8.581298 | 0.134788 |
| VAV2     | 3.302133 | 1.539599 | 7.082415 | 0.002152 |
| MCM3AP   | 0.379799 | 0.153431 | 0.940145 | 0.036311 |
| PCNT     | 0.48374  | 0.221232 | 1.05773  | 0.068857 |
| DIP2A    | 0.033492 | 0.003137 | 0.357611 | 0.004938 |
| S100B    | 0.088479 | 0.008605 | 0.909768 | 0.0414   |
| PRMT2    | 0.984561 | 0.305284 | 3.175269 | 0.979222 |
| CLDND2   | 0.668348 | 0.358367 | 1.246458 | 0.205098 |
| ADAMTS1  | 0.244294 | 0.00285  | 20.93981 | 0.534859 |
| SLC2A6   | 1.222676 | 0.947214 | 1.578247 | 0.122689 |
| ZNF761   | 0.488103 | 0.099194 | 2.4018   | 0.377667 |
| ZNF714   | 0.294618 | 0.10706  | 0.810762 | 0.017975 |
| GPSM1    | 1.228111 | 0.605697 | 2.490115 | 0.568849 |
| HIPK4    | 0.028979 | 0.001973 | 0.425552 | 0.009789 |
| TOR2A    | 1.441965 | 0.666375 | 3.120259 | 0.352718 |
| ST6GALNA | 1.833624 | 0.985739 | 3.410818 | 0.055543 |
| SHKBP1   | 1.849654 | 1.124306 | 3.042962 | 0.015467 |
| RDH13    | 1.668107 | 0.992998 | 2.802201 | 0.053185 |
| ZER1     | 2.371419 | 1.027405 | 5.473622 | 0.043041 |
| ZDHHC12  | 1.786908 | 0.991    | 3.222041 | 0.053619 |
| PKN3     | 2.360315 | 1.323378 | 4.209746 | 0.003625 |
| BRSK1    | 1.539036 | 1.151732 | 2.056584 | 0.003556 |
| COX6B2   | 1.183554 | 0.035052 | 39.96308 | 0.925229 |
| TAOK1    | 1.361225 | 0.678584 | 2.730588 | 0.385251 |
| MED27    | 1.159715 | 0.439879 | 3.057517 | 0.764502 |
| DEDD2    | 1.660974 | 0.901467 | 3.060385 | 0.103676 |
| SIK3     | 1.788461 | 0.878322 | 3.641709 | 0.109076 |
| MPZL3    | 0.280631 | 0.02998  | 2.626874 | 0.265455 |
| NEK8     | 0.687046 | 0.27293  | 1.729502 | 0.425514 |
| TLCD1    | 2.280452 | 0.665611 | 7.813057 | 0.189488 |
| PCSK7    | 1.581674 | 0.58401  | 4.283648 | 0.367094 |
| SAFB     | 0.803273 | 0.428057 | 1.507386 | 0.495164 |
| CD3G     | 1.000685 | 0.580738 | 1.724305 | 0.998033 |
| S100A1   | 3.160342 | 1.741118 | 5.736408 | 0.000155 |
| CXCR5    | 1.262917 | 0.528688 | 3.016823 | 0.599309 |
| ZBTB7B   | 1.679051 | 0.720791 | 3.911276 | 0.229704 |
| FLAD1    | 0.333766 | 0.088956 | 1.2523   | 0.103846 |
| SHC1     | 4.820004 | 0.604191 | 38.45212 | 0.1377   |
| VPS11    | 0.454744 | 0.10772  | 1.919715 | 0.283533 |
| NLRX1    | 0.693805 | 0.253715 | 1.897268 | 0.476319 |
| ADAR     | 1.112458 | 0.26409  | 4.686146 | 0.884512 |
| IL6R     | 1.911433 | 1.081257 | 3.379009 | 0.025832 |
| UBE2Q1   | 0.698119 | 0.262818 | 1.854404 | 0.470924 |

|          |          |          |          |          |
|----------|----------|----------|----------|----------|
| CHRN2    | 3.055596 | 0.356285 | 26.20561 | 0.308336 |
| CRTC2    | 2.579707 | 1.074888 | 6.191238 | 0.033868 |
| ANO10    | 1.444851 | 0.614961 | 3.39468  | 0.398453 |
| FDPS     | 0.579485 | 0.228206 | 1.471488 | 0.251156 |
| RUSC1    | 2.328276 | 0.930558 | 5.825391 | 0.070894 |
| FAM189B  | 0.368354 | 0.09174  | 1.479019 | 0.15909  |
| PAQR6    | 1.243265 | 0.429738 | 3.596862 | 0.687884 |
| PMF1     | 1.420847 | 0.528841 | 3.817421 | 0.486066 |
| SLC25A44 | 1.392806 | 0.569254 | 3.40781  | 0.467984 |
| LMNA     | 1.341636 | 1.009926 | 1.782296 | 0.042548 |
| CCR5     | 14.5889  | 0.529438 | 402.0038 | 0.11317  |
| NBEAL2   | 1.14932  | 0.719345 | 1.836304 | 0.560491 |
| CCDC12   | 1.173483 | 0.432482 | 3.184094 | 0.753433 |
| PTH1R    | 1.218774 | 0.628612 | 2.363002 | 0.558092 |
| UBQLN4   | 0.645059 | 0.274407 | 1.516362 | 0.314743 |
| GPATCH4  | 0.340212 | 0.131684 | 0.878957 | 0.025989 |
| FCRL3    | 0.952657 | 0.367649 | 2.468541 | 0.920473 |
| FGFR4    | 1.048795 | 0.012869 | 85.47749 | 0.983071 |
| NACC1    | 10.64994 | 2.375529 | 47.74565 | 0.002    |
| HK3      | 1.096895 | 0.918136 | 1.310459 | 0.308228 |
| IER2     | 1.549854 | 0.950284 | 2.527714 | 0.07915  |
| ZNF394   | 0.800502 | 0.357995 | 1.789981 | 0.587849 |
| CPSF4    | 0.383436 | 0.136885 | 1.074067 | 0.068151 |
| LY6E     | 1.700918 | 1.224682 | 2.362345 | 0.001528 |
| VPS28    | 1.166141 | 0.557077 | 2.441104 | 0.683437 |
| PTGER1   | 1.205713 | 0.794102 | 1.830678 | 0.37996  |
| RECQL4   | 0.558131 | 0.223117 | 1.396172 | 0.212555 |
| LRRC14   | 0.58756  | 0.302542 | 1.14109  | 0.11636  |
| ZNF333   | 0.793265 | 0.178814 | 3.519126 | 0.760606 |
| PPP1R16A | 0.71327  | 0.344452 | 1.476997 | 0.362918 |
| ORAI2    | 1.009791 | 0.451496 | 2.258441 | 0.981072 |
| ALKBH4   | 0.869085 | 0.298577 | 2.529695 | 0.796868 |
| SH2B2    | 2.423721 | 1.294892 | 4.536613 | 0.005641 |
| SQSTM1   | 1.048278 | 0.433188 | 2.53674  | 0.916719 |
| MGAT4B   | 1.25362  | 0.426013 | 3.689004 | 0.681466 |
| RPL8     | 0.807004 | 0.250994 | 2.594704 | 0.718959 |
| MAML1    | 12.64499 | 0.91013  | 175.6846 | 0.058781 |
| LRWD1    | 0.407555 | 0.187379 | 0.886444 | 0.023574 |
| FBXL13   | 0.933113 | 0.362885 | 2.399383 | 0.885762 |
| NAPEPLD  | 0.484045 | 0.159626 | 1.467801 | 0.199865 |
| SCGB3A1  | 0.935028 | 0.590317 | 1.48103  | 0.774659 |
| PSMC2    | 0.314801 | 0.122222 | 0.810817 | 0.016647 |
| USP41    | 0.842387 | 0.044587 | 15.9154  | 0.90893  |
| YDJC     | 0.882777 | 0.451645 | 1.725459 | 0.715379 |
| CCDC116  | 2.576868 | 0.216571 | 30.66084 | 0.453755 |
| DVL3     | 0.743351 | 0.387345 | 1.426557 | 0.372517 |
| AP2M1    | 4.131264 | 1.246883 | 13.68801 | 0.020289 |
| ABCF3    | 1.48651  | 0.477513 | 4.627544 | 0.49384  |
| PCYT1A   | 0.453131 | 0.043492 | 4.721073 | 0.507975 |
| U2AF1L4  | 0.482406 | 0.161098 | 1.444553 | 0.19268  |
| BDH1     | 0.201791 | 0.019638 | 2.073546 | 0.178153 |
| NPHS1    | 0.389673 | 0.018528 | 8.195608 | 0.54424  |
| THAP8    | 5.072899 | 1.006667 | 25.56386 | 0.049066 |
| COX7A1   | 2.428894 | 1.126335 | 5.23781  | 0.023612 |
| ZNF382   | 72.00015 | 3.292605 | 1574.444 | 0.006586 |
| LRRC56   | 1.32066  | 0.681705 | 2.558501 | 0.409746 |
| PLXDC1   | 0.545864 | 0.048022 | 6.20485  | 0.62545  |
| PGAP3    | 0.691537 | 0.308454 | 1.550389 | 0.370563 |

|          |          |          |          |          |
|----------|----------|----------|----------|----------|
| IKZF3    | 1.156891 | 0.219321 | 6.102454 | 0.863622 |
| GRIN2C   | 0.195753 | 0.028007 | 1.36821  | 0.100186 |
| FDXR     | 3.835663 | 0.328518 | 44.78382 | 0.283644 |
| SAP30BP  | 3.065874 | 0.688592 | 13.65043 | 0.141479 |
| ACOX1    | 0.33147  | 0.045491 | 2.415248 | 0.275832 |
| PRPSAP1  | 0.436563 | 0.182332 | 1.045276 | 0.062806 |
| CYGB     | 2.231611 | 1.222694 | 4.073046 | 0.008925 |
| ZNF577   | 2.026364 | 0.589941 | 6.960276 | 0.261969 |
| TMEM143  | 0.718028 | 0.251149 | 2.052818 | 0.536545 |
| KLHL10   | 14.39464 | 0.499996 | 414.4146 | 0.119796 |
| HCRT     | 0.650577 | 0.040318 | 10.49786 | 0.761913 |
| ALDH16A1 | 1.775261 | 0.926191 | 3.402703 | 0.083812 |
| ITGA5    | 1.531778 | 0.900458 | 2.605723 | 0.115684 |
| SIGLEC11 | 1.755201 | 0.558467 | 5.516403 | 0.335604 |
| ZNF385A  | 1.609159 | 1.165945 | 2.220853 | 0.003804 |
| SIGLEC16 | 1.234435 | 0.808957 | 1.883698 | 0.328696 |
| MPP3     | 6.371369 | 1.059565 | 38.31226 | 0.043055 |
| NAGS     | 0.297113 | 0.031567 | 2.796479 | 0.288704 |
| LSM12    | 3.918234 | 0.646797 | 23.7363  | 0.137311 |
| ASB16    | 1.287053 | 0.321799 | 5.147635 | 0.721232 |
| JOSD2    | 1.828813 | 1.141338 | 2.93038  | 0.012089 |
| SHANK1   | 0.608629 | 0.022373 | 16.5572  | 0.76829  |
| DBF4B    | 0.040534 | 0.001327 | 1.237708 | 0.066106 |
| PLCD3    | 4.250422 | 1.141305 | 15.82933 | 0.031007 |
| FMNL3    | 0.143736 | 0.010709 | 1.92922  | 0.14319  |
| RACGAP1  | 0.531196 | 0.230002 | 1.226813 | 0.138524 |
| LARP4    | 1.214993 | 0.381975 | 3.864676 | 0.741515 |
| RAVER1   | 1.317061 | 0.703958 | 2.464135 | 0.388873 |
| SYCE2    | 0.578953 | 0.137727 | 2.433697 | 0.455679 |
| SPC24    | 0.669949 | 0.415552 | 1.080084 | 0.100215 |
| LEMD2    | 0.661398 | 0.261884 | 1.670387 | 0.381809 |
| ALOX15   | 2.654973 | 0.243682 | 28.92652 | 0.422955 |
| TREML1   | 0.99878  | 0.616721 | 1.617522 | 0.996039 |
| ZNF653   | 1.180603 | 0.57165  | 2.438247 | 0.653665 |
| MED11    | 6.649309 | 1.558876 | 28.3623  | 0.010472 |
| CXCL16   | 1.409234 | 0.919487 | 2.159834 | 0.115334 |
| BCL6B    | 0.857519 | 0.158962 | 4.625887 | 0.85813  |
| ASGR2    | 1.348318 | 0.884449 | 2.055474 | 0.164774 |
| TNFSF13  | 2.370328 | 1.279163 | 4.392292 | 0.006101 |
| SEN3     | 0.626925 | 0.158024 | 2.48719  | 0.506636 |
| EIF4A1   | 1.298992 | 0.384692 | 4.386312 | 0.673522 |
| RPL26    | 1.093583 | 0.571308 | 2.093308 | 0.787126 |
| POLR3K   | 0.633992 | 0.254681 | 1.578231 | 0.327406 |
| SNRNP25  | 0.57398  | 0.15013  | 2.194447 | 0.417164 |
| WDR90    | 0.307284 | 0.081254 | 1.162084 | 0.0821   |
| JMJD8    | 0.647324 | 0.291515 | 1.437418 | 0.285294 |
| CCDC78   | 0.02301  | 0.000522 | 1.015129 | 0.050915 |
| MSLNL    | 0.017478 | 0.000846 | 0.360912 | 0.008801 |
| SPSB3    | 0.578045 | 0.255293 | 1.308834 | 0.188677 |
| CCNF     | 0.998049 | 0.669579 | 1.487656 | 0.992351 |
| TBC1D24  | 0.560228 | 0.150491 | 2.085538 | 0.387608 |
| AMDHD2   | 2.34361  | 1.160133 | 4.734377 | 0.017597 |
| NTN3     | 0.037576 | 0.001156 | 1.221683 | 0.064712 |
| PAQR4    | 1.053336 | 0.561913 | 1.974533 | 0.871246 |
| FLYWCH2  | 0.858356 | 0.273711 | 2.691795 | 0.793384 |
| ZNF75A   | 0.543901 | 0.159203 | 1.858181 | 0.33129  |
| ADCY9    | 1.54685  | 1.046639 | 2.286123 | 0.02862  |
| CLPB     | 0.155998 | 0.02199  | 1.106644 | 0.063085 |

|          |          |          |          |          |
|----------|----------|----------|----------|----------|
| NEU3     | 0.047818 | 0.003144 | 0.727319 | 0.028581 |
| ASRGL1   | 0.816752 | 0.423615 | 1.574743 | 0.54564  |
| GNG3     | 1.011821 | 0.114237 | 8.961898 | 0.991575 |
| UBXN1    | 6.022569 | 1.423801 | 25.475   | 0.014681 |
| TTC9C    | 1.753396 | 0.743825 | 4.133226 | 0.199309 |
| TAF6L    | 0.652795 | 0.296691 | 1.436312 | 0.28913  |
| NXF1     | 0.903926 | 0.438927 | 1.861546 | 0.784053 |
| STX5     | 2.535897 | 0.70273  | 9.151132 | 0.155265 |
| SLC25A45 | 0.068713 | 0.004654 | 1.014411 | 0.05123  |
| RPL29    | 0.789281 | 0.420747 | 1.480614 | 0.460974 |
| ITIH3    | 0.660661 | 0.104295 | 4.184984 | 0.659864 |
| SYVN1    | 2.582009 | 0.78925  | 8.44697  | 0.116743 |
| ZFPL1    | 1.167414 | 0.475652 | 2.865234 | 0.735441 |
| RPS6KA4  | 2.386754 | 1.451414 | 3.924858 | 0.000608 |
| LRP5     | 1.594689 | 0.850596 | 2.989707 | 0.145576 |
| TPCN2    | 0.938484 | 0.49217  | 1.789531 | 0.847122 |
| PDZK1IP1 | 1.148526 | 0.792125 | 1.665284 | 0.465047 |
| TAL1     | 1.060741 | 0.684757 | 1.643169 | 0.791721 |
| CMPK1    | 0.539364 | 0.295123 | 0.985736 | 0.044786 |
| BEND5    | 0.790768 | 0.522485 | 1.196806 | 0.266883 |
| ZYG11B   | 0.75688  | 0.366319 | 1.563848 | 0.451866 |
| MAGOH    | 0.397376 | 0.162882 | 0.969459 | 0.042547 |
| ACOT11   | 1.02311  | 0.337695 | 3.099706 | 0.967776 |
| FAM151A  | 0.786662 | 0.021641 | 28.59549 | 0.895864 |
| PARS2    | 2.081271 | 0.678649 | 6.382815 | 0.199854 |
| USP24    | 0.486146 | 0.272036 | 0.868775 | 0.014898 |
| NOL9     | 0.859972 | 0.220551 | 3.3532   | 0.827988 |
| KLHL21   | 1.102396 | 0.555987 | 2.185804 | 0.780139 |
| ZSWIM5   | 2.964712 | 0.72683  | 12.09294 | 0.129737 |
| GMEB1    | 0.740256 | 0.227459 | 2.40913  | 0.617395 |
| JAK1     | 0.830026 | 0.511633 | 1.346559 | 0.45046  |
| RAVER2   | 0.572018 | 0.350915 | 0.932434 | 0.025054 |
| CTRC     | 4.169769 | 0.567613 | 30.63176 | 0.160508 |
| LZIC     | 0.488798 | 0.1595   | 1.497956 | 0.2103   |
| RBP7     | 1.803029 | 0.968176 | 3.357771 | 0.063166 |
| FBLIM1   | 0.423699 | 0.005832 | 30.78181 | 0.694523 |
| SLC25A34 | 0.233538 | 0.072521 | 0.752063 | 0.014789 |
| AKR7A3   | 1.606875 | 0.480747 | 5.370904 | 0.441088 |
| DHRS3    | 0.785785 | 0.60182  | 1.025984 | 0.076483 |
| MATN1    | 2.700139 | 0.420249 | 17.34864 | 0.295298 |
| LAPTM5   | 1.588268 | 0.85361  | 2.955209 | 0.144195 |
| SDC3     | 2.588018 | 0.031504 | 212.6022 | 0.672476 |
| PEF1     | 2.5312   | 1.022592 | 6.265426 | 0.044614 |
| RBBP4    | 0.401981 | 0.140211 | 1.152466 | 0.089905 |
| KIAA1522 | 2.581506 | 1.479979 | 4.502885 | 0.000835 |
| TSSK3    | 0.849691 | 0.05819  | 12.40722 | 0.90522  |
| TMCO4    | 0.848459 | 0.246482 | 2.920635 | 0.794432 |
| UBXN10   | 0.163208 | 0.022851 | 1.165692 | 0.070743 |
| CAMK2N1  | 1.600961 | 0.641407 | 3.996025 | 0.313269 |
| ALPL     | 1.034271 | 0.798955 | 1.338896 | 0.798073 |
| WNT4     | 0.176925 | 0.00723  | 4.329335 | 0.288373 |
| TTLL10   | 1.418692 | 0.362572 | 5.551141 | 0.615355 |
| SCNN1D   | 0.577274 | 0.29259  | 1.138949 | 0.113033 |
| MXRA8    | 2.206496 | 0.101787 | 47.83137 | 0.614105 |
| MEGF6    | 0.547114 | 0.338923 | 0.883189 | 0.013574 |
| IL23R    | 6.068748 | 0.119664 | 307.7753 | 0.36805  |
| NFIA     | 1.030239 | 0.723051 | 1.467937 | 0.869014 |
| OMA1     | 0.534645 | 0.230626 | 1.239434 | 0.144402 |

|          |          |          |          |          |
|----------|----------|----------|----------|----------|
| MYSM1    | 0.629746 | 0.077569 | 5.112595 | 0.665154 |
| TM2D1    | 0.191553 | 0.062575 | 0.586381 | 0.003791 |
| USP1     | 0.99851  | 0.207754 | 4.799058 | 0.998515 |
| FUBP1    | 0.51011  | 0.21274  | 1.223148 | 0.131415 |
| NEXN     | 0.785541 | 0.450784 | 1.36889  | 0.394299 |
| DNAJB4   | 0.798216 | 0.282264 | 2.25728  | 0.670889 |
| TYW3     | 0.655353 | 0.341469 | 1.257762 | 0.203914 |
| B3GALT2  | 3.55642  | 0.288074 | 43.9058  | 0.322455 |
| FAM102B  | 0.713196 | 0.395984 | 1.284515 | 0.260201 |
| GBP2     | 1.335816 | 1.008023 | 1.770201 | 0.043843 |
| ATXN7L2  | 0.847794 | 0.381391 | 1.884559 | 0.685379 |
| GBP4     | 1.132836 | 0.84164  | 1.524783 | 0.410662 |
| ZNF326   | 0.498091 | 0.118529 | 2.093111 | 0.341335 |
| GFI1     | 1.228728 | 0.788928 | 1.913703 | 0.362195 |
| AGL      | 0.210025 | 0.010765 | 4.097644 | 0.303245 |
| VCAM1    | 1.330896 | 0.693179 | 2.555304 | 0.39041  |
| EXTL2    | 0.856806 | 0.414015 | 1.773165 | 0.677068 |
| SLC30A7  | 0.691421 | 0.369603 | 1.29345  | 0.248195 |
| ZNF281   | 0.640866 | 0.336358 | 1.221048 | 0.176129 |
| ARPC5    | 0.82017  | 0.465621 | 1.444692 | 0.492515 |
| NLRP3    | 1.495166 | 1.000716 | 2.233922 | 0.049593 |
| ZNF496   | 0.05279  | 0.003728 | 0.747479 | 0.029615 |
| TRIM58   | 1.00134  | 0.700061 | 1.432278 | 0.99415  |
| SLAMF9   | 3.213183 | 0.41788  | 24.70698 | 0.262048 |
| KCNJ9    | 0.981733 | 0.076533 | 12.59317 | 0.988701 |
| IGSF8    | 3.195955 | 1.008903 | 10.12399 | 0.048265 |
| DDR2     | 2.785881 | 0.144605 | 53.6714  | 0.497264 |
| PEA15    | 1.710229 | 1.159189 | 2.523216 | 0.006842 |
| PEX19    | 0.330865 | 0.085588 | 1.279061 | 0.108889 |
| NCSTN    | 0.741373 | 0.319155 | 1.722157 | 0.486494 |
| VANGL2   | 1.322984 | 0.791281 | 2.211966 | 0.285845 |
| SLAMF6   | 0.712892 | 0.422133 | 1.203921 | 0.205577 |
| OLFML2B  | 1.525464 | 1.011594 | 2.30037  | 0.043908 |
| FCRLB    | 0.696791 | 0.357557 | 1.357873 | 0.288561 |
| FCGR3B   | 1.538155 | 0.89887  | 2.632106 | 0.116188 |
| KLHDC9   | 1.510991 | 0.463067 | 4.930374 | 0.493936 |
| FLVCR1   | 0.481776 | 0.120424 | 1.927434 | 0.30191  |
| ATF3     | 1.036256 | 0.606357 | 1.770946 | 0.896367 |
| RBM15    | 0.633641 | 0.273845 | 1.466161 | 0.286429 |
| DENND2D  | 0.494224 | 0.243105 | 1.004742 | 0.051547 |
| IER5     | 1.248365 | 0.870014 | 1.791253 | 0.22854  |
| SNED1    | 3.947635 | 0.0773   | 201.6016 | 0.49382  |
| BPNT1    | 0.436434 | 0.193785 | 0.982919 | 0.045332 |
| ACP6     | 1.405365 | 0.77987  | 2.532541 | 0.257415 |
| KIF26B   | 1.156562 | 0.27932  | 4.788902 | 0.84098  |
| TFB2M    | 0.673872 | 0.340808 | 1.332429 | 0.256451 |
| KLHDC8A  | 0.269366 | 0.046307 | 1.56688  | 0.14427  |
| PM20D1   | 0.619045 | 0.081184 | 4.720353 | 0.643581 |
| PKDCC    | 0.838532 | 0.16591  | 4.238061 | 0.831303 |
| OXER1    | 1.696075 | 0.563172 | 5.107977 | 0.347616 |
| HAAO     | 2.42924  | 0.50965  | 11.57894 | 0.265282 |
| B3GALNT2 | 0.420529 | 0.094478 | 1.871809 | 0.255512 |
| MAPKAPK  | 2.833658 | 0.74435  | 10.78743 | 0.126738 |
| IL24     | 0.821796 | 0.015134 | 44.62572 | 0.923284 |
| PIGR     | 0.511967 | 0.04711  | 5.563752 | 0.582315 |
| CAPN2    | 1.793757 | 0.962103 | 3.344305 | 0.066002 |
| MRPL55   | 1.73838  | 0.664684 | 4.546468 | 0.259621 |
| WDR26    | 0.864768 | 0.495736 | 1.508514 | 0.608797 |

|           |          |          |          |          |
|-----------|----------|----------|----------|----------|
| REL       | 0.808884 | 0.406916 | 1.607933 | 0.545137 |
| PUS10     | 0.849214 | 0.221203 | 3.260191 | 0.811778 |
| PEX13     | 3.715756 | 0.715102 | 19.30751 | 0.118492 |
| KIAA1841  | 2.645329 | 0.292644 | 23.91218 | 0.386474 |
| TRIM17    | 0.455325 | 0.043437 | 4.772966 | 0.511666 |
| RFTN2     | 0.733357 | 0.285064 | 1.886643 | 0.520057 |
| DISC1     | 0.416326 | 0.051758 | 3.348772 | 0.410062 |
| MEMO1     | 0.796348 | 0.303916 | 2.086664 | 0.643126 |
| DPY30     | 0.625003 | 0.153569 | 2.543672 | 0.511634 |
| ARL5A     | 0.606306 | 0.210866 | 1.74332  | 0.353118 |
| DUSP19    | 1.041394 | 0.639837 | 1.694965 | 0.870358 |
| NUP35     | 0.671776 | 0.263726 | 1.711185 | 0.404324 |
| CCDC138   | 0.311421 | 0.084879 | 1.142604 | 0.078583 |
| FBXO41    | 0.215351 | 0.061725 | 0.75133  | 0.016022 |
| SMC6      | 0.710046 | 0.330599 | 1.525005 | 0.379959 |
| CCDC74A   | 1.086475 | 0.401824 | 2.937672 | 0.870183 |
| SLC16A14  | 1.418323 | 0.300552 | 6.693149 | 0.658887 |
| SGCB      | 1.264815 | 0.191282 | 8.363343 | 0.807417 |
| NOSTRIN   | 0.563938 | 0.051534 | 6.171162 | 0.638916 |
| SGPP2     | 1.349535 | 0.609581 | 2.987698 | 0.459752 |
| BBS5      | 2.927767 | 0.110747 | 77.40019 | 0.520262 |
| SMARCAD   | 0.732092 | 0.393542 | 1.361884 | 0.324778 |
| HPGDS     | 0.562099 | 0.340045 | 0.929159 | 0.024672 |
| PDLIM5    | 0.15529  | 0.0274   | 0.880104 | 0.035356 |
| RPRD2     | 0.546822 | 0.228625 | 1.307881 | 0.174877 |
| ANKRD23   | 0.420252 | 0.039357 | 4.487429 | 0.473085 |
| CTSS      | 1.159973 | 0.867281 | 1.551443 | 0.317206 |
| MSX1      | 0.546983 | 0.161838 | 1.848697 | 0.331541 |
| PACRGL    | 0.29415  | 0.026436 | 3.273023 | 0.319533 |
| BNIP1     | 0.487069 | 0.006465 | 36.69547 | 0.744262 |
| C1QTNF7   | 0.660255 | 0.066197 | 6.585409 | 0.723521 |
| TNFAIP8L2 | 1.774977 | 1.097244 | 2.871326 | 0.019381 |
| LYSMD1    | 0.014872 | 0.001275 | 0.173509 | 0.000787 |
| SCNM1     | 1.523143 | 0.51459  | 4.508377 | 0.447264 |
| TMOD4     | 0.286679 | 0.056293 | 1.459947 | 0.132492 |
| VPS72     | 1.153858 | 0.654966 | 2.032761 | 0.620373 |
| ERCC3     | 0.420077 | 0.167753 | 1.051932 | 0.064045 |
| RNF149    | 1.287467 | 0.746124 | 2.221576 | 0.363987 |
| IWS1      | 0.625146 | 0.342912 | 1.139672 | 0.125214 |
| BOLA3     | 0.482619 | 0.174216 | 1.336968 | 0.161108 |
| CDC42EP3  | 1.131943 | 0.575865 | 2.224991 | 0.719274 |
| S100A11   | 1.332247 | 1.003362 | 1.768935 | 0.047348 |
| DHX57     | 1.526646 | 0.064271 | 36.26268 | 0.7935   |
| ARHGAP21  | 2.206386 | 0.664985 | 7.320673 | 0.195932 |
| S100A9    | 1.118521 | 0.858242 | 1.457735 | 0.407217 |
| S100A12   | 0.990606 | 0.843408 | 1.163495 | 0.908452 |
| TGFA      | 0.678506 | 0.326356 | 1.41064  | 0.298966 |
| TDRD10    | 3.416156 | 0.667711 | 17.4778  | 0.140207 |
| CCNYL1    | 2.392099 | 0.705804 | 8.107265 | 0.161366 |
| FZD5      | 1.85545  | 0.637605 | 5.399417 | 0.256712 |
| DCAF16    | 0.551938 | 0.246343 | 1.236632 | 0.148755 |
| NPPC      | 0.186412 | 0.009839 | 3.531949 | 0.263047 |
| GNPDA2    | 0.745515 | 0.22555  | 2.464166 | 0.630189 |
| PAQR3     | 0.571038 | 0.280904 | 1.160838 | 0.121639 |
| ANTXR2    | 1.185152 | 0.753819 | 1.86329  | 0.461838 |
| HELQ      | 0.453735 | 0.161997 | 1.270861 | 0.132626 |
| MRPS18C   | 0.540955 | 0.210428 | 1.390656 | 0.202163 |
| CGGBP1    | 0.314256 | 0.100656 | 0.981125 | 0.046287 |

|          |          |          |          |          |
|----------|----------|----------|----------|----------|
| GPR155   | 0.378956 | 0.033576 | 4.277028 | 0.432623 |
| DAPL1    | 1.583089 | 0.976066 | 2.567625 | 0.062634 |
| PMVK     | 1.218371 | 0.653281 | 2.272268 | 0.53452  |
| PBXIP1   | 1.351786 | 0.69856  | 2.615843 | 0.370834 |
| PYGO2    | 1.938551 | 0.74316  | 5.056761 | 0.176008 |
| HIPK1    | 0.020792 | 0.000659 | 0.655821 | 0.02784  |
| LENEP    | 1.202409 | 0.126752 | 11.40641 | 0.872426 |
| DCST2    | 0.484738 | 0.026773 | 8.776253 | 0.624093 |
| DCST1    | 6.938709 | 1.016752 | 47.35245 | 0.048051 |
| COL6A3   | 3.50765  | 0.752906 | 16.34149 | 0.10994  |
| YY1AP1   | 0.160336 | 0.01248  | 2.059867 | 0.159958 |
| KBTBD8   | 2.057575 | 1.145821 | 3.694829 | 0.015705 |
| LMOD3    | 1.015144 | 0.619757 | 1.662775 | 0.952396 |
| SLC22A15 | 0.885281 | 0.666876 | 1.175215 | 0.39923  |
| ATP1A1   | 1.570835 | 0.58941  | 4.186429 | 0.366539 |
| SLC15A2  | 0.652768 | 0.284195 | 1.499345 | 0.31474  |
| EIF4E3   | 0.979106 | 0.668581 | 1.433855 | 0.91361  |
| PROK2    | 0.87132  | 0.7172   | 1.05856  | 0.165458 |
| LRRC58   | 0.485805 | 0.220288 | 1.071356 | 0.07359  |
| FSTL1    | 1.433893 | 0.748302 | 2.74762  | 0.27742  |
| ELF3     | 1.213044 | 0.353974 | 4.157016 | 0.758589 |
| TMEM183  | 0.506939 | 0.096408 | 2.66562  | 0.422424 |
| IGFBP7   | 0.796159 | 0.59961  | 1.057136 | 0.11506  |
| TRIM46   | 1.410589 | 0.902008 | 2.205924 | 0.131579 |
| KRTCAP2  | 0.423425 | 0.138303 | 1.296349 | 0.132241 |
| CXCR1    | 1.025742 | 0.404226 | 2.602871 | 0.957337 |
| ARPC2    | 0.444202 | 0.045291 | 4.356567 | 0.486049 |
| CCT3     | 0.916989 | 0.383656 | 2.191728 | 0.84545  |
| TMEM79   | 0.966895 | 0.467271 | 2.000737 | 0.927702 |
| SSR2     | 0.63259  | 0.158101 | 2.531112 | 0.517442 |
| RNF25    | 5.849214 | 1.705    | 20.06646 | 0.004981 |
| STK36    | 0.785386 | 0.385746 | 1.599058 | 0.505442 |
| NEK10    | 1.959089 | 0.279269 | 13.74311 | 0.498667 |
| CCDC141  | 0.37859  | 0.029201 | 4.908348 | 0.457488 |
| FEV      | 1.582602 | 0.802224 | 3.122106 | 0.185412 |
| EOMES    | 0.941791 | 0.619838 | 1.430971 | 0.778723 |
| CWC22    | 2.46964  | 0.719255 | 8.479775 | 0.150891 |
| AZI2     | 0.587642 | 0.295713 | 1.167765 | 0.129185 |
| TGFBR2   | 1.89494  | 0.947135 | 3.791218 | 0.070846 |
| ANKZF1   | 3.042584 | 0.30795  | 30.06109 | 0.341034 |
| HDAC11   | 10.55218 | 2.918185 | 38.15674 | 0.000327 |
| TRAT1    | 0.63888  | 0.276822 | 1.474475 | 0.293728 |
| FBLN2    | 1.884131 | 1.065366 | 3.332142 | 0.029434 |
| GLB1L    | 0.663185 | 0.264405 | 1.663411 | 0.381376 |
| STT3B    | 0.798521 | 0.445476 | 1.431358 | 0.44989  |
| CHCHD4   | 0.632651 | 0.30095  | 1.329943 | 0.227134 |
| FCRL1    | 1.334662 | 0.088589 | 20.10767 | 0.834764 |
| SERPINI1 | 0.483962 | 0.12008  | 1.950522 | 0.307484 |
| CLASP2   | 0.680765 | 0.380767 | 1.217123 | 0.194579 |
| SUCLG1   | 0.464769 | 0.177073 | 1.219892 | 0.119647 |
| NUAK2    | 1.557972 | 1.013171 | 2.395724 | 0.043429 |
| SPTA1    | 0.918688 | 0.738758 | 1.14244  | 0.445717 |
| PRKCI    | 0.159936 | 0.052239 | 0.489667 | 0.001324 |
| MNDA     | 1.164777 | 0.913486 | 1.485194 | 0.218632 |
| PYHIN1   | 0.719914 | 0.466544 | 1.110883 | 0.137587 |
| IFI16    | 1.192708 | 0.824044 | 1.726307 | 0.350243 |
| AIM2     | 1.021189 | 0.513731 | 2.02991  | 0.9523   |
| EFHB     | 1.889956 | 0.226559 | 15.76604 | 0.556439 |



|          |          |          |          |          |
|----------|----------|----------|----------|----------|
| EIF5A2   | 0.516182 | 0.110731 | 2.406225 | 0.399796 |
| RPL22L1  | 0.871176 | 0.548231 | 1.384357 | 0.559476 |
| PPM1L    | 1.403033 | 0.1255   | 15.6853  | 0.783367 |
| ICA1L    | 0.175212 | 0.013584 | 2.260022 | 0.181875 |
| CTLA4    | 1.060325 | 0.457847 | 2.455598 | 0.891263 |
| ICOS     | 1.182906 | 0.72287  | 1.93571  | 0.503832 |
| RYBP     | 1.101289 | 0.628285 | 1.930393 | 0.736168 |
| PPP4R2   | 0.903294 | 0.277494 | 2.94039  | 0.865877 |
| CD200R1  | 4.412397 | 0.887558 | 21.93573 | 0.069649 |
| GTPBP8   | 1.184652 | 0.363348 | 3.862408 | 0.7787   |
| WDFY3    | 0.803714 | 0.078946 | 8.182247 | 0.853571 |
| COX18    | 0.256362 | 0.024428 | 2.690404 | 0.256444 |
| PTPN13   | 0.724103 | 0.074284 | 7.058364 | 0.781113 |
| THOC7    | 0.252524 | 0.105202 | 0.606155 | 0.002066 |
| ATXN7    | 0.409629 | 0.051243 | 3.274514 | 0.400049 |
| PSMD6    | 0.266186 | 0.09014  | 0.786059 | 0.01659  |
| ADAMTS9  | 0.278035 | 0.016096 | 4.80254  | 0.378571 |
| PPM1K    | 0.735646 | 0.154899 | 3.493728 | 0.699334 |
| GMPS     | 0.646819 | 0.346705 | 1.206717 | 0.170881 |
| TIPARP   | 0.755615 | 0.502036 | 1.137277 | 0.17917  |
| CCNL1    | 0.668729 | 0.449314 | 0.995293 | 0.047343 |
| PTX3     | 1.322589 | 0.656887 | 2.662926 | 0.433612 |
| HESX1    | 1.436324 | 0.739634 | 2.789254 | 0.284936 |
| SLMAP    | 0.54621  | 0.228607 | 1.30506  | 0.173565 |
| RPL9     | 1.171575 | 0.501435 | 2.737323 | 0.714576 |
| RPP14    | 1.006483 | 0.205701 | 4.924658 | 0.993636 |
| ABHD6    | 2.903971 | 1.413889 | 5.964433 | 0.003695 |
| DNASE1L3 | 1.281989 | 0.56615  | 2.902935 | 0.551368 |
| RBM47    | 1.221167 | 0.964605 | 1.545969 | 0.096818 |
| APBB2    | 0.129067 | 0.004838 | 3.442888 | 0.22169  |
| IL17RE   | 0.414871 | 0.033547 | 5.130593 | 0.49295  |
| IL17RC   | 16.77873 | 1.384852 | 203.2894 | 0.026706 |
| CRELD1   | 0.183823 | 0.033942 | 0.995549 | 0.049398 |
| PRRT3    | 1.092701 | 0.636371 | 1.876256 | 0.747909 |
| PCOLCE2  | 1.021757 | 0.821576 | 1.270712 | 0.846599 |
| MTMR14   | 1.384098 | 0.527408 | 3.632345 | 0.509057 |
| TTC14    | 0.881823 | 0.464274 | 1.674898 | 0.700804 |
| CXCL3    | 3.119806 | 0.567244 | 17.15873 | 0.190835 |
| CXCL5    | 1.223601 | 0.628516 | 2.382115 | 0.552714 |
| PPBP     | 1.075705 | 0.932588 | 1.240786 | 0.316421 |
| PF4      | 0.946728 | 0.154263 | 5.810175 | 0.952843 |
| MTHFD2L  | 0.377759 | 0.123819 | 1.152505 | 0.087162 |
| CXCL1    | 1.088384 | 0.820317 | 1.444051 | 0.55716  |
| RCHY1    | 0.807845 | 0.117933 | 5.533759 | 0.827939 |
| CPA3     | 1.09091  | 0.932126 | 1.276743 | 0.278287 |
| GYG1     | 0.940066 | 0.575413 | 1.535809 | 0.805078 |
| HPS3     | 0.648009 | 0.311919 | 1.346231 | 0.244833 |
| TOPBP1   | 0.510628 | 0.2654   | 0.982445 | 0.044114 |
| RYK      | 0.450452 | 0.1929   | 1.051876 | 0.065317 |
| SNRK     | 0.926719 | 0.475572 | 1.805841 | 0.823078 |
| TCF23    | 0.435268 | 0.025408 | 7.4566   | 0.56606  |
| UCN      | 0.46302  | 0.211575 | 1.013295 | 0.05399  |
| ZNF513   | 3.624855 | 1.334047 | 9.849408 | 0.011567 |
| SLC4A1AP | 0.503337 | 0.145631 | 1.739655 | 0.277955 |
| PLB1     | 0.918721 | 0.460528 | 1.832781 | 0.809874 |
| SPDYA    | 0.128015 | 0.000801 | 20.44809 | 0.427132 |
| KIAA1143 | 1.018073 | 0.19484  | 5.319615 | 0.983061 |
| KIF15    | 0.873824 | 0.446038 | 1.711892 | 0.694243 |

|         |          |          |          |          |
|---------|----------|----------|----------|----------|
| TGM4    | 0.061004 | 0.005056 | 0.736029 | 0.027723 |
| WDR43   | 0.443023 | 0.174588 | 1.124181 | 0.086604 |
| ZDHHC3  | 1.072351 | 0.405268 | 2.837471 | 0.888106 |
| CDCP1   | 1.787041 | 0.435347 | 7.335559 | 0.420378 |
| CLEC3B  | 1.40332  | 0.950293 | 2.072316 | 0.088451 |
| LZTFL1  | 0.597722 | 0.311717 | 1.146143 | 0.121306 |
| FYCO1   | 0.771918 | 0.387001 | 1.539679 | 0.46242  |
| CCR1    | 1.453892 | 1.12849  | 1.873124 | 0.003791 |
| LRRC2   | 0.294047 | 0.006127 | 14.11133 | 0.535426 |
| FBXO40  | 4.769959 | 0.387682 | 58.68865 | 0.222459 |
| DTX3L   | 1.149272 | 0.477585 | 2.765638 | 0.75616  |
| ZNF148  | 0.64953  | 0.340119 | 1.240418 | 0.191125 |
| NMNAT3  | 0.310025 | 0.15134  | 0.635097 | 0.001371 |
| ZMYM6   | 0.386648 | 0.092749 | 1.611848 | 0.192038 |
| YEATS2  | 0.706854 | 0.358013 | 1.395598 | 0.317511 |
| ZC3H12A | 1.193411 | 0.85036  | 1.674855 | 0.306522 |
| MEAF6   | 0.599031 | 0.135208 | 2.653981 | 0.499834 |
| SNIP1   | 0.878516 | 0.49262  | 1.566706 | 0.66079  |
| DNALI1  | 0.257412 | 0.025995 | 2.549004 | 0.246013 |
| POLR2H  | 0.419068 | 0.149254 | 1.176637 | 0.098707 |
| LIPH    | 0.271125 | 0.024358 | 3.017795 | 0.288425 |
| TMEM41A | 1.371778 | 0.593375 | 3.171311 | 0.459725 |
| RPN1    | 0.454446 | 0.183794 | 1.123653 | 0.08772  |
| SENP2   | 0.417369 | 0.177099 | 0.983611 | 0.045744 |
| HEYL    | 2.426573 | 1.149366 | 5.123047 | 0.020067 |
| IFT122  | 0.29899  | 0.07205  | 1.240732 | 0.096337 |
| RFC4    | 0.397925 | 0.21266  | 0.744591 | 0.003945 |
| RPL39L  | 1.177963 | 0.724453 | 1.915373 | 0.509025 |
| BAP1    | 0.363315 | 0.129608 | 1.018438 | 0.054201 |
| TKT     | 1.294012 | 0.657475 | 2.546816 | 0.455612 |
| PRKCD   | 1.550801 | 0.716722 | 3.355532 | 0.265197 |
| RFT1    | 0.075966 | 0.010631 | 0.542819 | 0.010202 |
| SFMBT1  | 0.100696 | 0.02817  | 0.359945 | 0.000412 |
| GNL3    | 0.45539  | 0.199162 | 1.041265 | 0.062303 |
| PBRM1   | 0.05979  | 0.005513 | 0.648399 | 0.020547 |
| ARHGEF3 | 1.630043 | 1.103571 | 2.407676 | 0.014082 |
| SLBP    | 0.561483 | 0.21599  | 1.459621 | 0.23637  |
| LRPAP1  | 1.220812 | 0.807572 | 1.845511 | 0.344001 |
| ZDHHC19 | 0.567032 | 0.201032 | 1.59938  | 0.283569 |
| UBXN7   | 0.801668 | 0.174368 | 3.685715 | 0.7764   |
| RNF168  | 1.930184 | 0.234583 | 15.88182 | 0.540828 |
| PIGX    | 0.652835 | 0.302642 | 1.408242 | 0.27696  |
| S100P   | 0.942889 | 0.779878 | 1.139973 | 0.543699 |
| CLDN19  | 0.902795 | 0.04162  | 19.58275 | 0.948064 |
| ERMAP   | 0.855994 | 0.342874 | 2.137016 | 0.739056 |
| ZNF691  | 2.203811 | 0.701632 | 6.922123 | 0.176004 |
| SGMS2   | 1.541349 | 0.819777 | 2.898054 | 0.179246 |
| METAP1  | 0.378611 | 0.191246 | 0.749538 | 0.005314 |
| DNAJB14 | 0.548571 | 0.142461 | 2.112374 | 0.382738 |
| EMCN    | 0.061343 | 0.002451 | 1.535238 | 0.089314 |
| BDH2    | 0.351608 | 0.060091 | 2.057355 | 0.246209 |
| PGRMC2  | 0.902234 | 0.429027 | 1.897375 | 0.786188 |
| CDC25A  | 0.452494 | 0.191625 | 1.068497 | 0.070476 |
| CAMP    | 0.886852 | 0.761167 | 1.033292 | 0.12357  |
| ZNF589  | 0.513222 | 0.170083 | 1.548635 | 0.236501 |
| PLXNB1  | 1.00268  | 0.653819 | 1.537685 | 0.99021  |
| CCDC51  | 1.31021  | 0.439984 | 3.901615 | 0.627466 |
| ATRIP   | 0.552555 | 0.210448 | 1.450799 | 0.228424 |

|          |          |          |          |          |
|----------|----------|----------|----------|----------|
| SHISA5   | 2.588604 | 1.467287 | 4.566845 | 0.001025 |
| SPRY1    | 0.849218 | 0.558962 | 1.290196 | 0.443722 |
| APEH     | 1.04403  | 0.521047 | 2.091938 | 0.903286 |
| INTU     | 1.922711 | 0.366344 | 10.0911  | 0.439619 |
| RNF123   | 0.659201 | 0.291346 | 1.49151  | 0.31716  |
| HSPA4L   | 0.334036 | 0.068459 | 1.629872 | 0.175131 |
| MFSD8    | 0.051862 | 0.005226 | 0.514676 | 0.011497 |
| CAMKV    | 1.109756 | 0.797303 | 1.544656 | 0.537048 |
| MON1A    | 2.164371 | 0.857727 | 5.461531 | 0.102051 |
| MST1R    | 1.432902 | 0.383004 | 5.360798 | 0.593112 |
| RAD54L2  | 0.684187 | 0.266924 | 1.753726 | 0.42937  |
| TEX264   | 1.10419  | 0.486856 | 2.504305 | 0.81249  |
| GRM2     | 0.479572 | 0.083667 | 2.748862 | 0.409433 |
| DUSP7    | 4.0243   | 1.323685 | 12.23478 | 0.014118 |
| PPM1M    | 1.248057 | 0.867048 | 1.796494 | 0.233133 |
| WDR82    | 1.55186  | 0.729106 | 3.303045 | 0.254193 |
| NDST3    | 0.572898 | 0.051308 | 6.396954 | 0.650918 |
| HMGB2    | 0.737304 | 0.464027 | 1.171521 | 0.197078 |
| SAP30    | 1.059022 | 0.741842 | 1.511815 | 0.752193 |
| SCRG1    | 1.518458 | 0.168323 | 13.69818 | 0.709748 |
| MAD2L1   | 0.625485 | 0.336422 | 1.162919 | 0.138087 |
| ANXA5    | 1.231364 | 1.00936  | 1.502196 | 0.040188 |
| MAP9     | 1.207941 | 0.162927 | 8.955663 | 0.853367 |
| FBXO8    | 2.194108 | 1.001314 | 4.807794 | 0.049618 |
| HPGD     | 0.782558 | 0.488721 | 1.25306  | 0.307358 |
| TMEM144  | 1.268817 | 0.795538 | 2.023659 | 0.317501 |
| IL15     | 2.467049 | 0.560538 | 10.85801 | 0.232339 |
| FAM160A1 | 0.269556 | 0.024436 | 2.973548 | 0.284491 |
| ARFIP1   | 1.498582 | 0.363438 | 6.179175 | 0.575715 |
| HHIP     | 0.500174 | 0.072117 | 3.469001 | 0.48322  |
| ANAPC10  | 1.127581 | 0.576329 | 2.2061   | 0.725848 |
| ABCE1    | 0.659588 | 0.384111 | 1.132634 | 0.131429 |
| OTUD4    | 0.790578 | 0.150453 | 4.154213 | 0.781317 |
| LSM6     | 1.043151 | 0.566499 | 1.920857 | 0.892121 |
| TMEM184A | 1.733847 | 0.576732 | 5.212518 | 0.32711  |
| ITGA2    | 1.187397 | 0.311678 | 4.523614 | 0.801279 |
| MOCS2    | 0.215035 | 0.042139 | 1.097325 | 0.064562 |
| EDIL3    | 1.604333 | 0.124654 | 20.64822 | 0.716881 |
| TMEM161A | 0.430129 | 0.066969 | 2.762652 | 0.373961 |
| ELOVL7   | 1.340422 | 0.450542 | 3.987934 | 0.598412 |
| NDUFAF2  | 0.742519 | 0.367928 | 1.498483 | 0.405974 |
| LMBRD2   | 0.303259 | 0.030572 | 3.008223 | 0.30811  |
| NIPBL    | 0.393974 | 0.103431 | 1.500673 | 0.172225 |
| SLC25A46 | 0.508455 | 0.248418 | 1.040691 | 0.064195 |
| STARD4   | 1.238166 | 0.183272 | 8.364928 | 0.826516 |
| PGGT1B   | 0.492561 | 0.113322 | 2.140944 | 0.344883 |
| F2RL2    | 0.088924 | 0.001122 | 7.049859 | 0.278086 |
| CCDC112  | 0.387552 | 0.179115 | 0.838546 | 0.016079 |
| CMBL     | 0.892515 | 0.617452 | 1.290115 | 0.545246 |
| PRRC1    | 0.737021 | 0.333803 | 1.627306 | 0.450209 |
| F2RL1    | 1.394935 | 1.064179 | 1.828494 | 0.015934 |
| AGGF1    | 0.396355 | 0.154244 | 1.018498 | 0.054618 |
| WDR41    | 0.35017  | 0.175546 | 0.698498 | 0.002897 |
| NDUFS4   | 0.385648 | 0.162439 | 0.915574 | 0.03078  |
| SPINK1   | 0.0862   | 0.004795 | 1.549674 | 0.096353 |
| GRPEL2   | 0.636248 | 0.201918 | 2.004833 | 0.440019 |
| ARSK     | 0.450067 | 0.073151 | 2.769091 | 0.38911  |
| RHOBTB3  | 0.714551 | 0.514549 | 0.992291 | 0.044839 |

|          |          |          |          |          |
|----------|----------|----------|----------|----------|
| TIGD6    | 2.473373 | 0.319364 | 19.15547 | 0.3859   |
| SERINC5  | 0.081563 | 0.004231 | 1.572366 | 0.096878 |
| CAGE1    | 3.258438 | 0.107717 | 98.56736 | 0.497108 |
| CASP3    | 1.082194 | 0.570572 | 2.052577 | 0.808885 |
| ERAP1    | 0.22783  | 0.022243 | 2.333627 | 0.212737 |
| ERAP2    | 0.884834 | 0.681261 | 1.149238 | 0.359026 |
| CMYA5    | 0.040274 | 0.0024   | 0.675907 | 0.025604 |
| RICTOR   | 0.245785 | 0.035828 | 1.686107 | 0.153219 |
| EBF1     | 1.116917 | 0.366382 | 3.40493  | 0.845842 |
| ANKRA2   | 0.465862 | 0.189465 | 1.145472 | 0.096095 |
| UBLCP1   | 1.023796 | 0.565322 | 1.854091 | 0.938134 |
| UTP15    | 0.12834  | 0.029068 | 0.566648 | 0.006736 |
| TLR3     | 0.585152 | 0.042566 | 8.04402  | 0.688598 |
| NSA2     | 0.432982 | 0.170614 | 1.09882  | 0.078131 |
| GFM2     | 0.232569 | 0.055419 | 0.975982 | 0.046241 |
| TERT     | 0.079572 | 0.002882 | 2.197087 | 0.134906 |
| CCDC127  | 2.580365 | 1.045732 | 6.3671   | 0.039686 |
| ACSL6    | 1.240287 | 0.250539 | 6.140007 | 0.791876 |
| IL3      | 1.821103 | 0.191019 | 17.36169 | 0.602329 |
| CSF2     | 2.23654  | 0.174968 | 28.58879 | 0.535821 |
| SHROOM1  | 0.00501  | 0.000129 | 0.194198 | 0.004536 |
| GDF9     | 0.610233 | 0.029757 | 12.51423 | 0.748616 |
| UQCRQ    | 1.153944 | 0.413072 | 3.223616 | 0.784718 |
| LEAP2    | 0.708902 | 0.156033 | 3.220732 | 0.655971 |
| GJB7     | 2.432031 | 0.222337 | 26.60275 | 0.46654  |
| SLC35A1  | 1.4783   | 0.83797  | 2.607934 | 0.177136 |
| TXLNB    | 0.355169 | 0.037206 | 3.390492 | 0.368508 |
| CITED2   | 1.18947  | 0.778098 | 1.81833  | 0.422973 |
| DCBLD1   | 0.851839 | 0.189663 | 3.825894 | 0.834269 |
| SFXN1    | 0.719734 | 0.301743 | 1.716751 | 0.458398 |
| SAMD3    | 0.89817  | 0.420407 | 1.918879 | 0.781566 |
| PDSS2    | 0.428761 | 0.212794 | 0.863917 | 0.017827 |
| STXBP5   | 0.501891 | 0.314102 | 0.801954 | 0.00394  |
| IL31RA   | 0.416263 | 0.050196 | 3.451936 | 0.416763 |
| ANKRD55  | 1.101837 | 0.379793 | 3.196599 | 0.858364 |
| PI16     | 1.356227 | 0.280454 | 6.558486 | 0.704739 |
| DAGLB    | 0.987586 | 0.546881 | 1.783432 | 0.966957 |
| KIAA0895 | 1.266631 | 0.27224  | 5.893155 | 0.76317  |
| STK17A   | 1.486085 | 0.115715 | 19.0852  | 0.761012 |
| TRA2A    | 0.512738 | 0.260646 | 1.008648 | 0.052988 |
| GALNT10  | 0.713808 | 0.114905 | 4.434265 | 0.717519 |
| SAP30L   | 0.913269 | 0.418045 | 1.995148 | 0.819996 |
| RPS14    | 0.892576 | 0.189843 | 4.196594 | 0.885584 |
| MYOZ3    | 0.687086 | 0.389083 | 1.213333 | 0.195841 |
| COG5     | 0.80099  | 0.169395 | 3.787518 | 0.779519 |
| GPR85    | 0.663845 | 0.035549 | 12.39652 | 0.783828 |
| SLU7     | 0.817641 | 0.343101 | 1.948514 | 0.649538 |
| RP9      | 0.574659 | 0.287467 | 1.148769 | 0.116992 |
| PTTG1    | 0.773802 | 0.476274 | 1.257196 | 0.300378 |
| CAMLG    | 0.568813 | 0.276465 | 1.170302 | 0.12534  |
| RELL2    | 2.273541 | 1.252782 | 4.126007 | 0.006911 |
| KCNK5    | 1.599768 | 1.082123 | 2.365033 | 0.01849  |
| ZNF12    | 0.517239 | 0.200943 | 1.331405 | 0.171748 |
| SLC29A4  | 1.085183 | 0.512661 | 2.297079 | 0.830808 |
| CDCA7L   | 0.587471 | 0.306922 | 1.124463 | 0.108311 |
| SP8      | 0.409878 | 0.007667 | 21.91325 | 0.660423 |
| MIOS     | 0.647707 | 0.209933 | 1.998374 | 0.449917 |
| USP49    | 0.993831 | 0.537614 | 1.837193 | 0.984252 |

|          |          |          |          |          |
|----------|----------|----------|----------|----------|
| SYTL3    | 1.197734 | 0.66679  | 2.151454 | 0.545992 |
| ZNF704   | 0.020146 | 0.000956 | 0.424424 | 0.012035 |
| FABP5    | 0.48002  | 0.257404 | 0.895165 | 0.020984 |
| TAGAP    | 1.089264 | 0.701971 | 1.690234 | 0.702895 |
| COL1A2   | 0.480802 | 0.080266 | 2.880051 | 0.422677 |
| SLC13A4  | 6.429557 | 0.649852 | 63.61324 | 0.111524 |
| BRI3     | 1.450147 | 1.006972 | 2.088366 | 0.045792 |
| LMTK2    | 1.896539 | 0.757254 | 4.749871 | 0.171826 |
| CTSB     | 1.770872 | 1.17075  | 2.678616 | 0.006798 |
| DLC1     | 0.033502 | 0.003763 | 0.298261 | 0.002331 |
| ADCY1    | 2.050178 | 0.204072 | 20.59685 | 0.541945 |
| RAD21    | 0.974561 | 0.446473 | 2.127272 | 0.948414 |
| MED30    | 0.352686 | 0.156085 | 0.79692  | 0.012219 |
| PHKG1    | 0.123196 | 0.003058 | 4.962596 | 0.266805 |
| DEFA4    | 0.993415 | 0.861247 | 1.145867 | 0.927736 |
| OSGIN2   | 0.637777 | 0.36436  | 1.116369 | 0.115353 |
| DEFB1    | 1.012218 | 0.899373 | 1.139221 | 0.840415 |
| OXR1     | 0.781648 | 0.43116  | 1.417047 | 0.417025 |
| GPR146   | 2.520002 | 1.320152 | 4.810361 | 0.005079 |
| UNCX     | 1.570272 | 0.165816 | 14.87042 | 0.694018 |
| TMEM184  | 0.319844 | 0.03201  | 3.195907 | 0.331729 |
| NOS3     | 2.027224 | 0.560873 | 7.327215 | 0.281072 |
| MICALL2  | 0.23302  | 0.058934 | 0.921345 | 0.037824 |
| CA3      | 1.122587 | 0.296397 | 4.251733 | 0.86486  |
| INTS1    | 0.754872 | 0.374442 | 1.521818 | 0.4318   |
| CDK5     | 1.803543 | 0.774029 | 4.202383 | 0.171792 |
| SLC4A2   | 2.476979 | 1.37668  | 4.456684 | 0.002473 |
| FASTK    | 1.445106 | 0.553371 | 3.773833 | 0.452193 |
| TMUB1    | 1.377658 | 0.754101 | 2.516824 | 0.297396 |
| PHAX     | 0.63954  | 0.171367 | 2.386761 | 0.505881 |
| ALDH7A1  | 1.204166 | 0.737752 | 1.965451 | 0.457339 |
| FOXK1    | 3.923917 | 1.355694 | 11.35738 | 0.011696 |
| COX6C    | 0.690218 | 0.255234 | 1.866524 | 0.465126 |
| OSR2     | 0.078964 | 0.001066 | 5.851211 | 0.247792 |
| YWHAZ    | 0.703442 | 0.369032 | 1.340887 | 0.285179 |
| BAALC    | 1.116392 | 0.831424 | 1.499032 | 0.46404  |
| FZD6     | 0.952467 | 0.575957 | 1.575105 | 0.849502 |
| CTHRC1   | 0.842696 | 0.370823 | 1.915032 | 0.682804 |
| SLC25A32 | 0.555162 | 0.147059 | 2.09579  | 0.385247 |
| TP53INP1 | 0.695446 | 0.473193 | 1.022088 | 0.064493 |
| INTS8    | 0.987302 | 0.426542 | 2.285276 | 0.976192 |
| FREM1    | 4.797426 | 1.084221 | 21.22749 | 0.038779 |
| GEM      | 1.793946 | 0.151614 | 21.2265  | 0.642946 |
| TMEM67   | 1.966076 | 0.281578 | 13.72784 | 0.495361 |
| SNAPC3   | 0.223825 | 0.048205 | 1.039255 | 0.056029 |
| NUDT2    | 0.83077  | 0.409304 | 1.686227 | 0.607723 |
| TMEM65   | 1.204358 | 0.453487 | 3.198497 | 0.709053 |
| PSIP1    | 0.291977 | 0.089571 | 0.951764 | 0.041155 |
| UBAP1    | 0.992343 | 0.478745 | 2.056931 | 0.983511 |
| SYK      | 1.035214 | 0.619692 | 1.729355 | 0.894836 |
| NIPSNAP3 | 0.097209 | 0.016504 | 0.572572 | 0.009987 |
| ABCA1    | 1.235529 | 0.791321 | 1.929093 | 0.352175 |
| NFIL3    | 0.767585 | 0.564495 | 1.043741 | 0.091617 |
| LETM2    | 9.064628 | 0.654625 | 125.5183 | 0.10018  |
| METTL2B  | 0.392061 | 0.095185 | 1.614876 | 0.194835 |
| FXN      | 0.126632 | 0.006092 | 2.632397 | 0.181949 |
| TMEM71   | 0.962156 | 0.643131 | 1.439433 | 0.851107 |
| MAMDC2   | 1.153092 | 0.973226 | 1.3662   | 0.0997   |

|          |          |          |          |          |
|----------|----------|----------|----------|----------|
| CPA6     | 3.501711 | 1.00173  | 12.24081 | 0.049684 |
| ALDH1A1  | 1.119415 | 0.84861  | 1.476638 | 0.4247   |
| KDM1B    | 1.359073 | 0.497851 | 3.71011  | 0.549324 |
| HGSNAT   | 1.845984 | 0.108704 | 31.34797 | 0.671397 |
| GKAP1    | 0.450978 | 0.17353  | 1.172021 | 0.102212 |
| KIF27    | 0.42796  | 0.041104 | 4.455748 | 0.477705 |
| HNRNPK   | 0.536049 | 0.125849 | 2.283286 | 0.399049 |
| TRPV6    | 3.357183 | 0.073992 | 152.3225 | 0.533795 |
| ANKS6    | 19.94465 | 1.680107 | 236.7641 | 0.01774  |
| FBP1     | 1.197154 | 0.96652  | 1.482822 | 0.099336 |
| ZHX1     | 0.290947 | 0.058061 | 1.457957 | 0.133241 |
| CYBB     | 1.080041 | 0.870818 | 1.339533 | 0.483375 |
| DYNLT3   | 0.918046 | 0.379135 | 2.222977 | 0.849694 |
| MID1IP1  | 1.824642 | 1.084574 | 3.069702 | 0.02346  |
| NCF1C    | 1.101547 | 0.933689 | 1.299582 | 0.251561 |
| KIAA1958 | 0.602783 | 0.252854 | 1.436983 | 0.253442 |
| PCDH19   | 0.308734 | 0.022631 | 4.211729 | 0.378046 |
| PIGA     | 0.357977 | 0.105767 | 1.211599 | 0.098655 |
| OR1K1    | 0.343101 | 0.037969 | 3.100404 | 0.34086  |
| STRBP    | 0.394637 | 0.185049 | 0.841606 | 0.016118 |
| CLDN3    | 1.109719 | 0.099284 | 12.40362 | 0.932635 |
| GAPVD1   | 0.662832 | 0.295123 | 1.488689 | 0.319184 |
| ATP7A    | 1.044028 | 0.40558  | 2.687498 | 0.928833 |
| ZNF367   | 1.407733 | 0.140684 | 14.08627 | 0.77104  |
| HDX      | 1.314665 | 0.159518 | 10.83481 | 0.799321 |
| NDUFB6   | 0.218686 | 0.080841 | 0.591573 | 0.002754 |
| NOL6     | 0.541378 | 0.160654 | 1.824358 | 0.322178 |
| AQP3     | 1.455106 | 0.450197 | 4.703124 | 0.530895 |
| VCP      | 0.33674  | 0.1245   | 0.910793 | 0.032031 |
| PIGO     | 0.677943 | 0.150917 | 3.045418 | 0.612089 |
| STOML2   | 0.395444 | 0.175412 | 0.891476 | 0.02529  |
| BRWD3    | 0.728595 | 0.220901 | 2.403116 | 0.603047 |
| SLITRK5  | 1.701884 | 0.968755 | 2.989827 | 0.064378 |
| MELK     | 0.635777 | 0.313431 | 1.289638 | 0.209448 |
| OTUD1    | 1.336386 | 0.880821 | 2.027571 | 0.172781 |
| ARHGAP11 | 0.857349 | 0.331188 | 2.219425 | 0.751131 |
| HECTD2   | 0.032816 | 0.002986 | 0.360599 | 0.005206 |
| SLC7A3   | 1.053449 | 0.364385 | 3.045552 | 0.923416 |
| FBXO33   | 0.83352  | 0.485746 | 1.430284 | 0.50863  |
| LRRC18   | 3.295732 | 0.431599 | 25.1665  | 0.250207 |
| WRN      | 0.1865   | 0.059733 | 0.582294 | 0.003841 |
| TSHR     | 3.206617 | 0.011346 | 906.2663 | 0.685749 |
| CFL2     | 2.281321 | 0.215291 | 24.17386 | 0.493468 |
| SUGT1    | 0.585327 | 0.220857 | 1.551267 | 0.281471 |
| GTF2A1   | 0.402768 | 0.050008 | 3.243904 | 0.392895 |
| ZCCHC24  | 1.765602 | 0.6686   | 4.662501 | 0.251204 |
| PGM2L1   | 1.241712 | 0.463571 | 3.326022 | 0.666722 |
| SLC16A9  | 1.029783 | 0.754794 | 1.404957 | 0.853105 |
| FOLR2    | 1.67     | 1.067037 | 2.613687 | 0.024841 |
| INPPL1   | 0.738861 | 0.378505 | 1.442292 | 0.375177 |
| PHOX2A   | 2.840303 | 0.242908 | 33.21138 | 0.405373 |
| GJB2     | 3.708989 | 0.926334 | 14.85059 | 0.064047 |
| CRYL1    | 3.716087 | 1.453225 | 9.502526 | 0.006139 |
| REEP3    | 1.667036 | 0.388797 | 7.147719 | 0.491418 |
| PCF11    | 0.772554 | 0.341079 | 1.749857 | 0.536167 |
| RPL10L   | 0.792187 | 0.136484 | 4.598046 | 0.795146 |
| RPL36AL  | 0.888873 | 0.553368 | 1.427792 | 0.626135 |
| ZNF22    | 0.673473 | 0.380284 | 1.192705 | 0.175215 |

|          |          |          |          |          |
|----------|----------|----------|----------|----------|
| KLHDC2   | 0.39698  | 0.188013 | 0.838205 | 0.015401 |
| RPUSD4   | 0.870525 | 0.406537 | 1.86407  | 0.721152 |
| ARF6     | 1.874854 | 0.817847 | 4.297966 | 0.137568 |
| TTC8     | 0.697191 | 0.234107 | 2.076295 | 0.517103 |
| TMEM63C  | 0.189796 | 0.023577 | 1.527881 | 0.118374 |
| AKR1E2   | 1.184978 | 0.174247 | 8.058528 | 0.862237 |
| KBTBD6   | 3.559023 | 0.523442 | 24.19875 | 0.194266 |
| FAAH2    | 0.393026 | 0.034917 | 4.423884 | 0.449607 |
| NUDT5    | 1.03492  | 0.499386 | 2.144754 | 0.926443 |
| DACT1    | 2.710062 | 0.801811 | 9.159808 | 0.108607 |
| PRPF18   | 0.472613 | 0.190854 | 1.170335 | 0.105236 |
| TAF3     | 3.562718 | 0.201307 | 63.05287 | 0.386152 |
| VDAC2    | 1.872465 | 0.542941 | 6.457648 | 0.320688 |
| COMTD1   | 2.093023 | 1.190198 | 3.680688 | 0.010332 |
| SLC18A2  | 1.798589 | 0.569565 | 5.679637 | 0.31705  |
| PDZD8    | 0.602348 | 0.407009 | 0.891438 | 0.011259 |
| ZNF503   | 1.273626 | 0.8423   | 1.925826 | 0.251599 |
| QSOX2    | 0.445719 | 0.218727 | 0.908281 | 0.026092 |
| NSD1     | 0.279131 | 0.044572 | 1.74804  | 0.17279  |
| PRDX3    | 1.104689 | 0.606719 | 2.011373 | 0.744695 |
| ENOX2    | 0.186785 | 0.024437 | 1.427722 | 0.105916 |
| GHITM    | 0.515479 | 0.240407 | 1.105286 | 0.088617 |
| CLEC1B   | 1.004549 | 0.724583 | 1.392689 | 0.978275 |
| SNAPC4   | 0.68733  | 0.320851 | 1.472405 | 0.334744 |
| PMPCA    | 0.549814 | 0.259833 | 1.163425 | 0.117781 |
| TSC1     | 0.233757 | 0.043106 | 1.267626 | 0.091981 |
| GFI1B    | 0.906689 | 0.594479 | 1.382864 | 0.64923  |
| HPRT1    | 0.133559 | 0.043466 | 0.410391 | 0.00044  |
| ZMYND19  | 0.515837 | 0.218385 | 1.218432 | 0.131181 |
| STOX1    | 2.906074 | 0.387901 | 21.77172 | 0.29914  |
| RET      | 2.046985 | 0.224239 | 18.68605 | 0.525484 |
| DDX21    | 0.734814 | 0.470296 | 1.14811  | 0.175944 |
| BMS1     | 0.188121 | 0.060972 | 0.580424 | 0.003657 |
| STK32C   | 2.979332 | 1.011412 | 8.776259 | 0.047642 |
| FUNDC2   | 0.173916 | 0.032063 | 0.94335  | 0.042605 |
| NDRG2    | 1.471179 | 0.876696 | 2.468776 | 0.143819 |
| ZNF219   | 1.267475 | 0.849405 | 1.891317 | 0.245766 |
| CASP7    | 0.550713 | 0.07114  | 4.263239 | 0.567798 |
| METTL3   | 0.672592 | 0.3799   | 1.190787 | 0.173564 |
| SALL2    | 3.031651 | 0.846322 | 10.85983 | 0.088444 |
| PRAP1    | 2.995746 | 0.393479 | 22.80806 | 0.289426 |
| TRUB1    | 0.885992 | 0.129777 | 6.0487   | 0.901704 |
| ZFYVE1   | 67.42923 | 7.024326 | 647.2793 | 0.000263 |
| FRAT1    | 1.382109 | 0.819587 | 2.330717 | 0.224842 |
| UBTD1    | 1.478774 | 0.978437 | 2.234965 | 0.06338  |
| E2F7     | 1.178246 | 0.396841 | 3.498283 | 0.767675 |
| ISCA2    | 1.083122 | 0.465429 | 2.520583 | 0.853007 |
| PACSIN3  | 1.213884 | 0.363955 | 4.048622 | 0.752474 |
| TTC7B    | 5.064991 | 1.273875 | 20.13866 | 0.02124  |
| SLC39A13 | 0.595858 | 0.080643 | 4.402711 | 0.611878 |
| PSMC3    | 0.592804 | 0.25336  | 1.387026 | 0.227961 |
| RAPSN    | 0.969236 | 0.076474 | 12.28421 | 0.980761 |
| AGBL2    | 2.907496 | 0.49085  | 17.22222 | 0.239627 |
| TC2N     | 0.611698 | 0.273841 | 1.366394 | 0.23066  |
| CPSF2    | 1.411157 | 0.596425 | 3.338835 | 0.433149 |
| MOAP1    | 0.719899 | 0.347803 | 1.490082 | 0.375923 |
| IFI27L1  | 0.776258 | 0.399588 | 1.507995 | 0.454742 |
| IFI27    | 1.207524 | 0.968439 | 1.505632 | 0.093917 |

|         |          |          |          |          |
|---------|----------|----------|----------|----------|
| CLMN    | 9.176108 | 1.074657 | 78.35148 | 0.042789 |
| PDZRN4  | 1.18604  | 0.31823  | 4.420361 | 0.799351 |
| CCDC38  | 0.724091 | 0.071944 | 7.287683 | 0.784059 |
| PTER    | 3.057046 | 0.529558 | 17.64779 | 0.211569 |
| C1QL3   | 0.051792 | 0.001036 | 2.588833 | 0.137978 |
| CACNB2  | 1.102592 | 0.009789 | 124.1956 | 0.96768  |
| ARL5B   | 1.032184 | 0.273561 | 3.894565 | 0.962709 |
| TAF1D   | 0.691073 | 0.372738 | 1.28128  | 0.240762 |
| ABTB2   | 0.50148  | 0.19485  | 1.290648 | 0.152438 |
| AMOTL1  | 1.43132  | 0.108412 | 18.89708 | 0.785334 |
| HTRA1   | 3.407432 | 1.528178 | 7.597672 | 0.002731 |
| LIPC    | 1.090652 | 0.23337  | 5.097158 | 0.912169 |
| CEP57   | 0.736994 | 0.403972 | 1.34455  | 0.319814 |
| TCP11L2 | 1.127933 | 0.56533  | 2.250427 | 0.732652 |
| SPRED1  | 2.143896 | 1.424649 | 3.226262 | 0.000255 |
| GPR176  | 0.855899 | 0.101305 | 7.231269 | 0.88636  |
| JAM3    | 1.237363 | 0.923596 | 1.657723 | 0.153488 |
| CMTM5   | 1.252289 | 0.788992 | 1.987633 | 0.339845 |
| ADAMTS1 | 0.412864 | 0.041594 | 4.098057 | 0.449983 |
| GPT2    | 0.855839 | 0.553407 | 1.323545 | 0.484037 |
| AMN     | 3.167683 | 0.174716 | 57.4317  | 0.435449 |
| RAB8B   | 1.418302 | 0.831454 | 2.419351 | 0.199651 |
| IKBIP   | 3.79578  | 1.148557 | 12.5444  | 0.028738 |
| RPUSD2  | 1.296921 | 0.631113 | 2.66514  | 0.479264 |
| HIF1AN  | 0.662139 | 0.248938 | 1.761195 | 0.408804 |
| NDUFB8  | 0.37049  | 0.102661 | 1.337054 | 0.129426 |
| ZFYVE19 | 0.97386  | 0.353867 | 2.680117 | 0.959102 |
| SPINT1  | 1.686654 | 0.771103 | 3.689262 | 0.190518 |
| FBN1    | 0.106433 | 0.012028 | 0.941839 | 0.044028 |
| AVPR1A  | 0.250781 | 0.015714 | 4.002157 | 0.327735 |
| DEPDC4  | 0.111811 | 0.00344  | 3.634501 | 0.217406 |
| LRTM2   | 0.271143 | 0.015454 | 4.757212 | 0.371908 |
| BRD7    | 0.484171 | 0.214328 | 1.09375  | 0.081082 |
| CKB     | 1.365339 | 0.921619 | 2.02269  | 0.120442 |
| TRMT61A | 0.759802 | 0.31921  | 1.808526 | 0.534706 |
| BTRC    | 0.133692 | 0.018672 | 0.95722  | 0.045124 |
| POLL    | 2.509472 | 0.842597 | 7.473859 | 0.098457 |
| BAG5    | 0.21268  | 0.041598 | 1.087377 | 0.062978 |
| API5    | 0.793554 | 0.414405 | 1.519594 | 0.485431 |
| ZNF319  | 1.063522 | 0.506341 | 2.233831 | 0.870795 |
| HPS6    | 1.883867 | 1.038237 | 3.418254 | 0.037215 |
| SENP8   | 2.945283 | 0.377898 | 22.95512 | 0.302501 |
| NOLC1   | 0.266403 | 0.122349 | 0.580067 | 0.000863 |
| ALKBH3  | 0.133328 | 0.051536 | 0.344935 | 3.26E-05 |
| COPS2   | 1.164058 | 0.506271 | 2.676493 | 0.720637 |
| SGPL1   | 4.587996 | 1.699493 | 12.38588 | 0.002642 |
| FRS2    | 0.335429 | 0.020583 | 5.466354 | 0.443019 |
| CCT2    | 0.63697  | 0.387096 | 1.048139 | 0.075907 |
| PCBD1   | 1.537413 | 0.748708 | 3.156954 | 0.241353 |
| ARIH1   | 0.450903 | 0.191121 | 1.063793 | 0.068949 |
| COX11   | 0.747211 | 0.287842 | 1.939687 | 0.549353 |
| ZNF202  | 0.627395 | 0.194796 | 2.020706 | 0.434694 |
| STXBP4  | 1.398686 | 0.120247 | 16.26923 | 0.78869  |
| CYYR1   | 0.71131  | 0.436586 | 1.158906 | 0.171374 |
| CUL5    | 0.703967 | 0.339758 | 1.458597 | 0.344966 |
| C2      | 1.037143 | 0.730467 | 1.472574 | 0.838421 |
| PLEKHF1 | 1.416943 | 0.831523 | 2.41452  | 0.200009 |
| SMPD1   | 1.993663 | 0.744776 | 5.33676  | 0.169624 |



|          |          |          |          |          |
|----------|----------|----------|----------|----------|
| APBB1    | 9.173126 | 0.1922   | 437.8061 | 0.261122 |
| SYNPO2L  | 3.872028 | 0.491524 | 30.50229 | 0.198608 |
| NUDT13   | 1.102848 | 0.122813 | 9.903426 | 0.930343 |
| TRIM44   | 0.71073  | 0.407374 | 1.239983 | 0.229176 |
| ILK      | 5.314964 | 1.443928 | 19.56389 | 0.011988 |
| TAF10    | 1.778338 | 0.813724 | 3.886435 | 0.148965 |
| TPP1     | 1.222572 | 0.739801 | 2.020384 | 0.432993 |
| DCHS1    | 1.971044 | 1.026369 | 3.785204 | 0.041536 |
| CYB5A    | 1.199755 | 0.507408 | 2.836792 | 0.678301 |
| USP54    | 1.939172 | 0.722914 | 5.201708 | 0.188352 |
| RAG1     | 2.290211 | 0.236926 | 22.13802 | 0.474057 |
| WDR88    | 4.940146 | 0.796155 | 30.65363 | 0.08631  |
| ATP9B    | 0.222239 | 0.053103 | 0.930075 | 0.039474 |
| PPFIBP2  | 1.3609   | 0.951183 | 1.947102 | 0.091775 |
| CYB5R2   | 0.079829 | 0.003445 | 1.849931 | 0.114942 |
| SERPINB8 | 0.880632 | 0.544322 | 1.424731 | 0.604556 |
| RIC3     | 1.761981 | 0.112492 | 27.59818 | 0.686568 |
| IDH3A    | 1.476664 | 0.641071 | 3.401392 | 0.359884 |
| CRABP1   | 1.07197  | 0.523659 | 2.194405 | 0.849204 |
| PLD4     | 0.780429 | 0.259584 | 2.346327 | 0.658909 |
| ZMAT1    | 0.598276 | 0.025751 | 13.89993 | 0.748908 |
| XRR1A    | 1.429596 | 0.236101 | 8.656232 | 0.697305 |
| TRIM66   | 0.867864 | 0.360251 | 2.090733 | 0.752064 |
| RNF169   | 1.996238 | 0.344362 | 11.57202 | 0.440722 |
| RPL27A   | 0.54362  | 0.029888 | 9.887628 | 0.68047  |
| CDYL2    | 1.617524 | 0.31831  | 8.219597 | 0.562049 |
| CENPN    | 0.483034 | 0.29858  | 0.781441 | 0.003029 |
| ATMIN    | 1.139303 | 0.435929 | 2.977575 | 0.790185 |
| TMEM41B  | 0.575209 | 0.257498 | 1.284921 | 0.177463 |
| LEO1     | 0.656872 | 0.215377 | 2.003374 | 0.460098 |
| ZNF143   | 0.689151 | 0.250694 | 1.894459 | 0.470552 |
| TMX3     | 0.796771 | 0.446488 | 1.42186  | 0.441985 |
| MFAP4    | 0.918644 | 0.653559 | 1.291249 | 0.625201 |
| WEE1     | 0.376656 | 0.185506 | 0.764773 | 0.00689  |
| MAPK7    | 2.245779 | 1.028931 | 4.901715 | 0.042196 |
| PRKCB    | 1.04375  | 0.577651 | 1.88594  | 0.887189 |
| NDST2    | 1.113665 | 0.406163 | 3.053578 | 0.834299 |
| MCM7     | 0.27433  | 0.130472 | 0.576805 | 0.000647 |
| CCDC68   | 3.619967 | 0.159829 | 81.98844 | 0.419022 |
| CLEC4E   | 3.572701 | 0.742992 | 17.17946 | 0.112016 |
| ZNF3     | 0.629297 | 0.100895 | 3.925032 | 0.619964 |
| CLEC4D   | 1.165006 | 0.634781 | 2.138121 | 0.622027 |
| ZSCAN21  | 0.568026 | 0.190198 | 1.696408 | 0.310969 |
| RIMKLB   | 0.879177 | 0.383262 | 2.016774 | 0.761146 |
| TK2      | 1.673538 | 0.794345 | 3.525834 | 0.175611 |
| TMED3    | 0.463735 | 0.242764 | 0.885842 | 0.019963 |
| SEC11C   | 1.025325 | 0.5356   | 1.962829 | 0.93983  |
| TMEM135  | 1.258877 | 0.379365 | 4.177434 | 0.706781 |
| IQCD     | 0.06199  | 0.002386 | 1.610395 | 0.094277 |
| NDEL1    | 1.271298 | 0.556881 | 2.902229 | 0.568707 |
| CENPV    | 0.49603  | 0.295274 | 0.833278 | 0.008071 |
| RRAD     | 0.527632 | 0.029249 | 9.51816  | 0.664855 |
| HSP90B1  | 0.647112 | 0.386402 | 1.083726 | 0.098058 |
| BLCAP    | 1.789553 | 0.769965 | 4.159283 | 0.176228 |
| CHRFAM7  | 0.842988 | 0.134684 | 5.276252 | 0.855166 |
| ATF7IP2  | 0.734266 | 0.340528 | 1.583264 | 0.430755 |
| TMPRSS5  | 0.047497 | 0.003237 | 0.696858 | 0.026181 |
| COG1     | 0.595918 | 0.185482 | 1.914567 | 0.384692 |

|          |          |          |          |          |
|----------|----------|----------|----------|----------|
| PLEKHA7  | 1.494926 | 0.290244 | 7.69974  | 0.630671 |
| ZNF606   | 1.987576 | 0.446659 | 8.844468 | 0.367144 |
| B2M      | 1.12126  | 0.445143 | 2.82432  | 0.808141 |
| ZNF592   | 1.559765 | 0.15141  | 16.06805 | 0.708725 |
| NNMT     | 1.773474 | 0.964288 | 3.26169  | 0.065331 |
| ACSM1    | 0.706617 | 0.091611 | 5.450308 | 0.739012 |
| AP1G1    | 1.184838 | 0.669043 | 2.098283 | 0.560801 |
| SLFN5    | 5.476732 | 0.77848  | 38.52972 | 0.087564 |
| CATSPER2 | 0.913184 | 0.369664 | 2.255847 | 0.843962 |
| SAAL1    | 0.295741 | 0.122869 | 0.711836 | 0.006559 |
| YPEL4    | 0.962356 | 0.655891 | 1.412015 | 0.844484 |
| PIIB     | 1.207601 | 0.916363 | 1.591401 | 0.180353 |
| LDHC     | 1.448542 | 0.115463 | 18.17273 | 0.774006 |
| LDHAL6A  | 0.390091 | 0.059798 | 2.54474  | 0.325204 |
| FAM111A  | 0.552093 | 0.314433 | 0.969385 | 0.038619 |
| KIF7     | 1.603764 | 0.588642 | 4.369478 | 0.355653 |
| LDHD     | 0.655735 | 0.086838 | 4.951621 | 0.682459 |
| PEX11A   | 1.272023 | 0.477356 | 3.389595 | 0.630404 |
| TMEM170  | 0.929375 | 0.43853  | 1.969623 | 0.848426 |
| MESP1    | 1.238398 | 0.720624 | 2.128194 | 0.438942 |
| ANPEP    | 1.551749 | 1.072957 | 2.244196 | 0.019594 |
| RBPMS2   | 0.783903 | 0.614208 | 1.000482 | 0.050454 |
| NAV2     | 1.031625 | 0.039555 | 26.9055  | 0.985071 |
| ANKDD1A  | 0.569934 | 0.28052  | 1.157937 | 0.120061 |
| DCTN5    | 0.681439 | 0.338776 | 1.370694 | 0.282079 |
| TERF2IP  | 0.884878 | 0.431101 | 1.816303 | 0.738871 |
| PLK1     | 0.607785 | 0.245122 | 1.507013 | 0.28249  |
| CLPX     | 0.416637 | 0.160871 | 1.079039 | 0.071343 |
| GPR182   | 1.087033 | 0.273102 | 4.326739 | 0.905745 |
| ZBTB39   | 1.187247 | 0.322945 | 4.364685 | 0.796104 |
| TAC3     | 0.390025 | 0.050685 | 3.001305 | 0.365814 |
| MYO1A    | 0.260229 | 0.023806 | 2.844605 | 0.26993  |
| NAB2     | 3.967573 | 1.963493 | 8.017158 | 0.000123 |
| VPS39    | 1.606738 | 0.563995 | 4.577362 | 0.374662 |
| STAT6    | 1.585699 | 0.779546 | 3.225521 | 0.20318  |
| PATL1    | 0.980048 | 0.433886 | 2.213704 | 0.961336 |
| STX3     | 0.481442 | 0.273248 | 0.848267 | 0.011426 |
| MRPL16   | 0.623331 | 0.25606  | 1.517385 | 0.297725 |
| PIP4K2C  | 0.723732 | 0.232351 | 2.254297 | 0.577001 |
| MTMR10   | 0.49388  | 0.151082 | 1.61447  | 0.243072 |
| YWHAB    | 0.917443 | 0.392278 | 2.145675 | 0.842442 |
| SCG5     | 0.733948 | 0.124889 | 4.31326  | 0.732111 |
| TSC22D4  | 2.216407 | 1.082415 | 4.538425 | 0.029515 |
| MS4A7    | 1.247287 | 0.972536 | 1.599658 | 0.081754 |
| MS4A14   | 1.333241 | 0.856804 | 2.074607 | 0.202342 |
| DIS3L    | 0.397584 | 0.201729 | 0.783591 | 0.007712 |
| CCNDBP1  | 0.719541 | 0.182433 | 2.837966 | 0.638272 |
| EPB42    | 0.996351 | 0.831138 | 1.194405 | 0.968479 |
| SMAD3    | 1.837436 | 1.008515 | 3.347664 | 0.046848 |
| MAP1A    | 1.368481 | 0.97744  | 1.915964 | 0.06769  |
| RCCD1    | 0.16362  | 0.043273 | 0.618665 | 0.00764  |
| AKTIP    | 1.143768 | 0.552819 | 2.366425 | 0.717264 |
| MAPRE2   | 1.287827 | 0.549306 | 3.01926  | 0.560655 |
| MBD6     | 0.609325 | 0.319844 | 1.160807 | 0.131937 |
| CNPY4    | 0.26829  | 0.044158 | 1.630044 | 0.152947 |
| PDIA3    | 0.096661 | 0.006415 | 1.456465 | 0.091358 |
| NUDT21   | 0.821084 | 0.396184 | 1.701679 | 0.595986 |
| NKX3-1   | 1.246233 | 0.725319 | 2.141262 | 0.425402 |

|         |          |          |          |          |
|---------|----------|----------|----------|----------|
| DUSP18  | 1.782707 | 0.967768 | 3.283892 | 0.063618 |
| TEF     | 1.462074 | 0.486409 | 4.394776 | 0.498738 |
| MEI1    | 2.743774 | 0.379069 | 19.85995 | 0.317582 |
| PBX3    | 1.067103 | 0.860702 | 1.323    | 0.553721 |
| NGGT2   | 1.76496  | 0.713196 | 4.367781 | 0.219121 |
| PHB     | 0.759171 | 0.38114  | 1.512147 | 0.433207 |
| SNRPD1  | 0.195415 | 0.073957 | 0.51634  | 0.00099  |
| TTC16   | 0.310809 | 0.062241 | 1.552073 | 0.154386 |
| SAMD14  | 0.907836 | 0.495281 | 1.664038 | 0.754465 |
| PIP5KL1 | 1.432849 | 0.288545 | 7.11521  | 0.660028 |
| TMEM92  | 0.568806 | 0.029692 | 10.89638 | 0.708013 |
| FAM102A | 1.129902 | 0.519789 | 2.456147 | 0.757866 |
| ACSF2   | 2.22093  | 1.184294 | 4.164955 | 0.012875 |
| GOLGA2  | 0.429341 | 0.138846 | 1.327619 | 0.142118 |
| TRUB2   | 0.983521 | 0.461596 | 2.095581 | 0.965658 |
| COQ4    | 0.39519  | 0.106174 | 1.470942 | 0.166212 |
| SLC27A4 | 0.743092 | 0.118706 | 4.651706 | 0.751015 |
| URM1    | 1.297218 | 0.46542  | 3.615606 | 0.618789 |
| CERCAM  | 0.759225 | 0.406121 | 1.419334 | 0.388177 |
| DOLPP1  | 0.599592 | 0.268604 | 1.338439 | 0.211859 |
| ENDOG   | 1.241922 | 0.756612 | 2.038523 | 0.391504 |
| SP2     | 1.731482 | 0.923719 | 3.245608 | 0.086814 |
| PRR15L  | 0.272624 | 0.047219 | 1.574034 | 0.146265 |
| COQ7    | 0.222529 | 0.063623 | 0.778318 | 0.018659 |
| GPRC5B  | 2.49296  | 0.28538  | 21.77747 | 0.40878  |
| CRK     | 1.77063  | 0.599338 | 5.230994 | 0.301265 |
| FBXO22  | 0.106762 | 0.014698 | 0.77546  | 0.027013 |
| TBC1D2B | 2.061334 | 1.164549 | 3.648707 | 0.013034 |
| NOD2    | 1.329303 | 1.026298 | 1.721769 | 0.031035 |
| SNX20   | 1.102048 | 0.282471 | 4.299593 | 0.888741 |
| LOXHD1  | 0.905415 | 0.195069 | 4.202489 | 0.899046 |
| KATNAL2 | 0.150881 | 0.013024 | 1.747901 | 0.130234 |
| HDHD2   | 0.384492 | 0.208064 | 0.710521 | 0.002283 |
| ZNF91   | 0.864977 | 0.542218 | 1.37986  | 0.542703 |
| RNF214  | 0.411217 | 0.115896 | 1.459061 | 0.169045 |
| DPEP2   | 1.248985 | 0.716525 | 2.177126 | 0.43292  |
| POP5    | 0.32465  | 0.11644  | 0.905164 | 0.031522 |
| CD3D    | 0.815651 | 0.562726 | 1.182257 | 0.281958 |
| TBC1D16 | 1.473751 | 0.88685  | 2.449051 | 0.134504 |
| ACAA2   | 0.414958 | 0.212416 | 0.810628 | 0.01004  |
| STIM1   | 1.155443 | 0.622697 | 2.143977 | 0.646886 |
| RRM1    | 0.464863 | 0.278961 | 0.77465  | 0.003282 |
| TRIM68  | 0.502474 | 0.236579 | 1.067216 | 0.073342 |
| FN3K    | 0.200863 | 0.021089 | 1.913078 | 0.162763 |
| IRGQ    | 0.669956 | 0.045894 | 9.779999 | 0.76965  |
| ZNF226  | 0.313454 | 0.09429  | 1.042038 | 0.058387 |
| ZNF180  | 3.070734 | 0.268896 | 35.06717 | 0.36657  |
| PPP2R3B | 1.048831 | 0.381617 | 2.882595 | 0.926359 |
| ZNF668  | 0.791818 | 0.377223 | 1.662083 | 0.537235 |
| ZNF646  | 2.682966 | 1.230641 | 5.849234 | 0.01307  |
| VKORC1  | 1.28892  | 0.554759 | 2.994656 | 0.555141 |
| GNG8    | 1.076341 | 0.31009  | 3.73605  | 0.907759 |
| LPO     | 5.420244 | 0.435575 | 67.44889 | 0.188884 |
| CA4     | 0.995149 | 0.70237  | 1.409971 | 0.978178 |
| TPM4    | 1.394014 | 0.775181 | 2.506864 | 0.267237 |
| RAB8A   | 1.108744 | 0.423229 | 2.904606 | 0.833604 |
| GPX4    | 2.030284 | 0.990492 | 4.16162  | 0.053128 |
| MIDN    | 1.190646 | 0.658602 | 2.152496 | 0.563546 |

|          |          |          |          |          |
|----------|----------|----------|----------|----------|
| JSRP1    | 0.889238 | 0.580166 | 1.362961 | 0.590046 |
| KLHL26   | 5.090481 | 1.623081 | 15.96531 | 0.005264 |
| GATAD2A  | 1.467916 | 0.600691 | 3.587162 | 0.399802 |
| MVD      | 2.457794 | 1.09221  | 5.530758 | 0.029772 |
| CDT1     | 0.656552 | 0.434119 | 0.992955 | 0.046211 |
| TRAPPC2L | 0.932936 | 0.443173 | 1.963948 | 0.854969 |
| ANKRD11  | 0.580337 | 0.165502 | 2.034963 | 0.395291 |
| PROCA1   | 0.932958 | 0.197325 | 4.41105  | 0.930233 |
| RPL13    | 1.159876 | 0.560733 | 2.399202 | 0.689199 |
| ZNF641   | 1.405669 | 0.7684   | 2.571457 | 0.269145 |
| CACNB3   | 1.328905 | 0.956012 | 1.847246 | 0.090599 |
| DHRS13   | 0.857533 | 0.508701 | 1.445571 | 0.564033 |
| TP53I13  | 0.928692 | 0.528373 | 1.632309 | 0.797106 |
| CORO6    | 1.749459 | 0.842592 | 3.632371 | 0.133489 |
| RHEBL1   | 0.325345 | 0.063382 | 1.670028 | 0.178476 |
| TUBA1A   | 0.773621 | 0.314081 | 1.905527 | 0.576791 |
| TUBA1C   | 0.49644  | 0.194336 | 1.268177 | 0.143339 |
| ZNF610   | 2.886284 | 0.545815 | 15.26274 | 0.212245 |
| ZNF528   | 0.0743   | 0.00156  | 3.538464 | 0.187215 |
| ZNF701   | 1.332737 | 0.421366 | 4.215307 | 0.624908 |
| SERTAD3  | 1.000418 | 0.238839 | 4.190415 | 0.999544 |
| RAB4B    | 2.055506 | 1.009154 | 4.18678  | 0.047137 |
| GPD1     | 2.507571 | 0.125125 | 50.25314 | 0.547802 |
| CYP2S1   | 2.330567 | 1.534753 | 3.539031 | 7.19E-05 |
| AXL      | 1.729297 | 0.238683 | 12.52906 | 0.587763 |
| NFKBID   | 2.017831 | 0.732263 | 5.560358 | 0.174646 |
| TMC4     | 1.04945  | 0.33195  | 3.317802 | 0.934499 |
| LAIR1    | 1.792102 | 0.568869 | 5.645634 | 0.319031 |
| TTYH1    | 1.630181 | 0.747955 | 3.553009 | 0.218929 |
| LENG8    | 1.459612 | 0.556014 | 3.83168  | 0.4425   |
| CDC42EP5 | 0.822716 | 0.199886 | 3.38623  | 0.786908 |
| LAIR2    | 1.283276 | 0.807643 | 2.039017 | 0.291102 |
| ZNF526   | 1.106362 | 0.48479  | 2.52488  | 0.810256 |
| TRAPPC9  | 1.57741  | 0.923342 | 2.694799 | 0.095301 |
| KIR3DL1  | 0.927587 | 0.394855 | 2.179075 | 0.863044 |
| ZNF146   | 0.927705 | 0.3138   | 2.742632 | 0.89207  |
| ZNF283   | 1.772364 | 0.241031 | 13.03264 | 0.573964 |
| PPP1R14A | 1.901918 | 1.22369  | 2.956054 | 0.004274 |
| SPINT2   | 1.286391 | 0.998877 | 1.656664 | 0.051027 |
| YIF1B    | 2.123097 | 1.017334 | 4.430738 | 0.044883 |
| PSCA     | 0.354269 | 0.03684  | 3.406749 | 0.368887 |
| ATCAY    | 0.387977 | 0.023023 | 6.538172 | 0.511172 |
| DAPK3    | 1.912894 | 0.930244 | 3.933554 | 0.077836 |
| EEF2     | 0.964034 | 0.426325 | 2.179936 | 0.929887 |
| TMIGD2   | 0.657051 | 0.36266  | 1.190416 | 0.166015 |
| CHAF1A   | 0.515885 | 0.235099 | 1.132022 | 0.0988   |
| UBXN6    | 1.345355 | 0.839737 | 2.155416 | 0.217342 |
| SEMA6B   | 1.721257 | 0.346126 | 8.559681 | 0.506967 |
| ZNF444   | 1.934522 | 0.956337 | 3.913241 | 0.066393 |
| NXN      | 1.088092 | 0.310408 | 3.814156 | 0.895045 |
| GLOD4    | 0.231454 | 0.075834 | 0.706422 | 0.010157 |
| MFSD3    | 0.763006 | 0.440576 | 1.321405 | 0.334376 |
| GPT      | 0.125855 | 0.023684 | 0.668793 | 0.015016 |
| KIFC2    | 1.000093 | 0.549452 | 1.820333 | 0.999757 |
| SLC43A2  | 1.625341 | 1.166754 | 2.264174 | 0.004081 |
| RILP     | 1.639967 | 0.600761 | 4.476811 | 0.334315 |
| SERPINF2 | 1.284935 | 0.667838 | 2.472244 | 0.452734 |
| WDR81    | 1.380144 | 0.845004 | 2.254188 | 0.198043 |

|          |          |          |          |          |
|----------|----------|----------|----------|----------|
| SRR      | 0.550047 | 0.183038 | 1.652942 | 0.286982 |
| TSR1     | 0.458116 | 0.149927 | 1.399813 | 0.170753 |
| HSD11B1L | 0.663463 | 0.188921 | 2.329983 | 0.522065 |
| CYB5D2   | 0.842654 | 0.286262 | 2.480476 | 0.755961 |
| KLK1     | 0.89374  | 0.180957 | 4.414145 | 0.890351 |
| ZNF83    | 0.800216 | 0.452788 | 1.414228 | 0.443029 |
| KRT80    | 1.229712 | 0.217485 | 6.953086 | 0.815031 |
| KRT1     | 0.915099 | 0.558589 | 1.499146 | 0.724625 |
| OTUB1    | 1.781927 | 0.635666 | 4.995176 | 0.272006 |
| RCOR2    | 1.663875 | 0.841956 | 3.288152 | 0.142925 |
| ANGPTL4  | 0.113179 | 0.010772 | 1.189158 | 0.069432 |
| CD320    | 0.726428 | 0.443209 | 1.190629 | 0.204856 |
| SPRYD3   | 1.155538 | 0.81675  | 1.634855 | 0.414168 |
| IGFBP6   | 1.076279 | 0.681345 | 1.700132 | 0.752664 |
| ZNF558   | 0.697012 | 0.319626 | 1.519982 | 0.364196 |
| NDUFV1   | 1.410993 | 0.676313 | 2.943756 | 0.358824 |
| CDK2AP2  | 1.585749 | 0.928961 | 2.706895 | 0.091051 |
| NUDT8    | 0.678738 | 0.152507 | 3.020755 | 0.610952 |
| TBX10    | 0.275117 | 0.032021 | 2.363728 | 0.239574 |
| PRDX2    | 0.955633 | 0.685714 | 1.3318   | 0.788713 |
| ZNF232   | 1.649552 | 0.46442  | 5.858967 | 0.438955 |
| MIS12    | 1.107072 | 0.586184 | 2.090827 | 0.753866 |
| CD300C   | 1.151252 | 0.88448  | 1.498486 | 0.294984 |
| CD300A   | 1.281601 | 0.867753 | 1.892821 | 0.21239  |
| TMEM88   | 1.731565 | 0.77251  | 3.881267 | 0.182467 |
| EVPL     | 1.414342 | 0.86056  | 2.32449  | 0.171452 |
| SRP68    | 0.846101 | 0.28043  | 2.552817 | 0.76677  |
| MGAT5B   | 0.088925 | 0.005724 | 1.381591 | 0.083806 |
| TMC8     | 1.075729 | 0.552866 | 2.093081 | 0.829812 |
| TK1      | 0.869895 | 0.583372 | 1.297142 | 0.494139 |
| TMEM68   | 0.231699 | 0.028164 | 1.906163 | 0.173828 |
| TMEM99   | 0.903558 | 0.250425 | 3.260121 | 0.876897 |
| GHDC     | 1.047816 | 0.582894 | 1.883564 | 0.875956 |
| ZNF598   | 2.085417 | 0.783913 | 5.547758 | 0.140946 |
| RAB26    | 0.535799 | 0.060268 | 4.76343  | 0.575657 |
| MLST8    | 1.121999 | 0.482764 | 2.607654 | 0.789064 |
| E4F1     | 0.615678 | 0.278982 | 1.358722 | 0.22977  |
| DNASE1L2 | 0.166743 | 0.027743 | 1.002168 | 0.050277 |
| CASKIN1  | 0.136237 | 0.017123 | 1.083956 | 0.059595 |
| ABCA3    | 1.153062 | 0.486759 | 2.731437 | 0.746183 |
| KCTD5    | 2.338202 | 0.969382 | 5.639871 | 0.058659 |
| SRRM2    | 1.023357 | 0.410237 | 2.552821 | 0.960517 |
| ZNF597   | 0.441557 | 0.174309 | 1.118548 | 0.084757 |
| NLRC3    | 0.29801  | 0.112766 | 0.787564 | 0.014622 |
| SDHAF2   | 0.41918  | 0.141517 | 1.241636 | 0.116574 |
| DDB1     | 0.155747 | 0.050737 | 0.478095 | 0.001156 |
| VPS37C   | 1.864565 | 1.159319 | 2.998832 | 0.010179 |
| VWCE     | 1.116149 | 0.711714 | 1.750407 | 0.632196 |
| RAB3IL1  | 0.99032  | 0.752868 | 1.302662 | 0.944554 |
| BEST1    | 1.311069 | 0.706481 | 2.43305  | 0.39059  |
| FTH1     | 1.168609 | 0.851036 | 1.604688 | 0.335534 |
| BSCL2    | 0.809326 | 0.396756 | 1.650909 | 0.56081  |
| POLR2G   | 0.240599 | 0.097314 | 0.594857 | 0.002038 |
| SLC3A2   | 1.107405 | 0.610466 | 2.008867 | 0.737062 |
| ATG16L2  | 0.851897 | 0.521411 | 1.391855 | 0.522214 |
| C2CD3    | 0.058855 | 0.010063 | 0.344233 | 0.00167  |
| TTC21A   | 0.784288 | 0.228418 | 2.69291  | 0.699461 |
| RPSA     | 0.994033 | 0.442851 | 2.231228 | 0.988425 |

|          |          |          |          |          |
|----------|----------|----------|----------|----------|
| CTNNB1   | 0.175656 | 0.031981 | 0.964784 | 0.045369 |
| ULK4     | 0.205994 | 0.026316 | 1.612486 | 0.132356 |
| FADD     | 2.083192 | 1.092388 | 3.972664 | 0.025863 |
| LTBP3    | 3.40915  | 0.738936 | 15.72844 | 0.115917 |
| NAALADL  | 1.260744 | 0.918943 | 1.72968  | 0.150988 |
| SAC3D1   | 1.180839 | 0.740659 | 1.882621 | 0.484882 |
| BATF2    | 2.92758  | 0.821938 | 10.42747 | 0.097438 |
| SF1      | 0.82901  | 0.387316 | 1.774409 | 0.629114 |
| MAP4K2   | 1.057428 | 0.528153 | 2.117101 | 0.874732 |
| CCDC88B  | 1.249605 | 0.712773 | 2.190756 | 0.436623 |
| SCARA3   | 0.675415 | 0.257662 | 1.77048  | 0.424793 |
| PBK      | 0.702775 | 0.337732 | 1.462379 | 0.345471 |
| PNOC     | 1.136373 | 0.484434 | 2.665677 | 0.768851 |
| COPS6    | 0.865376 | 0.281527 | 2.660054 | 0.800757 |
| PAFAH1B2 | 1.504949 | 0.176382 | 12.84071 | 0.708631 |
| ANKS3    | 2.268812 | 0.580192 | 8.872079 | 0.238992 |
| NUDT16L1 | 1.508737 | 0.754661 | 3.016307 | 0.244595 |
| KIAA1586 | 1.373235 | 0.599461 | 3.145783 | 0.453277 |
| RAB4A    | 1.729183 | 0.699741 | 4.273114 | 0.235446 |
| OR2B2    | 0.315779 | 0.054032 | 1.845493 | 0.200647 |
| SETD5    | 1.348036 | 0.324639 | 5.597612 | 0.680967 |
| VASN     | 1.069633 | 0.482197 | 2.372714 | 0.868471 |
| THAP9    | 0.295962 | 0.056114 | 1.560999 | 0.151268 |
| RNF187   | 2.561438 | 0.808823 | 8.111744 | 0.109774 |
| HOOK3    | 1.405278 | 0.485845 | 4.064687 | 0.530097 |
| MAPK1IP1 | 1.247202 | 0.126869 | 12.26079 | 0.849749 |
| DDIT4    | 1.350912 | 1.040843 | 1.753352 | 0.023768 |
| RBPJ     | 0.432794 | 0.113975 | 1.643427 | 0.218614 |
| LMBRD1   | 1.88013  | 0.975845 | 3.622386 | 0.059175 |
| ZCCHC4   | 1.052338 | 0.11615  | 9.534377 | 0.963814 |
| PTGDR    | 1.015899 | 0.248478 | 4.153484 | 0.982484 |
| TTC39C   | 1.240616 | 0.664484 | 2.316276 | 0.49851  |
| GLYCTK   | 1.788845 | 0.626613 | 5.106765 | 0.277206 |
| GNG4     | 1.690507 | 0.862984 | 3.311547 | 0.125912 |
| UBTD2    | 4.895553 | 0.580605 | 41.27843 | 0.144248 |
| POLR2J3  | 1.368736 | 0.435603 | 4.300796 | 0.591032 |
| NKIRAS2  | 0.542535 | 0.078393 | 3.754717 | 0.535556 |
| DNAJC7   | 1.035067 | 0.410116 | 2.612342 | 0.941832 |
| KCNV2    | 3.000802 | 0.336153 | 26.78786 | 0.325178 |
| IRF2BP2  | 0.884875 | 0.500938 | 1.563072 | 0.673513 |
| NT5DC2   | 1.156067 | 0.740382 | 1.805135 | 0.523561 |
| FOXI1    | 0.670793 | 0.005628 | 79.95762 | 0.869969 |
| BMI1     | 0.910983 | 0.598244 | 1.38721  | 0.663906 |
| THAP11   | 1.042186 | 0.360682 | 3.011383 | 0.939161 |
| MMADHC   | 0.451966 | 0.234695 | 0.870378 | 0.017541 |
| PDHB     | 0.469836 | 0.180014 | 1.226269 | 0.122773 |
| PXK      | 0.506128 | 0.196221 | 1.305492 | 0.158968 |
| PCMTD1   | 0.776067 | 0.428056 | 1.407012 | 0.403651 |
| KCTD6    | 1.317776 | 0.487517 | 3.561997 | 0.586508 |
| ACOX2    | 1.149566 | 0.73673  | 1.79374  | 0.539202 |
| IRF2     | 3.867311 | 1.328276 | 11.25978 | 0.013116 |
| CX3CR1   | 1.143708 | 0.9428   | 1.38743  | 0.173085 |
| XIRP1    | 2.179312 | 0.10889  | 43.61662 | 0.610367 |
| DEGS2    | 2.354569 | 0.677313 | 8.185277 | 0.177955 |
| ARF4     | 0.591641 | 0.22551  | 1.552209 | 0.286188 |
| FILIP1L  | 2.943902 | 0.534144 | 16.22513 | 0.215023 |
| DTYMK    | 0.739437 | 0.150718 | 3.62775  | 0.709898 |
| TAP1     | 1.116232 | 0.743425 | 1.675991 | 0.595944 |

|          |          |          |          |          |
|----------|----------|----------|----------|----------|
| ING5     | 0.66091  | 0.082154 | 5.316866 | 0.697056 |
| ATG4B    | 0.737933 | 0.18682  | 2.914814 | 0.66458  |
| MLKL     | 1.516894 | 0.624549 | 3.684207 | 0.357426 |
| RFWD3    | 0.486387 | 0.223993 | 1.056158 | 0.068477 |
| RHOH     | 0.822843 | 0.461319 | 1.467686 | 0.508981 |
| KLHL30   | 1.195225 | 0.206798 | 6.908    | 0.842078 |
| COG7     | 1.229302 | 0.310306 | 4.869987 | 0.768816 |
| CDC40    | 0.691002 | 0.309895 | 1.540795 | 0.366327 |
| STIP1    | 1.227406 | 0.543876 | 2.769978 | 0.621724 |
| HR       | 0.742174 | 0.018503 | 29.7699  | 0.874217 |
| RAB31    | 1.150364 | 0.933091 | 1.418229 | 0.189672 |
| REEP4    | 2.765604 | 1.128878 | 6.775372 | 0.026073 |
| TNXB     | 13.26232 | 0.259219 | 678.5341 | 0.197916 |
| BMP1     | 17.25691 | 2.109748 | 141.1548 | 0.007903 |
| ATXN2L   | 0.183914 | 0.027599 | 1.22558  | 0.080159 |
| POLR3D   | 0.641634 | 0.276072 | 1.491259 | 0.302426 |
| FEN1     | 0.519063 | 0.276922 | 0.972933 | 0.040799 |
| HEXIM2   | 1.114698 | 0.462375 | 2.687321 | 0.808896 |
| FNTA     | 0.594085 | 0.126074 | 2.799434 | 0.510281 |
| SERINC2  | 1.292297 | 0.736617 | 2.267163 | 0.371273 |
| COL3A1   | 2.070859 | 0.492078 | 8.714984 | 0.320791 |
| ING2     | 0.512415 | 0.214109 | 1.226333 | 0.13317  |
| CDKN2AIP | 0.878277 | 0.487031 | 1.583822 | 0.66615  |
| SNRNP48  | 0.256433 | 0.04565  | 1.440475 | 0.122229 |
| SLC20A2  | 0.647616 | 0.229712 | 1.825792 | 0.411329 |
| TMUB2    | 0.572272 | 0.153942 | 2.127397 | 0.40477  |
| STAT3    | 0.87654  | 0.356961 | 2.152394 | 0.773735 |
| ZSWIM1   | 2.686151 | 1.08247  | 6.66569  | 0.033101 |
| ADAM9    | 0.378479 | 0.145394 | 0.985227 | 0.046541 |
| AXIN2    | 1.337107 | 0.616971 | 2.897797 | 0.461626 |
| NDUFS5   | 0.846094 | 0.464853 | 1.540003 | 0.58443  |
| ZNF30    | 0.685424 | 0.253801 | 1.85108  | 0.456172 |
| UGT3A2   | 0.159794 | 0.041979 | 0.60827  | 0.007169 |
| SLC16A4  | 2.721424 | 0.071368 | 103.7736 | 0.589944 |
| IL7R     | 0.973822 | 0.6907   | 1.372997 | 0.8797   |
| TMEM208  | 3.435479 | 1.290863 | 9.143118 | 0.013467 |
| AHCYL1   | 0.571396 | 0.260558 | 1.253056 | 0.162439 |
| DNAJC21  | 0.805151 | 0.069978 | 9.263886 | 0.861956 |
| PKIG     | 0.683386 | 0.184678 | 2.528814 | 0.568503 |
| FAM178B  | 0.743989 | 0.487839 | 1.134637 | 0.169639 |
| SEMA4C   | 1.785897 | 0.714606 | 4.463195 | 0.214631 |
| CNNM3    | 0.558642 | 0.185749 | 1.680119 | 0.300019 |
| GSTM4    | 0.974141 | 0.3569   | 2.658866 | 0.959214 |
| TET2     | 0.715441 | 0.337922 | 1.514713 | 0.381585 |
| TCTN2    | 0.621616 | 0.097126 | 3.978422 | 0.615683 |
| SHOX2    | 0.062533 | 0.002344 | 1.668409 | 0.098034 |
| TSPAN5   | 1.286245 | 0.913374 | 1.811334 | 0.149528 |
| ABHD15   | 1.560399 | 0.865836 | 2.812131 | 0.138716 |
| ZBTB5    | 0.620301 | 0.293111 | 1.312725 | 0.21183  |
| CHTF8    | 1.674478 | 0.197696 | 14.18276 | 0.636284 |
| ADAL     | 1.02232  | 0.212574 | 4.916591 | 0.978022 |
| LCMT2    | 2.103764 | 1.00777  | 4.391697 | 0.047639 |
| SNTB2    | 1.058275 | 0.533649 | 2.098654 | 0.871193 |
| IL12A    | 0.973867 | 0.631794 | 1.501151 | 0.90453  |
| ZNF507   | 0.207757 | 0.043518 | 0.991848 | 0.048812 |
| STX18    | 0.186853 | 0.042945 | 0.812991 | 0.025356 |
| GFM1     | 0.568601 | 0.271691 | 1.189978 | 0.134042 |
| DDX19A   | 0.380253 | 0.12866  | 1.123832 | 0.080323 |

|          |          |          |          |          |
|----------|----------|----------|----------|----------|
| ANKRD49  | 1.257724 | 0.629546 | 2.512717 | 0.516076 |
| SFTPB    | 0.272039 | 0.010949 | 6.759003 | 0.427082 |
| USP39    | 0.19944  | 0.058045 | 0.685263 | 0.010463 |
| TNIP2    | 5.602354 | 1.426303 | 22.0054  | 0.013562 |
| TMEM150  | 1.002732 | 0.467053 | 2.152803 | 0.994415 |
| RNF181   | 1.234071 | 0.561979 | 2.709944 | 0.600249 |
| VAMP5    | 1.706671 | 1.249074 | 2.331906 | 0.000789 |
| LRRC28   | 0.460495 | 0.264172 | 0.802719 | 0.006238 |
| MAT2A    | 0.472367 | 0.298853 | 0.746622 | 0.001323 |
| ENHO     | 2.723751 | 0.819709 | 9.050551 | 0.10195  |
| ZNF608   | 0.646649 | 0.225982 | 1.85039  | 0.41638  |
| INPP5D   | 0.720532 | 0.348186 | 1.491061 | 0.377055 |
| LETM1    | 0.45467  | 0.120731 | 1.712278 | 0.244016 |
| TMEM129  | 2.846044 | 0.911719 | 8.884284 | 0.071729 |
| PPIC     | 1.251191 | 0.487047 | 3.214229 | 0.641555 |
| SPRY3    | 1.407609 | 0.143062 | 13.84972 | 0.769459 |
| CEP120   | 1.001076 | 0.346239 | 2.894396 | 0.998415 |
| STXBP6   | 1.867196 | 0.44528  | 7.829729 | 0.393231 |
| MFF      | 0.611613 | 0.334544 | 1.11815  | 0.110226 |
| LGALS9   | 2.063213 | 1.205852 | 3.530155 | 0.008216 |
| SIGLEC7  | 0.8964   | 0.417477 | 1.924736 | 0.779081 |
| E2F6     | 2.618741 | 0.402016 | 17.05854 | 0.313994 |
| FEM1B    | 0.626828 | 0.342076 | 1.148614 | 0.130643 |
| COMMD8   | 1.073474 | 0.636606 | 1.810143 | 0.790274 |
| UQCRFS1  | 0.492375 | 0.170332 | 1.423302 | 0.1908   |
| MAP2K1   | 1.112778 | 0.669505 | 1.849536 | 0.680176 |
| HNRNPH1  | 0.449365 | 0.280182 | 0.720708 | 0.000904 |
| IRS1     | 0.908554 | 0.093058 | 8.870518 | 0.934258 |
| MECP2    | 3.321123 | 1.087394 | 10.14339 | 0.035114 |
| UPF3A    | 0.398012 | 0.183543 | 0.863088 | 0.019659 |
| ROR2     | 0.501346 | 0.030098 | 8.351117 | 0.630443 |
| BRD7P3   | 0.24075  | 0.013961 | 4.151599 | 0.327009 |
| AR       | 2.968645 | 0.721901 | 12.20785 | 0.131487 |
| DHRX     | 1.359148 | 0.346873 | 5.325525 | 0.659649 |
| HSPBAP1  | 0.542931 | 0.269738 | 1.092815 | 0.087029 |
| ASMTL    | 1.103233 | 0.60732  | 2.004087 | 0.747021 |
| SLC25A6  | 1.860458 | 0.864195 | 4.005236 | 0.112539 |
| CHST14   | 0.916304 | 0.488074 | 1.720259 | 0.785639 |
| PARM1    | 0.611546 | 0.213216 | 1.754036 | 0.360331 |
| CSNK1G1  | 0.0755   | 0.009068 | 0.62857  | 0.016878 |
| FAM110B  | 0.82505  | 0.533037 | 1.277035 | 0.388238 |
| AFAP1L2  | 1.042125 | 0.360439 | 3.013058 | 0.939282 |
| ZNF354A  | 1.527901 | 0.357011 | 6.538957 | 0.567696 |
| ATF5     | 1.29297  | 0.722905 | 2.312576 | 0.386407 |
| UBE2V2   | 0.768542 | 0.233136 | 2.533536 | 0.665341 |
| ZBTB43   | 0.92954  | 0.531332 | 1.626188 | 0.797919 |
| XPO6     | 0.707511 | 0.284928 | 1.756833 | 0.455898 |
| MN1      | 1.298871 | 0.979873 | 1.721719 | 0.068978 |
| APEX2    | 1.211038 | 0.666421 | 2.200733 | 0.529809 |
| NSMCE1   | 0.673933 | 0.266691 | 1.70304  | 0.404099 |
| CCDC126  | 1.366408 | 0.650114 | 2.871912 | 0.410084 |
| IL13     | 0.319357 | 0.019632 | 5.195086 | 0.422493 |
| CD2BP2   | 1.333796 | 0.514573 | 3.457258 | 0.553374 |
| RGS14    | 2.199584 | 1.237144 | 3.910755 | 0.007258 |
| TBC1D10B | 1.454965 | 0.779672 | 2.715146 | 0.238771 |
| LMAN2    | 2.122565 | 0.758291 | 5.941359 | 0.151827 |
| RAB24    | 1.241336 | 0.659461 | 2.33663  | 0.502926 |
| PRELID1  | 1.588849 | 0.708446 | 3.56335  | 0.261204 |



|          |          |          |          |          |
|----------|----------|----------|----------|----------|
| THBS3    | 0.728945 | 0.355638 | 1.494105 | 0.387912 |
| CA5B     | 1.215874 | 0.815737 | 1.812289 | 0.337132 |
| EFNA1    | 1.788639 | 1.122027 | 2.851296 | 0.01453  |
| CXCL10   | 1.147533 | 0.740157 | 1.779127 | 0.538498 |
| SH3TC2   | 6.175037 | 0.098454 | 387.299  | 0.388608 |
| CXCL11   | 0.043723 | 0.001113 | 1.717594 | 0.094693 |
| ZRSR2    | 0.420323 | 0.150187 | 1.176343 | 0.098808 |
| NMD3     | 0.796466 | 0.46684  | 1.358833 | 0.403743 |
| ADRB2    | 1.478068 | 0.95538  | 2.28672  | 0.079268 |
| B3GALNT1 | 0.516125 | 0.298855 | 0.891354 | 0.017667 |
| GPRIN1   | 0.325629 | 0.032477 | 3.264937 | 0.34011  |
| KCNAB1   | 0.414118 | 0.005469 | 31.35743 | 0.689652 |
| MRPL1    | 1.164058 | 0.673252 | 2.012665 | 0.586598 |
| SHE      | 11.29382 | 1.517221 | 84.0684  | 0.017933 |
| PGM2     | 1.002494 | 0.486492 | 2.065797 | 0.994613 |
| P2RY12   | 2.294431 | 0.760592 | 6.921472 | 0.14043  |
| SLC33A1  | 1.602584 | 0.732784 | 3.50482  | 0.237504 |
| SNUPN    | 1.399261 | 0.611635 | 3.201144 | 0.426244 |
| CRADD    | 1.082891 | 0.511811 | 2.291183 | 0.835023 |
| SIN3A    | 0.68187  | 0.348475 | 1.334233 | 0.263555 |
| ARL13B   | 1.241167 | 0.141842 | 10.86066 | 0.845219 |
| RNASE2   | 1.027659 | 0.822021 | 1.28474  | 0.810713 |
| RNASE3   | 0.992779 | 0.844064 | 1.167695 | 0.930246 |
| PTK2     | 1.521528 | 0.947566 | 2.443151 | 0.082376 |
| PTAFR    | 1.209579 | 0.916966 | 1.595567 | 0.178136 |
| PTPN9    | 3.356242 | 0.428527 | 26.28624 | 0.248903 |
| RNASE6   | 1.122896 | 0.871571 | 1.446693 | 0.369908 |
| SCN9A    | 1.394402 | 0.797087 | 2.439329 | 0.243957 |
| SDC2     | 0.253403 | 0.034436 | 1.864681 | 0.177632 |
| CD52     | 1.341368 | 1.066236 | 1.687495 | 0.012157 |
| MMGT1    | 0.647335 | 0.172088 | 2.435049 | 0.519986 |
| TM2D2    | 1.440753 | 0.669919 | 3.098535 | 0.349975 |
| HTRA4    | 1.192505 | 0.142629 | 9.970419 | 0.870918 |
| PLEKHA2  | 0.219279 | 0.031366 | 1.532967 | 0.126169 |
| CLIC4    | 1.181053 | 0.61022  | 2.285874 | 0.621369 |
| GPR183   | 1.884734 | 1.055479 | 3.365507 | 0.032154 |
| CCDC8    | 1.34202  | 0.244047 | 7.379796 | 0.735173 |
| ZEB2     | 1.46207  | 0.864923 | 2.471491 | 0.156139 |
| PCBP1    | 0.735358 | 0.274367 | 1.970906 | 0.541126 |
| HINT1    | 0.939559 | 0.455822 | 1.936658 | 0.865847 |
| DTWD2    | 0.638583 | 0.186377 | 2.187975 | 0.47534  |
| VPREB1   | 0.852208 | 0.660113 | 1.100204 | 0.219754 |
| CLIC3    | 1.207571 | 0.852989 | 1.709551 | 0.287585 |
| INO80E   | 1.835813 | 0.955543 | 3.527008 | 0.068233 |
| DFFB     | 0.286282 | 0.100923 | 0.81208  | 0.01871  |
| NFU1     | 0.552922 | 0.183388 | 1.667084 | 0.292653 |
| CKAP2L   | 0.650482 | 0.394734 | 1.071928 | 0.091523 |
| APLF     | 0.493883 | 0.01633  | 14.93718 | 0.685068 |
| BOLA2B   | 0.267615 | 0.045287 | 1.581404 | 0.145856 |
| RGPD8    | 0.759431 | 0.298404 | 1.932732 | 0.563675 |
| HIC2     | 0.978539 | 0.501447 | 1.909548 | 0.949288 |
| LUZP1    | 1.164206 | 0.774875 | 1.749154 | 0.464169 |
| BUB1     | 0.62068  | 0.36083  | 1.06766  | 0.084817 |
| SPNS1    | 1.526571 | 0.803739 | 2.899472 | 0.196202 |
| LRRC45   | 1.340047 | 0.426415 | 4.211215 | 0.616357 |
| AGPAT2   | 2.553761 | 1.265139 | 5.154921 | 0.008891 |
| ASPSCR1  | 1.673602 | 0.708791 | 3.951721 | 0.240083 |
| GP9      | 1.048723 | 0.849541 | 1.294605 | 0.658001 |

|          |          |          |          |          |
|----------|----------|----------|----------|----------|
| FASN     | 1.13101  | 0.743063 | 1.721502 | 0.565703 |
| CNBP     | 0.376307 | 0.069109 | 2.04905  | 0.258344 |
| MT1E     | 1.585491 | 1.092821 | 2.300268 | 0.015205 |
| DUS1L    | 1.099545 | 0.517237 | 2.337419 | 0.805197 |
| GPS1     | 2.026533 | 0.626841 | 6.551635 | 0.238076 |
| RFNG     | 1.901223 | 0.68614  | 5.268094 | 0.216613 |
| DCXR     | 1.37317  | 0.687645 | 2.742105 | 0.36881  |
| ZNF32    | 0.715717 | 0.157167 | 3.259282 | 0.665431 |
| LDB2     | 0.432585 | 0.07068  | 2.647554 | 0.36462  |
| RAC3     | 1.35564  | 0.696571 | 2.638296 | 0.370449 |
| NRG4     | 1.059853 | 0.722865 | 1.55394  | 0.765903 |
| LIMS1    | 1.736432 | 0.549757 | 5.4846   | 0.347009 |
| TAPT1    | 0.634612 | 0.29782  | 1.352268 | 0.238749 |
| UGP2     | 0.942453 | 0.472924 | 1.87814  | 0.866217 |
| HNRNPF   | 0.555681 | 0.176116 | 1.75329  | 0.316241 |
| BTD      | 0.348769 | 0.110017 | 1.105645 | 0.073557 |
| CSGALNA1 | 0.669879 | 0.395762 | 1.133858 | 0.13567  |
| PCDH7    | 0.132278 | 0.000509 | 34.37312 | 0.475808 |
| ROBO1    | 1.741991 | 0.023694 | 128.0707 | 0.800168 |
| AVEN     | 0.564995 | 0.310257 | 1.028888 | 0.061923 |
| P2RY1    | 0.269145 | 0.053898 | 1.344006 | 0.10968  |
| CTNND2   | 0.085784 | 0.006645 | 1.107479 | 0.059871 |
| TRIM56   | 1.339496 | 0.584213 | 3.071227 | 0.489941 |
| AHSP     | 0.990507 | 0.845986 | 1.159717 | 0.905642 |
| WNT10B   | 0.436527 | 0.099568 | 1.913822 | 0.271681 |
| REPS2    | 0.332662 | 0.10909  | 1.014426 | 0.053017 |
| SYAP1    | 0.804215 | 0.435735 | 1.4843   | 0.485895 |
| ITGAM    | 1.13658  | 0.9067   | 1.424744 | 0.266812 |
| PYDC1    | 10.89172 | 0.694773 | 170.7459 | 0.089014 |
| TPST1    | 0.97031  | 0.579292 | 1.625263 | 0.908823 |
| TOR1AIP2 | 0.998064 | 0.200482 | 4.968692 | 0.998112 |
| S100G    | 0.108728 | 0.005363 | 2.204264 | 0.148408 |
| TM4SF1   | 1.461206 | 1.215143 | 1.757095 | 5.55E-05 |
| OTUD3    | 1.413934 | 0.254847 | 7.844749 | 0.691954 |
| GUSB     | 0.535803 | 0.290895 | 0.986902 | 0.045256 |
| BRD3     | 1.222523 | 0.585955 | 2.550643 | 0.592334 |
| KLF13    | 1.900895 | 1.032764 | 3.498767 | 0.039062 |
| ZFPM2    | 2.86716  | 0.224483 | 36.62024 | 0.417675 |
| ZNF764   | 3.440045 | 0.94694  | 12.497   | 0.0605   |
| ZNF747   | 1.124381 | 0.347061 | 3.642685 | 0.845025 |
| ZNF768   | 1.658391 | 0.763538 | 3.601999 | 0.20117  |
| TAS1R3   | 5.005245 | 0.5562   | 45.04218 | 0.150816 |
| TMEM42   | 0.799885 | 0.347687 | 1.840208 | 0.599397 |
| MAP3K2   | 0.716341 | 0.195064 | 2.630644 | 0.615221 |
| PUSL1    | 1.622896 | 0.752922 | 3.498093 | 0.216563 |
| SF3B5    | 1.754873 | 0.865268 | 3.559102 | 0.119034 |
| ZNF35    | 1.045923 | 0.475036 | 2.302887 | 0.911222 |
| IFFO2    | 2.106483 | 1.132568 | 3.917883 | 0.018615 |
| NLGN2    | 1.064994 | 0.436139 | 2.600576 | 0.890049 |
| MYO7B    | 0.270702 | 0.062167 | 1.178754 | 0.081707 |
| CHD3     | 2.469751 | 0.322183 | 18.9323  | 0.384284 |
| TMEM154  | 1.105598 | 0.728901 | 1.676974 | 0.636726 |
| MYRIP    | 2.013543 | 0.042784 | 94.76402 | 0.721716 |
| ALCAM    | 0.767947 | 0.453501 | 1.300423 | 0.325862 |
| YWHAG    | 1.351128 | 0.660221 | 2.765056 | 0.41014  |
| UBE2E3   | 1.239164 | 0.295278 | 5.200273 | 0.769497 |
| CNTROB   | 0.498648 | 0.153323 | 1.621739 | 0.247502 |
| TRAPPC1  | 1.270469 | 0.538775 | 2.995855 | 0.584421 |

|         |          |          |          |          |
|---------|----------|----------|----------|----------|
| KCNAB3  | 0.004215 | 0.00036  | 0.049392 | 1.33E-05 |
| FAM153A | 0.148599 | 0.005095 | 4.334154 | 0.267943 |
| GPR37L1 | 0.743702 | 0.059887 | 9.235558 | 0.817794 |
| TMEM192 | 0.229243 | 0.048571 | 1.08198  | 0.062823 |
| ZNF778  | 3.496287 | 0.393974 | 31.02747 | 0.261129 |
| NIPA1   | 0.806452 | 0.478068 | 1.360401 | 0.420066 |
| FOXD4   | 0.070515 | 0.007275 | 0.683501 | 0.022119 |
| GPR25   | 0.454231 | 0.160066 | 1.289001 | 0.138097 |
| UBE2E1  | 0.486312 | 0.227515 | 1.039491 | 0.062881 |
| HNRNPA3 | 0.332849 | 0.133343 | 0.83085  | 0.018423 |
| SIK2    | 0.227277 | 0.035658 | 1.448621 | 0.116931 |
| RNF150  | 3.428436 | 0.729798 | 16.10606 | 0.118544 |
| CCDC144 | 0.043162 | 0.000959 | 1.942062 | 0.105619 |
| CHRN1   | 0.503504 | 0.249197 | 1.017336 | 0.055867 |
| GYPA    | 0.903313 | 0.68021  | 1.19959  | 0.48231  |
| USP38   | 0.945772 | 0.450328 | 1.986296 | 0.882921 |
| SLC16A5 | 1.18976  | 0.454706 | 3.113063 | 0.723299 |
| NANP    | 0.727783 | 0.132421 | 3.999863 | 0.714752 |
| PWWP2A  | 1.169599 | 0.363551 | 3.762776 | 0.792725 |
| USP50   | 0.105528 | 0.003488 | 3.193053 | 0.196142 |
| USP47   | 0.985558 | 0.393915 | 2.465825 | 0.975198 |
| PDCD6IP | 0.764892 | 0.220739 | 2.650453 | 0.672514 |
| ZNF212  | 0.872794 | 0.384125 | 1.983125 | 0.745247 |
| MRAP    | 0.093692 | 0.006407 | 1.3701   | 0.083647 |
| FAM161A | 0.259975 | 0.060697 | 1.113516 | 0.069509 |
| ZNF282  | 1.537177 | 0.827694 | 2.854817 | 0.173441 |
| GLB1    | 0.915656 | 0.319683 | 2.622683 | 0.86964  |
| CRTAP   | 0.392419 | 0.107064 | 1.438326 | 0.158098 |
| CNGB3   | 0.049013 | 0.003568 | 0.673207 | 0.024072 |
| CMTM8   | 1.226165 | 0.865935 | 1.736251 | 0.250609 |
| STX8    | 0.87456  | 0.43254  | 1.768289 | 0.70905  |
| UBB     | 0.865418 | 0.385392 | 1.943342 | 0.726185 |
| NFRKB   | 0.470085 | 0.168228 | 1.313578 | 0.149944 |
| FABP4   | 1.14798  | 0.824072 | 1.599201 | 0.414539 |
| PRDM10  | 0.502165 | 0.145613 | 1.731781 | 0.275471 |
| B3GNT2  | 0.661233 | 0.358306 | 1.220266 | 0.185775 |
| FOS     | 1.448721 | 1.002086 | 2.094425 | 0.048719 |
| TMED10  | 0.97539  | 0.554413 | 1.716025 | 0.93111  |
| SETMAR  | 0.696706 | 0.435147 | 1.115483 | 0.132355 |
| SMAD1   | 11.04628 | 0.956957 | 127.5086 | 0.054266 |
| EMX2    | 0.978729 | 0.360082 | 2.660254 | 0.966384 |
| SP7     | 1.351265 | 0.137637 | 13.26621 | 0.796167 |
| LRRN2   | 2.104372 | 0.749682 | 5.907014 | 0.157697 |
| SLC30A1 | 1.177259 | 0.784072 | 1.767619 | 0.43132  |
| DCLK2   | 1.417514 | 0.124461 | 16.14438 | 0.778628 |
| ZNF804A | 0.699853 | 0.240071 | 2.040207 | 0.513266 |
| GPRC5C  | 3.709398 | 1.508632 | 9.120607 | 0.004293 |
| TMEM182 | 0.239101 | 0.030875 | 1.851627 | 0.170663 |
| KRT8    | 1.936241 | 0.988359 | 3.793184 | 0.054125 |
| ADORA2B | 1.100727 | 0.617038 | 1.963573 | 0.745193 |
| MGMT    | 1.226469 | 0.867631 | 1.733717 | 0.247704 |
| METTL7B | 1.229997 | 0.942781 | 1.604711 | 0.127083 |
| NFXL1   | 0.69786  | 0.308507 | 1.578596 | 0.387715 |
| DENND5B | 0.271999 | 0.099787 | 0.741411 | 0.010935 |
| CD14    | 1.131628 | 0.977745 | 1.309729 | 0.097283 |
| DNAJC18 | 0.864155 | 0.294891 | 2.532332 | 0.790115 |
| RALGAPB | 0.407169 | 0.171986 | 0.963954 | 0.041007 |
| SLC23A1 | 0.410642 | 0.037499 | 4.496845 | 0.466094 |

|          |          |          |          |          |
|----------|----------|----------|----------|----------|
| KRT72    | 0.516267 | 0.213778 | 1.246771 | 0.141651 |
| KISS1    | 1.058946 | 0.16452  | 6.815991 | 0.951926 |
| NUDT9    | 0.25813  | 0.063655 | 1.046748 | 0.05796  |
| HSD17B13 | 0.355403 | 0.027834 | 4.537954 | 0.425988 |
| PA2G4    | 0.803382 | 0.384374 | 1.679152 | 0.560543 |
| ELOVL6   | 0.390752 | 0.165964 | 0.920003 | 0.031491 |
| PFKFB3   | 1.100498 | 0.788934 | 1.535104 | 0.572809 |
| ARL6IP1  | 1.454241 | 0.773962 | 2.732455 | 0.244539 |
| SERPINB9 | 2.516305 | 0.42635  | 14.85117 | 0.308304 |
| SMAGP    | 0.825712 | 0.262621 | 2.596141 | 0.743166 |
| IRX1     | 2.141268 | 0.716074 | 6.403006 | 0.173077 |
| CDH2     | 0.946776 | 0.769093 | 1.165509 | 0.606042 |
| EMB      | 1.63012  | 0.847014 | 3.137246 | 0.143497 |
| STAT2    | 1.086209 | 0.58823  | 2.005763 | 0.791582 |
| NUDCD2   | 1.012252 | 0.570426 | 1.796297 | 0.966807 |
| IRF2BP1  | 1.756231 | 0.906734 | 3.4016   | 0.09498  |
| HSPA4    | 0.403039 | 0.139663 | 1.163088 | 0.092848 |
| COMMD5   | 1.920745 | 0.329537 | 11.1953  | 0.468007 |
| GTSF1    | 0.970831 | 0.816925 | 1.153733 | 0.736761 |
| DPY19L2P | 0.084287 | 0.007688 | 0.924074 | 0.042909 |
| ZNF16    | 0.732404 | 0.136786 | 3.921569 | 0.716029 |
| ARMC10   | 0.391766 | 0.129297 | 1.187035 | 0.097556 |
| RNF34    | 3.411423 | 0.66345  | 17.54134 | 0.141875 |
| ACYP2    | 0.920721 | 0.208371 | 4.068355 | 0.913238 |
| TRABD    | 0.561893 | 0.268987 | 1.173754 | 0.125101 |
| ATF7     | 1.667769 | 0.227644 | 12.21846 | 0.614685 |
| ZNF296   | 1.152835 | 0.737301 | 1.802559 | 0.532868 |
| HOXB9    | 0.649845 | 0.235652 | 1.792046 | 0.404952 |
| TTLL6    | 1.236532 | 0.44667  | 3.423137 | 0.682785 |
| POLH     | 1.260245 | 0.259737 | 6.114725 | 0.77408  |
| KIF5B    | 0.733248 | 0.372782 | 1.442274 | 0.368689 |
| AKAP13   | 1.772409 | 0.883309 | 3.556439 | 0.107232 |
| CDCA4    | 1.447372 | 0.566186 | 3.699993 | 0.440045 |
| CHCHD7   | 0.635683 | 0.301635 | 1.339674 | 0.233599 |
| HTRA3    | 0.458021 | 0.095913 | 2.18723  | 0.327651 |
| FOXN2    | 0.914155 | 0.539597 | 1.548708 | 0.738608 |
| LMOD2    | 28.56777 | 1.786393 | 456.8519 | 0.017779 |
| USP32    | 0.300922 | 0.043814 | 2.066801 | 0.221894 |
| CEL      | 0.754502 | 0.476616 | 1.194405 | 0.229377 |
| PPM1D    | 0.823094 | 0.370776 | 1.827205 | 0.632308 |
| GPR27    | 0.808837 | 0.320859 | 2.038953 | 0.652902 |
| KBTBD2   | 0.987317 | 0.52622  | 1.852449 | 0.968288 |
| TRIAP1   | 0.310146 | 0.11833  | 0.812902 | 0.017251 |
| LSM3     | 1.00189  | 0.542324 | 1.850893 | 0.99519  |
| KIAA0232 | 0.882296 | 0.311779 | 2.496787 | 0.813472 |
| MTSS1    | 1.631438 | 1.121345 | 2.373571 | 0.010508 |
| TMEM43   | 1.09805  | 0.616026 | 1.957246 | 0.751112 |
| RNF139   | 0.211947 | 0.016308 | 2.754586 | 0.235775 |
| RPS9     | 2.08319  | 0.738333 | 5.877676 | 0.165519 |
| PLA2G1B  | 0.698312 | 0.308323 | 1.581584 | 0.389291 |
| CYTL1    | 0.850293 | 0.703201 | 1.028153 | 0.094234 |
| TSEN34   | 2.40772  | 1.153284 | 5.026615 | 0.019299 |
| TRH      | 0.841644 | 0.69077  | 1.025472 | 0.087189 |
| GSTA4    | 2.135387 | 0.897806 | 5.078914 | 0.086142 |
| NDUFA3   | 1.487159 | 0.586949 | 3.76803  | 0.402773 |
| OSCAR    | 1.239085 | 0.977875 | 1.570068 | 0.075941 |
| PAQR8    | 1.277549 | 0.828995 | 1.968809 | 0.266976 |
| NUDT6    | 1.960805 | 0.355754 | 10.80733 | 0.439404 |

|          |          |          |          |          |
|----------|----------|----------|----------|----------|
| TANC2    | 1.176935 | 0.451004 | 3.071316 | 0.739218 |
| DNAJC24  | 0.598534 | 0.197537 | 1.813549 | 0.364153 |
| ZNF160   | 0.920646 | 0.184681 | 4.589479 | 0.91965  |
| ZNF415   | 2.570057 | 1.184324 | 5.57718  | 0.016943 |
| CEACAM3  | 0.878562 | 0.48821  | 1.581023 | 0.66582  |
| PDGFD    | 1.33059  | 0.674939 | 2.623153 | 0.409508 |
| S1PR1    | 1.46707  | 0.911313 | 2.36175  | 0.114639 |
| PKIA     | 0.994205 | 0.531454 | 1.859888 | 0.98549  |
| XKR6     | 1.631817 | 0.194481 | 13.69196 | 0.651836 |
| TSNARE1  | 0.05045  | 0.003144 | 0.809506 | 0.034927 |
| FPR2     | 1.133055 | 0.753337 | 1.704168 | 0.548608 |
| FPR1     | 1.130441 | 0.946593 | 1.349995 | 0.175772 |
| FEZ2     | 1.148221 | 0.573599 | 2.298488 | 0.696303 |
| SOX7     | 0.018514 | 0.000654 | 0.523734 | 0.019324 |
| ALK      | 0.773975 | 0.200262 | 2.991264 | 0.710299 |
| MTM1     | 1.078083 | 0.502424 | 2.313309 | 0.846955 |
| INSR     | 0.444109 | 0.111002 | 1.776842 | 0.251223 |
| MFN1     | 0.120801 | 0.0119   | 1.226262 | 0.073862 |
| GIMAP8   | 1.45461  | 1.110342 | 1.90562  | 0.006537 |
| NRTN     | 0.885274 | 0.113899 | 6.880717 | 0.907278 |
| KCNMB3   | 0.239095 | 0.032103 | 1.780726 | 0.162497 |
| FUT3     | 0.621577 | 0.074412 | 5.192119 | 0.660622 |
| ATP6V0E2 | 1.72594  | 1.179944 | 2.524583 | 0.004912 |
| PRKCE    | 1.556379 | 0.711182 | 3.406042 | 0.268281 |
| JAGN1    | 1.100997 | 0.230564 | 5.257517 | 0.903993 |
| TADA3    | 0.899458 | 0.327216 | 2.472453 | 0.837269 |
| SOCS5    | 0.924363 | 0.09418  | 9.072474 | 0.946188 |
| C1GALT1C | 1.399532 | 0.576843 | 3.395534 | 0.457291 |
| MORN4    | 1.801268 | 0.339306 | 9.562346 | 0.489601 |
| ZNF672   | 0.631735 | 0.298281 | 1.337965 | 0.230315 |
| ZNF692   | 0.194998 | 0.06897  | 0.551315 | 0.00205  |
| NAIF1    | 2.174087 | 0.536001 | 8.818369 | 0.277012 |
| RBKS     | 0.942318 | 0.529459 | 1.677112 | 0.839922 |
| GRIK1    | 24.86917 | 0.309619 | 1997.535 | 0.150987 |
| TMEM126  | 0.34837  | 0.139509 | 0.86992  | 0.023919 |
| TMEM126l | 0.561728 | 0.267823 | 1.178159 | 0.126979 |
| TRIM8    | 1.518212 | 0.866275 | 2.66078  | 0.1447   |
| NETO2    | 1.179529 | 0.797873 | 1.743746 | 0.407762 |
| CLDN20   | 0.303475 | 0.06034  | 1.526303 | 0.147927 |
| CDC42BPC | 1.987107 | 0.107514 | 36.72646 | 0.6445   |
| SCAND1   | 1.703827 | 0.939945 | 3.088505 | 0.079108 |
| JUNB     | 1.32723  | 1.043806 | 1.687612 | 0.020901 |
| TMEM37   | 3.849648 | 0.650241 | 22.7912  | 0.137383 |
| LRG1     | 1.207909 | 0.856254 | 1.703986 | 0.28194  |
| SHCBP1   | 0.731179 | 0.201184 | 2.657379 | 0.634399 |
| SOSTDC1  | 0.132046 | 0.013703 | 1.272455 | 0.079857 |
| NPTX1    | 0.965737 | 0.291185 | 3.202942 | 0.954551 |
| FAM98B   | 0.26156  | 0.005767 | 11.86296 | 0.490775 |
| ZNF439   | 0.584299 | 0.327235 | 1.043302 | 0.069271 |
| ZNF440   | 0.571548 | 0.048918 | 6.67782  | 0.655579 |
| GAA      | 1.512583 | 1.078124 | 2.122119 | 0.016603 |
| CANT1    | 3.175803 | 1.601067 | 6.299377 | 0.000943 |
| ZDHHC16  | 0.409293 | 0.122973 | 1.362258 | 0.145372 |
| CHST11   | 0.380824 | 0.063803 | 2.27304  | 0.289538 |
| EXOSC1   | 0.365432 | 0.063901 | 2.089805 | 0.257845 |
| PGAM1    | 1.049424 | 0.60227  | 1.828564 | 0.864795 |
| CHD7     | 0.863062 | 0.603709 | 1.233833 | 0.419307 |
| ESCO2    | 0.404985 | 0.124432 | 1.318091 | 0.133288 |

|          |          |          |          |          |
|----------|----------|----------|----------|----------|
| KRT19    | 1.892874 | 0.10104  | 35.46101 | 0.66953  |
| CLCN5    | 2.420061 | 0.315284 | 18.57593 | 0.395369 |
| TPPP     | 2.287416 | 0.594702 | 8.798143 | 0.22865  |
| KCND3    | 11.59445 | 0.420273 | 319.8668 | 0.147669 |
| APLN     | 9.693745 | 1.079722 | 87.03045 | 0.042513 |
| PDE7B    | 1.824198 | 1.003538 | 3.315967 | 0.048661 |
| MRPL36   | 0.880702 | 0.402455 | 1.927259 | 0.750533 |
| ZNF581   | 2.382035 | 1.342566 | 4.226304 | 0.003008 |
| NAT1     | 3.883305 | 0.940929 | 16.02678 | 0.060686 |
| GLOD5    | 0.1778   | 0.020248 | 1.561313 | 0.119223 |
| ZNF524   | 2.065224 | 1.105979 | 3.856447 | 0.02284  |
| MCC      | 0.124985 | 0.007821 | 1.997287 | 0.141369 |
| ZBTB26   | 1.057815 | 0.448835 | 2.49306  | 0.897756 |
| DSEL     | 6.153657 | 0.261264 | 144.9396 | 0.259629 |
| POLR1C   | 0.565908 | 0.27658  | 1.1579   | 0.11909  |
| ASXL1    | 1.602189 | 0.621607 | 4.129636 | 0.329182 |
| DLK2     | 0.165646 | 0.002093 | 13.10858 | 0.420155 |
| ZNF562   | 0.402463 | 0.177409 | 0.913012 | 0.029427 |
| ZNF318   | 1.04964  | 0.494458 | 2.228184 | 0.899616 |
| ZNF561   | 1.507723 | 0.503612 | 4.513845 | 0.463007 |
| WIPF2    | 0.856412 | 0.125939 | 5.823803 | 0.874078 |
| HOPX     | 1.522488 | 0.973161 | 2.381897 | 0.065648 |
| LRR8C    | 1.283502 | 0.790136 | 2.084931 | 0.313288 |
| RSL1D1   | 0.70846  | 0.482793 | 1.039606 | 0.078161 |
| LRR8D    | 4.298558 | 1.505621 | 12.27241 | 0.00644  |
| PPID     | 0.904358 | 0.330191 | 2.476941 | 0.844957 |
| COL24A1  | 0.83135  | 0.593179 | 1.16515  | 0.283512 |
| ETFDH    | 0.587989 | 0.282821 | 1.222439 | 0.154995 |
| RXFP1    | 2.108788 | 1.357762 | 3.275234 | 0.000895 |
| LPAR3    | 0.327549 | 0.072936 | 1.470996 | 0.145291 |
| PTGER4   | 1.029695 | 0.704328 | 1.505367 | 0.879959 |
| TBCA     | 0.118465 | 0.033822 | 0.414935 | 0.000852 |
| ECEL1    | 0.048614 | 0.002349 | 1.006    | 0.050454 |
| BCL2L1   | 1.26022  | 0.903672 | 1.757445 | 0.172871 |
| PLRG1    | 0.802409 | 0.458585 | 1.404015 | 0.440594 |
| ZNF584   | 1.157332 | 0.24942  | 5.370126 | 0.851973 |
| NMUR1    | 1.170135 | 0.330371 | 4.144477 | 0.807616 |
| CLSTN1   | 1.406606 | 0.646567 | 3.06007  | 0.389606 |
| CXXC5    | 1.470493 | 0.958752 | 2.255378 | 0.077238 |
| ZNF274   | 0.277743 | 0.097045 | 0.7949   | 0.016949 |
| PIK3CD   | 1.326591 | 0.766601 | 2.295644 | 0.312473 |
| PTCRA    | 1.208513 | 0.683354 | 2.137258 | 0.514998 |
| SLC25A33 | 1.723779 | 0.751773 | 3.952544 | 0.198416 |
| ENC1     | 1.404668 | 0.835639 | 2.361177 | 0.199721 |
| SPSB1    | 3.502792 | 0.822637 | 14.91489 | 0.089916 |
| P2RY6    | 2.148608 | 0.193934 | 23.80465 | 0.533102 |
| BPTF     | 0.439743 | 0.067624 | 2.859535 | 0.389752 |
| S100Z    | 0.944007 | 0.488771 | 1.823246 | 0.863772 |
| ZIK1     | 0.779014 | 0.332625 | 1.824469 | 0.565196 |
| GPR82    | 4.822311 | 0.221976 | 104.7623 | 0.316513 |
| GPR34    | 1.635831 | 0.489869 | 5.462574 | 0.423719 |
| PLEKHG5  | 0.939073 | 0.00803  | 109.8218 | 0.979357 |
| ATF7IP   | 12.57437 | 1.935892 | 81.67543 | 0.008004 |
| RGS19    | 1.547776 | 0.997395 | 2.401868 | 0.051376 |
| TCEA2    | 1.575009 | 0.562193 | 4.412459 | 0.387446 |
| HDAC3    | 1.449106 | 0.519064 | 4.045569 | 0.47885  |
| GPHN     | 0.627306 | 0.258574 | 1.521855 | 0.30241  |
| VAT1L    | 0.282107 | 0.047809 | 1.664637 | 0.16233  |

|          |          |          |          |          |
|----------|----------|----------|----------|----------|
| TMEM51   | 1.337626 | 1.027681 | 1.74105  | 0.030542 |
| CAMTA1   | 4.51668  | 0.767497 | 26.58042 | 0.095447 |
| LGALS4   | 0.44148  | 0.071124 | 2.740336 | 0.380079 |
| LRRC34   | 0.316402 | 0.084905 | 1.17909  | 0.086435 |
| SPATA5L1 | 1.802662 | 0.866141 | 3.7518   | 0.115097 |
| GATM     | 0.232484 | 0.073529 | 0.735069 | 0.012991 |
| RASGRP4  | 4.493275 | 1.404581 | 14.37406 | 0.011322 |
| SLFNL1   | 0.028142 | 0.001623 | 0.488022 | 0.014176 |
| BCL2     | 0.406207 | 0.152972 | 1.078652 | 0.070604 |
| UTF1     | 1.788951 | 0.97381  | 3.286418 | 0.060871 |
| COL8A2   | 2.328497 | 1.296859 | 4.180794 | 0.004648 |
| PWWP2B   | 2.709551 | 1.026974 | 7.148835 | 0.044037 |
| ZNF540   | 0.166827 | 0.026615 | 1.045678 | 0.055842 |
| ANGPTL7  | 0.094796 | 0.004704 | 1.910297 | 0.124157 |
| FBXL14   | 5.313449 | 0.684704 | 41.23353 | 0.11012  |
| EXOSC10  | 0.327937 | 0.115201 | 0.933523 | 0.036722 |
| ZNF570   | 0.15811  | 0.025848 | 0.967152 | 0.045922 |
| NINJ2    | 0.816004 | 0.583557 | 1.141042 | 0.234573 |
| MLLT3    | 0.792157 | 0.139372 | 4.502438 | 0.792697 |
| FAM90A1  | 0.529266 | 0.150771 | 1.857936 | 0.320666 |
| RRM2     | 0.675181 | 0.389156 | 1.171433 | 0.162373 |
| IFNB1    | 0.555561 | 0.112241 | 2.749861 | 0.47133  |
| RPS21    | 1.629395 | 0.750489 | 3.537597 | 0.217094 |
| C3AR1    | 1.180954 | 0.836338 | 1.667571 | 0.344779 |
| PTEN     | 0.468165 | 0.27175  | 0.806545 | 0.006245 |
| RPS7     | 0.775714 | 0.387734 | 1.55192  | 0.472875 |
| RNASEH1  | 0.563025 | 0.272127 | 1.164886 | 0.121495 |
| PRNP     | 0.898216 | 0.54317  | 1.485338 | 0.675739 |
| FRMD5    | 0.155615 | 0.003331 | 7.268782 | 0.34284  |
| CYP4F11  | 1.569951 | 0.333002 | 7.401592 | 0.568608 |
| TLN2     | 0.944479 | 0.411586 | 2.167327 | 0.89278  |
| ZNF217   | 1.401603 | 0.905676 | 2.169087 | 0.129696 |
| SCG2     | 0.8854   | 0.538368 | 1.456129 | 0.63157  |
| ATPAF2   | 0.56068  | 0.22048  | 1.425805 | 0.224352 |
| CYP4F22  | 1.734248 | 0.400262 | 7.51413  | 0.461741 |
| PIIH     | 0.567205 | 0.279208 | 1.152265 | 0.116873 |
| ZNF57    | 0.653715 | 0.147568 | 2.895912 | 0.575638 |
| JMJD1C   | 1.340434 | 0.610168 | 2.9447   | 0.465595 |
| SYNPO    | 0.541175 | 0.066845 | 4.381335 | 0.564998 |
| MAL      | 1.022572 | 0.737989 | 1.416895 | 0.893293 |
| ZNF554   | 0.070428 | 0.006173 | 0.803463 | 0.032667 |
| RAB33B   | 1.20822  | 0.759117 | 1.923017 | 0.425052 |
| THOP1    | 1.283578 | 0.731988 | 2.250816 | 0.38364  |
| LAMB2    | 1.536424 | 1.126033 | 2.096386 | 0.006756 |
| USP19    | 2.574416 | 0.61836  | 10.71806 | 0.193797 |
| ORMDL3   | 1.262052 | 0.604876 | 2.633225 | 0.535108 |
| KLF11    | 1.173093 | 0.749737 | 1.835506 | 0.484594 |
| SMN1     | 2.270812 | 0.44074  | 11.69983 | 0.326848 |
| EIF2AK3  | 1.186654 | 0.356876 | 3.945769 | 0.780115 |
| KRCC1    | 1.772646 | 0.910406 | 3.451507 | 0.092206 |
| NME6     | 0.407458 | 0.140172 | 1.18441  | 0.099128 |
| CYCS     | 0.169166 | 0.055001 | 0.520302 | 0.001937 |
| CD8B     | 0.925486 | 0.0819   | 10.45822 | 0.950092 |
| SLFN12   | 1.503105 | 0.596044 | 3.790538 | 0.387842 |
| FRMD3    | 0.906214 | 0.609087 | 1.348285 | 0.627104 |
| SNTB1    | 0.418061 | 0.208001 | 0.84026  | 0.014341 |
| MTBP     | 0.088455 | 0.014927 | 0.524177 | 0.007552 |
| MRPL13   | 0.694489 | 0.320721 | 1.503844 | 0.355031 |

|         |          |          |          |          |
|---------|----------|----------|----------|----------|
| MALT1   | 0.878746 | 0.304619 | 2.534948 | 0.811004 |
| PRL     | 1.355634 | 0.804531 | 2.284241 | 0.253055 |
| ISG20   | 1.450403 | 1.052431 | 1.998865 | 0.023072 |
| MBOAT1  | 0.343582 | 0.115787 | 1.019539 | 0.054217 |
| GPR22   | 0.167573 | 0.016428 | 1.709309 | 0.131672 |
| CXCR6   | 1.032183 | 0.18863  | 5.648116 | 0.970861 |
| CEBPB   | 1.399752 | 1.004912 | 1.949728 | 0.046707 |
| AZU1    | 1.094245 | 0.914797 | 1.308894 | 0.32437  |
| TPSAB1  | 1.200546 | 1.001511 | 1.439136 | 0.048122 |
| PAIP1   | 0.591799 | 0.055805 | 6.275896 | 0.663253 |
| CLEC7A  | 1.577938 | 1.139137 | 2.185767 | 0.006078 |
| C1QTNF4 | 0.840217 | 0.667915 | 1.056967 | 0.137065 |
| SERHL   | 22.9269  | 1.900337 | 276.6051 | 0.013691 |
| NEGR1   | 0.534637 | 0.238519 | 1.19838  | 0.128382 |
| ZNF131  | 0.671816 | 0.375257 | 1.20274  | 0.180672 |
| MACROD2 | 0.156849 | 0.002955 | 8.325807 | 0.360648 |
| DPAGT1  | 0.449612 | 0.197975 | 1.021095 | 0.056123 |
| BSG     | 1.560775 | 0.643518 | 3.785468 | 0.324711 |
| HINFP   | 0.430096 | 0.115862 | 1.596579 | 0.207371 |
| SPTLC3  | 0.246405 | 0.064648 | 0.939168 | 0.04018  |
| TP53RK  | 1.002015 | 0.600479 | 1.672054 | 0.993853 |
| CLEC12A | 0.978612 | 0.648877 | 1.475905 | 0.91786  |
| BPGM    | 1.076145 | 0.703454 | 1.646289 | 0.735124 |
| POP7    | 1.257503 | 0.607187 | 2.604327 | 0.537345 |
| ALG14   | 1.181179 | 0.305295 | 4.569952 | 0.809389 |
| SUCLG2  | 1.286454 | 0.969318 | 1.707348 | 0.081127 |
| STARD5  | 1.934125 | 0.370664 | 10.09226 | 0.433878 |
| CSDC2   | 2.148267 | 0.328818 | 14.03529 | 0.424582 |
| IL16    | 1.471943 | 0.685437 | 3.160924 | 0.321503 |
| GNB2    | 2.270824 | 1.321049 | 3.903442 | 0.003004 |
| PDZD3   | 1.610888 | 0.144214 | 17.99387 | 0.698586 |
| C2CD2L  | 1.196984 | 0.430222 | 3.330304 | 0.730545 |
| GNG12   | 0.243238 | 0.01827  | 3.238375 | 0.284475 |
| PRSS27  | 0.336799 | 0.04832  | 2.347554 | 0.27197  |
| DNAJB7  | 0.131389 | 0.005385 | 3.205512 | 0.213037 |
| CLP1    | 0.759019 | 0.272397 | 2.114965 | 0.597946 |
| TTC36   | 0.288627 | 0.028117 | 2.96277  | 0.295636 |
| RSPH9   | 4.3557   | 0.36215  | 52.38743 | 0.246224 |
| GTPBP2  | 0.56435  | 0.175427 | 1.815517 | 0.337252 |
| FGGY    | 1.206402 | 0.452669 | 3.21517  | 0.707521 |
| IL17D   | 1.202386 | 0.659482 | 2.192223 | 0.54754  |
| TCEAL1  | 0.680057 | 0.276565 | 1.672223 | 0.400943 |
| ZNF24   | 0.768516 | 0.348951 | 1.692549 | 0.513361 |
| MANEA   | 1.331383 | 0.093091 | 19.04142 | 0.832995 |
| AGXT    | 1.209885 | 0.92547  | 1.581706 | 0.163476 |
| AFF1    | 0.908522 | 0.358798 | 2.300492 | 0.839612 |
| ACOT12  | 0.061059 | 0.00397  | 0.938978 | 0.04495  |
| FIBP    | 1.136763 | 0.440024 | 2.936723 | 0.791235 |
| BANP    | 1.864357 | 0.672078 | 5.171757 | 0.23146  |
| PPP1CA  | 2.296538 | 1.083218 | 4.868908 | 0.030124 |
| HCFC1   | 0.525886 | 0.228138 | 1.212232 | 0.131484 |
| CTSW    | 0.767939 | 0.597545 | 0.986923 | 0.039132 |
| NIPAL4  | 0.79833  | 0.011265 | 56.57581 | 0.917481 |
| PDE3A   | 0.282715 | 0.039175 | 2.040263 | 0.210274 |
| RASGRP1 | 1.040613 | 0.676827 | 1.59993  | 0.856058 |
| KLHL6   | 0.997656 | 0.529461 | 1.879869 | 0.994206 |
| CHCHD1  | 1.390695 | 0.535897 | 3.608961 | 0.497871 |
| MRPL52  | 0.661553 | 0.36529  | 1.198095 | 0.172721 |



|          |          |          |          |          |
|----------|----------|----------|----------|----------|
| SMPDL3A  | 1.307717 | 0.924023 | 1.850737 | 0.130018 |
| RND1     | 0.29731  | 0.024962 | 3.541175 | 0.337247 |
| RAD9A    | 0.650543 | 0.276272 | 1.531849 | 0.325138 |
| EFEMP2   | 0.466155 | 0.188178 | 1.154761 | 0.099134 |
| OR10AD1  | 2.07396  | 0.359221 | 11.97399 | 0.414813 |
| TMEM134  | 2.0922   | 1.019273 | 4.29453  | 0.044221 |
| ZMAT3    | 0.829856 | 0.489984 | 1.405476 | 0.487818 |
| ZNF738   | 1.003911 | 0.541554 | 1.861012 | 0.990109 |
| SLFN11   | 0.93855  | 0.486662 | 1.810036 | 0.84989  |
| CORO1B   | 1.646434 | 1.029124 | 2.634031 | 0.037553 |
| FUT10    | 1.268211 | 0.091151 | 17.64498 | 0.859602 |
| LRRC20   | 2.12514  | 0.787591 | 5.734222 | 0.136622 |
| MUS81    | 0.61603  | 0.210974 | 1.798763 | 0.375556 |
| TMEM217  | 2.22131  | 0.678794 | 7.2691   | 0.187022 |
| ZNF596   | 1.975922 | 0.108252 | 36.06648 | 0.64581  |
| CFL1     | 2.26531  | 0.791036 | 6.487224 | 0.127687 |
| TMCC1    | 0.315274 | 0.026695 | 3.723501 | 0.359491 |
| RAB43    | 1.690043 | 0.572743 | 4.986956 | 0.341863 |
| CBWD1    | 1.725293 | 0.195615 | 15.21681 | 0.62341  |
| RAB37    | 0.681187 | 0.331489 | 1.399793 | 0.296143 |
| DCP2     | 0.804637 | 0.451396 | 1.434306 | 0.461116 |
| SNX32    | 1.75609  | 0.314254 | 9.813249 | 0.521257 |
| RPL38    | 16.69614 | 0.38596  | 722.2542 | 0.143015 |
| CYP7B1   | 0.181263 | 0.029661 | 1.10772  | 0.06443  |
| RARG     | 0.065304 | 0.005833 | 0.731083 | 0.02682  |
| CES3     | 6.903961 | 1.100571 | 43.30906 | 0.039184 |
| SSH3     | 0.794663 | 0.205233 | 3.076941 | 0.739321 |
| CES2     | 0.759662 | 0.322478 | 1.789537 | 0.529496 |
| PDP2     | 0.744785 | 0.107952 | 5.138421 | 0.764927 |
| SP3      | 3.153695 | 0.994277 | 10.00303 | 0.05115  |
| DMXL1    | 0.741538 | 0.347423 | 1.582732 | 0.439513 |
| ZNF621   | 0.635466 | 0.356846 | 1.131628 | 0.12357  |
| EGFL7    | 1.093848 | 0.757268 | 1.580028 | 0.632587 |
| NADSYN1  | 0.773516 | 0.361603 | 1.654652 | 0.508012 |
| DHCR7    | 1.401864 | 0.842406 | 2.332869 | 0.193604 |
| NBEA     | 2.076512 | 0.596658 | 7.22676  | 0.250819 |
| RNASEH2C | 0.456665 | 0.185852 | 1.122092 | 0.087484 |
| MYEOV    | 1.941501 | 0.370016 | 10.18719 | 0.432776 |
| ANKRD13I | 1.139552 | 0.311987 | 4.162294 | 0.84332  |
| MYD88    | 1.422339 | 0.822662 | 2.459151 | 0.207251 |
| MRGPRD   | 1.791736 | 0.172277 | 18.63461 | 0.625488 |
| OXSR1    | 0.42701  | 0.200399 | 0.909871 | 0.027477 |
| SLC22A13 | 0.185337 | 0.009021 | 3.807923 | 0.274408 |
| PHF8     | 3.390942 | 0.069279 | 165.9735 | 0.538464 |
| LCLAT1   | 0.370852 | 0.088722 | 1.550138 | 0.174054 |
| KAT5     | 5.700077 | 1.242735 | 26.14464 | 0.025117 |
| SH3RF3   | 1.422029 | 0.335465 | 6.027947 | 0.632804 |
| GXYLT2   | 4.895249 | 0.488766 | 49.0285  | 0.176688 |
| HPSE2    | 6.263059 | 0.799554 | 49.05976 | 0.080645 |
| DCAKD    | 0.331453 | 0.173007 | 0.63501  | 0.000872 |
| TADA2B   | 1.404703 | 0.771515 | 2.557551 | 0.266347 |
| CCDC96   | 4.438108 | 0.594011 | 33.15897 | 0.146405 |
| RELA     | 1.958135 | 0.779178 | 4.920948 | 0.152928 |
| EVC2     | 4.988643 | 0.466784 | 53.31495 | 0.183637 |
| ZNF680   | 0.971915 | 0.536136 | 1.761903 | 0.925224 |
| RXFP4    | 2.149651 | 0.277861 | 16.6306  | 0.46347  |
| HPSE     | 2.180463 | 1.244681 | 3.819788 | 0.006428 |
| COQ2     | 0.600086 | 0.273045 | 1.318845 | 0.203691 |

|          |          |          |          |          |
|----------|----------|----------|----------|----------|
| HSPA6    | 1.133995 | 0.845875 | 1.520255 | 0.400469 |
| TRMT112  | 2.345789 | 1.054334 | 5.21915  | 0.036651 |
| LRRN3    | 1.84836  | 0.566894 | 6.026577 | 0.308337 |
| ADCK5    | 2.021223 | 0.813    | 5.025021 | 0.129917 |
| NOC3L    | 0.815795 | 0.426889 | 1.559005 | 0.537806 |
| ESRRA    | 3.87881  | 1.751111 | 8.591784 | 0.000836 |
| COMMD1   | 0.519428 | 0.185655 | 1.453261 | 0.212088 |
| RAPH1    | 19.38906 | 1.649576 | 227.8983 | 0.01837  |
| MTX1     | 1.017586 | 0.446417 | 2.319536 | 0.966921 |
| PARP14   | 1.095266 | 0.630417 | 1.902878 | 0.746784 |
| CYSLTR1  | 1.545676 | 0.897114 | 2.663109 | 0.116691 |
| PARP15   | 0.852343 | 0.330426 | 2.198648 | 0.741062 |
| CKS1B    | 0.487827 | 0.287156 | 0.828729 | 0.007936 |
| ABCD2    | 0.477984 | 0.006047 | 37.78496 | 0.740592 |
| ABLIM3   | 0.817587 | 0.339287 | 1.970158 | 0.65357  |
| VANGL1   | 1.249948 | 0.31184  | 5.010164 | 0.752796 |
| GLRX     | 1.101092 | 0.720956 | 1.681661 | 0.655805 |
| IQCB1    | 0.530353 | 0.174994 | 1.607339 | 0.262258 |
| GOLGB1   | 0.767698 | 0.456156 | 1.292014 | 0.319572 |
| ZNF483   | 2.173077 | 0.411185 | 11.48452 | 0.360863 |
| PLAC8L1  | 0.064953 | 0.006311 | 0.668441 | 0.021527 |
| SLC2A14  | 1.200234 | 0.829048 | 1.737609 | 0.333623 |
| GPR137   | 1.573706 | 0.795006 | 3.115135 | 0.193088 |
| SNCG     | 0.123293 | 0.00657  | 2.313862 | 0.161756 |
| MMRN2    | 0.184462 | 0.019229 | 1.769558 | 0.142858 |
| TNKS     | 1.28546  | 0.175693 | 9.405076 | 0.804668 |
| ZNF449   | 0.085481 | 0.008037 | 0.909161 | 0.041459 |
| PPP1R3B  | 0.880009 | 0.054703 | 14.1567  | 0.928142 |
| STOX2    | 0.829943 | 0.500003 | 1.377603 | 0.470944 |
| MAP3K11  | 2.381675 | 1.366163 | 4.15205  | 0.002212 |
| TRIB1    | 1.129308 | 0.914354 | 1.394796 | 0.258975 |
| KCNK7    | 0.954751 | 0.080902 | 11.26737 | 0.970669 |
| C1QB     | 1.337884 | 1.091148 | 1.640413 | 0.005132 |
| C1QA     | 1.781784 | 1.152941 | 2.753616 | 0.009302 |
| OLR1     | 0.963979 | 0.765556 | 1.213832 | 0.755054 |
| GLIPR1L1 | 0.086639 | 0.007979 | 0.940731 | 0.044413 |
| DAG1     | 1.689889 | 0.470858 | 6.064937 | 0.420982 |
| ARV1     | 0.498141 | 0.250507 | 0.990569 | 0.046925 |
| SAA1     | 0.184594 | 0.004621 | 7.373676 | 0.369162 |
| EHBP1L1  | 1.35166  | 0.844437 | 2.163554 | 0.209304 |
| THAP2    | 1.713048 | 0.1511   | 19.4211  | 0.663927 |
| RNF26    | 1.38786  | 0.650304 | 2.961931 | 0.396766 |
| PPP1R14B | 1.194757 | 0.674948 | 2.114896 | 0.541382 |
| SMARCC1  | 0.722748 | 0.457909 | 1.140759 | 0.163196 |
| ZNF417   | 0.409189 | 0.059892 | 2.795639 | 0.362085 |
| PTPRM    | 1.318703 | 0.756165 | 2.299732 | 0.329577 |
| FKBP2    | 1.840458 | 0.528882 | 6.404619 | 0.337668 |
| VEGFB    | 1.236856 | 0.317421 | 4.819506 | 0.759355 |
| TNFRSF10 | 0.604527 | 0.180317 | 2.026719 | 0.414817 |
| MST1     | 0.968241 | 0.558758 | 1.677812 | 0.908396 |
| TNFRSF10 | 0.408298 | 0.055851 | 2.984833 | 0.377481 |
| GMPPB    | 0.954241 | 0.240661 | 3.783644 | 0.946866 |
| ZNF622   | 1.03513  | 0.370315 | 2.893464 | 0.947511 |
| CSPG4    | 2.378275 | 0.761694 | 7.425806 | 0.135862 |
| SNX33    | 2.767507 | 1.363717 | 5.616339 | 0.004816 |
| CHD2     | 0.451086 | 0.083342 | 2.441496 | 0.3555   |
| CCDC106  | 1.465442 | 0.914346 | 2.348697 | 0.112311 |
| CCR9     | 1.142676 | 0.068772 | 18.98601 | 0.925891 |

|          |          |          |          |          |
|----------|----------|----------|----------|----------|
| SULT1B1  | 1.723403 | 0.811982 | 3.657862 | 0.156325 |
| NUDT4    | 0.035578 | 0.000959 | 1.320012 | 0.070392 |
| PC       | 5.563715 | 1.384795 | 22.35343 | 0.015573 |
| NMNAT1   | 0.881645 | 0.230034 | 3.379061 | 0.854205 |
| LRFN4    | 1.446856 | 0.856615 | 2.443794 | 0.167201 |
| SLC19A1  | 1.525256 | 0.799178 | 2.910998 | 0.200482 |
| HSPB7    | 1.705085 | 0.09242  | 31.45765 | 0.719757 |
| RCE1     | 2.202332 | 0.856942 | 5.659971 | 0.101132 |
| UQCRH    | 1.022984 | 0.492076 | 2.126697 | 0.951473 |
| TAS1R1   | 0.208898 | 0.004608 | 9.470807 | 0.421008 |
| EIF1AX   | 0.618188 | 0.2621   | 1.45806  | 0.271946 |
| PSMD1    | 0.546636 | 0.220036 | 1.358011 | 0.19331  |
| SUSD5    | 1.517213 | 0.135    | 17.05139 | 0.735576 |
| HEG1     | 2.923077 | 1.343751 | 6.358604 | 0.006828 |
| TOMM20   | 0.520118 | 0.29843  | 0.906488 | 0.021091 |
| AGFG1    | 0.666703 | 0.281235 | 1.580503 | 0.357277 |
| STAT5B   | 0.524012 | 0.208132 | 1.319304 | 0.170138 |
| CD7      | 0.780429 | 0.6092   | 0.999784 | 0.049801 |
| CNP      | 1.911557 | 0.259854 | 14.06193 | 0.52454  |
| JUP      | 0.981312 | 0.626118 | 1.538007 | 0.934422 |
| HAP1     | 0.007676 | 9.70E-05 | 0.60741  | 0.028998 |
| EIF1     | 0.676139 | 0.392624 | 1.164383 | 0.158192 |
| RNF213   | 1.035575 | 0.689938 | 1.554366 | 0.866027 |
| TIGD3    | 0.646615 | 0.054085 | 7.730659 | 0.730537 |
| PLK3     | 1.527874 | 0.61901  | 3.77118  | 0.357831 |
| NET1     | 1.058943 | 0.583929 | 1.920371 | 0.850424 |
| DPY19L1  | 0.844147 | 0.442511 | 1.61032  | 0.607143 |
| PHOSPHO  | 1.180547 | 0.544213 | 2.560928 | 0.674423 |
| ZNF791   | 1.120035 | 0.626293 | 2.00302  | 0.702301 |
| PHC3     | 0.769887 | 0.345298 | 1.716565 | 0.522677 |
| GPR160   | 0.734297 | 0.462092 | 1.166852 | 0.191227 |
| CBX2     | 0.853546 | 0.412456 | 1.766347 | 0.669551 |
| SPTBN2   | 0.519994 | 0.087109 | 3.104083 | 0.473145 |
| GOLIM4   | 0.521456 | 0.219841 | 1.236876 | 0.139527 |
| RBM4B    | 0.785186 | 0.438709 | 1.405298 | 0.415477 |
| HOXB2    | 1.274442 | 1.030274 | 1.576476 | 0.02543  |
| SLCO4C1  | 0.767188 | 0.303452 | 1.939607 | 0.575456 |
| RBM4     | 0.719733 | 0.137774 | 3.759907 | 0.696623 |
| UBXN2A   | 0.72679  | 0.383072 | 1.378913 | 0.328743 |
| RAX2     | 1.583616 | 0.63393  | 3.956015 | 0.325042 |
| TCAP     | 0.997359 | 0.055627 | 17.88212 | 0.998567 |
| CCS      | 1.268938 | 0.620291 | 2.595883 | 0.514258 |
| KLHL15   | 0.451101 | 0.242245 | 0.840027 | 0.012091 |
| FBXO45   | 1.541761 | 0.408443 | 5.819728 | 0.522962 |
| GNG5     | 1.651266 | 0.780637 | 3.492889 | 0.189488 |
| SLC25A30 | 0.69449  | 0.109269 | 4.414027 | 0.699214 |
| CD34     | 0.974838 | 0.733995 | 1.294708 | 0.860283 |
| CTSF     | 1.450483 | 0.936433 | 2.246717 | 0.095756 |
| MSRB3    | 0.770109 | 0.489551 | 1.211452 | 0.25843  |
| LEMD3    | 1.094486 | 0.512328 | 2.338148 | 0.815669 |
| TLR10    | 0.701918 | 0.183482 | 2.685222 | 0.605132 |
| TLR1     | 1.188656 | 0.817665 | 1.727972 | 0.365261 |
| TLR6     | 1.257646 | 0.596142 | 2.653186 | 0.547262 |
| FAM174A  | 1.242938 | 0.450113 | 3.432238 | 0.674745 |
| RGMB     | 0.649412 | 0.026339 | 16.01203 | 0.791788 |
| FAM53A   | 1.460979 | 0.670712 | 3.18238  | 0.339873 |
| CYB561D1 | 0.710526 | 0.310083 | 1.628104 | 0.419194 |
| ZDHHC24  | 1.507455 | 0.773024 | 2.939651 | 0.228415 |

|          |          |          |          |          |
|----------|----------|----------|----------|----------|
| SELP     | 0.961404 | 0.464128 | 1.991472 | 0.915634 |
| CTU2     | 2.992355 | 0.589803 | 15.18165 | 0.185907 |
| MGA      | 0.178109 | 0.025657 | 1.236416 | 0.080934 |
| ARL13A   | 1.814616 | 0.125262 | 26.28767 | 0.662195 |
| PIGG     | 0.746477 | 0.201977 | 2.758866 | 0.6611   |
| PRPF8    | 0.880343 | 0.409588 | 1.892158 | 0.744087 |
| ADCY6    | 2.012628 | 1.062488 | 3.812439 | 0.031879 |
| PITPNA   | 0.791931 | 0.283602 | 2.211392 | 0.656143 |
| DDX23    | 0.672282 | 0.240094 | 1.882442 | 0.44974  |
| ZNHIT2   | 2.431573 | 1.367212 | 4.324529 | 0.002489 |
| ZBTB4    | 2.965039 | 1.213457 | 7.244965 | 0.017107 |
| TNK1     | 0.797683 | 0.117376 | 5.421027 | 0.817166 |
| ZHX3     | 0.629285 | 0.214053 | 1.850009 | 0.399882 |
| PHLDA3   | 1.25796  | 0.528925 | 2.991851 | 0.603653 |
| SLC16A11 | 0.298981 | 0.022816 | 3.917811 | 0.357707 |
| SLC16A13 | 1.519907 | 0.129622 | 17.82199 | 0.7389   |
| STAG3L3  | 0.675825 | 0.473407 | 0.964792 | 0.030982 |
| SLC6A19  | 3.003005 | 0.208609 | 43.22942 | 0.419017 |
| SNHG11   | 0.586541 | 0.165955 | 2.073037 | 0.407539 |
| EXO1     | 0.303054 | 0.08228  | 1.116205 | 0.072702 |
| RALGAPA1 | 0.50072  | 0.194463 | 1.289297 | 0.151742 |
| LIG4     | 4.648604 | 0.435362 | 49.63574 | 0.203473 |
| GTF2IRD2 | 0.634547 | 0.213628 | 1.884821 | 0.412865 |
| ABRA     | 0.074952 | 0.002695 | 2.084272 | 0.126738 |
| ATP2A2   | 2.223716 | 0.863137 | 5.729002 | 0.097896 |
| ZWILCH   | 0.166141 | 0.042787 | 0.645119 | 0.009508 |
| RPL4     | 0.645111 | 0.327831 | 1.26946  | 0.204389 |
| SNAPC5   | 0.264249 | 0.068038 | 1.026296 | 0.054547 |
| ZCCHC12  | 0.513777 | 0.156684 | 1.684704 | 0.271715 |
| GALNTL6  | 1.762414 | 0.238396 | 13.02916 | 0.578758 |
| LINGO2   | 0.867179 | 0.076464 | 9.834662 | 0.90843  |
| BBS1     | 1.40609  | 0.573266 | 3.448815 | 0.456573 |
| DENND4A  | 0.727993 | 0.233757 | 2.267202 | 0.583883 |
| PELI3    | 0.856377 | 0.215041 | 3.410421 | 0.825945 |
| TTC9B    | 0.191216 | 0.009459 | 3.865324 | 0.2808   |
| MYO1H    | 1.205124 | 0.123395 | 11.76973 | 0.872514 |
| TMEM81   | 0.277409 | 0.034191 | 2.250758 | 0.229963 |
| MRPL11   | 1.042554 | 0.374166 | 2.904908 | 0.93647  |
| IL20RB   | 0.699292 | 0.066617 | 7.340616 | 0.765566 |
| AKIRIN1  | 0.533114 | 0.233448 | 1.217449 | 0.135447 |
| MSL2     | 1.136082 | 0.276553 | 4.667032 | 0.859524 |
| ZNF497   | 0.662579 | 0.083513 | 5.256804 | 0.696891 |
| CMKLR1   | 2.96221  | 0.748228 | 11.72729 | 0.121907 |
| ANGEL2   | 0.658393 | 0.317516 | 1.365227 | 0.261322 |
| UGT8     | 0.572025 | 0.014059 | 23.275   | 0.767679 |
| KY       | 3.352619 | 0.148294 | 75.7958  | 0.447036 |
| IQCK     | 1.185286 | 0.652333 | 2.153659 | 0.576919 |
| ZNF266   | 0.619635 | 0.208624 | 1.840382 | 0.388831 |
| SLC29A2  | 1.55412  | 0.979408 | 2.46607  | 0.061256 |
| BRSK2    | 0.206798 | 0.031384 | 1.36266  | 0.10136  |
| TMEM167  | 1.275366 | 0.750272 | 2.167958 | 0.368893 |
| SH3PXD2E | 1.923493 | 0.61689  | 5.997541 | 0.25957  |
| LARP7    | 1.181271 | 0.64693  | 2.15696  | 0.587624 |
| FGFBP3   | 0.787757 | 0.148614 | 4.175665 | 0.779208 |
| NR1D2    | 0.766679 | 0.249862 | 2.352491 | 0.642317 |
| BRMS1    | 3.016833 | 0.931968 | 9.765663 | 0.065416 |
| RPL15    | 0.93882  | 0.524195 | 1.681403 | 0.831852 |
| HRAS     | 1.205245 | 0.370548 | 3.920185 | 0.756393 |

|          |          |          |          |          |
|----------|----------|----------|----------|----------|
| WDR49    | 1.668655 | 0.989624 | 2.813602 | 0.054753 |
| SRP72    | 0.567519 | 0.281136 | 1.145628 | 0.113964 |
| PCP2     | 0.561105 | 0.105003 | 2.998378 | 0.499177 |
| RIN1     | 1.488485 | 0.768663 | 2.882393 | 0.238135 |
| THAP6    | 0.740249 | 0.141887 | 3.862    | 0.721206 |
| CEP135   | 0.539057 | 0.301982 | 0.962252 | 0.036607 |
| FZD4     | 0.175412 | 0.009488 | 3.24292  | 0.242201 |
| CD248    | 1.435792 | 0.894351 | 2.305022 | 0.134222 |
| PDZK1    | 1.24622  | 0.04696  | 33.07232 | 0.895311 |
| PDE12    | 0.674248 | 0.248406 | 1.830109 | 0.439126 |
| GLMN     | 0.114744 | 0.019582 | 0.672376 | 0.016396 |
| YIF1A    | 1.041531 | 0.524287 | 2.069068 | 0.907502 |
| CNIH2    | 51.15503 | 1.002128 | 2611.28  | 0.049876 |
| NLRP6    | 0.345065 | 0.018564 | 6.413989 | 0.475486 |
| NDUFA11  | 2.095282 | 1.041536 | 4.215126 | 0.038072 |
| RSRC1    | 0.478777 | 0.208411 | 1.099884 | 0.082632 |
| RAB1B    | 2.699246 | 1.269829 | 5.737725 | 0.009856 |
| PTDSS2   | 1.345229 | 0.676523 | 2.674915 | 0.397752 |
| SEZ6L2   | 1.999595 | 0.57015  | 7.012854 | 0.279092 |
| ASPHD1   | 5.231047 | 0.122001 | 224.2919 | 0.388206 |
| KCTD13   | 1.127105 | 0.521142 | 2.437657 | 0.761114 |
| P2RY14   | 1.708088 | 0.882844 | 3.304736 | 0.111854 |
| AMZ1     | 0.231607 | 0.014537 | 3.689981 | 0.300392 |
| GPR171   | 1.945712 | 0.18136  | 20.87446 | 0.58246  |
| FUT1     | 0.398017 | 0.06504  | 2.435708 | 0.318879 |
| DHX36    | 0.430424 | 0.175851 | 1.053529 | 0.064923 |
| FBXW8    | 0.061516 | 0.003145 | 1.203186 | 0.066057 |
| KLC2     | 25.86324 | 0.593658 | 1126.754 | 0.091186 |
| SLC22A1  | 0.055743 | 0.00341  | 0.911274 | 0.042853 |
| CTBP2    | 0.247553 | 0.024837 | 2.467361 | 0.234008 |
| CHST2    | 1.674787 | 0.916673 | 3.05988  | 0.093538 |
| ZDHHC14  | 1.067085 | 0.59826  | 1.903302 | 0.825931 |
| ATR      | 1.368947 | 0.025566 | 73.30219 | 0.877113 |
| UBE2C    | 0.754027 | 0.43397  | 1.310128 | 0.316524 |
| GK5      | 0.504119 | 0.236396 | 1.075042 | 0.07628  |
| VCPIP1   | 1.350089 | 0.556391 | 3.276009 | 0.506895 |
| DES      | 0.305731 | 0.03199  | 2.921877 | 0.303497 |
| PDIK1L   | 0.548201 | 0.283522 | 1.059966 | 0.073962 |
| RAG2     | 0.064884 | 0.003702 | 1.137115 | 0.061204 |
| TRAF6    | 0.311339 | 0.064672 | 1.498823 | 0.145595 |
| ZNF654   | 1.223628 | 0.37968  | 3.943492 | 0.735352 |
| MRPS22   | 0.57073  | 0.206529 | 1.577175 | 0.279515 |
| PACS1    | 2.294847 | 1.262197 | 4.172344 | 0.006462 |
| WFDC5    | 44.94171 | 1.787601 | 1129.871 | 0.02072  |
| MARCKSL1 | 0.944639 | 0.700911 | 1.273119 | 0.708367 |
| SH3BP5L  | 1.378371 | 0.655242 | 2.899548 | 0.397683 |
| YPEL2    | 1.360571 | 0.822741 | 2.249983 | 0.230248 |
| ABO      | 0.644079 | 0.151172 | 2.744136 | 0.551907 |
| PSMD2    | 0.610135 | 0.16684  | 2.23127  | 0.455168 |
| FAM131A  | 1.516585 | 0.624465 | 3.683199 | 0.357624 |
| CSRP2    | 0.659852 | 0.350976 | 1.240552 | 0.196796 |
| INHBC    | 7.112774 | 0.723272 | 69.94821 | 0.092533 |
| PARL     | 0.469311 | 0.166254 | 1.324796 | 0.153073 |
| DDIT3    | 0.912493 | 0.659652 | 1.262248 | 0.580154 |
| PCCA     | 2.026419 | 1.249023 | 3.287668 | 0.004229 |
| DCTN2    | 2.237375 | 0.495573 | 10.10112 | 0.295045 |
| NPPA     | 1.004253 | 0.105266 | 9.580722 | 0.997058 |
| ZNF408   | 1.100227 | 0.365694 | 3.31014  | 0.86504  |

|          |          |          |          |          |
|----------|----------|----------|----------|----------|
| CTDSP2   | 1.878533 | 0.875059 | 4.032741 | 0.105759 |
| CKAP5    | 0.611388 | 0.220904 | 1.692114 | 0.343488 |
| ARHGAP1  | 1.557031 | 0.745991 | 3.249828 | 0.238236 |
| MED16    | 1.123506 | 0.598922 | 2.107566 | 0.716734 |
| GOLGA8A  | 0.90166  | 0.446879 | 1.819266 | 0.772552 |
| TP53I11  | 2.630306 | 1.021204 | 6.774853 | 0.045131 |
| DOLK     | 3.126893 | 1.620166 | 6.03485  | 0.000678 |
| PHYHD1   | 3.340187 | 0.641007 | 17.4052  | 0.15216  |
| CATSPER1 | 0.862232 | 0.554395 | 1.341001 | 0.51065  |
| CCNE2    | 0.509004 | 0.160511 | 1.614124 | 0.251446 |
| CST6     | 0.179386 | 0.001447 | 22.24181 | 0.484769 |
| ZNF519   | 0.344384 | 0.051177 | 2.31744  | 0.273116 |
| LSM1     | 0.264623 | 0.069548 | 1.006858 | 0.051183 |
| BANF1    | 1.370182 | 0.524124 | 3.58197  | 0.520647 |
| APOF     | 0.252446 | 0.046775 | 1.362448 | 0.109512 |
| TMEM9B   | 0.989306 | 0.385523 | 2.538695 | 0.98216  |
| NRIP3    | 0.717113 | 0.404614 | 1.270967 | 0.25479  |
| PTPN2    | 0.949001 | 0.183185 | 4.916353 | 0.950267 |
| EIF1AD   | 0.555979 | 0.151269 | 2.043465 | 0.37675  |
| SMAD2    | 0.645007 | 0.034192 | 12.16766 | 0.769832 |
| EIF3F    | 1.260968 | 0.447328 | 3.554528 | 0.660996 |
| ZNF25    | 0.74632  | 0.407562 | 1.366648 | 0.343144 |
| ARL10    | 0.016713 | 0.000467 | 0.598134 | 0.024992 |
| CLTB     | 2.366264 | 0.687339 | 8.146199 | 0.172082 |
| LPL      | 0.80725  | 0.514465 | 1.26666  | 0.351565 |
| RFESD    | 0.873422 | 0.608817 | 1.253031 | 0.462355 |
| CCDC14   | 0.68804  | 0.445898 | 1.061676 | 0.091117 |
| TBC1D10C | 0.948735 | 0.512242 | 1.757175 | 0.867093 |
| SART1    | 0.160307 | 0.021319 | 1.205418 | 0.075328 |
| PPP2R2D  | 0.147716 | 0.040494 | 0.538845 | 0.003775 |
| MCTP1    | 1.704    | 0.614853 | 4.722457 | 0.305463 |
| POLD4    | 1.997934 | 0.966891 | 4.128429 | 0.061617 |
| OR52W1   | 0.179786 | 0.016247 | 1.98944  | 0.161775 |
| LRRC25   | 1.303104 | 1.005697 | 1.688462 | 0.045184 |
| DPP10    | 1.501749 | 0.252269 | 8.939864 | 0.655044 |
| CLCF1    | 1.117446 | 0.599435 | 2.083105 | 0.726748 |
| TSGA10IP | 1.892969 | 0.143658 | 24.94354 | 0.627625 |
| GPR152   | 0.096757 | 0.005262 | 1.779256 | 0.115924 |
| UBQLNL   | 0.269677 | 0.096421 | 0.754253 | 0.01251  |
| KCNE3    | 1.99701  | 0.304497 | 13.09718 | 0.471043 |
| CABP4    | 1.728134 | 0.583102 | 5.12165  | 0.323701 |
| ALG10B   | 0.988253 | 0.209029 | 4.672293 | 0.988106 |
| DRAP1    | 1.601917 | 0.816047 | 3.144596 | 0.170922 |
| LONRF3   | 1.440103 | 0.482052 | 4.302227 | 0.513655 |
| UCP3     | 0.004069 | 0.000149 | 0.110787 | 0.001095 |
| UCP2     | 1.411264 | 0.952273 | 2.091487 | 0.086105 |
| PAAF1    | 0.631871 | 0.355827 | 1.122066 | 0.117146 |
| MRPL48   | 0.652821 | 0.324681 | 1.312596 | 0.231432 |
| RAB6A    | 1.070878 | 0.504794 | 2.271779 | 0.858362 |
| P2RY2    | 1.048426 | 0.496451 | 2.21411  | 0.901326 |
| FOSL1    | 1.465962 | 0.696548 | 3.085277 | 0.313696 |
| ERCC4    | 0.063748 | 0.003042 | 1.335703 | 0.076149 |
| CCDC85B  | 1.377576 | 0.742167 | 2.556991 | 0.310073 |
| TMEM70   | 1.221762 | 0.662479 | 2.253209 | 0.52127  |
| RPS6KB2  | 1.368545 | 0.567129 | 3.302447 | 0.485138 |
| TOM1L2   | 0.870636 | 0.127016 | 5.967805 | 0.887827 |
| ZNF77    | 0.899795 | 0.345835 | 2.341089 | 0.828654 |
| B3GNTL1  | 0.556052 | 0.32619  | 0.947895 | 0.031037 |

|          |          |          |          |          |
|----------|----------|----------|----------|----------|
| MLXIP    | 0.167439 | 0.013347 | 2.100537 | 0.166101 |
| AURKAIP1 | 2.317068 | 0.955801 | 5.617069 | 0.062899 |
| TTLL11   | 1.961287 | 0.248673 | 15.46869 | 0.522647 |
| TOMM5    | 1.261664 | 0.666796 | 2.387232 | 0.474997 |
| SLC35E3  | 0.881826 | 0.45324  | 1.715682 | 0.71113  |
| ZNF169   | 0.11041  | 0.018124 | 0.67261  | 0.016842 |
| RUVBL1   | 0.791227 | 0.294895 | 2.122927 | 0.641912 |
| SFN      | 0.24355  | 0.01538  | 3.856786 | 0.316252 |
| MSRA     | 0.314006 | 0.13761  | 0.716516 | 0.005925 |
| ETV4     | 0.543076 | 0.023608 | 12.49264 | 0.702756 |
| GAPT     | 0.960394 | 0.639212 | 1.442957 | 0.845738 |
| BAIAP2   | 9.405497 | 2.79602  | 31.63903 | 0.000293 |
| ZDHHC21  | 0.15319  | 0.022716 | 1.033087 | 0.054037 |
| PLEKHF2  | 0.881334 | 0.276449 | 2.809737 | 0.830907 |
| A2M      | 1.596414 | 0.622025 | 4.097164 | 0.330708 |
| ARL4D    | 4.96489  | 0.757288 | 32.55056 | 0.094882 |
| DOK7     | 0.292282 | 0.038967 | 2.192336 | 0.231526 |
| LRRN1    | 2.312485 | 0.729265 | 7.332843 | 0.154515 |
| UBE2O    | 1.417638 | 0.867035 | 2.317897 | 0.164163 |
| ORAI3    | 0.828149 | 0.475625 | 1.441957 | 0.505139 |
| UNC119B  | 0.890746 | 0.408876 | 1.940513 | 0.770881 |
| DENND2C  | 0.609459 | 0.060375 | 6.152263 | 0.674643 |
| ASCL3    | 3.924359 | 0.481585 | 31.97895 | 0.201487 |
| TUBB6    | 1.44085  | 1.069468 | 1.941197 | 0.016324 |
| LYSMD3   | 1.39875  | 0.439375 | 4.452921 | 0.570041 |
| B3GALT6  | 1.605708 | 0.800689 | 3.220099 | 0.182247 |
| ZNF613   | 2.220495 | 0.449907 | 10.95915 | 0.327393 |
| JAKMIP2  | 0.744282 | 0.30704  | 1.804181 | 0.513281 |
| MBLAC2   | 0.560078 | 0.255216 | 1.229104 | 0.148304 |
| ZNF683   | 1.103059 | 0.627448 | 1.939186 | 0.733289 |
| SLC35A4  | 2.017211 | 1.012335 | 4.019561 | 0.046063 |
| IP6K1    | 2.948393 | 1.397106 | 6.222163 | 0.004546 |
| SSNA1    | 1.937658 | 1.006083 | 3.731821 | 0.047918 |
| CSTF3    | 0.311039 | 0.150734 | 0.641824 | 0.001579 |
| YES1     | 0.937287 | 0.510685 | 1.720252 | 0.834414 |
| CHMP6    | 1.14529  | 0.569968 | 2.301336 | 0.703193 |
| DLEU1    | 0.346231 | 0.165839 | 0.722844 | 0.00474  |
| UFSP1    | 2.664262 | 0.708477 | 10.01909 | 0.147058 |
| TMEM39A  | 1.005167 | 0.472777 | 2.137077 | 0.989315 |
| TCP11L1  | 0.484524 | 0.059348 | 3.955743 | 0.49882  |
| GPX2     | 1.34011  | 0.074537 | 24.09413 | 0.84258  |
| CCDC57   | 0.159027 | 0.029436 | 0.859146 | 0.03265  |
| HSF5     | 1.325124 | 0.15717  | 11.1723  | 0.79579  |
| SPHK1    | 1.997978 | 0.775734 | 5.145986 | 0.151608 |
| BNIP3    | 0.812562 | 0.477617 | 1.382398 | 0.443927 |
| MYPOP    | 1.812348 | 0.856898 | 3.833132 | 0.119739 |
| ATAD5    | 8.23105  | 0.67265  | 100.7212 | 0.099016 |
| ZNF404   | 0.717925 | 0.23952  | 2.151872 | 0.554059 |
| RTTN     | 0.27328  | 0.120304 | 0.620778 | 0.001942 |
| ACBD7    | 0.688537 | 0.05209  | 9.101214 | 0.776928 |
| ANAPC2   | 2.33058  | 0.603906 | 8.994118 | 0.219447 |
| ZBTB8OS  | 0.614506 | 0.132606 | 2.847662 | 0.533692 |
| ZNF135   | 1.294053 | 0.706984 | 2.368616 | 0.403291 |
| COX8A    | 2.077189 | 0.978786 | 4.408231 | 0.056896 |
| TAC4     | 1.601153 | 0.943624 | 2.716857 | 0.081008 |
| ZSCAN2   | 0.536626 | 0.195062 | 1.476289 | 0.227996 |
| B3GNT4   | 2.7104   | 0.213137 | 34.46728 | 0.44218  |
| CDC26    | 0.192791 | 0.068458 | 0.54294  | 0.001833 |

|          |          |          |          |          |
|----------|----------|----------|----------|----------|
| HSD11B2  | 0.22511  | 0.015195 | 3.334914 | 0.278269 |
| CRLF3    | 0.753611 | 0.308314 | 1.842051 | 0.535035 |
| RNPEP    | 0.780667 | 0.448472 | 1.358929 | 0.381295 |
| EID2     | 0.574458 | 0.231528 | 1.425325 | 0.231858 |
| EID2B    | 1.267135 | 0.605223 | 2.652956 | 0.530005 |
| KCMF1    | 0.207156 | 0.003798 | 11.2983  | 0.440357 |
| DNAJC30  | 0.825078 | 0.278652 | 2.443019 | 0.728464 |
| SPRYD4   | 0.761239 | 0.356052 | 1.62753  | 0.481643 |
| VPS37D   | 1.436755 | 0.391982 | 5.26623  | 0.58451  |
| CLEC14A  | 0.965863 | 0.654033 | 1.426367 | 0.861383 |
| CLK2     | 0.313204 | 0.066851 | 1.4674   | 0.140675 |
| LPCAT4   | 2.20233  | 0.735587 | 6.593723 | 0.158213 |
| SLCO3A1  | 3.530171 | 0.921209 | 13.52799 | 0.065734 |
| ZNF575   | 5.490207 | 1.039463 | 28.99803 | 0.044905 |
| WDR25    | 2.896682 | 1.012975 | 8.283294 | 0.047254 |
| DIRAS1   | 0.622259 | 0.101351 | 3.820453 | 0.608403 |
| PHLDB3   | 2.624275 | 0.436575 | 15.77466 | 0.291748 |
| PRR15    | 10.30861 | 0.666147 | 159.5254 | 0.09506  |
| GNG7     | 0.843123 | 0.614322 | 1.157139 | 0.290779 |
| CNTD1    | 0.181837 | 0.010347 | 3.195609 | 0.243784 |
| KBTBD11  | 1.149375 | 0.844281 | 1.564721 | 0.376417 |
| B3GNT5   | 1.014942 | 0.588108 | 1.751563 | 0.957515 |
| LMNB2    | 0.694512 | 0.348597 | 1.383681 | 0.299939 |
| MEX3C    | 0.80801  | 0.442363 | 1.475895 | 0.487964 |
| RNF152   | 2.646043 | 0.112945 | 61.99084 | 0.545379 |
| MYO1D    | 0.959232 | 0.304015 | 3.026586 | 0.943402 |
| FOXL1    | 2.523209 | 0.269861 | 23.59207 | 0.417079 |
| LRRC37A  | 0.802183 | 0.205272 | 3.134857 | 0.751276 |
| FOXC2    | 1.077255 | 0.554496 | 2.092852 | 0.826166 |
| CCDC121  | 3.712421 | 0.735467 | 18.7392  | 0.112288 |
| ACSF3    | 1.267061 | 0.868634 | 1.848242 | 0.219137 |
| BOK      | 1.463473 | 0.865451 | 2.474725 | 0.15537  |
| ZNF843   | 1.043094 | 0.256174 | 4.247283 | 0.953036 |
| TTY14    | 0.650113 | 0.251258 | 1.682125 | 0.374662 |
| PFN4     | 2.035732 | 0.383792 | 10.79804 | 0.403702 |
| CDK5R1   | 0.788467 | 0.164829 | 3.77166  | 0.766    |
| ZNF285B  | 1.655944 | 0.059103 | 46.39627 | 0.766766 |
| RUFY1    | 0.78422  | 0.162065 | 3.794774 | 0.762536 |
| BASP1    | 1.188628 | 1.011442 | 1.396853 | 0.035896 |
| LRRC37A3 | 1.647227 | 0.180041 | 15.07075 | 0.658565 |
| IRX5     | 1.033188 | 0.769637 | 1.386988 | 0.827977 |
| METRNL   | 1.619569 | 1.155128 | 2.270747 | 0.005169 |
| FAM91A1  | 0.739896 | 0.234488 | 2.334642 | 0.60738  |
| WSB2     | 1.524167 | 0.896693 | 2.590725 | 0.119448 |
| SOX11    | 1.071868 | 0.046518 | 24.69791 | 0.965416 |
| TYMS     | 0.600291 | 0.422009 | 0.853889 | 0.004533 |
| PXMP2    | 0.831586 | 0.357786 | 1.93282  | 0.668235 |
| TCEANC   | 2.21283  | 0.300914 | 16.2725  | 0.435248 |
| PNMA1    | 1.197523 | 0.644775 | 2.224128 | 0.568238 |
| ANKLE2   | 0.469942 | 0.236442 | 0.934038 | 0.031188 |
| C8G      | 0.858008 | 0.098715 | 7.457613 | 0.889603 |
| FUT2     | 1.221377 | 0.134493 | 11.09177 | 0.858992 |
| EFCAB5   | 10.98055 | 0.111281 | 1083.491 | 0.306422 |
| GCNT4    | 4.048046 | 0.277131 | 59.12979 | 0.306782 |
| MUC20    | 0.577698 | 0.112644 | 2.962735 | 0.510644 |
| THAP4    | 1.190121 | 0.361361 | 3.91959  | 0.774718 |
| NFATC2IP | 1.151827 | 0.187305 | 7.083141 | 0.878774 |
| FAM89B   | 1.591284 | 0.82223  | 3.079657 | 0.167912 |



|          |          |          |          |          |
|----------|----------|----------|----------|----------|
| SHMT1    | 0.123686 | 0.026898 | 0.568752 | 0.007255 |
| DPP7     | 1.852956 | 1.037023 | 3.310865 | 0.037276 |
| SEC24C   | 5.197199 | 0.920068 | 29.35747 | 0.062089 |
| SMCR8    | 0.593167 | 0.053774 | 6.54311  | 0.669818 |
| MTHFR    | 1.494125 | 0.723483 | 3.08564  | 0.277834 |
| DEAF1    | 1.613312 | 0.421615 | 6.173341 | 0.484829 |
| MTX3     | 1.051183 | 0.58294  | 1.89554  | 0.868206 |
| TMEM80   | 7.503637 | 1.280285 | 43.97815 | 0.025494 |
| FBXO46   | 1.842743 | 0.72499  | 4.68379  | 0.199046 |
| ZDHHC13  | 0.528812 | 0.151294 | 1.848339 | 0.318346 |
| SLC38A9  | 0.674941 | 0.246205 | 1.850266 | 0.444834 |
| ACER2    | 1.108765 | 0.252841 | 4.862186 | 0.891115 |
| WDR73    | 0.385898 | 0.162617 | 0.915756 | 0.030807 |
| POLE     | 0.587365 | 0.38471  | 0.896775 | 0.013717 |
| SCN4B    | 1.214878 | 0.158069 | 9.337266 | 0.85161  |
| RHOG     | 1.239465 | 0.685257 | 2.241894 | 0.477715 |
| EPS8L2   | 0.260911 | 0.012453 | 5.466489 | 0.386706 |
| ANO6     | 1.000625 | 0.581782 | 1.721006 | 0.998197 |
| ZBTB34   | 0.571677 | 0.11664  | 2.801907 | 0.490498 |
| TALDO1   | 0.741444 | 0.149094 | 3.687195 | 0.714709 |
| ULK1     | 1.06567  | 0.336055 | 3.379363 | 0.913983 |
| RPS6KA3  | 0.455009 | 0.117894 | 1.756093 | 0.253132 |
| B3GNT8   | 1.913313 | 1.218844 | 3.003475 | 0.0048   |
| PUS1     | 0.528038 | 0.151773 | 1.837117 | 0.315442 |
| CHD9     | 0.607352 | 0.362385 | 1.017915 | 0.058415 |
| TRIM72   | 0.608138 | 0.086902 | 4.25572  | 0.616357 |
| MAN1B1   | 1.587886 | 0.670378 | 3.761134 | 0.293259 |
| KCNA3    | 0.27469  | 0.032073 | 2.352585 | 0.238317 |
| FZD8     | 2.164845 | 0.50126  | 9.349551 | 0.300799 |
| FBXO39   | 1.568009 | 0.093557 | 26.27966 | 0.75448  |
| TOP3A    | 0.614955 | 0.215813 | 1.752306 | 0.362798 |
| CASKIN2  | 1.358787 | 0.217243 | 8.498784 | 0.743086 |
| ZBTB38   | 4.583272 | 0.898749 | 23.37291 | 0.06702  |
| FLJ13224 | 0.670594 | 0.041163 | 10.92464 | 0.778979 |
| RPL13AP3 | 3.652577 | 0.207732 | 64.22359 | 0.375825 |
| CCDC71   | 1.919786 | 1.18335  | 3.11453  | 0.008245 |
| LRRN4CL  | 2.200996 | 0.038798 | 124.8627 | 0.7018   |
| FLJ40194 | 1.639948 | 0.121689 | 22.10084 | 0.709329 |
| TIMM22   | 0.734943 | 0.385852 | 1.399865 | 0.348878 |
| HIC1     | 2.592015 | 0.79361  | 8.465799 | 0.114756 |
| PPFIA3   | 0.846432 | 0.121188 | 5.911891 | 0.866488 |
| MAGEF1   | 0.646483 | 0.272377 | 1.534419 | 0.322606 |
| UMODL1   | 0.983229 | 0.734702 | 1.315824 | 0.909419 |
| SAMD9L   | 0.991855 | 0.593028 | 1.658903 | 0.975137 |
| PAWR     | 1.070085 | 0.419142 | 2.731969 | 0.887358 |
| TGIF1    | 0.789753 | 0.16823  | 3.707474 | 0.764816 |
| NAP1L5   | 0.681885 | 0.326233 | 1.42526  | 0.308717 |
| CD19     | 1.306154 | 0.865884 | 1.970287 | 0.202879 |
| OR2T8    | 0.355839 | 0.069157 | 1.830936 | 0.216348 |
| NR2C2    | 0.439186 | 0.156713 | 1.230809 | 0.117587 |
| ACOT4    | 1.630918 | 1.067214 | 2.492369 | 0.023784 |
| ARIH2    | 0.321262 | 0.140376 | 0.735234 | 0.007187 |
| RBM44    | 0.057104 | 0.004747 | 0.686879 | 0.024075 |
| ZBTB33   | 0.895477 | 0.496553 | 1.614891 | 0.713656 |
| ZBED2    | 0.291905 | 0.02453  | 3.473587 | 0.329809 |
| IRX3     | 1.046417 | 0.918977 | 1.191531 | 0.493495 |
| OR2B11   | 0.102138 | 0.006013 | 1.735031 | 0.114411 |
| SLC25A22 | 0.438411 | 0.207482 | 0.926363 | 0.030745 |

|         |          |          |          |          |
|---------|----------|----------|----------|----------|
| RABEP2  | 1.075481 | 0.197693 | 5.850795 | 0.932895 |
| ATOX1   | 1.34316  | 0.537696 | 3.355199 | 0.527636 |
| TBL1XR1 | 0.873677 | 0.447714 | 1.704909 | 0.692178 |
| CD163   | 1.353461 | 1.060952 | 1.726614 | 0.014842 |
| ZNF491  | 0.223528 | 0.016807 | 2.972938 | 0.256483 |
| RPLP2   | 7.937762 | 0.810827 | 77.70837 | 0.075108 |
| JUN     | 1.068183 | 0.880182 | 1.296341 | 0.504257 |
| CSTF2T  | 0.886207 | 0.399463 | 1.966043 | 0.766356 |
| GBA     | 1.043773 | 0.527828 | 2.064046 | 0.901987 |
| ACAD9   | 0.264258 | 0.116377 | 0.600053 | 0.00147  |
| IL17RA  | 1.198514 | 0.840318 | 1.709396 | 0.317505 |
| PNPLA2  | 1.79287  | 1.028106 | 3.126507 | 0.039623 |
| MBOAT4  | 0.085189 | 0.005111 | 1.41982  | 0.086205 |
| AGTRAP  | 1.117387 | 0.841199 | 1.484254 | 0.443553 |
| CD163L1 | 0.718722 | 0.139538 | 3.701929 | 0.692897 |
| THAP5   | 5.654582 | 0.418919 | 76.32568 | 0.191991 |
| SUMO4   | 1.557018 | 0.284298 | 8.52735  | 0.609821 |
| DNAJC28 | 1.413531 | 0.028951 | 69.01634 | 0.861508 |
| NAALADL | 0.751665 | 0.041817 | 13.51109 | 0.846436 |
| CD151   | 2.003087 | 1.03723  | 3.868336 | 0.038563 |
| POLR2L  | 1.267792 | 0.425113 | 3.780872 | 0.670392 |
| FAM20C  | 2.18333  | 1.077808 | 4.422802 | 0.030159 |
| FLII    | 1.567012 | 0.753911 | 3.257055 | 0.228881 |
| SOX12   | 0.319315 | 0.077891 | 1.309028 | 0.112768 |
| HNRNPA0 | 0.656157 | 0.409141 | 1.052308 | 0.080395 |
| FAM87B  | 0.178947 | 0.016822 | 1.903565 | 0.153769 |
| CHID1   | 0.568555 | 0.059598 | 5.423897 | 0.623655 |
| ZNF620  | 0.257607 | 0.024028 | 2.7618   | 0.26245  |
| ZNF518A | 0.797632 | 0.381134 | 1.669273 | 0.548446 |
| TMEM187 | 1.440098 | 0.670738 | 3.091941 | 0.349519 |
| ZNF619  | 7.407858 | 1.017026 | 53.9577  | 0.048084 |
| AP3S1   | 1.000065 | 0.491577 | 2.034536 | 0.999857 |
| GRB2    | 2.285163 | 1.062313 | 4.915658 | 0.034461 |
| ZBTB41  | 0.335471 | 0.048842 | 2.304192 | 0.266597 |
| UBE2N   | 0.821256 | 0.376908 | 1.789458 | 0.620206 |
| ARL6IP6 | 0.636741 | 0.172641 | 2.348458 | 0.497859 |
| ZNF354C | 0.593856 | 0.027765 | 12.70189 | 0.73878  |
| MAMDC4  | 0.275431 | 0.082853 | 0.915628 | 0.035398 |
| CENPBD1 | 2.171593 | 0.87857  | 5.367605 | 0.093041 |
| ODF3    | 0.678584 | 0.07713  | 5.970165 | 0.726723 |
| BET1L   | 2.831454 | 0.730954 | 10.96804 | 0.131974 |
| RPS27   | 1.263606 | 0.172523 | 9.254981 | 0.817859 |
| RIC8A   | 1.52466  | 0.539443 | 4.309233 | 0.426244 |
| IMP3    | 1.384267 | 0.650087 | 2.947598 | 0.399105 |
| ASB8    | 0.596751 | 0.243982 | 1.459579 | 0.257927 |
| ODF3B   | 2.157276 | 1.23198  | 3.777528 | 0.007149 |
| DPY19L2 | 0.511469 | 0.301398 | 0.867957 | 0.012963 |
| GPR150  | 0.150161 | 0.014009 | 1.609517 | 0.117185 |
| TSPYL6  | 0.254143 | 0.057392 | 1.1254   | 0.071176 |
| DMAP1   | 0.7031   | 0.29569  | 1.671849 | 0.425411 |
| IMPDH2  | 0.810108 | 0.52964  | 1.239097 | 0.331434 |
| ALS2CL  | 0.516149 | 0.005108 | 52.15954 | 0.778837 |
| MLF1    | 1.962136 | 0.340965 | 11.29141 | 0.450309 |
| NDUFAF3 | 0.302798 | 0.084369 | 1.086733 | 0.066893 |
| GRAMD1C | 0.755873 | 0.108906 | 5.246195 | 0.777067 |
| STAP2   | 0.996822 | 0.045422 | 21.87604 | 0.998388 |
| TSSK6   | 8.312317 | 1.592252 | 43.39427 | 0.012018 |
| BOLA1   | 2.011015 | 0.694619 | 5.822158 | 0.197705 |

|          |          |          |          |          |
|----------|----------|----------|----------|----------|
| PDE4DIP  | 47.80287 | 0.702357 | 3253.492 | 0.072513 |
| DDX10    | 0.363484 | 0.172132 | 0.767553 | 0.007963 |
| NDUFV2   | 1.209943 | 0.452548 | 3.234932 | 0.704088 |
| DALRD3   | 3.166344 | 0.536828 | 18.67589 | 0.203043 |
| ZNF114   | 1.818247 | 0.180996 | 18.26574 | 0.611522 |
| ZNF518B  | 1.582815 | 0.806254 | 3.107337 | 0.182126 |
| LCORL    | 0.475585 | 0.011918 | 18.97755 | 0.692741 |
| PARD6G   | 0.11136  | 0.010324 | 1.201161 | 0.070464 |
| SH2B1    | 0.997161 | 0.377253 | 2.635716 | 0.995426 |
| ZC3H12D  | 4.688972 | 0.308443 | 71.28209 | 0.26577  |
| VN1R1    | 0.083794 | 0.018264 | 0.384443 | 0.001423 |
| SH2D4B   | 0.05088  | 0.00097  | 2.668352 | 0.140436 |
| RNF212   | 0.548041 | 0.101166 | 2.968867 | 0.485399 |
| PRSS36   | 1.788297 | 0.420166 | 7.611299 | 0.431529 |
| ZNF543   | 1.479092 | 0.527972 | 4.143614 | 0.456429 |
| GALNT11  | 0.818094 | 0.472426 | 1.416683 | 0.473581 |
| WDR6     | 0.807893 | 0.441353 | 1.478844 | 0.489211 |
| GEN1     | 0.134562 | 0.00617  | 2.934803 | 0.202179 |
| TMPRSS9  | 1.125752 | 0.750303 | 1.689075 | 0.567183 |
| AQP11    | 0.222292 | 0.02793  | 1.769206 | 0.155352 |
| TMEM11   | 1.534472 | 0.657622 | 3.580484 | 0.321949 |
| ZNF354B  | 3.309837 | 0.541077 | 20.24669 | 0.195222 |
| KCNG2    | 1.303875 | 0.094817 | 17.9302  | 0.842726 |
| ZFAND2A  | 0.693346 | 0.406564 | 1.182419 | 0.17872  |
| PLEKHM3  | 0.015844 | 0.000777 | 0.323067 | 0.00705  |
| ZNF223   | 0.965219 | 0.534596 | 1.742711 | 0.906517 |
| BEND3    | 0.326583 | 0.028215 | 3.780181 | 0.370433 |
| NT5DC1   | 0.661127 | 0.250744 | 1.743168 | 0.402843 |
| GLDC     | 2.48511  | 0.827548 | 7.462731 | 0.104681 |
| TUBAL3   | 0.152696 | 0.027358 | 0.852257 | 0.032178 |
| P4HTM    | 0.9425   | 0.451359 | 1.968069 | 0.874738 |
| DTX3     | 1.469675 | 0.808546 | 2.671395 | 0.206619 |
| KLHL11   | 1.172896 | 0.206901 | 6.649011 | 0.857031 |
| CTXN1    | 1.126214 | 0.841846 | 1.506638 | 0.423414 |
| SLC25A20 | 0.345336 | 0.1098   | 1.086127 | 0.068965 |
| CA8      | 0.744361 | 0.340244 | 1.628456 | 0.459826 |
| CD28     | 1.235605 | 0.414222 | 3.685756 | 0.704391 |
| EPM2AIP1 | 0.52832  | 0.280479 | 0.995162 | 0.048271 |
| MAF      | 1.309499 | 0.721995 | 2.375068 | 0.374726 |
| CTNNBIP1 | 0.500594 | 0.153919 | 1.628095 | 0.250165 |
| GTPBP6   | 0.670863 | 0.291088 | 1.546121 | 0.348721 |
| ERN1     | 0.6668   | 0.306411 | 1.451064 | 0.307002 |
| GPR35    | 1.747029 | 1.016437 | 3.002751 | 0.043491 |
| ZNF713   | 1.122372 | 0.085195 | 14.78636 | 0.930068 |
| PARP10   | 1.907066 | 0.74595  | 4.875528 | 0.177669 |
| SUZ12    | 0.526834 | 0.304113 | 0.91267  | 0.02226  |
| NSUN3    | 1.071393 | 0.355539 | 3.228574 | 0.90248  |
| KCTD12   | 1.425544 | 1.047308 | 1.94038  | 0.024209 |
| RPP25    | 1.385868 | 0.757297 | 2.536163 | 0.289896 |
| GRINA    | 2.042915 | 1.299604 | 3.211363 | 0.001965 |
| THBD     | 2.749014 | 0.971683 | 7.777306 | 0.056673 |
| GP5      | 2.492503 | 0.225121 | 27.59654 | 0.456591 |
| COX5A    | 0.430019 | 0.160255 | 1.153892 | 0.09379  |
| STX19    | 0.352156 | 0.035696 | 3.474195 | 0.371516 |
| ZHX2     | 1.072118 | 0.576728 | 1.993034 | 0.82577  |
| CPNE7    | 27.54564 | 1.703944 | 445.2976 | 0.019527 |
| CD300LB  | 1.388785 | 0.962243 | 2.004404 | 0.079367 |
| MPI      | 0.726972 | 0.300748 | 1.757245 | 0.478891 |

|          |          |          |          |          |
|----------|----------|----------|----------|----------|
| TRIM73   | 0.534095 | 0.020805 | 13.71076 | 0.704857 |
| OPLAH    | 1.540735 | 0.918379 | 2.584842 | 0.101541 |
| TMEM52   | 0.271098 | 0.027885 | 2.635645 | 0.260666 |
| MSC      | 1.223047 | 0.739827 | 2.021882 | 0.432428 |
| APOLD1   | 1.969365 | 0.592922 | 6.541166 | 0.268495 |
| EXOSC4   | 1.200391 | 0.741711 | 1.942723 | 0.457143 |
| DPY19L3  | 0.380604 | 0.136424 | 1.061836 | 0.064987 |
| TAF7     | 1.016356 | 0.589655 | 1.75184  | 0.953425 |
| PFAS     | 0.554939 | 0.310046 | 0.993265 | 0.047399 |
| ZNF552   | 0.367274 | 0.042899 | 3.14436  | 0.36057  |
| GAK      | 0.508972 | 0.028404 | 9.120301 | 0.646465 |
| ZBTB7A   | 2.677087 | 0.65624  | 10.92101 | 0.169829 |
| TUFM     | 1.466511 | 0.789354 | 2.724577 | 0.225699 |
| RMI1     | 0.983533 | 0.373759 | 2.588133 | 0.973169 |
| FBXO34   | 1.145915 | 0.658661 | 1.993623 | 0.629745 |
| EIF3K    | 1.833579 | 0.45642  | 7.366039 | 0.392832 |
| MRFAP1L1 | 2.518838 | 0.606169 | 10.46663 | 0.203677 |
| SNX18    | 1.135476 | 0.167234 | 7.70958  | 0.896561 |
| AURKB    | 0.856828 | 0.583399 | 1.258409 | 0.430745 |
| MRFAP1   | 0.81007  | 0.315934 | 2.077058 | 0.661063 |
| TMEM107  | 1.034742 | 0.609018 | 1.758062 | 0.899509 |
| RRS1     | 0.630766 | 0.280094 | 1.420473 | 0.265896 |
| RCC2     | 0.246899 | 0.096822 | 0.629604 | 0.003404 |
| OR13D1   | 0.779664 | 0.053081 | 11.45191 | 0.85594  |
| IGSF22   | 6.315252 | 0.724876 | 55.01962 | 0.095188 |
| DPM3     | 1.374183 | 0.80567  | 2.34386  | 0.243298 |
| CYC1     | 0.904372 | 0.386835 | 2.114308 | 0.816556 |
| PER1     | 0.947769 | 0.533767 | 1.68288  | 0.854701 |
| HTR1F    | 1.182309 | 0.67258  | 2.078348 | 0.560656 |
| TMTC2    | 3.544157 | 1.601065 | 7.845431 | 0.001803 |
| FARSA    | 0.708053 | 0.424102 | 1.18212  | 0.186776 |
| SPTY2D1  | 0.644542 | 0.308854 | 1.345084 | 0.24194  |
| SAMD4B   | 1.190671 | 0.372936 | 3.801447 | 0.768263 |
| GIMAP7   | 1.64572  | 1.143438 | 2.368643 | 0.007331 |
| EDC3     | 0.731103 | 0.300777 | 1.777102 | 0.489475 |
| FUCA1    | 1.581242 | 0.968616 | 2.58134  | 0.066885 |
| PXT1     | 8.857596 | 0.565009 | 138.8598 | 0.12033  |
| GGN      | 0.026696 | 0.000759 | 0.938893 | 0.046078 |
| ZNF664   | 0.20429  | 0.063964 | 0.652465 | 0.007347 |
| CALR     | 0.709289 | 0.369131 | 1.362905 | 0.302631 |
| MAGED1   | 1.124268 | 0.574502 | 2.200129 | 0.732394 |
| LDLRAD3  | 1.117397 | 0.634758 | 1.96701  | 0.700451 |
| CDH4     | 0.912422 | 0.400459 | 2.0789   | 0.827321 |
| RAD23A   | 1.288368 | 0.715973 | 2.318375 | 0.39794  |
| GADD45G  | 1.289461 | 0.722654 | 2.30084  | 0.389515 |
| MEIS3P1  | 1.405518 | 0.578031 | 3.417603 | 0.452724 |
| DAND5    | 0.112592 | 0.007839 | 1.617199 | 0.108187 |
| TMEM151  | 3.121867 | 0.055418 | 175.8637 | 0.579926 |
| PTPN11   | 0.291619 | 0.135102 | 0.629459 | 0.001695 |
| NSUN7    | 3.109231 | 0.339366 | 28.48643 | 0.315504 |
| WSCD1    | 0.059119 | 0.005982 | 0.584304 | 0.015534 |
| CLK3     | 0.777464 | 0.280168 | 2.15746  | 0.628829 |
| HLA-DQB1 | 1.210571 | 0.943153 | 1.553812 | 0.133506 |
| GATA2    | 0.936113 | 0.692735 | 1.264998 | 0.667375 |
| ARID3B   | 1.33343  | 0.730309 | 2.434634 | 0.348866 |
| PACS2    | 1.913153 | 0.754011 | 4.854246 | 0.172058 |
| ELMOD2   | 2.920683 | 0.726853 | 11.73607 | 0.130944 |
| EGR3     | 1.800832 | 0.775484 | 4.181898 | 0.17117  |

|          |          |          |          |          |
|----------|----------|----------|----------|----------|
| GPC5     | 11.71704 | 2.60321  | 52.73839 | 0.001344 |
| VWA1     | 22.33665 | 5.28646  | 94.37806 | 2.39E-05 |
| GEMIN4   | 0.770974 | 0.370446 | 1.604555 | 0.486722 |
| FJX1     | 1.986179 | 0.615171 | 6.412702 | 0.251174 |
| KLHL28   | 0.880175 | 0.422233 | 1.834787 | 0.733438 |
| MKRN3    | 0.240628 | 0.071804 | 0.806388 | 0.020959 |
| SHARPIN  | 2.273446 | 1.053693 | 4.905183 | 0.036326 |
| LBX2     | 0.837251 | 0.3896   | 1.799252 | 0.649039 |
| DNHD1    | 0.200405 | 0.057645 | 0.696716 | 0.011459 |
| SLITRK4  | 1.175739 | 0.922007 | 1.499296 | 0.191798 |
| GCC1     | 1.212801 | 0.604322 | 2.433945 | 0.58723  |
| RNF151   | 0.000111 | 8.06E-07 | 0.015296 | 0.000291 |
| CIITA    | 1.135    | 0.705802 | 1.825193 | 0.60135  |
| ZFPM1    | 0.893483 | 0.58783  | 1.358066 | 0.598031 |
| ALOX15B  | 0.711746 | 0.144223 | 3.512504 | 0.676325 |
| PLD6     | 0.795653 | 0.429793 | 1.472949 | 0.466925 |
| CDC42EP4 | 1.004102 | 0.643943 | 1.565699 | 0.985591 |
| ZBTB42   | 1.675977 | 1.022177 | 2.747956 | 0.040667 |
| MAF1     | 1.665562 | 0.891741 | 3.110877 | 0.109488 |
| FCER1A   | 0.954574 | 0.784923 | 1.160893 | 0.641467 |
| FLJ37453 | 0.716733 | 0.217875 | 2.357806 | 0.583565 |
| APOBEC3E | 0.550853 | 0.292048 | 1.039002 | 0.065506 |
| PIPOX    | 0.120689 | 0.010766 | 1.352901 | 0.086374 |
| CDH5     | 2.537111 | 0.328657 | 19.58553 | 0.371937 |
| MYADM    | 1.655923 | 0.859072 | 3.191908 | 0.13199  |
| SERTAD2  | 1.008176 | 0.547458 | 1.856616 | 0.979149 |
| AKAP5    | 1.255523 | 0.086548 | 18.21339 | 0.867565 |
| NKPD1    | 6.383337 | 0.257684 | 158.128  | 0.257664 |
| GIPC3    | 2.008758 | 0.157161 | 25.67505 | 0.591585 |
| CITED4   | 1.28343  | 0.882738 | 1.866006 | 0.191285 |
| ABCA13   | 0.893282 | 0.672582 | 1.186404 | 0.435725 |
| TIGD5    | 0.870513 | 0.457889 | 1.654974 | 0.672258 |
| PDXDC1   | 0.529796 | 0.232383 | 1.207848 | 0.130828 |
| ZNF154   | 1.387986 | 0.698259 | 2.759011 | 0.349624 |
| R3HDM2   | 0.286103 | 0.04839  | 1.691575 | 0.167525 |
| B3GNT3   | 1.597457 | 0.190934 | 13.36519 | 0.665604 |
| ITLN1    | 1.019336 | 0.643071 | 1.615754 | 0.935057 |
| SEPHS2   | 0.767949 | 0.31931  | 1.846938 | 0.555395 |
| GPBAR1   | 1.21479  | 0.977612 | 1.509509 | 0.079146 |
| ZNF784   | 0.871622 | 0.405894 | 1.871736 | 0.724568 |
| BBS10    | 1.337524 | 0.54463  | 3.284744 | 0.525813 |
| FIZ1     | 1.890104 | 0.70752  | 5.049314 | 0.20414  |
| PUF60    | 0.710812 | 0.33949  | 1.488275 | 0.365276 |
| DCTPP1   | 0.551998 | 0.294055 | 1.036208 | 0.064419 |
| ZNF771   | 1.794051 | 0.11568  | 27.82346 | 0.676042 |
| TSHZ1    | 1.292156 | 0.613574 | 2.721217 | 0.499979 |
| PSTK     | 0.538245 | 0.141766 | 2.043572 | 0.362817 |
| SOCS4    | 0.333502 | 0.062199 | 1.788199 | 0.199975 |
| ZADH2    | 0.583869 | 0.299754 | 1.137276 | 0.113693 |
| ZNF48    | 3.123254 | 0.547727 | 17.80943 | 0.199766 |
| TMEM150I | 2.430373 | 0.609696 | 9.687961 | 0.20815  |
| ANKRD18I | 0.334903 | 0.027734 | 4.044138 | 0.389431 |
| TMEM86B  | 1.006017 | 0.632379 | 1.600419 | 0.979794 |
| TRNAU1AI | 0.208808 | 0.022832 | 1.909622 | 0.165414 |
| EXOC3    | 0.732425 | 0.279699 | 1.917942 | 0.526078 |
| CSNK1A1L | 8.976273 | 1.305282 | 61.72879 | 0.025696 |
| LYNX1    | 6.201061 | 0.055204 | 696.5692 | 0.448764 |
| MED14    | 0.486442 | 0.180126 | 1.313668 | 0.155108 |

|         |          |          |          |          |
|---------|----------|----------|----------|----------|
| FAHD1   | 0.291497 | 0.085595 | 0.992709 | 0.048648 |
| RCC1    | 0.198764 | 0.054965 | 0.718772 | 0.01376  |
| MYLPF   | 1.072014 | 0.26459  | 4.343372 | 0.922397 |
| F2      | 0.840063 | 0.10888  | 6.481501 | 0.867231 |
| PRKRA   | 0.457981 | 0.259918 | 0.806972 | 0.006892 |
| ZNRF2   | 0.388319 | 0.111979 | 1.346602 | 0.135981 |
| FGD6    | 0.126366 | 0.011842 | 1.348427 | 0.086807 |
| OAZ2    | 1.499532 | 0.730606 | 3.077717 | 0.269429 |
| PNPLA1  | 1.07826  | 0.227671 | 5.106688 | 0.924348 |
| CCDC43  | 1.306111 | 0.421847 | 4.043948 | 0.64327  |
| KCTD4   | 0.500286 | 0.020252 | 12.3586  | 0.672092 |
| FZD2    | 1.705515 | 1.246517 | 2.333529 | 0.000845 |
| TIGD2   | 1.457994 | 0.489098 | 4.346257 | 0.498655 |
| HCLS1   | 0.765594 | 0.423817 | 1.382988 | 0.376003 |
| ZNF609  | 1.253865 | 0.592063 | 2.655423 | 0.554579 |
| PAK2    | 0.758695 | 0.24946  | 2.307454 | 0.626536 |
| CCDC66  | 0.372381 | 0.156436 | 0.886419 | 0.025586 |
| MCFD2   | 1.047679 | 0.409941 | 2.677533 | 0.922496 |
| HARBI1  | 1.707906 | 0.214144 | 13.62139 | 0.613377 |
| GAS1    | 0.955362 | 0.268251 | 3.402477 | 0.943825 |
| ZNF571  | 0.704341 | 0.125191 | 3.962711 | 0.69087  |
| KCNE1   | 0.817677 | 0.266502 | 2.508785 | 0.724909 |
| NRIP1   | 1.300006 | 0.824074 | 2.050806 | 0.259302 |
| BHLHA15 | 1.1687   | 0.093759 | 14.56778 | 0.903607 |
| RNF182  | 1.103629 | 0.770734 | 1.580306 | 0.590367 |
| TSPYL5  | 0.870921 | 0.410827 | 1.846286 | 0.718471 |
| FUT7    | 2.075166 | 1.100435 | 3.913286 | 0.024091 |
| SSTR2   | 1.17813  | 0.734018 | 1.890947 | 0.497105 |
| ZNF594  | 0.597743 | 0.279179 | 1.27981  | 0.185234 |
| PCGF5   | 1.214008 | 0.477428 | 3.086989 | 0.683811 |
| PRF1    | 0.931968 | 0.698423 | 1.243607 | 0.632148 |
| YOD1    | 0.629719 | 0.318005 | 1.246982 | 0.184591 |
| TMEM64  | 0.85788  | 0.129052 | 5.702799 | 0.873977 |
| CHRM4   | 1.387442 | 0.163776 | 11.75386 | 0.763892 |
| SHISA2  | 1.165172 | 0.559095 | 2.428259 | 0.683253 |
| S1PR5   | 0.989449 | 0.713534 | 1.372059 | 0.949297 |
| GPR157  | 2.361492 | 0.138851 | 40.16274 | 0.552276 |
| PIPSL   | 1.164617 | 0.408847 | 3.31746  | 0.775392 |
| CHST13  | 1.032479 | 0.752615 | 1.416411 | 0.842933 |
| SLC36A4 | 0.936947 | 0.591302 | 1.484638 | 0.781536 |
| ZDHHC20 | 2.23634  | 0.589531 | 8.483386 | 0.236749 |
| ZFP3    | 2.480234 | 1.096363 | 5.610884 | 0.029195 |
| MAP3K15 | 0.320808 | 0.059541 | 1.728523 | 0.185808 |
| PPA1    | 1.078236 | 0.729137 | 1.594479 | 0.705894 |
| PSMG4   | 1.20859  | 0.371288 | 3.934112 | 0.753051 |
| MAP6D1  | 1.108966 | 0.621945 | 1.977357 | 0.72595  |
| ZNF443  | 2.618027 | 0.646907 | 10.59513 | 0.177235 |
| SSR4    | 1.89255  | 0.754798 | 4.745306 | 0.173776 |
| CAPS2   | 0.192384 | 0.015657 | 2.363914 | 0.197818 |
| ZNF792  | 0.91302  | 0.52923  | 1.57513  | 0.743631 |
| CUEDC1  | 1.375864 | 0.970508 | 1.950526 | 0.073156 |
| SCRIB   | 0.590854 | 0.119818 | 2.913655 | 0.518055 |
| KCTD2   | 13.39831 | 1.275981 | 140.6876 | 0.030533 |
| D2HGDH  | 1.253638 | 0.779589 | 2.015943 | 0.350995 |
| OXTR    | 0.384157 | 0.073622 | 2.004513 | 0.256384 |
| FAM83H  | 1.184781 | 0.554637 | 2.530852 | 0.661495 |
| ZNF572  | 1.174646 | 0.178428 | 7.733069 | 0.867048 |
| ST20    | 2.122926 | 0.192772 | 23.37892 | 0.538543 |

|          |          |          |          |          |
|----------|----------|----------|----------|----------|
| PITPNB   | 1.015342 | 0.252734 | 4.079074 | 0.982879 |
| TCEAL8   | 0.957179 | 0.521076 | 1.758271 | 0.887824 |
| LRRRC57  | 0.567434 | 0.263094 | 1.223825 | 0.148483 |
| MRPL14   | 0.936681 | 0.419091 | 2.093509 | 0.873346 |
| GPR137C  | 5.008951 | 0.653073 | 38.41772 | 0.121125 |
| BBS12    | 1.640141 | 0.386742 | 6.955713 | 0.502085 |
| ZFP82    | 0.392688 | 0.15634  | 0.98634  | 0.046675 |
| NQO1     | 1.68213  | 0.370463 | 7.6379   | 0.500523 |
| OR56B1   | 0.890938 | 0.110585 | 7.177885 | 0.913616 |
| AEN      | 0.317961 | 0.101532 | 0.995735 | 0.049148 |
| FKRP     | 1.077945 | 0.343776 | 3.380008 | 0.897576 |
| TRAPPC5  | 1.442913 | 0.848171 | 2.454689 | 0.176206 |
| RPH3AL   | 0.882193 | 0.211247 | 3.684144 | 0.863539 |
| SLC25A42 | 0.513015 | 0.226178 | 1.163616 | 0.110194 |
| FCRL6    | 1.210172 | 0.483149 | 3.03119  | 0.683861 |
| SLC26A11 | 2.442226 | 0.400577 | 14.88968 | 0.333    |
| HIGD1A   | 0.955373 | 0.5614   | 1.625826 | 0.866349 |
| OR52N4   | 0.179899 | 0.005313 | 6.091554 | 0.339824 |
| MAPK15   | 0.355913 | 0.087681 | 1.444716 | 0.148386 |
| EHMT1    | 2.039507 | 0.121065 | 34.35829 | 0.620866 |
| F2R      | 1.072334 | 0.467914 | 2.457504 | 0.868903 |
| ZNF707   | 1.738507 | 0.632796 | 4.776273 | 0.283492 |
| NPM1     | 0.688917 | 0.041259 | 11.50319 | 0.795307 |
| PJA1     | 0.541893 | 0.10761  | 2.728808 | 0.457577 |
| DHTKD1   | 0.674436 | 0.316376 | 1.437732 | 0.307789 |
| PENK     | 2.778679 | 0.709682 | 10.87961 | 0.142235 |
| ZNF746   | 1.459291 | 0.730431 | 2.915441 | 0.284454 |
| POLR2A   | 2.092514 | 1.038055 | 4.218099 | 0.038981 |
| FRAT2    | 1.122652 | 0.760146 | 1.658033 | 0.560892 |
| TMEM102  | 1.833249 | 0.259614 | 12.94538 | 0.543361 |
| CCL13    | 0.481685 | 0.072979 | 3.179279 | 0.448055 |
| DDX60L   | 1.341747 | 0.765057 | 2.353139 | 0.305066 |
| AATK     | 2.65508  | 0.171587 | 41.08371 | 0.484735 |
| DDN      | 0.348193 | 0.080182 | 1.512031 | 0.159095 |
| SAGE1    | 0.315031 | 0.081994 | 1.210387 | 0.092582 |
| ZNF467   | 1.207849 | 0.915292 | 1.593918 | 0.182048 |
| ZNF678   | 0.857425 | 0.091743 | 8.013475 | 0.892695 |
| TMEM45A  | 1.40964  | 0.671905 | 2.957388 | 0.363793 |
| RAP2B    | 2.746203 | 0.246747 | 30.56419 | 0.411244 |
| ZBTB2    | 1.257836 | 0.517353 | 3.058167 | 0.612809 |
| RNF135   | 1.857764 | 0.894909 | 3.856579 | 0.096509 |
| ACBD4    | 2.324016 | 0.709562 | 7.611808 | 0.163576 |
| SGSH     | 1.252891 | 0.962389 | 1.631083 | 0.093911 |
| MAB21L2  | 9.141286 | 0.549422 | 152.0926 | 0.122954 |
| FANCB    | 0.088893 | 0.022203 | 0.355902 | 0.000627 |
| SETD2    | 0.735596 | 0.359318 | 1.505914 | 0.400896 |
| TMIE     | 2.982735 | 0.466421 | 19.07443 | 0.248352 |
| MEX3D    | 2.470183 | 0.977608 | 6.241567 | 0.055866 |
| MRPS23   | 1.004214 | 0.504543 | 1.998732 | 0.990446 |
| OR52H1   | 1.587877 | 0.108432 | 23.25287 | 0.735621 |
| GPR135   | 1.092774 | 0.051211 | 23.31828 | 0.954692 |
| P2RY13   | 1.054406 | 0.661164 | 1.681536 | 0.823948 |
| ZFP41    | 0.342254 | 0.02196  | 5.334192 | 0.444157 |
| PHLDA2   | 0.995774 | 0.155534 | 6.375243 | 0.996433 |
| ATG9B    | 0.46412  | 0.053674 | 4.013228 | 0.485537 |
| GPR88    | 0.624798 | 0.040143 | 9.724642 | 0.737006 |
| PLAG1    | 2.094532 | 0.399615 | 10.97823 | 0.381722 |
| YIPF6    | 0.529564 | 0.272734 | 1.028247 | 0.060424 |

|          |          |          |          |          |
|----------|----------|----------|----------|----------|
| ZBTB20   | 0.573007 | 0.352484 | 0.931495 | 0.02469  |
| AMIGO1   | 0.181036 | 0.015651 | 2.094018 | 0.171231 |
| GPR3     | 1.725294 | 0.472142 | 6.304545 | 0.409431 |
| SIAH2    | 1.287886 | 0.810066 | 2.04755  | 0.284834 |
| SLC9A9   | 1.553487 | 0.888324 | 2.716714 | 0.122417 |
| LSM10    | 2.577279 | 1.215458 | 5.464911 | 0.013558 |
| RELL1    | 0.904222 | 0.348544 | 2.345806 | 0.836014 |
| RFX7     | 0.669528 | 0.387799 | 1.155929 | 0.1499   |
| SLC35C1  | 2.250443 | 1.127694 | 4.491015 | 0.0214   |
| TIGIT    | 0.351296 | 0.050352 | 2.45091  | 0.291204 |
| RNF41    | 0.634205 | 0.144036 | 2.792478 | 0.547092 |
| SLC2A4   | 0.349551 | 0.038132 | 3.204276 | 0.352458 |
| CLDN7    | 2.012723 | 0.881429 | 4.596003 | 0.096838 |
| ZNF329   | 0.763958 | 0.353695 | 1.650097 | 0.493178 |
| ZNF101   | 1.780871 | 0.74569  | 4.253109 | 0.193842 |
| ADO      | 1.980737 | 0.9772   | 4.01486  | 0.057962 |
| PRKAG1   | 1.405986 | 0.664942 | 2.972886 | 0.372457 |
| GINS3    | 0.390177 | 0.194879 | 0.781194 | 0.007881 |
| OR52K2   | 1.260738 | 0.237627 | 6.688899 | 0.785522 |
| CCDC149  | 2.751437 | 0.63547  | 11.91308 | 0.175863 |
| MRPS11   | 0.859181 | 0.325868 | 2.265313 | 0.758968 |
| SNRPE    | 1.099527 | 0.499673 | 2.419501 | 0.813597 |
| RTKN2    | 192.0452 | 8.785092 | 4198.177 | 0.000836 |
| CHST15   | 1.221215 | 1.011375 | 1.474594 | 0.037751 |
| TRPC2    | 1.71375  | 0.908903 | 3.231301 | 0.095958 |
| IDH2     | 0.865278 | 0.517294 | 1.447351 | 0.581421 |
| TNRC18   | 0.712424 | 0.053365 | 9.510806 | 0.797605 |
| TMEM30B  | 0.462857 | 0.084376 | 2.539067 | 0.375066 |
| DEXI     | 0.744536 | 0.395868 | 1.400301 | 0.360034 |
| NOP10    | 0.869587 | 0.338975 | 2.230791 | 0.77127  |
| FAM89A   | 1.085366 | 0.718048 | 1.640586 | 0.697555 |
| TDRKH    | 0.577962 | 0.042252 | 7.905839 | 0.681232 |
| ZNF708   | 1.177607 | 0.493983 | 2.807299 | 0.712248 |
| MRPL41   | 1.404332 | 0.862236 | 2.287249 | 0.172448 |
| CREB3L2  | 0.682723 | 0.336101 | 1.386818 | 0.29117  |
| P2RY8    | 1.119328 | 0.649494 | 1.929034 | 0.684793 |
| TP53TG1  | 0.620481 | 0.257391 | 1.495763 | 0.287739 |
| UNC5C    | 1.030745 | 0.131612 | 8.072486 | 0.976995 |
| TSEN54   | 0.554147 | 0.307456 | 0.998776 | 0.049526 |
| RGMA     | 2.174766 | 0.670326 | 7.055686 | 0.19572  |
| UBA7     | 0.624795 | 0.371018 | 1.052156 | 0.076933 |
| MRPS16   | 0.493    | 0.166513 | 1.459639 | 0.201578 |
| LDOC1    | 1.318124 | 0.854322 | 2.033718 | 0.211898 |
| ARL6IP4  | 1.299626 | 0.512601 | 3.295011 | 0.580863 |
| EXT1     | 2.474221 | 1.02455  | 5.975078 | 0.044022 |
| SHMT2    | 0.895748 | 0.4261   | 1.883043 | 0.771488 |
| ATP6AP2  | 0.700578 | 0.384095 | 1.277835 | 0.245864 |
| ZAR1     | 3.30767  | 0.269562 | 40.58682 | 0.349713 |
| BACE2    | 1.324928 | 0.751162 | 2.336957 | 0.331183 |
| UBE2E2   | 0.879191 | 0.618486 | 1.249791 | 0.473092 |
| SYNM     | 1.081158 | 0.135753 | 8.610516 | 0.941242 |
| IZUMO1   | 0.940825 | 0.04667  | 18.96625 | 0.96825  |
| B4GALNT4 | 0.769707 | 0.163206 | 3.63008  | 0.740825 |
| AP1S2    | 1.080895 | 0.744197 | 1.569927 | 0.682913 |
| DCAF4L1  | 0.171765 | 0.014289 | 2.064813 | 0.164986 |
| ZSCAN22  | 1.953447 | 0.44831  | 8.511873 | 0.372583 |
| KCNJ14   | 0.08616  | 0.003969 | 1.870593 | 0.118486 |
| FBXL6    | 2.069507 | 0.732099 | 5.850107 | 0.170127 |



|          |          |          |          |          |
|----------|----------|----------|----------|----------|
| C1S      | 1.74075  | 0.053874 | 56.24637 | 0.75458  |
| GLTPD2   | 1.049749 | 0.045167 | 24.39789 | 0.975869 |
| KBTBD3   | 0.962911 | 0.102166 | 9.07544  | 0.973659 |
| CLN8     | 0.80667  | 0.215575 | 3.018514 | 0.749654 |
| PLCXD1   | 1.379851 | 0.845697 | 2.251381 | 0.197394 |
| NXPH4    | 0.05666  | 0.0004   | 8.032554 | 0.256085 |
| CACNB4   | 1.666681 | 0.062516 | 44.43399 | 0.760401 |
| TRAPPC6B | 0.318815 | 0.102669 | 0.990003 | 0.048003 |
| PGBD4    | 1.857138 | 0.389393 | 8.85727  | 0.437363 |
| NPLOC4   | 1.253266 | 0.53355  | 2.943822 | 0.604362 |
| CAPN12   | 1.081163 | 0.36017  | 3.245445 | 0.889336 |
| EXOC7    | 0.284408 | 0.068747 | 1.176596 | 0.082653 |
| KPNA2    | 0.741559 | 0.322163 | 1.70693  | 0.482099 |
| NCF1B    | 1.110692 | 0.842056 | 1.465028 | 0.457411 |
| BGN      | 1.068221 | 0.618096 | 1.846148 | 0.813107 |
| CEP97    | 0.643505 | 0.059331 | 6.979443 | 0.717017 |
| FES      | 0.645711 | 0.401589 | 1.038234 | 0.071056 |
| GLRX5    | 1.072035 | 0.623406 | 1.843515 | 0.801441 |
| FAM104B  | 0.215543 | 0.053019 | 0.87627  | 0.031989 |
| MXRA7    | 0.859541 | 0.184859 | 3.996611 | 0.846934 |
| LIMK2    | 0.593254 | 0.120327 | 2.92494  | 0.521235 |
| MFSD5    | 2.880772 | 1.431453 | 5.797498 | 0.003025 |
| ADI1     | 1.032745 | 0.686073 | 1.55459  | 0.87729  |
| SPNS3    | 1.477323 | 1.058522 | 2.061821 | 0.02177  |
| SATB1    | 0.622294 | 0.250648 | 1.544992 | 0.30661  |
| CSF1R    | 1.589526 | 1.179493 | 2.1421   | 0.002331 |
| EPHB3    | 1.839933 | 0.686142 | 4.933894 | 0.225695 |
| EPGN     | 0.105299 | 0.010286 | 1.077974 | 0.057868 |
| HS3ST4   | 0.418374 | 0.049891 | 3.508399 | 0.421904 |
| TRAK1    | 0.810868 | 0.303856 | 2.163876 | 0.675486 |
| PLCB1    | 3.420818 | 0.939506 | 12.45548 | 0.062136 |
| SKA2     | 0.493871 | 0.148931 | 1.637731 | 0.248736 |
| NDN      | 0.952676 | 0.772048 | 1.175564 | 0.651282 |
| TTC3     | 0.340164 | 0.141286 | 0.818988 | 0.016155 |
| GALR2    | 1.238111 | 0.781032 | 1.962685 | 0.363554 |
| TSKU     | 1.298491 | 0.529837 | 3.18226  | 0.567917 |
| ANXA2    | 1.395412 | 0.998808 | 1.949501 | 0.050823 |
| RGS6     | 0.495111 | 0.048452 | 5.059363 | 0.553313 |
| HOXB4    | 1.540707 | 1.010706 | 2.348635 | 0.044487 |
| PAQR7    | 1.136841 | 0.684704 | 1.887542 | 0.62005  |
| PAPPA    | 2.062589 | 0.264816 | 16.065   | 0.489401 |
| MAFA     | 0.863286 | 0.116035 | 6.422748 | 0.885837 |
| NGRN     | 0.74429  | 0.296319 | 1.8695   | 0.529691 |
| RPS17    | 1.044514 | 0.236277 | 4.617505 | 0.954202 |
| CRIP2    | 1.209133 | 0.962018 | 1.519724 | 0.103524 |
| DDX28    | 1.921511 | 0.973638 | 3.792177 | 0.059708 |
| ACBD3    | 1.103399 | 0.541929 | 2.246584 | 0.786211 |
| VMO1     | 1.497644 | 0.544043 | 4.12272  | 0.434362 |
| ALG12    | 0.958256 | 0.116857 | 7.857914 | 0.968318 |
| LCK      | 1.046308 | 0.306629 | 3.570304 | 0.942375 |
| COL18A1  | 0.88544  | 0.260581 | 3.008679 | 0.845424 |
| RBM10    | 0.514588 | 0.113436 | 2.334374 | 0.389154 |
| GLUD2    | 1.327654 | 0.112338 | 15.69073 | 0.82204  |
| RPL35A   | 1.309908 | 0.629588 | 2.725369 | 0.470181 |
| SLC25A18 | 0.412979 | 0.03575  | 4.77062  | 0.478704 |
| ZNF721   | 0.704693 | 0.468105 | 1.060856 | 0.09356  |
| CEP63    | 0.138248 | 0.025077 | 0.762154 | 0.023098 |
| WFDC10B  | 4.970774 | 0.129685 | 190.5276 | 0.388701 |

|          |          |          |          |          |
|----------|----------|----------|----------|----------|
| EWSR1    | 0.407013 | 0.145164 | 1.141192 | 0.087472 |
| ODF3L1   | 0.225203 | 0.025825 | 1.963847 | 0.177285 |
| HMGNA4   | 0.551329 | 0.248646 | 1.222473 | 0.142774 |
| SPATA13  | 0.840886 | 0.428977 | 1.648317 | 0.613802 |
| CNOT10   | 0.457316 | 0.207438 | 1.008194 | 0.052412 |
| MTA1     | 1.118357 | 0.587398 | 2.129256 | 0.733492 |
| ZNF662   | 1.759852 | 0.48269  | 6.416294 | 0.391785 |
| CADM1    | 2.450832 | 1.416587 | 4.240174 | 0.00135  |
| ZNF320   | 0.643732 | 0.187237 | 2.213185 | 0.484495 |
| PYCR1    | 1.982489 | 0.596831 | 6.585225 | 0.26386  |
| SPNS2    | 1.617316 | 1.067006 | 2.451449 | 0.023476 |
| AP2A2    | 2.346065 | 1.058758 | 5.198564 | 0.035675 |
| SLC8A1   | 0.901297 | 0.14954  | 5.432246 | 0.909721 |
| SLC25A21 | 0.769379 | 0.231762 | 2.5541   | 0.668468 |
| ABAT     | 2.175664 | 0.249944 | 18.93828 | 0.481377 |
| SLC25A10 | 0.960425 | 0.394612 | 2.337525 | 0.929101 |
| CAMK1D   | 7.34257  | 2.70886  | 19.90259 | 8.90E-05 |
| LYSMD4   | 0.394932 | 0.133197 | 1.170982 | 0.09387  |
| AFMID    | 0.757038 | 0.450165 | 1.273105 | 0.293941 |
| GAS6     | 1.543491 | 0.984366 | 2.420203 | 0.058584 |
| NEB      | 0.141136 | 0.020133 | 0.989379 | 0.048757 |
| BEGAIN   | 0.847805 | 0.357049 | 2.013093 | 0.708255 |
| GPC6     | 0.800043 | 0.158401 | 4.040818 | 0.787173 |
| CSMD1    | 0.694843 | 0.288953 | 1.670884 | 0.416075 |
| GPR19    | 1.997223 | 0.187267 | 21.30055 | 0.566775 |
| RABIF    | 0.897989 | 0.197146 | 4.090299 | 0.889381 |
| TMEM119  | 1.328043 | 0.573233 | 3.076755 | 0.508076 |
| FANCF    | 0.253431 | 0.063093 | 1.017977 | 0.053009 |
| CALN1    | 1.546011 | 0.149382 | 16.00024 | 0.714812 |
| RUVBL2   | 1.26646  | 0.667604 | 2.402505 | 0.469615 |
| PTTG1IP  | 1.006453 | 0.521    | 1.944239 | 0.984723 |
| DDX41    | 1.441981 | 0.652207 | 3.188109 | 0.365903 |
| DAZAP2   | 0.741891 | 0.352124 | 1.563094 | 0.432331 |
| ZNF623   | 16.36884 | 0.597349 | 448.5467 | 0.09794  |
| CCDC125  | 0.894424 | 0.486552 | 1.644212 | 0.719458 |
| BCOR     | 0.878515 | 0.395681 | 1.950533 | 0.750281 |
| JRKL     | 0.341911 | 0.082132 | 1.423367 | 0.140259 |
| KIAA2026 | 0.400303 | 0.11376  | 1.408601 | 0.153795 |
| FHL3     | 1.291258 | 0.780764 | 2.135531 | 0.319334 |
| TMEM89   | 1.371743 | 0.225914 | 8.3292   | 0.731246 |
| SF3A3    | 0.415881 | 0.224856 | 0.769189 | 0.005168 |
| ASB7     | 0.344424 | 0.085887 | 1.381206 | 0.13253  |
| TREX2    | 1.304093 | 0.094364 | 18.02241 | 0.842921 |
| GPR132   | 1.36024  | 0.720758 | 2.567094 | 0.342394 |
| MX2      | 2.002876 | 1.234016 | 3.250778 | 0.00494  |
| EP400    | 0.890177 | 0.390369 | 2.029915 | 0.782085 |
| MEX3B    | 0.959859 | 0.690638 | 1.334025 | 0.807277 |
| PI4KAP2  | 0.587539 | 0.30327  | 1.138265 | 0.114992 |
| PSMG1    | 0.602899 | 0.276284 | 1.315629 | 0.203745 |
| KLRC4    | 0.044669 | 0.00267  | 0.747177 | 0.030561 |
| SERHL2   | 4.26594  | 1.518751 | 11.98238 | 0.005905 |
| PCBP3    | 0.801712 | 0.249617 | 2.574915 | 0.710464 |
| SETD3    | 0.196721 | 0.04489  | 0.862083 | 0.03102  |
| TNFAIP8L | 0.4579   | 0.050068 | 4.18779  | 0.489122 |
| ZNRF3    | 1.915145 | 0.269648 | 13.6021  | 0.515926 |
| SFXN4    | 0.902311 | 0.375068 | 2.170715 | 0.818473 |
| FAM167B  | 0.232183 | 0.011667 | 4.620813 | 0.338601 |
| MRPL54   | 1.764852 | 0.950367 | 3.277365 | 0.072055 |

|          |          |          |          |          |
|----------|----------|----------|----------|----------|
| ZNF438   | 1.390319 | 0.726514 | 2.660634 | 0.319671 |
| CCR3     | 1.048975 | 0.202584 | 5.431575 | 0.954554 |
| ZNF530   | 0.075448 | 0.005658 | 1.005992 | 0.050531 |
| NDUFB1   | 3.681627 | 0.691113 | 19.61239 | 0.126738 |
| KLHL25   | 2.74659  | 0.444321 | 16.97818 | 0.276982 |
| TRMT12   | 0.656012 | 0.298136 | 1.443475 | 0.294761 |
| BMP8A    | 1.966284 | 0.165645 | 23.34068 | 0.592202 |
| EFHC2    | 0.911801 | 0.492806 | 1.687036 | 0.768671 |
| NOG      | 1.144217 | 0.552103 | 2.371357 | 0.717103 |
| UPP1     | 2.098486 | 1.004792 | 4.382642 | 0.048531 |
| TRIM52   | 0.214748 | 0.070535 | 0.653807 | 0.006768 |
| CMTM4    | 0.463844 | 0.146858 | 1.465028 | 0.190475 |
| TMEM50A  | 0.569807 | 0.194732 | 1.667317 | 0.304537 |
| ASCL2    | 1.220165 | 0.785426 | 1.895535 | 0.375974 |
| TBK1     | 1.026911 | 0.533901 | 1.975172 | 0.936578 |
| CBX6     | 1.508993 | 0.942109 | 2.416981 | 0.086924 |
| MACC1    | 0.319148 | 0.0202   | 5.042348 | 0.417337 |
| TBL3     | 1.224518 | 0.570728 | 2.627247 | 0.603043 |
| KREMEN1  | 0.002829 | 4.06E-05 | 0.19722  | 0.006736 |
| TRAIP    | 0.292398 | 0.079396 | 1.076839 | 0.064506 |
| CHEK2    | 0.075332 | 0.017327 | 0.327516 | 0.000564 |
| AIFM3    | 1.217619 | 0.294598 | 5.032607 | 0.785659 |
| ZNF703   | 5.432231 | 1.460143 | 20.20975 | 0.011581 |
| EMILIN3  | 0.05869  | 0.002852 | 1.207874 | 0.066126 |
| OLFML1   | 1.374158 | 0.136236 | 13.86057 | 0.787516 |
| RBM12B   | 0.873603 | 0.387342 | 1.970304 | 0.744697 |
| CCR4     | 3.037429 | 0.745366 | 12.37779 | 0.121148 |
| LIN9     | 1.021469 | 0.34763  | 3.001465 | 0.969189 |
| BTBD9    | 0.583778 | 0.033839 | 10.07124 | 0.711071 |
| NUDT14   | 1.325052 | 0.959722 | 1.829449 | 0.087236 |
| PNMA3    | 1.036424 | 0.562487 | 1.909686 | 0.908657 |
| IQGAP3   | 0.406596 | 0.064039 | 2.581547 | 0.339936 |
| TOB2     | 2.851925 | 0.995473 | 8.170461 | 0.050996 |
| SCN5A    | 0.340471 | 0.002649 | 43.76719 | 0.663679 |
| ARSI     | 1.141042 | 0.06325  | 20.58444 | 0.928763 |
| UTY      | 0.666442 | 0.20627  | 2.153224 | 0.497653 |
| TTC32    | 0.727861 | 0.288628 | 1.835518 | 0.500901 |
| DNAH2    | 1.117741 | 0.453057 | 2.757588 | 0.809102 |
| SH2D1A   | 1.3056   | 1.010744 | 1.686473 | 0.041173 |
| PRKX     | 0.938229 | 0.366227 | 2.403628 | 0.894318 |
| KCNH8    | 2.88056  | 0.464354 | 17.86919 | 0.255886 |
| SMTN     | 9.068909 | 1.388245 | 59.24395 | 0.021305 |
| NPW      | 1.002312 | 0.75937  | 1.322978 | 0.986991 |
| ST6GALNA | 1.614813 | 0.230763 | 11.3     | 0.629265 |
| PTP4A2   | 0.230442 | 0.043285 | 1.226837 | 0.08537  |
| ACTG1    | 2.270353 | 0.636319 | 8.100503 | 0.206442 |
| DENND5A  | 0.652492 | 0.319729 | 1.331585 | 0.240747 |
| DIABLO   | 0.712628 | 0.245501 | 2.068585 | 0.53321  |
| VPS33B   | 0.733002 | 0.307184 | 1.749088 | 0.483936 |
| TBX1     | 0.304819 | 0.023327 | 3.983153 | 0.364938 |
| ADAP2    | 1.170086 | 0.896572 | 1.527039 | 0.247564 |
| FAM120C  | 4.445194 | 0.477452 | 41.38588 | 0.19002  |
| BRD7P2   | 0.531355 | 0.179818 | 1.570136 | 0.252691 |
| EIF3C    | 0.733768 | 0.319861 | 1.683277 | 0.464942 |
| CLDN5    | 1.256334 | 0.851765 | 1.853064 | 0.249804 |
| NIPSNAP1 | 0.865289 | 0.55046  | 1.36018  | 0.530669 |
| LRTOMT   | 0.119851 | 0.011383 | 1.26189  | 0.077346 |
| ADRA2C   | 0.894025 | 0.226866 | 3.52315  | 0.872802 |

|         |          |          |          |          |
|---------|----------|----------|----------|----------|
| NR2C2AP | 0.349571 | 0.120599 | 1.013274 | 0.052907 |
| CRELD2  | 1.321795 | 0.74961  | 2.330734 | 0.335012 |
| SCFD2   | 0.484458 | 0.14673  | 1.599533 | 0.234358 |
| UBE2F   | 0.43213  | 0.213636 | 0.874089 | 0.019576 |
| KCNJ12  | 7.566101 | 0.980192 | 58.40271 | 0.052285 |
| GPR173  | 0.011428 | 7.65E-05 | 1.707402 | 0.080026 |
| PPP1R2  | 0.790416 | 0.451715 | 1.383076 | 0.409997 |
| TSPYL2  | 0.652131 | 0.226281 | 1.879416 | 0.428584 |
| PGP     | 1.553927 | 0.472523 | 5.110206 | 0.468017 |
| SNRNP35 | 0.621162 | 0.110666 | 3.486541 | 0.588508 |
| IRAK1   | 0.945974 | 0.382174 | 2.341513 | 0.904398 |
| OLIG1   | 1.284574 | 0.954946 | 1.727983 | 0.097873 |
| PCDH9   | 0.112146 | 0.00382  | 3.292011 | 0.204464 |
| ACOT1   | 5.942391 | 1.311305 | 26.92891 | 0.020806 |
| OAF     | 1.549952 | 0.996299 | 2.411273 | 0.051953 |
| KCNK12  | 1.411614 | 0.913562 | 2.181194 | 0.12048  |
| POU6F1  | 0.493001 | 0.060875 | 3.992627 | 0.50752  |
| TM2D3   | 0.724498 | 0.19892  | 2.638742 | 0.625073 |
| TSSC4   | 1.326048 | 0.634029 | 2.77338  | 0.453492 |
| TACSTD2 | 0.91036  | 0.703686 | 1.177735 | 0.474726 |
| CLECL1  | 0.976458 | 0.802937 | 1.187479 | 0.81138  |
| ZDHHC23 | 0.536415 | 0.333109 | 0.863806 | 0.0104   |
| SRPK3   | 0.061543 | 0.003449 | 1.098294 | 0.057934 |
| EFNA5   | 0.605757 | 0.051583 | 7.113655 | 0.690004 |
| PKP3    | 8.05292  | 0.185169 | 350.2183 | 0.278466 |
| MAP7D2  | 0.261583 | 0.033561 | 2.038842 | 0.200548 |
| CSF1    | 0.66707  | 0.088492 | 5.028489 | 0.694444 |
| PLA2G6  | 2.313855 | 0.276457 | 19.36624 | 0.438989 |
| MAML2   | 2.354424 | 0.232986 | 23.79251 | 0.468099 |
| A3GALT2 | 2.262354 | 0.195143 | 26.22824 | 0.513758 |
| SS18L1  | 0.412853 | 0.089626 | 1.901763 | 0.256304 |
| TOP1MT  | 1.43351  | 0.831231 | 2.472178 | 0.195261 |
| COPB2   | 0.5011   | 0.259927 | 0.966045 | 0.039102 |
| LRRC19  | 0.002897 | 8.68E-05 | 0.096693 | 0.001093 |
| THAP7   | 5.371295 | 1.230213 | 23.45189 | 0.025386 |
| KNTC1   | 0.399674 | 0.219621 | 0.727339 | 0.002681 |
| CCR10   | 2.517604 | 0.224653 | 28.21382 | 0.453935 |
| WDR27   | 0.413078 | 0.173071 | 0.985917 | 0.04638  |
| TXNRD2  | 1.340675 | 0.132903 | 13.52419 | 0.803664 |
| FOXO4   | 1.640687 | 0.962261 | 2.797426 | 0.068964 |
| PTP4A3  | 2.147003 | 1.407319 | 3.275464 | 0.000392 |
| FOXD4L1 | 0.200381 | 0.022647 | 1.772964 | 0.148414 |
| PROS1   | 1.480217 | 0.995149 | 2.201723 | 0.052872 |
| GAST    | 0.517823 | 0.015691 | 17.08855 | 0.712197 |
| HDDC3   | 0.895923 | 0.409    | 1.96254  | 0.783549 |
| BEX5    | 1.36269  | 0.411588 | 4.511608 | 0.612415 |
| ZFP1    | 0.884706 | 0.211145 | 3.70696  | 0.866913 |
| CEND1   | 0.128434 | 0.010537 | 1.565465 | 0.107689 |
| DUSP8   | 1.045567 | 0.469548 | 2.328222 | 0.913128 |
| SOCS3   | 2.361018 | 1.545768 | 3.606235 | 7.03E-05 |
| LPAR5   | 1.307235 | 0.898571 | 1.901756 | 0.161279 |
| XPOT    | 0.331385 | 0.136895 | 0.80219  | 0.014341 |
| PDE4B   | 0.587854 | 0.279549 | 1.23618  | 0.161248 |
| SNN     | 1.789515 | 1.019409 | 3.141393 | 0.042671 |
| KCNH7   | 0.336866 | 0.006608 | 17.17184 | 0.587505 |
| NELL2   | 0.938055 | 0.539041 | 1.632432 | 0.821027 |
| KRBA2   | 0.600556 | 0.158184 | 2.280057 | 0.453793 |
| MED12   | 1.028681 | 0.504929 | 2.095709 | 0.937921 |

|           |          |          |          |          |
|-----------|----------|----------|----------|----------|
| ZNF93     | 0.321521 | 0.089166 | 1.159357 | 0.082918 |
| CDCA2     | 0.339756 | 0.112305 | 1.027865 | 0.055966 |
| ZBTB40    | 0.50435  | 0.225857 | 1.126241 | 0.094935 |
| EIF4ENIF1 | 0.978488 | 0.292816 | 3.269754 | 0.971817 |
| LRRC26    | 1.369119 | 1.012486 | 1.85137  | 0.041294 |
| ATL3      | 0.80462  | 0.389979 | 1.660123 | 0.556354 |
| NDUFA12   | 0.998502 | 0.441473 | 2.258363 | 0.997128 |
| TCTE3     | 14.76092 | 0.841921 | 258.7948 | 0.065444 |
| UBE2G2    | 0.214927 | 0.072883 | 0.633806 | 0.005329 |
| OSBP2     | 1.033424 | 0.842845 | 1.267096 | 0.751917 |
| APOO      | 0.410685 | 0.14587  | 1.156252 | 0.091977 |
| PRR16     | 0.592716 | 0.254028 | 1.382968 | 0.226306 |
| TMED9     | 1.277863 | 0.448344 | 3.642145 | 0.646362 |
| TMEM186   | 3.183521 | 0.759499 | 13.34407 | 0.113256 |
| SDR42E1   | 0.453638 | 0.011735 | 17.53609 | 0.671632 |
| RBM33     | 0.676591 | 0.418693 | 1.093345 | 0.110598 |
| ARMCX2    | 0.957814 | 0.488972 | 1.876196 | 0.900012 |
| BTBD6     | 1.089608 | 0.520258 | 2.282032 | 0.820012 |
| RBM43     | 0.667467 | 0.115041 | 3.872639 | 0.652237 |
| SUMO3     | 0.528741 | 0.181363 | 1.541477 | 0.243093 |
| IMMP2L    | 0.519723 | 0.26107  | 1.034634 | 0.062456 |
| JAG2      | 0.515973 | 0.034488 | 7.719421 | 0.631675 |
| FMNL1     | 1.646208 | 0.694584 | 3.901618 | 0.257551 |
| LCN12     | 0.889377 | 0.036892 | 21.44087 | 0.942444 |
| WT1       | 1.607268 | 0.789817 | 3.27077  | 0.190514 |
| ZFP90     | 1.046728 | 0.58453  | 1.874396 | 0.877898 |
| MUC6      | 1.45822  | 0.362752 | 5.861872 | 0.595132 |
| NOC4L     | 1.96402  | 0.390142 | 9.887096 | 0.413046 |
| USP18     | 2.965909 | 1.403413 | 6.268019 | 0.004404 |
| NDUFA6    | 1.049242 | 0.345416 | 3.187196 | 0.932425 |
| CHRM5     | 1.086694 | 0.128455 | 9.193138 | 0.93917  |
| SORCS2    | 0.639351 | 0.234911 | 1.740105 | 0.381246 |
| TMEM121   | 0.810928 | 0.160942 | 4.085984 | 0.799492 |
| TMEM106   | 1.067004 | 0.671783 | 1.694738 | 0.783521 |
| SIVA1     | 1.119981 | 0.640345 | 1.958877 | 0.691182 |
| BRI3BP    | 0.425539 | 0.165849 | 1.09186  | 0.075541 |
| DGAT1     | 1.723819 | 0.884467 | 3.359709 | 0.109737 |
| ROBO2     | 3.290001 | 0.217045 | 49.87029 | 0.390569 |
| AP3M1     | 1.437485 | 0.422662 | 4.888932 | 0.561201 |
| F8        | 1.183181 | 0.01717  | 81.53308 | 0.937918 |
| CA13      | 4.323075 | 0.639357 | 29.2309  | 0.133285 |
| UBOX5     | 1.844892 | 0.167163 | 20.36114 | 0.617158 |
| MAFF      | 1.248412 | 0.688727 | 2.262917 | 0.464701 |
| BRF1      | 1.205529 | 0.158348 | 9.177879 | 0.856775 |
| SEMA4B    | 1.376499 | 0.526147 | 3.601177 | 0.514902 |
| CIB1      | 0.77359  | 0.312059 | 1.917719 | 0.579428 |
| SLC24A3   | 1.344036 | 0.98218  | 1.839208 | 0.064659 |
| INTS5     | 1.496707 | 0.736821 | 3.040268 | 0.264721 |
| RPS27L    | 0.449734 | 0.153688 | 1.31605  | 0.144661 |
| MANEAL    | 0.279651 | 0.050752 | 1.540932 | 0.143362 |
| ANO9      | 0.793278 | 0.142423 | 4.418462 | 0.791553 |
| FAF1      | 0.351011 | 0.141505 | 0.870705 | 0.023905 |
| FAM43A    | 2.172599 | 1.531183 | 3.082705 | 1.38E-05 |
| HSF1      | 0.984427 | 0.494924 | 1.958071 | 0.964317 |
| PURA      | 1.407737 | 0.582122 | 3.404312 | 0.44783  |
| INPP5J    | 1.518904 | 0.308385 | 7.481119 | 0.607373 |
| MIXL1     | 2.060961 | 0.118128 | 35.95724 | 0.62008  |
| MFSD6L    | 0.494105 | 0.133968 | 1.822378 | 0.289727 |

|           |          |          |          |          |
|-----------|----------|----------|----------|----------|
| LRR37B    | 0.094861 | 0.009641 | 0.933371 | 0.04348  |
| DDX51     | 0.800361 | 0.342642 | 1.869525 | 0.606919 |
| NOMO2     | 1.182188 | 0.285649 | 4.892597 | 0.817353 |
| SIGIRR    | 3.10989  | 1.147457 | 8.428561 | 0.025724 |
| NRBP2     | 1.789928 | 1.057026 | 3.030995 | 0.030286 |
| IFITM2    | 1.753826 | 1.178994 | 2.608926 | 0.005561 |
| TNFAIP2   | 1.61515  | 1.148884 | 2.270647 | 0.005806 |
| ZNF445    | 0.597407 | 0.10688  | 3.339206 | 0.557389 |
| PGBD2     | 1.511255 | 0.381625 | 5.984656 | 0.556479 |
| RAB11B    | 1.271046 | 0.460061 | 3.511614 | 0.643674 |
| PRMT3     | 0.446433 | 0.245508 | 0.811795 | 0.008208 |
| GP1BA     | 0.824014 | 0.350846 | 1.935318 | 0.656804 |
| PRPF39    | 0.656278 | 0.20592  | 2.091595 | 0.476357 |
| PPIL6     | 0.849593 | 0.2107   | 3.425763 | 0.818774 |
| ZNF74     | 0.39363  | 0.130125 | 1.190732 | 0.098766 |
| CDNF      | 0.029987 | 0.001732 | 0.519235 | 0.015934 |
| KLHL33    | 0.360257 | 0.024473 | 5.303149 | 0.45683  |
| RBM11     | 0.076758 | 0.003319 | 1.774986 | 0.109176 |
| GALNT17   | 0.385378 | 0.03665  | 4.052301 | 0.42701  |
| ZBTB37    | 1.178043 | 0.081781 | 16.96947 | 0.904174 |
| IL3RA     | 1.663093 | 1.062306 | 2.603656 | 0.026131 |
| CCDC137   | 0.782308 | 0.287179 | 2.131097 | 0.631118 |
| RGPD2     | 0.994999 | 0.326021 | 3.036683 | 0.992974 |
| ARL15     | 2.368179 | 0.396484 | 14.14503 | 0.344435 |
| CDK10     | 0.595586 | 0.136049 | 2.607319 | 0.491531 |
| TMEM105   | 1.513312 | 0.747014 | 3.06569  | 0.250058 |
| SOCS1     | 1.96324  | 1.35797  | 2.838289 | 0.000335 |
| TCN2      | 1.525677 | 0.986379 | 2.359835 | 0.057652 |
| GAS2L1    | 2.526616 | 0.81681  | 7.815513 | 0.10767  |
| ATP6V0A2  | 0.422772 | 0.237151 | 0.753682 | 0.003516 |
| HGS       | 0.734608 | 0.325498 | 1.657919 | 0.457704 |
| TNFAIP8L1 | 1.435357 | 0.935332 | 2.202693 | 0.098126 |
| MAPK11    | 2.669756 | 1.006861 | 7.079028 | 0.048415 |
| SP140L    | 0.314803 | 0.089954 | 1.101681 | 0.070537 |
| MRPL30    | 1.373438 | 0.632394 | 2.982841 | 0.422604 |
| SMYD3     | 0.768634 | 0.533609 | 1.107174 | 0.1576   |
| METTL7A   | 1.067828 | 0.696522 | 1.63707  | 0.763391 |
| FAM174B   | 1.086186 | 0.782226 | 1.508261 | 0.621601 |
| TMEM179I  | 2.283205 | 1.048117 | 4.973703 | 0.037685 |
| GPRIN3    | 1.257246 | 0.695634 | 2.272267 | 0.448395 |
| STAC3     | 1.779362 | 0.714007 | 4.434315 | 0.216123 |
| MUC1      | 0.441879 | 0.241932 | 0.807075 | 0.007876 |
| IRF7      | 2.593639 | 1.657479 | 4.058551 | 3.02E-05 |
| BRCC3     | 0.656708 | 0.269945 | 1.597608 | 0.353885 |
| PDE6G     | 0.932346 | 0.423669 | 2.051766 | 0.86181  |
| NR2F2     | 5.643472 | 0.651271 | 48.9025  | 0.116246 |
| DLK1      | 2.087075 | 1.153741 | 3.775444 | 0.014981 |
| AHNAK2    | 0.692802 | 0.089654 | 5.353614 | 0.724998 |
| OLFML2A   | 1.543755 | 1.145389 | 2.080673 | 0.004353 |
| SP1       | 0.767147 | 0.270391 | 2.176535 | 0.618335 |
| WASH3P    | 2.336769 | 0.899145 | 6.072982 | 0.081544 |
| MRPL40    | 0.66166  | 0.36424  | 1.201937 | 0.175087 |
| PDIA2     | 2.597391 | 0.152838 | 44.14098 | 0.509005 |
| PCGF3     | 9.027309 | 1.92756  | 42.27745 | 0.005222 |
| LMLN      | 0.332589 | 0.059775 | 1.850543 | 0.208712 |
| P4HB      | 0.822332 | 0.411718 | 1.642458 | 0.57945  |
| PSMD13    | 1.464425 | 0.484194 | 4.429091 | 0.499327 |
| PBX1      | 1.43311  | 0.524452 | 3.916093 | 0.482926 |

|          |          |          |          |          |
|----------|----------|----------|----------|----------|
| NDUFA4L2 | 0.319974 | 0.026988 | 3.793714 | 0.366436 |
| ZFP36L1  | 1.161375 | 0.844234 | 1.59765  | 0.357894 |
| UBE2L3   | 0.468409 | 0.210777 | 1.040942 | 0.062677 |
| BRWD1    | 0.332235 | 0.054006 | 2.043855 | 0.234528 |
| SNAI3    | 2.619741 | 1.404458 | 4.886614 | 0.002464 |
| ZBTB3    | 2.878283 | 1.656999 | 4.999708 | 0.000175 |
| LYG2     | 0.649504 | 0.065792 | 6.41196  | 0.711831 |
| PRAME    | 0.976089 | 0.556411 | 1.712313 | 0.932743 |
| MYBL1    | 0.693043 | 0.257584 | 1.864666 | 0.467782 |
| DRG1     | 0.594117 | 0.305318 | 1.15609  | 0.125291 |
| ANKFY1   | 1.090887 | 0.383928 | 3.099632 | 0.870307 |
| YTHDF3   | 0.918179 | 0.482914 | 1.745761 | 0.794569 |
| ZNF696   | 1.193451 | 0.589848 | 2.414729 | 0.622834 |
| ADARB2   | 2.009028 | 0.346376 | 11.65263 | 0.436656 |
| IFIT1    | 3.704893 | 1.772747 | 7.742921 | 0.000497 |
| KCNQ5    | 4.213478 | 0.228765 | 77.60533 | 0.333238 |
| MORF4L1  | 0.860707 | 0.314871 | 2.352763 | 0.77001  |
| NLRP9    | 0.179577 | 0.013037 | 2.473549 | 0.199426 |
| WDR53    | 0.63721  | 0.178827 | 2.270558 | 0.486984 |
| DMWD     | 1.60684  | 0.759656 | 3.398824 | 0.214682 |
| PIGP     | 0.69192  | 0.349348 | 1.37042  | 0.290867 |
| IKZF1    | 1.029876 | 0.65902  | 1.609429 | 0.897166 |
| PCYT2    | 1.023786 | 0.36022  | 2.909716 | 0.964818 |
| NAT8L    | 3.415624 | 0.274624 | 42.48166 | 0.339525 |
| BCAP31   | 1.894252 | 0.668246 | 5.36957  | 0.229483 |
| GNB1L    | 0.859927 | 0.481033 | 1.537265 | 0.610645 |
| DNAH14   | 0.042533 | 0.001343 | 1.347421 | 0.073319 |
| EVI2B    | 1.405836 | 0.823817 | 2.399048 | 0.211589 |
| ZNF829   | 0.009474 | 4.03E-05 | 2.227864 | 0.09444  |
| THNSL1   | 1.262568 | 0.480809 | 3.315411 | 0.635983 |
| TRIM69   | 0.08964  | 0.002023 | 3.971712 | 0.212419 |
| ATP6V0C  | 1.871066 | 0.919742 | 3.806381 | 0.083797 |
| IFITM1   | 1.197206 | 0.912932 | 1.57     | 0.193139 |
| LAMP1    | 0.713245 | 0.277077 | 1.836018 | 0.483623 |
| TAS2R60  | 1.097223 | 0.072261 | 16.66054 | 0.946701 |
| KLHDC8B  | 1.345103 | 0.940786 | 1.923182 | 0.104092 |
| SETD4    | 0.566417 | 0.109925 | 2.918614 | 0.49681  |
| PTCH1    | 0.925763 | 0.115271 | 7.434959 | 0.942149 |
| RNPC3    | 0.383976 | 0.12895  | 1.143367 | 0.085558 |
| ZNF267   | 5.259976 | 0.390199 | 70.90581 | 0.210983 |
| IRS2     | 1.015898 | 0.785005 | 1.314703 | 0.904563 |
| BICD2    | 0.303709 | 0.085858 | 1.07433  | 0.064496 |
| CCIN     | 0.285349 | 0.030218 | 2.694588 | 0.273656 |
| TMLHE    | 0.649884 | 0.16813  | 2.512034 | 0.532148 |
| SDHAP3   | 13.50019 | 1.44982  | 125.7088 | 0.02224  |
| RASA3    | 1.14713  | 0.443443 | 2.967476 | 0.777133 |
| LRCH3    | 0.590997 | 0.196156 | 1.780616 | 0.349968 |
| NDUFA13  | 1.495015 | 0.787828 | 2.837    | 0.218568 |
| ZNF566   | 0.157601 | 0.010847 | 2.28988  | 0.175994 |
| ZNF529   | 0.525803 | 0.284504 | 0.97176  | 0.04023  |
| ZNF284   | 11.98716 | 0.143193 | 1003.484 | 0.27152  |
| DLEU7    | 1.340333 | 0.306122 | 5.868552 | 0.697438 |
| KRT73    | 0.754616 | 0.239952 | 2.373162 | 0.630079 |
| AIDA     | 1.211074 | 0.698587 | 2.099523 | 0.495113 |
| CD300LF  | 1.107727 | 0.809796 | 1.51527  | 0.522125 |
| CYP2R1   | 0.943721 | 0.340035 | 2.619173 | 0.911444 |
| LRRC70   | 2.460214 | 0.177239 | 34.14974 | 0.50237  |
| ANKRD46  | 1.114819 | 0.666122 | 1.865757 | 0.679111 |

|          |          |          |          |          |
|----------|----------|----------|----------|----------|
| PIP5K1C  | 1.924821 | 1.149705 | 3.222511 | 0.012755 |
| CYP4F2   | 0.552328 | 0.1586   | 1.923496 | 0.351109 |
| ZBTB6    | 1.165154 | 0.190962 | 7.109174 | 0.868431 |
| TAS2R42  | 1.266943 | 0.088892 | 18.0572  | 0.861441 |
| POLR3C   | 0.244961 | 0.110221 | 0.544412 | 0.000556 |
| WWOX     | 0.120331 | 0.008193 | 1.767324 | 0.122449 |
| BCL9L    | 2.377181 | 1.279371 | 4.417005 | 0.006156 |
| POLR1D   | 0.519714 | 0.130595 | 2.068244 | 0.353025 |
| KIF18B   | 0.08586  | 0.003461 | 2.130016 | 0.134016 |
| ZNRF1    | 0.359422 | 0.032286 | 4.001253 | 0.405283 |
| CYP4F12  | 0.091307 | 0.007379 | 1.129817 | 0.0622   |
| ZNF749   | 0.066846 | 0.005861 | 0.762403 | 0.029376 |
| BTLA     | 1.454495 | 0.547169 | 3.86637  | 0.452592 |
| ZNF17    | 1.750872 | 0.744916 | 4.1153   | 0.198937 |
| GPAT2    | 1.73999  | 0.797156 | 3.797957 | 0.164306 |
| TOR3A    | 0.730249 | 0.326171 | 1.634923 | 0.444575 |
| PPP1CC   | 0.651398 | 0.314257 | 1.350229 | 0.249093 |
| ZNF555   | 1.677192 | 0.460998 | 6.101917 | 0.432578 |
| NAP1L3   | 7.230353 | 0.996532 | 52.45992 | 0.050403 |
| PRELID2  | 0.358203 | 0.073448 | 1.746946 | 0.204116 |
| BACE1    | 2.81393  | 0.942765 | 8.398911 | 0.063692 |
| RGS9BP   | 0.074863 | 0.012751 | 0.439542 | 0.004103 |
| SLC36A3  | 0.209171 | 0.006754 | 6.478234 | 0.371725 |
| RXRA     | 1.535214 | 1.146076 | 2.056479 | 0.004052 |
| ANKRD37  | 1.530944 | 0.988043 | 2.372154 | 0.056634 |
| NUDT17   | 0.078925 | 0.007934 | 0.785124 | 0.030284 |
| ZNF75D   | 0.453473 | 0.118849 | 1.730247 | 0.247071 |
| KRT10    | 1.033002 | 0.55641  | 1.917819 | 0.918078 |
| CD300E   | 0.628834 | 0.072597 | 5.446926 | 0.673657 |
| NKRF     | 0.740282 | 0.292188 | 1.875567 | 0.526068 |
| GLDN     | 0.791218 | 0.212704 | 2.94318  | 0.726794 |
| FCAR     | 1.08736  | 0.708175 | 1.669578 | 0.701865 |
| KPNA4    | 0.606482 | 0.356511 | 1.03172  | 0.065071 |
| ZNF501   | 0.281365 | 0.018446 | 4.291778 | 0.361689 |
| ZNF197   | 0.27535  | 0.022479 | 3.372797 | 0.313016 |
| SPATA12  | 6.030019 | 0.498503 | 72.94058 | 0.157761 |
| AQP7P1   | 1.339858 | 0.285916 | 6.278835 | 0.710464 |
| RPS23    | 1.168738 | 0.703758 | 1.940934 | 0.546853 |
| GNG2     | 0.721606 | 0.453104 | 1.149217 | 0.169382 |
| BTN3A2   | 0.681107 | 0.388472 | 1.194183 | 0.180078 |
| AKAP14   | 0.001543 | 1.39E-05 | 0.170668 | 0.007011 |
| INSIG1   | 1.4964   | 0.806881 | 2.775145 | 0.200883 |
| ZNF396   | 4.252811 | 0.098297 | 183.9975 | 0.451387 |
| TMEM222  | 0.901845 | 0.360459 | 2.256357 | 0.825247 |
| ARHGAP3I | 1.297067 | 0.661402 | 2.54366  | 0.449087 |
| CYP4F3   | 0.870883 | 0.503575 | 1.506106 | 0.620843 |
| SMYD4    | 0.682664 | 0.296019 | 1.574326 | 0.370546 |
| GPATCH8  | 0.846805 | 0.180893 | 3.964117 | 0.832777 |
| CEACAM1  | 2.434704 | 0.323069 | 18.34835 | 0.387862 |
| NF2      | 0.026866 | 0.00092  | 0.784224 | 0.035626 |
| SPATC1   | 0.036321 | 0.000743 | 1.776259 | 0.094823 |
| UBE2H    | 1.202739 | 0.72518  | 1.99479  | 0.474526 |
| HPDL     | 0.741125 | 0.267965 | 2.049774 | 0.563816 |
| KATNA1   | 0.273715 | 0.093259 | 0.803348 | 0.018346 |
| ARAP1    | 1.754159 | 1.096375 | 2.806589 | 0.019095 |
| KIF24    | 0.177281 | 0.026387 | 1.191056 | 0.075065 |
| PDE2A    | 0.384645 | 0.048369 | 3.058824 | 0.366455 |
| PRG2     | 0.979497 | 0.836596 | 1.146806 | 0.796811 |



|          |          |          |          |          |
|----------|----------|----------|----------|----------|
| PRR5     | 1.49803  | 0.840801 | 2.668996 | 0.170214 |
| ZFP91    | 0.279636 | 0.10695  | 0.731146 | 0.009362 |
| BCDIN3D  | 1.946442 | 1.020685 | 3.711853 | 0.043163 |
| LYRM7    | 0.427004 | 0.230698 | 0.79035  | 0.00675  |
| BCR      | 1.137242 | 0.367747 | 3.516871 | 0.823326 |
| FSCN2    | 0.357105 | 0.015829 | 8.056221 | 0.517204 |
| SPIN4    | 1.016139 | 0.642957 | 1.605921 | 0.945339 |
| SPIN2B   | 1.388465 | 0.128561 | 14.99546 | 0.786908 |
| HYAL3    | 0.700987 | 0.505025 | 0.972985 | 0.033698 |
| CXCR3    | 2.197897 | 1.065007 | 4.535886 | 0.033144 |
| ZNF397   | 0.667397 | 0.188563 | 2.362175 | 0.530632 |
| TPCN1    | 1.020874 | 0.399526 | 2.608551 | 0.965573 |
| LILRB4   | 1.853926 | 1.118633 | 3.072539 | 0.016625 |
| TNFRSF4  | 1.746003 | 1.151746 | 2.646873 | 0.008652 |
| HEXIM1   | 0.719715 | 0.107432 | 4.821556 | 0.734667 |
| PDZD7    | 1.922505 | 0.44321  | 8.339224 | 0.382626 |
| POFUT2   | 0.470173 | 0.113424 | 1.948988 | 0.298257 |
| ERCC6L   | 1.261048 | 0.331165 | 4.801958 | 0.733861 |
| TMEM17   | 0.724763 | 0.304734 | 1.723736 | 0.466479 |
| TNFRSF18 | 2.728559 | 1.437371 | 5.17962  | 0.002145 |
| RTN4RL2  | 10.01929 | 1.29263  | 77.66035 | 0.02741  |
| ZDHHC17  | 0.665533 | 0.343374 | 1.289946 | 0.227851 |
| P2RY4    | 0.289224 | 0.021098 | 3.964876 | 0.353029 |
| ZNF395   | 0.853306 | 0.511919 | 1.422354 | 0.542843 |
| ZACN     | 2.718482 | 0.101124 | 73.08036 | 0.551504 |
| PPARA    | 0.120471 | 0.007114 | 2.039972 | 0.142626 |
| KANK3    | 0.466661 | 0.052799 | 4.124526 | 0.493024 |
| EMID1    | 0.787731 | 0.570702 | 1.087295 | 0.14678  |
| ACTL7A   | 0.021531 | 0.001162 | 0.398808 | 0.00996  |
| RHD      | 0.954011 | 0.693058 | 1.313219 | 0.772769 |
| ESPN     | 1.078051 | 0.660876 | 1.758566 | 0.763402 |
| GPR141   | 1.949377 | 0.495215 | 7.673577 | 0.339694 |
| TMPRSS6  | 1.00087  | 0.074602 | 13.42773 | 0.999476 |
| TMEM216  | 0.766179 | 0.343685 | 1.708049 | 0.514954 |
| RPS19BP1 | 1.442938 | 0.688462 | 3.024235 | 0.331437 |
| TEAD1    | 0.040571 | 0.001407 | 1.169544 | 0.061672 |
| OR2AK2   | 0.504925 | 0.02127  | 11.9864  | 0.672378 |
| PLCD1    | 1.414147 | 0.62361  | 3.206831 | 0.406807 |
| ENTPD5   | 0.350509 | 0.041291 | 2.975389 | 0.336686 |
| MITF     | 0.632055 | 0.048145 | 8.297646 | 0.726914 |
| HEATR4   | 0.150218 | 0.016201 | 1.392883 | 0.095251 |
| NAP1L1   | 0.895314 | 0.435638 | 1.84003  | 0.763515 |
| LILRA5   | 1.169194 | 0.880225 | 1.553027 | 0.280507 |
| CMC1     | 0.577259 | 0.2143   | 1.554962 | 0.277123 |
| SLIT1    | 0.371557 | 0.054253 | 2.544637 | 0.313196 |
| AKR1C1   | 0.267424 | 0.017926 | 3.989547 | 0.33882  |
| SPATA21  | 0.480704 | 0.037095 | 6.229254 | 0.575188 |
| RNF220   | 1.113698 | 0.514455 | 2.410944 | 0.78464  |
| ZNF546   | 0.559337 | 0.040059 | 7.809929 | 0.665791 |
| TSPYL4   | 0.936647 | 0.365063 | 2.403168 | 0.89171  |
| MT1X     | 1.409371 | 1.126672 | 1.763003 | 0.002663 |
| GCNT1    | 1.500708 | 0.778917 | 2.891356 | 0.225042 |
| SESTD1   | 0.928076 | 0.558635 | 1.541838 | 0.773193 |
| FNBP1    | 0.962382 | 0.493051 | 1.878463 | 0.91053  |
| DYNC2H1  | 0.703903 | 0.230441 | 2.150137 | 0.537707 |
| BCAM     | 0.054882 | 0.000957 | 3.146815 | 0.160011 |
| RSBN1L   | 1.136771 | 0.531043 | 2.433414 | 0.741313 |
| WDR86    | 1.173882 | 0.978363 | 1.408475 | 0.084592 |

|          |          |          |          |          |
|----------|----------|----------|----------|----------|
| EPOR     | 0.885834 | 0.621311 | 1.262976 | 0.502944 |
| TAF9B    | 0.04788  | 0.003839 | 0.597113 | 0.018251 |
| PCDHB13  | 0.38381  | 0.044788 | 3.28908  | 0.382287 |
| FPR3     | 2.626503 | 1.189093 | 5.801494 | 0.016926 |
| KCNJ11   | 0.369676 | 0.013876 | 9.848993 | 0.552387 |
| COL4A1   | 2.762821 | 0.661039 | 11.54725 | 0.163714 |
| GJA4     | 3.327965 | 0.81427  | 13.60158 | 0.094147 |
| PTMA     | 1.120909 | 0.755411 | 1.663251 | 0.570794 |
| HSPA14   | 0.095259 | 0.033443 | 0.271337 | 1.07E-05 |
| SIRT7    | 2.225555 | 1.021804 | 4.847403 | 0.043981 |
| IFT140   | 1.337033 | 0.640029 | 2.793089 | 0.439674 |
| TLR5     | 1.366912 | 1.009478 | 1.850907 | 0.043284 |
| USP7     | 0.803225 | 0.299087 | 2.157134 | 0.66376  |
| NANOS3   | 0.738608 | 0.49105  | 1.110971 | 0.14575  |
| NHLRC1   | 0.878132 | 0.062561 | 12.32586 | 0.923186 |
| COX8C    | 0.183768 | 0.016654 | 2.027741 | 0.166697 |
| PLEKHN1  | 0.549058 | 0.112138 | 2.688336 | 0.459442 |
| ZNF385C  | 0.647815 | 0.345129 | 1.215964 | 0.176588 |
| MAGEH1   | 0.590148 | 0.135734 | 2.565864 | 0.481858 |
| TET3     | 0.468621 | 0.037552 | 5.847993 | 0.556152 |
| ZNF286A  | 1.057368 | 0.291023 | 3.841707 | 0.932464 |
| ISG15    | 2.100096 | 1.40993  | 3.1281   | 0.000262 |
| EXD3     | 1.135377 | 0.524978 | 2.455496 | 0.746994 |
| ZKSCAN4  | 0.545894 | 0.304755 | 0.977838 | 0.041819 |
| DHRS4L2  | 1.00313  | 0.47644  | 2.112063 | 0.993435 |
| SAMD11   | 1.917617 | 0.496398 | 7.407875 | 0.345048 |
| VMAC     | 1.476046 | 0.270068 | 8.067258 | 0.653202 |
| SPRY4    | 0.036889 | 0.000122 | 11.11225 | 0.257175 |
| TRPV2    | 1.530717 | 0.925777 | 2.530948 | 0.097041 |
| TMEM203  | 2.854888 | 0.93703  | 8.698104 | 0.064959 |
| KBTBD12  | 1.108284 | 0.138464 | 8.870876 | 0.922821 |
| DNAJB13  | 0.054429 | 0.004032 | 0.734715 | 0.028371 |
| TCEA1    | 0.748564 | 0.30222  | 1.854104 | 0.531444 |
| NHEJ1    | 0.089524 | 0.008388 | 0.955445 | 0.04575  |
| FANCA    | 1.962661 | 0.046061 | 83.6283  | 0.724664 |
| SECISBP2 | 0.545386 | 0.278102 | 1.069556 | 0.077685 |
| OR52B6   | 1.608123 | 0.115596 | 22.37163 | 0.723586 |
| SEMA4D   | 1.601811 | 0.939186 | 2.731937 | 0.083697 |
| LIN28B   | 0.378941 | 0.027503 | 5.221152 | 0.468415 |
| DNAH17   | 0.293914 | 0.018598 | 4.644874 | 0.384595 |
| MCRS1    | 0.866548 | 0.275759 | 2.72305  | 0.806309 |
| TMEM72   | 0.082638 | 0.002591 | 2.635342 | 0.158121 |
| FANCM    | 0.267679 | 0.025891 | 2.767439 | 0.268787 |
| ZNF70    | 0.292568 | 0.032216 | 2.656983 | 0.274896 |
| CARD9    | 1.2187   | 0.862821 | 1.721363 | 0.261631 |
| PEAR1    | 1.704091 | 0.876157 | 3.314392 | 0.116312 |
| TMEM220  | 0.157421 | 0.029569 | 0.838083 | 0.030235 |
| EIF4EBP1 | 1.863341 | 0.694493 | 4.999386 | 0.216473 |
| P2RX2    | 0.574477 | 0.001171 | 281.9308 | 0.860813 |
| TTC24    | 0.767644 | 0.054499 | 10.81259 | 0.844662 |
| FAM122A  | 1.741926 | 0.548426 | 5.532761 | 0.346592 |
| CLEC17A  | 0.670228 | 0.094159 | 4.770707 | 0.689456 |
| LDLRAD2  | 1.704255 | 0.764018 | 3.801593 | 0.192777 |
| PMS2CL   | 0.632264 | 0.023548 | 16.97625 | 0.784783 |
| CYHR1    | 1.401145 | 0.465529 | 4.217149 | 0.548534 |
| COL14A1  | 0.157973 | 0.014342 | 1.740016 | 0.131688 |
| CPSF4L   | 0.904491 | 0.139606 | 5.860086 | 0.916143 |
| KLHL17   | 1.228189 | 0.27518  | 5.481678 | 0.787691 |

|          |          |          |          |          |
|----------|----------|----------|----------|----------|
| PLA2G2C  | 0.233156 | 0.052635 | 1.032806 | 0.05518  |
| ZSCAN23  | 1.862176 | 0.136882 | 25.33353 | 0.640623 |
| RINL     | 1.046628 | 0.631206 | 1.735456 | 0.859796 |
| MORN2    | 0.93711  | 0.435042 | 2.018596 | 0.868231 |
| S100A3   | 1.30101  | 0.293964 | 5.757931 | 0.72879  |
| UBQLN2   | 0.755098 | 0.362363 | 1.573486 | 0.453322 |
| RILPL1   | 0.792759 | 0.407121 | 1.543684 | 0.49459  |
| ZNF490   | 0.344424 | 0.048549 | 2.443453 | 0.286312 |
| CLCN1    | 1.580653 | 0.277869 | 8.991522 | 0.60573  |
| ARL4C    | 1.38462  | 0.87911  | 2.180811 | 0.160301 |
| TREML4   | 1.339475 | 0.469216 | 3.823813 | 0.58499  |
| RAB42    | 2.64423  | 0.147918 | 47.26902 | 0.508645 |
| SCGB1C1  | 0.673126 | 0.167005 | 2.713079 | 0.577826 |
| GPR89B   | 0.444253 | 0.151718 | 1.300838 | 0.138831 |
| EYS      | 0.15332  | 0.025219 | 0.932113 | 0.04172  |
| MAPK12   | 0.787549 | 0.49039  | 1.264776 | 0.323092 |
| COL4A5   | 0.977385 | 0.731423 | 1.306059 | 0.877092 |
| AGR1     | 1.21642  | 0.32101  | 4.609448 | 0.77317  |
| FAM166A  | 0.84955  | 0.111983 | 6.445034 | 0.874688 |
| ZNF626   | 0.364665 | 0.119058 | 1.116938 | 0.077341 |
| HEPACAM  | 0.955306 | 0.365489 | 2.496956 | 0.925686 |
| ZC3H6    | 0.240498 | 0.036747 | 1.574008 | 0.137092 |
| PRKAR1B  | 0.614181 | 0.288324 | 1.308314 | 0.206433 |
| DCUN1D3  | 0.999287 | 0.571736 | 1.746565 | 0.998002 |
| POTEE    | 1.795482 | 0.880631 | 3.660732 | 0.107347 |
| ZNF793   | 0.211364 | 0.010252 | 4.357774 | 0.314125 |
| COMMD6   | 2.402609 | 0.70184  | 8.224849 | 0.162692 |
| IL17REL  | 2.206105 | 0.20913  | 23.27212 | 0.510398 |
| RUFY4    | 1.390534 | 0.032458 | 59.57123 | 0.863461 |
| ZNF383   | 0.245153 | 0.062673 | 0.958941 | 0.043362 |
| HES4     | 1.11726  | 0.868187 | 1.437789 | 0.388908 |
| ZNF669   | 0.724777 | 0.316221 | 1.661189 | 0.446872 |
| CENPP    | 0.443632 | 0.114578 | 1.717698 | 0.239307 |
| PLSCR1   | 1.483684 | 0.72518  | 3.035546 | 0.280063 |
| ZNF559   | 0.336098 | 0.14447  | 0.781906 | 0.011372 |
| SBK1     | 1.229703 | 0.348809 | 4.335234 | 0.747726 |
| SLC38A3  | 0.895826 | 0.081896 | 9.799018 | 0.928185 |
| OR6N2    | 0.011767 | 0.000417 | 0.331681 | 0.009113 |
| GTF2F2   | 0.590389 | 0.235785 | 1.478295 | 0.260472 |
| PRR19    | 3.663117 | 0.354625 | 37.83836 | 0.275809 |
| ZP3      | 1.417689 | 0.485526 | 4.139518 | 0.52321  |
| PDCD1    | 2.039776 | 0.748857 | 5.556049 | 0.163231 |
| CLEC2A   | 0.421546 | 0.038189 | 4.653139 | 0.480783 |
| GPR21    | 3.272548 | 0.599031 | 17.87816 | 0.171166 |
| TCTEX1D4 | 10.21849 | 1.89769  | 55.02355 | 0.006814 |
| SELL     | 0.85206  | 0.622341 | 1.166574 | 0.3179   |
| CHM      | 0.513724 | 0.152748 | 1.727767 | 0.281783 |
| CERKL    | 0.071409 | 0.006475 | 0.78755  | 0.031165 |
| IER5L    | 2.805167 | 1.701267 | 4.625352 | 5.29E-05 |
| FAM83G   | 0.122542 | 0.009221 | 1.62843  | 0.111717 |
| HBA2     | 1.256153 | 0.758836 | 2.079394 | 0.375177 |
| DUSP28   | 0.171513 | 0.054365 | 0.541098 | 0.002633 |
| NBR1     | 1.589537 | 0.073064 | 34.58099 | 0.76805  |
| RALGAPAZ | 0.18393  | 0.023499 | 1.439653 | 0.106776 |
| NDOR1    | 0.436361 | 0.075999 | 2.505451 | 0.352384 |
| NKAIN2   | 1.099997 | 0.401229 | 3.015714 | 0.853057 |
| PAQR9    | 0.860384 | 0.463328 | 1.597703 | 0.633941 |
| CLN3     | 2.892114 | 1.26003  | 6.638195 | 0.012238 |

|          |          |          |          |          |
|----------|----------|----------|----------|----------|
| FAM72B   | 0.963574 | 0.233428 | 3.977568 | 0.959089 |
| SUMO2    | 0.660479 | 0.278127 | 1.568465 | 0.34723  |
| NANOS1   | 0.021665 | 0.000931 | 0.504408 | 0.017028 |
| HMX3     | 0.509869 | 0.04623  | 5.623324 | 0.582335 |
| DPYD     | 1.361861 | 0.929227 | 1.995921 | 0.113284 |
| S100A16  | 1.645962 | 0.888739 | 3.048353 | 0.113003 |
| PTAR1    | 0.792486 | 0.429554 | 1.462059 | 0.456674 |
| CC2D2B   | 0.663338 | 0.043014 | 10.22965 | 0.768704 |
| RHCE     | 0.922704 | 0.607317 | 1.401875 | 0.706192 |
| PARVB    | 7.257394 | 2.501746 | 21.0532  | 0.000265 |
| SLC4A5   | 0.626004 | 0.11764  | 3.331207 | 0.582898 |
| UROS     | 0.476029 | 0.269666 | 0.84031  | 0.010467 |
| ZDHHC9   | 0.847647 | 0.277333 | 2.590773 | 0.771842 |
| QRFP     | 0.411409 | 0.026534 | 6.378762 | 0.525392 |
| TMEM120I | 0.230612 | 0.03033  | 1.753438 | 0.15637  |
| RBM34    | 1.155586 | 0.546103 | 2.445284 | 0.705338 |
| NOXA1    | 1.393791 | 0.846664 | 2.294479 | 0.191724 |
| BCL2L15  | 0.626342 | 0.212821 | 1.843354 | 0.395604 |
| FZD9     | 1.207518 | 0.707168 | 2.061888 | 0.489728 |
| SPRED3   | 0.150734 | 0.001256 | 18.09277 | 0.438561 |
| ZNF548   | 0.590159 | 0.303405 | 1.147931 | 0.120292 |
| MTF1     | 1.061181 | 0.596366 | 1.888282 | 0.839945 |
| TMCO2    | 1.225839 | 0.083433 | 18.01067 | 0.88194  |
| TMEM201  | 0.503085 | 0.078063 | 3.242169 | 0.469889 |
| NHLRC3   | 0.324065 | 0.11141  | 0.942626 | 0.0386   |
| HMX2     | 6.903505 | 0.53096  | 89.75893 | 0.139879 |
| ZDHHC11  | 2.982066 | 0.279691 | 31.79478 | 0.365546 |
| CNR2     | 0.041017 | 0.002232 | 0.753688 | 0.031527 |
| ENTPD8   | 0.010877 | 0.000191 | 0.62073  | 0.028447 |
| RPL14    | 0.673676 | 0.387741 | 1.170471 | 0.161069 |
| BEND4    | 2.692264 | 0.859717 | 8.431014 | 0.089048 |
| ZNF563   | 1.225387 | 0.258161 | 5.816419 | 0.798112 |
| TMC3     | 1.052065 | 0.116905 | 9.46789  | 0.963887 |
| FBF1     | 2.994179 | 0.113481 | 79.00102 | 0.511336 |
| KLRG2    | 0.259179 | 0.031035 | 2.164477 | 0.212438 |
| ASTL     | 0.253319 | 0.023449 | 2.736631 | 0.258118 |
| MSL1     | 0.653951 | 0.245833 | 1.739603 | 0.39486  |
| LRRK2    | 1.141573 | 0.465908 | 2.797091 | 0.772139 |
| TRMT2B   | 0.083074 | 0.010014 | 0.689137 | 0.021174 |
| FAM120AC | 0.48158  | 0.18707  | 1.239747 | 0.129895 |
| NOC2L    | 1.621817 | 0.585221 | 4.494529 | 0.352486 |
| ZNF292   | 0.264437 | 0.067044 | 1.042991 | 0.057454 |
| HUS1B    | 0.364455 | 0.114052 | 1.164622 | 0.088594 |
| KCTD21   | 1.99666  | 0.569336 | 7.002288 | 0.280097 |
| ADAT2    | 0.063459 | 0.010275 | 0.391942 | 0.002995 |
| KIR2DL4  | 1.015583 | 0.462873 | 2.228275 | 0.969234 |
| ZNF567   | 2.642912 | 0.247123 | 28.26518 | 0.421501 |
| NDUFA4   | 0.485183 | 0.129358 | 1.819771 | 0.28359  |
| ALKBH2   | 0.862618 | 0.407132 | 1.827685 | 0.699666 |
| RNFT1    | 0.605458 | 0.287261 | 1.27612  | 0.187164 |
| RELN     | 0.215654 | 0.015455 | 3.009116 | 0.253968 |
| FAM111B  | 0.0484   | 0.003507 | 0.668059 | 0.023749 |
| LITAF    | 1.170455 | 0.603468 | 2.270155 | 0.641453 |
| VSTM1    | 0.805019 | 0.628069 | 1.031822 | 0.086785 |
| TMEM120, | 1.811575 | 1.158909 | 2.831806 | 0.009133 |
| ARID2    | 0.534753 | 0.223462 | 1.279682 | 0.159718 |
| SF3B3    | 0.72426  | 0.33649  | 1.558895 | 0.409472 |
| BLOC1S3  | 0.109583 | 0.00611  | 1.965238 | 0.133292 |

|           |          |          |          |          |
|-----------|----------|----------|----------|----------|
| SP6       | 0.216122 | 0.032891 | 1.420113 | 0.110752 |
| PLAC9     | 0.49423  | 0.070518 | 3.463822 | 0.478076 |
| ZNF573    | 0.626851 | 0.331577 | 1.185068 | 0.150609 |
| ZNF527    | 0.671725 | 0.042315 | 10.66314 | 0.777878 |
| S100A13   | 0.326326 | 0.020553 | 5.181114 | 0.427286 |
| ZNF33A    | 0.299974 | 0.082193 | 1.094792 | 0.068325 |
| ZNF600    | 0.805865 | 0.369711 | 1.756555 | 0.587187 |
| BTBD8     | 0.151785 | 0.00469  | 4.91258  | 0.287919 |
| MAOA      | 0.861461 | 0.534731 | 1.387828 | 0.539928 |
| TSPYL1    | 0.854253 | 0.420237 | 1.736516 | 0.663403 |
| PNRC2     | 1.317059 | 0.593447 | 2.922998 | 0.498353 |
| FHIT      | 0.546592 | 0.263495 | 1.133848 | 0.104687 |
| ZKSCAN3   | 0.738158 | 0.25939  | 2.10061  | 0.569379 |
| RRP7A     | 0.983979 | 0.562773 | 1.720437 | 0.95482  |
| LIN54     | 0.605529 | 0.299021 | 1.226222 | 0.163477 |
| FAM53B    | 3.225734 | 1.448143 | 7.185312 | 0.004155 |
| ALG1L     | 2.58987  | 0.661749 | 10.1359  | 0.171653 |
| GSPT2     | 1.208068 | 0.644285 | 2.265188 | 0.555637 |
| CXCL17    | 5.938183 | 0.957098 | 36.84262 | 0.055764 |
| HMGB1     | 0.65201  | 0.384307 | 1.106193 | 0.112792 |
| SH2D5     | 2.464216 | 0.048734 | 124.6024 | 0.652311 |
| ZFP92     | 1.427636 | 0.443649 | 4.594052 | 0.55048  |
| NCR1      | 0.108388 | 0.010737 | 1.094109 | 0.059603 |
| BLOC1S2   | 0.091102 | 0.007334 | 1.131697 | 0.062361 |
| SYCP2     | 0.775774 | 0.153535 | 3.919794 | 0.758701 |
| IL1RAP    | 1.114799 | 0.590127 | 2.105947 | 0.737736 |
| PAX5      | 0.124225 | 0.006979 | 2.211183 | 0.155671 |
| ZNF699    | 0.379755 | 0.020352 | 7.086099 | 0.516674 |
| TDRD7     | 1.014151 | 0.593391 | 1.733262 | 0.959017 |
| KIAA0895l | 0.497792 | 0.121102 | 2.046181 | 0.333432 |
| HLA-DRB1  | 1.074266 | 0.909892 | 1.268334 | 0.397839 |
| MYT1      | 0.894516 | 0.406799 | 1.966966 | 0.781571 |
| AKR1C3    | 0.989327 | 0.767496 | 1.275273 | 0.933983 |
| SPATS2L   | 1.146946 | 0.7693   | 1.709976 | 0.501049 |
| ZNF250    | 1.725306 | 0.415043 | 7.171979 | 0.45309  |
| WDSUB1    | 0.442142 | 0.213302 | 0.916489 | 0.028203 |
| ZNF79     | 0.363009 | 0.090891 | 1.449822 | 0.151505 |
| S100A4    | 1.851619 | 1.140379 | 3.006449 | 0.012733 |
| PLEKHG4   | 1.061491 | 0.67665  | 1.665209 | 0.795055 |
| FAT4      | 5.560219 | 0.140202 | 220.5105 | 0.36089  |
| ZNF681    | 2.579936 | 0.985478 | 6.754154 | 0.053585 |
| ACADSB    | 0.658316 | 0.120155 | 3.606846 | 0.629987 |
| STK40     | 3.03364  | 0.912127 | 10.08957 | 0.070303 |
| TMEM63A   | 1.542762 | 0.889755 | 2.675023 | 0.122589 |
| CTSE      | 0.455937 | 0.20214  | 1.02839  | 0.058423 |
| SEMA4A    | 1.27092  | 0.940954 | 1.716594 | 0.118019 |
| MPHOSP1   | 0.565937 | 0.227939 | 1.405132 | 0.219858 |
| GREB1     | 6.782571 | 0.115891 | 396.9526 | 0.356525 |
| SIRPB2    | 0.483411 | 0.065944 | 3.543712 | 0.474501 |
| ZNF766    | 0.963852 | 0.298735 | 3.109816 | 0.950878 |
| RYR1      | 2.50063  | 1.044832 | 5.984835 | 0.039546 |
| SRGAP3    | 0.413684 | 0.149561 | 1.144249 | 0.08906  |
| TUBB      | 0.706164 | 0.385157 | 1.294711 | 0.260647 |
| LCOR      | 0.717793 | 0.406361 | 1.267903 | 0.253348 |
| SUPT5H    | 1.082272 | 0.472622 | 2.478327 | 0.851635 |
| XPNPEP3   | 1.372931 | 0.303839 | 6.20375  | 0.680424 |
| ZNF107    | 2.335708 | 0.163374 | 33.39282 | 0.531934 |
| PPIA      | 0.51974  | 0.250709 | 1.077462 | 0.078512 |

|          |          |          |          |          |
|----------|----------|----------|----------|----------|
| ZNF471   | 0.410409 | 0.096012 | 1.75432  | 0.229518 |
| ZNF836   | 1.962546 | 0.417994 | 9.214444 | 0.392835 |
| ZNF493   | 0.272006 | 0.069018 | 1.071999 | 0.0628   |
| GTF2IRD2 | 0.769523 | 0.093662 | 6.322352 | 0.807379 |
| SUPT3H   | 0.739352 | 0.301973 | 1.810234 | 0.508621 |
| NIF3L1   | 0.699593 | 0.307478 | 1.591758 | 0.39436  |
| ATP2A1   | 2.483733 | 0.148749 | 41.47195 | 0.526491 |
| POM121   | 0.300228 | 0.089147 | 1.011102 | 0.05212  |
| ZBTB44   | 0.403435 | 0.1832   | 0.888431 | 0.024217 |
| GIMAP5   | 1.627583 | 1.146533 | 2.310468 | 0.006431 |
| NLGN3    | 0.026272 | 0.002875 | 0.240027 | 0.001263 |
| CD55     | 0.648144 | 0.347086 | 1.210334 | 0.173551 |
| ZNF565   | 0.478422 | 0.081828 | 2.797166 | 0.413187 |
| NTNG2    | 0.971692 | 0.54914  | 1.719389 | 0.921436 |
| WDR5     | 1.074801 | 0.193347 | 5.974735 | 0.934313 |
| LONP1    | 1.064808 | 0.541277 | 2.094707 | 0.855663 |
| TRRAP    | 0.769814 | 0.351941 | 1.683844 | 0.512402 |
| NUDT11   | 1.251514 | 0.459516 | 3.408556 | 0.660751 |
| FUT4     | 0.580164 | 0.421591 | 0.798382 | 0.000831 |
| ASB13    | 1.729943 | 0.987212 | 3.031471 | 0.055493 |
| ZNF34    | 1.115684 | 0.506247 | 2.458783 | 0.785993 |
| ZNF140   | 0.878065 | 0.259665 | 2.969202 | 0.834299 |
| INCA1    | 5.180781 | 0.743152 | 36.11709 | 0.096847 |
| PTPN1    | 1.02066  | 0.488557 | 2.132295 | 0.956616 |
| EVL      | 0.821841 | 0.548906 | 1.23049  | 0.340703 |
| THEM5    | 0.508569 | 0.068949 | 3.75121  | 0.5072   |
| EPHB4    | 1.187114 | 0.762111 | 1.849126 | 0.448119 |
| PRTN3    | 1.152792 | 0.971363 | 1.368106 | 0.103649 |
| ZNF765   | 1.458497 | 0.166441 | 12.7806  | 0.733258 |
| ZNF124   | 2.406522 | 0.526431 | 11.00115 | 0.257421 |
| XRCC6    | 0.568894 | 0.182912 | 1.769382 | 0.329904 |
| S100A5   | 0.687152 | 0.066237 | 7.128666 | 0.753252 |
| TSC22D2  | 1.580022 | 0.75159  | 3.321584 | 0.227557 |
| ASMT     | 0.647    | 0.038462 | 10.88385 | 0.7624   |
| ZNF569   | 15.40476 | 1.184047 | 200.4199 | 0.036706 |
| ARMCX4   | 1.211374 | 0.221183 | 6.634458 | 0.825084 |
| YRDC     | 0.602068 | 0.240779 | 1.505469 | 0.27789  |
| ZNF777   | 1.493822 | 0.72726  | 3.06837  | 0.274481 |
| PIK3R4   | 0.743902 | 0.275738 | 2.006941 | 0.559049 |
| ZNF775   | 1.579881 | 0.772062 | 3.232932 | 0.210618 |
| ZNF605   | 0.570351 | 0.204102 | 1.593813 | 0.284199 |
| TRAPPC2  | 0.074372 | 0.016082 | 0.343932 | 0.000881 |
| MYL6B    | 0.807816 | 0.490521 | 1.330356 | 0.401754 |
| ZNF799   | 0.563022 | 0.059066 | 5.366722 | 0.617528 |
| SIAH1    | 0.699379 | 0.212712 | 2.299499 | 0.556002 |
| IPO4     | 1.120119 | 0.578995 | 2.166975 | 0.736181 |
| NCOR2    | 3.194282 | 1.473372 | 6.925226 | 0.003265 |
| SULT1A1  | 1.814334 | 0.531007 | 6.199179 | 0.341978 |
| ARL9     | 1.239106 | 0.7348   | 2.089528 | 0.421321 |
| PRPF40A  | 1.239292 | 0.295842 | 5.191442 | 0.769107 |
| GDAP2    | 0.514935 | 0.160324 | 1.653891 | 0.264915 |
| TCEAL3   | 1.041812 | 0.687994 | 1.577588 | 0.846581 |
| ANAPC7   | 0.461471 | 0.174688 | 1.219063 | 0.118687 |
| TPK1     | 1.600784 | 0.880424 | 2.910541 | 0.122963 |
| SLC6A9   | 1.272624 | 0.527715 | 3.06903  | 0.591425 |
| AFAP1    | 20.02698 | 0.638857 | 627.8087 | 0.088185 |
| NACA     | 0.45639  | 0.09621  | 2.164965 | 0.323379 |
| MYO18A   | 1.418094 | 0.567704 | 3.542327 | 0.454545 |

|          |          |          |          |          |
|----------|----------|----------|----------|----------|
| MAN2A2   | 0.521511 | 0.267041 | 1.018473 | 0.056603 |
| MME      | 1.44883  | 0.289634 | 7.24744  | 0.651718 |
| FAM72A   | 0.521467 | 0.13379  | 2.032496 | 0.348199 |
| CACNA1H  | 0.87112  | 0.2707   | 2.803286 | 0.817021 |
| SULF2    | 1.282561 | 1.00008  | 1.644832 | 0.049926 |
| HBG2     | 0.93567  | 0.820309 | 1.067255 | 0.321968 |
| PLXNB2   | 3.048388 | 1.455657 | 6.383832 | 0.003121 |
| XRCC2    | 1.318661 | 0.568523 | 3.05857  | 0.519312 |
| MYO6     | 0.186246 | 0.017003 | 2.040131 | 0.168776 |
| HDAC2    | 0.362787 | 0.126151 | 1.043306 | 0.059931 |
| ZNF782   | 0.67034  | 0.085457 | 5.258248 | 0.703508 |
| ZNF846   | 3.809953 | 0.270486 | 53.66551 | 0.321624 |
| MMP1     | 0.735029 | 0.099525 | 5.428483 | 0.762837 |
| TCF4     | 1.560709 | 1.043152 | 2.335053 | 0.030351 |
| ZNF136   | 0.143137 | 0.018834 | 1.087835 | 0.060299 |
| ZKSCAN5  | 1.171348 | 0.155813 | 8.805796 | 0.877875 |
| ZNF502   | 0.376057 | 0.113889 | 1.241723 | 0.108553 |
| TRAPPC4  | 1.162948 | 0.496215 | 2.72553  | 0.728298 |
| TTC30B   | 2.144889 | 0.801175 | 5.742251 | 0.128822 |
| TECPR2   | 0.903102 | 0.071475 | 11.41093 | 0.937228 |
| TLR7     | 1.469356 | 1.080017 | 1.999051 | 0.014284 |
| ZFP62    | 0.875549 | 0.235257 | 3.2585   | 0.842877 |
| ERI2     | 0.483099 | 0.170147 | 1.371664 | 0.171807 |
| TOMM7    | 0.953378 | 0.291264 | 3.120645 | 0.937101 |
| HSH2D    | 0.768276 | 0.578881 | 1.019636 | 0.067954 |
| TRPV1    | 0.012982 | 0.000187 | 0.900463 | 0.044597 |
| ZNF33B   | 0.601466 | 0.330243 | 1.095439 | 0.096519 |
| ZNF512B  | 0.87385  | 0.336921 | 2.266446 | 0.781541 |
| AMZ2     | 0.530383 | 0.157719 | 1.783593 | 0.305434 |
| ZNF431   | 0.582545 | 0.284261 | 1.193825 | 0.139937 |
| NF1      | 0.190217 | 0.042521 | 0.850927 | 0.02992  |
| VKORC1L1 | 0.471927 | 0.182266 | 1.221921 | 0.12185  |
| ZNF418   | 0.301267 | 0.051951 | 1.747074 | 0.180956 |
| DAPK1    | 2.016489 | 1.335369 | 3.045022 | 0.000852 |
| HLA-DQA  | 1.096891 | 0.917176 | 1.311819 | 0.311072 |
| COL27A1  | 0.594559 | 0.026299 | 13.44145 | 0.743819 |
| GM2A     | 0.531864 | 0.218992 | 1.291729 | 0.16315  |
| S100A2   | 1.909566 | 0.155938 | 23.3839  | 0.61279  |
| ZNF700   | 0.757928 | 0.353278 | 1.62607  | 0.476672 |
| CD47     | 0.711922 | 0.38438  | 1.318572 | 0.279906 |
| TLE1     | 0.715652 | 0.445693 | 1.149128 | 0.166155 |
| MAML3    | 0.695005 | 0.27291  | 1.769929 | 0.445545 |
| STRN3    | 0.671737 | 0.381255 | 1.183538 | 0.168557 |
| ZNF239   | 0.712068 | 0.248714 | 2.038651 | 0.526899 |
| CHRNA    | 0.08504  | 0.005048 | 1.432544 | 0.087174 |
| ZSCAN16  | 0.490411 | 0.205655 | 1.16945  | 0.108069 |
| ADA      | 0.95128  | 0.683657 | 1.323666 | 0.766978 |
| ARID5A   | 1.853393 | 0.686529 | 5.003527 | 0.223336 |
| PPTC7    | 0.652603 | 0.362992 | 1.173279 | 0.153863 |
| TOMM20L  | 0.552277 | 0.081704 | 3.733098 | 0.542567 |
| RGPD4    | 5.610314 | 0.202197 | 155.6682 | 0.309074 |
| NHLRC2   | 0.284502 | 0.133799 | 0.604951 | 0.001092 |
| ZFP28    | 0.380896 | 0.039192 | 3.701865 | 0.405461 |
| CBWD3    | 0.224115 | 0.088104 | 0.570095 | 0.001691 |
| SCN8A    | 0.362695 | 0.04808  | 2.736003 | 0.325256 |
| LAMB3    | 0.141077 | 0.002657 | 7.490701 | 0.333864 |
| KPNA5    | 0.472933 | 0.157077 | 1.423918 | 0.183017 |
| ANKRD36  | 0.35645  | 0.144477 | 0.879419 | 0.025166 |

|          |          |          |          |          |
|----------|----------|----------|----------|----------|
| ARHGEF12 | 0.914602 | 0.322105 | 2.596975 | 0.866862 |
| PDLIM7   | 1.82259  | 0.830162 | 4.001429 | 0.13464  |
| FLNA     | 1.833373 | 1.167878 | 2.878088 | 0.008428 |
| RPS26P11 | 1.827    | 0.75135  | 4.442575 | 0.183726 |
| SRGAP1   | 1.093464 | 0.356245 | 3.356297 | 0.875913 |
| FAM3C    | 0.760226 | 0.22865  | 2.527639 | 0.654715 |
| SLC39A10 | 1.242716 | 0.761863 | 2.02706  | 0.384056 |
| CASP4    | 0.296023 | 0.048856 | 1.793632 | 0.185386 |
| AP2A1    | 3.150661 | 1.270551 | 7.812883 | 0.013259 |
| ZNF585A  | 0.521049 | 0.16934  | 1.60324  | 0.255611 |
| FUT11    | 1.459806 | 0.377373 | 5.64702  | 0.583634 |
| ANXA4    | 0.92606  | 0.586509 | 1.46219  | 0.741684 |
| LAGE3    | 0.96994  | 0.526071 | 1.78832  | 0.922108 |
| WDR5B    | 1.01425  | 0.468623 | 2.195161 | 0.971348 |
| WDR45    | 1.131016 | 0.245559 | 5.209323 | 0.874465 |
| METTL9   | 1.106484 | 0.4617   | 2.651738 | 0.820496 |
| ZNF138   | 3.65067  | 0.676076 | 19.71286 | 0.132323 |
| ZNF429   | 0.214802 | 0.038531 | 1.197469 | 0.079362 |
| ZNF470   | 2.005295 | 0.377312 | 10.65752 | 0.414288 |
| SERTAD1  | 1.624106 | 1.054791 | 2.500704 | 0.027652 |
| ZNF100   | 1.772788 | 0.037817 | 83.10551 | 0.770546 |
| ZNF398   | 0.984569 | 0.171602 | 5.64899  | 0.98608  |
| ANXA6    | 2.176823 | 0.979735 | 4.83657  | 0.056172 |
| ZNF441   | 1.26706  | 0.143822 | 11.16272 | 0.831162 |
| GMFB     | 1.105879 | 0.599848 | 2.038798 | 0.747107 |
| SIGLEC15 | 7.146597 | 0.358271 | 142.5565 | 0.197813 |
| ZNF420   | 2.781925 | 0.886428 | 8.730668 | 0.079539 |
| ZNF763   | 1.263568 | 0.330129 | 4.836306 | 0.732644 |
| ZMYM1    | 0.687972 | 0.310833 | 1.522701 | 0.356189 |
| MAFG     | 4.769615 | 1.442468 | 15.77104 | 0.010456 |
| ARRDC1   | 2.909452 | 1.431855 | 5.911852 | 0.003154 |
| KIAA1671 | 2.086667 | 0.965494 | 4.509793 | 0.061392 |
| IGF2R    | 1.165035 | 0.91228  | 1.487817 | 0.220882 |
| GAL3ST4  | 0.384541 | 0.115163 | 1.284017 | 0.120285 |
| DYNC1H1  | 1.56947  | 0.699984 | 3.51899  | 0.273904 |
| PCBP2    | 1.042347 | 0.203332 | 5.343425 | 0.960332 |
| ZGPAT    | 1.419219 | 0.227642 | 8.848042 | 0.707696 |
| SLC25A29 | 0.757307 | 0.476286 | 1.204139 | 0.24005  |
| PGAP1    | 0.318904 | 0.057438 | 1.770611 | 0.191306 |
| SRC      | 6.313258 | 2.269062 | 17.56551 | 0.000417 |
| ZNF682   | 0.741602 | 0.259552 | 2.118937 | 0.576782 |
| ZNF772   | 5.95931  | 1.686987 | 21.05137 | 0.005569 |
| ZNF257   | 1.628937 | 0.166679 | 15.91939 | 0.674843 |
| ADAM32   | 0.074827 | 0.000333 | 16.80736 | 0.347992 |
| ACSL5    | 0.613998 | 0.134342 | 2.806215 | 0.529275 |
| LRR8B    | 2.521828 | 0.172473 | 36.87301 | 0.499143 |
| ABCB8    | 2.084575 | 0.657539 | 6.608655 | 0.212108 |
| SND1     | 2.183287 | 1.033536 | 4.612072 | 0.040716 |
| ZNF785   | 2.821931 | 0.861521 | 9.24329  | 0.086577 |
| SULT1A2  | 2.107613 | 0.917559 | 4.841139 | 0.078887 |
| NEK5     | 0.17814  | 0.013012 | 2.438913 | 0.196294 |
| PSMD12   | 0.027979 | 0.001536 | 0.509478 | 0.015717 |
| PIWIL2   | 0.803692 | 0.012012 | 53.77327 | 0.918834 |
| SLC22A4  | 0.959528 | 0.590313 | 1.559671 | 0.867618 |
| ENTPD4   | 1.111919 | 0.493767 | 2.503941 | 0.797844 |
| C1D      | 1.643903 | 0.514254 | 5.255023 | 0.401839 |
| TBC1D9B  | 0.986543 | 0.472064 | 2.061725 | 0.971262 |
| SERPINA1 | 1.243605 | 0.935805 | 1.652645 | 0.132927 |



|         |          |          |          |          |
|---------|----------|----------|----------|----------|
| TPSB2   | 1.211976 | 0.993185 | 1.478966 | 0.058406 |
| KANK2   | 1.611721 | 0.693488 | 3.745763 | 0.267302 |
| GTF2E2  | 0.264447 | 0.111659 | 0.626301 | 0.002497 |
| IL27    | 3.049602 | 0.43168  | 21.54389 | 0.263654 |
| GUCA2A  | 0.727123 | 0.139475 | 3.790706 | 0.705249 |
| ZNF165  | 0.488041 | 0.229985 | 1.035653 | 0.061664 |
| SYNGAP1 | 0.785181 | 0.120742 | 5.105999 | 0.800137 |
| FITM2   | 3.466271 | 0.069187 | 173.6591 | 0.533627 |
| BLM     | 0.471095 | 0.193778 | 1.145282 | 0.096778 |
| ZNF720  | 0.80243  | 0.105465 | 6.105298 | 0.831644 |
| DDI2    | 0.024304 | 0.001    | 0.59058  | 0.022401 |
| SVIL    | 1.862147 | 0.653563 | 5.305675 | 0.244499 |
| TRIM33  | 0.259981 | 0.080233 | 0.842425 | 0.024715 |
| LRP10   | 1.448635 | 0.881672 | 2.380186 | 0.143499 |
| PELI1   | 1.100301 | 0.806383 | 1.501348 | 0.546636 |
| ZNF655  | 0.35461  | 0.063179 | 1.990341 | 0.238827 |
| MRPL21  | 1.88771  | 0.612335 | 5.819449 | 0.268684 |
| LYPD2   | 1.756257 | 0.878618 | 3.510557 | 0.11099  |
| UAP1L1  | 1.420958 | 0.833364 | 2.422855 | 0.1969   |
| FBXL22  | 9.949526 | 0.829122 | 119.3951 | 0.069961 |
| ZNF786  | 0.731706 | 0.342563 | 1.562902 | 0.41982  |
| ZNF517  | 0.873151 | 0.05657  | 13.47706 | 0.922608 |
| ZNF675  | 0.640824 | 0.117505 | 3.494781 | 0.607128 |
| SLC22A5 | 1.723883 | 0.888885 | 3.343261 | 0.107087 |
| DACT3   | 1.251381 | 0.442339 | 3.54017  | 0.672556 |
| ADARB1  | 0.4597   | 0.149879 | 1.409963 | 0.174103 |
| HTT     | 1.089533 | 0.497037 | 2.388315 | 0.830439 |
| OR6N1   | 7.032605 | 0.497966 | 99.31917 | 0.148779 |
| C5AR1   | 1.180938 | 0.960056 | 1.452638 | 0.115456 |
| VEPH1   | 1.380615 | 0.122809 | 15.52087 | 0.793897 |
| SHPK    | 0.373953 | 0.140909 | 0.992416 | 0.048239 |
| IPP     | 1.12093  | 0.471214 | 2.666483 | 0.796261 |
| MAP3K5  | 2.98467  | 1.425062 | 6.251135 | 0.003743 |
| CYP2F1  | 0.727327 | 0.047049 | 11.24362 | 0.81973  |
| GSTK1   | 1.254915 | 0.610039 | 2.581495 | 0.537232 |
| HNRNPAB | 0.45683  | 0.22001  | 0.948565 | 0.035587 |
| STMN3   | 0.97894  | 0.641396 | 1.494122 | 0.921406 |
| PDGFA   | 7.877556 | 0.408317 | 151.9798 | 0.171684 |
| GYPE    | 1.019986 | 0.757888 | 1.372725 | 0.8961   |
| SPN     | 0.667262 | 0.277556 | 1.604141 | 0.365999 |
| ZNF695  | 2.347825 | 0.207219 | 26.60123 | 0.49075  |
| ZNF628  | 2.012751 | 0.760736 | 5.325321 | 0.15881  |
| SLC2A10 | 1.189553 | 0.361461 | 3.914773 | 0.775181 |
| ZNF665  | 3.038352 | 0.417159 | 22.12964 | 0.272656 |
| RPF2    | 0.494179 | 0.222844 | 1.095891 | 0.082808 |
| SLC28A3 | 0.971694 | 0.155255 | 6.081556 | 0.975519 |
| FAM177B | 16.37313 | 1.694392 | 158.2157 | 0.015709 |
| MIB2    | 2.366011 | 0.906969 | 6.17222  | 0.078346 |
| MYO5A   | 0.670292 | 0.367753 | 1.221722 | 0.191512 |
| GZMM    | 1.234504 | 0.820359 | 1.857725 | 0.312337 |
| ATG7    | 0.959458 | 0.582832 | 1.579461 | 0.87073  |
| SIPA1L1 | 0.446105 | 0.13272  | 1.499467 | 0.191887 |
| TTC30A  | 0.833292 | 0.23233  | 2.988746 | 0.779587 |
| ELANE   | 1.062834 | 0.852584 | 1.324931 | 0.587917 |
| RAB40C  | 1.305464 | 0.602034 | 2.830795 | 0.499679 |
| PIGN    | 0.253499 | 0.084672 | 0.758951 | 0.014169 |
| ZNF624  | 14.80203 | 0.968838 | 226.1471 | 0.05272  |
| HHLA3   | 0.709101 | 0.062004 | 8.109576 | 0.782172 |

|          |          |          |          |          |
|----------|----------|----------|----------|----------|
| HOXA4    | 0.854907 | 0.395201 | 1.849356 | 0.690485 |
| TOPORS   | 1.208106 | 0.478735 | 3.048699 | 0.688939 |
| BCO2     | 0.114794 | 0.007625 | 1.728282 | 0.117696 |
| ENTPD6   | 1.93062  | 0.727534 | 5.123187 | 0.186455 |
| KLKP1    | 0.503952 | 0.038984 | 6.514681 | 0.599729 |
| FAR1     | 0.899861 | 0.534075 | 1.51617  | 0.691805 |
| ZNF841   | 0.62242  | 0.21297  | 1.819066 | 0.386212 |
| VN1R5    | 0.288143 | 0.0271   | 3.063732 | 0.30223  |
| ZNF615   | 1.075147 | 0.465309 | 2.484247 | 0.865351 |
| CDC42SE1 | 0.668788 | 0.388362 | 1.151702 | 0.146877 |
| MPEG1    | 1.319738 | 0.895985 | 1.943903 | 0.160289 |
| SERPINB2 | 1.096044 | 0.854655 | 1.405609 | 0.469961 |
| DPP4     | 1.282552 | 0.38021  | 4.326397 | 0.688316 |
| PDCD1LG2 | 0.124846 | 0.012372 | 1.259827 | 0.07771  |
| ZNF433   | 1.473244 | 0.486429 | 4.462    | 0.493143 |
| DNAH10   | 0.848149 | 0.345358 | 2.082929 | 0.719385 |
| SPTAN1   | 1.922704 | 0.806566 | 4.583367 | 0.140226 |
| NMB      | 2.121125 | 1.093735 | 4.113584 | 0.026075 |
| KLHL14   | 2.433561 | 0.090674 | 65.31332 | 0.59622  |
| FAM114A1 | 1.887834 | 0.211318 | 16.86519 | 0.569538 |
| RPE      | 0.18467  | 0.03537  | 0.964182 | 0.045154 |
| ZNF460   | 0.256634 | 0.048237 | 1.365362 | 0.110756 |
| CR1L     | 1.67318  | 0.298882 | 9.366684 | 0.558071 |
| PHF2     | 5.054139 | 1.467223 | 17.40998 | 0.010244 |
| RPS26    | 1.324364 | 0.652241 | 2.689096 | 0.436918 |
| PSAP     | 1.237966 | 0.822258 | 1.863842 | 0.306527 |
| S100A10  | 1.185346 | 0.939005 | 1.496312 | 0.152574 |
| LHFPL5   | 1.575173 | 0.24229  | 10.24049 | 0.634274 |
| RPL37A   | 1.185956 | 0.296469 | 4.744143 | 0.809467 |
| CFD      | 1.401608 | 1.018292 | 1.929217 | 0.038344 |
| EME2     | 1.258372 | 0.10568  | 14.98387 | 0.855711 |
| KLHDC1   | 0.211036 | 0.007363 | 6.048304 | 0.363505 |
| ZNF81    | 0.089465 | 0.00849  | 0.942725 | 0.044532 |
| TAF13    | 0.421274 | 0.090141 | 1.968819 | 0.27183  |
| ZNF780A  | 0.53639  | 0.040492 | 7.105533 | 0.636564 |
| ATAD3A   | 0.790436 | 0.389871 | 1.602553 | 0.514298 |
| FAM118B  | 2.240713 | 0.650481 | 7.718591 | 0.201076 |
| ZNF461   | 2.656584 | 0.347108 | 20.33209 | 0.346735 |
| SLC9A8   | 2.191319 | 0.91901  | 5.225052 | 0.076816 |
| OCLN     | 2.22719  | 0.023966 | 206.9769 | 0.729111 |
| ZNF181   | 1.48997  | 0.619562 | 3.583196 | 0.373115 |
| ZNF44    | 0.165384 | 0.013128 | 2.083475 | 0.163891 |
| GPAA1    | 1.272823 | 0.676641 | 2.394296 | 0.454278 |
| ADAMTSL1 | 1.52081  | 0.781239 | 2.960504 | 0.217364 |
| SGTB     | 0.143883 | 0.012261 | 1.688422 | 0.122813 |
| ZNF790   | 0.923521 | 0.172471 | 4.94514  | 0.925957 |
| PRB3     | 0.160292 | 0.009455 | 2.717523 | 0.204902 |
| MYO1C    | 9.181658 | 0.642191 | 131.2738 | 0.102331 |
| NKIRAS1  | 1.518149 | 0.675794 | 3.410475 | 0.312012 |
| SLC22A12 | 0.022026 | 0.000429 | 1.129566 | 0.057523 |
| KIF13B   | 1.282841 | 0.574625 | 2.863918 | 0.54328  |
| ADH5     | 0.869868 | 0.24524  | 3.085432 | 0.829131 |
| TEAD4    | 1.454988 | 0.332247 | 6.371739 | 0.618723 |
| SPG7     | 0.227417 | 0.060167 | 0.859584 | 0.029036 |
| ZNF677   | 0.594529 | 0.04972  | 7.109057 | 0.681274 |
| ZNF823   | 1.762272 | 0.728113 | 4.265274 | 0.208976 |
| ZNF311   | 2.734815 | 0.638297 | 11.71745 | 0.175351 |
| ZNF347   | 0.11338  | 0.007602 | 1.690985 | 0.114345 |

|          |          |          |          |          |
|----------|----------|----------|----------|----------|
| PLCG2    | 0.741726 | 0.404931 | 1.358643 | 0.333295 |
| FCHSD1   | 130.6665 | 9.734468 | 1753.947 | 0.000236 |
| ZNF71    | 0.230331 | 0.047546 | 1.115808 | 0.068175 |
| S100A6   | 1.166178 | 0.805862 | 1.687599 | 0.414909 |
| RPL12    | 0.934651 | 0.315551 | 2.7684   | 0.90291  |
| DNM3     | 0.962195 | 0.332478 | 2.784602 | 0.943333 |
| ZNF121   | 0.377465 | 0.172418 | 0.826366 | 0.014809 |
| MPZL1    | 0.529321 | 0.23587  | 1.187863 | 0.122945 |
| VPS13A   | 0.159214 | 0.042896 | 0.590934 | 0.00603  |
| MBP      | 1.148373 | 0.609537 | 2.163543 | 0.668585 |
| ELOVL2   | 0.495257 | 0.041098 | 5.968128 | 0.580059 |
| LEKR1    | 0.037608 | 0.001675 | 0.844449 | 0.038785 |
| SNHG12   | 0.594392 | 0.251336 | 1.405692 | 0.236191 |
| CLEC9A   | 1.913843 | 0.903606 | 4.053529 | 0.090029 |
| KEL      | 0.725592 | 0.52363  | 1.005451 | 0.053942 |
| NOL8     | 0.610381 | 0.247492 | 1.505362 | 0.28378  |
| IRAK4    | 0.634385 | 0.283448 | 1.419822 | 0.268216 |
| MRPL42   | 0.642325 | 0.274336 | 1.503926 | 0.307815 |
| ENTPD7   | 0.575766 | 0.19816  | 1.672925 | 0.310384 |
| FCGR1B   | 1.075806 | 0.816282 | 1.417841 | 0.60392  |
| ZNF335   | 2.461717 | 0.535077 | 11.32556 | 0.247317 |
| RPS4X    | 0.858783 | 0.522762 | 1.410793 | 0.54777  |
| ZNF273   | 0.201923 | 0.038092 | 1.070385 | 0.060103 |
| ZNF84    | 0.398877 | 0.169799 | 0.937008 | 0.03492  |
| MAK16    | 0.563624 | 0.251758 | 1.261814 | 0.163194 |
| ZNF667   | 0.397252 | 0.129109 | 1.222299 | 0.107417 |
| AVPR1B   | 0.699114 | 0.06805  | 7.182383 | 0.7633   |
| SIRPA    | 1.428955 | 1.021511 | 1.998912 | 0.037138 |
| GRK6     | 1.692595 | 0.912627 | 3.139153 | 0.094947 |
| PRIM1    | 0.492195 | 0.267222 | 0.906573 | 0.022924 |
| SULT1C4  | 1.975703 | 0.842841 | 4.631247 | 0.117209 |
| CD2AP    | 0.931059 | 0.44738  | 1.93766  | 0.848505 |
| NUP62CL  | 1.173083 | 0.287226 | 4.791084 | 0.824038 |
| SFI1     | 0.721055 | 0.15554  | 3.342684 | 0.676018 |
| ZNF649   | 0.32488  | 0.077366 | 1.364249 | 0.124611 |
| ZNF248   | 0.409417 | 0.163903 | 1.022696 | 0.055887 |
| LPAR1    | 7.573875 | 2.027913 | 28.28701 | 0.002599 |
| HIBCH    | 0.343399 | 0.156471 | 0.753638 | 0.007693 |
| ZNF544   | 0.598376 | 0.245117 | 1.460743 | 0.259418 |
| TMEM229  | 2.562783 | 0.688198 | 9.543566 | 0.160643 |
| ZNF770   | 0.530096 | 0.247985 | 1.13314  | 0.101529 |
| MIER1    | 0.564098 | 0.170276 | 1.868765 | 0.348849 |
| MAN1A2   | 0.324727 | 0.070952 | 1.486176 | 0.147225 |
| SVIP     | 0.573431 | 0.050701 | 6.485515 | 0.653183 |
| ZNF251   | 1.082635 | 0.119653 | 9.795808 | 0.943674 |
| DDRKG1   | 0.45239  | 0.120273 | 1.701598 | 0.240584 |
| TFDP1    | 0.688545 | 0.394619 | 1.201398 | 0.188873 |
| CLEC4C   | 1.570755 | 0.752922 | 3.27693  | 0.228762 |
| ZNF607   | 0.032602 | 0.001971 | 0.539209 | 0.016783 |
| ZNF334   | 0.764808 | 0.130604 | 4.478659 | 0.766211 |
| HSD17B11 | 1.157951 | 0.735141 | 1.823936 | 0.526974 |
| ZXDA     | 0.856631 | 0.090633 | 8.096546 | 0.892589 |
| RPS6KL1  | 0.102861 | 0.012234 | 0.864852 | 0.036294 |
| QRICH1   | 0.236415 | 0.029411 | 1.900365 | 0.175038 |
| CSF2RA   | 1.669594 | 0.936387 | 2.976912 | 0.08235  |
| DDX42    | 0.104721 | 0.028108 | 0.390158 | 0.000772 |
| RPL23A   | 0.584219 | 0.300828 | 1.134576 | 0.112483 |
| SLC29A3  | 2.840257 | 1.522426 | 5.298818 | 0.001034 |

|          |          |          |          |          |
|----------|----------|----------|----------|----------|
| STYX     | 3.287266 | 0.263444 | 41.01873 | 0.355421 |
| UBL5     | 0.482958 | 0.161668 | 1.442758 | 0.192409 |
| HELZ     | 1.296877 | 0.494919 | 3.398314 | 0.596867 |
| TMEM116  | 1.248992 | 0.347912 | 4.483835 | 0.733147 |
| UCKL1    | 1.303605 | 0.597501 | 2.844155 | 0.505343 |
| CARD11   | 1.513483 | 0.945714 | 2.422119 | 0.08411  |
| ZNF485   | 0.530151 | 0.110981 | 2.532499 | 0.426405 |
| SDAD1    | 1.905176 | 1.004112 | 3.614831 | 0.04855  |
| HYLS1    | 1.64559  | 0.578763 | 4.678885 | 0.350174 |
| MYL4     | 0.950187 | 0.701169 | 1.287642 | 0.741754 |
| ZNF442   | 1.682407 | 0.663496 | 4.266033 | 0.273154 |
| ZNF813   | 0.453629 | 0.103993 | 1.978779 | 0.292876 |
| HOXC4    | 0.50131  | 0.085779 | 2.929772 | 0.443314 |
| PIM3     | 1.895252 | 1.122248 | 3.2007   | 0.016787 |
| ASPH     | 0.451541 | 0.083249 | 2.449142 | 0.356713 |
| SPRED2   | 1.787084 | 0.895155 | 3.567729 | 0.099771 |
| WWP2     | 0.720425 | 0.198397 | 2.616032 | 0.618215 |
| GFPT1    | 0.676557 | 0.218322 | 2.096574 | 0.49834  |
| UVRAG    | 0.891717 | 0.256879 | 3.095459 | 0.856769 |
| ZNF26    | 0.187205 | 0.068074 | 0.514816 | 0.001169 |
| ITSN2    | 3.216731 | 0.236599 | 43.73375 | 0.380237 |
| NTRK1    | 0.25503  | 0.04447  | 1.462583 | 0.1252   |
| MT1F     | 1.53624  | 1.164055 | 2.027424 | 0.00242  |
| ZNF69    | 0.792607 | 0.395453 | 1.588625 | 0.512347 |
| TXNRD1   | 1.026223 | 0.340136 | 3.096218 | 0.963356 |
| NRARP    | 5.420237 | 1.3351   | 22.00507 | 0.018067 |
| ZNF583   | 0.596182 | 0.184578 | 1.925654 | 0.387263 |
| ZNF568   | 22.4305  | 0.613548 | 820.0295 | 0.090279 |
| ZXDB     | 0.697276 | 0.257723 | 1.886499 | 0.477673 |
| ZNF480   | 1.126871 | 0.44709  | 2.840229 | 0.80008  |
| ZNF587   | 0.034869 | 0.000809 | 1.502654 | 0.080485 |
| TPM2     | 1.331669 | 0.79673  | 2.225778 | 0.274433 |
| SH3BGRL2 | 1.069343 | 0.755694 | 1.513172 | 0.705052 |
| ZNF808   | 0.061191 | 0.006108 | 0.613021 | 0.017493 |
| ANKRD35  | 1.092679 | 0.547864 | 2.179275 | 0.801327 |
| YTHDF2   | 0.663665 | 0.309303 | 1.424014 | 0.292569 |
| NBR2     | 0.375324 | 0.160918 | 0.875402 | 0.023333 |
| HLA-DRBE | 0.991426 | 0.855055 | 1.149547 | 0.909202 |
| ATL1     | 0.89781  | 0.379419 | 2.124464 | 0.806227 |
| MAFK     | 0.528865 | 0.078398 | 3.567658 | 0.513079 |
| ZNF43    | 0.931717 | 0.146909 | 5.909088 | 0.940181 |
| GPN1     | 0.568793 | 0.294126 | 1.099958 | 0.093575 |
| PLN      | 1.903639 | 0.168993 | 21.4438  | 0.602346 |
| ZNF28    | 2.603427 | 0.248892 | 27.232   | 0.424378 |
| ZNF511   | 1.552961 | 0.796093 | 3.029405 | 0.196675 |
| ZNF627   | 1.434525 | 0.826932 | 2.488553 | 0.1992   |
| KCNRG    | 0.31714  | 0.048427 | 2.076888 | 0.231028 |
| WDHD1    | 0.272306 | 0.0314   | 2.361463 | 0.237881 |
| ZNF789   | 0.08341  | 0.0215   | 0.323586 | 0.000329 |
| CTNND1   | 0.293498 | 0.025874 | 3.329289 | 0.32251  |
| SLC34A3  | 0.027805 | 0.001503 | 0.514362 | 0.016104 |
| SH2D1B   | 0.782284 | 0.286605 | 2.135232 | 0.631745 |
| ARC      | 1.367814 | 0.330258 | 5.66501  | 0.665755 |
| NUDT16   | 1.277538 | 0.558868 | 2.920377 | 0.56148  |
| TLK1     | 0.335202 | 0.14097  | 0.797051 | 0.013389 |
| LRBA     | 1.639958 | 0.646834 | 4.157883 | 0.297349 |
| MMP17    | 0.260731 | 0.00473  | 14.37093 | 0.511102 |
| BAZ1A    | 0.599546 | 0.286617 | 1.254134 | 0.174274 |

|          |          |          |          |          |
|----------|----------|----------|----------|----------|
| AKR1C4   | 0.862441 | 0.439945 | 1.690673 | 0.666533 |
| COPS8    | 0.230106 | 0.050875 | 1.040764 | 0.056382 |
| CCDC69   | 1.727713 | 0.847868 | 3.520583 | 0.132178 |
| MDM4     | 0.594038 | 0.278351 | 1.267756 | 0.178123 |
| KLHL9    | 0.876171 | 0.495599 | 1.548985 | 0.649312 |
| NCOA6    | 0.371761 | 0.158748 | 0.8706   | 0.022659 |
| STK39    | 0.508491 | 0.236495 | 1.093313 | 0.083353 |
| CALM1    | 1.16662  | 0.680796 | 1.999133 | 0.57493  |
| TTC37    | 0.653845 | 0.364159 | 1.173976 | 0.154783 |
| TUSC1    | 1.592535 | 1.04885  | 2.418046 | 0.028977 |
| PAPSS2   | 1.718207 | 1.081167 | 2.730599 | 0.022012 |
| SLC9A6   | 2.902431 | 0.521322 | 16.15912 | 0.223842 |
| EIF1AY   | 0.950945 | 0.791279 | 1.14283  | 0.59172  |
| IPO9     | 0.408433 | 0.156329 | 1.067091 | 0.067634 |
| CEP290   | 0.221424 | 0.065171 | 0.752312 | 0.01569  |
| DLL1     | 1.226303 | 0.879817 | 1.709242 | 0.228523 |
| ANKRD13f | 0.638912 | 0.161942 | 2.520716 | 0.522352 |
| UNC13B   | 2.849476 | 0.752399 | 10.7915  | 0.123259 |
| LDB1     | 0.418634 | 0.070028 | 2.502652 | 0.339858 |
| PPP1R14C | 13.97508 | 1.951723 | 100.0668 | 0.008646 |
| CTR9     | 1.294627 | 0.526171 | 3.185391 | 0.574033 |
| F5       | 1.079819 | 0.74981  | 1.555072 | 0.679851 |
| ZNF652   | 0.192661 | 0.049402 | 0.751354 | 0.017708 |
| SMURF1   | 2.654194 | 0.208709 | 33.754   | 0.451839 |
| SLC5A3   | 1.530878 | 0.239587 | 9.781767 | 0.652699 |
| GPATCH3  | 1.552059 | 0.682595 | 3.529013 | 0.294246 |
| CDC42BPE | 1.98056  | 1.023223 | 3.833594 | 0.042551 |
| PLXNB3   | 11.04616 | 1.225156 | 99.5936  | 0.032278 |
| OXCT2    | 1.137897 | 0.233132 | 5.553981 | 0.873111 |
| RPL10A   | 0.768044 | 0.250463 | 2.355207 | 0.644361 |
| RCSD1    | 1.034427 | 0.532969 | 2.007695 | 0.920313 |
| FAM169A  | 1.860104 | 0.08679  | 39.86643 | 0.691451 |
| ZNF830   | 5.140559 | 1.505879 | 17.54812 | 0.008963 |
| GRIN3A   | 7.147528 | 1.183831 | 43.1541  | 0.032039 |
| CNOT7    | 0.49271  | 0.195711 | 1.240416 | 0.13294  |
| TMEM184l | 4.504938 | 1.877353 | 10.81015 | 0.000751 |
| SCAMP5   | 2.525599 | 1.279773 | 4.984205 | 0.007558 |
| ZNF521   | 1.097743 | 0.885212 | 1.361301 | 0.395654 |
| LRIG2    | 0.357664 | 0.133468 | 0.958459 | 0.040921 |
| GK       | 0.668061 | 0.19957  | 2.236336 | 0.512883 |
| FOXJ3    | 0.641826 | 0.275937 | 1.492883 | 0.303204 |
| ZNF358   | 1.392604 | 0.904979 | 2.142973 | 0.132081 |
| SFT2D1   | 0.674602 | 0.240701 | 1.890672 | 0.454084 |
| CD247    | 0.978224 | 0.748318 | 1.278765 | 0.872043 |
| INPP5F   | 0.848478 | 0.016194 | 44.45446 | 0.935164 |
| ARHGAP1  | 0.056056 | 0.001525 | 2.06113  | 0.117183 |
| SUCNR1   | 0.65951  | 0.473838 | 0.917938 | 0.013604 |
| HMG2     | 0.334855 | 0.118678 | 0.944808 | 0.038712 |
| UBE2J1   | 0.673513 | 0.361067 | 1.256332 | 0.214027 |
| GJC2     | 1.277279 | 0.906652 | 1.799415 | 0.161648 |
| OPA1     | 0.306882 | 0.112798 | 0.834911 | 0.020706 |
| DENND4B  | 1.392561 | 0.731392 | 2.651416 | 0.313507 |
| RYR3     | 0.317038 | 0.082843 | 1.213291 | 0.093422 |
| ZNF277   | 0.818307 | 0.378956 | 1.767029 | 0.609687 |
| KTI12    | 1.552975 | 0.737    | 3.272362 | 0.247072 |
| TOX      | 0.800543 | 0.476938 | 1.343717 | 0.399845 |
| CES1     | 1.700072 | 0.896544 | 3.223765 | 0.104065 |
| CD3E     | 1.158197 | 0.780167 | 1.719401 | 0.466292 |

|          |          |          |          |          |
|----------|----------|----------|----------|----------|
| RUSC2    | 2.346255 | 1.220423 | 4.510661 | 0.010549 |
| FICD     | 0.561068 | 0.240909 | 1.306707 | 0.180314 |
| OSTC     | 0.713456 | 0.327795 | 1.552859 | 0.394839 |
| TSEN15   | 0.661975 | 0.28269  | 1.550147 | 0.34199  |
| RUNDC1   | 1.986808 | 0.928857 | 4.249747 | 0.076773 |
| CCDC152  | 0.152667 | 0.016758 | 1.390774 | 0.095447 |
| GRK5     | 2.236137 | 1.121753 | 4.457584 | 0.022232 |
| TYW1     | 0.382864 | 0.11929  | 1.228816 | 0.106605 |
| SFMBT2   | 1.611636 | 0.801918 | 3.238947 | 0.180211 |
| PNMA5    | 0.032918 | 0.001798 | 0.602629 | 0.021369 |
| ITPRIPL1 | 0.500617 | 0.025448 | 9.848098 | 0.648966 |
| SMC5     | 2.13563  | 0.415144 | 10.98634 | 0.363898 |
| PRMT6    | 0.837647 | 0.424255 | 1.653848 | 0.609753 |
| SHISA4   | 0.64624  | 0.11375  | 3.67143  | 0.622311 |
| CAPZA2   | 1.126615 | 0.630532 | 2.013001 | 0.687256 |
| TOP1     | 1.233454 | 0.329041 | 4.623762 | 0.755638 |
| PRC1     | 0.602708 | 0.387488 | 0.937466 | 0.024674 |
| MAP3K3   | 2.423101 | 0.925779 | 6.342133 | 0.071409 |
| L1CAM    | 0.447577 | 0.019238 | 10.4128  | 0.616593 |
| SREBF2   | 2.293154 | 0.335107 | 15.69219 | 0.397677 |
| RASGEF1A | 1.11146  | 0.175855 | 7.024768 | 0.910558 |
| RPL39    | 1.89083  | 0.650582 | 5.495448 | 0.241906 |
| DZIP3    | 0.101587 | 0.011861 | 0.8701   | 0.036893 |
| KIAA0753 | 0.750521 | 0.264848 | 2.126812 | 0.589187 |
| DCLRE1A  | 0.331376 | 0.149221 | 0.73589  | 0.006661 |
| ATG9A    | 2.733101 | 1.192356 | 6.264773 | 0.017518 |
| NOS1AP   | 0.149662 | 0.018097 | 1.23773  | 0.078052 |
| APRT     | 1.751968 | 0.927141 | 3.310598 | 0.084172 |
| GPRASP1  | 4.891577 | 0.775625 | 30.84934 | 0.091115 |
| TBKBP1   | 1.037592 | 0.393909 | 2.733107 | 0.940472 |
| MAGEE1   | 2.926524 | 0.510018 | 16.79262 | 0.228346 |
| ZFP2     | 0.273431 | 0.054739 | 1.365831 | 0.11409  |
| L3MBTL3  | 0.868647 | 0.137009 | 5.507297 | 0.881206 |
| MFAP3L   | 0.490637 | 0.031933 | 7.538462 | 0.609477 |
| NAGA     | 1.967755 | 1.300021 | 2.978459 | 0.001371 |
| SMG5     | 0.645347 | 0.27319  | 1.524484 | 0.318    |
| TGM2     | 1.119942 | 0.625102 | 2.006506 | 0.703393 |
| ARMCX6   | 0.908941 | 0.41202  | 2.00518  | 0.813038 |
| PJA2     | 0.707411 | 0.340805 | 1.468377 | 0.352904 |
| SGMS1    | 2.710157 | 0.711038 | 10.32989 | 0.144174 |
| OR10Z1   | 0.263597 | 0.015673 | 4.433238 | 0.354504 |
| MIR30E   | 3.18006  | 0.110112 | 91.84092 | 0.500176 |
| MIR429   | 1.627459 | 0.131741 | 20.10482 | 0.704169 |
| MIR345   | 3.242972 | 0.552783 | 19.02529 | 0.192477 |
| MIR16-2  | 1.254082 | 0.199942 | 7.865902 | 0.809033 |
| MIR340   | 0.814974 | 0.050539 | 13.14202 | 0.885322 |
| MIR339   | 5.277075 | 0.863836 | 32.23703 | 0.071633 |
| MIRLET7C | 2.42631  | 0.369687 | 15.92421 | 0.355824 |
| MIR425   | 0.131735 | 0.025365 | 0.684179 | 0.015887 |
| MIR210   | 0.233458 | 0.006992 | 7.795006 | 0.416371 |
| MIR324   | 0.560964 | 0.026552 | 11.85158 | 0.710322 |
| MIR101-2 | 2.638876 | 0.447149 | 15.57349 | 0.284017 |
| MIR26A1  | 8.695245 | 0.680166 | 111.1601 | 0.096209 |
| MIR342   | 0.218529 | 0.041412 | 1.15317  | 0.073127 |
| MIR326   | 0.329581 | 0.059168 | 1.835858 | 0.205275 |
| MIR302C  | 1.208689 | 0.807676 | 1.808807 | 0.356791 |
| MIR26B   | 2.434983 | 0.28321  | 20.9355  | 0.417532 |
| MIR148B  | 0.773456 | 0.040615 | 14.72944 | 0.864331 |

|          |          |          |          |          |
|----------|----------|----------|----------|----------|
| MIR101-1 | 0.837692 | 0.044224 | 15.86754 | 0.906058 |
| MIR373   | 0.59477  | 0.099514 | 3.554792 | 0.568955 |
| MIR302D  | 0.358802 | 0.033671 | 3.823432 | 0.395861 |
| MIRLET7G | 1.535834 | 0.102816 | 22.94174 | 0.755784 |
| MIR30D   | 0.94688  | 0.079713 | 11.24765 | 0.965519 |
| MIR126   | 1.361965 | 0.116966 | 15.85891 | 0.805176 |
| MIR374A  | 0.593161 | 0.061216 | 5.747479 | 0.652173 |
| MIR367   | 0.118664 | 0.006292 | 2.237882 | 0.154909 |
| MIR331   | 0.813196 | 0.058546 | 11.29525 | 0.877583 |
| MIRLET7I | 0.791366 | 0.118948 | 5.264999 | 0.808775 |
| SNORD11c | 0.436576 | 0.072231 | 2.638721 | 0.366576 |
| SNORD9   | 0.969522 | 0.076941 | 12.21683 | 0.980898 |
| SNORA63  | 0.301015 | 0.126442 | 0.716614 | 0.006669 |
| SNORA31  | 0.493312 | 0.241711 | 1.006812 | 0.05222  |
| SNORD10c | 0.788197 | 0.439677 | 1.412978 | 0.424187 |
| SNORD1B  | 0.109417 | 0.009726 | 1.230899 | 0.073176 |
| VTRNA1-1 | 0.726641 | 0.507781 | 1.039831 | 0.080749 |
| SNORA73I | 0.319427 | 0.138215 | 0.738223 | 0.007584 |
| SNORA70  | 0.632763 | 0.417321 | 0.959427 | 0.031162 |
| SNORA72  | 0.376412 | 0.174741 | 0.810833 | 0.012577 |
| SNORA38I | 4.516049 | 0.506477 | 40.26777 | 0.176835 |
| SNORA33  | 0.455765 | 0.25019  | 0.830256 | 0.010233 |
| RNU4-1   | 1.070786 | 0.855891 | 1.339637 | 0.549563 |
| SNORA38  | 0.536787 | 0.05575  | 5.168413 | 0.590278 |
| SNORD46  | 0.086281 | 0.020886 | 0.356436 | 0.000711 |
| SNORA74I | 1.479073 | 0.387769 | 5.641652 | 0.56662  |
| RNY1     | 1.249799 | 0.862658 | 1.81068  | 0.238442 |
| SNORA62  | 0.24611  | 0.105951 | 0.571681 | 0.001113 |
| SNORA65  | 0.422605 | 0.094325 | 1.893408 | 0.260309 |
| RNU105B  | 3.791803 | 0.378045 | 38.03192 | 0.257197 |
| SNORA16I | 0.745751 | 0.086833 | 6.40474  | 0.789174 |
| SNORA14I | 3.845554 | 0.219084 | 67.50058 | 0.35686  |
| SNORD11i | 0.778924 | 0.046475 | 13.05469 | 0.862095 |
| SNORA5C  | 0.52378  | 0.072989 | 3.758722 | 0.520133 |
| SNORD11f | 0.053723 | 0.00511  | 0.564788 | 0.014854 |
| SNORD48  | 0.371261 | 0.166283 | 0.828915 | 0.015613 |
| SNORD11d | 5.116043 | 0.467817 | 55.94901 | 0.181055 |
| SNORA23  | 0.148942 | 0.013111 | 1.691923 | 0.124581 |
| VTRNA1-2 | 0.423711 | 0.026517 | 6.770371 | 0.543642 |
| SNORD11k | 1.522909 | 0.141864 | 16.3484  | 0.728339 |
| SNORD6   | 0.656662 | 0.199936 | 2.156716 | 0.488185 |
| RNY3     | 0.175997 | 0.064437 | 0.480706 | 0.000702 |
| RNU4-2   | 1.10874  | 0.862427 | 1.425402 | 0.420642 |
| MIR146B  | 32.72699 | 1.509752 | 709.4252 | 0.026255 |
| MIR582   | 1.493853 | 0.170527 | 13.08648 | 0.716998 |
| ZNF525   | 0.639098 | 0.155891 | 2.620078 | 0.533993 |
| INF2     | 1.816473 | 0.955685 | 3.452574 | 0.068511 |
| EFCAB2   | 0.539636 | 0.183549 | 1.586533 | 0.262239 |
| CHML     | 0.33072  | 0.074157 | 1.474926 | 0.146912 |
| TATDN3   | 1.338678 | 0.455223 | 3.936661 | 0.59611  |
| CR1      | 1.06059  | 0.417733 | 2.692752 | 0.901519 |
| ECT2L    | 0.1321   | 0.014868 | 1.17365  | 0.069326 |
| GPR52    | 0.457416 | 0.012232 | 17.10569 | 0.672077 |
| FCGR3A   | 1.092733 | 0.269203 | 4.435554 | 0.901263 |
| OR6K3    | 0.131492 | 0.010776 | 1.604446 | 0.111937 |
| MSTO2P   | 0.48698  | 0.081726 | 2.90177  | 0.429455 |
| SPRN     | 1.433704 | 0.096752 | 21.24509 | 0.793383 |
| FANK1    | 0.097607 | 0.013315 | 0.715533 | 0.022062 |

|          |          |          |          |          |
|----------|----------|----------|----------|----------|
| DDO      | 0.626026 | 0.19511  | 2.008649 | 0.431045 |
| SNHG5    | 1.348223 | 0.886647 | 2.05009  | 0.162316 |
| GDI1     | 2.071356 | 0.874329 | 4.907212 | 0.097969 |
| PCMTD2   | 0.816781 | 0.449424 | 1.484413 | 0.506701 |
| SOX18    | 1.446859 | 1.153918 | 1.814168 | 0.001373 |
| LIME1    | 0.928514 | 0.700901 | 1.230042 | 0.605205 |
| SAMD13   | 0.631588 | 0.253538 | 1.573349 | 0.323761 |
| EFCAB7   | 0.870938 | 0.190868 | 3.974123 | 0.858395 |
| LCN8     | 1.977635 | 0.758304 | 5.157617 | 0.163238 |
| LIPN     | 1.369076 | 0.415164 | 4.514769 | 0.605858 |
| FOXO6    | 2.604849 | 0.076585 | 88.59701 | 0.594686 |
| SYS1     | 1.408258 | 0.558473 | 3.551095 | 0.468156 |
| INPP5B   | 0.639215 | 0.251609 | 1.623932 | 0.346838 |
| RPA4     | 0.397051 | 0.118319 | 1.332404 | 0.134819 |
| NEU4     | 0.961274 | 0.736883 | 1.253996 | 0.7709   |
| MAFB     | 1.1785   | 1.001183 | 1.387222 | 0.048362 |
| TRAF3IP1 | 0.576852 | 0.045886 | 7.251839 | 0.670129 |
| BMP2KL   | 2.883262 | 0.252152 | 32.96906 | 0.394345 |
| CHIC1    | 0.329768 | 0.006532 | 16.64742 | 0.579275 |
| GIGYF2   | 4.40207  | 0.579305 | 33.45081 | 0.152043 |
| RUFY2    | 0.00631  | 0.000289 | 0.137907 | 0.001287 |
| NHSL2    | 1.692164 | 0.400959 | 7.141428 | 0.473998 |
| GGTA1    | 9.726456 | 1.033525 | 91.53525 | 0.046724 |
| PHACTR4  | 1.174962 | 0.217504 | 6.347192 | 0.851386 |
| AGAP6    | 0.787082 | 0.327489 | 1.891662 | 0.592547 |
| TIMM23B  | 0.274995 | 0.033189 | 2.278553 | 0.231452 |
| ZDHHC18  | 1.696032 | 0.888975 | 3.235775 | 0.108958 |
| ZDBF2    | 0.609684 | 0.038329 | 9.697905 | 0.725941 |
| GGNBP1   | 7.5515   | 0.467421 | 121.9996 | 0.154385 |
| DAXX     | 0.84368  | 0.208946 | 3.4066   | 0.811335 |
| BMPR2    | 1.257652 | 0.670881 | 2.35763  | 0.474607 |
| TCEA3    | 1.109276 | 0.728494 | 1.689091 | 0.628808 |
| PFDN6    | 1.013063 | 0.543052 | 1.889868 | 0.96746  |
| RING1    | 0.681885 | 0.21077  | 2.206036 | 0.522704 |
| RXR8     | 0.521636 | 0.191143 | 1.423563 | 0.203907 |
| COL11A2  | 1.401867 | 0.026655 | 73.72783 | 0.867303 |
| HLA-DOA  | 1.150417 | 0.842408 | 1.571043 | 0.378134 |
| BRD2     | 0.681408 | 0.296338 | 1.56685  | 0.366566 |
| HLA-DMA  | 1.117141 | 0.871628 | 1.431807 | 0.381649 |
| COL5A2   | 0.129329 | 0.01192  | 1.403228 | 0.092672 |
| PSMB8    | 1.229719 | 0.592423 | 2.552585 | 0.578927 |
| TAP2     | 1.175912 | 0.592768 | 2.332731 | 0.642896 |
| SPIN3    | 0.858369 | 0.307649 | 2.394927 | 0.7705   |
| HLA-DRA  | 1.138335 | 0.910526 | 1.423142 | 0.255436 |
| NOTCH4   | 0.816355 | 0.354706 | 1.878838 | 0.633293 |
| PBX2     | 0.715916 | 0.268693 | 1.907515 | 0.503893 |
| AGER     | 19.18355 | 1.131227 | 325.3182 | 0.040822 |
| RNF5     | 2.159068 | 0.627695 | 7.426503 | 0.222043 |
| AGPAT1   | 6.708089 | 0.932189 | 48.2718  | 0.058728 |
| PRRT1    | 0.010618 | 0.000844 | 0.133555 | 0.000434 |
| FKBPL    | 1.651159 | 0.47745  | 5.710188 | 0.428274 |
| MRPL38   | 1.386608 | 0.737966 | 2.605379 | 0.309761 |
| STK19    | 0.699337 | 0.263706 | 1.854611 | 0.472338 |
| SKIV2L   | 0.504017 | 0.206901 | 1.227799 | 0.131501 |
| ZBTB12   | 0.083852 | 0.008015 | 0.877262 | 0.038519 |
| SDHD     | 0.758536 | 0.379408 | 1.516511 | 0.434288 |
| EHMT2    | 1.064655 | 0.288632 | 3.927121 | 0.925048 |
| LAYN     | 1.072039 | 0.141431 | 8.126014 | 0.946334 |



|          |          |          |          |          |
|----------|----------|----------|----------|----------|
| SLC44A4  | 0.059895 | 0.007259 | 0.494223 | 0.008936 |
| NEU1     | 2.153845 | 1.170291 | 3.96401  | 0.013693 |
| HSPA1B   | 0.995146 | 0.805544 | 1.229375 | 0.964014 |
| HSPA1A   | 1.105164 | 0.836881 | 1.459452 | 0.480928 |
| HSPA1L   | 1.171536 | 0.611849 | 2.243195 | 0.63288  |
| LSM2     | 0.715381 | 0.355283 | 1.440458 | 0.348272 |
| CARD16   | 1.733696 | 1.011518 | 2.971478 | 0.045325 |
| MBD5     | 0.373089 | 0.011699 | 11.89841 | 0.576762 |
| MSH5     | 0.184406 | 0.032768 | 1.037758 | 0.055121 |
| LY6G6C   | 0.34708  | 0.047166 | 2.554053 | 0.298732 |
| LY6G6F   | 1.159353 | 0.61418  | 2.188444 | 0.648284 |
| LY6G5C   | 2.533221 | 0.411511 | 15.59424 | 0.316151 |
| CSNK2B   | 0.918527 | 0.382427 | 2.206148 | 0.849236 |
| APOM     | 0.623354 | 0.246396 | 1.577016 | 0.318259 |
| AIF1     | 1.349028 | 0.788449 | 2.308173 | 0.274588 |
| NCR3     | 0.983316 | 0.508948 | 1.899823 | 0.960067 |
| LST1     | 1.791216 | 1.203117 | 2.666786 | 0.004097 |
| NFKBIL1  | 1.070637 | 0.227378 | 5.041217 | 0.931196 |
| MCCD1    | 0.86862  | 0.083915 | 8.991197 | 0.905971 |
| MICB     | 0.781859 | 0.398046 | 1.535759 | 0.474967 |
| ZNF551   | 0.561693 | 0.208845 | 1.510682 | 0.253178 |
| MICA     | 1.162706 | 0.324606 | 4.164702 | 0.816868 |
| ZNF805   | 0.750499 | 0.273205 | 2.061637 | 0.577741 |
| HLA-C    | 1.244323 | 0.676595 | 2.28843  | 0.481941 |
| PSORS1C3 | 1.316914 | 0.194102 | 8.934794 | 0.778093 |
| POU5F1   | 0.026482 | 0.000249 | 2.812838 | 0.127134 |
| CCHCR1   | 0.167743 | 0.031346 | 0.89765  | 0.036967 |
| DHX16    | 0.643639 | 0.200933 | 2.061736 | 0.4582   |
| MRPS18B  | 2.07363  | 0.785939 | 5.471086 | 0.140658 |
| PPP1R10  | 1.989974 | 1.214419 | 3.260817 | 0.006315 |
| ABCF1    | 0.801322 | 0.303043 | 2.118893 | 0.655275 |
| PRR3     | 0.516074 | 0.192769 | 1.381614 | 0.187975 |
| LILRB3   | 1.12493  | 0.784418 | 1.613256 | 0.522196 |
| DDR1     | 70.73612 | 6.120748 | 817.4815 | 0.000647 |
| GNL1     | 1.273882 | 0.50178  | 3.234038 | 0.610579 |
| HLA-E    | 1.493533 | 0.971482 | 2.29612  | 0.067533 |
| TRIM39   | 0.299949 | 0.047896 | 1.878443 | 0.198291 |
| ZNF468   | 4.546698 | 0.594393 | 34.77914 | 0.14461  |
| TRIM15   | 1.989958 | 1.153039 | 3.434344 | 0.013458 |
| ZNF616   | 1.245961 | 0.419213 | 3.703174 | 0.692339 |
| TRIM10   | 1.058243 | 0.679018 | 1.649262 | 0.802546 |
| RNF39    | 1.01142  | 0.082713 | 12.36772 | 0.992908 |
| PPP1R11  | 0.976796 | 0.457422 | 2.085889 | 0.951637 |
| HCG9     | 0.607742 | 0.077659 | 4.756063 | 0.635205 |
| HLA-G    | 1.623337 | 1.028703 | 2.561696 | 0.037384 |
| TBC1D8   | 1.857172 | 1.084632 | 3.179963 | 0.024069 |
| HLA-F    | 1.29275  | 0.90099  | 1.854851 | 0.163332 |
| ZFP57    | 1.407486 | 0.273961 | 7.231008 | 0.682286 |
| CBY3     | 0.280589 | 0.061503 | 1.280093 | 0.100778 |
| IL31     | 5.906015 | 0.307882 | 113.2935 | 0.23866  |
| AKT1S1   | 7.076565 | 1.784715 | 28.05925 | 0.005367 |
| GABBR1   | 1.725296 | 0.881338 | 3.377416 | 0.11152  |
| SPDYC    | 0.801202 | 0.091119 | 7.044883 | 0.841616 |
| TRIM27   | 0.948413 | 0.382152 | 2.353742 | 0.909075 |
| RANBP17  | 0.083498 | 0.004933 | 1.413219 | 0.085374 |
| TTC25    | 0.752611 | 0.401684 | 1.410121 | 0.37499  |
| ATXN2    | 0.43046  | 0.204315 | 0.906912 | 0.026626 |
| DCTN1    | 1.896917 | 0.309122 | 11.64036 | 0.489156 |

|          |          |          |          |          |
|----------|----------|----------|----------|----------|
| TCTN1    | 0.718904 | 0.388758 | 1.32942  | 0.292722 |
| ZBTB48   | 1.202132 | 0.563462 | 2.564719 | 0.63395  |
| NAT8B    | 1.12829  | 0.700117 | 1.818324 | 0.620075 |
| ZNF155   | 0.784498 | 0.03016  | 20.40544 | 0.88393  |
| FBXO48   | 0.658397 | 0.030516 | 14.20543 | 0.789707 |
| CD177    | 0.410835 | 0.12784  | 1.320281 | 0.135309 |
| ZNF783   | 0.978876 | 0.404982 | 2.366026 | 0.962184 |
| ZNF425   | 1.147383 | 0.404114 | 3.257711 | 0.796237 |
| TRIM13   | 0.658423 | 0.188414 | 2.300894 | 0.512702 |
| SPIRE2   | 0.276587 | 0.036035 | 2.12292  | 0.216457 |
| PKHD1L1  | 1.899105 | 0.189518 | 19.0304  | 0.58544  |
| SLFN12L  | 8.621698 | 0.695357 | 106.9    | 0.093521 |
| SLC35B4  | 0.952414 | 0.412473 | 2.199155 | 0.909086 |
| SYCE1L   | 2.768613 | 0.92968  | 8.245007 | 0.067399 |
| TMEM231  | 3.953186 | 0.984151 | 15.87935 | 0.052691 |
| FAM71F2  | 0.247878 | 0.018965 | 3.23982  | 0.287513 |
| CCNI2    | 1.23486  | 0.279239 | 5.460844 | 0.780918 |
| CDKL4    | 0.222272 | 0.022047 | 2.240884 | 0.202106 |
| SDHAF1   | 1.895642 | 1.027728 | 3.496508 | 0.040606 |
| PSENE1   | 1.886683 | 0.75185  | 4.734418 | 0.176259 |
| ZBTB10   | 0.135177 | 0.029516 | 0.619076 | 0.009948 |
| CCDC144A | 13.96535 | 0.776879 | 251.0441 | 0.073666 |
| LGR4     | 0.615535 | 0.098374 | 3.851456 | 0.603988 |
| PSMB10   | 1.261817 | 0.573442 | 2.776535 | 0.563304 |
| E2F4     | 0.339985 | 0.126    | 0.917381 | 0.033152 |
| PDE7A    | 0.516984 | 0.228559 | 1.16938  | 0.113142 |
| TMEM170A | 1.049785 | 0.778281 | 1.416003 | 0.750325 |
| SNX2     | 1.179116 | 0.665505 | 2.08911  | 0.57235  |
| NT5M     | 0.680561 | 0.425402 | 1.088767 | 0.108445 |
| IPO7     | 0.50198  | 0.212259 | 1.187151 | 0.116572 |
| PRR13    | 1.224829 | 0.366306 | 4.095497 | 0.741935 |
| TECPR1   | 1.461792 | 0.85942  | 2.486372 | 0.161231 |
| MT1H     | 2.237092 | 1.325223 | 3.776406 | 0.002578 |
| MT1M     | 1.261048 | 0.670524 | 2.371644 | 0.4717   |
| SAMD9    | 1.725321 | 0.954936 | 3.117207 | 0.070735 |
| ATP6AP1L | 0.241784 | 0.061769 | 0.946424 | 0.041445 |
| C2CD4B   | 0.891599 | 0.654574 | 1.214452 | 0.466794 |
| NAP1L4   | 0.79359  | 0.364825 | 1.726269 | 0.559858 |
| TMSB4X   | 1.323191 | 0.695449 | 2.517559 | 0.393493 |
| CPT1B    | 1.04225  | 0.364786 | 2.977871 | 0.938419 |
| SMN2     | 0.429131 | 0.105531 | 1.745007 | 0.237188 |
| SERF1B   | 0.664074 | 0.211533 | 2.084748 | 0.483094 |
| HMG1     | 0.226021 | 0.099345 | 0.514226 | 0.000392 |
| STAG3L1  | 0.374122 | 0.148731 | 0.941079 | 0.036708 |
| MUC19    | 0.180144 | 0.011671 | 2.780467 | 0.21961  |
| EIF3CL   | 0.695    | 0.375396 | 1.286707 | 0.246948 |
| LCMT1    | 0.395321 | 0.167749 | 0.931622 | 0.033846 |
| MFS2B    | 0.14732  | 0.029142 | 0.744732 | 0.020534 |
| LIN52    | 0.292874 | 0.099588 | 0.861302 | 0.025664 |
| DPF3     | 0.701396 | 0.084798 | 5.801541 | 0.742137 |
| ITSN1    | 1.449025 | 0.352166 | 5.962174 | 0.607323 |
| ITPR1    | 1.406339 | 0.96474  | 2.050074 | 0.076181 |
| DENND1C  | 0.924122 | 0.449211 | 1.901115 | 0.83023  |
| CRLF2    | 0.372088 | 0.056919 | 2.43241  | 0.302052 |
| CRYZL1   | 0.245335 | 0.092628 | 0.649796 | 0.004692 |
| RP9P     | 1.284564 | 0.473522 | 3.484744 | 0.622855 |
| CATSPER2 | 0.110632 | 0.010465 | 1.16961  | 0.067287 |
| ARRDC5   | 1.435327 | 0.707198 | 2.913137 | 0.316983 |

|          |          |          |          |          |
|----------|----------|----------|----------|----------|
| LOH12CR2 | 0.330959 | 0.033431 | 3.276429 | 0.344475 |
| KLRC2    | 0.578895 | 0.147081 | 2.278472 | 0.434243 |
| KLRC3    | 1.083144 | 0.26671  | 4.398796 | 0.911064 |
| RFPL3S   | 0.065479 | 0.003179 | 1.348779 | 0.077376 |
| OLIG2    | 1.208344 | 0.908954 | 1.606347 | 0.19264  |
| RNPS1    | 1.35921  | 0.483266 | 3.822842 | 0.560776 |
| HSP90AB2 | 0.410366 | 0.008044 | 20.93488 | 0.657063 |
| NYNRIN   | 1.471805 | 1.088912 | 1.989334 | 0.011936 |
| DNAJC19  | 0.290813 | 0.104474 | 0.809504 | 0.018051 |
| IFITM5   | 0.252429 | 0.011882 | 5.362575 | 0.377302 |
| DEFA1    | 1.176106 | 0.924687 | 1.495886 | 0.186208 |
| DOK6     | 6.57644  | 1.238512 | 34.92059 | 0.02703  |
| ZDHHC11  | 1.960909 | 0.157586 | 24.40036 | 0.600623 |
| TMEM191  | 13.41992 | 1.477657 | 121.8782 | 0.021064 |
| HBA1     | 1.140823 | 0.814604 | 1.59768  | 0.443264 |
| HBM      | 1.080407 | 0.928633 | 1.256987 | 0.31667  |
| ATP10A   | 0.452146 | 0.085576 | 2.388954 | 0.350001 |
| HCP5     | 1.431412 | 1.045502 | 1.959766 | 0.025249 |
| HLA-H    | 1.451929 | 0.962226 | 2.181786 | 0.072716 |
| HCG27    | 0.796551 | 0.325588 | 1.948765 | 0.618263 |
| COL6A6   | 1.87753  | 0.542391 | 6.499214 | 0.320059 |
| RAB12    | 0.578783 | 0.158833 | 2.109075 | 0.407192 |
| HLA-A    | 2.60774  | 0.735235 | 9.249163 | 0.137856 |
| LNP1     | 0.357068 | 0.050732 | 2.513157 | 0.300966 |
| VGLL3    | 0.470678 | 0.02855  | 7.759697 | 0.598179 |
| TRIM71   | 2.425479 | 0.835421 | 7.041895 | 0.10325  |
| ANKRD28  | 0.8911   | 0.547339 | 1.450761 | 0.642892 |
| COLQ     | 0.289706 | 0.03369  | 2.4912   | 0.259102 |
| METTL6   | 0.458455 | 0.168629 | 1.246408 | 0.126433 |
| SNORA2A  | 0.161472 | 0.01098  | 2.374663 | 0.18371  |
| SNORA69  | 1.296879 | 0.103805 | 16.20237 | 0.840095 |
| RNU6-1   | 1.281145 | 0.751714 | 2.183453 | 0.362407 |
| SNORA22  | 0.176325 | 0.023753 | 1.308907 | 0.08974  |
| SNORD10  | 0.158467 | 0.023426 | 1.071953 | 0.058928 |
| SNORA30  | 1.550893 | 0.156226 | 15.39609 | 0.707867 |
| SNORD37  | 1.238063 | 0.240427 | 6.375327 | 0.798426 |
| SNORA5A  | 0.511399 | 0.03338  | 7.834879 | 0.630094 |
| SNORA75  | 0.232462 | 0.095143 | 0.567976 | 0.001369 |
| SNORA70  | 0.878062 | 0.153825 | 5.012146 | 0.883671 |
| SNORD15  | 0.916383 | 0.04121  | 20.37742 | 0.955998 |
| SNORD63  | 1.138087 | 0.061918 | 20.91878 | 0.930607 |
| SNORA54  | 0.577219 | 0.086076 | 3.870771 | 0.571403 |
| SNORA36  | 1.675535 | 0.127189 | 22.07282 | 0.694788 |
| SNORD59  | 0.140771 | 0.028938 | 0.684799 | 0.015138 |
| SNORD51  | 0.171611 | 0.045294 | 0.650209 | 0.009505 |
| SNORA7B  | 0.945533 | 0.523646 | 1.707322 | 0.852634 |
| SNORA15  | 0.16871  | 0.016008 | 1.778088 | 0.138609 |
| SNORA14  | 0.166063 | 0.019418 | 1.420164 | 0.101083 |
| SNORA37  | 0.261296 | 0.025409 | 2.687104 | 0.259031 |
| SNORA2B  | 0.199147 | 0.03455  | 1.147883 | 0.070974 |
| SNORA20  | 0.211607 | 0.042775 | 1.046823 | 0.056928 |
| SNORD56  | 8.974465 | 1.050988 | 76.63366 | 0.044919 |
| SNORD15  | 0.170983 | 0.059388 | 0.492271 | 0.001062 |
| SNORA19  | 3.089488 | 0.207121 | 46.08397 | 0.413307 |
| SNORA46  | 0.019892 | 0.000951 | 0.416081 | 0.011563 |
| RNU1-3   | 0.95462  | 0.743802 | 1.225191 | 0.715284 |
| SNORA66  | 0.099765 | 0.022608 | 0.440234 | 0.002341 |
| MIR25    | 0.354987 | 0.142844 | 0.882191 | 0.025758 |

|          |          |          |          |          |
|----------|----------|----------|----------|----------|
| MIR647   | 5.980945 | 0.351905 | 101.6517 | 0.215935 |
| MIR23B   | 1.647221 | 0.136567 | 19.86819 | 0.694433 |
| MIR199B  | 0.365272 | 0.039774 | 3.354568 | 0.373372 |
| MIR30B   | 0.255093 | 0.021144 | 3.077642 | 0.282285 |
| MIR606   | 0.505892 | 0.035553 | 7.198402 | 0.614972 |
| MIR593   | 0.183367 | 0.025731 | 1.306752 | 0.090466 |
| MIR215   | 2.202657 | 0.27279  | 17.7855  | 0.458701 |
| MIR181A2 | 5.907651 | 0.516644 | 67.55196 | 0.153074 |
| MIR191   | 0.417927 | 0.019065 | 9.16157  | 0.579687 |
| MIR554   | 0.365845 | 0.01584  | 8.449466 | 0.530185 |
| MIR200A  | 0.173996 | 0.011022 | 2.746662 | 0.214154 |
| MIR491   | 2.631547 | 0.398234 | 17.38936 | 0.315234 |
| MIR149   | 1.75457  | 0.356187 | 8.642993 | 0.489517 |
| MIR604   | 0.530864 | 0.112426 | 2.506692 | 0.423944 |
| MIR181C  | 0.529658 | 0.082004 | 3.421017 | 0.504313 |
| MIR193A  | 0.743919 | 0.041958 | 13.18962 | 0.840188 |
| MIR194-1 | 0.089342 | 0.004761 | 1.676569 | 0.106412 |
| MIR128-2 | 1.286992 | 0.072867 | 22.73109 | 0.863265 |
| MIR562   | 10.3552  | 0.863989 | 124.1106 | 0.065096 |
| MIR581   | 1.620229 | 0.145393 | 18.05551 | 0.694829 |
| MIR651   | 7.868134 | 0.412524 | 150.0701 | 0.170273 |
| MIR641   | 0.502215 | 0.019111 | 13.19765 | 0.679633 |
| MIR505   | 0.29609  | 0.030635 | 2.861758 | 0.293009 |
| MIR99A   | 3.041208 | 0.198684 | 46.55097 | 0.424275 |
| MIR571   | 0.159931 | 0.039031 | 0.655313 | 0.010856 |
| MIR570   | 0.051758 | 0.002608 | 1.027376 | 0.052107 |
| MIR558   | 1.556866 | 0.079238 | 30.58924 | 0.770785 |
| MIR128-1 | 0.348039 | 0.016482 | 7.349345 | 0.497628 |
| MIR602   | 1.749721 | 0.170271 | 17.98027 | 0.637895 |
| MIR184   | 0.929975 | 0.073035 | 11.84162 | 0.9554   |
| MIR659   | 0.131801 | 0.00949  | 1.830512 | 0.131151 |
| MIR573   | 1.285014 | 0.145485 | 11.35003 | 0.821498 |
| MIR32    | 0.225978 | 0.016682 | 3.061218 | 0.263332 |
| MIR597   | 10.50404 | 0.550084 | 200.5781 | 0.118102 |
| MIR141   | 102.1489 | 4.103886 | 2542.568 | 0.00479  |
| MIR627   | 0.932563 | 0.07032  | 12.36732 | 0.95778  |
| MIR200C  | 3.655894 | 0.182778 | 73.12451 | 0.396378 |
| MIR572   | 0.876487 | 0.118271 | 6.495477 | 0.897354 |
| MIR623   | 2.554997 | 0.345127 | 18.91479 | 0.358408 |
| MIR186   | 7.760745 | 0.827009 | 72.82774 | 0.072862 |
| MIR222   | 2.902625 | 0.24155  | 34.87992 | 0.40089  |
| MIR556   | 8.861244 | 0.561844 | 139.757  | 0.121073 |
| MIR200B  | 1.237857 | 0.074542 | 20.55616 | 0.881676 |
| MIR657   | 0.13053  | 0.021008 | 0.811023 | 0.028911 |
| MIR181B2 | 4.02623  | 0.32443  | 49.96622 | 0.278396 |
| MIR590   | 0.801664 | 0.099712 | 6.445188 | 0.835332 |
| MIR575   | 2.581153 | 0.103296 | 64.4975  | 0.563625 |
| MIR553   | 0.218469 | 0.010139 | 4.707471 | 0.331532 |
| MIR199A1 | 2.380691 | 0.281585 | 20.12784 | 0.425808 |
| MIR580   | 1.847071 | 0.225405 | 15.13575 | 0.567496 |
| MIR93    | 0.354946 | 0.031551 | 3.993094 | 0.401601 |
| MIR181A1 | 0.364007 | 0.037645 | 3.519791 | 0.382692 |
| MIR617   | 0.353679 | 0.01882  | 6.646603 | 0.487407 |
| MIR626   | 0.176241 | 0.012044 | 2.578927 | 0.204809 |
| MIR586   | 0.499777 | 0.195883 | 1.275135 | 0.146677 |
| MIR551A  | 4.36447  | 0.340907 | 55.87625 | 0.257337 |
| MIR15B   | 7.61554  | 0.574839 | 100.8916 | 0.123564 |
| MIR648   | 2.61466  | 0.177556 | 38.50297 | 0.48368  |

|           |          |          |          |          |
|-----------|----------|----------|----------|----------|
| MIR26A2   | 6.045213 | 0.446571 | 81.83375 | 0.175889 |
| MIR646    | 0.612945 | 0.059682 | 6.295077 | 0.68043  |
| MIR599    | 0.292266 | 0.109887 | 0.77734  | 0.013716 |
| MIR563    | 0.466986 | 0.025799 | 8.452709 | 0.606308 |
| MIR545    | 5.32535  | 0.438453 | 64.68047 | 0.189256 |
| MIR640    | 1.334452 | 0.095934 | 18.56245 | 0.829922 |
| MIR596    | 5.314206 | 0.213893 | 132.0322 | 0.308175 |
| MIR33B    | 9.21071  | 1.151008 | 73.70682 | 0.036393 |
| MIR27B    | 1.234743 | 0.063513 | 24.00453 | 0.889232 |
| MIR221    | 0.648703 | 0.385498 | 1.091614 | 0.103134 |
| MIR610    | 3.025398 | 0.642255 | 14.2514  | 0.161508 |
| MIR302A   | 1.252253 | 0.063675 | 24.6272  | 0.882342 |
| MIR603    | 0.347651 | 0.019477 | 6.20541  | 0.472425 |
| MIR33A    | 0.380392 | 0.019673 | 7.355041 | 0.522443 |
| MIR634    | 0.532864 | 0.027535 | 10.31208 | 0.677102 |
| MIR574    | 1.282172 | 0.743949 | 2.20978  | 0.37081  |
| MIR624    | 1.497313 | 0.109766 | 20.42483 | 0.762059 |
| MIR579    | 7.683852 | 0.935856 | 63.0883  | 0.057663 |
| MIR30C1   | 2.30043  | 0.201921 | 26.20815 | 0.502139 |
| MIR569    | 3.531382 | 0.227552 | 54.80345 | 0.367149 |
| MIR629    | 0.19377  | 0.013172 | 2.850598 | 0.231568 |
| MIR620    | 8.507737 | 1.06562  | 67.92441 | 0.043391 |
| MIR638    | 0.48434  | 0.077652 | 3.020978 | 0.437618 |
| MIR589    | 1.769618 | 0.117188 | 26.72251 | 0.680285 |
| MIR181B1  | 0.085339 | 0.017163 | 0.424344 | 0.002634 |
| MIR607    | 1.191699 | 0.341008 | 4.164561 | 0.783531 |
| MIR613    | 0.340694 | 0.014711 | 7.890365 | 0.501841 |
| MIR576    | 0.177741 | 0.010582 | 2.985446 | 0.2301   |
| MIR182    | 1.046753 | 0.288701 | 3.79525  | 0.944569 |
| MIR601    | 6.148748 | 0.510435 | 74.06835 | 0.152615 |
| MIR301A   | 0.123437 | 0.006698 | 2.274662 | 0.159377 |
| MIR643    | 0.010728 | 0.000279 | 0.412904 | 0.014896 |
| MIR16-1   | 0.396368 | 0.024867 | 6.317941 | 0.51242  |
| MIR130A   | 1.230443 | 0.794702 | 1.905104 | 0.352508 |
| MIRLET7F2 | 1.452275 | 0.099333 | 21.23254 | 0.785132 |
| MIR652    | 1.618181 | 0.059055 | 44.33998 | 0.775686 |
| MIR140    | 19.05098 | 0.557768 | 650.7002 | 0.101861 |
| MIR645    | 0.396657 | 0.050621 | 3.108134 | 0.378679 |
| MIR618    | 1.312094 | 0.108354 | 15.88859 | 0.830965 |
| MIR185    | 0.423216 | 0.073915 | 2.423206 | 0.334135 |
| MIR591    | 2.077775 | 0.284085 | 15.19666 | 0.471316 |
| MIR616    | 2.289914 | 0.436152 | 12.02267 | 0.32746  |
| MIR548A3  | 12.71281 | 0.682831 | 236.6846 | 0.088335 |
| MIR106B   | 0.075373 | 0.006175 | 0.920061 | 0.042844 |
| MIR320A   | 6.916612 | 1.10911  | 43.13326 | 0.038372 |
| SNORD94   | 0.096976 | 0.009954 | 0.944797 | 0.044553 |
| SNORD96   | 0.163391 | 0.029626 | 0.901123 | 0.037574 |
| SNORA49   | 0.088759 | 0.007451 | 1.057348 | 0.055384 |
| SNORD120  | 0.692624 | 0.411662 | 1.165346 | 0.166502 |
| SNORD83   | 0.054924 | 0.005586 | 0.540036 | 0.012836 |
| SNORD101  | 0.269236 | 0.014343 | 5.053969 | 0.380461 |
| SNORD41   | 0.576364 | 0.078195 | 4.248307 | 0.588748 |
| MIR196A1  | 0.609586 | 0.04392  | 8.460636 | 0.712265 |
| GPX3      | 1.509605 | 0.842561 | 2.704737 | 0.166297 |
| GNRHR2    | 0.187647 | 0.017148 | 2.053336 | 0.170497 |
| DIO1      | 17.17115 | 0.728837 | 404.5464 | 0.077774 |
| AKR7L     | 0.314987 | 0.015764 | 6.293851 | 0.449623 |
| STK38L    | 0.476504 | 0.144419 | 1.572201 | 0.223579 |

|          |          |          |          |          |
|----------|----------|----------|----------|----------|
| SACM1L   | 1.02108  | 0.543282 | 1.919085 | 0.948334 |
| TSN      | 0.721574 | 0.386318 | 1.347774 | 0.305982 |
| MIR454   | 1.724726 | 0.10776  | 27.60472 | 0.700039 |
| MIR760   | 0.618565 | 0.056498 | 6.772367 | 0.694028 |
| MIR766   | 0.918718 | 0.048804 | 17.29464 | 0.954856 |
| MIR769   | 0.912572 | 0.057476 | 14.48928 | 0.94829  |
| MIR765   | 3.326221 | 0.215795 | 51.26978 | 0.389139 |
| SLC48A1  | 1.420521 | 0.728171 | 2.771163 | 0.303218 |
| MIR301B  | 3.8568   | 0.40484  | 36.74266 | 0.240516 |
| PRR22    | 0.354005 | 0.106751 | 1.173941 | 0.08955  |
| TAS2R19  | 0.159632 | 0.010651 | 2.39258  | 0.184047 |
| TAS2R50  | 0.089013 | 0.007205 | 1.099689 | 0.059311 |
| TAS2R14  | 0.134188 | 0.014275 | 1.261385 | 0.078944 |
| TAS2R13  | 1.379969 | 0.10293  | 18.501   | 0.807869 |
| SNORD67  | 3.741431 | 0.270659 | 51.71931 | 0.324785 |
| SNORD66  | 1.699932 | 0.112908 | 25.59394 | 0.701357 |
| SNORD91  | 0.979015 | 0.280465 | 3.417431 | 0.973474 |
| SNORD17  | 0.184296 | 0.028573 | 1.188712 | 0.075371 |
| SNORD89  | 0.775918 | 0.412498 | 1.459517 | 0.431261 |
| SNORD72  | 0.413665 | 0.029558 | 5.789277 | 0.512052 |
| SNORA74  | 0.346477 | 0.033376 | 3.59678  | 0.374646 |
| SNORA53  | 0.246152 | 0.025549 | 2.371569 | 0.225195 |
| SNORD90  | 0.843363 | 0.065875 | 10.79715 | 0.895809 |
| SNORD69  | 0.164287 | 0.038453 | 0.701897 | 0.014781 |
| SNORA12  | 1.081391 | 0.780718 | 1.497862 | 0.637822 |
| SNORD19  | 0.678651 | 0.048825 | 9.432993 | 0.772823 |
| SNORD70  | 2.004947 | 0.196306 | 20.47733 | 0.557385 |
| SNORD30  | 0.1808   | 0.056955 | 0.573941 | 0.003707 |
| RNF208   | 0.887059 | 0.044902 | 17.52411 | 0.937246 |
| PTTG3P   | 0.724362 | 0.468724 | 1.119422 | 0.146504 |
| ZNF580   | 5.179938 | 1.140374 | 23.5289  | 0.033165 |
| ZNF611   | 2.118917 | 0.345284 | 13.00325 | 0.417253 |
| NUP62    | 1.320449 | 0.571751 | 3.049558 | 0.515114 |
| DENND1B  | 0.095653 | 0.007847 | 1.165996 | 0.065828 |
| SFT2D2   | 0.89946  | 0.210945 | 3.835251 | 0.886126 |
| LPAL2    | 0.04901  | 0.000215 | 11.19008 | 0.276427 |
| ZNF254   | 0.941544 | 0.223091 | 3.973741 | 0.934657 |
| TCTEX1D2 | 0.850464 | 0.432839 | 1.671036 | 0.638339 |
| CRYGS    | 0.556012 | 0.235832 | 1.310889 | 0.179809 |
| CRIP1    | 1.487061 | 1.115168 | 1.982976 | 0.006886 |
| KLHL23   | 0.502225 | 0.157427 | 1.602207 | 0.2446   |
| FAM24B   | 1.071959 | 0.601268 | 1.911123 | 0.813785 |
| TRIM59   | 0.342128 | 0.031233 | 3.747704 | 0.379826 |
| MLLT11   | 0.836914 | 0.644791 | 1.086281 | 0.180899 |
| GIMAP1   | 1.708248 | 1.197108 | 2.437633 | 0.00316  |
| DNLZ     | 1.100958 | 0.655131 | 1.850179 | 0.716494 |
| SUPT4H1  | 0.734061 | 0.268381 | 2.007761 | 0.547024 |
| NRAS     | 0.450037 | 0.150297 | 1.347559 | 0.153616 |
| LTC4S    | 0.63633  | 0.375626 | 1.077978 | 0.092807 |
| ANKRD39  | 0.68757  | 0.226742 | 2.084977 | 0.508089 |
| QTRT1    | 1.157751 | 0.596184 | 2.248279 | 0.665323 |
| CHUK     | 0.382243 | 0.152812 | 0.95614  | 0.039798 |
| MXD3     | 1.199512 | 0.800858 | 1.796609 | 0.377468 |
| GSTM2    | 0.669425 | 0.442323 | 1.013129 | 0.057661 |
| COG8     | 2.481869 | 0.875084 | 7.038957 | 0.087435 |
| ARHGAP1  | 0.679042 | 0.347868 | 1.325499 | 0.256695 |
| LCAT     | 0.582172 | 0.22747  | 1.489975 | 0.259192 |
| PVRIG    | 1.09849  | 0.765164 | 1.577022 | 0.610641 |

|          |          |          |          |          |
|----------|----------|----------|----------|----------|
| GPC2     | 0.47441  | 0.225662 | 0.997354 | 0.049189 |
| SIPA1    | 1.707878 | 0.807424 | 3.612538 | 0.161413 |
| SYNJ2BP  | 0.764308 | 0.375698 | 1.554885 | 0.458216 |
| ARL2     | 0.690246 | 0.427488 | 1.114511 | 0.129402 |
| SRA1     | 0.909315 | 0.114628 | 7.213391 | 0.928314 |
| DNAJC9   | 0.422957 | 0.261362 | 0.684463 | 0.000459 |
| VDAC1    | 0.79141  | 0.307259 | 2.038448 | 0.627947 |
| ZBTB9    | 1.614591 | 0.943052 | 2.764327 | 0.080768 |
| HEXA     | 0.158412 | 0.047363 | 0.529828 | 0.00278  |
| NDUFS3   | 0.915003 | 0.498414 | 1.679787 | 0.774429 |
| LEPROT   | 0.647859 | 0.341412 | 1.22937  | 0.184132 |
| LBH      | 1.614228 | 0.447704 | 5.820215 | 0.46428  |
| ADAT3    | 2.333232 | 1.137892 | 4.784262 | 0.020747 |
| PPP1CB   | 0.730127 | 0.312611 | 1.705268 | 0.467373 |
| GPSM3    | 1.488024 | 0.939621 | 2.356499 | 0.09018  |
| LAT      | 0.87333  | 0.361843 | 2.10784  | 0.7632   |
| NCKIPSD  | 1.074833 | 0.233738 | 4.942569 | 0.926139 |
| ATF6B    | 1.99874  | 0.795977 | 5.018942 | 0.140425 |
| S1PR3    | 1.656145 | 1.000494 | 2.741462 | 0.049776 |
| CLIC1    | 1.332006 | 0.576743 | 3.076307 | 0.50204  |
| DDAH2    | 1.20223  | 0.721626 | 2.002919 | 0.479431 |
| RPS29    | 1.294338 | 0.324248 | 5.166756 | 0.714885 |
| UGT2B11  | 0.733107 | 0.110889 | 4.846707 | 0.747326 |
| ATP6V1G2 | 1.061516 | 0.191401 | 5.887183 | 0.945546 |
| ZNF134   | 0.347516 | 0.128105 | 0.942722 | 0.037912 |
| DDX47    | 0.613645 | 0.265999 | 1.415647 | 0.252213 |
| ZNF845   | 0.918311 | 0.364659 | 2.312556 | 0.856487 |
| KLRK1    | 6.111023 | 0.537662 | 69.45746 | 0.144402 |
| EMP2     | 0.57993  | 0.073291 | 4.588796 | 0.605668 |
| KCTD11   | 1.337298 | 0.390921 | 4.574748 | 0.643235 |
| LTB4R    | 1.103754 | 0.702442 | 1.734341 | 0.668546 |
| LTB4R2   | 1.149837 | 0.59142  | 2.235511 | 0.680634 |
| DNASE1   | 0.31806  | 0.047169 | 2.144679 | 0.239434 |
| CSNK1E   | 1.333773 | 0.597119 | 2.979219 | 0.482423 |
| IRF9     | 2.58618  | 1.429039 | 4.680298 | 0.001692 |
| GALT     | 0.248888 | 0.049519 | 1.250937 | 0.091375 |
| HBG1     | 0.941578 | 0.824237 | 1.075624 | 0.375372 |
| CLDN9    | 0.14254  | 0.018028 | 1.126969 | 0.064797 |
| KRT18P17 | 3.42293  | 0.991224 | 11.82019 | 0.051652 |
| NUDT19   | 0.322105 | 0.059677 | 1.738548 | 0.187832 |
| TAX1BP3  | 1.459815 | 0.760644 | 2.801652 | 0.255369 |
| AP1G2    | 0.703986 | 0.168338 | 2.944055 | 0.630649 |
| ZNF90    | 3.028111 | 0.185695 | 49.37915 | 0.43664  |
| MEF2B    | 0.570187 | 0.070307 | 4.624218 | 0.598849 |
| GANC     | 0.259738 | 0.026225 | 2.57249  | 0.249194 |
| TTLL3    | 0.347029 | 0.068176 | 1.766446 | 0.202419 |
| REPIN1   | 0.07004  | 0.01502  | 0.326608 | 0.000713 |
| MRPL23   | 1.596306 | 0.752388 | 3.386807 | 0.222979 |
| UCA1     | 0.243241 | 0.080453 | 0.735414 | 0.012266 |
| TSPAN4   | 1.168948 | 0.621826 | 2.197463 | 0.627871 |
| CPNE1    | 1.176479 | 0.359332 | 3.851883 | 0.788253 |
| ARL16    | 0.729148 | 0.329204 | 1.614973 | 0.436237 |
| LYRM4    | 0.86835  | 0.409377 | 1.8419   | 0.712923 |
| MYCBP    | 0.448916 | 0.153707 | 1.3111   | 0.143021 |
| PRCD     | 0.167131 | 0.009623 | 2.902666 | 0.219332 |
| ALG3     | 0.741467 | 0.353864 | 1.55363  | 0.428033 |
| FIS1     | 1.625152 | 1.010692 | 2.613178 | 0.045086 |
| MBLAC1   | 5.982116 | 0.865414 | 41.35095 | 0.069766 |

|          |          |          |          |          |
|----------|----------|----------|----------|----------|
| NEURL1B  | 1.89016  | 1.220494 | 2.927262 | 0.004334 |
| PLIN5    | 1.322941 | 0.714162 | 2.450667 | 0.37362  |
| HIGD1C   | 1.294344 | 0.091556 | 18.29847 | 0.848598 |
| PPME1    | 1.036002 | 0.429966 | 2.496241 | 0.93717  |
| STARD10  | 1.357111 | 0.725602 | 2.538237 | 0.33913  |
| MEG3     | 1.508183 | 0.953933 | 2.384459 | 0.078719 |
| IFRD2    | 0.743741 | 0.392882 | 1.407928 | 0.363214 |
| CAPN14   | 0.483796 | 0.11365  | 2.05947  | 0.32588  |
| ZBED1    | 2.470356 | 1.150528 | 5.304228 | 0.020361 |
| HNRNPUL  | 0.759492 | 0.34845  | 1.655413 | 0.48892  |
| POLR2J4  | 0.481361 | 0.006386 | 36.28122 | 0.740247 |
| MTCP1    | 1.333195 | 0.615956 | 2.885611 | 0.465416 |
| SMTNL1   | 1.234022 | 0.113215 | 13.45056 | 0.863018 |
| ZSWIM7   | 0.640081 | 0.382492 | 1.071146 | 0.089443 |
| LRRRC69  | 0.465473 | 0.03587  | 6.040242 | 0.558719 |
| PHB2     | 1.006821 | 0.496457 | 2.041842 | 0.984967 |
| NEURL4   | 1.023598 | 0.37488  | 2.794904 | 0.9637   |
| UBXN2B   | 0.913032 | 0.461345 | 1.806952 | 0.793911 |
| CBWD6    | 0.486166 | 0.023892 | 9.892621 | 0.638965 |
| FAM166B  | 1.281373 | 0.131546 | 12.48168 | 0.830957 |
| PEX26    | 0.517042 | 0.082274 | 3.2493   | 0.481822 |
| FASTKD5  | 0.73415  | 0.434515 | 1.24041  | 0.248143 |
| GOLGA8B  | 0.756349 | 0.459248 | 1.245654 | 0.272627 |
| HOMEZ    | 3.617065 | 0.288985 | 45.27279 | 0.318689 |
| DDX3X    | 0.591972 | 0.273114 | 1.28309  | 0.184048 |
| VPS16    | 0.596025 | 0.114559 | 3.100975 | 0.538564 |
| MYL5     | 0.769548 | 0.388299 | 1.525125 | 0.452908 |
| ZNF407   | 0.50267  | 0.044152 | 5.72287  | 0.579406 |
| NPEPL1   | 1.375768 | 0.822378 | 2.301541 | 0.224326 |
| SIAH3    | 5.155774 | 0.171642 | 154.8686 | 0.344772 |
| GCGR     | 0.685954 | 0.301734 | 1.559431 | 0.368342 |
| CELA2B   | 0.078292 | 0.007823 | 0.78352  | 0.030193 |
| TMEM167I | 0.541257 | 0.279209 | 1.049246 | 0.069121 |
| FAM72D   | 0.592004 | 0.267578 | 1.30978  | 0.195696 |
| TNFRSF25 | 1.353182 | 0.881929 | 2.076246 | 0.166134 |
| ZC3H11B  | 0.243005 | 0.085867 | 0.687708 | 0.007691 |
| TSTD1    | 0.931535 | 0.389012 | 2.230669 | 0.873523 |
| PDZK1P1  | 0.130667 | 0.014352 | 1.189678 | 0.070942 |
| CYB5RL   | 0.108515 | 0.015785 | 0.745968 | 0.02395  |
| TTC34    | 0.49969  | 0.018908 | 13.20571 | 0.677946 |
| MMP23A   | 2.659113 | 0.289015 | 24.46547 | 0.387741 |
| ATAD3C   | 2.181322 | 0.248183 | 19.17204 | 0.481869 |
| MIR942   | 1.780179 | 0.11782  | 26.89734 | 0.677203 |
| MIR933   | 0.329668 | 0.024952 | 4.355598 | 0.399441 |
| MIR874   | 1.090374 | 0.083785 | 14.19005 | 0.947309 |
| MIR938   | 1.417957 | 0.119618 | 16.80851 | 0.781928 |
| MIR875   | 0.182028 | 0.016451 | 2.014121 | 0.164816 |
| MIR920   | 1.572464 | 0.110516 | 22.37363 | 0.73829  |
| IFI30    | 1.25673  | 1.030092 | 1.533232 | 0.024311 |
| CCDC7    | 0.048848 | 0.00106  | 2.250998 | 0.122395 |
| FNIP1    | 0.162028 | 0.042604 | 0.616209 | 0.007577 |
| CKLF     | 0.624826 | 0.303878 | 1.28475  | 0.201008 |
| RPS10P3  | 1.270526 | 0.815453 | 1.979557 | 0.289938 |
| ZNF579   | 2.14851  | 0.957254 | 4.822229 | 0.063731 |
| RNASEK   | 2.076416 | 0.932073 | 4.625714 | 0.073803 |
| NBPF1    | 0.378884 | 0.01244  | 11.54002 | 0.57767  |
| LINGO3   | 11.58718 | 0.970447 | 138.3516 | 0.052836 |
| VAMP2    | 1.408772 | 0.937225 | 2.11757  | 0.099316 |



|           |          |          |          |          |
|-----------|----------|----------|----------|----------|
| MIR1250   | 0.306046 | 0.018951 | 4.942338 | 0.404166 |
| MIR1272   | 0.293578 | 0.014865 | 5.797954 | 0.420675 |
| MIR1286   | 0.668065 | 0.032428 | 13.76316 | 0.793845 |
| MIR1296   | 1.693155 | 0.126008 | 22.75071 | 0.69117  |
| SNORD111  | 4.866019 | 0.298549 | 79.31085 | 0.266523 |
| MIR1302-1 | 0.957622 | 0.038364 | 23.90375 | 0.978955 |
| SNORA111  | 3.017107 | 0.326432 | 27.88613 | 0.33042  |
| MIR548E   | 3.415445 | 0.171211 | 68.13378 | 0.421217 |
| MIR548L   | 5.232799 | 0.60929  | 44.94112 | 0.131457 |
| MIR548P   | 4.445289 | 0.350325 | 56.40651 | 0.249802 |
| MIR1284   | 1.089721 | 0.051059 | 23.25719 | 0.956122 |
| MIR1255A  | 0.034855 | 0.002197 | 0.552966 | 0.01731  |
| MIR1302-2 | 2.851756 | 0.289348 | 28.10635 | 0.369364 |
| MIR548I2  | 1.635566 | 0.146368 | 18.27637 | 0.689513 |
| MIR663B   | 0.972251 | 0.12944  | 7.302808 | 0.978178 |
| SNORA79   | 0.520607 | 0.093303 | 2.904859 | 0.456756 |
| MIR1200   | 0.51789  | 0.031862 | 8.417891 | 0.643715 |
| MIR548Q   | 1.47232  | 0.172934 | 12.53502 | 0.723327 |
| MIR548K   | 0.788456 | 0.038567 | 16.11884 | 0.877317 |
| MIR1288   | 0.887364 | 0.066591 | 11.82458 | 0.927936 |
| MIR320B2  | 1.038696 | 0.049895 | 21.623   | 0.980444 |
| MIR1301   | 1.160159 | 0.088456 | 15.21621 | 0.90993  |
| MIR1202   | 1.813867 | 0.157561 | 20.88145 | 0.632902 |
| MIR1277   | 0.587241 | 0.072313 | 4.768861 | 0.618382 |
| MIR1271   | 0.437289 | 0.047052 | 4.06407  | 0.467097 |
| MIR1827   | 21.16176 | 0.983564 | 455.3032 | 0.05125  |
| MIR320C1  | 3.248461 | 0.181636 | 58.09708 | 0.4233   |
| SNORD101  | 0.476899 | 0.223025 | 1.019762 | 0.056198 |
| MIR548O   | 0.635237 | 0.034115 | 11.82844 | 0.761031 |
| SNORD112  | 1.947527 | 0.278038 | 13.6415  | 0.502124 |
| MIR548H1  | 1.40371  | 0.144001 | 13.68328 | 0.770367 |
| SNORD99   | 0.312102 | 0.161258 | 0.604051 | 0.000548 |
| MIR1180   | 1.432864 | 0.09092  | 22.58137 | 0.798219 |
| MIR1255B  | 0.747698 | 0.036784 | 15.19805 | 0.849932 |
| MIR1249   | 2.182302 | 0.140815 | 33.82057 | 0.576791 |
| MIR1276   | 0.944526 | 0.077217 | 11.5536  | 0.96437  |
| SNORA77   | 0.340686 | 0.066515 | 1.744965 | 0.196366 |
| MIR1290   | 0.919728 | 0.057489 | 14.71402 | 0.952829 |
| MIR548N   | 0.115236 | 0.003962 | 3.35144  | 0.208889 |
| RNU6ATA1  | 0.983445 | 0.457614 | 2.113491 | 0.965886 |
| MIR1278   | 1.093672 | 0.06892  | 17.35515 | 0.94938  |
| SNORA11   | 1.524108 | 0.189848 | 12.23563 | 0.691715 |
| MIR1203   | 1.192312 | 0.043731 | 32.50798 | 0.916938 |
| SNORD93   | 0.530378 | 0.026366 | 10.66921 | 0.678799 |
| MIR548J   | 0.419807 | 0.016785 | 10.49985 | 0.597204 |
| MIR1289-1 | 0.358289 | 0.032367 | 3.96608  | 0.402727 |
| MIR1205   | 0.095901 | 0.003833 | 2.399212 | 0.153519 |
| MIR548F2  | 0.732189 | 0.061056 | 8.78047  | 0.805735 |
| MIR1183   | 10.46676 | 0.453232 | 241.7152 | 0.142665 |
| MIR1256   | 0.877423 | 0.128921 | 5.971657 | 0.893686 |
| PPP3R1    | 0.713173 | 0.425    | 1.196744 | 0.200575 |
| FANCG     | 0.388796 | 0.204152 | 0.740441 | 0.00405  |
| AP4M1     | 1.332775 | 0.451744 | 3.932068 | 0.602783 |
| TAS2R41   | 0.534949 | 0.048818 | 5.861952 | 0.608546 |
| PLXNA4    | 3.350411 | 0.181107 | 61.98137 | 0.416684 |
| CEBPD     | 1.26311  | 0.980076 | 1.627881 | 0.071155 |
| OR3A2     | 0.662933 | 0.067166 | 6.543175 | 0.724904 |
| NPTXR     | 1.11434  | 0.105962 | 11.71887 | 0.928143 |

|          |          |          |          |          |
|----------|----------|----------|----------|----------|
| PPP2R2A  | 0.963781 | 0.52773  | 1.760131 | 0.904442 |
| TRIM16   | 5.680896 | 1.880433 | 17.16231 | 0.002074 |
| TIGD1    | 0.115587 | 0.013251 | 1.008212 | 0.050871 |
| FXYP7    | 0.720656 | 0.131881 | 3.937979 | 0.705375 |
| SLC12A8  | 2.419539 | 0.342746 | 17.08022 | 0.375554 |
| KIR2DS4  | 0.236659 | 0.027786 | 2.015693 | 0.187302 |
| APOL6    | 0.568115 | 0.089798 | 3.594249 | 0.548013 |
| FADS3    | 0.750513 | 0.159339 | 3.535038 | 0.716625 |
| CCNL2    | 1.744173 | 0.230454 | 13.20065 | 0.590104 |
| UBA52    | 1.119859 | 0.336167 | 3.730535 | 0.853715 |
| MYBPHL   | 11.09018 | 0.898863 | 136.8308 | 0.060546 |
| PPT2     | 0.279317 | 0.067473 | 1.156282 | 0.078472 |
| ZNF630   | 0.352694 | 0.075385 | 1.650097 | 0.185574 |
| TIAF1    | 1.2296   | 0.399767 | 3.781993 | 0.718434 |
| MIR1915  | 2.813019 | 0.446775 | 17.71153 | 0.270586 |
| SNORD121 | 0.180671 | 0.046747 | 0.698266 | 0.013114 |
| SNORA361 | 3.349534 | 0.190361 | 58.93735 | 0.408693 |
| MIR1537  | 5.755518 | 0.347915 | 95.21287 | 0.221523 |
| MIR1913  | 0.058675 | 0.002431 | 1.416354 | 0.080866 |
| SNORD71  | 0.642071 | 0.118819 | 3.469604 | 0.606752 |
| EXOSC6   | 0.717869 | 0.340142 | 1.515062 | 0.384417 |
| VPS52    | 1.638899 | 0.61411  | 4.373794 | 0.32393  |
| RPL23AP5 | 0.433665 | 0.165294 | 1.137766 | 0.089564 |
| CDRT15   | 4.266569 | 0.359195 | 50.67888 | 0.250538 |
| ZNF844   | 1.475365 | 0.646463 | 3.367094 | 0.355609 |
| HBD      | 1.02288  | 0.844478 | 1.238971 | 0.817046 |
| RFPL4A   | 1.217175 | 0.314695 | 4.707782 | 0.775824 |
| HLA-DPB1 | 1.086095 | 0.816194 | 1.445249 | 0.570991 |
| OR2L1P   | 4.011328 | 0.057916 | 277.8274 | 0.52058  |
| ATXN1L   | 1.167715 | 0.176492 | 7.725877 | 0.872229 |
| HLA-DPB2 | 1.26809  | 0.108214 | 14.85996 | 0.84998  |
| TMEM1831 | 0.414222 | 0.105972 | 1.619097 | 0.205098 |
| SRP14P1  | 0.571109 | 0.230877 | 1.412723 | 0.225418 |
| INE1     | 7.9701   | 1.007161 | 63.07085 | 0.049215 |
| BRI3P1   | 1.43509  | 0.98272  | 2.095697 | 0.06152  |
| PLEKHM1  | 1.98676  | 1.082907 | 3.645018 | 0.026609 |
| HSPA7    | 1.114791 | 0.826174 | 1.504235 | 0.477175 |
| ZNF469   | 0.593214 | 0.100234 | 3.510806 | 0.564866 |
| SLC26A6  | 2.320828 | 1.0543   | 5.108837 | 0.0365   |
| DHRS4L1  | 0.114207 | 0.006271 | 2.080076 | 0.14283  |
| MIAT     | 1.048774 | 0.558223 | 1.970407 | 0.882335 |
| ERCC6    | 3.65743  | 0.446183 | 29.98052 | 0.227005 |
| NOL7     | 0.644209 | 0.306212 | 1.355289 | 0.246535 |
| GTF2H2B  | 1.101499 | 0.547876 | 2.214552 | 0.786156 |
| TMEM1911 | 0.946655 | 0.577348 | 1.552193 | 0.827985 |
| NPY6R    | 0.032616 | 0.002888 | 0.368334 | 0.005649 |
| TMEM1851 | 2.314886 | 1.062363 | 5.04413  | 0.034669 |
| SMCR5    | 0.863068 | 0.446937 | 1.666646 | 0.660956 |
| TAS2R46  | 2.008219 | 0.205979 | 19.57935 | 0.548435 |
| SRRM5    | 0.437123 | 0.039302 | 4.861776 | 0.500755 |
| FAM30A   | 1.342485 | 1.001008 | 1.800452 | 0.049219 |
| PGAM4    | 1.353423 | 0.711514 | 2.574446 | 0.356273 |
| HNRNPA3  | 0.557485 | 0.202556 | 1.534337 | 0.257972 |
| LTA      | 1.325679 | 0.602156 | 2.918556 | 0.48381  |
| WDR46    | 0.98859  | 0.426679 | 2.290503 | 0.978645 |
| ZNF717   | 0.365552 | 0.073609 | 1.815386 | 0.218428 |
| PARG     | 0.644052 | 0.021469 | 19.32073 | 0.799849 |
| SCAMP4   | 2.305432 | 0.662542 | 8.022156 | 0.18922  |

|          |          |          |          |          |
|----------|----------|----------|----------|----------|
| LTB      | 1.106816 | 0.824444 | 1.485898 | 0.499457 |
| POLR2J2  | 1.112357 | 0.635971 | 1.94559  | 0.708933 |
| PPIAP19  | 11.32393 | 0.194545 | 659.1348 | 0.241825 |
| ORM2     | 0.99334  | 0.596431 | 1.65438  | 0.979516 |
| LYPLA2P1 | 0.971723 | 0.158792 | 5.946418 | 0.975241 |
| CCT6P1   | 0.153123 | 0.025612 | 0.91547  | 0.039709 |
| ARL17B   | 0.171731 | 0.022682 | 1.300203 | 0.088047 |
| DHFR     | 0.521598 | 0.220728 | 1.232578 | 0.137973 |
| RPL41    | 1.833497 | 0.262063 | 12.82788 | 0.541355 |
| CCDC26   | 1.328594 | 0.534251 | 3.303992 | 0.541025 |
| TTY10    | 0.458463 | 0.082351 | 2.552346 | 0.373311 |
| ORM1     | 0.99115  | 0.799795 | 1.228287 | 0.935264 |
| HLA-DRB1 | 1.135084 | 0.929183 | 1.386612 | 0.214704 |
| SPINK8   | 1.965263 | 0.538194 | 7.176335 | 0.306581 |
| PATL2    | 0.578267 | 0.197267 | 1.695127 | 0.318196 |
| ZNF492   | 0.576143 | 0.209748 | 1.582571 | 0.284824 |
| XIST     | 0.933687 | 0.715917 | 1.217698 | 0.612594 |
| ZNF688   | 2.975387 | 1.085702 | 8.154101 | 0.034021 |
| EMX2OS   | 0.86022  | 0.261397 | 2.830855 | 0.804328 |
| HBBP1    | 0.980546 | 0.715138 | 1.344456 | 0.902907 |
| ACBD6    | 0.2754   | 0.113068 | 0.670794 | 0.004525 |
| HERC2P4  | 0.050694 | 0.004417 | 0.581762 | 0.016618 |
| DSCR9    | 12.92561 | 1.127685 | 148.1544 | 0.039732 |
| ANKRD18H | 0.596292 | 0.019398 | 18.32959 | 0.767366 |
| PA2G4P4  | 0.131278 | 0.017744 | 0.97123  | 0.046751 |
| PRB4     | 0.133565 | 0.01019  | 1.75078  | 0.125183 |
| YY2      | 0.036905 | 0.002945 | 0.462439 | 0.010532 |
| HSBP1    | 0.680511 | 0.343329 | 1.348841 | 0.270162 |
| HCG18    | 0.692327 | 0.156034 | 3.071877 | 0.628615 |
| HLA-DPA1 | 1.118449 | 0.925012 | 1.352337 | 0.247919 |
| RPS18    | 0.564398 | 0.153349 | 2.077259 | 0.38959  |
| SNORD62I | 1.748602 | 0.596356 | 5.127155 | 0.308606 |
| DLEU2    | 1.205031 | 0.421459 | 3.445414 | 0.727871 |
| PRH1     | 0.282492 | 0.034554 | 2.309507 | 0.238331 |
| TAPBP    | 1.176904 | 0.366221 | 3.78215  | 0.78449  |
| ANXA2P2  | 0.079999 | 0.008348 | 0.766651 | 0.028495 |
| MCTS1    | 0.739598 | 0.412651 | 1.325588 | 0.310953 |
| DYTN     | 1.301674 | 0.088986 | 19.04061 | 0.847268 |
| HLA-DQB1 | 1.491928 | 0.135723 | 16.39991 | 0.743594 |
| TNF      | 1.0415   | 0.856324 | 1.26672  | 0.683938 |
| SNHG7    | 1.293756 | 0.743598 | 2.250955 | 0.362036 |
| RAB1C    | 0.318754 | 0.0261   | 3.892897 | 0.370537 |
| GPX1     | 2.569652 | 1.53298  | 4.307368 | 0.000342 |
| KRT8P15  | 1.815947 | 0.103715 | 31.79531 | 0.682929 |
| MYCNOS   | 1.112545 | 0.579267 | 2.136762 | 0.748753 |
| RPS28    | 5.430501 | 1.170161 | 25.20195 | 0.030724 |
| UQCRHL   | 0.315607 | 0.094109 | 1.058435 | 0.061765 |
| NUDT9P1  | 0.093115 | 0.009568 | 0.906203 | 0.040874 |
| TRIM26   | 0.978217 | 0.456848 | 2.09459  | 0.95479  |
| FAM133B  | 0.702043 | 0.286774 | 1.718647 | 0.438668 |
| JRK      | 0.144088 | 0.017898 | 1.159987 | 0.068682 |
| GAS5     | 0.118051 | 0.013913 | 1.001641 | 0.050176 |
| HLA-B    | 1.267068 | 0.868592 | 1.848349 | 0.219191 |
| MORF4    | 2.244088 | 0.15347  | 32.81367 | 0.554807 |
| MIR155HC | 1.287217 | 0.882554 | 1.877423 | 0.189803 |
| APOC2    | 0.638285 | 0.450639 | 0.904068 | 0.011479 |
| SUMO1P3  | 0.945548 | 0.281762 | 3.17311  | 0.927777 |
| PPP1R3E  | 0.112394 | 0.030228 | 0.417909 | 0.001106 |

|          |          |          |          |          |
|----------|----------|----------|----------|----------|
| SNORA71I | 0.492787 | 0.036361 | 6.678495 | 0.594639 |
| NFAM1    | 5.830821 | 1.60412  | 21.19447 | 0.007414 |
| CYCSP52  | 2.452232 | 0.391355 | 15.36568 | 0.338056 |
| KIAA0040 | 2.656958 | 0.594935 | 11.86587 | 0.200606 |
| IFITM4P  | 26.05547 | 3.205509 | 211.7877 | 0.002292 |
| B3GALT4  | 1.931787 | 1.16893  | 3.192491 | 0.010201 |
| EGOT     | 0.419061 | 0.109622 | 1.601977 | 0.203656 |
| PNMA6A   | 0.981573 | 0.13734  | 7.015347 | 0.985212 |
| ZBTB22   | 1.027114 | 0.36949  | 2.855183 | 0.959098 |
| CLEC2L   | 1.506374 | 0.522313 | 4.344452 | 0.448373 |
| ZBED5    | 0.742904 | 0.394828 | 1.397839 | 0.356803 |
| SLFN14   | 0.07078  | 0.003934 | 1.273589 | 0.072502 |
| BCYRN1   | 0.991173 | 0.424718 | 2.313122 | 0.983641 |
| B3GNT9   | 1.843465 | 0.125207 | 27.14193 | 0.65578  |
| CDKN2AIP | 0.745353 | 0.271169 | 2.048726 | 0.568885 |
| CECR7    | 1.628247 | 0.661146 | 4.00999  | 0.289079 |
| RGL2     | 1.139987 | 0.518955 | 2.504206 | 0.744193 |
| ID2B     | 3.230023 | 0.505732 | 20.62959 | 0.215218 |
| HLA-DQA  | 0.523785 | 0.07378  | 3.718473 | 0.517848 |
| PYY2     | 4.203271 | 0.138419 | 127.6378 | 0.409664 |
| KIFC1    | 0.841434 | 0.574785 | 1.231784 | 0.374603 |
| IRGM     | 0.829735 | 0.45428  | 1.515498 | 0.543661 |
| PTENP1   | 0.556142 | 0.044715 | 6.917002 | 0.64824  |
| LRRC37A2 | 0.614594 | 0.063661 | 5.933424 | 0.673908 |
| OR2W3    | 1.232436 | 0.503532 | 3.016488 | 0.647224 |
| PAGE2B   | 1.077601 | 0.169108 | 6.866746 | 0.936956 |
| SNORD12I | 0.3566   | 0.027817 | 4.571469 | 0.428218 |
| SNORD11  | 0.181454 | 0.069892 | 0.471087 | 0.000454 |
| SNORD12I | 1.135645 | 0.057908 | 22.27139 | 0.933239 |
| SNORA13  | 0.275989 | 0.078285 | 0.972984 | 0.045224 |
| SNORD42I | 0.268043 | 0.051133 | 1.405107 | 0.119329 |
| MIR1976  | 0.790552 | 0.285428 | 2.189595 | 0.65115  |
| SCARNA7  | 0.704759 | 0.113779 | 4.36537  | 0.70687  |
| SNORD12I | 0.082092 | 0.005665 | 1.189602 | 0.06685  |
| SCARNA18 | 0.319024 | 0.053647 | 1.897139 | 0.209117 |
| SNORD12I | 36.76121 | 1.359544 | 994.0001 | 0.03215  |
| SNORA47  | 0.051509 | 0.006239 | 0.425256 | 0.005889 |
| SNORD13  | 1.09935  | 0.861221 | 1.403323 | 0.446979 |
| SNORD12I | 17.07152 | 0.996041 | 292.595  | 0.050321 |
| SNORA59I | 1.279785 | 0.359062 | 4.561473 | 0.703627 |
| SNORA84  | 0.095455 | 0.011766 | 0.774407 | 0.027855 |
| TXNDC5   | 1.131708 | 0.453245 | 2.825763 | 0.790998 |
| RNF103   | 1.18984  | 0.658644 | 2.149446 | 0.564572 |
| RBM14    | 0.846257 | 0.382592 | 1.871837 | 0.680234 |
| ALKBH6   | 0.81902  | 0.310919 | 2.157459 | 0.686217 |
| ASB14    | 0.196163 | 0.006607 | 5.823698 | 0.346446 |
| NME1     | 0.546536 | 0.239127 | 1.249133 | 0.151997 |
| TNFSF12  | 1.933022 | 1.141887 | 3.272282 | 0.014128 |
| CDRT4    | 0.386138 | 0.198679 | 0.750472 | 0.005006 |
| APOBEC3C | 1.449723 | 0.695656 | 3.021174 | 0.321545 |
| WBP1     | 0.653015 | 0.280405 | 1.520761 | 0.323137 |
| MRPS17   | 0.414731 | 0.190709 | 0.901904 | 0.026389 |
| DEFA3    | 1.137805 | 0.934644 | 1.385128 | 0.198285 |
| ADSL     | 0.506425 | 0.256405 | 1.000236 | 0.05008  |
| LILRA4   | 1.091385 | 0.365337 | 3.260335 | 0.87555  |
| LILRA2   | 1.067805 | 0.825919 | 1.380531 | 0.61666  |
| AMY2B    | 0.452149 | 0.179645 | 1.138017 | 0.091905 |
| LY6G5B   | 0.044777 | 0.005117 | 0.391803 | 0.005006 |

|          |          |          |          |          |
|----------|----------|----------|----------|----------|
| PSMB9    | 1.312754 | 0.737098 | 2.337983 | 0.35543  |
| PCDHGC3  | 0.358881 | 0.002837 | 45.3931  | 0.678165 |
| COX19    | 0.668588 | 0.323913 | 1.380032 | 0.276236 |
| DEFA1B   | 1.128197 | 0.941466 | 1.351963 | 0.19135  |
| GHRLOS   | 0.09071  | 0.008384 | 0.981409 | 0.048222 |
| ACAD11   | 0.546542 | 0.347049 | 0.860709 | 0.009125 |
| PPIL3    | 0.267842 | 0.046196 | 1.552929 | 0.141801 |
| RPL23AP7 | 0.605431 | 0.278657 | 1.315407 | 0.204973 |
| KIR3DL2  | 1.216377 | 0.584035 | 2.533366 | 0.600783 |
| RPL29P2  | 1.578474 | 0.87343  | 2.852638 | 0.130593 |
| TNFRSF13 | 1.557099 | 0.539569 | 4.493509 | 0.412821 |
| AQP1     | 1.095867 | 0.38271  | 3.13795  | 0.864575 |
| ISY1     | 0.617666 | 0.262106 | 1.455561 | 0.270618 |
| PCDHGC5  | 31.52385 | 0.438823 | 2264.587 | 0.113584 |
| RDH14    | 0.667198 | 0.252583 | 1.762408 | 0.414198 |
| PLCXD2   | 0.300378 | 0.032623 | 2.765727 | 0.288314 |
| NSUN6    | 0.268583 | 0.101914 | 0.707817 | 0.007839 |
| HLA-DOB  | 1.014317 | 0.42949  | 2.395494 | 0.974136 |
| KRTAP5-8 | 0.536667 | 0.028899 | 9.96614  | 0.676293 |
| CRCP     | 0.184444 | 0.024279 | 1.401165 | 0.102274 |
| RPL36A   | 0.434885 | 0.126459 | 1.49554  | 0.186403 |
| PDXP     | 0.569834 | 0.319859 | 1.015168 | 0.056279 |
| RPP21    | 1.053882 | 0.445643 | 2.492279 | 0.904876 |
| CD302    | 1.134224 | 0.704661 | 1.825649 | 0.604027 |
| EGFL8    | 0.232568 | 0.012464 | 4.339421 | 0.328613 |
| ARHGAP8  | 0.983088 | 0.028681 | 33.6966  | 0.992453 |
| ARPC4    | 2.114105 | 0.887205 | 5.037662 | 0.091062 |
| CORT     | 2.61867  | 0.154387 | 44.41729 | 0.505102 |
| ARPC1A   | 1.249727 | 0.55038  | 2.837708 | 0.594179 |
| SUMO1P1  | 0.380459 | 0.017378 | 8.329397 | 0.539396 |
| PLEKHO2  | 2.153719 | 1.283756 | 3.613229 | 0.003659 |
| PISD     | 1.025585 | 0.541855 | 1.941156 | 0.93814  |
| PWP2     | 0.448549 | 0.132538 | 1.518028 | 0.197429 |
| PI4KA    | 0.750148 | 0.092297 | 6.096834 | 0.78799  |
| AMACR    | 0.371205 | 0.073989 | 1.862346 | 0.228477 |
| SNHG3    | 0.986541 | 0.214685 | 4.533446 | 0.986105 |
| ARFGAP3  | 0.219117 | 0.062348 | 0.770066 | 0.017913 |
| BGLAP    | 1.088258 | 0.357805 | 3.309919 | 0.881532 |
| PEG10    | 7.410382 | 0.20172  | 272.2281 | 0.276021 |
| AK2P2    | 0.704582 | 0.238986 | 2.077254 | 0.525596 |
| EIF6     | 1.330185 | 0.38932  | 4.544833 | 0.649011 |
| PCDHGC4  | 45.72925 | 1.932249 | 1082.244 | 0.017885 |
| MRPL20   | 0.756161 | 0.284353 | 2.010811 | 0.575403 |
| SERPIN1C | 0.87498  | 0.615541 | 1.243768 | 0.45671  |
| HLA-DMB  | 1.127443 | 0.912868 | 1.392457 | 0.265445 |
| DECR2    | 0.484059 | 0.217535 | 1.077131 | 0.075421 |
| CNTF     | 0.035961 | 0.00169  | 0.765057 | 0.033037 |
| ZNF702P  | 1.241021 | 0.468791 | 3.285333 | 0.663759 |
| ZNF709   | 0.266648 | 0.027911 | 2.547421 | 0.251005 |
| EIF4EBP3 | 0.610965 | 0.083339 | 4.479035 | 0.627845 |
| ABCC13   | 1.383306 | 0.193746 | 9.87653  | 0.746292 |
| MRPL33   | 1.01489  | 0.643771 | 1.599952 | 0.949255 |
| MICAL3   | 1.280291 | 0.076679 | 21.37679 | 0.86342  |
| STON1    | 1.54224  | 0.279347 | 8.514506 | 0.619195 |
| PRAF2    | 1.711963 | 0.593904 | 4.934839 | 0.319566 |
| KCTD7    | 0.630748 | 0.252436 | 1.576016 | 0.323962 |
| EFNA4    | 2.550338 | 0.865283 | 7.516876 | 0.089585 |
| INGX     | 0.226512 | 0.017602 | 2.914847 | 0.254609 |

|          |          |          |          |          |
|----------|----------|----------|----------|----------|
| AOX2P    | 0.390829 | 0.111197 | 1.364183 | 0.140741 |
| UPK3B    | 1.521211 | 0.017245 | 134.1882 | 0.854373 |
| IL10RB   | 1.18893  | 0.66715  | 2.118795 | 0.557188 |
| CFB      | 1.048443 | 0.434778 | 2.528264 | 0.916109 |
| ZNF487   | 0.855914 | 0.058634 | 12.49418 | 0.909438 |
| WDR92    | 0.449872 | 0.226273 | 0.894427 | 0.022716 |
| NME2     | 2.271011 | 0.925417 | 5.573153 | 0.073335 |
| PLA2G4B  | 1.006695 | 0.545401 | 1.858145 | 0.982976 |
| TTC4     | 0.877575 | 0.405807 | 1.897795 | 0.739996 |
| RPLP0P2  | 1.331532 | 0.146527 | 12.09997 | 0.799268 |
| JMJD7    | 3.71461  | 0.607183 | 22.72516 | 0.155591 |
| APOBEC3I | 0.917498 | 0.143936 | 5.848464 | 0.927405 |
| RPL12P6  | 1.180896 | 0.759227 | 1.836758 | 0.460658 |
| MRPS6    | 0.772572 | 0.309214 | 1.930272 | 0.580747 |
| ZNF512   | 0.655651 | 0.379987 | 1.131298 | 0.12934  |
| NFS1     | 0.157704 | 0.009483 | 2.622696 | 0.197839 |
| DDOST    | 0.625228 | 0.210811 | 1.854316 | 0.397171 |
| TMEM199  | 1.441891 | 0.489884 | 4.24396  | 0.506427 |
| P2RY11   | 0.851632 | 0.535063 | 1.355501 | 0.498242 |
| TMEM141  | 0.717137 | 0.375858 | 1.368297 | 0.313126 |
| DBNDD2   | 2.061979 | 1.187953 | 3.579062 | 0.010108 |
| ETV5     | 1.088427 | 0.596461 | 1.986171 | 0.782461 |
| KRTAP5-7 | 0.297352 | 0.013506 | 6.546411 | 0.441978 |
| RBM12    | 0.7623   | 0.233612 | 2.48746  | 0.652858 |
| LILRA6   | 1.334722 | 0.629702 | 2.829087 | 0.451283 |
| SCARF2   | 1.252861 | 0.199023 | 7.886821 | 0.810208 |
| APOBEC3C | 1.475806 | 0.537322 | 4.05344  | 0.450247 |
| KRT18P34 | 3.656127 | 0.316651 | 42.21456 | 0.298969 |
| ASPRV1   | 0.802876 | 0.102298 | 6.301303 | 0.834556 |
| FCGR2C   | 0.899646 | 0.349052 | 2.318745 | 0.826708 |
| UBE2V1   | 2.720022 | 0.09431  | 78.44901 | 0.559636 |
| HBB      | 1.369772 | 0.657658 | 2.852964 | 0.400625 |
| N4BP2L2  | 0.590688 | 0.132542 | 2.632463 | 0.489887 |
| ZNF585B  | 0.14772  | 0.005159 | 4.229864 | 0.26384  |
| CEBPA    | 0.895069 | 0.653335 | 1.226244 | 0.490091 |
| SNHG6    | 0.795242 | 0.424572 | 1.489524 | 0.474278 |
| DNM1P35  | 1.514457 | 0.125813 | 18.23003 | 0.743694 |
| PGAM5    | 0.433046 | 0.112885 | 1.661247 | 0.222451 |
| SNHG10   | 0.955786 | 0.563993 | 1.619748 | 0.866562 |
| ZCCHC3   | 1.512558 | 0.750309 | 3.049189 | 0.247333 |
| TWF2     | 2.576477 | 1.31685  | 5.040994 | 0.005715 |
| MARS2    | 0.917898 | 0.294189 | 2.863933 | 0.882687 |
| USP51    | 0.713339 | 0.068034 | 7.479338 | 0.778143 |
| BCKDHA   | 0.715921 | 0.38485  | 1.331798 | 0.291325 |
| INSL3    | 0.589293 | 0.240763 | 1.442358 | 0.246886 |
| PCDHGB8I | 4.711595 | 0.355319 | 62.47666 | 0.239856 |
| POU5F2   | 0.278121 | 0.019548 | 3.956944 | 0.344846 |
| PCP4L1   | 2.303343 | 0.16507  | 32.14033 | 0.53497  |
| ABHD14A  | 0.865299 | 0.465753 | 1.607594 | 0.647098 |
| ANP32C   | 1.216006 | 0.270926 | 5.457847 | 0.798499 |
| CCDC153  | 0.311257 | 0.014073 | 6.883924 | 0.460032 |
| ACTN3    | 0.078964 | 0.006493 | 0.960275 | 0.046397 |
| FMN1     | 2.266174 | 0.202404 | 25.37277 | 0.506827 |
| SNORA58  | 0.058258 | 0.005112 | 0.663969 | 0.022032 |
| HAUS5    | 0.205667 | 0.067956 | 0.622443 | 0.005125 |
| SLED1    | 0.779354 | 0.38762  | 1.56698  | 0.484203 |
| TMEM150I | 0.616414 | 0.040469 | 9.389149 | 0.727685 |
| NAIP     | 2.36479  | 0.732763 | 7.631706 | 0.14992  |

|          |          |          |          |          |
|----------|----------|----------|----------|----------|
| ZNF324B  | 1.228204 | 0.238519 | 6.324382 | 0.805816 |
| ZNF564   | 1.519732 | 0.754783 | 3.059934 | 0.241153 |
| PVT1     | 1.010601 | 0.466756 | 2.188114 | 0.978655 |
| PDCD6    | 0.31757  | 0.118053 | 0.854286 | 0.023093 |
| TMEM158  | 1.178426 | 0.941161 | 1.475505 | 0.152345 |
| YJFN3    | 0.309379 | 0.063279 | 1.512597 | 0.147369 |
| PTTG2    | 0.632643 | 0.068836 | 5.814349 | 0.685807 |
| ZNF718   | 0.199509 | 0.017753 | 2.242066 | 0.1916   |
| GYPB     | 1.041921 | 0.868831 | 1.249493 | 0.657741 |
| CHCHD10  | 2.095936 | 1.434168 | 3.063065 | 0.000132 |
| GPR162   | 1.761468 | 1.102935 | 2.813193 | 0.017782 |
| ATP6V1E2 | 0.330428 | 0.10237  | 1.066552 | 0.063998 |
| GLI4     | 1.451322 | 0.618243 | 3.406967 | 0.392276 |
| RNF138P1 | 2.484987 | 0.177885 | 34.71441 | 0.498666 |
| ZNF674   | 0.17295  | 0.037167 | 0.804786 | 0.025299 |
| ZNF345   | 0.288258 | 0.023533 | 3.53097  | 0.330519 |
| SHANK3   | 1.14239  | 0.90124  | 1.448066 | 0.271152 |
| ZNF550   | 0.287626 | 0.081659 | 1.013107 | 0.052417 |
| RPL32P3  | 0.602376 | 0.082515 | 4.397486 | 0.617252 |
| FOXD1    | 4.229431 | 0.87295  | 20.49153 | 0.073263 |
| MALAT1   | 0.47845  | 0.03647  | 6.276859 | 0.574576 |
| PRB1     | 1.086675 | 0.067816 | 17.41266 | 0.953168 |
| SCARNA8  | 0.174085 | 0.023091 | 1.312433 | 0.089853 |
| SCARNA6  | 6.71278  | 0.475545 | 94.75735 | 0.158641 |
| SCARNA27 | 1.708182 | 0.106664 | 27.35584 | 0.705152 |
| SNORD79  | 0.489527 | 0.036503 | 6.56482  | 0.589683 |
| SCARNA11 | 0.627494 | 0.049849 | 7.898792 | 0.718374 |
| SCARNA5  | 2.385918 | 0.405368 | 14.04305 | 0.336286 |
| SNORD27  | 2.051951 | 0.361241 | 11.65565 | 0.417334 |
| MIR2278  | 0.267067 | 0.024791 | 2.877084 | 0.276328 |
| RNY4     | 0.908837 | 0.601842 | 1.372427 | 0.649432 |
| SCARNA20 | 1.020308 | 0.428122 | 2.431618 | 0.96381  |
| MIR2276  | 7.124025 | 0.612555 | 82.85254 | 0.116776 |
| SCARNA14 | 0.3716   | 0.088828 | 1.554532 | 0.175176 |
| SCARNA21 | 0.578401 | 0.095184 | 3.514747 | 0.552064 |
| SCARNA3  | 0.271566 | 0.054227 | 1.359992 | 0.112765 |
| SCARNA1  | 1.759144 | 0.132488 | 23.35754 | 0.668597 |
| MIR2116  | 0.532873 | 0.155385 | 1.827428 | 0.316777 |
| PCDHGA1  | 3.614487 | 0.56726  | 23.0309  | 0.173849 |
| HOXA10   | 1.21926  | 0.888858 | 1.672477 | 0.218941 |
| TMEM200  | 12.39528 | 0.813291 | 188.9151 | 0.0701   |
| PCDHGB6  | 1.570263 | 0.481953 | 5.116115 | 0.453991 |
| SERPINE3 | 1.56866  | 0.165679 | 14.85221 | 0.694654 |
| TUG1     | 0.565943 | 0.300559 | 1.065651 | 0.077895 |
| TRNP1    | 1.438724 | 0.982841 | 2.106063 | 0.061353 |
| PCDHGA5  | 10.85188 | 0.530679 | 221.9108 | 0.121506 |
| NACA2    | 2.110995 | 0.900369 | 4.949412 | 0.085694 |
| PCDHGA7  | 0.476634 | 0.018991 | 11.96243 | 0.652241 |
| RNF5P1   | 1.341906 | 0.687551 | 2.619022 | 0.388704 |
| SLC10A5  | 0.02365  | 0.00114  | 0.490764 | 0.015521 |
| EIF5AL1  | 3.104451 | 0.343537 | 28.05408 | 0.313147 |
| ALG11    | 0.311277 | 0.075815 | 1.278019 | 0.10533  |
| PRKDC    | 0.424705 | 0.126047 | 1.431007 | 0.167056 |
| PCDHGA6  | 0.646978 | 0.045193 | 9.261978 | 0.748451 |
| PCDHGA8  | 0.620573 | 0.047216 | 8.156339 | 0.716585 |
| PCDHGA1  | 0.018499 | 0.00055  | 0.622698 | 0.026149 |
| PCDHGA1  | 1.138449 | 0.010279 | 126.0897 | 0.956944 |
| PCDHGB2  | 0.356489 | 0.034864 | 3.645116 | 0.384536 |

|           |          |          |          |          |
|-----------|----------|----------|----------|----------|
| PCDHGB4   | 2.810832 | 0.286965 | 27.53222 | 0.374711 |
| CLDN23    | 1.454273 | 1.024797 | 2.063738 | 0.035983 |
| ZNF260    | 0.955596 | 0.436532 | 2.091859 | 0.909536 |
| LYN       | 1.514368 | 0.937669 | 2.445755 | 0.089731 |
| PINX1     | 1.18928  | 0.239599 | 5.903159 | 0.832057 |
| PCDHGB7   | 6.389236 | 0.169461 | 240.8951 | 0.316614 |
| SIGLEC14  | 1.130584 | 0.924905 | 1.382001 | 0.230921 |
| CHMP4A    | 0.524864 | 0.247869 | 1.111404 | 0.092177 |
| SIGLEC12  | 1.247012 | 0.436767 | 3.560341 | 0.680038 |
| FLJ20021  | 1.215751 | 0.613015 | 2.411118 | 0.576022 |
| PABPC4L   | 0.760166 | 0.31623  | 1.82732  | 0.540016 |
| OMP       | 0.633633 | 0.030838 | 13.01949 | 0.767338 |
| FPGT      | 0.895437 | 0.121167 | 6.617367 | 0.913817 |
| MEX3A     | 1.799311 | 0.673026 | 4.810394 | 0.241698 |
| SLC22A18, | 1.946577 | 0.949375 | 3.991216 | 0.069041 |
| MPV17L2   | 1.91882  | 0.613832 | 5.998169 | 0.262409 |
| SCARNA9   | 1.172702 | 0.847054 | 1.623544 | 0.337126 |
| DPP3      | 1.276245 | 0.567107 | 2.872124 | 0.555594 |
| ANKHD1-I  | 1.377238 | 0.28846  | 6.575558 | 0.688198 |
| KRTAP5-9  | 0.036852 | 0.001944 | 0.698553 | 0.027881 |
| CHMP1B    | 1.090002 | 0.585657 | 2.028669 | 0.785694 |
| EID3      | 0.488569 | 0.189354 | 1.260599 | 0.138581 |
| SNHG9     | 1.015428 | 0.54543  | 1.890426 | 0.961491 |
| CARD17    | 17.38814 | 1.874473 | 161.2973 | 0.011977 |
| EID1      | 0.337995 | 0.102448 | 1.11511  | 0.074901 |
| TAS2R43   | 3.872553 | 0.306807 | 48.87981 | 0.295281 |
| LY6G6E    | 3.569488 | 0.303935 | 41.9209  | 0.311348 |
| FDXACB1   | 0.521207 | 0.169258 | 1.604989 | 0.256165 |
| SNHG1     | 0.426862 | 0.260216 | 0.700231 | 0.000749 |
| TIFAB     | 0.890162 | 0.226315 | 3.501268 | 0.867748 |
| CYP2A6    | 0.469623 | 0.043541 | 5.065247 | 0.533353 |
| CTSO      | 0.856337 | 0.442202 | 1.65832  | 0.645558 |
| ZNF432    | 0.094762 | 0.012827 | 0.700088 | 0.020921 |
| TAS2R30   | 8.289467 | 0.478174 | 143.7034 | 0.146202 |
| ZNF10     | 0.716879 | 0.339525 | 1.51363  | 0.382717 |
| ZNF486    | 0.782114 | 0.349876 | 1.748338 | 0.54932  |
| HMBS      | 0.973702 | 0.715588 | 1.324918 | 0.865334 |
| ZNF225    | 0.429574 | 0.084763 | 2.177045 | 0.307522 |
| TAS2R31   | 0.045822 | 0.002325 | 0.903089 | 0.042664 |
| POLG2     | 0.238634 | 0.106878 | 0.532815 | 0.000472 |
| CLEC12B   | 0.673317 | 0.22848  | 1.984229 | 0.473185 |
| ZNF350    | 0.463426 | 0.177627 | 1.209071 | 0.115965 |
| ZNF253    | 4.190141 | 0.652005 | 26.92816 | 0.131202 |
| CAPNS2    | 1.306989 | 0.128011 | 13.34429 | 0.821317 |
| HP        | 0.967127 | 0.782765 | 1.194912 | 0.756748 |
| LSM14A    | 0.54267  | 0.27597  | 1.067111 | 0.076445 |
| NHLRC4    | 1.960586 | 0.769218 | 4.99715  | 0.158444 |
| GATC      | 0.810416 | 0.214676 | 3.059374 | 0.756452 |
| MGAM      | 0.609439 | 0.156122 | 2.379009 | 0.47604  |
| FNTB      | 0.676114 | 0.282476 | 1.618299 | 0.37943  |
| ZNF878    | 3.000632 | 0.124831 | 72.12778 | 0.498196 |
| CNPY2     | 0.438026 | 0.212309 | 0.903717 | 0.025487 |
| MRS2P2    | 0.350286 | 0.026072 | 4.70613  | 0.428698 |
| CUX1      | 0.620128 | 0.089856 | 4.279712 | 0.627806 |
| MAP1LC3F  | 6.723426 | 0.976176 | 46.30769 | 0.052932 |
| CLEC5A    | 0.732362 | 0.533388 | 1.005561 | 0.054144 |
| CHURC1    | 0.825461 | 0.55131  | 1.235941 | 0.351658 |
| RTEL1     | 2.558978 | 0.393337 | 16.64824 | 0.325414 |



|          |          |          |          |          |
|----------|----------|----------|----------|----------|
| PDF      | 1.773981 | 0.51106  | 6.1578   | 0.366643 |
| SPESP1   | 0.98993  | 0.185536 | 5.281781 | 0.990547 |
| MC1R     | 0.26205  | 0.076054 | 0.902921 | 0.033858 |
| TUBB3    | 1.057626 | 0.613094 | 1.824473 | 0.840393 |
| ITGB3    | 1.123283 | 0.739707 | 1.705762 | 0.585459 |
| THTPA    | 1.170556 | 0.243423 | 5.628893 | 0.844188 |
| MRPL46   | 1.141174 | 0.44783  | 2.907973 | 0.782008 |
| TYRO3P   | 0.551818 | 0.052441 | 5.80653  | 0.620516 |
| RBM15B   | 0.806582 | 0.325224 | 2.000392 | 0.64277  |
| HOXB7    | 1.194968 | 0.953561 | 1.497491 | 0.12187  |
| MRC1     | 2.56464  | 0.090172 | 72.9429  | 0.581376 |
| HSPB9    | 0.300105 | 0.021534 | 4.182379 | 0.370548 |
| MT1L     | 1.19161  | 0.288767 | 4.917235 | 0.808468 |
| CCPG1    | 0.587388 | 0.284035 | 1.214727 | 0.151216 |
| EPPK1    | 0.235038 | 0.011006 | 5.019544 | 0.353897 |
| BOP1     | 1.094285 | 0.602576 | 1.987235 | 0.767245 |
| FIGNL2   | 1.983631 | 0.315111 | 12.48702 | 0.465586 |
| PECAM1   | 1.226637 | 0.916949 | 1.640919 | 0.168837 |
| UBE2MP1  | 1.412757 | 0.068303 | 29.22097 | 0.823096 |
| GAN      | 0.080292 | 0.005068 | 1.272159 | 0.073583 |
| HPR      | 0.07811  | 0.002239 | 2.724982 | 0.159478 |
| PCDHGA9  | 6.750591 | 0.213737 | 213.2078 | 0.278346 |
| PCDHGB3  | 0.055987 | 0.003168 | 0.989486 | 0.049163 |
| CORO7    | 2.255338 | 1.234192 | 4.121362 | 0.008193 |
| SPON1    | 1.412802 | 1.025458 | 1.946457 | 0.034538 |
| MRPL12   | 1.28603  | 0.812025 | 2.036728 | 0.283564 |
| ALOX12P2 | 1.729785 | 0.153352 | 19.5117  | 0.657569 |
| GTF2I    | 0.176607 | 0.033518 | 0.93055  | 0.040869 |
| ZNF234   | 0.751999 | 0.306111 | 1.847374 | 0.534245 |
| IKBKE    | 0.967615 | 0.382791 | 2.445928 | 0.944529 |
| SNORD43  | 0.999451 | 0.491648 | 2.031744 | 0.99879  |
| SNORD3A  | 1.009519 | 0.77243  | 1.319379 | 0.9447   |
| NBPF11   | 0.458108 | 0.074073 | 2.833179 | 0.401055 |
| RNU4ATA1 | 1.15948  | 0.869401 | 1.546346 | 0.313798 |
| DYNLL2   | 0.64947  | 0.378406 | 1.114705 | 0.117356 |
| OTUD7B   | 0.820741 | 0.150205 | 4.484643 | 0.819648 |
| DPRXP4   | 1.283296 | 0.26161  | 6.295054 | 0.758535 |
| SNORD3C  | 1.008073 | 0.776819 | 1.308169 | 0.951778 |
| SNORD92  | 0.373485 | 0.030453 | 4.580593 | 0.441262 |
| SNORD53  | 0.964395 | 0.081    | 11.48219 | 0.977115 |
| ANXA8    | 0.658466 | 0.164903 | 2.62929  | 0.554189 |
| RBM8A    | 0.270297 | 0.052927 | 1.380383 | 0.115837 |
| ARGFXP2  | 3.666233 | 0.212361 | 63.29428 | 0.371389 |
| TIMM23   | 1.119339 | 0.449438 | 2.787749 | 0.808661 |
| RNF115   | 0.098138 | 0.033312 | 0.289115 | 2.54E-05 |
| RPL17    | 0.939361 | 0.306162 | 2.882132 | 0.912914 |
| SEC22B   | 0.264446 | 0.100871 | 0.693282 | 0.006832 |
| FSBP     | 2.996581 | 0.500227 | 17.95083 | 0.229531 |
| TXNIP    | 0.769337 | 0.442319 | 1.33813  | 0.353121 |
| SRGAP2   | 8.848965 | 1.131927 | 69.17779 | 0.037702 |
| BAHCC1   | 0.91358  | 0.442251 | 1.887225 | 0.807091 |
| RASSF5   | 0.703474 | 0.322338 | 1.535269 | 0.377065 |
| STRADA   | 0.208725 | 0.031213 | 1.395775 | 0.106089 |
| MIR744   | 0.827177 | 0.06985  | 9.795546 | 0.880405 |
| NBPF15   | 16.3603  | 0.237297 | 1127.951 | 0.195671 |
| NCOA4    | 0.835073 | 0.447708 | 1.557593 | 0.570932 |
| MRPS21   | 1.115086 | 0.39296  | 3.164232 | 0.837803 |
| GDF10    | 0.654959 | 0.078647 | 5.454366 | 0.695567 |

|          |          |          |          |          |
|----------|----------|----------|----------|----------|
| MYO15B   | 2.124268 | 0.168596 | 26.76521 | 0.560011 |
| AARSD1   | 0.60639  | 0.274716 | 1.338506 | 0.21562  |
| MIR212   | 0.445625 | 0.077272 | 2.569903 | 0.365918 |
| MIR132   | 0.385383 | 0.024258 | 6.122575 | 0.499183 |
| LCN6     | 1.045696 | 0.343149 | 3.18661  | 0.937355 |
| S1PR2    | 0.783842 | 0.055638 | 11.04294 | 0.856801 |
| ZNF224   | 0.358754 | 0.141708 | 0.90824  | 0.030537 |
| LIN37    | 2.677318 | 0.733993 | 9.76581  | 0.135811 |
| NDUFA7   | 0.780228 | 0.359757 | 1.692131 | 0.529808 |
| NBPF12   | 6.571957 | 0.438906 | 98.40521 | 0.172699 |
| CLEC4GP1 | 299.1861 | 2.789533 | 32088.65 | 0.016847 |
| CT45A1   | 0.815985 | 0.512422 | 1.299381 | 0.391611 |
| MAGIX    | 0.180698 | 0.014068 | 2.321061 | 0.189007 |
| IKBKG    | 1.112197 | 0.515975 | 2.397365 | 0.786111 |
| SPIB     | 1.522935 | 1.107328 | 2.094528 | 0.009683 |
| TMEM185  | 0.841449 | 0.234466 | 3.019782 | 0.791174 |
| NBPF9    | 10.12786 | 0.353818 | 289.905  | 0.176097 |
| KCNQ1OT  | 1.067135 | 0.338199 | 3.367179 | 0.911751 |
| EGLN2    | 1.288648 | 0.313768 | 5.292485 | 0.724963 |
| SNHG8    | 1.18514  | 0.408702 | 3.436626 | 0.7545   |
| TERC     | 1.527368 | 0.676235 | 3.449769 | 0.308265 |
| NBPF8    | 1.609665 | 0.802432 | 3.22896  | 0.180164 |
| NBPF14   | 0.821679 | 0.327637 | 2.060685 | 0.675454 |
| TAF15    | 0.412815 | 0.203581 | 0.83709  | 0.014168 |
| RASL10B  | 7.900742 | 1.71815  | 36.33077 | 0.007925 |
| SRXN1    | 1.715165 | 0.981902 | 2.996011 | 0.057988 |
| NBPF10   | 2.117095 | 0.387202 | 11.57559 | 0.38686  |
| MMP28    | 1.906035 | 1.005587 | 3.612785 | 0.048037 |
| CCL5     | 0.941728 | 0.711738 | 1.246038 | 0.674303 |
| LIX1L    | 0.924898 | 0.349816 | 2.445384 | 0.874944 |
| SNORD111 | 0.428448 | 0.121185 | 1.51477  | 0.188353 |
| MIR98    | 1.120077 | 0.570106 | 2.200595 | 0.742076 |
| ANKRD34  | 0.601435 | 0.062461 | 5.791235 | 0.659932 |
| SNORD14  | 0.534164 | 0.304151 | 0.938122 | 0.02909  |
| MIR139   | 2.264253 | 0.202861 | 25.27267 | 0.506721 |
| GTF2H5   | 1.076488 | 0.585771 | 1.978292 | 0.812357 |
| NUDT3    | 0.690661 | 0.243733 | 1.957113 | 0.486154 |
| POM121C  | 0.763802 | 0.393321 | 1.48325  | 0.426194 |
| CD24     | 1.082881 | 0.86953  | 1.348579 | 0.476946 |
| SNORA28  | 0.364235 | 0.200189 | 0.66271  | 0.000942 |
| ZNF595   | 25.29109 | 1.098176 | 582.4558 | 0.043541 |
| DOC2B    | 1.984677 | 0.336392 | 11.70937 | 0.449102 |
| MESTIT1  | 2.515586 | 0.157436 | 40.19522 | 0.514115 |
| DCP1A    | 0.78586  | 0.349202 | 1.768533 | 0.560376 |
| FAM106A  | 83.28828 | 1.003168 | 6915.033 | 0.049836 |
| SNURF    | 0.632221 | 0.399883 | 0.999551 | 0.049776 |
| DGCR11   | 1.094703 | 0.285055 | 4.204008 | 0.895143 |
| ZNHIT3   | 1.041826 | 0.28165  | 3.853721 | 0.951044 |
| CYFIP1   | 3.082744 | 1.216695 | 7.810757 | 0.017622 |
| USP27X   | 1.712501 | 0.257987 | 11.36748 | 0.577498 |
| TAF9     | 0.973441 | 0.594119 | 1.594944 | 0.914906 |
| NOL12    | 0.530045 | 0.22866  | 1.228669 | 0.138905 |
| ANTXRL   | 9.185588 | 1.025112 | 82.3081  | 0.047464 |
| SOCS7    | 1.524494 | 0.105178 | 22.09667 | 0.75725  |
| ADRA2B   | 3.491878 | 0.63441  | 19.21976 | 0.150716 |
| ZNF658   | 4.394585 | 0.826229 | 23.37411 | 0.082545 |
| SEBOX    | 0.033986 | 0.000859 | 1.344487 | 0.071512 |
| PI4KAP1  | 0.675585 | 0.318653 | 1.432324 | 0.306375 |

|         |          |          |          |          |
|---------|----------|----------|----------|----------|
| CCL23   | 0.844518 | 0.656923 | 1.085685 | 0.187329 |
| RNU11   | 1.004807 | 0.796538 | 1.267532 | 0.96772  |
| ZNF280B | 0.337054 | 0.049436 | 2.298038 | 0.266828 |
| MLLT6   | 0.752067 | 0.419398 | 1.34861  | 0.338948 |
| NUDT18  | 1.37882  | 0.716938 | 2.651757 | 0.335701 |
| SNORD91 | 0.436588 | 0.063526 | 3.000469 | 0.399391 |
| ZNF2    | 3.384711 | 0.536209 | 21.36529 | 0.194631 |
| LENG9   | 5.517055 | 0.671309 | 45.34113 | 0.112029 |
| CCL4    | 2.69924  | 0.849126 | 8.580465 | 0.092414 |
| MIR1299 | 2.488583 | 0.177047 | 34.97977 | 0.498988 |
| CCL18   | 0.403811 | 0.035274 | 4.62272  | 0.465961 |
| FCGBP   | 2.096605 | 0.914943 | 4.804401 | 0.080144 |
| XKR5    | 0.228641 | 0.017666 | 2.959125 | 0.258679 |
| MT1IP   | 0.73774  | 0.063576 | 8.560812 | 0.807857 |
| AATF    | 0.663251 | 0.237636 | 1.85116  | 0.433009 |
| ARHGAP2 | 1.253825 | 0.379299 | 4.144698 | 0.710785 |
| TUBGCP5 | 0.16438  | 0.050851 | 0.531376 | 0.00256  |
| PRSS2   | 1.179898 | 0.78348  | 1.776891 | 0.428421 |
| DUSP14  | 0.993555 | 0.647695 | 1.5241   | 0.976372 |
| UHRF1   | 0.620621 | 0.359054 | 1.072738 | 0.087545 |
| ORAI1   | 1.732834 | 1.041117 | 2.884125 | 0.034432 |
| CCL4L2  | 1.457793 | 0.972058 | 2.186246 | 0.068317 |
| CCL3L3  | 1.212741 | 1.021041 | 1.440433 | 0.028009 |
| RN7SL1  | 0.355589 | 0.063623 | 1.987398 | 0.238923 |
| PIK3R6  | 0.908334 | 0.539454 | 1.529456 | 0.717618 |
| TADA2A  | 0.19405  | 0.036888 | 1.02079  | 0.052908 |
| PIP4K2B | 0.757979 | 0.197049 | 2.915687 | 0.686849 |
| PCDHGB5 | 0.162053 | 0.009916 | 2.648348 | 0.201708 |
| HERC2P2 | 0.199316 | 0.025896 | 1.5341   | 0.121388 |
| RAB7B   | 0.775501 | 0.605164 | 0.993783 | 0.044511 |
| DACH1   | 1.048736 | 0.603644 | 1.822014 | 0.865913 |
| PADI6   | 0.204895 | 0.02341  | 1.793365 | 0.152073 |
| GTF2IP1 | 0.657241 | 0.314754 | 1.372392 | 0.263876 |
| STAG3L2 | 0.707974 | 0.49813  | 1.006216 | 0.054177 |
| TYW1B   | 0.354661 | 0.168288 | 0.747436 | 0.006424 |
| F8A3    | 3.639235 | 0.647518 | 20.45355 | 0.142498 |
| PIGW    | 0.047895 | 0.005564 | 0.412314 | 0.005665 |
| F8A1    | 1.109138 | 0.604056 | 2.036545 | 0.738309 |
| PCGF2   | 1.009217 | 0.118765 | 8.57593  | 0.993295 |
| MARCKS  | 0.970926 | 0.777721 | 1.212128 | 0.79438  |
| ZNF670  | 5.89326  | 0.366975 | 94.64009 | 0.210477 |
| PKD1L3  | 0.07987  | 0.007493 | 0.851405 | 0.036332 |
| CCL3    | 1.235148 | 1.042219 | 1.463789 | 0.014802 |
| PGM5P2  | 8.347964 | 0.312533 | 222.9799 | 0.205493 |
| PSMB3   | 1.734664 | 0.566605 | 5.310683 | 0.334621 |
| CISD3   | 1.102581 | 0.21114  | 5.757708 | 0.907814 |
| RDM1    | 0.371061 | 0.031049 | 4.43443  | 0.433478 |
| DDX52   | 0.63373  | 0.174766 | 2.298015 | 0.487679 |
| ZNF8    | 0.293233 | 0.033303 | 2.581889 | 0.269011 |
| SSTR3   | 2.340189 | 0.158152 | 34.62797 | 0.536266 |
| MYO19   | 0.097768 | 0.017182 | 0.556307 | 0.008767 |
| GGNBP2  | 0.73154  | 0.355965 | 1.503378 | 0.395    |
| ZNF229  | 0.807409 | 0.064048 | 10.17848 | 0.868589 |
| DHRS11  | 0.601228 | 0.343001 | 1.053859 | 0.075607 |
| ACACA   | 0.654271 | 0.240876 | 1.777142 | 0.405344 |
| TMEM191 | 2.757164 | 0.62433  | 12.17617 | 0.180787 |
| NR2E3   | 0.00306  | 3.02E-05 | 0.310221 | 0.014024 |
| MRM1    | 0.856247 | 0.325443 | 2.252807 | 0.753189 |

|          |          |          |          |          |
|----------|----------|----------|----------|----------|
| MRPL45   | 0.843158 | 0.425715 | 1.669933 | 0.624637 |
| OR2L8    | 0.416657 | 0.029829 | 5.819924 | 0.515196 |
| FLJ42393 | 0.367554 | 0.038962 | 3.467343 | 0.382069 |
| PLAC4    | 0.545023 | 0.109848 | 2.704199 | 0.457683 |
| SNHG4    | 0.548114 | 0.210963 | 1.42408  | 0.217105 |
| HSP90AB4 | 0.35059  | 0.046013 | 2.671268 | 0.311714 |
| WASH5P   | 1.346996 | 0.910468 | 1.992819 | 0.136067 |
| ADORA3   | 2.119688 | 0.805805 | 5.575883 | 0.127903 |
| HYMAI    | 0.878303 | 0.10465  | 7.371376 | 0.904838 |
| MIR1322  | 2.416074 | 0.229647 | 25.41903 | 0.462532 |
| MIR1910  | 0.218168 | 0.013571 | 3.507252 | 0.282632 |
| SNORD98  | 4.722644 | 0.483407 | 46.13783 | 0.181909 |
| MIR924   | 7.489543 | 0.455984 | 123.0157 | 0.15853  |
| EXOC3L2  | 1.399956 | 0.193566 | 10.12512 | 0.738926 |
| MIR555   | 0.022621 | 0.001742 | 0.293751 | 0.003774 |
| MIR130B  | 2.883107 | 0.214272 | 38.79322 | 0.424638 |
| MIR628   | 3.333908 | 0.313922 | 35.40667 | 0.317858 |
| MIR1281  | 2.444214 | 0.59174  | 10.09597 | 0.21685  |
| MIR29A   | 8.75988  | 0.639662 | 119.9625 | 0.104093 |
| SCO2     | 1.604625 | 1.076597 | 2.391631 | 0.02021  |
| MIR718   | 2.44258  | 0.190331 | 31.34636 | 0.492799 |
| TBCE     | 0.345772 | 0.128717 | 0.928846 | 0.035173 |
| ARHGAP1  | 0.397776 | 0.138942 | 1.13879  | 0.085835 |
| TOP1P1   | 3.341869 | 0.542832 | 20.57376 | 0.19322  |
| NPBWR1   | 0.161373 | 0.010267 | 2.536532 | 0.194378 |

## Supplementary file 2. Results of univariate Cox regression analysis in TARGET-LAML

| id       | HR       | HR.95L   | HR.95H   | pvalue   |
|----------|----------|----------|----------|----------|
| TSPAN6   | 1.273179 | 1.168387 | 1.38737  | 3.57E-08 |
| DPM1     | 0.990395 | 0.881917 | 1.112216 | 0.870471 |
| SCYL3    | 1.107698 | 1.00899  | 1.216063 | 0.031722 |
| FGR      | 1.077213 | 1.033198 | 1.123104 | 0.000475 |
| CFH      | 1.106723 | 1.052263 | 1.164001 | 8.19E-05 |
| FUCA2    | 1.059742 | 0.966839 | 1.161571 | 0.215139 |
| GCLC     | 1.08653  | 1.012974 | 1.165426 | 0.020319 |
| NFYA     | 1.036553 | 0.96703  | 1.111075 | 0.310815 |
| LAS1L    | 1.094153 | 0.989616 | 1.209732 | 0.07905  |
| ENPP4    | 1.132443 | 1.074406 | 1.193614 | 3.59E-06 |
| SEMA3F   | 0.945325 | 0.899498 | 0.993487 | 0.026576 |
| ANKIB1   | 1.01041  | 0.94066  | 1.085331 | 0.776597 |
| CYP51A1  | 1.046276 | 0.945147 | 1.158226 | 0.383084 |
| KRIT1    | 1.021172 | 0.928745 | 1.122798 | 0.665136 |
| RAD52    | 1.041106 | 0.9686   | 1.119039 | 0.274064 |
| BAD      | 1.379633 | 1.209752 | 1.57337  | 1.59E-06 |
| LAP3     | 1.135899 | 1.046006 | 1.233518 | 0.002452 |
| CD99     | 0.841457 | 0.797796 | 0.887508 | 2.16E-10 |
| HS3ST1   | 1.01201  | 0.918624 | 1.11489  | 0.809022 |
| MAD1L1   | 1.115428 | 1.012402 | 1.228938 | 0.027158 |
| LASP1    | 0.958239 | 0.89087  | 1.030703 | 0.251426 |
| SNX11    | 1.036727 | 0.944151 | 1.138379 | 0.449788 |
| TMEM176  | 0.915598 | 0.868342 | 0.965426 | 0.001109 |
| M6PR     | 1.061442 | 0.975345 | 1.155139 | 0.167106 |
| KLHL13   | 1.0108   | 0.950391 | 1.075049 | 0.732599 |
| ICA1     | 1.062606 | 1.00828  | 1.119858 | 0.023334 |
| DBNDD1   | 0.908013 | 0.833302 | 0.989423 | 0.027617 |
| ALS2     | 0.904495 | 0.850091 | 0.962381 | 0.001517 |
| CASP10   | 0.990018 | 0.919759 | 1.065643 | 0.789378 |
| CFLAR    | 1.028089 | 0.948168 | 1.114745 | 0.502274 |
| TFPI     | 0.929524 | 0.889017 | 0.971876 | 0.001305 |
| RBM5     | 0.981845 | 0.917469 | 1.050738 | 0.596427 |
| MTMR7    | 0.93792  | 0.871888 | 1.008952 | 0.085307 |
| SLC7A2   | 0.912179 | 0.798144 | 1.042506 | 0.177326 |
| ARF5     | 0.995095 | 0.89743  | 1.10339  | 0.925678 |
| SARM1    | 1.321203 | 1.210755 | 1.441727 | 4.01E-10 |
| POLDIP2  | 1.087081 | 0.981379 | 1.204169 | 0.10964  |
| PLXND1   | 0.930166 | 0.882016 | 0.980945 | 0.0076   |
| AK2      | 1.103155 | 1.035185 | 1.175588 | 0.00248  |
| CD38     | 1.031258 | 0.980699 | 1.084424 | 0.230106 |
| FKBP4    | 1.066216 | 1.001448 | 1.135173 | 0.044941 |
| RBM6     | 1.038726 | 0.952777 | 1.132428 | 0.38857  |
| CAMKK1   | 1.057337 | 0.982347 | 1.138051 | 0.137426 |
| RECQL    | 1.079712 | 0.994035 | 1.172773 | 0.069044 |
| HSPB6    | 0.924792 | 0.823154 | 1.038981 | 0.188102 |
| NDUFAB1  | 1.114442 | 1.010044 | 1.229629 | 0.030842 |
| PDK4     | 1.130976 | 1.069793 | 1.195659 | 1.44E-05 |
| SLC22A16 | 0.970154 | 0.912075 | 1.03193  | 0.336029 |
| ZMYND10  | 1.019396 | 0.934032 | 1.112562 | 0.666811 |
| SLC25A13 | 0.983065 | 0.910665 | 1.061221 | 0.661672 |
| ST7      | 0.95825  | 0.897068 | 1.023605 | 0.205198 |
| CDC27    | 1.037637 | 0.9667   | 1.113781 | 0.306499 |
| SLC4A1   | 0.988273 | 0.9626   | 1.014632 | 0.379752 |
| HCCS     | 1.116307 | 0.989853 | 1.258915 | 0.072863 |
| DVL2     | 1.025686 | 0.938601 | 1.120851 | 0.575314 |
| UPF1     | 0.997309 | 0.929301 | 1.070295 | 0.940403 |

|          |          |          |          |          |
|----------|----------|----------|----------|----------|
| SKAP2    | 1.074958 | 1.022926 | 1.129637 | 0.004298 |
| SLC25A5  | 1.045143 | 0.949575 | 1.15033  | 0.36682  |
| HOXA11   | 1.096874 | 1.058976 | 1.136128 | 2.55E-07 |
| POLR2J   | 1.067528 | 0.971275 | 1.17332  | 0.175284 |
| DHX33    | 1.044091 | 0.971429 | 1.122188 | 0.24106  |
| THSD7A   | 0.856685 | 0.804344 | 0.912433 | 1.52E-06 |
| LIG3     | 1.012207 | 0.946584 | 1.08238  | 0.722747 |
| RPAP3    | 1.036631 | 0.948872 | 1.132506 | 0.425381 |
| ACSM3    | 0.859338 | 0.823364 | 0.896883 | 3.71E-12 |
| CIAPIN1  | 1.20187  | 1.077634 | 1.34043  | 0.000957 |
| SPPL2B   | 1.055983 | 0.97617  | 1.142323 | 0.174314 |
| COPZ2    | 1.373616 | 1.230374 | 1.533535 | 1.61E-08 |
| PRKAR2B  | 1.150023 | 1.101179 | 1.201034 | 2.74E-10 |
| MSL3     | 0.973176 | 0.891275 | 1.062604 | 0.544389 |
| CREBBP   | 0.906687 | 0.836171 | 0.98315  | 0.017724 |
| MPO      | 0.907284 | 0.887704 | 0.927297 | 2.32E-18 |
| WDR54    | 1.296804 | 1.177356 | 1.42837  | 1.35E-07 |
| CROT     | 1.165898 | 1.065891 | 1.275288 | 0.000795 |
| ABCB4    | 1.136899 | 1.026118 | 1.25964  | 0.014172 |
| RHBDD2   | 0.907226 | 0.845369 | 0.973609 | 0.006887 |
| IBTK     | 0.973496 | 0.904196 | 1.048108 | 0.475894 |
| ZNF195   | 1.09359  | 1.005738 | 1.189117 | 0.036272 |
| MYCBP2   | 1.030755 | 0.974283 | 1.0905   | 0.292021 |
| FBXL3    | 0.96171  | 0.893028 | 1.035675 | 0.301726 |
| ITGAL    | 1.042761 | 0.988618 | 1.099869 | 0.123766 |
| PDK2     | 1.302981 | 1.190597 | 1.425973 | 8.89E-09 |
| ITGA3    | 0.99199  | 0.899861 | 1.093551 | 0.871533 |
| ZFX      | 0.9953   | 0.928911 | 1.066435 | 0.893605 |
| LAMP2    | 1.026206 | 0.94263  | 1.117192 | 0.550622 |
| ITGA2B   | 1.113327 | 1.080094 | 1.147583 | 3.84E-12 |
| GDE1     | 0.944378 | 0.861724 | 1.034959 | 0.220705 |
| CRLF1    | 1.290939 | 1.070866 | 1.556238 | 0.007407 |
| OSBPL7   | 1.11046  | 1.016467 | 1.213145 | 0.020237 |
| TMEM98   | 1.150042 | 1.056096 | 1.252346 | 0.001303 |
| YBX2     | 1.152589 | 1.046501 | 1.269431 | 0.003945 |
| MAP3K14  | 0.976574 | 0.900893 | 1.058613 | 0.56463  |
| TMEM132  | 1.081881 | 1.013861 | 1.154464 | 0.017526 |
| AP2B1    | 0.989161 | 0.913529 | 1.071054 | 0.78828  |
| ZNF263   | 0.960228 | 0.881562 | 1.045913 | 0.352049 |
| SPATA20  | 1.025074 | 0.960551 | 1.093931 | 0.455311 |
| TNFRSF12 | 0.922824 | 0.876213 | 0.971915 | 0.002388 |
| MAP3K9   | 1.134478 | 1.036457 | 1.241768 | 0.006207 |
| RALA     | 0.921219 | 0.852866 | 0.995051 | 0.03697  |
| BAIAP2L1 | 0.998427 | 0.930085 | 1.07179  | 0.965287 |
| AGK      | 1.1002   | 0.999665 | 1.210845 | 0.050806 |
| ALDH3B1  | 0.917838 | 0.867736 | 0.970833 | 0.002758 |
| TTC22    | 1.342941 | 1.147091 | 1.57223  | 0.000246 |
| PHTF2    | 0.957956 | 0.881881 | 1.040594 | 0.308946 |
| FARP2    | 1.17137  | 1.080886 | 1.269429 | 0.000115 |
| GGCT     | 1.110283 | 1.013159 | 1.216717 | 0.0251   |
| DBF4     | 1.001045 | 0.921447 | 1.087519 | 0.980294 |
| TBXA2R   | 0.893338 | 0.84624  | 0.943057 | 4.47E-05 |
| IFRD1    | 0.911361 | 0.863685 | 0.961668 | 0.00071  |
| COX10    | 1.082368 | 0.982777 | 1.19205  | 0.10801  |
| GTF2IRD1 | 1.042469 | 0.964541 | 1.126694 | 0.294081 |
| PAF1     | 0.861025 | 0.79141  | 0.936764 | 0.000504 |
| VPS41    | 1.048662 | 0.982113 | 1.119719 | 0.155488 |
| ELAC2    | 1.135336 | 1.04062  | 1.238671 | 0.004292 |

|          |          |          |          |          |
|----------|----------|----------|----------|----------|
| ARSD     | 1.006066 | 0.950672 | 1.064688 | 0.834224 |
| PNPLA4   | 0.938953 | 0.847339 | 1.040473 | 0.229158 |
| ADIPOR2  | 1.031173 | 0.960091 | 1.107518 | 0.39959  |
| CDKL3    | 1.283982 | 1.064971 | 1.548032 | 0.008802 |
| PRSS21   | 0.986738 | 0.95963  | 1.014612 | 0.347573 |
| MARK4    | 0.878785 | 0.800858 | 0.964295 | 0.006384 |
| PROM1    | 1.014736 | 0.983806 | 1.046639 | 0.354331 |
| CCDC124  | 1.118215 | 1.01415  | 1.23296  | 0.024969 |
| CEACAM2  | 1.114352 | 1.042014 | 1.191712 | 0.001568 |
| PAFAH1B1 | 0.961809 | 0.89436  | 1.034346 | 0.293875 |
| KIAA0100 | 0.994194 | 0.924076 | 1.069633 | 0.876009 |
| GAS7     | 0.909354 | 0.865024 | 0.955956 | 0.000194 |
| TRAPPC6A | 1.046951 | 0.962153 | 1.139221 | 0.287019 |
| MATK     | 0.951684 | 0.892174 | 1.015163 | 0.132792 |
| CD79B    | 1.015241 | 0.955144 | 1.079121 | 0.627065 |
| SCN4A    | 1.078579 | 0.92913  | 1.252067 | 0.320207 |
| ST7L     | 1.005957 | 0.930075 | 1.08803  | 0.882012 |
| TKTL1    | 1.032855 | 0.999016 | 1.06784  | 0.057167 |
| RPUSD1   | 0.991667 | 0.911429 | 1.078969 | 0.845878 |
| RHBDF1   | 0.943426 | 0.893025 | 0.996671 | 0.037615 |
| LUC7L    | 1.034782 | 0.957609 | 1.118175 | 0.387251 |
| CACNA2D  | 0.8705   | 0.813618 | 0.931359 | 5.76E-05 |
| BAIAP3   | 0.821323 | 0.771206 | 0.874696 | 8.92E-10 |
| PIGQ     | 1.032029 | 0.955613 | 1.114555 | 0.42185  |
| TEAD3    | 1.074406 | 1.00064  | 1.15361  | 0.047976 |
| DNAJC11  | 1.093135 | 1.007442 | 1.186116 | 0.032519 |
| MYLIP    | 0.96172  | 0.89694  | 1.031179 | 0.272624 |
| E2F2     | 1.032758 | 0.985577 | 1.082197 | 0.176684 |
| PSMB1    | 1.040949 | 0.93412  | 1.159996 | 0.467583 |
| SYN1     | 0.83921  | 0.770576 | 0.913956 | 5.66E-05 |
| JARID2   | 0.94581  | 0.88523  | 1.010535 | 0.099011 |
| CDKL5    | 1.176649 | 1.060555 | 1.305451 | 0.002146 |
| CAMK1G   | 1.140542 | 1.025092 | 1.268994 | 0.015731 |
| NADK     | 1.002807 | 0.939273 | 1.070638 | 0.933104 |
| DLEC1    | 0.995699 | 0.93431  | 1.061122 | 0.8944   |
| CYTH3    | 0.845601 | 0.787462 | 0.908034 | 3.94E-06 |
| ADAM22   | 1.060279 | 0.976306 | 1.151474 | 0.16442  |
| SYPL1    | 0.957945 | 0.877703 | 1.045522 | 0.335746 |
| CYB561   | 1.024254 | 0.953497 | 1.100262 | 0.511723 |
| SPAG9    | 0.923409 | 0.870457 | 0.979583 | 0.008178 |
| CELSR3   | 0.980383 | 0.913178 | 1.052535 | 0.584516 |
| AASS     | 1.201565 | 1.121329 | 1.287542 | 1.91E-07 |
| PLEKHG6  | 0.958941 | 0.903186 | 1.018138 | 0.170125 |
| SS18L2   | 1.260102 | 1.116909 | 1.421654 | 0.000172 |
| MPND     | 1.00756  | 0.917282 | 1.106723 | 0.875046 |
| MGST1    | 0.89009  | 0.853863 | 0.927853 | 3.97E-08 |
| CRY1     | 1.083592 | 1.02092  | 1.150111 | 0.008264 |
| PGLYRP1  | 0.989935 | 0.96379  | 1.01679  | 0.458859 |
| NFIX     | 1.009669 | 0.957052 | 1.065179 | 0.724547 |
| ST3GAL1  | 1.025835 | 0.949416 | 1.108405 | 0.51842  |
| MMP25    | 0.965391 | 0.92086  | 1.012076 | 0.143804 |
| IL32     | 1.056895 | 0.988282 | 1.130271 | 0.106142 |
| PKD1     | 0.964717 | 0.907575 | 1.025458 | 0.248903 |
| MED24    | 1.065549 | 0.968672 | 1.172114 | 0.191727 |
| RHOBTB2  | 1.210605 | 1.115415 | 1.313919 | 4.78E-06 |
| HEATR5B  | 1.004961 | 0.945408 | 1.068266 | 0.873837 |
| SEC62    | 0.953289 | 0.868309 | 1.046586 | 0.315304 |
| RPS20    | 0.863273 | 0.795253 | 0.93711  | 0.000446 |

|          |          |          |          |          |
|----------|----------|----------|----------|----------|
| CSDE1    | 0.894833 | 0.828676 | 0.966273 | 0.004576 |
| UBE3C    | 0.98487  | 0.91704  | 1.057717 | 0.675405 |
| REV3L    | 0.917869 | 0.860925 | 0.978579 | 0.008726 |
| MASP2    | 0.970505 | 0.914998 | 1.02938  | 0.319096 |
| FAM76A   | 1.209486 | 1.090334 | 1.34166  | 0.000325 |
| TRAF3IP3 | 1.049053 | 0.981658 | 1.121076 | 0.157503 |
| POMT2    | 0.983062 | 0.895549 | 1.079126 | 0.719501 |
| VTA1     | 1.142712 | 1.031909 | 1.265413 | 0.01036  |
| MLXIPL   | 1.215767 | 1.108761 | 1.3331   | 3.23E-05 |
| BAZ1B    | 0.983518 | 0.904816 | 1.069066 | 0.696135 |
| RANBP9   | 0.854296 | 0.793556 | 0.919685 | 2.85E-05 |
| ETV7     | 1.233208 | 1.139151 | 1.33503  | 2.24E-07 |
| DYRK4    | 1.338485 | 1.161498 | 1.542441 | 5.60E-05 |
| ZNF207   | 0.93234  | 0.858441 | 1.0126   | 0.096359 |
| UQCRC1   | 1.127016 | 1.01371  | 1.252986 | 0.026977 |
| STARD3NL | 0.847006 | 0.772218 | 0.929038 | 0.000431 |
| CD9      | 1.010525 | 0.967348 | 1.055629 | 0.638412 |
| NCAPD2   | 1.066508 | 0.994093 | 1.144198 | 0.072681 |
| IFFO1    | 1.023268 | 0.952145 | 1.099703 | 0.531455 |
| GIPR     | 1.004528 | 0.94077  | 1.072608 | 0.892583 |
| PHF7     | 1.116848 | 1.024851 | 1.217104 | 0.011748 |
| SEMA3G   | 1.208366 | 1.126961 | 1.295651 | 1.04E-07 |
| NISCH    | 1.135777 | 1.05137  | 1.22696  | 0.001232 |
| STAB1    | 0.988169 | 0.959904 | 1.017266 | 0.421508 |
| FUZ      | 1.093161 | 0.987902 | 1.209636 | 0.084646 |
| SLC6A13  | 1.111546 | 1.043135 | 1.184444 | 0.001102 |
| IDS      | 0.987785 | 0.8988   | 1.08558  | 0.798592 |
| PRSS3    | 0.892352 | 0.776015 | 1.02613  | 0.110034 |
| ZNF200   | 1.087552 | 0.976764 | 1.210906 | 0.12575  |
| CD4      | 1.076177 | 1.037098 | 1.116729 | 0.0001   |
| LRRRC23  | 1.120895 | 1.00618  | 1.248689 | 0.038283 |
| BTK      | 0.946552 | 0.891041 | 1.005521 | 0.074845 |
| HFE      | 1.136792 | 0.984517 | 1.312619 | 0.080584 |
| SCMH1    | 0.800773 | 0.746976 | 0.858445 | 3.81E-10 |
| FYN      | 1.016899 | 0.95767  | 1.079791 | 0.584159 |
| HIVEP2   | 0.945435 | 0.894843 | 0.998888 | 0.045541 |
| LYPLA2   | 1.17598  | 1.054667 | 1.311247 | 0.003522 |
| CLCN6    | 0.924481 | 0.862102 | 0.991374 | 0.027593 |
| MRC2     | 1.058218 | 1.013086 | 1.10536  | 0.01094  |
| TSPAN9   | 0.866692 | 0.787248 | 0.954153 | 0.003537 |
| BTBD7    | 1.009927 | 0.925204 | 1.102407 | 0.825124 |
| APBA3    | 1.221436 | 1.093457 | 1.364393 | 0.000397 |
| MKS1     | 1.076194 | 0.975584 | 1.18718  | 0.142552 |
| ABHD5    | 0.985405 | 0.925778 | 1.048873 | 0.644325 |
| AKAP8L   | 0.929708 | 0.856817 | 1.008799 | 0.080176 |
| MBTD1    | 0.962691 | 0.899014 | 1.030878 | 0.276157 |
| UTP18    | 0.926847 | 0.847624 | 1.013475 | 0.095644 |
| RNF216   | 1.003057 | 0.934663 | 1.076455 | 0.932492 |
| TTC19    | 0.925802 | 0.855475 | 1.001911 | 0.0558   |
| PTBP1    | 0.963339 | 0.87885  | 1.055951 | 0.42516  |
| DPF1     | 1.170996 | 1.030878 | 1.330159 | 0.015197 |
| LARS2    | 1.017624 | 0.939044 | 1.102779 | 0.670048 |
| PIK3C2A  | 0.962759 | 0.902134 | 1.027459 | 0.252763 |
| PLAUR    | 1.032846 | 0.980718 | 1.087744 | 0.221297 |
| ANLN     | 1.058377 | 0.99796  | 1.122453 | 0.05851  |
| WIZ      | 1.037474 | 0.943941 | 1.140275 | 0.445357 |
| RABGAP1  | 1.057242 | 0.982542 | 1.137622 | 0.136522 |
| QPCTL    | 0.969422 | 0.894537 | 1.050575 | 0.448978 |



|          |          |          |          |          |
|----------|----------|----------|----------|----------|
| PPP5C    | 1.075743 | 0.996956 | 1.160758 | 0.059918 |
| CEP68    | 0.994992 | 0.932736 | 1.061403 | 0.878948 |
| MAP4K3   | 0.959896 | 0.900164 | 1.023591 | 0.211797 |
| ZBTB32   | 1.094779 | 0.995866 | 1.203516 | 0.0609   |
| TYROBP   | 0.985212 | 0.937177 | 1.035709 | 0.559098 |
| TMEM159  | 1.088419 | 0.994304 | 1.191442 | 0.066333 |
| BRCA1    | 1.084689 | 1.02123  | 1.152091 | 0.008218 |
| ERCC1    | 1.166815 | 1.043439 | 1.304779 | 0.006816 |
| CD22     | 1.024382 | 0.965841 | 1.08647  | 0.422359 |
| SEMA3B   | 0.968281 | 0.902734 | 1.038587 | 0.367433 |
| MBTPS2   | 1.053538 | 0.957431 | 1.159293 | 0.285238 |
| PRICKLE3 | 1.102078 | 0.993046 | 1.223081 | 0.067448 |
| LTF      | 1.006248 | 0.982816 | 1.030238 | 0.604399 |
| EXTL3    | 1.078985 | 0.997126 | 1.167563 | 0.058963 |
| ELOVL5   | 1.078681 | 0.993126 | 1.171606 | 0.072436 |
| ALOX5    | 0.963945 | 0.923633 | 1.006017 | 0.092038 |
| CALCOCO  | 1.111108 | 1.022377 | 1.207539 | 0.013097 |
| UBR7     | 1.183038 | 1.08296  | 1.292364 | 0.000194 |
| MAP4K5   | 0.941924 | 0.871816 | 1.01767  | 0.129493 |
| EHD3     | 0.949932 | 0.898662 | 1.004127 | 0.069603 |
| PSMC4    | 1.04113  | 0.930687 | 1.164679 | 0.481138 |
| MAN2B2   | 1.034328 | 0.955761 | 1.119354 | 0.402378 |
| SLC25A39 | 1.068126 | 1.005955 | 1.13414  | 0.031238 |
| MVP      | 1.073539 | 0.993533 | 1.159989 | 0.072531 |
| NUB1     | 0.949978 | 0.870785 | 1.036374 | 0.247895 |
| PGM3     | 1.038377 | 0.966375 | 1.115743 | 0.304371 |
| RWDD2A   | 1.075267 | 0.967469 | 1.195075 | 0.17818  |
| CLK1     | 0.923664 | 0.863538 | 0.987976 | 0.020767 |
| POLR3B   | 1.044735 | 0.966767 | 1.12899  | 0.268774 |
| ANGEL1   | 1.182266 | 1.088694 | 1.283879 | 6.89E-05 |
| RNF14    | 1.074683 | 0.987339 | 1.169754 | 0.095844 |
| DNASE1L1 | 1.078694 | 0.962853 | 1.208472 | 0.191252 |
| DDX11    | 1.086759 | 1.008457 | 1.171141 | 0.029207 |
| HEBP1    | 0.982555 | 0.887486 | 1.087809 | 0.734648 |
| GPRC5A   | 0.984244 | 0.883585 | 1.09637  | 0.772948 |
| MAMLD1   | 1.090911 | 1.011756 | 1.17626  | 0.02357  |
| CD6      | 0.97986  | 0.935278 | 1.026567 | 0.3918   |
| TACC3    | 1.01588  | 0.932859 | 1.106289 | 0.717201 |
| POLA2    | 1.254595 | 1.131854 | 1.390647 | 1.58E-05 |
| ZC3H3    | 0.859416 | 0.791726 | 0.932893 | 0.000295 |
| CAPN1    | 1.009827 | 0.923318 | 1.10444  | 0.830544 |
| MDH1     | 1.163238 | 1.054914 | 1.282686 | 0.00243  |
| SLC30A9  | 1.0782   | 0.987059 | 1.177756 | 0.09474  |
| MTMR11   | 1.041901 | 0.995652 | 1.090298 | 0.076416 |
| COX15    | 1.119475 | 1.030172 | 1.21652  | 0.007796 |
| CCDC88C  | 0.903939 | 0.838721 | 0.974227 | 0.008208 |
| YAF2     | 0.979185 | 0.916412 | 1.046258 | 0.533771 |
| ZMYND11  | 0.968086 | 0.899736 | 1.041628 | 0.385273 |
| WAS      | 0.984796 | 0.909772 | 1.066006 | 0.704722 |
| DPEP1    | 1.057176 | 0.988186 | 1.130983 | 0.106351 |
| BID      | 1.191844 | 1.072178 | 1.324866 | 0.00115  |
| MATR3    | 1.006435 | 0.948243 | 1.068199 | 0.832819 |
| NPC1L1   | 1.025514 | 0.916587 | 1.147386 | 0.660124 |
| XYLT2    | 1.131683 | 1.048863 | 1.221042 | 0.001421 |
| NUDCD3   | 1.086397 | 1.004226 | 1.175293 | 0.038919 |
| GLT8D1   | 1.092976 | 1.003824 | 1.190045 | 0.040573 |
| ATP2C1   | 0.944785 | 0.889004 | 1.004066 | 0.067359 |
| SLC38A5  | 1.024931 | 0.959587 | 1.094724 | 0.463775 |

|          |          |          |          |          |
|----------|----------|----------|----------|----------|
| RALBP1   | 0.93987  | 0.858585 | 1.028851 | 0.179053 |
| RUFY3    | 0.939436 | 0.87589  | 1.007593 | 0.080416 |
| SLC11A1  | 0.998588 | 0.957868 | 1.041038 | 0.946956 |
| WWTR1    | 1.316677 | 1.090409 | 1.589898 | 0.004241 |
| AGPS     | 0.969776 | 0.901517 | 1.043203 | 0.409855 |
| TTC27    | 1.035874 | 0.975019 | 1.100528 | 0.253878 |
| ZNF582   | 1.037929 | 0.911758 | 1.18156  | 0.573458 |
| VSIG2    | 1.15881  | 1.092554 | 1.229084 | 9.26E-07 |
| PHLDB1   | 1.2661   | 1.173454 | 1.36606  | 1.16E-09 |
| MARCO    | 0.951528 | 0.901257 | 1.004604 | 0.072799 |
| PRDM11   | 0.997197 | 0.92546  | 1.074493 | 0.941249 |
| CD74     | 0.974074 | 0.929718 | 1.020545 | 0.269292 |
| HGF      | 0.872574 | 0.838765 | 0.907745 | 1.37E-11 |
| ZRANB1   | 0.902933 | 0.840151 | 0.970407 | 0.005488 |
| NCDN     | 1.060617 | 0.991015 | 1.135107 | 0.089255 |
| ZFP64    | 1.190958 | 1.091629 | 1.299324 | 8.39E-05 |
| MNAT1    | 1.023199 | 0.938611 | 1.115411 | 0.602412 |
| SAMD4A   | 1.055652 | 0.929756 | 1.198596 | 0.403225 |
| RUNX3    | 1.110349 | 1.060604 | 1.162428 | 7.61E-06 |
| PLEKHB1  | 1.035386 | 0.965189 | 1.110688 | 0.33164  |
| SERPINB1 | 0.93228  | 0.874059 | 0.994379 | 0.033065 |
| SPAST    | 0.994531 | 0.909549 | 1.087454 | 0.904227 |
| OSBPL5   | 0.976877 | 0.924455 | 1.032272 | 0.405803 |
| AQR      | 1.042882 | 0.96137  | 1.131305 | 0.311927 |
| FHL1     | 1.08152  | 1.032715 | 1.132632 | 0.00088  |
| NLRP2    | 1.009114 | 0.95579  | 1.065413 | 0.743252 |
| SLC45A4  | 1.144416 | 1.073918 | 1.219542 | 3.21E-05 |
| RNF10    | 0.908853 | 0.839713 | 0.983686 | 0.017913 |
| ZNF839   | 1.000326 | 0.918772 | 1.089118 | 0.994011 |
| ZDHHC6   | 1.155893 | 1.049048 | 1.273621 | 0.003416 |
| GRAMD1B  | 1.119084 | 1.056034 | 1.185899 | 0.000143 |
| RNH1     | 0.967919 | 0.900826 | 1.040009 | 0.373659 |
| NDUFS1   | 1.076398 | 0.987858 | 1.172874 | 0.092757 |
| RB1CC1   | 0.953784 | 0.90196  | 1.008584 | 0.096898 |
| ERP44    | 0.987433 | 0.885313 | 1.101332 | 0.82038  |
| ALAS1    | 1.002022 | 0.931527 | 1.077852 | 0.956717 |
| BIRC3    | 1.023756 | 0.965169 | 1.085898 | 0.434882 |
| AKAP11   | 1.01086  | 0.948993 | 1.07676  | 0.737467 |
| GLRX2    | 1.265471 | 1.127946 | 1.419764 | 6.04E-05 |
| SNAPC1   | 1.039084 | 0.951094 | 1.135213 | 0.395737 |
| DERA     | 0.931157 | 0.859224 | 1.009112 | 0.082063 |
| STRAP    | 0.853548 | 0.779187 | 0.935006 | 0.000662 |
| ABCC2    | 1.063888 | 0.973979 | 1.162097 | 0.169223 |
| DEF6     | 1.076949 | 0.98643  | 1.175774 | 0.097936 |
| PLEKHO1  | 0.941614 | 0.872978 | 1.015646 | 0.119252 |
| GCLM     | 1.139744 | 1.070828 | 1.213095 | 3.95E-05 |
| UBR2     | 1.008593 | 0.942095 | 1.079785 | 0.805769 |
| EHD2     | 1.022686 | 0.974896 | 1.072819 | 0.358239 |
| DEPDC1   | 1.151022 | 1.064608 | 1.24445  | 0.000412 |
| CCDC28A  | 0.991016 | 0.901738 | 1.089134 | 0.851386 |
| RRAGD    | 0.858243 | 0.807441 | 0.912242 | 9.09E-07 |
| HSF2     | 0.907538 | 0.850747 | 0.96812  | 0.003254 |
| PHF20    | 0.927426 | 0.850728 | 1.011039 | 0.087138 |
| NR1H3    | 0.968133 | 0.896034 | 1.046033 | 0.412111 |
| TYMP     | 0.995311 | 0.944381 | 1.048988 | 0.860783 |
| NCAPH2   | 1.078307 | 0.981186 | 1.18504  | 0.117451 |
| TOMM34   | 1.101796 | 0.990296 | 1.22585  | 0.07494  |
| SEC63    | 0.951306 | 0.874466 | 1.034897 | 0.245356 |

|          |          |          |          |          |
|----------|----------|----------|----------|----------|
| KPNA6    | 0.94354  | 0.869948 | 1.023356 | 0.160702 |
| VIM      | 1.016622 | 0.960182 | 1.076379 | 0.571604 |
| FAS      | 1.017871 | 0.947788 | 1.093137 | 0.626492 |
| RNASET2  | 0.868928 | 0.80441  | 0.938622 | 0.000358 |
| CD44     | 0.914843 | 0.854798 | 0.979105 | 0.010182 |
| AGPAT4   | 1.06782  | 1.002452 | 1.13745  | 0.041756 |
| SLAMF7   | 1.021529 | 0.954113 | 1.093708 | 0.540878 |
| BTN3A1   | 1.045205 | 0.977009 | 1.118162 | 0.19903  |
| MIPEP    | 1.117992 | 1.032346 | 1.210743 | 0.006092 |
| PRKCH    | 0.990391 | 0.936657 | 1.047208 | 0.734432 |
| IFNGR1   | 0.997631 | 0.926406 | 1.074333 | 0.949962 |
| B4GALT7  | 0.997588 | 0.907247 | 1.096924 | 0.960225 |
| SH2D2A   | 1.020369 | 0.956482 | 1.088524 | 0.541032 |
| VRK2     | 1.058747 | 0.971625 | 1.15368  | 0.192589 |
| TNFRSF1B | 1.016671 | 0.971461 | 1.063986 | 0.476215 |
| VEZT     | 0.950588 | 0.881944 | 1.024575 | 0.185138 |
| POU2F2   | 1.013136 | 0.955516 | 1.074231 | 0.66223  |
| BRD9     | 1.108453 | 1.008565 | 1.218233 | 0.0326   |
| SNX1     | 0.960494 | 0.891045 | 1.035357 | 0.292528 |
| TBPL1    | 1.076578 | 0.979267 | 1.183558 | 0.126879 |
| ARNTL2   | 1.101284 | 1.027233 | 1.180673 | 0.006598 |
| BCLAF1   | 0.961066 | 0.893904 | 1.033275 | 0.282647 |
| SLC39A9  | 1.102013 | 1.016739 | 1.194438 | 0.018081 |
| ANK1     | 1.019052 | 0.985991 | 1.053221 | 0.262057 |
| TFB1M    | 1.075707 | 0.997763 | 1.159739 | 0.057223 |
| RABEP1   | 0.957309 | 0.884791 | 1.03577  | 0.277688 |
| HMGB3    | 1.132158 | 1.040619 | 1.231749 | 0.003907 |
| NUP160   | 1.052174 | 0.976517 | 1.133693 | 0.181607 |
| BAK1     | 0.943556 | 0.866099 | 1.027939 | 0.183705 |
| IKZF2    | 0.916677 | 0.873114 | 0.962413 | 0.000461 |
| GRN      | 1.052657 | 1.003065 | 1.104701 | 0.037136 |
| FAM13B   | 0.954109 | 0.892406 | 1.020077 | 0.168449 |
| CENPQ    | 1.064298 | 0.977368 | 1.158959 | 0.151742 |
| RANBP3   | 0.965783 | 0.888229 | 1.050109 | 0.414969 |
| ARID4A   | 0.925496 | 0.863689 | 0.991726 | 0.028123 |
| PNPLA6   | 1.096979 | 1.011837 | 1.189285 | 0.024741 |
| IFT88    | 1.09122  | 0.988246 | 1.204925 | 0.084318 |
| ALG1     | 1.216106 | 1.110128 | 1.332201 | 2.60E-05 |
| ZCCHC8   | 0.974393 | 0.901653 | 1.053002 | 0.512277 |
| ABCF2    | 1.162689 | 1.050096 | 1.287355 | 0.003725 |
| CHPF2    | 0.946204 | 0.885093 | 1.011534 | 0.104526 |
| LRRC7    | 1.166638 | 1.027444 | 1.324689 | 0.017424 |
| FUT8     | 1.119352 | 1.05024  | 1.193013 | 0.000525 |
| UBA6     | 0.943166 | 0.88679  | 1.003125 | 0.062779 |
| GAB2     | 0.82373  | 0.778581 | 0.871498 | 1.56E-11 |
| ATP6V0A1 | 1.065667 | 1.004569 | 1.13048  | 0.034747 |
| PIAS1    | 0.95349  | 0.878365 | 1.03504  | 0.255349 |
| SLC4A7   | 0.999669 | 0.946502 | 1.055823 | 0.990536 |
| APBA2    | 1.098285 | 1.048817 | 1.150087 | 6.69E-05 |
| MAP2K3   | 0.878198 | 0.817518 | 0.943381 | 0.000377 |
| TMSB10   | 0.965158 | 0.913612 | 1.019612 | 0.205368 |
| ASTE1    | 1.086916 | 0.998842 | 1.182756 | 0.053225 |
| RNF19A   | 1.057208 | 0.982111 | 1.138047 | 0.138923 |
| PEX3     | 1.081294 | 0.994942 | 1.175141 | 0.065688 |
| GABARAPI | 1.091767 | 0.991443 | 1.202243 | 0.074226 |
| SH3YL1   | 1.024577 | 0.935103 | 1.122612 | 0.602526 |
| FAM136A  | 1.109123 | 0.996634 | 1.234309 | 0.057674 |
| VCL      | 1.051749 | 0.983016 | 1.125288 | 0.143412 |

|         |          |          |          |          |
|---------|----------|----------|----------|----------|
| DEPDC1B | 1.157696 | 1.081904 | 1.238798 | 2.25E-05 |
| DAPK2   | 1.059556 | 0.985063 | 1.139683 | 0.119864 |
| NSMAF   | 0.941973 | 0.874477 | 1.014679 | 0.115066 |
| STAP1   | 0.900611 | 0.852669 | 0.951249 | 0.000176 |
| TIMP2   | 0.950284 | 0.892731 | 1.011548 | 0.109651 |
| RFC1    | 0.97875  | 0.908694 | 1.054207 | 0.570821 |
| TBC1D23 | 0.940303 | 0.881207 | 1.003362 | 0.063083 |
| CUL3    | 0.917621 | 0.855635 | 0.984099 | 0.01599  |
| MYOM2   | 1.158626 | 1.048819 | 1.27993  | 0.003753 |
| CYP46A1 | 0.919032 | 0.821172 | 1.028554 | 0.1416   |
| ZZZ3    | 1.018255 | 0.941291 | 1.101512 | 0.651891 |
| USP2    | 1.044771 | 0.988047 | 1.104752 | 0.124106 |
| TUBG2   | 1.228773 | 1.142326 | 1.321763 | 3.11E-08 |
| RPL26L1 | 1.142811 | 1.022285 | 1.277548 | 0.018897 |
| FLT4    | 0.837202 | 0.791426 | 0.885625 | 5.87E-10 |
| NSUN2   | 1.020928 | 0.942713 | 1.105633 | 0.610536 |
| FBXO42  | 0.944978 | 0.873652 | 1.022128 | 0.157547 |
| MFAP3   | 1.088338 | 1.000013 | 1.184465 | 0.049965 |
| MRI1    | 1.057886 | 0.976567 | 1.145975 | 0.167918 |
| METTL1  | 1.111621 | 1.02378  | 1.206999 | 0.011752 |
| AGA     | 1.034416 | 0.936397 | 1.142695 | 0.505302 |
| PI4K2B  | 1.050219 | 0.96743  | 1.140092 | 0.242166 |
| MAT2B   | 1.084054 | 0.997575 | 1.17803  | 0.057076 |
| EDC4    | 0.949047 | 0.885053 | 1.017668 | 0.142033 |
| TRIO    | 0.842065 | 0.804118 | 0.881803 | 2.74E-13 |
| VCAN    | 1.02363  | 0.994899 | 1.053192 | 0.107864 |
| CLEC16A | 1.030523 | 0.956012 | 1.110842 | 0.432347 |
| MSR1    | 1.082969 | 1.014619 | 1.155924 | 0.016562 |
| CDH1    | 1.070084 | 1.005532 | 1.13878  | 0.032864 |
| ZFYVE16 | 0.952476 | 0.886035 | 1.0239   | 0.186916 |
| RAI14   | 1.268887 | 1.136391 | 1.41683  | 2.31E-05 |
| PNKP    | 1.128775 | 1.025054 | 1.242992 | 0.013773 |
| BEST2   | 0.875783 | 0.737975 | 1.039325 | 0.128912 |
| PHLPP2  | 1.078494 | 1.003747 | 1.158808 | 0.039206 |
| STAU2   | 1.092709 | 1.015398 | 1.175907 | 0.017879 |
| CTNS    | 1.143982 | 1.043739 | 1.253853 | 0.004041 |
| RTN4R   | 0.880148 | 0.83279  | 0.930199 | 6.07E-06 |
| PHF23   | 1.011381 | 0.919851 | 1.112017 | 0.81513  |
| INPP4A  | 1.041121 | 0.980845 | 1.105101 | 0.185386 |
| RAB27B  | 1.138145 | 1.084874 | 1.194032 | 1.22E-07 |
| PSMA4   | 1.235711 | 1.102706 | 1.384759 | 0.00027  |
| MYO16   | 1.068147 | 0.988045 | 1.154743 | 0.097406 |
| LSG1    | 1.031815 | 0.954604 | 1.115272 | 0.429977 |
| PARP3   | 1.29314  | 1.198582 | 1.395157 | 3.24E-11 |
| TNC     | 1.044235 | 0.960034 | 1.135821 | 0.312923 |
| THAP3   | 1.01427  | 0.923411 | 1.11407  | 0.767294 |
| TDP1    | 1.012181 | 0.932424 | 1.098761 | 0.77248  |
| AIFM2   | 1.316036 | 1.21444  | 1.426132 | 2.09E-11 |
| SPATA7  | 0.972771 | 0.861724 | 1.09813  | 0.655327 |
| MED17   | 0.969213 | 0.901811 | 1.041653 | 0.395151 |
| RETSAT  | 1.026911 | 0.951418 | 1.108394 | 0.495474 |
| CAPG    | 1.147933 | 1.094871 | 1.203567 | 1.11E-08 |
| AP2S1   | 1.139595 | 1.039558 | 1.24926  | 0.005311 |
| TG      | 1.282255 | 1.15332  | 1.425604 | 4.26E-06 |
| ADAM28  | 0.927307 | 0.878058 | 0.979318 | 0.006718 |
| DCUN1D1 | 1.01602  | 0.947483 | 1.089514 | 0.655586 |
| LCP2    | 1.159056 | 1.060097 | 1.267253 | 0.001188 |
| TRIT1   | 1.018837 | 0.948703 | 1.094157 | 0.608056 |

|          |          |          |          |          |
|----------|----------|----------|----------|----------|
| ADRB1    | 1.015696 | 0.967582 | 1.066203 | 0.529358 |
| CUL7     | 1.045891 | 0.964518 | 1.134129 | 0.277588 |
| CTNNA1   | 1.014284 | 0.94727  | 1.086039 | 0.684245 |
| PHKA2    | 0.979674 | 0.91387  | 1.050215 | 0.562675 |
| CNTLN    | 1.129047 | 1.045281 | 1.219525 | 0.002029 |
| HSPA5    | 0.900344 | 0.84716  | 0.956868 | 0.000727 |
| DSG2     | 1.147951 | 1.086755 | 1.212593 | 7.95E-07 |
| GEMIN8   | 0.97754  | 0.889877 | 1.073838 | 0.635593 |
| OFD1     | 1.078076 | 1.000962 | 1.161131 | 0.047104 |
| GPM6B    | 0.946139 | 0.893853 | 1.001483 | 0.05628  |
| PREX2    | 1.082805 | 1.003674 | 1.168176 | 0.03991  |
| WDR37    | 0.971483 | 0.902561 | 1.045667 | 0.440953 |
| YTHDC2   | 1.012602 | 0.938026 | 1.093107 | 0.748327 |
| CTPS2    | 1.030789 | 0.955159 | 1.112408 | 0.435411 |
| ATP6V1H  | 0.986593 | 0.904599 | 1.076018 | 0.760435 |
| POLR2B   | 0.981216 | 0.91365  | 1.053778 | 0.602409 |
| ARAP2    | 0.967613 | 0.918671 | 1.019163 | 0.213791 |
| TPR      | 1.020888 | 0.944835 | 1.103062 | 0.600722 |
| CP       | 0.973949 | 0.871942 | 1.08789  | 0.640054 |
| DTNBP1   | 1.046169 | 0.95562  | 1.145299 | 0.328486 |
| XK       | 1.037547 | 0.997811 | 1.078865 | 0.064319 |
| SCML1    | 1.068976 | 1.012405 | 1.128708 | 0.016199 |
| WWC3     | 0.97563  | 0.915008 | 1.040267 | 0.450966 |
| ARHGAP6  | 1.158013 | 1.072781 | 1.250016 | 0.000169 |
| FAM184B  | 0.935224 | 0.863327 | 1.013107 | 0.10082  |
| MAP4     | 0.94263  | 0.870412 | 1.020842 | 0.146292 |
| GOPC     | 1.123723 | 1.039289 | 1.215016 | 0.003423 |
| USP28    | 0.962023 | 0.887068 | 1.04331  | 0.349526 |
| HDAC9    | 1.081534 | 1.024425 | 1.141827 | 0.004629 |
| TSPAN17  | 1.194165 | 1.115362 | 1.278535 | 3.50E-07 |
| NOP16    | 1.171805 | 1.058405 | 1.297354 | 0.002266 |
| CC2D2A   | 1.078828 | 1        | 1.163871 | 0.050001 |
| RRM2B    | 1.058985 | 0.975618 | 1.149476 | 0.170709 |
| ZNF800   | 0.946877 | 0.875072 | 1.024573 | 0.174899 |
| TNFRSF17 | 1.066769 | 0.964293 | 1.180136 | 0.209721 |
| SNX29    | 0.905199 | 0.836997 | 0.978959 | 0.012701 |
| MRPS10   | 1.053507 | 0.958351 | 1.158112 | 0.280504 |
| RSF1     | 0.944082 | 0.871556 | 1.022643 | 0.158261 |
| VPS13D   | 1.003099 | 0.944247 | 1.065619 | 0.920104 |
| FAM120A  | 1.037352 | 0.951659 | 1.130761 | 0.4045   |
| R3HDM1   | 1.013182 | 0.912967 | 1.124397 | 0.805341 |
| COL9A2   | 0.997112 | 0.939973 | 1.057724 | 0.923468 |
| KITLG    | 1.23434  | 1.071582 | 1.421817 | 0.00352  |
| ERCC8    | 1.019005 | 0.924168 | 1.123573 | 0.705637 |
| ADAMTS6  | 1.128771 | 1.059169 | 1.202947 | 0.000191 |
| H6PD     | 1.042584 | 0.983783 | 1.104898 | 0.159142 |
| VAMP3    | 0.967037 | 0.880174 | 1.062471 | 0.485161 |
| PER3     | 1.244572 | 1.145403 | 1.352327 | 2.41E-07 |
| UTS2     | 1.097068 | 1.020787 | 1.17905  | 0.011752 |
| TNFRSF9  | 1.067974 | 0.98958  | 1.152579 | 0.090898 |
| LTBP1    | 1.049244 | 1.012894 | 1.086899 | 0.007537 |
| RCN1     | 0.898273 | 0.828685 | 0.973705 | 0.009116 |
| ELN      | 1.080427 | 0.991384 | 1.177467 | 0.077939 |
| RFC2     | 1.276982 | 1.154774 | 1.412124 | 1.90E-06 |
| ARID1B   | 0.943967 | 0.878962 | 1.013779 | 0.113186 |
| CLPTM1L  | 1.194905 | 1.091926 | 1.307595 | 0.000108 |
| NEDD4L   | 1.268548 | 1.16827  | 1.377433 | 1.50E-08 |
| FOXP3    | 1.089395 | 0.994505 | 1.193338 | 0.065554 |

|          |          |          |          |          |
|----------|----------|----------|----------|----------|
| PPP1R3F  | 1.128163 | 1.008526 | 1.261992 | 0.034997 |
| HEXB     | 1.031513 | 0.959111 | 1.10938  | 0.403383 |
| PTCD2    | 1.12827  | 1.029176 | 1.236904 | 0.010078 |
| DKK3     | 1.08152  | 0.947193 | 1.234897 | 0.24679  |
| ARHGEF5  | 1.259853 | 1.14339  | 1.388179 | 3.05E-06 |
| NFE2L3   | 0.99829  | 0.952881 | 1.045862 | 0.942546 |
| LIMA1    | 1.151941 | 1.067404 | 1.243173 | 0.000275 |
| LETMD1   | 0.937782 | 0.845859 | 1.039695 | 0.222311 |
| SLC4A8   | 1.00462  | 0.915952 | 1.101872 | 0.92211  |
| LAMC3    | 0.819983 | 0.749045 | 0.89764  | 1.72E-05 |
| PTGER3   | 1.056594 | 0.97978  | 1.139431 | 0.152854 |
| MAPK9    | 1.049585 | 0.952543 | 1.156514 | 0.328219 |
| COL23A1  | 1.031467 | 0.991078 | 1.073503 | 0.128458 |
| BCAR1    | 1.218175 | 1.020599 | 1.453999 | 0.028831 |
| FAM160A  | 1.015654 | 0.937713 | 1.100074 | 0.702985 |
| HERPUD1  | 1.004986 | 0.932467 | 1.083146 | 0.896434 |
| HOMER3   | 0.929501 | 0.883412 | 0.977994 | 0.004839 |
| RAD51    | 1.138114 | 1.050327 | 1.233239 | 0.001584 |
| POLQ     | 1.091953 | 1.025825 | 1.162345 | 0.005782 |
| PIK3CB   | 1.002988 | 0.935972 | 1.074803 | 0.932602 |
| CYBA     | 0.956419 | 0.88525  | 1.033309 | 0.258715 |
| THOC3    | 1.241832 | 1.123343 | 1.372819 | 2.30E-05 |
| HEBP2    | 1.07253  | 0.970414 | 1.185391 | 0.170173 |
| MPHOSP1  | 1.054455 | 0.984102 | 1.129837 | 0.132307 |
| PLEKHA5  | 0.857043 | 0.802621 | 0.915155 | 4.05E-06 |
| PRSS8    | 0.995193 | 0.894329 | 1.107433 | 0.929578 |
| RRP12    | 0.958299 | 0.901618 | 1.018542 | 0.170893 |
| FNIP2    | 1.091495 | 1.027274 | 1.159731 | 0.004659 |
| TTC17    | 1.004966 | 0.9337   | 1.081672 | 0.894982 |
| ALX4     | 0.882982 | 0.790911 | 0.98577  | 0.026756 |
| FOXN3    | 1.004995 | 0.918159 | 1.100043 | 0.913949 |
| AKR7A2   | 1.10521  | 1.03023  | 1.185648 | 0.005257 |
| MRTO4    | 1.143185 | 1.044957 | 1.250648 | 0.003508 |
| NNAT     | 1.038982 | 0.981634 | 1.099681 | 0.186809 |
| USE1     | 0.968139 | 0.858186 | 1.092179 | 0.59859  |
| MCF2L2   | 1.159714 | 0.972433 | 1.383065 | 0.099171 |
| NRIP2    | 1.042833 | 0.971629 | 1.119255 | 0.245099 |
| LAMA3    | 1.296399 | 1.17641  | 1.428627 | 1.62E-07 |
| ANAPC4   | 1.114761 | 1.021568 | 1.216456 | 0.014727 |
| KCNQ1    | 1.114369 | 1.059153 | 1.172464 | 2.96E-05 |
| TRAPPC3  | 1.243365 | 1.103831 | 1.400538 | 0.000335 |
| THRAP3   | 1.028221 | 0.949669 | 1.11327  | 0.492491 |
| PHPT1    | 1.141144 | 1.045637 | 1.245373 | 0.00307  |
| ENTPD2   | 1.196375 | 1.031429 | 1.387699 | 0.017846 |
| LY75     | 0.977673 | 0.908907 | 1.051641 | 0.543974 |
| ARID4B   | 0.97252  | 0.902701 | 1.047739 | 0.463509 |
| OPN3     | 1.189411 | 1.08277  | 1.306556 | 0.000296 |
| SDCCAG8  | 0.911987 | 0.848072 | 0.98072  | 0.012952 |
| HHAT     | 1.07285  | 0.997799 | 1.153545 | 0.057378 |
| KIF1B    | 1.086321 | 1.02011  | 1.15683  | 0.009865 |
| FOXC1    | 1.029294 | 0.995785 | 1.06393  | 0.087299 |
| TBC1D22A | 0.986243 | 0.904315 | 1.075594 | 0.754235 |
| SYNE2    | 0.983975 | 0.935468 | 1.034997 | 0.531108 |
| PLEKHH1  | 1.094759 | 0.986789 | 1.214542 | 0.087463 |
| ATP9A    | 1.093114 | 1.042991 | 1.145646 | 0.000201 |
| FAM168A  | 1.027952 | 0.950145 | 1.112132 | 0.492402 |
| RELT     | 0.996353 | 0.94105  | 1.054907 | 0.900216 |
| GALC     | 0.970963 | 0.908982 | 1.037171 | 0.38128  |

|          |          |          |          |          |
|----------|----------|----------|----------|----------|
| NOP58    | 0.975455 | 0.899688 | 1.057601 | 0.546898 |
| KCNH2    | 1.000566 | 0.960873 | 1.0419   | 0.978125 |
| CUL1     | 0.921556 | 0.858663 | 0.989054 | 0.023504 |
| FAM114A2 | 1.163922 | 1.064579 | 1.272537 | 0.000854 |
| CYFIP2   | 1.023349 | 0.967495 | 1.082428 | 0.420238 |
| EIF2AK2  | 0.983771 | 0.919586 | 1.052435 | 0.634552 |
| USP36    | 0.921844 | 0.862745 | 0.98499  | 0.016069 |
| PUM2     | 0.971753 | 0.914842 | 1.032204 | 0.352075 |
| MRPL43   | 1.131109 | 1.012246 | 1.263931 | 0.029643 |
| ITIH4    | 1.254047 | 1.041396 | 1.51012  | 0.016949 |
| ZFR      | 0.972981 | 0.891298 | 1.062149 | 0.540372 |
| ZNF280C  | 0.983909 | 0.898358 | 1.077608 | 0.726703 |
| TRAF1    | 1.004882 | 0.950236 | 1.062671 | 0.864451 |
| RC3H2    | 0.97514  | 0.906861 | 1.04856  | 0.496701 |
| IL17RB   | 1.014432 | 0.938075 | 1.097004 | 0.719686 |
| TRAF3IP2 | 0.861719 | 0.794027 | 0.935183 | 0.000363 |
| GYG2     | 1.085838 | 1.01246  | 1.164534 | 0.021064 |
| DCBLD2   | 0.889619 | 0.816796 | 0.968934 | 0.00727  |
| SOAT1    | 0.952357 | 0.886873 | 1.022676 | 0.179256 |
| PKP2     | 1.145105 | 1.078778 | 1.215509 | 8.55E-06 |
| MSH4     | 1.269163 | 1.104149 | 1.458838 | 0.000796 |
| GDI2     | 0.901791 | 0.832415 | 0.976949 | 0.011376 |
| PRDM1    | 1.042108 | 0.979844 | 1.108328 | 0.189459 |
| ATG5     | 0.953049 | 0.864183 | 1.051055 | 0.335595 |
| TMCC3    | 0.988102 | 0.930698 | 1.049046 | 0.695071 |
| MTA3     | 1.152251 | 1.06302  | 1.248972 | 0.000569 |
| USP13    | 0.913443 | 0.850587 | 0.980944 | 0.012814 |
| ATP11B   | 0.941798 | 0.889378 | 0.997308 | 0.040147 |
| SEC61A1  | 0.984766 | 0.90506  | 1.071492 | 0.721491 |
| PPP1R12A | 0.968833 | 0.895148 | 1.048582 | 0.432722 |
| CROCC    | 1.113021 | 1.034574 | 1.197417 | 0.004086 |
| POLR3E   | 1.047382 | 0.973151 | 1.127275 | 0.217087 |
| ATP2B4   | 1.165007 | 1.101036 | 1.232696 | 1.16E-07 |
| ZC3H11A  | 0.931    | 0.819288 | 1.057945 | 0.272962 |
| RIOK2    | 1.046287 | 0.94175  | 1.162429 | 0.39951  |
| YIPF1    | 1.169228 | 1.042858 | 1.31091  | 0.007383 |
| DGKG     | 0.949107 | 0.903208 | 0.997338 | 0.03889  |
| FLYWCH1  | 1.028309 | 0.945245 | 1.118673 | 0.515948 |
| UNKL     | 0.998661 | 0.936157 | 1.065338 | 0.967593 |
| TBXAS1   | 0.965503 | 0.904067 | 1.031113 | 0.295299 |
| PARP12   | 0.948004 | 0.887164 | 1.013015 | 0.114601 |
| ALDH18A1 | 1.068572 | 1.007794 | 1.133015 | 0.026431 |
| TARBP1   | 1.034762 | 0.976632 | 1.096353 | 0.246699 |
| MXD1     | 0.963954 | 0.900034 | 1.032413 | 0.294304 |
| DNAJC25  | 0.886186 | 0.815259 | 0.963284 | 0.004528 |
| SLC2A3   | 0.903901 | 0.860804 | 0.949155 | 5.04E-05 |
| PSD      | 1.03797  | 0.977521 | 1.102157 | 0.223486 |
| CTDP1    | 0.931805 | 0.878779 | 0.98803  | 0.018137 |
| STYK1    | 1.04988  | 0.962731 | 1.144919 | 0.270929 |
| WNK1     | 1.071062 | 0.998642 | 1.148733 | 0.054615 |
| CCAR1    | 0.991295 | 0.899257 | 1.092753 | 0.860404 |
| OGFR     | 1.082962 | 0.994128 | 1.179734 | 0.067985 |
| GNA15    | 0.921968 | 0.874589 | 0.971914 | 0.002542 |
| CREB3L3  | 1.1789   | 1.063156 | 1.307245 | 0.001799 |
| PIGV     | 1.024327 | 0.950354 | 1.104057 | 0.529684 |
| PTPRU    | 1.109521 | 1.013878 | 1.214187 | 0.023845 |
| SNRNP40  | 1.173662 | 1.070805 | 1.286399 | 0.000622 |
| COL11A1  | 1.214944 | 1.122514 | 1.314986 | 1.42E-06 |

|         |          |          |          |          |
|---------|----------|----------|----------|----------|
| QSER1   | 0.967033 | 0.901792 | 1.036993 | 0.346881 |
| ACAA1   | 0.898898 | 0.830566 | 0.972853 | 0.008236 |
| BCAT1   | 0.970372 | 0.929684 | 1.01284  | 0.168767 |
| HDAC7   | 0.972142 | 0.894894 | 1.056058 | 0.503609 |
| LZTS1   | 1.014448 | 0.906142 | 1.135698 | 0.803349 |
| SPAG4   | 0.982352 | 0.911625 | 1.058566 | 0.640463 |
| NCKAP1  | 1.164033 | 1.066533 | 1.270445 | 0.000666 |
| MRPS35  | 1.00745  | 0.914475 | 1.109878 | 0.880572 |
| TNK2    | 0.936321 | 0.871297 | 1.006197 | 0.073175 |
| MON2    | 1.009932 | 0.946845 | 1.077223 | 0.763939 |
| GPBP1   | 0.929981 | 0.861358 | 1.004071 | 0.06344  |
| DGAT2   | 1.114533 | 1.039838 | 1.194593 | 0.002186 |
| CS      | 0.905356 | 0.812152 | 1.009257 | 0.072858 |
| LTK     | 0.980237 | 0.94149  | 1.020579 | 0.332036 |
| MRPS24  | 1.1523   | 1.023565 | 1.297225 | 0.019011 |
| ELMO2   | 0.950071 | 0.877259 | 1.028926 | 0.208024 |
| APPBP2  | 1.027549 | 0.946442 | 1.115606 | 0.517107 |
| POLD1   | 1.000053 | 0.934884 | 1.069764 | 0.998775 |
| SEZ6    | 0.996436 | 0.935763 | 1.061042 | 0.911299 |
| EIF4B   | 0.917833 | 0.845308 | 0.99658  | 0.041196 |
| SLC6A16 | 1.152213 | 1.063149 | 1.248737 | 0.000557 |
| SPHK2   | 1.01665  | 0.924295 | 1.118233 | 0.73398  |
| RPL18   | 0.857549 | 0.786015 | 0.935592 | 0.000544 |
| CA11    | 1.080355 | 0.98446  | 1.185592 | 0.103163 |
| ISOC2   | 1.103645 | 1.029271 | 1.183392 | 0.005597 |
| U2AF2   | 0.964831 | 0.882054 | 1.055376 | 0.43404  |
| EPN1    | 0.952426 | 0.864469 | 1.049332 | 0.324162 |
| MED29   | 0.971336 | 0.885333 | 1.065695 | 0.538665 |
| ZNF275  | 1.035111 | 0.961232 | 1.114668 | 0.361027 |
| MTMR1   | 1.047506 | 0.971028 | 1.130007 | 0.230183 |
| GPC1    | 1.110671 | 1.033608 | 1.19348  | 0.004224 |
| ADCK1   | 1.044026 | 0.962031 | 1.13301  | 0.301879 |
| HAGH    | 1.086929 | 1.005393 | 1.175077 | 0.036157 |
| RNF4    | 0.993072 | 0.909901 | 1.083845 | 0.876196 |
| CASP8   | 0.894646 | 0.834093 | 0.959594 | 0.001849 |
| TM7SF3  | 0.96197  | 0.911282 | 1.015477 | 0.160355 |
| DLX3    | 1.173896 | 1.093752 | 1.259913 | 8.84E-06 |
| SPA17   | 1.645128 | 1.348993 | 2.006271 | 8.82E-07 |
| TSPAN32 | 1.183525 | 1.128394 | 1.24135  | 4.42E-12 |
| ST3GAL6 | 0.812252 | 0.768127 | 0.858913 | 2.95E-13 |
| ATP2C2  | 1.058026 | 0.984652 | 1.136867 | 0.124008 |
| NGFR    | 1.142795 | 1.013562 | 1.288505 | 0.029259 |
| TAF2    | 1.030793 | 0.95361  | 1.114223 | 0.445004 |
| HIPK2   | 1.038175 | 0.971574 | 1.109342 | 0.268082 |
| TNPO3   | 0.993308 | 0.925739 | 1.065808 | 0.851804 |
| RFXANK  | 1.063428 | 0.941324 | 1.20137  | 0.323026 |
| TMEM161 | 1.068806 | 0.983861 | 1.161084 | 0.115284 |
| LPAR2   | 0.904457 | 0.838533 | 0.975563 | 0.009304 |
| CTSA    | 1.016722 | 0.944289 | 1.094712 | 0.660082 |
| SLC12A2 | 0.897946 | 0.844297 | 0.955003 | 0.000615 |
| SNX24   | 1.284427 | 1.179155 | 1.399099 | 9.63E-09 |
| CNN2    | 0.880904 | 0.820918 | 0.945273 | 0.000425 |
| ABCA7   | 1.158561 | 1.094672 | 1.226179 | 3.67E-07 |
| DDX20   | 0.996142 | 0.909229 | 1.091364 | 0.933869 |
| BTBD1   | 0.97     | 0.889901 | 1.057308 | 0.488506 |
| FAR2    | 1.072797 | 1.008455 | 1.141245 | 0.025964 |
| POU1F1  | 1.189189 | 1.074034 | 1.316692 | 0.000855 |
| CHI3L2  | 1.149985 | 1.063093 | 1.24398  | 0.00049  |



|          |          |          |          |          |
|----------|----------|----------|----------|----------|
| SBNO2    | 1.04038  | 0.970483 | 1.115311 | 0.264594 |
| PMS1     | 1.082039 | 1.001335 | 1.169249 | 0.046186 |
| HMG20B   | 0.890658 | 0.802853 | 0.988065 | 0.028765 |
| CALCRL   | 1.165366 | 1.096356 | 1.23872  | 8.94E-07 |
| TAF11    | 0.974168 | 0.882274 | 1.075633 | 0.60466  |
| ANKS1A   | 0.931701 | 0.874195 | 0.99299  | 0.029527 |
| AP3D1    | 1.045788 | 0.956013 | 1.143994 | 0.328246 |
| ZNF76    | 1.034033 | 0.945318 | 1.131073 | 0.464624 |
| SLC9A3R2 | 0.871467 | 0.827557 | 0.917707 | 1.83E-07 |
| NTHL1    | 0.995469 | 0.9283   | 1.067498 | 0.898611 |
| UHRF1BP1 | 0.941298 | 0.878244 | 1.008878 | 0.087245 |
| GNAI3    | 1.032231 | 0.940234 | 1.133228 | 0.505383 |
| IPO5     | 0.912485 | 0.843585 | 0.987013 | 0.022237 |
| OAT      | 1.07243  | 1.012365 | 1.136058 | 0.017413 |
| WDR3     | 1.135553 | 1.049078 | 1.229157 | 0.001658 |
| PKN2     | 0.962889 | 0.897496 | 1.033046 | 0.29192  |
| WDR18    | 1.088499 | 1.005298 | 1.178586 | 0.036598 |
| TRAM2    | 1.116835 | 1.041271 | 1.197882 | 0.001992 |
| NTN1     | 0.912456 | 0.860365 | 0.967702 | 0.002253 |
| MCM10    | 1.145012 | 1.071162 | 1.223955 | 6.87E-05 |
| DGKA     | 1.016787 | 0.944245 | 1.094901 | 0.659338 |
| ERBB3    | 1.115321 | 0.983944 | 1.26424  | 0.087852 |
| ANKRD44  | 0.994435 | 0.941598 | 1.050236 | 0.841205 |
| ADAT1    | 1.069937 | 0.98437  | 1.162942 | 0.111938 |
| PDIA5    | 1.150329 | 1.070621 | 1.235971 | 0.000132 |
| TBC1D22B | 1.050775 | 0.972896 | 1.134889 | 0.207454 |
| NDUFB4   | 0.994697 | 0.901645 | 1.097352 | 0.915496 |
| SPEN     | 0.907918 | 0.838463 | 0.983127 | 0.017357 |
| MYLK     | 1.236206 | 1.140096 | 1.340419 | 2.82E-07 |
| ZC3H15   | 0.911468 | 0.840415 | 0.988528 | 0.025182 |
| MAP2K4   | 1.001603 | 0.92868  | 1.080251 | 0.966882 |
| SLK      | 0.938055 | 0.868803 | 1.012826 | 0.102204 |
| CYB5R4   | 0.901214 | 0.833523 | 0.974402 | 0.009031 |
| COL17A1  | 0.941705 | 0.884121 | 1.003041 | 0.062089 |
| GSTO2    | 1.01955  | 0.955307 | 1.088114 | 0.55985  |
| SEC61A2  | 0.946932 | 0.875156 | 1.024595 | 0.175159 |
| PRKCQ    | 1.014798 | 0.959409 | 1.073385 | 0.607976 |
| TLE2     | 1.051798 | 0.939797 | 1.177146 | 0.379347 |
| ASB1     | 1.092504 | 1.00678  | 1.185526 | 0.033834 |
| FAM107B  | 0.973862 | 0.921335 | 1.029383 | 0.34914  |
| ME1      | 0.925247 | 0.867225 | 0.98715  | 0.018703 |
| TBC1D1   | 0.945829 | 0.87018  | 1.028054 | 0.190381 |
| MTHFD2   | 1.099622 | 1.012071 | 1.194747 | 0.02487  |
| SLC9A7   | 0.973606 | 0.917038 | 1.033664 | 0.381125 |
| FOXJ2    | 0.941733 | 0.854402 | 1.037989 | 0.226642 |
| YBX1     | 0.909489 | 0.830735 | 0.99571  | 0.040073 |
| PDE4A    | 0.964519 | 0.910887 | 1.021309 | 0.215864 |
| PPP2R5A  | 1.005086 | 0.919205 | 1.098992 | 0.911357 |
| ELAVL1   | 1.019944 | 0.929159 | 1.119599 | 0.678012 |
| TIE1     | 0.97062  | 0.923805 | 1.019808 | 0.237087 |
| DIP2B    | 0.975783 | 0.910936 | 1.045247 | 0.484736 |
| SMARCD1  | 0.950974 | 0.8716   | 1.037576 | 0.258289 |
| NFYC     | 1.029546 | 0.921029 | 1.15085  | 0.608383 |
| ZMYND12  | 1.168893 | 1.026909 | 1.330507 | 0.018185 |
| SLC9A3   | 0.91077  | 0.812892 | 1.020433 | 0.107122 |
| NGEF     | 0.950748 | 0.83633  | 1.08082  | 0.440119 |
| ASPM     | 1.104702 | 1.042804 | 1.170274 | 0.000713 |
| CD84     | 1.050038 | 0.995216 | 1.107881 | 0.074313 |

|          |          |          |          |          |
|----------|----------|----------|----------|----------|
| ELOVL1   | 1.009922 | 0.909097 | 1.121929 | 0.854025 |
| SPI1     | 0.88121  | 0.822866 | 0.943691 | 0.000297 |
| MPPED2   | 1.249068 | 1.160736 | 1.344122 | 2.80E-09 |
| CLDN18   | 1.197912 | 1.065059 | 1.347337 | 0.002605 |
| ZBTB11   | 0.923509 | 0.864043 | 0.987067 | 0.019114 |
| ATXN3    | 0.967138 | 0.893537 | 1.046802 | 0.40802  |
| GOLGA5   | 0.998352 | 0.911264 | 1.093764 | 0.971754 |
| LRRC40   | 0.997553 | 0.923078 | 1.078038 | 0.950662 |
| ISOC1    | 1.063568 | 0.98732  | 1.145704 | 0.10443  |
| TRMT11   | 1.083906 | 0.998838 | 1.176219 | 0.053349 |
| THUMPD1  | 0.918701 | 0.864257 | 0.976574 | 0.006519 |
| KIF26A   | 0.931719 | 0.879368 | 0.987187 | 0.016528 |
| ATG2B    | 1.023987 | 0.958369 | 1.094097 | 0.482981 |
| ARFGEF1  | 0.943472 | 0.892448 | 0.997412 | 0.040236 |
| ZFAT     | 0.995447 | 0.92411  | 1.07229  | 0.904253 |
| MTFR1    | 0.995473 | 0.919881 | 1.077276 | 0.910337 |
| STAG3    | 0.977075 | 0.906303 | 1.053374 | 0.545494 |
| FECH     | 1.045188 | 0.993053 | 1.100059 | 0.090469 |
| MYO9A    | 0.971005 | 0.905337 | 1.041437 | 0.4102   |
| DDX3Y    | 1.008798 | 0.987316 | 1.030747 | 0.425099 |
| PFKP     | 1.0313   | 0.967726 | 1.099051 | 0.342424 |
| IDI1     | 0.958498 | 0.88088  | 1.042955 | 0.325208 |
| SP100    | 1.057937 | 0.962989 | 1.162247 | 0.240433 |
| KLF6     | 0.906009 | 0.849582 | 0.966184 | 0.002626 |
| NEO1     | 1.108509 | 1.068996 | 1.149482 | 2.65E-08 |
| TRAM1    | 0.979843 | 0.902194 | 1.064175 | 0.628809 |
| PHKA1    | 1.216656 | 1.126744 | 1.313743 | 5.55E-07 |
| TNFRSF1A | 0.937784 | 0.868318 | 1.012806 | 0.101861 |
| CACNB1   | 1.083008 | 1.010775 | 1.160403 | 0.023557 |
| EVI5     | 1.001429 | 0.939559 | 1.067372 | 0.964996 |
| STOML1   | 1.342789 | 1.161986 | 1.551724 | 6.48E-05 |
| DHX29    | 1.036649 | 0.95065  | 1.130429 | 0.415302 |
| DNTTIP2  | 0.991871 | 0.906187 | 1.085657 | 0.85945  |
| TP53BP1  | 0.932414 | 0.876614 | 0.991765 | 0.026243 |
| TRO      | 1.124349 | 1.065153 | 1.186835 | 2.16E-05 |
| RRP15    | 1.114951 | 1.01384  | 1.226146 | 0.024875 |
| RHOA     | 0.896475 | 0.807603 | 0.995126 | 0.0402   |
| DHX8     | 1.051749 | 0.961403 | 1.150585 | 0.270887 |
| PRKCZ    | 1.276559 | 1.181603 | 1.379145 | 5.97E-10 |
| ZFY      | 1.014868 | 0.98349  | 1.047248 | 0.35703  |
| IARS2    | 1.116616 | 1.031122 | 1.209198 | 0.006646 |
| NAV3     | 0.943525 | 0.881293 | 1.010151 | 0.094947 |
| IDH3G    | 1.079265 | 0.955766 | 1.218721 | 0.218593 |
| ROGDI    | 1.13076  | 1.037927 | 1.231896 | 0.004929 |
| PDZD4    | 1.084833 | 0.979919 | 1.20098  | 0.116633 |
| ROCK1    | 0.967544 | 0.899087 | 1.041212 | 0.378167 |
| CBFB     | 1.14349  | 1.050209 | 1.245056 | 0.002013 |
| PDK3     | 0.996908 | 0.924522 | 1.074962 | 0.935825 |
| HYAL2    | 0.858627 | 0.793247 | 0.929397 | 0.000162 |
| HDAC4    | 0.985589 | 0.929524 | 1.045036 | 0.627135 |
| RASSF1   | 0.862174 | 0.796504 | 0.933259 | 0.000244 |
| FGFR3    | 0.955009 | 0.886064 | 1.029318 | 0.228541 |
| IFI35    | 1.063313 | 0.975271 | 1.159303 | 0.163884 |
| HEATR6   | 1.278328 | 1.169557 | 1.397215 | 6.23E-08 |
| COASY    | 1.040794 | 0.934581 | 1.159077 | 0.466591 |
| PLEKHH3  | 0.932053 | 0.876136 | 0.991539 | 0.025804 |
| MEF2A    | 0.884616 | 0.825545 | 0.947915 | 0.000507 |
| OTUD5    | 0.934039 | 0.846788 | 1.03028  | 0.172636 |

|         |          |          |          |          |
|---------|----------|----------|----------|----------|
| TFE3    | 0.863768 | 0.791957 | 0.942091 | 0.000943 |
| TBC1D25 | 0.903125 | 0.818986 | 0.995908 | 0.041138 |
| ACSL4   | 0.985244 | 0.915609 | 1.060175 | 0.690996 |
| INPP5A  | 1.057023 | 0.985379 | 1.133875 | 0.121465 |
| GPKOW   | 1.023612 | 0.91521  | 1.144853 | 0.682816 |
| GRIPAP1 | 0.951715 | 0.870776 | 1.040176 | 0.275121 |
| FTSJ1   | 1.066592 | 0.946823 | 1.201512 | 0.288773 |
| PRR11   | 1.077382 | 0.991256 | 1.170992 | 0.07954  |
| ATP11A  | 0.918137 | 0.863371 | 0.976377 | 0.006492 |
| POLR1A  | 1.019656 | 0.953338 | 1.090587 | 0.570511 |
| LAPTM4A | 0.942651 | 0.869839 | 1.021558 | 0.149883 |
| TTC7A   | 0.893376 | 0.837201 | 0.95332  | 0.000667 |
| IP6K2   | 0.970357 | 0.895851 | 1.05106  | 0.460372 |
| SRBD1   | 0.88979  | 0.831188 | 0.952524 | 0.000782 |
| KIF2A   | 0.96441  | 0.895598 | 1.038508 | 0.337299 |
| RASGRP2 | 1.104132 | 1.023157 | 1.191516 | 0.010802 |
| PSME4   | 0.940297 | 0.890066 | 0.993362 | 0.027968 |
| IFT80   | 1.134979 | 1.045431 | 1.232199 | 0.002532 |
| SIRT2   | 1.078944 | 0.966101 | 1.204967 | 0.177629 |
| PPP2R5B | 1.041293 | 0.976459 | 1.110431 | 0.217333 |
| PYGM    | 0.998254 | 0.946029 | 1.053362 | 0.949172 |
| PITX1   | 1.150324 | 1.089953 | 1.214039 | 3.55E-07 |
| MAST4   | 1.036742 | 0.973086 | 1.104562 | 0.264392 |
| SDK2    | 1.019091 | 0.964975 | 1.076243 | 0.496954 |
| NUP133  | 1.014903 | 0.943476 | 1.091737 | 0.691144 |
| NUCKS1  | 1.113583 | 1.030076 | 1.203861 | 0.00683  |
| VPS35   | 1.003413 | 0.928307 | 1.084596 | 0.931597 |
| DNAJA2  | 0.956723 | 0.876445 | 1.044354 | 0.322462 |
| BCL3    | 0.982342 | 0.921267 | 1.047467 | 0.586464 |
| KCNAB2  | 1.008664 | 0.939675 | 1.082719 | 0.811368 |
| GAL     | 1.103704 | 1.015812 | 1.199202 | 0.01978  |
| CLEC2D  | 1.055797 | 0.997265 | 1.117764 | 0.062065 |
| FUNDC1  | 1.060068 | 0.953742 | 1.178247 | 0.279386 |
| RORA    | 1.026134 | 0.964534 | 1.091668 | 0.414079 |
| DRD4    | 0.979347 | 0.907576 | 1.056794 | 0.590975 |
| TGFBR3  | 1.065869 | 0.987796 | 1.150112 | 0.100261 |
| PLA2G10 | 0.958809 | 0.878525 | 1.046429 | 0.345797 |
| ATP1B3  | 0.977531 | 0.896761 | 1.065575 | 0.605517 |
| NEDD4   | 0.966013 | 0.91098  | 1.024371 | 0.24793  |
| PIGB    | 1.033478 | 0.952473 | 1.121372 | 0.429104 |
| MAPK6   | 0.998099 | 0.923266 | 1.078998 | 0.961838 |
| GNB5    | 1.175896 | 1.089517 | 1.269124 | 3.15E-05 |
| RAB27A  | 0.892275 | 0.838258 | 0.949772 | 0.000347 |
| LRP6    | 0.903803 | 0.855779 | 0.954522 | 0.000283 |
| SCT     | 0.971452 | 0.914646 | 1.031786 | 0.346127 |
| PHRF1   | 0.983043 | 0.91801  | 1.052684 | 0.624322 |
| NUCB2   | 0.979494 | 0.91323  | 1.050565 | 0.56209  |
| PFN2    | 1.207793 | 1.084165 | 1.345518 | 0.000611 |
| SPTB    | 1.011831 | 0.975098 | 1.049946 | 0.533035 |
| DAPP1   | 1.033837 | 0.967659 | 1.104542 | 0.324163 |
| SLC44A1 | 1.209144 | 1.151556 | 1.269612 | 2.39E-14 |
| SMG6    | 0.980514 | 0.914068 | 1.051789 | 0.582565 |
| EXOC5   | 0.996554 | 0.914656 | 1.085787 | 0.937125 |
| CLTCL1  | 1.08983  | 1.044319 | 1.137324 | 7.73E-05 |
| FGF22   | 0.926059 | 0.765465 | 1.120346 | 0.429221 |
| FSTL3   | 0.907727 | 0.855529 | 0.96311  | 0.001356 |
| DGCR2   | 1.033285 | 0.965801 | 1.105485 | 0.342024 |
| RNF126  | 0.859442 | 0.769947 | 0.959339 | 0.006937 |

|                      |          |          |          |          |
|----------------------|----------|----------|----------|----------|
| MNT                  | 0.965756 | 0.881463 | 1.05811  | 0.4546   |
| ZXDC                 | 0.970515 | 0.901947 | 1.044296 | 0.423383 |
| JMJD6                | 1.026326 | 0.938871 | 1.121928 | 0.567421 |
| POLB                 | 0.880489 | 0.812421 | 0.95426  | 0.001932 |
| ST6GALN <sup>A</sup> | 1.08797  | 1.027043 | 1.15251  | 0.004137 |
| WIPI1                | 0.979073 | 0.919839 | 1.042121 | 0.506554 |
| GBA2                 | 1.062088 | 0.980913 | 1.14998  | 0.13757  |
| NDST1                | 0.916079 | 0.859768 | 0.976078 | 0.006769 |
| ASNS                 | 0.990593 | 0.861142 | 1.139502 | 0.894759 |
| AP3M2                | 1.036681 | 0.958722 | 1.120979 | 0.366446 |
| ST6GALN <sup>A</sup> | 0.974702 | 0.882857 | 1.076102 | 0.611845 |
| PABPC1               | 0.886443 | 0.808645 | 0.971726 | 0.010113 |
| TESK2                | 1.009449 | 0.914533 | 1.114216 | 0.851922 |
| CSNK2A2              | 0.918631 | 0.84404  | 0.999813 | 0.049496 |
| EIF2B3               | 1.186743 | 1.099926 | 1.280413 | 1.00E-05 |
| CAMK2A               | 0.999226 | 0.947948 | 1.053277 | 0.977012 |
| TCOF1                | 1.018073 | 0.96193  | 1.077493 | 0.535989 |
| CDC42                | 0.889771 | 0.815729 | 0.970534 | 0.008422 |
| OSBPL3               | 1.026426 | 0.967928 | 1.088459 | 0.383661 |
| SLC12A3              | 1.221544 | 1.102381 | 1.353589 | 0.000133 |
| RAD18                | 1.018864 | 0.938385 | 1.106246 | 0.656211 |
| ATP2B1               | 0.915179 | 0.860532 | 0.973295 | 0.004778 |
| TRPM5                | 0.961174 | 0.88211  | 1.047325 | 0.365899 |
| NCK2                 | 0.952141 | 0.884822 | 1.024583 | 0.189911 |
| MAP4K4               | 0.983918 | 0.905959 | 1.068586 | 0.700284 |
| MGAT4A               | 0.992698 | 0.923006 | 1.067653 | 0.843575 |
| RPL31                | 0.895567 | 0.831969 | 0.964027 | 0.003338 |
| WDR1                 | 0.993576 | 0.910154 | 1.084643 | 0.885467 |
| SNX13                | 0.960843 | 0.896505 | 1.029798 | 0.258647 |
| ARHGAP10             | 1.070892 | 1.013806 | 1.131193 | 0.014265 |
| RPS6KA2              | 0.825434 | 0.777934 | 0.875834 | 2.23E-10 |
| ING3                 | 0.980204 | 0.904181 | 1.062619 | 0.627384 |
| VASH1                | 1.075689 | 1.005316 | 1.150987 | 0.034553 |
| SEL1L                | 1.02281  | 0.953755 | 1.096864 | 0.527143 |
| TRIP13               | 1.159178 | 1.077248 | 1.247339 | 7.83E-05 |
| ATP6AP1              | 1.171643 | 1.058012 | 1.297479 | 0.002339 |
| TCF3                 | 0.967665 | 0.892826 | 1.048777 | 0.423513 |
| TRIB2                | 0.979591 | 0.92922  | 1.032692 | 0.443926 |
| DAZAP1               | 0.96741  | 0.877782 | 1.06619  | 0.504181 |
| MBD3                 | 1.057518 | 0.971924 | 1.150651 | 0.194058 |
| HLTF                 | 1.101864 | 1.031463 | 1.17707  | 0.003982 |
| FAM50A               | 1.253727 | 1.125517 | 1.396541 | 3.99E-05 |
| FAM3A                | 1.06313  | 0.945862 | 1.194936 | 0.304611 |
| CPSF1                | 1.03781  | 0.964825 | 1.116316 | 0.318515 |
| CYBRD1               | 0.961752 | 0.90685  | 1.019978 | 0.193466 |
| PDCD2                | 1.098914 | 0.982142 | 1.22957  | 0.099849 |
| RDH11                | 1.01093  | 0.919667 | 1.11125  | 0.821828 |
| PRKACA               | 0.93902  | 0.849082 | 1.038485 | 0.220637 |
| ACTN1                | 1.078861 | 1.014997 | 1.146744 | 0.014766 |
| ZFYVE26              | 1.004093 | 0.937716 | 1.075168 | 0.906824 |
| EPN2                 | 0.920994 | 0.85253  | 0.994957 | 0.036775 |
| PTPN18               | 0.999437 | 0.934412 | 1.068987 | 0.986903 |
| LIMS2                | 1.204035 | 1.061217 | 1.366074 | 0.003948 |
| LNX1                 | 1.15657  | 1.029797 | 1.298949 | 0.014063 |
| ALDH3A2              | 1.10864  | 1.036713 | 1.185556 | 0.002583 |
| TFRC                 | 1.038124 | 0.982595 | 1.096792 | 0.182214 |
| SREBF1               | 0.99528  | 0.927284 | 1.068261 | 0.895734 |
| TRPC5                | 0.933089 | 0.830277 | 1.048633 | 0.24495  |

|          |          |          |          |          |
|----------|----------|----------|----------|----------|
| AFF4     | 0.903125 | 0.848575 | 0.961182 | 0.001348 |
| UBE2D1   | 1.00455  | 0.935897 | 1.07824  | 0.899971 |
| MPP5     | 0.959512 | 0.883404 | 1.042177 | 0.326984 |
| RHOBTB1  | 0.996094 | 0.93976  | 1.055805 | 0.895176 |
| SMC1A    | 1.094093 | 1.009378 | 1.185918 | 0.028744 |
| HSD17B10 | 1.244989 | 1.133859 | 1.367011 | 4.36E-06 |
| MARK2    | 0.959817 | 0.883127 | 1.043166 | 0.334393 |
| HMMR     | 1.058596 | 0.987208 | 1.135147 | 0.10992  |
| CHFR     | 0.993956 | 0.914389 | 1.080447 | 0.886756 |
| P4HA2    | 1.047459 | 0.948216 | 1.157088 | 0.361256 |
| FCGR2B   | 1.032425 | 0.967496 | 1.101712 | 0.335612 |
| NFATC3   | 1.00152  | 0.933046 | 1.07502  | 0.966462 |
| TRNT1    | 0.945959 | 0.878118 | 1.01904  | 0.14341  |
| ACADVL   | 1.032196 | 0.947938 | 1.123943 | 0.465779 |
| STK10    | 1.153231 | 1.065876 | 1.247747 | 0.000389 |
| FBXW11   | 0.956933 | 0.890481 | 1.028344 | 0.230597 |
| ACAP1    | 1.00299  | 0.928522 | 1.08343  | 0.939542 |
| CRMP1    | 0.88178  | 0.780137 | 0.996666 | 0.044072 |
| EVC      | 0.923095 | 0.856833 | 0.99448  | 0.035239 |
| DERL2    | 1.110903 | 1.00198  | 1.231667 | 0.045767 |
| SIDT1    | 0.954604 | 0.881758 | 1.033468 | 0.251331 |
| NDE1     | 0.973807 | 0.895102 | 1.059432 | 0.537047 |
| TMEM38A  | 1.017573 | 0.952319 | 1.087299 | 0.606435 |
| AP1M1    | 1.11259  | 1.010646 | 1.224817 | 0.02956  |
| PVR      | 1.168808 | 1.098913 | 1.243149 | 7.12E-07 |
| XRCC1    | 0.89848  | 0.801216 | 1.007551 | 0.06706  |
| SCARB1   | 0.955879 | 0.896434 | 1.019266 | 0.16837  |
| CYP2W1   | 1.174965 | 1.055476 | 1.307982 | 0.003212 |
| MCM2     | 1.046301 | 0.983276 | 1.113365 | 0.153327 |
| PANX2    | 0.981093 | 0.933676 | 1.030919 | 0.450135 |
| TP63     | 1.107868 | 1.023707 | 1.198949 | 0.011047 |
| ALPK1    | 1.018259 | 0.953444 | 1.08748  | 0.589733 |
| LLGL2    | 1.081603 | 0.998004 | 1.172205 | 0.055969 |
| PDE8A    | 0.889045 | 0.822919 | 0.960485 | 0.002861 |
| CLCN4    | 1.098778 | 1.030559 | 1.171512 | 0.003972 |
| NLE1     | 1.016948 | 0.928192 | 1.11419  | 0.718336 |
| SDHA     | 1.068088 | 0.991345 | 1.150773 | 0.08337  |
| SMARCE1  | 1.104243 | 1.017592 | 1.198272 | 0.017397 |
| GSDMB    | 1.019408 | 0.950387 | 1.093441 | 0.59101  |
| KDM5A    | 0.990863 | 0.929018 | 1.056825 | 0.780133 |
| ADAM11   | 1.161972 | 1.065003 | 1.267771 | 0.000734 |
| PPP2R3A  | 1.085012 | 0.998769 | 1.178702 | 0.053507 |
| FERMT2   | 0.869821 | 0.760367 | 0.995031 | 0.042097 |
| DHRS9    | 1.064434 | 1.013599 | 1.117819 | 0.012386 |
| CD5L     | 1.029594 | 0.957872 | 1.106687 | 0.428559 |
| PTGS2    | 1.044465 | 0.999779 | 1.091148 | 0.051167 |
| IGF2BP2  | 0.962314 | 0.914401 | 1.012738 | 0.140422 |
| MAP3K13  | 1.180232 | 1.071625 | 1.299845 | 0.000767 |
| ST6GAL1  | 1.002982 | 0.942478 | 1.067371 | 0.925267 |
| TBX21    | 1.041113 | 0.968739 | 1.118894 | 0.27308  |
| FRY      | 0.92215  | 0.875934 | 0.970804 | 0.002005 |
| PICALM   | 0.967035 | 0.897748 | 1.041668 | 0.376848 |
| NSF      | 1.124573 | 1.044498 | 1.210787 | 0.001839 |
| CLASP1   | 0.990921 | 0.930362 | 1.055422 | 0.776812 |
| MRPS34   | 1.098514 | 1.012938 | 1.19132  | 0.02317  |
| NOTCH3   | 0.916458 | 0.857447 | 0.97953  | 0.010199 |
| CLNS1A   | 1.027788 | 0.935419 | 1.129276 | 0.568365 |
| TEAD2    | 1.209324 | 1.129308 | 1.295009 | 5.28E-08 |

|          |          |          |          |          |
|----------|----------|----------|----------|----------|
| EED      | 0.973213 | 0.898367 | 1.054294 | 0.506032 |
| TSG101   | 1.060841 | 0.947027 | 1.188332 | 0.307729 |
| ATP2A3   | 0.958985 | 0.899066 | 1.022898 | 0.203294 |
| MGLL     | 1.126417 | 1.066437 | 1.189769 | 2.01E-05 |
| BCS1L    | 1.254379 | 1.156257 | 1.360828 | 4.94E-08 |
| NUAK1    | 1.218739 | 1.114196 | 1.33309  | 1.54E-05 |
| DPP8     | 1.035668 | 0.953451 | 1.124974 | 0.406283 |
| SLC24A1  | 0.998846 | 0.93206  | 1.070418 | 0.973917 |
| ZNF532   | 1.165935 | 1.115904 | 1.218209 | 6.85E-12 |
| SCARF1   | 1.053905 | 0.998162 | 1.112761 | 0.058276 |
| LMAN1    | 0.938887 | 0.871957 | 1.010953 | 0.094672 |
| ZZEF1    | 0.960449 | 0.89924  | 1.025825 | 0.22972  |
| ENO1     | 0.98528  | 0.908991 | 1.067972 | 0.718363 |
| ANO8     | 1.120825 | 1.055886 | 1.189759 | 0.00018  |
| TUBE1    | 1.299013 | 1.167036 | 1.445916 | 1.70E-06 |
| ARHGEF1C | 1.094551 | 1.044538 | 1.14696  | 0.000153 |
| TXK      | 1.071997 | 1.015688 | 1.131428 | 0.011557 |
| TACR2    | 1.043981 | 0.954471 | 1.141885 | 0.346653 |
| ACTR6    | 1.099017 | 0.992078 | 1.217484 | 0.070656 |
| TIPIN    | 1.124842 | 1.009727 | 1.253081 | 0.032705 |
| SRI      | 1.194679 | 1.080381 | 1.321069 | 0.000527 |
| EIF4G3   | 1.001434 | 0.921083 | 1.088794 | 0.973208 |
| NUP37    | 1.182139 | 1.067547 | 1.309031 | 0.001298 |
| SEMA3A   | 1.241633 | 1.126824 | 1.36814  | 1.23E-05 |
| GTSE1    | 1.212095 | 1.128724 | 1.301624 | 1.22E-07 |
| SEMA3C   | 1.141399 | 1.056998 | 1.232539 | 0.00074  |
| TTC38    | 1.182713 | 1.101196 | 1.270264 | 4.11E-06 |
| ACAT1    | 1.124941 | 1.031092 | 1.227332 | 0.008076 |
| GRAMD4   | 1.010229 | 0.95386  | 1.069931 | 0.728277 |
| CELSR1   | 1.047419 | 0.978941 | 1.120688 | 0.179276 |
| WNT8B    | 1.106561 | 1.014029 | 1.207536 | 0.023048 |
| ZNF638   | 1.008897 | 0.948108 | 1.073583 | 0.779966 |
| SLC25A40 | 0.955718 | 0.890727 | 1.02545  | 0.207474 |
| ADD2     | 1.047896 | 1.000684 | 1.097335 | 0.046698 |
| RASAL2   | 1.097029 | 1.022546 | 1.176937 | 0.009838 |
| ZNF37A   | 1.169918 | 1.069251 | 1.280062 | 0.00063  |
| MARK3    | 1.004445 | 0.933724 | 1.080523 | 0.905227 |
| SLC25A3  | 0.897058 | 0.811436 | 0.991714 | 0.033793 |
| FNDC3B   | 0.880503 | 0.835255 | 0.928202 | 2.27E-06 |
| FOSL2    | 0.943563 | 0.889761 | 1.000618 | 0.052459 |
| CACNG4   | 1.096829 | 1.022351 | 1.176734 | 0.009993 |
| FRYL     | 0.997906 | 0.940403 | 1.058924 | 0.944809 |
| TMEM131  | 0.990153 | 0.913738 | 1.072958 | 0.809168 |
| FSCN1    | 0.911578 | 0.875128 | 0.949546 | 8.73E-06 |
| ACTB     | 1.051657 | 0.972451 | 1.137314 | 0.20741  |
| PLD1     | 0.849012 | 0.800121 | 0.90089  | 6.34E-08 |
| WDR62    | 1.102455 | 1.020813 | 1.190627 | 0.012966 |
| DLG1     | 1.05747  | 0.969364 | 1.153583 | 0.208049 |
| RAB7A    | 1.037031 | 0.914534 | 1.175936 | 0.570748 |
| BCAP29   | 0.999507 | 0.873171 | 1.144122 | 0.994294 |
| SEC31B   | 1.069194 | 0.999245 | 1.144039 | 0.052614 |
| SART3    | 1.007655 | 0.933412 | 1.087803 | 0.845163 |
| ARHGAP11 | 0.993414 | 0.923693 | 1.068398 | 0.858738 |
| TUBA3D   | 0.991966 | 0.911547 | 1.07948  | 0.851663 |
| EXOSC7   | 1.039817 | 0.946271 | 1.142612 | 0.416924 |
| KIFAP3   | 1.004169 | 0.939878 | 1.072859 | 0.901911 |
| MKRN2    | 0.954965 | 0.875667 | 1.041444 | 0.29748  |
| MCM6     | 1.10656  | 1.031304 | 1.187307 | 0.004837 |

|          |          |          |          |          |
|----------|----------|----------|----------|----------|
| REXO2    | 1.121116 | 1.04363  | 1.204354 | 0.001756 |
| RBM7     | 0.936095 | 0.857871 | 1.021452 | 0.138011 |
| RBMS2    | 0.928126 | 0.870474 | 0.989597 | 0.022633 |
| BAZ2A    | 0.924843 | 0.865905 | 0.987792 | 0.020042 |
| PTPN23   | 0.97866  | 0.890036 | 1.076108 | 0.656025 |
| MLH1     | 1.064417 | 0.967722 | 1.170772 | 0.198885 |
| UNG      | 1.067183 | 1.006317 | 1.13173  | 0.029997 |
| FMO4     | 1.157537 | 1.05958  | 1.26455  | 0.001184 |
| KLHL20   | 1.061984 | 0.974965 | 1.15677  | 0.167981 |
| SLC46A1  | 1.510162 | 1.339518 | 1.702546 | 1.61E-11 |
| PLXNA2   | 1.157068 | 1.066002 | 1.255914 | 0.000486 |
| SPAG5    | 1.058344 | 0.987948 | 1.133757 | 0.106375 |
| ANKRD13  | 1.090366 | 0.98468  | 1.207396 | 0.096279 |
| TPD52    | 1.142047 | 1.062432 | 1.227627 | 0.000315 |
| ACACB    | 1.029972 | 0.966261 | 1.097884 | 0.364688 |
| TRAF4    | 0.975472 | 0.918852 | 1.035581 | 0.415647 |
| PAG1     | 0.937409 | 0.886323 | 0.99144  | 0.023781 |
| GPATCH1  | 1.130636 | 1.033429 | 1.236986 | 0.007431 |
| ICAM3    | 0.977758 | 0.903895 | 1.057656 | 0.574616 |
| NT5C2    | 0.920747 | 0.855026 | 0.991519 | 0.028861 |
| MCAM     | 0.842871 | 0.793389 | 0.895438 | 3.06E-08 |
| GPC4     | 1.023669 | 0.970318 | 1.079953 | 0.391665 |
| MBNL3    | 0.995522 | 0.934265 | 1.060796 | 0.889844 |
| RAP1GAP  | 1.018582 | 0.97171  | 1.067715 | 0.443673 |
| XAB2     | 0.93276  | 0.856731 | 1.015536 | 0.108585 |
| ARHGEF1  | 1.069462 | 0.98319  | 1.163306 | 0.117605 |
| STXBP2   | 0.943322 | 0.861485 | 1.032934 | 0.207618 |
| MAP2K7   | 0.968369 | 0.889113 | 1.054691 | 0.460665 |
| DGKD     | 0.969342 | 0.906063 | 1.037041 | 0.365995 |
| RARB     | 1.052511 | 0.976263 | 1.134714 | 0.182252 |
| TOP2B    | 1.014721 | 0.947542 | 1.086663 | 0.675839 |
| TM9SF3   | 0.951415 | 0.888137 | 1.019201 | 0.156093 |
| NFKB2    | 0.999915 | 0.946024 | 1.056876 | 0.9976   |
| UBE2T    | 1.186291 | 1.104465 | 1.274179 | 2.80E-06 |
| PPP1R12B | 1.070927 | 0.999123 | 1.147892 | 0.052966 |
| DNAJC10  | 1.172    | 1.075542 | 1.277108 | 0.000292 |
| GTF3C1   | 0.98738  | 0.92066  | 1.058935 | 0.721997 |
| IL4R     | 0.964171 | 0.908959 | 1.022737 | 0.225235 |
| USP33    | 1.0145   | 0.946816 | 1.087021 | 0.682806 |
| SNRPA    | 1.02223  | 0.922097 | 1.133236 | 0.675944 |
| SPAG6    | 1.149374 | 1.109283 | 1.190913 | 1.52E-14 |
| EXOSC5   | 1.084596 | 1.012596 | 1.161716 | 0.020497 |
| DYNC112  | 1.001763 | 0.918901 | 1.092097 | 0.968105 |
| APBB1IP  | 0.888615 | 0.83092  | 0.950315 | 0.000565 |
| LRCH4    | 0.917727 | 0.846952 | 0.994415 | 0.036017 |
| FAM76B   | 0.991739 | 0.914804 | 1.075145 | 0.840439 |
| SIRT6    | 1.185029 | 1.048007 | 1.339966 | 0.006771 |
| POLD3    | 1.134303 | 1.046373 | 1.229621 | 0.002206 |
| CAPZB    | 1.01515  | 0.911358 | 1.130762 | 0.784669 |
| GPR137B  | 1.051995 | 0.977049 | 1.13269  | 0.178877 |
| NAALAD2  | 1.04676  | 0.940313 | 1.165256 | 0.4036   |
| SLC25A43 | 0.984047 | 0.9154   | 1.057841 | 0.662919 |
| UBE2A    | 0.885964 | 0.804425 | 0.975768 | 0.013974 |
| FGFR1    | 0.855114 | 0.81237  | 0.900107 | 2.20E-09 |
| SMC1B    | 1.037011 | 0.949147 | 1.133009 | 0.421075 |
| FBLN1    | 0.898569 | 0.812724 | 0.993481 | 0.036831 |
| CST7     | 0.926373 | 0.891521 | 0.962588 | 9.28E-05 |
| PIAS2    | 0.966836 | 0.894262 | 1.0453   | 0.396919 |

|          |          |          |          |          |
|----------|----------|----------|----------|----------|
| AMPH     | 1.029168 | 0.932531 | 1.13582  | 0.567666 |
| ARAF     | 0.949527 | 0.850836 | 1.059665 | 0.354987 |
| MCCC1    | 1.018786 | 0.938353 | 1.106113 | 0.657365 |
| LAMP3    | 1.304127 | 1.154274 | 1.473434 | 2.01E-05 |
| ACER3    | 1.028065 | 0.935405 | 1.129904 | 0.565732 |
| UBE2K    | 1.021193 | 0.929793 | 1.121579 | 0.661118 |
| PIK3C3   | 1.045515 | 0.970245 | 1.126624 | 0.242979 |
| N4BP2    | 1.015598 | 0.946349 | 1.089915 | 0.66752  |
| TULP3    | 1.24172  | 1.11049  | 1.388457 | 0.000145 |
| SYNJ2    | 1.11067  | 1.038622 | 1.187716 | 0.00216  |
| PPP2R5C  | 0.99186  | 0.917542 | 1.072198 | 0.837047 |
| GNB1     | 0.969391 | 0.883792 | 1.063281 | 0.509842 |
| HOXA9    | 1.129473 | 1.099922 | 1.159818 | 2.24E-19 |
| EDN1     | 1.190847 | 1.10622  | 1.281948 | 3.42E-06 |
| MLLT10   | 0.948558 | 0.879376 | 1.023182 | 0.171677 |
| ZCWPW1   | 0.937407 | 0.853717 | 1.029302 | 0.17552  |
| P2RY10   | 0.937222 | 0.88438  | 0.993222 | 0.02855  |
| ITM2A    | 0.907811 | 0.877108 | 0.939589 | 3.60E-08 |
| VDAC3    | 1.054805 | 0.962907 | 1.155474 | 0.251285 |
| PCM1     | 0.977463 | 0.918271 | 1.04047  | 0.474484 |
| TNRC6C   | 1.046768 | 0.974934 | 1.123896 | 0.207631 |
| CBFA2T2  | 1.041224 | 0.964934 | 1.123545 | 0.298097 |
| ITCH     | 0.948312 | 0.887027 | 1.013832 | 0.119484 |
| PKD2L2   | 0.986557 | 0.924915 | 1.052306 | 0.680957 |
| TP53INP2 | 0.935328 | 0.885406 | 0.988064 | 0.016892 |
| SDF4     | 0.995348 | 0.908505 | 1.090492 | 0.920253 |
| MYH7B    | 1.031201 | 0.958018 | 1.109974 | 0.413339 |
| TP73     | 1.270378 | 1.172353 | 1.376599 | 5.19E-09 |
| TOLLIP   | 1.052366 | 0.962908 | 1.150135 | 0.260131 |
| UBE2D4   | 1.125972 | 1.023064 | 1.239232 | 0.015256 |
| RUNX1T1  | 0.93366  | 0.89236  | 0.976871 | 0.002942 |
| THOC1    | 0.984258 | 0.92206  | 1.050653 | 0.633788 |
| FKBP7    | 1.109809 | 1.000001 | 1.231675 | 0.049998 |
| OSBPL6   | 1.055146 | 0.963282 | 1.155772 | 0.248081 |
| SLC1A3   | 0.97966  | 0.917558 | 1.045965 | 0.538552 |
| XRCC5    | 1.021796 | 0.938871 | 1.112046 | 0.61756  |
| LXN      | 1.029899 | 0.959823 | 1.105092 | 0.412544 |
| SP140    | 0.991878 | 0.935452 | 1.051708 | 0.784935 |
| MKNK1    | 1.104683 | 0.998516 | 1.222138 | 0.053464 |
| TNS1     | 1.016452 | 0.971387 | 1.063608 | 0.480639 |
| REXO1    | 0.87677  | 0.812013 | 0.94669  | 0.000781 |
| SAR1A    | 0.976258 | 0.906098 | 1.051851 | 0.527734 |
| CDC14A   | 0.976514 | 0.91504  | 1.042118 | 0.473754 |
| RAPGEF3  | 1.008987 | 0.927172 | 1.098022 | 0.835722 |
| CEACAM1  | 1.046336 | 0.999298 | 1.095589 | 0.053602 |
| SENP1    | 1.072034 | 0.978369 | 1.174667 | 0.135922 |
| DUSP13   | 1.026455 | 0.954182 | 1.104202 | 0.48334  |
| CIC      | 0.877215 | 0.814704 | 0.944522 | 0.000514 |
| LIPE     | 1.215044 | 1.118622 | 1.319778 | 3.89E-06 |
| FDFT1    | 1.016564 | 0.924437 | 1.117872 | 0.73465  |
| PAFAH1B3 | 1.10803  | 1.015886 | 1.208531 | 0.020571 |
| OPHN1    | 1.124284 | 1.049802 | 1.20405  | 0.000809 |
| KIF22    | 1.183723 | 1.077624 | 1.300268 | 0.000431 |
| PGM1     | 1.103608 | 1.031243 | 1.181051 | 0.004385 |
| DDX1     | 1.111332 | 1.014276 | 1.217675 | 0.023576 |
| DNM2     | 0.95773  | 0.87389  | 1.049614 | 0.355483 |
| EPB41L2  | 1.032291 | 0.983653 | 1.083335 | 0.196836 |
| STX7     | 0.990393 | 0.924849 | 1.060581 | 0.782289 |



|          |          |          |          |          |
|----------|----------|----------|----------|----------|
| RABL2B   | 1.149765 | 1.043251 | 1.267155 | 0.004899 |
| KEAP1    | 1.074416 | 0.984902 | 1.172066 | 0.105835 |
| DDX43    | 0.99466  | 0.913388 | 1.083163 | 0.902015 |
| PTPRH    | 0.82359  | 0.758582 | 0.894169 | 3.72E-06 |
| SLC35C2  | 0.9966   | 0.922343 | 1.076835 | 0.931294 |
| CRYBG3   | 1.054452 | 0.995822 | 1.116533 | 0.069289 |
| RFX3     | 0.968839 | 0.90273  | 1.03979  | 0.380003 |
| RIF1     | 0.977314 | 0.918272 | 1.040152 | 0.470446 |
| RAB21    | 0.976489 | 0.895144 | 1.065225 | 0.591867 |
| SLC4A4   | 1.213883 | 1.131739 | 1.30199  | 5.91E-08 |
| SMARCA2  | 0.872703 | 0.818118 | 0.930929 | 3.60E-05 |
| SESN1    | 0.955725 | 0.89645  | 1.018921 | 0.165685 |
| MID2     | 1.154082 | 1.010979 | 1.317441 | 0.03387  |
| SRCAP    | 0.940515 | 0.841534 | 1.051137 | 0.279727 |
| KCNN2    | 1.088231 | 1.026163 | 1.154054 | 0.004774 |
| CNOT4    | 0.928104 | 0.858286 | 1.003602 | 0.061503 |
| PSEN1    | 0.975753 | 0.900371 | 1.057445 | 0.549598 |
| CPOX     | 1.043463 | 0.983221 | 1.107396 | 0.160842 |
| CLDND1   | 0.966409 | 0.89365  | 1.045091 | 0.392227 |
| HSP90AA1 | 1.032954 | 0.949094 | 1.124223 | 0.452941 |
| RBL1     | 1.122249 | 1.047131 | 1.202756 | 0.001103 |
| DLGAP4   | 0.845806 | 0.775206 | 0.922835 | 0.000166 |
| IGSF9B   | 0.938476 | 0.842915 | 1.044872 | 0.246511 |
| NDC80    | 1.043013 | 0.970359 | 1.121107 | 0.252961 |
| AP4E1    | 1.015135 | 0.937293 | 1.099442 | 0.7121   |
| RSBN1    | 1.021658 | 0.942127 | 1.107903 | 0.604319 |
| MAGI3    | 1.083735 | 1.00633  | 1.167093 | 0.033431 |
| CXCL2    | 1.062034 | 1.020885 | 1.104841 | 0.002834 |
| COL4A4   | 1.112399 | 0.977055 | 1.266492 | 0.107556 |
| TCF7     | 0.980823 | 0.934601 | 1.029332 | 0.431768 |
| OSTM1    | 1.152457 | 1.067619 | 1.244036 | 0.000276 |
| IMPG2    | 1.153008 | 1.033695 | 1.286092 | 0.010632 |
| PCNP     | 1.009415 | 0.918458 | 1.10938  | 0.845782 |
| EXD2     | 1.047847 | 0.970914 | 1.130875 | 0.229639 |
| ARG2     | 1.039809 | 0.961876 | 1.124056 | 0.326057 |
| MEF2C    | 1.164373 | 1.106193 | 1.225614 | 5.92E-09 |
| PTPRC    | 0.994287 | 0.928665 | 1.064545 | 0.869357 |
| UBA5     | 1.061159 | 0.963846 | 1.168297 | 0.226429 |
| STK17B   | 0.966561 | 0.909437 | 1.027274 | 0.273854 |
| CDC14B   | 1.250449 | 1.135616 | 1.376894 | 5.43E-06 |
| ZNF510   | 1.117672 | 1.035687 | 1.206147 | 0.004209 |
| ZNF506   | 0.933545 | 0.872581 | 0.998767 | 0.04596  |
| JMJD4    | 1.250113 | 1.126471 | 1.387327 | 2.66E-05 |
| DUSP12   | 1.063005 | 0.963628 | 1.17263  | 0.222424 |
| AACS     | 1.138079 | 1.039234 | 1.246325 | 0.005269 |
| PHLPP1   | 0.959338 | 0.897886 | 1.024996 | 0.219067 |
| ATP8B1   | 1.01267  | 0.939526 | 1.091509 | 0.742037 |
| IL12RB2  | 1.134268 | 1.087824 | 1.182695 | 3.50E-09 |
| SMARCD3  | 1.00791  | 0.940414 | 1.080251 | 0.823701 |
| WDR70    | 1.083103 | 0.994781 | 1.179266 | 0.065857 |
| STRADB   | 1.019351 | 0.964283 | 1.077563 | 0.49879  |
| BZW1     | 0.994626 | 0.917397 | 1.078356 | 0.896035 |
| C1QTNF3  | 0.982489 | 0.904156 | 1.067609 | 0.676883 |
| ME2      | 0.990184 | 0.905298 | 1.083029 | 0.829202 |
| CCNT2    | 0.962329 | 0.901682 | 1.027057 | 0.247623 |
| FAM135A  | 0.857206 | 0.795808 | 0.923341 | 4.84E-05 |
| COL19A1  | 0.969927 | 0.892131 | 1.054508 | 0.474124 |
| EPB41L3  | 1.188608 | 1.120023 | 1.261393 | 1.21E-08 |

|          |          |          |          |          |
|----------|----------|----------|----------|----------|
| COBLL1   | 0.936258 | 0.873822 | 1.003155 | 0.061415 |
| DLG3     | 1.102545 | 1.008728 | 1.205087 | 0.031438 |
| TRAF5    | 0.887623 | 0.836371 | 0.942015 | 8.55E-05 |
| MRPL22   | 1.01448  | 0.901952 | 1.141046 | 0.810597 |
| GEMIN5   | 1.065487 | 0.993409 | 1.142794 | 0.075909 |
| NFE2L1   | 0.964005 | 0.89088  | 1.043132 | 0.362403 |
| GSK3B    | 1.03905  | 0.953675 | 1.132068 | 0.381206 |
| ITGB5    | 1.041611 | 0.98413  | 1.102449 | 0.159247 |
| ERC1     | 0.978715 | 0.903604 | 1.060071 | 0.597443 |
| XPO1     | 1.052495 | 0.976722 | 1.134146 | 0.179556 |
| RNF13    | 1.011501 | 0.939874 | 1.088586 | 0.76024  |
| PALB2    | 1.067005 | 0.974415 | 1.168394 | 0.161406 |
| LYRM2    | 1.13303  | 1.013675 | 1.266438 | 0.02787  |
| BCKDHB   | 1.059566 | 0.987065 | 1.137393 | 0.109612 |
| ULK2     | 1.07079  | 1.001651 | 1.144701 | 0.044599 |
| TNPO1    | 1.069244 | 0.999614 | 1.143724 | 0.051327 |
| PLOD1    | 1.034439 | 0.970109 | 1.103035 | 0.301323 |
| P2RX5    | 0.989821 | 0.931517 | 1.051774 | 0.741159 |
| ITGAE    | 1.086864 | 1.01202  | 1.167243 | 0.022126 |
| DIS3     | 0.954736 | 0.882256 | 1.03317  | 0.250185 |
| PIBF1    | 0.981215 | 0.909976 | 1.05803  | 0.621916 |
| TDRD3    | 1.022266 | 0.930278 | 1.123351 | 0.647138 |
| NUFIP1   | 0.972058 | 0.885274 | 1.06735  | 0.55255  |
| PDS5B    | 1.035123 | 0.959167 | 1.117093 | 0.374658 |
| OXCT1    | 1.150362 | 1.064885 | 1.242701 | 0.000377 |
| RRAGB    | 1.073314 | 0.993795 | 1.159196 | 0.071628 |
| CYLD     | 0.982172 | 0.921294 | 1.047071 | 0.581614 |
| SLC27A5  | 1.084208 | 0.927606 | 1.267248 | 0.309726 |
| ZNF324   | 1.047151 | 0.960917 | 1.141124 | 0.293376 |
| ZNF671   | 0.989981 | 0.919711 | 1.06562  | 0.788651 |
| ZNF416   | 1.067796 | 0.985219 | 1.157295 | 0.11019  |
| ZNF586   | 0.966946 | 0.906872 | 1.031    | 0.304375 |
| ZNF446   | 1.008232 | 0.899903 | 1.129602 | 0.887583 |
| ZNF264   | 0.982461 | 0.918682 | 1.050668 | 0.605372 |
| RPS5     | 0.911086 | 0.846265 | 0.980871 | 0.013403 |
| FAT1     | 1.074387 | 1.016003 | 1.136125 | 0.01184  |
| YTHDC1   | 0.928318 | 0.86678  | 0.994226 | 0.03355  |
| CHMP2B   | 1.021256 | 0.930801 | 1.120502 | 0.656682 |
| SMAP2    | 0.902616 | 0.836216 | 0.974288 | 0.008586 |
| PP1E     | 1.209016 | 1.093313 | 1.336964 | 0.000217 |
| ZMPSTE24 | 1.136183 | 1.038115 | 1.243516 | 0.005569 |
| STARD7   | 1.073437 | 0.984194 | 1.170772 | 0.109553 |
| REST     | 1.022691 | 0.9535   | 1.096903 | 0.530161 |
| HAL      | 0.917364 | 0.877369 | 0.959182 | 0.000149 |
| SSH1     | 0.936065 | 0.864165 | 1.013947 | 0.105169 |
| GSTP1    | 1.116271 | 1.034229 | 1.204822 | 0.004742 |
| APLP2    | 0.948621 | 0.884539 | 1.017344 | 0.139382 |
| WBP11    | 0.857483 | 0.78432  | 0.937471 | 0.000728 |
| EIF3I    | 0.916714 | 0.809586 | 1.038019 | 0.170228 |
| TXLNA    | 1.07442  | 0.996732 | 1.158163 | 0.060864 |
| NCOA1    | 0.926292 | 0.853247 | 1.005591 | 0.06771  |
| AGBL5    | 1.133586 | 1.026239 | 1.252161 | 0.013503 |
| EFR3B    | 1.043577 | 0.923995 | 1.178635 | 0.492129 |
| KIF3C    | 1.148168 | 1.062588 | 1.240641 | 0.000472 |
| RAB10    | 1.087379 | 1.0072   | 1.173939 | 0.032069 |
| HADHA    | 0.956924 | 0.868626 | 1.054197 | 0.3727   |
| MAPRE3   | 1.20306  | 1.096622 | 1.319829 | 9.17E-05 |
| CAD      | 1.044528 | 0.987008 | 1.1054   | 0.131692 |

|          |          |          |          |          |
|----------|----------|----------|----------|----------|
| CD59     | 1.159155 | 1.103261 | 1.217881 | 4.71E-09 |
| CD82     | 1.118554 | 1.052951 | 1.188243 | 0.00028  |
| BCORL1   | 0.943373 | 0.87171  | 1.020927 | 0.148134 |
| ATRX     | 1.022583 | 0.947241 | 1.103917 | 0.567392 |
| FCN1     | 1.041487 | 1.00615  | 1.078065 | 0.020994 |
| MYNN     | 0.983023 | 0.903348 | 1.069726 | 0.691342 |
| SCAMP1   | 1.035728 | 0.956599 | 1.121401 | 0.386644 |
| PREP     | 1.084557 | 0.995467 | 1.181621 | 0.063442 |
| HACE1    | 1.027887 | 0.955774 | 1.10544  | 0.458617 |
| SEH1L    | 0.984268 | 0.913439 | 1.06059  | 0.677299 |
| WDR47    | 1.012928 | 0.933542 | 1.099064 | 0.757726 |
| WDFY1    | 1.017433 | 0.950265 | 1.089348 | 0.619912 |
| OVGP1    | 1.018425 | 0.959975 | 1.080433 | 0.544906 |
| SLC25A24 | 1.038447 | 0.967281 | 1.114848 | 0.297619 |
| MAP3K4   | 1.019442 | 0.949008 | 1.095104 | 0.598093 |
| PILRA    | 0.946412 | 0.888568 | 1.008021 | 0.086957 |
| IGSF9    | 1.082348 | 1.013869 | 1.155453 | 0.017644 |
| ABCB1    | 0.922678 | 0.880825 | 0.96652  | 0.00068  |
| ZNF213   | 1.152058 | 1.035598 | 1.281614 | 0.009234 |
| AKR1B1   | 1.189629 | 1.109861 | 1.275131 | 9.42E-07 |
| CPNE3    | 1.125853 | 1.067585 | 1.187301 | 1.23E-05 |
| RRN3     | 1.004246 | 0.931095 | 1.083144 | 0.912563 |
| CTTN     | 1.063043 | 0.997898 | 1.132441 | 0.058127 |
| WNT11    | 0.968265 | 0.902074 | 1.039313 | 0.372043 |
| MTIF2    | 0.993857 | 0.900451 | 1.096953 | 0.902613 |
| DDHD2    | 1.033619 | 0.952931 | 1.121139 | 0.425248 |
| TTC39A   | 0.976119 | 0.899445 | 1.059331 | 0.562536 |
| EPS15    | 0.955239 | 0.89398  | 1.020697 | 0.17568  |
| MGST2    | 1.127657 | 1.043192 | 1.21896  | 0.002491 |
| CHERP    | 0.893346 | 0.817984 | 0.975651 | 0.012136 |
| ATG16L1  | 0.999937 | 0.930176 | 1.07493  | 0.998629 |
| USP40    | 1.134587 | 1.054912 | 1.22028  | 0.000676 |
| POMGNT1  | 1.155456 | 1.064461 | 1.254228 | 0.000555 |
| RAD54L   | 1.052265 | 0.974722 | 1.135977 | 0.192088 |
| MAST2    | 1.123246 | 1.038226 | 1.215228 | 0.003802 |
| DNAJA1   | 0.976941 | 0.892885 | 1.06891  | 0.611296 |
| B4GALT1  | 0.898486 | 0.837039 | 0.964444 | 0.00306  |
| CHMP5    | 1.077465 | 0.964758 | 1.203338 | 0.185662 |
| NFX1     | 0.954653 | 0.883944 | 1.031018 | 0.237221 |
| IPO11    | 1.041208 | 0.963435 | 1.12526  | 0.30796  |
| EIF2AK1  | 0.982183 | 0.905435 | 1.065437 | 0.664972 |
| EPDR1    | 1.060618 | 1.004719 | 1.119627 | 0.033141 |
| SNX10    | 1.107835 | 1.04256  | 1.177196 | 0.000949 |
| SEPHS1   | 1.129205 | 1.019386 | 1.250854 | 0.019923 |
| MRPL28   | 1.239513 | 1.085551 | 1.415311 | 0.001509 |
| HBQ1     | 1.018061 | 0.975296 | 1.062702 | 0.413634 |
| ITPKC    | 0.984419 | 0.905806 | 1.069855 | 0.711523 |
| CEACAM6  | 1.008159 | 0.978322 | 1.038907 | 0.596011 |
| FAT2     | 1.03917  | 0.905494 | 1.19258  | 0.584448 |
| RBM22    | 0.862933 | 0.787166 | 0.945992 | 0.001666 |
| TMED2    | 1.002813 | 0.915796 | 1.098099 | 0.95163  |
| ZFAND6   | 0.94791  | 0.890528 | 1.008989 | 0.093134 |
| PPEF1    | 1.302586 | 1.106615 | 1.533262 | 0.001484 |
| LAT2     | 1.208519 | 1.146331 | 1.274082 | 2.12E-12 |
| HUWE1    | 0.994646 | 0.928171 | 1.065881 | 0.879089 |
| ZW10     | 1.035511 | 0.952777 | 1.125429 | 0.411447 |
| ALG9     | 1.035302 | 0.934674 | 1.146764 | 0.506043 |
| MYBPC2   | 1.026302 | 0.948269 | 1.110756 | 0.519925 |

|          |          |          |          |          |
|----------|----------|----------|----------|----------|
| ACOX3    | 1.074611 | 0.997351 | 1.157857 | 0.058719 |
| MTMR2    | 0.8848   | 0.810819 | 0.965532 | 0.006009 |
| PPP1R15A | 0.894952 | 0.829745 | 0.965284 | 0.004036 |
| HSD17B14 | 1.424741 | 1.291442 | 1.571798 | 1.63E-12 |
| TRIP6    | 1.063452 | 1.003152 | 1.127376 | 0.038863 |
| ACHE     | 1.026586 | 0.971876 | 1.084376 | 0.347713 |
| FTL      | 0.902054 | 0.835901 | 0.973443 | 0.007987 |
| BAX      | 0.975813 | 0.875272 | 1.087902 | 0.658968 |
| NLK      | 1.020625 | 0.958264 | 1.087045 | 0.52565  |
| PIGS     | 1.077852 | 0.971915 | 1.195336 | 0.155526 |
| ADAMTS2  | 0.917754 | 0.870095 | 0.968024 | 0.001608 |
| ATXN7L3  | 0.939824 | 0.870033 | 1.015212 | 0.114919 |
| PGS1     | 1.049878 | 0.978291 | 1.126704 | 0.176743 |
| PSMC5    | 1.091575 | 0.966096 | 1.233353 | 0.159619 |
| UIMC1    | 0.935835 | 0.858999 | 1.019545 | 0.129234 |
| CETP     | 0.817505 | 0.763702 | 0.875099 | 6.59E-09 |
| MMP2     | 0.944012 | 0.909349 | 0.979996 | 0.002539 |
| LPCAT2   | 1.012279 | 0.953377 | 1.07482  | 0.689885 |
| OGFOD1   | 1.056455 | 0.959501 | 1.163206 | 0.263481 |
| SH3BP2   | 1.104775 | 1.031749 | 1.18297  | 0.004294 |
| NOP14    | 1.063221 | 0.958178 | 1.179781 | 0.248079 |
| ADD1     | 0.957138 | 0.869656 | 1.05342  | 0.370362 |
| L2HGDH   | 1.117236 | 1.011544 | 1.233971 | 0.028791 |
| TXNDC16  | 1.106336 | 1.025308 | 1.193767 | 0.009215 |
| NID2     | 1.027439 | 0.947058 | 1.114641 | 0.51488  |
| GMCL1    | 0.95035  | 0.878787 | 1.027742 | 0.202344 |
| SF3B2    | 1.000111 | 0.889178 | 1.124884 | 0.998526 |
| GNAS     | 0.85506  | 0.765384 | 0.955244 | 0.005606 |
| DNM1L    | 1.011945 | 0.929475 | 1.101731 | 0.784268 |
| PHACTR3  | 1.141326 | 1.094495 | 1.190161 | 6.25E-10 |
| ERGIC2   | 1.052518 | 0.980392 | 1.12995  | 0.15759  |
| AURKA    | 1.044443 | 0.976775 | 1.1168   | 0.203244 |
| CASS4    | 0.923368 | 0.867586 | 0.982737 | 0.012153 |
| PIR      | 1.215767 | 1.139981 | 1.296592 | 2.69E-09 |
| RFX2     | 1.196619 | 1.100973 | 1.300574 | 2.41E-05 |
| METTL2A  | 1.17123  | 1.058094 | 1.296464 | 0.002293 |
| SULT2B1  | 1.13315  | 1.006162 | 1.276166 | 0.039278 |
| ALG6     | 1.145041 | 1.052346 | 1.2459   | 0.001663 |
| CNOT3    | 0.900462 | 0.818152 | 0.991051 | 0.032052 |
| GP6      | 1.031776 | 0.988283 | 1.077183 | 0.154563 |
| PTPN4    | 1.052233 | 0.973844 | 1.136932 | 0.197407 |
| DDX18    | 1.108851 | 1.017467 | 1.208444 | 0.018544 |
| KHSRP    | 0.964549 | 0.886572 | 1.049383 | 0.401341 |
| GNA11    | 0.989024 | 0.908588 | 1.076581 | 0.798723 |
| EDEM2    | 0.971218 | 0.885236 | 1.065551 | 0.536903 |
| DNMT3B   | 1.152519 | 1.100097 | 1.207438 | 2.28E-09 |
| TPX2     | 1.091608 | 1.020787 | 1.167342 | 0.010434 |
| FER1L4   | 1.01747  | 0.896082 | 1.155302 | 0.789321 |
| PDRG1    | 0.96963  | 0.894564 | 1.050994 | 0.453149 |
| EPB41L1  | 0.981571 | 0.845645 | 1.139346 | 0.80678  |
| DOCK9    | 1.077754 | 1.003576 | 1.157415 | 0.039582 |
| ANKRD10  | 0.999366 | 0.919601 | 1.086049 | 0.988069 |
| TGDS     | 1.115373 | 1.016417 | 1.223962 | 0.021251 |
| DOCK3    | 0.989019 | 0.899642 | 1.087274 | 0.819264 |
| COQ9     | 1.222335 | 1.121688 | 1.332014 | 4.67E-06 |
| TMEM40   | 1.114558 | 1.008944 | 1.231228 | 0.032739 |
| KIF9     | 1.137504 | 1.020301 | 1.268171 | 0.020222 |
| CRLS1    | 1.020366 | 0.904167 | 1.151497 | 0.743794 |

|          |          |          |          |          |
|----------|----------|----------|----------|----------|
| PPP1R13B | 1.074389 | 0.993738 | 1.161585 | 0.071516 |
| ATRN     | 0.98384  | 0.916933 | 1.055628 | 0.650259 |
| SMOX     | 1.00038  | 0.955465 | 1.047405 | 0.987082 |
| SIGLEC1  | 1.030031 | 0.976979 | 1.085964 | 0.272772 |
| FKBP1A   | 1.206836 | 1.08964  | 1.336637 | 0.00031  |
| NSFL1C   | 1.117292 | 1.001878 | 1.246002 | 0.046186 |
| SLC4A11  | 0.962966 | 0.870873 | 1.064799 | 0.461862 |
| ZNF343   | 1.143572 | 1.035192 | 1.263299 | 0.008271 |
| EBF4     | 1.010587 | 0.950494 | 1.074478 | 0.736352 |
| CPXM1    | 0.949122 | 0.913698 | 0.985918 | 0.00713  |
| XRN2     | 0.924423 | 0.849566 | 1.005875 | 0.068151 |
| DYNLL1   | 1.10804  | 1.038425 | 1.182322 | 0.001943 |
| TESC     | 1.145891 | 1.090937 | 1.203615 | 5.60E-08 |
| SNX5     | 0.935053 | 0.850703 | 1.027768 | 0.163878 |
| RPL6     | 0.833568 | 0.770477 | 0.901825 | 5.81E-06 |
| SIRPG    | 1.044559 | 0.969046 | 1.125957 | 0.254838 |
| MAPKAPK  | 1.036339 | 0.941135 | 1.141172 | 0.467841 |
| P2RX7    | 1.032688 | 0.972742 | 1.096328 | 0.291792 |
| ESF1     | 1.024639 | 0.930839 | 1.127893 | 0.619263 |
| RBBP9    | 1.155515 | 1.057724 | 1.262347 | 0.001356 |
| ANAPC5   | 1.135128 | 1.039985 | 1.238976 | 0.004543 |
| SLC23A2  | 1.019304 | 0.9489   | 1.094932 | 0.60056  |
| KDM2B    | 0.981292 | 0.89107  | 1.080649 | 0.70114  |
| TASP1    | 0.980508 | 0.910522 | 1.055873 | 0.602363 |
| OAS1     | 1.011154 | 0.954502 | 1.071169 | 0.706129 |
| RPLP0    | 0.870761 | 0.807936 | 0.938472 | 0.000292 |
| PXN      | 0.895261 | 0.840483 | 0.95361  | 0.000594 |
| SIRT4    | 1.113357 | 0.983633 | 1.260191 | 0.089344 |
| KIF16B   | 1.12244  | 1.058065 | 1.190731 | 0.000127 |
| TRMT6    | 1.188161 | 1.094426 | 1.289924 | 3.92E-05 |
| PEBP1    | 0.981607 | 0.90401  | 1.065865 | 0.658614 |
| BRAP     | 0.939829 | 0.86619  | 1.019729 | 0.136047 |
| ERP29    | 0.941178 | 0.855706 | 1.035188 | 0.212022 |
| FUS      | 0.984748 | 0.908172 | 1.067782 | 0.709813 |
| IGBP1    | 0.853779 | 0.76967  | 0.947079 | 0.002812 |
| FXD5     | 0.924099 | 0.867775 | 0.984079 | 0.013887 |
| ZNF302   | 1.068443 | 0.98136  | 1.163253 | 0.126962 |
| GRAMD1A  | 0.865554 | 0.799511 | 0.937052 | 0.000363 |
| CMTM1    | 1.117991 | 1.037551 | 1.204668 | 0.003416 |
| KCNH4    | 1.12544  | 1.043006 | 1.214389 | 0.002327 |
| GANAB    | 0.959182 | 0.894976 | 1.027995 | 0.238435 |
| GMIP     | 0.91378  | 0.846804 | 0.986054 | 0.020256 |
| RBM41    | 1.197145 | 1.093363 | 1.310778 | 0.000101 |
| BIRC5    | 1.201176 | 1.125669 | 1.281748 | 3.14E-08 |
| LAG3     | 1.161969 | 1.0842   | 1.245316 | 2.16E-05 |
| MLF2     | 0.968694 | 0.864659 | 1.085247 | 0.583214 |
| OTUB2    | 1.003108 | 0.94587  | 1.063809 | 0.917563 |
| DDX24    | 0.963992 | 0.88907  | 1.045228 | 0.374335 |
| ZBTB25   | 1.02475  | 0.943748 | 1.112703 | 0.560619 |
| NECAP1   | 0.937256 | 0.871669 | 1.007778 | 0.080008 |
| ARHGAP4  | 1.064532 | 0.991448 | 1.143003 | 0.084839 |
| ANKRD24  | 1.350312 | 1.203754 | 1.514713 | 3.00E-07 |
| DHX32    | 0.866174 | 0.81126  | 0.924805 | 1.71E-05 |
| RCOR1    | 0.938973 | 0.8719   | 1.011205 | 0.095857 |
| LTBP4    | 1.065746 | 1.006172 | 1.128847 | 0.030037 |
| BLVRB    | 1.038151 | 0.987511 | 1.091387 | 0.142262 |
| SLC9A1   | 0.892037 | 0.827097 | 0.962076 | 0.003052 |
| SPTLC1   | 1.044649 | 0.938085 | 1.163319 | 0.426213 |

|           |          |          |          |          |
|-----------|----------|----------|----------|----------|
| PAPOLA    | 1.040615 | 0.948089 | 1.14217  | 0.402053 |
| CCNK      | 0.911895 | 0.840534 | 0.989315 | 0.026531 |
| PCBP4     | 0.985671 | 0.913016 | 1.064108 | 0.711809 |
| RGS1      | 1.034405 | 0.983914 | 1.087488 | 0.185231 |
| YPEL3     | 0.869419 | 0.794313 | 0.951626 | 0.002401 |
| MRPS33    | 1.025507 | 0.917197 | 1.146609 | 0.658294 |
| NDUFB2    | 1.18091  | 1.06824  | 1.305462 | 0.001153 |
| NUDC      | 1.16586  | 1.036601 | 1.311236 | 0.010482 |
| MAEA      | 1.037986 | 0.934885 | 1.152457 | 0.484868 |
| ICAM1     | 1.008981 | 0.959521 | 1.06099  | 0.727347 |
| STRN4     | 0.937107 | 0.857895 | 1.023633 | 0.14942  |
| IRAK3     | 0.960963 | 0.911866 | 1.012705 | 0.136712 |
| LYZ       | 0.961886 | 0.932549 | 0.992146 | 0.013937 |
| MUL1      | 1.035845 | 0.946678 | 1.133411 | 0.443184 |
| TFAP4     | 1.042715 | 0.954666 | 1.138886 | 0.35275  |
| PDCD7     | 0.992604 | 0.907982 | 1.085112 | 0.870297 |
| SPG21     | 1.122971 | 1.015291 | 1.24207  | 0.024131 |
| DNAJB11   | 0.910824 | 0.84584  | 0.9808   | 0.013387 |
| FLT3LG    | 1.179824 | 1.057203 | 1.316668 | 0.003142 |
| RAB11FIP3 | 0.952354 | 0.889322 | 1.019854 | 0.162334 |
| GNPTG     | 1.148924 | 1.017653 | 1.297128 | 0.02492  |
| ZNF268    | 1.107903 | 0.999823 | 1.227666 | 0.050396 |
| GOLGA3    | 0.969729 | 0.904337 | 1.03985  | 0.388171 |
| PABPC4    | 0.878008 | 0.797579 | 0.966548 | 0.007953 |
| CD209     | 1.173851 | 1.04234  | 1.321956 | 0.008194 |
| MCOLN1    | 1.082473 | 0.986008 | 1.188375 | 0.096095 |
| USP48     | 1.002969 | 0.932791 | 1.078427 | 0.93616  |
| EFNB1     | 1.019336 | 0.962839 | 1.079149 | 0.510345 |
| PDPR      | 0.988563 | 0.915318 | 1.06767  | 0.769633 |
| GLG1      | 1.110621 | 1.031457 | 1.19586  | 0.005421 |
| KIF4A     | 1.131692 | 1.063376 | 1.204397 | 9.85E-05 |
| TNRC6A    | 0.999993 | 0.934007 | 1.070641 | 0.999842 |
| PLEKHG2   | 0.965118 | 0.897089 | 1.038305 | 0.341078 |
| DLL3      | 0.83782  | 0.765624 | 0.916825 | 0.000119 |
| NAT14     | 0.823302 | 0.76537  | 0.88562  | 1.76E-07 |
| PITPNM2   | 0.943634 | 0.88061  | 1.011168 | 0.099958 |
| EXOC1     | 1.045487 | 0.968091 | 1.129071 | 0.256976 |
| RBM27     | 0.969123 | 0.898241 | 1.045598 | 0.418312 |
| OSBPL8    | 0.982124 | 0.917621 | 1.05116  | 0.602767 |
| DTX2      | 1.069122 | 0.977933 | 1.168814 | 0.141725 |
| NLRC4     | 0.978065 | 0.928639 | 1.030121 | 0.401863 |
| PUS7      | 1.052202 | 0.977555 | 1.132549 | 0.175314 |
| NRCAM     | 0.772971 | 0.685011 | 0.872226 | 2.94E-05 |
| LAMB1     | 0.995045 | 0.93797  | 1.055592 | 0.86908  |
| DLD       | 0.948123 | 0.87984  | 1.021704 | 0.162438 |
| WDR7      | 1.050242 | 0.984936 | 1.119878 | 0.134506 |
| TXNL1     | 0.955365 | 0.858549 | 1.063099 | 0.402269 |
| IL5RA     | 0.82153  | 0.776472 | 0.869201 | 8.45E-12 |
| ABCC6     | 0.973135 | 0.911068 | 1.039429 | 0.418002 |
| CMTM6     | 0.920315 | 0.854687 | 0.990982 | 0.027811 |
| ITGA6     | 1.015068 | 0.962931 | 1.070028 | 0.57828  |
| RAPGEF4   | 0.981293 | 0.877888 | 1.096877 | 0.739588 |
| FH        | 1.180254 | 1.083209 | 1.285992 | 0.000153 |
| SEL1L3    | 1.143335 | 1.091806 | 1.197296 | 1.25E-08 |
| CDV3      | 0.921374 | 0.844967 | 1.004691 | 0.063738 |
| MYO15A    | 0.997251 | 0.889002 | 1.118682 | 0.962553 |
| ALKBH5    | 0.973386 | 0.899984 | 1.052775 | 0.500114 |
| NLRP1     | 0.913629 | 0.864309 | 0.965763 | 0.001421 |

|          |          |          |          |          |
|----------|----------|----------|----------|----------|
| PITPNM3  | 1.019967 | 0.86454  | 1.203338 | 0.814689 |
| SPAG7    | 0.994226 | 0.886622 | 1.11489  | 0.921075 |
| ZC3HC1   | 1.099997 | 0.992575 | 1.219046 | 0.069093 |
| ESR1     | 1.45877  | 1.279554 | 1.663087 | 1.64E-08 |
| ANGPT2   | 1.075259 | 1.002908 | 1.152831 | 0.041186 |
| TMEM101  | 1.106782 | 1.002128 | 1.222364 | 0.045294 |
| CD200    | 0.952229 | 0.910493 | 0.995877 | 0.032303 |
| CCDC80   | 1.077805 | 0.925312 | 1.255429 | 0.335721 |
| CMA1     | 0.99458  | 0.870402 | 1.136475 | 0.936345 |
| PSME1    | 1.064601 | 0.971217 | 1.166963 | 0.181398 |
| PPP2R3C  | 0.978118 | 0.879359 | 1.087967 | 0.683695 |
| HAUS4    | 1.004289 | 0.914388 | 1.103028 | 0.928731 |
| JPH4     | 1.1583   | 1.03915  | 1.291112 | 0.007969 |
| CEBPE    | 0.950346 | 0.910277 | 0.992178 | 0.02049  |
| SLC7A8   | 1.030651 | 0.943985 | 1.125273 | 0.500523 |
| OSGEP    | 1.120327 | 1.020042 | 1.230472 | 0.017563 |
| SLC22A17 | 1.277431 | 1.192795 | 1.368072 | 2.55E-12 |
| RNF31    | 1.143971 | 1.007077 | 1.299473 | 0.038601 |
| SCFD1    | 0.956577 | 0.891452 | 1.02646  | 0.217193 |
| HECTD1   | 0.983421 | 0.92284  | 1.047978 | 0.606296 |
| HNRNPC   | 0.99227  | 0.896021 | 1.098858 | 0.8815   |
| RPGRIP1  | 0.786683 | 0.683653 | 0.90524  | 0.000808 |
| SUPT16H  | 1.134337 | 1.039178 | 1.23821  | 0.004808 |
| TOX4     | 0.947532 | 0.871646 | 1.030024 | 0.205727 |
| TGM1     | 1.045651 | 0.954224 | 1.145838 | 0.338955 |
| TINF2    | 1.041672 | 0.943366 | 1.150221 | 0.419531 |
| TBL1Y    | 1.042644 | 0.978738 | 1.110724 | 0.195661 |
| SEMA6A   | 1.029963 | 0.944972 | 1.122597 | 0.501666 |
| TRPM7    | 0.99279  | 0.924744 | 1.065843 | 0.841678 |
| TYRO3    | 1.350957 | 1.21763  | 1.498883 | 1.39E-08 |
| WDR76    | 1.076607 | 0.998592 | 1.160716 | 0.054447 |
| CAPN3    | 1.0121   | 0.946884 | 1.081809 | 0.723395 |
| SNAP23   | 0.93779  | 0.856738 | 1.026511 | 0.163732 |
| PHGDH    | 1.092776 | 1.029231 | 1.160245 | 0.003701 |
| COL9A3   | 0.918636 | 0.83022  | 1.016467 | 0.100252 |
| EZR      | 0.923606 | 0.862869 | 0.988617 | 0.022031 |
| MYL6     | 0.91416  | 0.815017 | 1.025363 | 0.125442 |
| TEKT2    | 0.941001 | 0.871377 | 1.016188 | 0.121017 |
| CLSPN    | 1.189444 | 1.108055 | 1.27681  | 1.61E-06 |
| RFFL     | 0.929774 | 0.860885 | 1.004174 | 0.063752 |
| UNC13D   | 0.984091 | 0.914944 | 1.058463 | 0.666154 |
| MFSD11   | 1.163663 | 1.051124 | 1.288252 | 0.003492 |
| DPYSL2   | 1.143414 | 1.100659 | 1.18783  | 5.48E-12 |
| GPATCH2  | 1.049126 | 0.955921 | 1.151419 | 0.312356 |
| NUP50    | 0.917261 | 0.854629 | 0.984482 | 0.016693 |
| COMT     | 0.994924 | 0.926139 | 1.068816 | 0.889263 |
| VNN3     | 1.0669   | 1.007752 | 1.129519 | 0.02606  |
| ECHDC1   | 1.058191 | 0.97993  | 1.142702 | 0.149076 |
| LRRFIP2  | 0.903897 | 0.838126 | 0.974831 | 0.00876  |
| SEC22C   | 1.056704 | 0.968559 | 1.152871 | 0.214563 |
| XYLB     | 1.161307 | 1.074901 | 1.254658 | 0.00015  |
| HDAC6    | 1.038732 | 0.959654 | 1.124326 | 0.346906 |
| CDC6     | 1.155456 | 1.072164 | 1.245218 | 0.000153 |
| UPRT     | 1.060421 | 0.963147 | 1.167519 | 0.232062 |
| CDC23    | 1.082645 | 0.990588 | 1.183257 | 0.079878 |
| AAAS     | 1.142973 | 1.040254 | 1.255835 | 0.005413 |
| CBX5     | 1.059002 | 0.991719 | 1.130851 | 0.086956 |
| MSH2     | 1.068838 | 0.987169 | 1.157263 | 0.100686 |

|          |          |          |          |          |
|----------|----------|----------|----------|----------|
| MAP3K1   | 0.905837 | 0.851254 | 0.963921 | 0.001816 |
| DHPS     | 1.025926 | 0.947892 | 1.110384 | 0.525994 |
| HOOK2    | 1.161834 | 1.051635 | 1.28358  | 0.003176 |
| ARCN1    | 0.996609 | 0.917938 | 1.082023 | 0.935477 |
| TMEM38B  | 1.258907 | 1.161456 | 1.364536 | 2.13E-08 |
| PSMD5    | 0.971087 | 0.895313 | 1.053274 | 0.479064 |
| PTGS1    | 1.112648 | 1.054483 | 1.174023 | 9.76E-05 |
| NUP188   | 1.042571 | 0.957427 | 1.135288 | 0.337509 |
| CRAT     | 1.17176  | 1.075989 | 1.276055 | 0.000269 |
| SH2D3C   | 1.130682 | 1.063176 | 1.202474 | 9.21E-05 |
| NANS     | 0.931383 | 0.851373 | 1.018912 | 0.120867 |
| TBC1D2   | 0.987547 | 0.928984 | 1.049803 | 0.687873 |
| PDE6C    | 1.007983 | 0.882601 | 1.151178 | 0.906602 |
| CWF19L1  | 1.01743  | 0.939031 | 1.102375 | 0.672759 |
| SEMA4G   | 1.143289 | 0.989278 | 1.321276 | 0.069687 |
| BTAF1    | 0.965439 | 0.915001 | 1.018658 | 0.198893 |
| IKZF5    | 0.943939 | 0.872917 | 1.020739 | 0.148285 |
| BLNK     | 1.12553  | 1.05462  | 1.201208 | 0.000368 |
| SORBS1   | 1.020058 | 0.952532 | 1.092371 | 0.56983  |
| BAMBI    | 1.073757 | 1.029655 | 1.119747 | 0.000882 |
| IL11     | 0.88908  | 0.830038 | 0.952322 | 0.000798 |
| WAC      | 0.9193   | 0.851462 | 0.992543 | 0.031449 |
| CREM     | 1.01091  | 0.928133 | 1.10107  | 0.803406 |
| NUBP2    | 1.182381 | 1.058095 | 1.321266 | 0.003111 |
| TPSD1    | 0.869249 | 0.839155 | 0.900423 | 6.46E-15 |
| HIVEP1   | 0.985475 | 0.923863 | 1.051196 | 0.6569   |
| TREM2    | 0.99628  | 0.932638 | 1.064265 | 0.911889 |
| KCNK16   | 0.910902 | 0.825443 | 1.005209 | 0.063369 |
| CRISP3   | 1.074232 | 1.044125 | 1.105207 | 7.93E-07 |
| FKBP5    | 1.025183 | 0.967429 | 1.086385 | 0.400525 |
| SRPK1    | 1.013002 | 0.949114 | 1.081191 | 0.697522 |
| BRPF3    | 0.985692 | 0.908042 | 1.069983 | 0.730672 |
| MRPS18A  | 1.328915 | 1.183609 | 1.492061 | 1.49E-06 |
| TMEM14A  | 1.375784 | 1.292783 | 1.464114 | 9.34E-24 |
| EFHC1    | 1.03302  | 0.935875 | 1.140249 | 0.51911  |
| NCR2     | 1.037853 | 0.982384 | 1.096455 | 0.184917 |
| HSP90AB1 | 0.962439 | 0.883208 | 1.048777 | 0.382424 |
| MLN      | 1.119429 | 0.994485 | 1.26007  | 0.061709 |
| CDC5L    | 0.930832 | 0.860748 | 1.006622 | 0.072701 |
| ITPR3    | 1.041217 | 0.982561 | 1.103375 | 0.172168 |
| ZNF184   | 1.049275 | 0.985341 | 1.117358 | 0.133724 |
| SIRT1    | 0.974845 | 0.904284 | 1.050911 | 0.506309 |
| HNRNPH3  | 0.951688 | 0.864602 | 1.047546 | 0.311868 |
| IFT74    | 1.074618 | 0.965508 | 1.196058 | 0.187703 |
| JAK2     | 1.003015 | 0.938882 | 1.071528 | 0.928855 |
| IL12RB1  | 1.10938  | 1.031882 | 1.192697 | 0.004963 |
| ABL1     | 0.936754 | 0.866765 | 1.012395 | 0.099139 |
| ACOT7    | 1.178886 | 1.09252  | 1.272079 | 2.24E-05 |
| SH3GLB1  | 0.893261 | 0.823542 | 0.968883 | 0.006481 |
| CDC7     | 1.135302 | 1.052515 | 1.224601 | 0.00102  |
| SYDE2    | 1.166665 | 1.102199 | 1.234902 | 1.07E-07 |
| PCSK5    | 1.361528 | 1.242375 | 1.492109 | 3.99E-11 |
| SCD      | 1.10819  | 1.053078 | 1.166186 | 7.91E-05 |
| TMED1    | 1.03317  | 0.924279 | 1.154889 | 0.565793 |
| ABLIM1   | 1.066456 | 1.016759 | 1.118583 | 0.008228 |
| ERMP1    | 1.09561  | 1.033208 | 1.16178  | 0.002274 |
| RAB18    | 0.933799 | 0.864854 | 1.008239 | 0.080068 |
| NRP1     | 0.906414 | 0.843363 | 0.97418  | 0.007561 |



|          |          |          |          |          |
|----------|----------|----------|----------|----------|
| HSD17B7P | 1.041482 | 0.967913 | 1.120644 | 0.276851 |
| PRTFDC1  | 1.130437 | 1.052221 | 1.214468 | 0.000804 |
| TSPAN15  | 1.131434 | 1.068831 | 1.197703 | 2.12E-05 |
| MAST3    | 1.05473  | 0.986232 | 1.127987 | 0.119876 |
| MZF1     | 1.05544  | 0.974959 | 1.142564 | 0.182428 |
| OCEL1    | 1.133426 | 1.035834 | 1.240213 | 0.006404 |
| MYO9B    | 0.942262 | 0.873277 | 1.016695 | 0.125244 |
| KCNK6    | 1.097637 | 1.03753  | 1.161227 | 0.001186 |
| PSMD8    | 1.171701 | 1.032042 | 1.330258 | 0.014404 |
| FBXL19   | 1.004174 | 0.942575 | 1.069799 | 0.897384 |
| STX1B    | 1.212494 | 1.092601 | 1.345543 | 0.000287 |
| HSD3B7   | 1.130703 | 1.046703 | 1.221444 | 0.001815 |
| SETD1A   | 0.941715 | 0.871485 | 1.017605 | 0.128853 |
| BCL7C    | 1.007563 | 0.883252 | 1.14937  | 0.910709 |
| CIRBP    | 1.064866 | 0.951466 | 1.19178  | 0.273966 |
| PRKY     | 1.024592 | 0.990531 | 1.059825 | 0.159008 |
| IGFALS   | 1.080103 | 0.991412 | 1.176729 | 0.077956 |
| HNRNPM   | 0.886453 | 0.8147   | 0.964527 | 0.005132 |
| NDUFB7   | 1.06123  | 0.986369 | 1.141774 | 0.111331 |
| TECR     | 1.109566 | 1.004694 | 1.225384 | 0.040131 |
| TIMM13   | 1.108876 | 1.016703 | 1.209404 | 0.019591 |
| CDC34    | 0.974571 | 0.887058 | 1.070717 | 0.591561 |
| MTAP     | 1.047398 | 0.971766 | 1.128916 | 0.225892 |
| POLR2E   | 1.163052 | 1.025434 | 1.31914  | 0.01873  |
| POLRMT   | 1.060718 | 0.976998 | 1.151613 | 0.159958 |
| HCN2     | 0.918522 | 0.827287 | 1.019819 | 0.111321 |
| RASSF7   | 1.137096 | 1.047959 | 1.233814 | 0.002038 |
| GADD45B  | 0.90442  | 0.850227 | 0.962067 | 0.001439 |
| PALM     | 0.903162 | 0.863743 | 0.944381 | 7.70E-06 |
| MADCAM1  | 1.241198 | 1.009923 | 1.525436 | 0.039994 |
| MKNK2    | 0.865633 | 0.806903 | 0.928638 | 5.69E-05 |
| ARVCF    | 0.956415 | 0.901145 | 1.015076 | 0.142297 |
| TRMT2A   | 1.046177 | 0.9666   | 1.132307 | 0.263408 |
| RANBP1   | 1.121051 | 1.018157 | 1.234344 | 0.020003 |
| ZDHHC8   | 0.90977  | 0.845905 | 0.978458 | 0.010884 |
| KLHL22   | 1.076938 | 0.996756 | 1.16357  | 0.060428 |
| MED15    | 0.934984 | 0.859099 | 1.017571 | 0.119555 |
| SERPIND1 | 1.018476 | 0.958515 | 1.082187 | 0.55429  |
| SNAP29   | 1.087011 | 0.972544 | 1.21495  | 0.141676 |
| CRKL     | 0.982766 | 0.909534 | 1.061894 | 0.659935 |
| LZTR1    | 1.209121 | 1.09522  | 1.334866 | 0.000169 |
| MMP11    | 1.33345  | 1.201516 | 1.479872 | 6.18E-08 |
| CECR2    | 1.229521 | 1.092494 | 1.383734 | 0.00061  |
| SMARCB1  | 1.107052 | 0.993914 | 1.233068 | 0.064462 |
| DERL3    | 1.140668 | 1.015322 | 1.281487 | 0.026692 |
| BCL2L13  | 0.95177  | 0.864343 | 1.04804  | 0.314651 |
| DDTL     | 1.078224 | 1.007161 | 1.154302 | 0.03038  |
| OSM      | 1.020263 | 0.970044 | 1.073082 | 0.435999 |
| CABIN1   | 1.062532 | 0.979408 | 1.152712 | 0.14447  |
| TBC1D10A | 1.028746 | 0.956052 | 1.106968 | 0.448474 |
| SUSD2    | 1.127829 | 1.018823 | 1.248498 | 0.020365 |
| SF3A1    | 0.926662 | 0.843061 | 1.018553 | 0.114361 |
| GGT5     | 0.930284 | 0.883786 | 0.97923  | 0.00574  |
| RNF215   | 1.1729   | 1.052087 | 1.307585 | 0.004034 |
| SEC14L2  | 1.143566 | 1.061998 | 1.231399 | 0.000381 |
| SEC14L3  | 1.117417 | 1.004915 | 1.242514 | 0.040314 |
| PPIL2    | 1.06629  | 0.978249 | 1.162254 | 0.144345 |
| UPB1     | 1.101778 | 1.031235 | 1.177147 | 0.004092 |

|         |          |          |          |          |
|---------|----------|----------|----------|----------|
| YPEL1   | 1.113495 | 1.029216 | 1.204676 | 0.007427 |
| SNRPD3  | 1.127931 | 1.031616 | 1.233239 | 0.008207 |
| PES1    | 1.022904 | 0.931948 | 1.122737 | 0.63364  |
| MAPK1   | 0.985684 | 0.908895 | 1.068961 | 0.727505 |
| GGT1    | 1.086276 | 0.970023 | 1.21646  | 0.151869 |
| PRODH   | 0.961668 | 0.885927 | 1.043885 | 0.350392 |
| PPM1F   | 1.069219 | 0.998728 | 1.144687 | 0.054433 |
| SLC35E4 | 1.102337 | 1.015666 | 1.196404 | 0.0197   |
| TOP3B   | 1.089743 | 0.933306 | 1.272401 | 0.277043 |
| CYTH4   | 1.083575 | 1.028593 | 1.141496 | 0.002519 |
| MFNG    | 1.010474 | 0.942448 | 1.083409 | 0.76951  |
| CARD10  | 1.029926 | 0.921808 | 1.150725 | 0.60229  |
| LRP5L   | 0.884902 | 0.839788 | 0.932439 | 4.65E-06 |
| SLC25A1 | 0.923122 | 0.859066 | 0.991953 | 0.029246 |
| LGALS2  | 1.012924 | 0.97981  | 1.047157 | 0.448929 |
| GGA1    | 0.955566 | 0.87391  | 1.044852 | 0.318634 |
| HIRA    | 0.949033 | 0.863759 | 1.042725 | 0.27615  |
| SH3BP1  | 1.13221  | 1.030653 | 1.243773 | 0.009607 |
| SEZ6L   | 0.892178 | 0.822478 | 0.967784 | 0.005978 |
| LGALS1  | 1.091425 | 1.045133 | 1.139768 | 7.61E-05 |
| HPS4    | 1.00059  | 0.926213 | 1.080939 | 0.988068 |
| PIK3IP1 | 0.94895  | 0.896915 | 1.004004 | 0.068592 |
| SRRD    | 1.10346  | 1.006618 | 1.209619 | 0.035666 |
| PATZ1   | 0.997842 | 0.922438 | 1.079411 | 0.957033 |
| TRIOBP  | 1.014222 | 0.919103 | 1.119184 | 0.778671 |
| TFIP11  | 1.064812 | 0.978856 | 1.158315 | 0.143651 |
| GCAT    | 1.091854 | 1.02428  | 1.163885 | 0.007019 |
| CRYBB1  | 1.225907 | 1.097389 | 1.369476 | 0.000313 |
| ANKRD54 | 1.142909 | 1.042226 | 1.253318 | 0.004526 |
| EIF3L   | 0.858069 | 0.793232 | 0.928206 | 0.000134 |
| MICALL1 | 0.984841 | 0.916888 | 1.057831 | 0.67541  |
| POLR2F  | 1.168278 | 1.035985 | 1.317465 | 0.011196 |
| SOX10   | 1.01612  | 0.876163 | 1.178435 | 0.832496 |
| CCDC134 | 1.032765 | 0.962854 | 1.107752 | 0.367328 |
| DEPDC5  | 1.042058 | 0.966057 | 1.124038 | 0.286317 |
| PICK1   | 1.02237  | 0.939542 | 1.112501 | 0.607788 |
| TTC28   | 1.032101 | 0.974858 | 1.092705 | 0.277785 |
| SLC16A8 | 1.13555  | 1.061583 | 1.214672 | 0.000217 |
| CENPM   | 1.165535 | 1.081697 | 1.255872 | 5.77E-05 |
| SLC5A4  | 0.937225 | 0.854721 | 1.027693 | 0.16791  |
| KDELR3  | 0.992565 | 0.941366 | 1.046549 | 0.782412 |
| CYP2D6  | 1.07074  | 0.993282 | 1.15424  | 0.074421 |
| DDX17   | 1.016941 | 0.954618 | 1.083333 | 0.602625 |
| DMC1    | 1.03358  | 0.937705 | 1.139258 | 0.506061 |
| TCF20   | 1.029594 | 0.958841 | 1.105569 | 0.42204  |
| HSCB    | 1.03667  | 0.925427 | 1.161285 | 0.534055 |
| CBY1    | 1.200518 | 1.083498 | 1.330176 | 0.000478 |
| TOMM22  | 1.037884 | 0.938441 | 1.147865 | 0.469317 |
| XBP1    | 0.911918 | 0.845171 | 0.983936 | 0.017428 |
| JOSD1   | 0.888277 | 0.819216 | 0.96316  | 0.004118 |
| FBXO7   | 0.946097 | 0.8667   | 1.032767 | 0.21534  |
| GTPBP1  | 0.931902 | 0.872366 | 0.995501 | 0.036275 |
| POLDIP3 | 0.887507 | 0.811522 | 0.970607 | 0.008968 |
| RAB36   | 1.059634 | 0.930095 | 1.207216 | 0.383936 |
| TIMP3   | 1.103582 | 1.062474 | 1.146281 | 3.60E-07 |
| SBF1    | 0.986114 | 0.927651 | 1.048262 | 0.653846 |
| CYB5R3  | 0.971882 | 0.873618 | 1.081198 | 0.599972 |
| DNAL4   | 1.055265 | 0.959515 | 1.160569 | 0.267688 |

|          |          |          |          |          |
|----------|----------|----------|----------|----------|
| LMF2     | 1.003616 | 0.915956 | 1.099667 | 0.938295 |
| RHBDD3   | 1.113276 | 1.021254 | 1.213591 | 0.01478  |
| PACSIN2  | 0.953245 | 0.881887 | 1.030376 | 0.227746 |
| TTLL1    | 1.167534 | 1.071824 | 1.271791 | 0.000386 |
| RASL10A  | 0.818359 | 0.762613 | 0.87818  | 2.57E-08 |
| AP1B1    | 0.894809 | 0.828566 | 0.966347 | 0.004621 |
| HMGXB4   | 1.058132 | 0.972443 | 1.151371 | 0.189714 |
| TOM1     | 0.901977 | 0.838783 | 0.969931 | 0.005373 |
| NEFH     | 0.935333 | 0.853086 | 1.02551  | 0.154573 |
| CHKB     | 1.246757 | 1.102015 | 1.41051  | 0.00046  |
| BIK      | 1.063724 | 1.002913 | 1.128224 | 0.039706 |
| HMOX1    | 1.005754 | 0.96321  | 1.050177 | 0.794738 |
| MCAT     | 1.056702 | 0.956268 | 1.167684 | 0.279082 |
| THOC5    | 1.0442   | 0.947187 | 1.151149 | 0.38465  |
| MCM5     | 1.103463 | 1.015751 | 1.198749 | 0.019818 |
| APOBEC3f | 1.235665 | 1.144092 | 1.334567 | 7.19E-08 |
| ARSA     | 1.02341  | 0.951948 | 1.100235 | 0.530948 |
| TSPO     | 1.014399 | 0.959528 | 1.072409 | 0.614349 |
| RASD2    | 1.011747 | 0.933869 | 1.09612  | 0.775048 |
| TTLL12   | 1.068232 | 1.006913 | 1.133285 | 0.028641 |
| CBX7     | 1.08671  | 1.017642 | 1.160465 | 0.013066 |
| PDGFB    | 0.981731 | 0.879407 | 1.095961 | 0.742674 |
| ACR      | 1.068281 | 0.97605  | 1.169228 | 0.151639 |
| CABP7    | 1.059035 | 0.933091 | 1.201979 | 0.374585 |
| RPL3     | 0.857899 | 0.788651 | 0.933226 | 0.000358 |
| ZMAT5    | 1.149899 | 1.011713 | 1.306961 | 0.032498 |
| SYNGR1   | 0.848027 | 0.802579 | 0.896049 | 4.48E-09 |
| ASCC2    | 1.096907 | 0.992122 | 1.212759 | 0.070985 |
| MTMR3    | 0.968897 | 0.902725 | 1.03992  | 0.381342 |
| APOL4    | 1.178801 | 1.109479 | 1.252454 | 1.04E-07 |
| APOL1    | 1.144445 | 1.069135 | 1.225059 | 0.000102 |
| PNPLA3   | 1.455895 | 1.304731 | 1.624573 | 1.87E-11 |
| MYH9     | 0.93464  | 0.870494 | 1.003513 | 0.062419 |
| CACNA1I  | 1.080628 | 0.955695 | 1.221893 | 0.216074 |
| SAMM50   | 1.235649 | 1.101705 | 1.385879 | 0.000301 |
| TXN2     | 1.11609  | 1.003939 | 1.240771 | 0.042081 |
| FOXRED2  | 1.166552 | 1.093527 | 1.244455 | 3.00E-06 |
| GRAP2    | 0.991124 | 0.93408  | 1.051652 | 0.768163 |
| EIF3D    | 0.859494 | 0.777559 | 0.950062 | 0.003055 |
| TNRC6B   | 0.98979  | 0.932482 | 1.05062  | 0.735927 |
| SGSM3    | 1.08075  | 0.942222 | 1.239645 | 0.267177 |
| NCF4     | 1.077853 | 1.001779 | 1.159704 | 0.04469  |
| CSF2RB   | 0.995557 | 0.948556 | 1.044887 | 0.856786 |
| SLC25A17 | 1.161955 | 1.065509 | 1.26713  | 0.000686 |
| UPK3A    | 1.112356 | 1.054298 | 1.173611 | 9.89E-05 |
| FAM118A  | 1.035978 | 0.966963 | 1.109919 | 0.314955 |
| KCTD17   | 1.272694 | 1.182429 | 1.369851 | 1.32E-10 |
| ST13     | 0.868144 | 0.789469 | 0.954659 | 0.003531 |
| IL2RB    | 1.027897 | 0.971046 | 1.088076 | 0.343214 |
| RBX1     | 1.10712  | 0.995062 | 1.231798 | 0.061616 |
| EP300    | 0.943862 | 0.877956 | 1.014716 | 0.117724 |
| L3MBTL2  | 1.160248 | 1.050724 | 1.281188 | 0.003303 |
| CHADL    | 1.041391 | 0.967554 | 1.120863 | 0.279741 |
| RANGAP1  | 1.0652   | 0.978159 | 1.159987 | 0.146438 |
| ZC3H7B   | 1.029025 | 0.954859 | 1.10895  | 0.453453 |
| PHF5A    | 0.987535 | 0.88317  | 1.104234 | 0.825795 |
| ACO2     | 1.005792 | 0.91508  | 1.105496 | 0.904676 |
| POLR3H   | 1.00327  | 0.916248 | 1.098556 | 0.943783 |

|          |          |          |          |          |
|----------|----------|----------|----------|----------|
| TRMU     | 1.114353 | 1.024836 | 1.211689 | 0.011272 |
| PMM1     | 1.144924 | 1.046365 | 1.252767 | 0.003211 |
| CERK     | 0.954163 | 0.891415 | 1.021328 | 0.176404 |
| BRD1     | 1.023885 | 0.95719  | 1.095227 | 0.492184 |
| ZBED4    | 1.002274 | 0.931258 | 1.078706 | 0.951691 |
| MLC1     | 1.007056 | 0.963347 | 1.052748 | 0.756126 |
| HDAC10   | 1.292229 | 1.090469 | 1.531318 | 0.003077 |
| KCNK10   | 1.185441 | 1.083867 | 1.296533 | 0.000198 |
| ABHD4    | 0.935889 | 0.877504 | 0.998158 | 0.043792 |
| KHNYN    | 1.002049 | 0.939781 | 1.068441 | 0.950147 |
| FKBP3    | 1.100927 | 0.993852 | 1.219538 | 0.065499 |
| SDR39U1  | 1.145483 | 1.031321 | 1.272282 | 0.011222 |
| CTSG     | 1.045802 | 1.01782  | 1.074555 | 0.001211 |
| GZMH     | 1.052833 | 0.995597 | 1.113359 | 0.071036 |
| GZMB     | 1.083259 | 1.029547 | 1.139773 | 0.002055 |
| RBM23    | 0.98067  | 0.895245 | 1.074247 | 0.674661 |
| PRMT5    | 1.130653 | 1.032316 | 1.238357 | 0.008168 |
| COCH     | 0.93861  | 0.875078 | 1.006753 | 0.076438 |
| AP4S1    | 0.998086 | 0.923017 | 1.07926  | 0.961697 |
| POLE2    | 1.064732 | 0.984066 | 1.15201  | 0.118673 |
| SOS2     | 0.914623 | 0.852135 | 0.981694 | 0.013449 |
| CDKL1    | 1.063974 | 0.968792 | 1.168508 | 0.194673 |
| NIN      | 0.978952 | 0.907409 | 1.056136 | 0.582728 |
| PYGL     | 0.933425 | 0.883682 | 0.985968 | 0.013675 |
| TRIM9    | 1.30282  | 1.143018 | 1.484964 | 7.43E-05 |
| PSMC6    | 0.978488 | 0.899289 | 1.064662 | 0.613565 |
| GNPNAT1  | 1.041626 | 0.939674 | 1.15464  | 0.437741 |
| DDHD1    | 0.957584 | 0.893806 | 1.025914 | 0.217775 |
| CDKN3    | 1.218733 | 1.123588 | 1.321935 | 1.85E-06 |
| CGRRF1   | 1.225018 | 1.090174 | 1.376542 | 0.000647 |
| ATP6V1D  | 1.063755 | 0.971875 | 1.164323 | 0.179926 |
| PLEK2    | 1.005252 | 0.950778 | 1.062846 | 0.853803 |
| PIGH     | 1.065384 | 0.971984 | 1.16776  | 0.17607  |
| PSMA3    | 0.992403 | 0.8977   | 1.097096 | 0.881523 |
| VT11B    | 1.124191 | 1.004628 | 1.257984 | 0.041307 |
| TIMM9    | 0.90765  | 0.816558 | 1.008903 | 0.072541 |
| GSTZ1    | 0.978055 | 0.864115 | 1.10702  | 0.725502 |
| KIAA0586 | 1.083996 | 0.996712 | 1.178924 | 0.059691 |
| TMED8    | 1.009224 | 0.938299 | 1.085511 | 0.804928 |
| AHSA1    | 1.145784 | 1.042478 | 1.259326 | 0.004759 |
| DAAM1    | 1.119377 | 1.041866 | 1.202654 | 0.002069 |
| SPTLC2   | 0.99876  | 0.932071 | 1.070222 | 0.971939 |
| RIN3     | 0.927788 | 0.858782 | 1.002338 | 0.057336 |
| LGMN     | 0.996092 | 0.937737 | 1.058077 | 0.898833 |
| ALKBH1   | 1.138446 | 1.026031 | 1.263177 | 0.014508 |
| SNW1     | 0.955607 | 0.86045  | 1.061288 | 0.39617  |
| CHGA     | 1.019986 | 0.934666 | 1.113094 | 0.657039 |
| ITPK1    | 1.085441 | 0.99673  | 1.182048 | 0.059475 |
| DHRS7    | 0.942728 | 0.861875 | 1.031165 | 0.197348 |
| PPM1A    | 0.965737 | 0.898257 | 1.038287 | 0.345506 |
| ASB2     | 1.115888 | 1.031194 | 1.207538 | 0.006475 |
| ERH      | 1.213373 | 1.107042 | 1.329918 | 3.58E-05 |
| HIF1A    | 0.929961 | 0.875827 | 0.98744  | 0.017643 |
| SLC10A1  | 1.00502  | 0.960144 | 1.051994 | 0.829886 |
| EIF5     | 1.015895 | 0.940488 | 1.097347 | 0.688607 |
| SLC8A3   | 1.084153 | 1.017335 | 1.155359 | 0.012792 |
| DICER1   | 0.970408 | 0.912111 | 1.032431 | 0.341967 |
| ZFYVE21  | 1.063365 | 0.961151 | 1.176449 | 0.233449 |

|          |          |          |          |          |
|----------|----------|----------|----------|----------|
| MTHFD1   | 1.061488 | 0.977726 | 1.152425 | 0.154782 |
| TCL1A    | 1.068962 | 1.011304 | 1.129908 | 0.018408 |
| ZC3H14   | 0.975201 | 0.866632 | 1.09737  | 0.676673 |
| TELO2    | 0.977074 | 0.918407 | 1.039489 | 0.462885 |
| VRK1     | 1.083296 | 0.995605 | 1.178711 | 0.063213 |
| PSMC1    | 0.938527 | 0.831444 | 1.059402 | 0.3047   |
| PAPLN    | 1.065676 | 0.994865 | 1.141527 | 0.069801 |
| RPS6KA5  | 1.046566 | 0.969087 | 1.130238 | 0.24613  |
| PSMB5    | 1.140192 | 1.038481 | 1.251865 | 0.005923 |
| YY1      | 0.965542 | 0.886924 | 1.05113  | 0.418398 |
| ACIN1    | 0.945308 | 0.876121 | 1.019959 | 0.146957 |
| CCNB1IP1 | 0.912396 | 0.840457 | 0.990492 | 0.028673 |
| TRIP11   | 1.054099 | 0.961537 | 1.155571 | 0.261209 |
| APEX1    | 0.956481 | 0.876943 | 1.043234 | 0.315159 |
| PABPN1   | 0.934873 | 0.862936 | 1.012808 | 0.09926  |
| ARHGAP5  | 1.01018  | 0.966394 | 1.055951 | 0.654146 |
| CINP     | 0.97997  | 0.851774 | 1.12746  | 0.777285 |
| SRP54    | 1.019353 | 0.932736 | 1.114013 | 0.672252 |
| CHD8     | 0.970531 | 0.89821  | 1.048676 | 0.449022 |
| PCK2     | 0.961629 | 0.88846  | 1.040824 | 0.332538 |
| PSMA6    | 1.086348 | 0.991382 | 1.190411 | 0.075979 |
| NFKBIA   | 1.023594 | 0.953436 | 1.098914 | 0.519758 |
| PSME2    | 1.264455 | 1.156977 | 1.381916 | 2.25E-07 |
| BRMS1L   | 0.902772 | 0.825823 | 0.98689  | 0.02443  |
| REC8     | 1.022769 | 0.964475 | 1.084586 | 0.452097 |
| TM9SF1   | 1.007371 | 0.915843 | 1.108046 | 0.879887 |
| SEC23A   | 0.918443 | 0.848148 | 0.994565 | 0.03625  |
| GMPR2    | 0.949664 | 0.859463 | 1.049331 | 0.31044  |
| PNN      | 0.893498 | 0.820427 | 0.973076 | 0.009683 |
| RABGGTA  | 1.104086 | 0.978098 | 1.246303 | 0.109213 |
| NFATC4   | 1.307153 | 1.187255 | 1.43916  | 4.85E-08 |
| PLTP     | 0.91365  | 0.855232 | 0.976058 | 0.007389 |
| PCIF1    | 1.095877 | 0.97189  | 1.235682 | 0.135037 |
| GSS      | 1.077325 | 0.970314 | 1.196138 | 0.162899 |
| MMP9     | 1.013556 | 0.981928 | 1.046203 | 0.405164 |
| TRPC4AP  | 0.92673  | 0.858568 | 1.000304 | 0.050919 |
| PYGB     | 0.875315 | 0.817134 | 0.937638 | 0.000148 |
| ABHD12   | 1.034558 | 0.943572 | 1.134318 | 0.469469 |
| PROCR    | 1.010753 | 0.92257  | 1.107364 | 0.818382 |
| GINS1    | 1.117279 | 1.050049 | 1.188813 | 0.000461 |
| NINL     | 1.160343 | 1.067374 | 1.26141  | 0.000483 |
| CD40     | 1.042673 | 0.985454 | 1.103214 | 0.146743 |
| ZMYND8   | 0.975047 | 0.916553 | 1.037275 | 0.423391 |
| SGK2     | 1.133041 | 0.978567 | 1.3119   | 0.094872 |
| IFT52    | 1.002547 | 0.90217  | 1.114093 | 0.962301 |
| MYBL2    | 1.080966 | 1.015961 | 1.150129 | 0.013879 |
| NDRG3    | 0.966971 | 0.895374 | 1.044294 | 0.39215  |
| SLA2     | 0.973812 | 0.919786 | 1.03101  | 0.362153 |
| NFATC2   | 1.020561 | 0.95773  | 1.087513 | 0.530153 |
| PABPC1L  | 1.038674 | 0.972373 | 1.109496 | 0.259534 |
| STK4     | 1.006722 | 0.936638 | 1.08205  | 0.855599 |
| SALL4    | 1.270932 | 1.195231 | 1.351427 | 1.98E-14 |
| ADNP     | 0.993188 | 0.927502 | 1.063526 | 0.844782 |
| PFDN4    | 1.035257 | 0.945894 | 1.133064 | 0.451876 |
| DOK5     | 1.195355 | 1.112934 | 1.283879 | 9.81E-07 |
| CSTF1    | 1.003159 | 0.911366 | 1.104197 | 0.948641 |
| RAE1     | 1.083064 | 0.974158 | 1.204145 | 0.14001  |
| TPD52L2  | 0.961261 | 0.880999 | 1.048836 | 0.374469 |

|          |          |          |          |          |
|----------|----------|----------|----------|----------|
| DNAJC5   | 0.983768 | 0.922891 | 1.04866  | 0.615571 |
| CTSZ     | 0.954669 | 0.904428 | 1.007702 | 0.092604 |
| PRPF6    | 0.990422 | 0.896035 | 1.094751 | 0.850602 |
| TUBB1    | 1.040129 | 0.989231 | 1.093646 | 0.124294 |
| PSMA7    | 1.137982 | 1.00029  | 1.294629 | 0.049488 |
| SLCO4A1  | 1.013543 | 0.952575 | 1.078412 | 0.670847 |
| NTSR1    | 1.096402 | 1.031453 | 1.165441 | 0.003138 |
| TCFL5    | 1.109537 | 1.023518 | 1.202784 | 0.011584 |
| DIDO1    | 0.996139 | 0.93323  | 1.063288 | 0.907466 |
| SLC17A9  | 0.887476 | 0.843304 | 0.933961 | 4.59E-06 |
| BIRC7    | 1.061911 | 0.963202 | 1.170736 | 0.227518 |
| ARFGAP1  | 0.975737 | 0.913265 | 1.042482 | 0.466871 |
| AVP      | 0.991804 | 0.912171 | 1.078389 | 0.847182 |
| COL20A1  | 0.909404 | 0.825379 | 1.001983 | 0.054869 |
| EEF1A2   | 1.034982 | 0.973115 | 1.100782 | 0.274233 |
| PTK6     | 1.189848 | 1.111894 | 1.273266 | 4.96E-07 |
| GMEB2    | 0.936357 | 0.870664 | 1.007006 | 0.076422 |
| CDC25B   | 1.157218 | 1.074179 | 1.246676 | 0.000121 |
| ISM1     | 1.181943 | 1.021802 | 1.367182 | 0.02443  |
| RNF24    | 0.960369 | 0.890689 | 1.0355   | 0.292691 |
| ARFRP1   | 1.116269 | 1.025555 | 1.215006 | 0.010975 |
| TRIB3    | 0.952896 | 0.89855  | 1.010528 | 0.107306 |
| RASSF2   | 1.000482 | 0.937898 | 1.067243 | 0.988327 |
| CSNK2A1  | 0.990478 | 0.898231 | 1.092198 | 0.84788  |
| CDS2     | 0.905127 | 0.846622 | 0.967674 | 0.003458 |
| HM13     | 1.002078 | 0.908858 | 1.104861 | 0.966758 |
| SNPH     | 1.144356 | 1.07064  | 1.223147 | 7.21E-05 |
| MYLK2    | 1.01401  | 0.872988 | 1.177812 | 0.855509 |
| SIRPB1   | 1.049165 | 1.001592 | 1.098997 | 0.042646 |
| SEC23B   | 1.109129 | 1.018675 | 1.207615 | 0.017022 |
| FERMT1   | 1.233251 | 1.142775 | 1.330889 | 6.93E-08 |
| PLCB4    | 1.191297 | 1.136965 | 1.248226 | 1.99E-13 |
| MYL9     | 0.956061 | 0.888978 | 1.028207 | 0.226064 |
| HCK      | 1.069331 | 1.016038 | 1.12542  | 0.010172 |
| TM9SF4   | 1.029943 | 0.932661 | 1.137373 | 0.560013 |
| CRNKL1   | 1.071952 | 0.979629 | 1.172977 | 0.130517 |
| POFUT1   | 1.018385 | 0.936983 | 1.106859 | 0.668204 |
| SAMHD1   | 1.067007 | 1.024648 | 1.111117 | 0.001701 |
| KIF3B    | 0.989979 | 0.911005 | 1.075798 | 0.812307 |
| NOP56    | 1.138968 | 1.04753  | 1.238388 | 0.002308 |
| MANBAL   | 1.079152 | 0.992408 | 1.173477 | 0.074795 |
| IDH3B    | 1.112484 | 0.98371  | 1.258116 | 0.089454 |
| MAPRE1   | 0.900425 | 0.829875 | 0.976974 | 0.01175  |
| JAG1     | 0.982609 | 0.940233 | 1.026895 | 0.435388 |
| CDK5RAP1 | 1.025255 | 0.932039 | 1.127793 | 0.608071 |
| SNTA1    | 1.095835 | 1.019138 | 1.178304 | 0.013435 |
| OXT      | 0.924205 | 0.852778 | 1.001614 | 0.054775 |
| E2F1     | 0.976106 | 0.910993 | 1.045874 | 0.492345 |
| RPRD1B   | 0.967338 | 0.912058 | 1.025968 | 0.268698 |
| PXMP4    | 1.168758 | 1.070757 | 1.275729 | 0.000483 |
| CHMP4B   | 0.930661 | 0.850418 | 1.018474 | 0.118275 |
| BPI      | 0.984548 | 0.957774 | 1.012071 | 0.268294 |
| CST3     | 0.988709 | 0.950365 | 1.0286   | 0.573651 |
| ASIP     | 0.941193 | 0.851304 | 1.040574 | 0.236657 |
| ACTR5    | 1.055109 | 0.973367 | 1.143715 | 0.192282 |
| AHCY     | 0.928617 | 0.854722 | 1.008901 | 0.080032 |
| PPP1R16B | 0.962122 | 0.925518 | 1.000173 | 0.051029 |
| FAM83D   | 1.081221 | 1.013977 | 1.152925 | 0.017142 |

|          |          |          |          |          |
|----------|----------|----------|----------|----------|
| DHX35    | 1.029713 | 0.951822 | 1.113978 | 0.465637 |
| DNTTIP1  | 0.962446 | 0.859981 | 1.077119 | 0.505114 |
| MAP1LC3/ | 0.948228 | 0.900245 | 0.998767 | 0.044801 |
| PIGU     | 1.067769 | 0.990734 | 1.150793 | 0.086108 |
| TNNC2    | 1.114069 | 1.025927 | 1.209785 | 0.01021  |
| ACOT8    | 1.196096 | 1.057943 | 1.352289 | 0.004244 |
| ZNF516   | 0.946758 | 0.899629 | 0.996355 | 0.035717 |
| ADNP2    | 0.935115 | 0.876077 | 0.998132 | 0.043783 |
| USP14    | 0.944497 | 0.8749   | 1.019629 | 0.143687 |
| VAPA     | 0.963656 | 0.876128 | 1.059929 | 0.446065 |
| METTL4   | 1.155769 | 1.046502 | 1.276444 | 0.004277 |
| LPIN2    | 1.009546 | 0.94474  | 1.078798 | 0.778965 |
| SMCHD1   | 0.943128 | 0.891914 | 0.997283 | 0.039835 |
| MYOM1    | 1.105408 | 1.025797 | 1.191198 | 0.008593 |
| MYL12A   | 1.077125 | 0.974118 | 1.191023 | 0.147432 |
| CEP76    | 1.033101 | 0.938116 | 1.137704 | 0.508111 |
| CEP192   | 1.03076  | 0.972713 | 1.09227  | 0.305624 |
| RNMT     | 0.972019 | 0.905182 | 1.043792 | 0.434924 |
| SMAD7    | 1.045124 | 0.998407 | 1.094027 | 0.058542 |
| RNF125   | 1.014005 | 0.951665 | 1.080428 | 0.667476 |
| ANKRD12  | 0.970466 | 0.900704 | 1.045632 | 0.430916 |
| POLI     | 1.100532 | 1.012519 | 1.196195 | 0.02429  |
| MIB1     | 0.95829  | 0.901509 | 1.018648 | 0.171592 |
| RBBP8    | 0.970305 | 0.891181 | 1.056455 | 0.487327 |
| RIOK3    | 0.92131  | 0.858325 | 0.988916 | 0.023302 |
| CSTF2    | 1.223476 | 1.110078 | 1.348457 | 4.82E-05 |
| VSIG1    | 1.078163 | 0.923927 | 1.258147 | 0.339347 |
| PSMD10   | 1.108259 | 1.009975 | 1.216108 | 0.030049 |
| ATG4A    | 1.026418 | 0.945134 | 1.114693 | 0.535621 |
| STS      | 1.045332 | 0.963977 | 1.133554 | 0.283508 |
| TBL1X    | 0.918156 | 0.860478 | 0.9797   | 0.009894 |
| GPR143   | 0.936744 | 0.82635  | 1.061887 | 0.307072 |
| PGRMC1   | 1.236507 | 1.134382 | 1.347826 | 1.39E-06 |
| POLA1    | 1.055944 | 0.983069 | 1.134222 | 0.135714 |
| MID1     | 1.203604 | 1.108599 | 1.306752 | 9.99E-06 |
| NKAP     | 1.048736 | 0.94699  | 1.161415 | 0.360767 |
| RHOXF1   | 1.242343 | 1.111914 | 1.388072 | 0.000126 |
| NXT2     | 1.168637 | 1.090332 | 1.252566 | 1.06E-05 |
| ALG13    | 0.927622 | 0.851873 | 1.010106 | 0.083879 |
| PRPS2    | 1.054067 | 0.975518 | 1.138941 | 0.182647 |
| TLR8     | 1.038099 | 0.990264 | 1.088243 | 0.120307 |
| MOSPD1   | 1.124377 | 1.038708 | 1.217112 | 0.003741 |
| AMMECR1  | 1.075683 | 1.011546 | 1.143887 | 0.02002  |
| CHRD1    | 1.108321 | 1.040668 | 1.180371 | 0.001372 |
| WDR13    | 0.965112 | 0.86403  | 1.07802  | 0.529292 |
| SUV39H1  | 1.00528  | 0.910547 | 1.109868 | 0.916953 |
| SRPX     | 1.17561  | 1.024515 | 1.348989 | 0.021166 |
| XIAP     | 0.957293 | 0.886957 | 1.033207 | 0.262307 |
| STAG2    | 0.943002 | 0.879946 | 1.010577 | 0.096514 |
| ATP11C   | 1.019157 | 0.944311 | 1.099935 | 0.625839 |
| MCF2     | 0.886354 | 0.756586 | 1.038379 | 0.135262 |
| ABCD1    | 1.016305 | 0.945664 | 1.092222 | 0.659928 |
| CCDC22   | 1.021687 | 0.929441 | 1.123089 | 0.656759 |
| CACNA1F  | 1.241465 | 1.128565 | 1.365659 | 8.74E-06 |
| SYP      | 1.26003  | 1.09447  | 1.450633 | 0.0013   |
| PLP2     | 0.967198 | 0.9043   | 1.034471 | 0.33098  |
| BMX      | 1.057129 | 0.996684 | 1.121239 | 0.0644   |
| PLS3     | 1.255464 | 1.17368  | 1.342946 | 3.60E-11 |

|          |          |          |          |          |
|----------|----------|----------|----------|----------|
| RENBP    | 0.929572 | 0.858799 | 1.006178 | 0.07068  |
| ELF4     | 0.988399 | 0.916319 | 1.066149 | 0.762626 |
| SMARCA1  | 0.975436 | 0.912538 | 1.042669 | 0.464588 |
| MTMR8    | 1.086129 | 1.016178 | 1.160895 | 0.014997 |
| ASB9     | 1.102582 | 1.03145  | 1.17862  | 0.004105 |
| ZC3H12B  | 1.088496 | 0.978046 | 1.21142  | 0.120345 |
| RBBP7    | 1.008299 | 0.906963 | 1.120958 | 0.878448 |
| KCND1    | 0.94021  | 0.865677 | 1.02116  | 0.143451 |
| SLC25A14 | 1.246531 | 1.114029 | 1.394793 | 0.000121 |
| FMR1     | 0.961733 | 0.896461 | 1.031758 | 0.276554 |
| PIM2     | 1.054293 | 0.982728 | 1.131069 | 0.140435 |
| SCML2    | 0.869439 | 0.823838 | 0.917564 | 3.58E-07 |
| SLC35A2  | 0.988622 | 0.914786 | 1.068419 | 0.772636 |
| PQBP1    | 0.97948  | 0.860239 | 1.11525  | 0.754247 |
| PCSK1N   | 0.994104 | 0.90207  | 1.095528 | 0.905037 |
| EMD      | 0.945158 | 0.849284 | 1.051855 | 0.301341 |
| TAZ      | 1.000303 | 0.906907 | 1.103317 | 0.995165 |
| PGK1     | 0.973598 | 0.87578  | 1.082343 | 0.620408 |
| GATA1    | 1.01156  | 0.973854 | 1.050725 | 0.553173 |
| MAGT1    | 0.944682 | 0.868414 | 1.027648 | 0.185179 |
| SMS      | 0.927231 | 0.841885 | 1.021229 | 0.125136 |
| PHEX     | 1.122552 | 0.972234 | 1.296112 | 0.11501  |
| UBL4A    | 1.053108 | 0.966856 | 1.147055 | 0.23528  |
| CD99L2   | 1.055186 | 0.977605 | 1.138923 | 0.167998 |
| EEA1     | 1.054354 | 0.978497 | 1.136091 | 0.164726 |
| RP2      | 0.945215 | 0.877277 | 1.018415 | 0.138743 |
| USP11    | 1.069404 | 0.985716 | 1.160198 | 0.106542 |
| PCYT1B   | 1.19429  | 1.12185  | 1.271408 | 2.68E-08 |
| HTATSF1  | 1.018885 | 0.922042 | 1.1259   | 0.713501 |
| CD40LG   | 1.035098 | 0.96515  | 1.110116 | 0.333884 |
| TIMP1    | 0.992982 | 0.943867 | 1.044652 | 0.785519 |
| GABRE    | 1.022225 | 0.971364 | 1.07575  | 0.398563 |
| FGD1     | 1.033505 | 0.897415 | 1.190232 | 0.64733  |
| PIN4     | 1.126579 | 1.002103 | 1.266517 | 0.046029 |
| PORCN    | 1.136184 | 1.015707 | 1.270952 | 0.025584 |
| MAGED2   | 1.016725 | 0.947125 | 1.091439 | 0.646633 |
| RBM3     | 0.886293 | 0.813278 | 0.965863 | 0.005927 |
| KLF8     | 1.257497 | 1.136385 | 1.391516 | 9.23E-06 |
| SYTL4    | 1.186713 | 1.118441 | 1.259153 | 1.49E-08 |
| ZDHHC15  | 1.31671  | 1.178854 | 1.470687 | 1.08E-06 |
| CENPI    | 1.085671 | 1.010202 | 1.166777 | 0.025346 |
| GLA      | 0.908496 | 0.825873 | 0.999384 | 0.048538 |
| ARMCX3   | 0.969844 | 0.917144 | 1.025572 | 0.282742 |
| BEX4     | 1.031087 | 0.980334 | 1.084469 | 0.234551 |
| NDFIP2   | 0.958963 | 0.896613 | 1.025648 | 0.221842 |
| TNFSF13B | 1.025125 | 0.976117 | 1.076594 | 0.320792 |
| FNDC3A   | 0.913698 | 0.856002 | 0.975284 | 0.006688 |
| MLNR     | 0.912186 | 0.85235  | 0.976223 | 0.007928 |
| CDADC1   | 0.993091 | 0.920426 | 1.071493 | 0.858072 |
| CAB39L   | 1.005661 | 0.898054 | 1.126161 | 0.922119 |
| KLF5     | 1.104348 | 1.053537 | 1.15761  | 3.63E-05 |
| STK24    | 0.848624 | 0.789725 | 0.911914 | 7.73E-06 |
| ACP5     | 1.008444 | 0.941425 | 1.080235 | 0.810594 |
| DNAJC3   | 0.98873  | 0.924171 | 1.0578   | 0.742181 |
| ARHGEF7  | 0.946545 | 0.892348 | 1.004035 | 0.067833 |
| FGF9     | 1.18419  | 1.06638  | 1.315015 | 0.001567 |
| PARP4    | 0.974513 | 0.916506 | 1.036192 | 0.409637 |
| MRPS31   | 1.057105 | 0.954563 | 1.170661 | 0.286094 |



|          |          |          |          |          |
|----------|----------|----------|----------|----------|
| SLC25A15 | 1.086562 | 1.009698 | 1.169277 | 0.026569 |
| KPNA3    | 0.930443 | 0.857701 | 1.009354 | 0.082601 |
| FLT1     | 1.119207 | 0.996498 | 1.257026 | 0.057333 |
| DGKH     | 1.20446  | 1.122194 | 1.292756 | 2.55E-07 |
| KATNAL1  | 0.93225  | 0.86038  | 1.010123 | 0.086549 |
| INTS6    | 1.007244 | 0.940347 | 1.078899 | 0.836917 |
| DHRS12   | 0.965798 | 0.905175 | 1.030481 | 0.292722 |
| TSC22D1  | 0.948663 | 0.892719 | 1.008113 | 0.08924  |
| CLN5     | 1.032583 | 0.95392  | 1.117732 | 0.427727 |
| OLFM4    | 1.041336 | 1.008689 | 1.07504  | 0.012692 |
| MSLN     | 0.945345 | 0.920671 | 0.97068  | 3.11E-05 |
| MGRN1    | 0.846236 | 0.779524 | 0.918657 | 6.75E-05 |
| ZNF629   | 0.945373 | 0.882346 | 1.012903 | 0.11054  |
| TRADD    | 1.126451 | 1.043289 | 1.216241 | 0.002343 |
| HSF4     | 1.14946  | 1.054797 | 1.252618 | 0.00149  |
| CORO1A   | 0.935141 | 0.873419 | 1.001225 | 0.054252 |
| MAPK3    | 1.041465 | 0.937292 | 1.157215 | 0.449899 |
| GDPD3    | 1.100211 | 1.013904 | 1.193865 | 0.021949 |
| ELMO3    | 1.186774 | 1.093018 | 1.288571 | 4.54E-05 |
| PHKB     | 1.021595 | 0.949377 | 1.099307 | 0.567878 |
| LYRM1    | 0.990124 | 0.890037 | 1.101467 | 0.855166 |
| NUTF2    | 0.994854 | 0.900791 | 1.098739 | 0.918909 |
| NUP93    | 1.022601 | 0.930087 | 1.124317 | 0.644129 |
| CENPT    | 1.219391 | 1.112916 | 1.336053 | 2.09E-05 |
| TSNAXIP1 | 1.25072  | 1.074151 | 1.456314 | 0.003962 |
| NFAT5    | 0.896839 | 0.847274 | 0.949303 | 0.000174 |
| LONP2    | 1.035694 | 0.962091 | 1.114927 | 0.351095 |
| N4BP1    | 0.980329 | 0.907005 | 1.05958  | 0.61645  |
| ARL2BP   | 1.344987 | 1.164736 | 1.553133 | 5.41E-05 |
| PLLP     | 1.445114 | 1.237089 | 1.688119 | 3.44E-06 |
| CCL22    | 1.252067 | 1.14385  | 1.370521 | 1.09E-06 |
| DHODH    | 1.079355 | 0.994038 | 1.171994 | 0.06912  |
| CCL17    | 1.088725 | 0.927852 | 1.27749  | 0.297398 |
| CTCF     | 1.060244 | 0.958458 | 1.172839 | 0.255954 |
| ACD      | 1.127026 | 1.005011 | 1.263855 | 0.04081  |
| POLR2C   | 1.030466 | 0.925361 | 1.147509 | 0.584554 |
| PARD6A   | 1.152822 | 1.032546 | 1.287109 | 0.011417 |
| ZNF821   | 0.931305 | 0.851441 | 1.018661 | 0.119759 |
| MMP15    | 1.119998 | 1.061402 | 1.181829 | 3.57E-05 |
| CYB5B    | 1.066823 | 0.977347 | 1.16449  | 0.147818 |
| NME3     | 1.073816 | 0.988809 | 1.166131 | 0.09055  |
| NDRG4    | 1.059866 | 0.953677 | 1.177878 | 0.2804   |
| PSMD7    | 1.120426 | 0.992165 | 1.265269 | 0.06678  |
| SETD6    | 1.040872 | 0.943293 | 1.148545 | 0.425097 |
| SLC38A7  | 1.264593 | 1.134872 | 1.409142 | 2.13E-05 |
| VAC14    | 0.977543 | 0.898392 | 1.063667 | 0.598029 |
| HAS3     | 0.999388 | 0.883652 | 1.130283 | 0.992224 |
| COG4     | 1.07638  | 0.997742 | 1.161216 | 0.05723  |
| SMPD3    | 1.185423 | 1.093054 | 1.285597 | 3.96E-05 |
| SLC7A6OS | 1.035573 | 0.949426 | 1.129536 | 0.43022  |
| SLC7A6   | 1.077193 | 0.999966 | 1.160383 | 0.050104 |
| PLA2G15  | 1.076841 | 0.98814  | 1.173505 | 0.091423 |
| ESRP2    | 1.007825 | 0.940939 | 1.079465 | 0.823957 |
| WDR59    | 0.990669 | 0.915472 | 1.072041 | 0.815936 |
| MON1B    | 0.964631 | 0.882593 | 1.054294 | 0.427155 |
| AXIN1    | 1.015557 | 0.935157 | 1.10287  | 0.713738 |
| HCFC1R1  | 0.886248 | 0.810719 | 0.968813 | 0.007881 |
| MLYCD    | 1.027546 | 0.957724 | 1.102459 | 0.449135 |

|          |          |          |          |          |
|----------|----------|----------|----------|----------|
| MPG      | 0.930858 | 0.854244 | 1.014344 | 0.102054 |
| HSDL1    | 0.953276 | 0.882347 | 1.029906 | 0.225136 |
| TAF1C    | 1.030402 | 0.950969 | 1.11647  | 0.464348 |
| NAGPA    | 1.072601 | 0.990971 | 1.160955 | 0.082672 |
| WFDC1    | 0.777752 | 0.700475 | 0.863554 | 2.51E-06 |
| COTL1    | 0.955393 | 0.901921 | 1.012035 | 0.120458 |
| USP10    | 0.921239 | 0.850746 | 0.997575 | 0.043409 |
| CRISPLD2 | 0.92707  | 0.877274 | 0.979693 | 0.007182 |
| TSC2     | 0.965067 | 0.881165 | 1.056959 | 0.443536 |
| ZNF500   | 1.122055 | 1.028318 | 1.224335 | 0.009672 |
| NME4     | 0.872513 | 0.801226 | 0.950144 | 0.001713 |
| ABCC1    | 0.982918 | 0.927497 | 1.04165  | 0.560645 |
| NOMO3    | 1.019124 | 0.928275 | 1.118865 | 0.690888 |
| LMF1     | 1.057914 | 0.96063  | 1.16505  | 0.252675 |
| FOXF1    | 0.993049 | 0.880754 | 1.119662 | 0.909299 |
| MTHFSD   | 1.069884 | 0.98226  | 1.165325 | 0.121284 |
| CLCN7    | 0.952394 | 0.890471 | 1.018623 | 0.155015 |
| HAGHL    | 0.823557 | 0.766225 | 0.885179 | 1.34E-07 |
| SLC7A5   | 1.0156   | 0.963801 | 1.070183 | 0.562224 |
| METRN    | 0.876853 | 0.815019 | 0.943378 | 0.000428 |
| FBXO31   | 0.932401 | 0.859744 | 1.011199 | 0.090852 |
| STUB1    | 0.956442 | 0.864954 | 1.057608 | 0.385318 |
| RHBDL1   | 1.067659 | 0.98611  | 1.155951 | 0.106323 |
| NUBP1    | 0.874562 | 0.790713 | 0.967302 | 0.009149 |
| UBE2I    | 0.984894 | 0.89092  | 1.08878  | 0.766086 |
| MEFV     | 1.040484 | 0.998012 | 1.084765 | 0.061991 |
| CRYM     | 1.254698 | 1.165971 | 1.350177 | 1.33E-09 |
| EEF2K    | 0.997737 | 0.934266 | 1.06552  | 0.946139 |
| GSPT1    | 1.049725 | 0.966664 | 1.139923 | 0.24857  |
| ZNF174   | 1.096751 | 0.991264 | 1.213463 | 0.07347  |
| CLUAP1   | 1.080448 | 0.98181  | 1.188996 | 0.113164 |
| UBFD1    | 0.985267 | 0.916357 | 1.059358 | 0.688252 |
| PRSS33   | 0.770714 | 0.689472 | 0.86153  | 4.60E-06 |
| EARS2    | 1.094304 | 1.014006 | 1.180961 | 0.020467 |
| GGA2     | 0.993753 | 0.931642 | 1.060005 | 0.849073 |
| AQP8     | 0.928181 | 0.837937 | 1.028144 | 0.153258 |
| CPPED1   | 0.997918 | 0.936103 | 1.063814 | 0.949054 |
| USP31    | 1.246103 | 1.157772 | 1.341174 | 4.49E-09 |
| HMOX2    | 1.043209 | 0.949841 | 1.145754 | 0.376562 |
| DNAJA3   | 1.154812 | 1.059352 | 1.258874 | 0.001077 |
| BFAR     | 0.996608 | 0.891363 | 1.114279 | 0.952417 |
| RRN3P2   | 1.009526 | 0.913379 | 1.115795 | 0.852705 |
| RBL2     | 1.010743 | 0.942675 | 1.083725 | 0.763879 |
| QPRT     | 0.941439 | 0.884647 | 1.001877 | 0.057317 |
| XYLT1    | 1.09157  | 1.033058 | 1.153396 | 0.001827 |
| PYCARD   | 1.089796 | 1.017938 | 1.166727 | 0.01348  |
| RPGRIP1L | 1.119082 | 0.975318 | 1.284037 | 0.108774 |
| MAZ      | 0.926678 | 0.856078 | 1.0031   | 0.059646 |
| STX4     | 0.970148 | 0.872209 | 1.079084 | 0.576724 |
| CDIPT    | 1.199289 | 1.090143 | 1.319363 | 0.000189 |
| BCKDK    | 1.237617 | 1.123438 | 1.3634   | 1.58E-05 |
| NOMO1    | 1.035192 | 0.956651 | 1.120181 | 0.390268 |
| IL21R    | 1.030713 | 0.970887 | 1.094226 | 0.321422 |
| SYT17    | 1.095083 | 1.004963 | 1.193284 | 0.038177 |
| TMC5     | 1.167947 | 1.062771 | 1.283532 | 0.001262 |
| RNF40    | 0.913547 | 0.850444 | 0.981332 | 0.013287 |
| AQP9     | 1.010155 | 0.973161 | 1.048554 | 0.595576 |
| AAGAB    | 1.106317 | 1.007244 | 1.215134 | 0.034793 |

|          |          |          |          |          |
|----------|----------|----------|----------|----------|
| IQCH     | 1.203658 | 1.03178  | 1.404168 | 0.018377 |
| LACTB    | 0.973264 | 0.897453 | 1.055479 | 0.512478 |
| CORO2B   | 0.857351 | 0.778514 | 0.944172 | 0.001765 |
| CSK      | 0.989912 | 0.906912 | 1.080507 | 0.820472 |
| HERC1    | 0.993457 | 0.945018 | 1.044378 | 0.796863 |
| TRIP4    | 1.053612 | 0.946836 | 1.172429 | 0.338099 |
| MTFMT    | 1.201228 | 1.079567 | 1.336599 | 0.000765 |
| ACSBG1   | 1.049003 | 0.915628 | 1.201807 | 0.49049  |
| IGDCC4   | 0.869464 | 0.767185 | 0.985379 | 0.028478 |
| RAB11A   | 1.075406 | 0.962101 | 1.202054 | 0.200614 |
| CTSH     | 1.090897 | 1.022118 | 1.164305 | 0.008835 |
| TTC23    | 1.013923 | 0.921606 | 1.115487 | 0.776505 |
| CD276    | 1.059923 | 1.002387 | 1.120762 | 0.040983 |
| FAH      | 1.024892 | 0.939054 | 1.118577 | 0.581678 |
| RPAP1    | 1.06307  | 0.980679 | 1.152383 | 0.137289 |
| HOMER2   | 0.885036 | 0.827924 | 0.946088 | 0.000333 |
| EHD4     | 1.133351 | 1.063167 | 1.20817  | 0.000124 |
| TMEM87A  | 0.939597 | 0.8741   | 1.010001 | 0.091024 |
| CEP152   | 1.053193 | 0.977193 | 1.135103 | 0.175026 |
| ATP8B4   | 0.998889 | 0.960635 | 1.038668 | 0.955524 |
| DTWD1    | 1.046834 | 0.947597 | 1.156464 | 0.367742 |
| TGM5     | 1.032918 | 0.978327 | 1.090555 | 0.242382 |
| FAM189A1 | 1.163059 | 1.072134 | 1.261696 | 0.000276 |
| GABPB1   | 0.956792 | 0.889661 | 1.028989 | 0.234036 |
| BMF      | 0.946769 | 0.89871  | 0.997399 | 0.039595 |
| DMXL2    | 0.994407 | 0.95233  | 1.038344 | 0.799314 |
| SCG3     | 1.030707 | 0.924089 | 1.149627 | 0.587206 |
| DNAJC17  | 1.132536 | 1.026143 | 1.24996  | 0.01341  |
| EIF3J    | 0.877089 | 0.796114 | 0.9663   | 0.007964 |
| SPG11    | 0.993193 | 0.930116 | 1.060549 | 0.838342 |
| RHOV     | 1.037714 | 0.930883 | 1.156804 | 0.504221 |
| VPS18    | 0.951713 | 0.879141 | 1.030275 | 0.221347 |
| OIP5     | 1.087068 | 0.985787 | 1.198756 | 0.094312 |
| SLC30A4  | 1.175047 | 1.083051 | 1.274857 | 0.000105 |
| MYEF2    | 0.97824  | 0.926108 | 1.033307 | 0.431067 |
| SGK3     | 0.97195  | 0.888609 | 1.063108 | 0.533929 |
| CSPP1    | 0.977015 | 0.906547 | 1.05296  | 0.542646 |
| ZDHHC2   | 0.93694  | 0.882915 | 0.994271 | 0.031589 |
| BRF2     | 1.036164 | 0.936411 | 1.146543 | 0.49155  |
| TRIM35   | 1.185551 | 1.100269 | 1.277443 | 7.87E-06 |
| ZFAND1   | 0.937441 | 0.854919 | 1.027928 | 0.169416 |
| CA2      | 1.022096 | 0.984911 | 1.060684 | 0.247738 |
| FZD3     | 1.203588 | 1.101571 | 1.315054 | 4.12E-05 |
| INTS9    | 1.046291 | 0.955906 | 1.145221 | 0.326259 |
| RIPK2    | 0.863117 | 0.806947 | 0.923198 | 1.81E-05 |
| NBN      | 0.957605 | 0.893083 | 1.026788 | 0.223535 |
| DECR1    | 1.183151 | 1.085671 | 1.289384 | 0.000126 |
| SFRP1    | 1.133864 | 0.964591 | 1.332843 | 0.127775 |
| LAPTM4B  | 1.113563 | 1.072537 | 1.156158 | 1.95E-08 |
| UBE2W    | 1.004456 | 0.933448 | 1.080866 | 0.905389 |
| POP1     | 1.241161 | 1.138784 | 1.352742 | 8.71E-07 |
| NIPAL2   | 1.106869 | 1.039858 | 1.178198 | 0.00144  |
| IKBKB    | 1.016594 | 0.949529 | 1.088395 | 0.63647  |
| PLAT     | 0.914146 | 0.781557 | 1.069228 | 0.261548 |
| DKK4     | 0.993561 | 0.893302 | 1.105073 | 0.905254 |
| STK3     | 1.060478 | 0.962212 | 1.168779 | 0.236592 |
| GDAP1    | 1.466124 | 1.269797 | 1.692806 | 1.83E-07 |
| RAB2A    | 0.960271 | 0.865501 | 1.065417 | 0.444452 |

|          |          |          |          |          |
|----------|----------|----------|----------|----------|
| EIF3E    | 0.894434 | 0.817261 | 0.978893 | 0.015378 |
| NDRG1    | 0.922376 | 0.867751 | 0.98044  | 0.009483 |
| IL7      | 1.209015 | 1.114138 | 1.311971 | 5.31E-06 |
| ARMC1    | 1.067074 | 0.977647 | 1.164682 | 0.146017 |
| TRPS1    | 1.086435 | 1.041091 | 1.133755 | 0.000138 |
| SPAG1    | 1.19843  | 1.105947 | 1.298647 | 9.98E-06 |
| CHRACT   | 1.003476 | 0.903471 | 1.114549 | 0.948353 |
| NCALD    | 0.952701 | 0.8802   | 1.031174 | 0.230205 |
| SNX16    | 0.96405  | 0.887126 | 1.047645 | 0.388181 |
| UBR5     | 0.952925 | 0.900361 | 1.008557 | 0.095788 |
| GSDMD    | 1.002829 | 0.932181 | 1.078831 | 0.939587 |
| EEF1D    | 1.014045 | 0.915198 | 1.123567 | 0.789834 |
| SQLE     | 1.215758 | 1.125325 | 1.313458 | 7.27E-07 |
| SH2D4A   | 0.975217 | 0.875997 | 1.085676 | 0.646666 |
| INTS10   | 1.090988 | 0.994222 | 1.197173 | 0.06611  |
| ERI1     | 1.034398 | 0.95019  | 1.12607  | 0.435021 |
| SLC39A14 | 1.211342 | 1.133902 | 1.294071 | 1.28E-08 |
| MTMR9    | 1.226567 | 1.125978 | 1.336142 | 2.90E-06 |
| LEPROTL1 | 0.955467 | 0.873684 | 1.044905 | 0.318367 |
| DCTN6    | 0.950727 | 0.864435 | 1.045633 | 0.297962 |
| R3HCC1   | 1.159007 | 1.043759 | 1.286979 | 0.005755 |
| GSR      | 1.028599 | 0.957578 | 1.104887 | 0.439835 |
| TNFRSF10 | 0.919287 | 0.864062 | 0.97804  | 0.007758 |
| UBXN8    | 1.213785 | 1.102135 | 1.336746 | 8.31E-05 |
| PPP2CB   | 0.96253  | 0.877892 | 1.055327 | 0.416083 |
| ERICH1   | 1.000248 | 0.906554 | 1.103626 | 0.996051 |
| TUSC3    | 1.214607 | 1.109375 | 1.329822 | 2.61E-05 |
| KLHDC4   | 1.042918 | 0.959476 | 1.133617 | 0.323313 |
| MCM4     | 1.106535 | 1.037589 | 1.180063 | 0.002042 |
| KCTD9    | 0.977811 | 0.907876 | 1.053132 | 0.553411 |
| ASAH1    | 0.95195  | 0.875663 | 1.034883 | 0.247915 |
| BNIP3L   | 0.976213 | 0.913442 | 1.043298 | 0.477729 |
| MAN2B1   | 0.920164 | 0.848343 | 0.998065 | 0.044785 |
| KCNN4    | 0.963202 | 0.899611 | 1.031287 | 0.281974 |
| TULP2    | 1.014277 | 0.965179 | 1.065873 | 0.575497 |
| NUCB1    | 1.051716 | 0.954948 | 1.15829  | 0.305886 |
| DHDH     | 0.994368 | 0.917349 | 1.077853 | 0.890778 |
| GYS1     | 0.988387 | 0.914    | 1.068828 | 0.769828 |
| MAP4K1   | 1.145043 | 1.053764 | 1.244227 | 0.001396 |
| ECH1     | 1.166511 | 1.063481 | 1.279521 | 0.001096 |
| HNRNPL   | 0.930488 | 0.846148 | 1.023234 | 0.137233 |
| NFKBIB   | 0.877469 | 0.804955 | 0.956516 | 0.002976 |
| LHB      | 0.971497 | 0.885501 | 1.065846 | 0.540881 |
| SARS2    | 1.156138 | 1.025967 | 1.302824 | 0.017284 |
| SNRNP70  | 1.037993 | 0.952753 | 1.130859 | 0.393705 |
| CLPTM1   | 0.951858 | 0.86233  | 1.05068  | 0.327577 |
| RELB     | 0.925721 | 0.873293 | 0.981297 | 0.009468 |
| LIN7B    | 1.285838 | 1.14395  | 1.445325 | 2.50E-05 |
| FCGRT    | 0.980243 | 0.927746 | 1.03571  | 0.477348 |
| PIH1D1   | 1.193339 | 1.072572 | 1.327705 | 0.001167 |
| CKM      | 1.000433 | 0.927283 | 1.079354 | 0.99108  |
| ARHGEF1E | 0.986792 | 0.917941 | 1.060808 | 0.718624 |
| PPP1R13L | 1.344474 | 1.2072   | 1.497357 | 7.17E-08 |
| PEX11G   | 0.986762 | 0.925971 | 1.051544 | 0.681236 |
| ERCC2    | 1.238034 | 1.133404 | 1.352324 | 2.14E-06 |
| DOT1L    | 0.987817 | 0.908545 | 1.074004 | 0.773952 |
| PLEKHJ1  | 1.316757 | 1.1852   | 1.462917 | 3.00E-07 |
| KLC3     | 1.167161 | 1.047838 | 1.300073 | 0.004966 |

|         |          |          |          |          |
|---------|----------|----------|----------|----------|
| CD37    | 1.10714  | 1.0135   | 1.209432 | 0.023985 |
| SF3A2   | 0.880744 | 0.808635 | 0.959285 | 0.003571 |
| AMH     | 1.118833 | 1.044639 | 1.198296 | 0.001339 |
| LYL1    | 0.860967 | 0.7978   | 0.929136 | 0.000118 |
| OAZ1    | 1.069991 | 0.94997  | 1.205176 | 0.265086 |
| TRMT1   | 1.03466  | 0.945649 | 1.132049 | 0.457857 |
| STX10   | 0.962053 | 0.860505 | 1.075586 | 0.496691 |
| RETN    | 0.984471 | 0.952708 | 1.017293 | 0.349608 |
| FCER2   | 0.965    | 0.917401 | 1.015069 | 0.16745  |
| DMPK    | 1.022149 | 0.938827 | 1.112867 | 0.613586 |
| TBC1D17 | 1.054041 | 0.963134 | 1.153529 | 0.252746 |
| IL4I1   | 1.162285 | 1.100939 | 1.227049 | 5.45E-08 |
| CCDC130 | 1.037595 | 0.929526 | 1.158228 | 0.510759 |
| PTOV1   | 0.963291 | 0.876714 | 1.058418 | 0.436361 |
| SGTA    | 0.802008 | 0.734477 | 0.875748 | 8.82E-07 |
| KIR3DX1 | 1.170942 | 1.073517 | 1.277208 | 0.00037  |
| LILRB1  | 1.064436 | 1.012302 | 1.119256 | 0.014802 |
| MED25   | 0.945634 | 0.857424 | 1.042919 | 0.263204 |
| LILRA1  | 1.068022 | 1.020666 | 1.117575 | 0.004456 |
| SNAPC2  | 0.87631  | 0.790988 | 0.970835 | 0.011527 |
| TIMM44  | 1.03258  | 0.945485 | 1.127697 | 0.475779 |
| CCDC61  | 1.102569 | 1.028045 | 1.182496 | 0.006246 |
| IL27RA  | 0.980251 | 0.912873 | 1.052602 | 0.583012 |
| ASF1B   | 1.165614 | 1.091468 | 1.244796 | 4.88E-06 |
| TNNT1   | 1.210014 | 1.154195 | 1.268531 | 2.55E-15 |
| VRK3    | 1.030876 | 0.932341 | 1.139825 | 0.553019 |
| FAM32A  | 1.139178 | 1.027581 | 1.262894 | 0.013242 |
| MED26   | 0.94582  | 0.88102  | 1.015386 | 0.123975 |
| OLFM2   | 1.017769 | 0.921323 | 1.124311 | 0.728784 |
| RASAL3  | 1.019481 | 0.943196 | 1.101937 | 0.626812 |
| AKAP8   | 1.021971 | 0.939847 | 1.11127  | 0.611119 |
| ILVBL   | 1.086887 | 0.990739 | 1.192365 | 0.077887 |
| ZNF419  | 1.059131 | 0.969427 | 1.157134 | 0.203265 |
| SYDE1   | 0.968871 | 0.871226 | 1.07746  | 0.559582 |
| AURKC   | 0.956629 | 0.873234 | 1.047988 | 0.340708 |
| POP4    | 1.317857 | 1.160019 | 1.497171 | 2.23E-05 |
| CCNE1   | 1.114173 | 1.029186 | 1.206179 | 0.007572 |
| PDCD5   | 1.016145 | 0.926055 | 1.115    | 0.735263 |
| ANKRD27 | 0.988845 | 0.931568 | 1.049645 | 0.712532 |
| RPS16   | 0.901285 | 0.828364 | 0.980626 | 0.015759 |
| TIMM50  | 1.027192 | 0.927547 | 1.137542 | 0.606323 |
| FBL     | 0.925662 | 0.847257 | 1.011323 | 0.08715  |
| DYRK1B  | 0.874617 | 0.803368 | 0.952185 | 0.002001 |
| CLC     | 0.94134  | 0.917887 | 0.965393 | 2.65E-06 |
| GPI     | 0.829463 | 0.767817 | 0.896059 | 2.08E-06 |
| AKT2    | 0.981759 | 0.909549 | 1.059702 | 0.636721 |
| PLD3    | 0.992413 | 0.944454 | 1.042807 | 0.763136 |
| PRX     | 0.918313 | 0.856903 | 0.984124 | 0.015816 |
| PIAS4   | 0.987727 | 0.906326 | 1.076439 | 0.778398 |
| NUMBL   | 1.079677 | 0.99282  | 1.174133 | 0.073202 |
| EBI3    | 0.883951 | 0.816488 | 0.956988 | 0.002324 |
| SHD     | 0.90992  | 0.862606 | 0.959829 | 0.000531 |
| TBCB    | 1.171179 | 1.060444 | 1.293478 | 0.00182  |
| FSD1    | 1.057663 | 0.928105 | 1.205305 | 0.400419 |
| POLR2I  | 1.222788 | 1.137019 | 1.315027 | 5.94E-08 |
| CLIP3   | 0.88623  | 0.841807 | 0.932998 | 4.16E-06 |
| SLC1A5  | 1.121445 | 1.058168 | 1.188507 | 0.00011  |
| PRKD2   | 1.043616 | 0.965018 | 1.128616 | 0.285236 |

|         |          |          |          |          |
|---------|----------|----------|----------|----------|
| TJP3    | 1.155631 | 0.994882 | 1.342352 | 0.058382 |
| APLP1   | 0.96398  | 0.91878  | 1.011404 | 0.134346 |
| CCDC9   | 0.845925 | 0.775449 | 0.922806 | 0.000163 |
| HNRNPUL | 0.941504 | 0.84607  | 1.047702 | 0.268988 |
| FZR1    | 0.98298  | 0.913927 | 1.05725  | 0.644128 |
| BBC3    | 0.940399 | 0.881493 | 1.003242 | 0.062617 |
| TGFB1   | 1.00625  | 0.931514 | 1.086982 | 0.874272 |
| DENND3  | 0.983087 | 0.928013 | 1.04143  | 0.561993 |
| CEACAM4 | 0.978878 | 0.939164 | 1.02027  | 0.312354 |
| MRPL4   | 1.010123 | 0.913207 | 1.117324 | 0.844831 |
| SIGLEC8 | 1.039354 | 0.92705  | 1.165264 | 0.508218 |
| CD79A   | 0.999894 | 0.951994 | 1.050205 | 0.996631 |
| RPS19   | 0.928115 | 0.852713 | 1.010184 | 0.084422 |
| NKG7    | 1.0632   | 1.006716 | 1.122853 | 0.027787 |
| ICAM5   | 0.893623 | 0.843842 | 0.946341 | 0.00012  |
| ETFB    | 1.468326 | 1.308114 | 1.64816  | 7.21E-11 |
| CD33    | 1.073435 | 1.011452 | 1.139217 | 0.019533 |
| TYK2    | 1.057046 | 0.978945 | 1.141377 | 0.156599 |
| CDC37   | 0.927637 | 0.825523 | 1.042382 | 0.206815 |
| NAPA    | 1.058698 | 0.957958 | 1.170032 | 0.263539 |
| RABAC1  | 1.224581 | 1.105609 | 1.356356 | 0.000102 |
| PTPRS   | 1.020449 | 0.974323 | 1.068759 | 0.391041 |
| CNFN    | 1.254529 | 1.165896 | 1.3499   | 1.31E-09 |
| MEGF8   | 1.012852 | 0.949695 | 1.080209 | 0.697461 |
| KDELRL1 | 0.970022 | 0.879299 | 1.070105 | 0.5435   |
| CYTH2   | 1.101569 | 1.002469 | 1.210465 | 0.0443   |
| GRWD1   | 1.121197 | 1.029587 | 1.220958 | 0.008528 |
| GRIN2D  | 1.219424 | 1.143705 | 1.300156 | 1.32E-09 |
| CLEC11A | 0.969532 | 0.93606  | 1.0042   | 0.084317 |
| CCDC114 | 1.230481 | 1.092522 | 1.385862 | 0.00063  |
| CARD8   | 1.051095 | 0.986777 | 1.119605 | 0.121917 |
| LIG1    | 1.122453 | 1.031514 | 1.221409 | 0.007368 |
| SIGLEC6 | 1.056902 | 1.000218 | 1.116799 | 0.049102 |
| ZNF175  | 1.120733 | 1.04244  | 1.204907 | 0.002036 |
| PLA2G4C | 1.129594 | 1.025129 | 1.244704 | 0.013846 |
| SIGLEC5 | 1.126976 | 1.014121 | 1.252389 | 0.02639  |
| HAS1    | 0.937606 | 0.886911 | 0.991199 | 0.023106 |
| RAB3D   | 1.084437 | 1.026461 | 1.145687 | 0.003833 |
| DBP     | 0.992012 | 0.911259 | 1.079922 | 0.853131 |
| TMEM205 | 1.207174 | 1.099511 | 1.325379 | 7.80E-05 |
| CAPS    | 1.082216 | 0.985974 | 1.187853 | 0.096372 |
| FAM83E  | 0.99591  | 0.897211 | 1.105466 | 0.938643 |
| RASIP1  | 1.217854 | 1.12251  | 1.321296 | 2.15E-06 |
| BCAT2   | 1.119486 | 1.030866 | 1.215724 | 0.007309 |
| MIER2   | 0.977187 | 0.895419 | 1.066422 | 0.60474  |
| PLEKHA4 | 1.218223 | 1.100584 | 1.348435 | 0.000139 |
| PPP2R1A | 0.971348 | 0.884772 | 1.066396 | 0.541645 |
| TNPO2   | 1.005533 | 0.930826 | 1.086235 | 0.888598 |
| GCDH    | 1.004191 | 0.920069 | 1.096004 | 0.925353 |
| LILRB5  | 0.991248 | 0.857687 | 1.145607 | 0.905239 |
| KLF1    | 0.994738 | 0.958749 | 1.032078 | 0.77901  |
| DNASE2  | 0.889916 | 0.835847 | 0.947483 | 0.000266 |
| MAST1   | 1.022142 | 0.920425 | 1.1351   | 0.682172 |
| LENG1   | 1.030304 | 0.923178 | 1.14986  | 0.594059 |
| PRPF31  | 1.260597 | 1.1103   | 1.43124  | 0.00035  |
| TFPT    | 1.065177 | 0.944798 | 1.200894 | 0.302104 |
| JAK3    | 0.951916 | 0.899932 | 1.006904 | 0.085462 |
| RPL18A  | 0.916289 | 0.84976  | 0.988027 | 0.023017 |

|         |          |          |          |          |
|---------|----------|----------|----------|----------|
| SLC5A5  | 0.988228 | 0.872233 | 1.11965  | 0.852535 |
| KCNN1   | 1.107664 | 1.03139  | 1.18958  | 0.004969 |
| ARRDC2  | 0.968081 | 0.894804 | 1.047358 | 0.419217 |
| RAB3A   | 1.152213 | 1.058884 | 1.253768 | 0.001011 |
| ISYNA1  | 0.91161  | 0.854131 | 0.972957 | 0.005352 |
| ELL     | 0.946137 | 0.882231 | 1.014673 | 0.120729 |
| CRTC1   | 1.026462 | 0.948962 | 1.110292 | 0.51435  |
| COPE    | 0.918627 | 0.82555  | 1.022197 | 0.119429 |
| DDX49   | 0.977558 | 0.880897 | 1.084825 | 0.669174 |
| ETV2    | 0.89943  | 0.810348 | 0.998306 | 0.046391 |
| ARMC6   | 1.101124 | 1.01834  | 1.190639 | 0.015705 |
| TMEM147 | 1.106275 | 1.017831 | 1.202404 | 0.017516 |
| HAMP    | 1.03939  | 0.939029 | 1.150478 | 0.455844 |
| USF2    | 0.986336 | 0.885392 | 1.098789 | 0.802775 |
| LSR     | 1.090084 | 1.002548 | 1.185263 | 0.043431 |
| FKBP8   | 0.927608 | 0.859745 | 1.000829 | 0.052551 |
| ZNF14   | 0.950164 | 0.897243 | 1.006206 | 0.080398 |
| SCN1B   | 0.846739 | 0.77259  | 0.928004 | 0.000374 |
| PBX4    | 0.889187 | 0.845492 | 0.93514  | 4.92E-06 |
| ERF     | 0.874818 | 0.816799 | 0.936958 | 0.000134 |
| GSK3A   | 0.949415 | 0.846536 | 1.064797 | 0.375047 |
| ATP13A1 | 1.089283 | 0.98854  | 1.200293 | 0.084136 |
| ZNF574  | 0.927807 | 0.858746 | 1.002421 | 0.057605 |
| GRIK5   | 0.857575 | 0.822332 | 0.894328 | 7.17E-13 |
| SIPA1L3 | 1.006081 | 0.939468 | 1.077419 | 0.862284 |
| ZNF85   | 1.034217 | 0.943649 | 1.133477 | 0.471811 |
| ETHE1   | 0.953192 | 0.872905 | 1.040864 | 0.285594 |
| CADM4   | 1.088236 | 0.970213 | 1.220616 | 0.148828 |
| AVL9    | 1.003372 | 0.938545 | 1.072677 | 0.921309 |
| RUNDC3B | 1.053245 | 0.937865 | 1.18282  | 0.380855 |
| GTPBP10 | 1.056165 | 0.95378  | 1.16954  | 0.293553 |
| RASA4   | 0.827114 | 0.726147 | 0.94212  | 0.004269 |
| CDK6    | 0.999511 | 0.948605 | 1.05315  | 0.985379 |
| PMPCB   | 0.980157 | 0.889321 | 1.080271 | 0.686276 |
| DNAJC2  | 0.930627 | 0.850839 | 1.017896 | 0.115926 |
| TFPI2   | 1.134295 | 1.043593 | 1.23288  | 0.003042 |
| BET1    | 1.066215 | 0.96179  | 1.181978 | 0.222786 |
| NAMPT   | 0.940748 | 0.892939 | 0.991118 | 0.02172  |
| PIK3CG  | 1.004179 | 0.946687 | 1.065163 | 0.889741 |
| PON2    | 1.031851 | 0.980638 | 1.08574  | 0.227363 |
| ITGB8   | 1.037356 | 0.953128 | 1.129026 | 0.395963 |
| HBP1    | 0.927547 | 0.870013 | 0.988886 | 0.021333 |
| DUS4L   | 1.073153 | 0.945707 | 1.217774 | 0.273717 |
| SP4     | 0.976158 | 0.907442 | 1.050077 | 0.517028 |
| WDR91   | 1.099572 | 1.027626 | 1.176556 | 0.005973 |
| DNAH11  | 0.897759 | 0.764696 | 1.053977 | 0.187608 |
| CBLL1   | 0.966761 | 0.871738 | 1.072141 | 0.521922 |
| MTPN    | 0.930409 | 0.854274 | 1.013331 | 0.097732 |
| MPP6    | 0.995983 | 0.932918 | 1.063312 | 0.90401  |
| ZC3HAV1 | 0.93044  | 0.866017 | 0.999655 | 0.048909 |
| TTC26   | 1.071639 | 0.974865 | 1.17802  | 0.151914 |
| OGDH    | 1.024219 | 0.959271 | 1.093565 | 0.474032 |
| ADAP1   | 1.077981 | 0.997459 | 1.165003 | 0.057996 |
| TFEC    | 0.99164  | 0.942802 | 1.043008 | 0.744585 |
| CAV2    | 0.94055  | 0.862438 | 1.025737 | 0.165891 |
| CAV1    | 0.914952 | 0.867977 | 0.964469 | 0.000949 |
| MET     | 1.118845 | 1.034669 | 1.209869 | 0.004893 |
| RNF32   | 0.980026 | 0.899402 | 1.067877 | 0.645057 |

|          |          |          |          |          |
|----------|----------|----------|----------|----------|
| LMBR1    | 0.953771 | 0.889816 | 1.022323 | 0.181375 |
| HOXA1    | 1.186917 | 1.121253 | 1.256426 | 3.61E-09 |
| DNAJB6   | 0.919007 | 0.856209 | 0.986411 | 0.019344 |
| HOXA2    | 1.160507 | 1.104055 | 1.219845 | 4.90E-09 |
| HOXA3    | 1.152393 | 1.111993 | 1.194261 | 6.70E-15 |
| LFNG     | 1.051604 | 1.007362 | 1.097789 | 0.021765 |
| HOXA5    | 1.104723 | 1.07791  | 1.132202 | 1.95E-15 |
| HOXA6    | 1.121065 | 1.09259  | 1.150283 | 3.16E-18 |
| IQCE     | 1.283453 | 1.18149  | 1.394215 | 3.45E-09 |
| TSPAN12  | 1.05502  | 0.939218 | 1.185099 | 0.366591 |
| SSBP1    | 0.968488 | 0.882103 | 1.063331 | 0.501756 |
| HOXA13   | 1.133538 | 1.062203 | 1.209664 | 0.000157 |
| HIBADH   | 1.120543 | 1.038883 | 1.208623 | 0.003198 |
| TAX1BP1  | 0.939547 | 0.866369 | 1.018907 | 0.13175  |
| CPVL     | 1.092172 | 1.050079 | 1.135952 | 1.10E-05 |
| CHN2     | 1.074062 | 0.970946 | 1.188129 | 0.165315 |
| GRB10    | 0.971144 | 0.927299 | 1.017061 | 0.214143 |
| ABHD11   | 1.346552 | 1.238996 | 1.463445 | 2.46E-12 |
| FKBP14   | 1.072599 | 1.016902 | 1.131347 | 0.009995 |
| PLEKHA8  | 1.04338  | 0.982183 | 1.10839  | 0.168509 |
| STX1A    | 1.007256 | 0.958213 | 1.058809 | 0.776494 |
| NOD1     | 0.941448 | 0.87821  | 1.009239 | 0.088992 |
| CRHR2    | 0.939134 | 0.825869 | 1.067933 | 0.338239 |
| EPHB6    | 0.992965 | 0.930574 | 1.059538 | 0.831142 |
| CASP2    | 0.939295 | 0.87682  | 1.006221 | 0.074529 |
| CHCHD2   | 0.938894 | 0.842117 | 1.046793 | 0.255949 |
| CCL24    | 0.982298 | 0.912043 | 1.057966 | 0.637126 |
| HSPB1    | 1.070432 | 1.023873 | 1.119109 | 0.002702 |
| NPTX2    | 0.961671 | 0.916655 | 1.008898 | 0.110089 |
| PDAP1    | 1.03539  | 0.921561 | 1.163279 | 0.558361 |
| BUD31    | 0.934253 | 0.839261 | 1.039996 | 0.213823 |
| PTCD1    | 1.069415 | 0.963469 | 1.18701  | 0.207376 |
| CYP3A5   | 1.074983 | 0.978782 | 1.180638 | 0.130632 |
| ZKSCAN1  | 1.018911 | 0.956665 | 1.085206 | 0.56023  |
| EIF3B    | 1.01425  | 0.927645 | 1.108941 | 0.756019 |
| SNX8     | 1.256382 | 1.138619 | 1.386326 | 5.49E-06 |
| NUDT1    | 1.219922 | 1.108413 | 1.342649 | 4.81E-05 |
| TAF6     | 1.076605 | 0.968191 | 1.197159 | 0.172875 |
| WASL     | 0.982572 | 0.911258 | 1.059467 | 0.647425 |
| AIMP2    | 1.005771 | 0.904312 | 1.118613 | 0.915531 |
| TFR2     | 0.994159 | 0.94986  | 1.040524 | 0.801112 |
| FSCN3    | 1.030928 | 0.939481 | 1.131277 | 0.520407 |
| MOSPD3   | 1.17358  | 1.083705 | 1.270908 | 8.23E-05 |
| PCOLCE   | 1.262669 | 1.113497 | 1.431825 | 0.000277 |
| FBXO24   | 1.05714  | 0.956002 | 1.168977 | 0.278807 |
| RBM28    | 1.054973 | 0.976102 | 1.140217 | 0.177065 |
| USP42    | 0.906642 | 0.845651 | 0.972032 | 0.00581  |
| IMPDH1   | 0.917668 | 0.854492 | 0.985515 | 0.01823  |
| AGFG2    | 1.069715 | 0.983778 | 1.163159 | 0.114751 |
| LSM5     | 1.044693 | 0.936953 | 1.164823 | 0.431096 |
| SERPINE1 | 1.013872 | 0.967076 | 1.062933 | 0.567718 |
| AP1S1    | 1.135199 | 1.065951 | 1.208945 | 7.86E-05 |
| C1GALT1  | 1.00606  | 0.927856 | 1.090855 | 0.883653 |
| PLOD3    | 0.965216 | 0.892748 | 1.043568 | 0.373977 |
| RPA3     | 1.178994 | 1.058133 | 1.31366  | 0.002846 |
| ZNHIT1   | 1.076701 | 0.948889 | 1.221729 | 0.251695 |
| CLDN15   | 0.948016 | 0.881352 | 1.019723 | 0.151294 |
| GLCCI1   | 1.048912 | 0.981196 | 1.121301 | 0.16078  |



|          |          |          |          |          |
|----------|----------|----------|----------|----------|
| PHF14    | 1.012961 | 0.932922 | 1.099867 | 0.759114 |
| NRF1     | 0.947128 | 0.877237 | 1.022587 | 0.164868 |
| TMEM106I | 1.030602 | 0.947005 | 1.121578 | 0.484937 |
| EZH2     | 0.984936 | 0.923488 | 1.050471 | 0.644202 |
| ZNF862   | 1.048892 | 0.965305 | 1.139717 | 0.259922 |
| SFRP4    | 1.164845 | 1.024004 | 1.325056 | 0.020301 |
| MEST     | 0.871697 | 0.83712  | 0.907702 | 2.94E-11 |
| ANKMY2   | 0.883749 | 0.817074 | 0.955864 | 0.002016 |
| TSPAN13  | 1.033292 | 0.980182 | 1.089279 | 0.223809 |
| RARRES2  | 0.787931 | 0.713654 | 0.86994  | 2.38E-06 |
| AGR2     | 0.992709 | 0.922706 | 1.068022 | 0.844496 |
| AHR      | 1.087246 | 1.027923 | 1.149993 | 0.003478 |
| CHCHD3   | 1.03077  | 0.921868 | 1.152538 | 0.59475  |
| GIMAP2   | 0.991601 | 0.926687 | 1.061062 | 0.807098 |
| TMEM176I | 0.937652 | 0.900225 | 0.976635 | 0.001951 |
| PSMA2    | 0.994115 | 0.922173 | 1.07167  | 0.877608 |
| MRPL32   | 1.051667 | 0.949128 | 1.165283 | 0.335824 |
| BLVRA    | 0.927695 | 0.880069 | 0.977899 | 0.005253 |
| STAG3L4  | 0.870844 | 0.788616 | 0.961647 | 0.00628  |
| RHEB     | 0.873285 | 0.788723 | 0.966913 | 0.009121 |
| PRKAG2   | 0.867073 | 0.795069 | 0.945598 | 0.001262 |
| AEBP1    | 0.998649 | 0.951804 | 1.047799 | 0.956003 |
| POLD2    | 1.121842 | 1.035726 | 1.215119 | 0.004782 |
| BCL7B    | 0.873129 | 0.801044 | 0.951701 | 0.002029 |
| YKT6     | 0.962638 | 0.883809 | 1.048498 | 0.382379 |
| TBL2     | 1.09464  | 1.003677 | 1.193847 | 0.041064 |
| CLIP2    | 1.101466 | 1.047716 | 1.157974 | 0.000153 |
| EIF4H    | 0.921408 | 0.849158 | 0.999806 | 0.049458 |
| LIMK1    | 1.123049 | 1.034273 | 1.219445 | 0.005744 |
| FKTN     | 1.135584 | 1.036849 | 1.243721 | 0.00615  |
| FSD1L    | 1.232868 | 1.118691 | 1.358699 | 2.42E-05 |
| CNTNAP3  | 1.15056  | 1.049796 | 1.260995 | 0.002707 |
| SPIN1    | 1.050877 | 0.973489 | 1.134417 | 0.203544 |
| PRUNE2   | 1.185087 | 1.084285 | 1.295261 | 0.000181 |
| MEGF9    | 0.984185 | 0.931059 | 1.040343 | 0.573399 |
| TRIM14   | 0.971573 | 0.907724 | 1.039912 | 0.405669 |
| CORO2A   | 0.973802 | 0.922616 | 1.027828 | 0.335233 |
| TGFBR1   | 0.950184 | 0.889139 | 1.01542  | 0.131482 |
| SEC61B   | 0.935735 | 0.854986 | 1.024112 | 0.149153 |
| C5       | 0.998677 | 0.930464 | 1.071891 | 0.970747 |
| OGN      | 1.063089 | 0.992818 | 1.138334 | 0.079535 |
| ASPN     | 1.032534 | 0.970385 | 1.098664 | 0.312103 |
| ECM2     | 1.045634 | 0.974674 | 1.121761 | 0.213302 |
| TLE4     | 0.915127 | 0.857589 | 0.976526 | 0.00743  |
| LHX6     | 0.893003 | 0.82095  | 0.97138  | 0.008378 |
| PTGR1    | 0.976473 | 0.89969  | 1.059809 | 0.56883  |
| SUSD1    | 0.994596 | 0.927728 | 1.066283 | 0.878711 |
| AKNA     | 0.961364 | 0.899739 | 1.02721  | 0.243727 |
| TNFSF8   | 0.907191 | 0.854718 | 0.962885 | 0.001355 |
| DNM1     | 0.88307  | 0.837172 | 0.931484 | 4.96E-06 |
| ENG      | 1.096753 | 1.020282 | 1.178954 | 0.012263 |
| AK1      | 1.245744 | 1.121679 | 1.383532 | 4.04E-05 |
| CDC37L1  | 1.025179 | 0.927894 | 1.132665 | 0.624959 |
| TBC1D13  | 0.983885 | 0.906508 | 1.067867 | 0.697469 |
| DOCK8    | 1.020357 | 0.960215 | 1.084265 | 0.515589 |
| KANK1    | 1.11646  | 1.050258 | 1.186836 | 0.000412 |
| TESK1    | 0.98039  | 0.896364 | 1.072294 | 0.664872 |
| FUBP3    | 1.022931 | 0.936224 | 1.117669 | 0.615879 |

|           |          |          |          |          |
|-----------|----------|----------|----------|----------|
| CREB3     | 1.05842  | 0.95317  | 1.175291 | 0.288029 |
| RGP1      | 0.935867 | 0.867853 | 1.009212 | 0.085114 |
| DDX58     | 1.034297 | 0.967702 | 1.105476 | 0.320662 |
| EDF1      | 1.013078 | 0.909375 | 1.128607 | 0.813571 |
| PIP5K1B   | 0.984706 | 0.926069 | 1.047055 | 0.622693 |
| GLIS3     | 0.67985  | 0.604808 | 0.764202 | 1.00E-10 |
| BAG1      | 0.944311 | 0.853348 | 1.044971 | 0.267536 |
| RAPGEF1   | 0.971219 | 0.907282 | 1.039662 | 0.400623 |
| NPDC1     | 1.031512 | 0.982768 | 1.082673 | 0.209053 |
| APBA1     | 0.981885 | 0.894163 | 1.078213 | 0.701824 |
| SETX      | 0.979795 | 0.919989 | 1.043489 | 0.525291 |
| PTGDS     | 0.910044 | 0.821325 | 1.008347 | 0.071683 |
| ABCA2     | 1.075074 | 1.016514 | 1.137007 | 0.011305 |
| SHB       | 0.828337 | 0.763538 | 0.898635 | 5.85E-06 |
| UBE2R2    | 0.877858 | 0.79893  | 0.964584 | 0.006726 |
| EXOSC3    | 1.116599 | 1.020309 | 1.221976 | 0.016533 |
| ZFAND5    | 0.881722 | 0.818101 | 0.950291 | 0.000987 |
| DVL1      | 1.036457 | 0.952915 | 1.127322 | 0.403644 |
| PDLIM1    | 0.954022 | 0.912442 | 0.997498 | 0.038439 |
| CCNJ      | 0.94023  | 0.873542 | 1.012009 | 0.100603 |
| DNTT      | 1.005587 | 0.97434  | 1.037835 | 0.7294   |
| GATA3     | 1.069499 | 1.012703 | 1.129482 | 0.015807 |
| HPS1      | 1.107486 | 0.9919   | 1.23654  | 0.069469 |
| PHYH      | 1.167726 | 1.065165 | 1.280162 | 0.000947 |
| RASSF4    | 1.076261 | 1.026243 | 1.128717 | 0.002471 |
| DNMBP     | 1.008671 | 0.93848  | 1.084111 | 0.814516 |
| RAB11FIP2 | 0.984184 | 0.907392 | 1.067475 | 0.700518 |
| CXCL12    | 1.020631 | 0.979608 | 1.06337  | 0.329241 |
| ERLIN1    | 0.949472 | 0.895817 | 1.006341 | 0.08064  |
| EIF3A     | 0.893723 | 0.824694 | 0.96853  | 0.006151 |
| CUBN      | 1.154164 | 1.065805 | 1.249847 | 0.000418 |
| TRDMT1    | 1.149919 | 1.054944 | 1.253443 | 0.001493 |
| DDX50     | 1.032799 | 0.93963  | 1.135207 | 0.503462 |
| MAPK8     | 0.995929 | 0.916496 | 1.082246 | 0.923362 |
| SEC23IP   | 1.086978 | 0.992321 | 1.190664 | 0.072793 |
| ATE1      | 0.974597 | 0.898256 | 1.057425 | 0.536384 |
| NSMCE4A   | 1.216376 | 1.096891 | 1.348876 | 0.000205 |
| PLEKHA1   | 1.088345 | 0.989668 | 1.19686  | 0.080847 |
| UNC5B     | 1.113999 | 1.056351 | 1.174793 | 6.83E-05 |
| CDH23     | 1.232482 | 1.150982 | 1.319753 | 2.12E-09 |
| SPOCK2    | 1.001715 | 0.959298 | 1.046008 | 0.938139 |
| PPP3CB    | 1.003094 | 0.918752 | 1.095179 | 0.945039 |
| BMPR1A    | 1.172199 | 1.066245 | 1.288682 | 0.001013 |
| MINPP1    | 1.066419 | 1.013455 | 1.122151 | 0.013354 |
| ACTA2     | 0.974942 | 0.899918 | 1.056221 | 0.534498 |
| LIPA      | 1.144977 | 1.068    | 1.227503 | 0.000137 |
| LZTS2     | 0.957296 | 0.897683 | 1.020867 | 0.183388 |
| SFXN3     | 1.150293 | 1.076233 | 1.229449 | 3.73E-05 |
| KAZALD1   | 1.361573 | 1.228453 | 1.50912  | 4.11E-09 |
| FBXW4     | 1.143567 | 1.043193 | 1.253599 | 0.004208 |
| NPM3      | 0.982602 | 0.907313 | 1.064138 | 0.666082 |
| TNKS2     | 0.98735  | 0.923909 | 1.055146 | 0.707115 |
| GBF1      | 1.017806 | 0.933236 | 1.110039 | 0.690068 |
| ARHGAP2   | 1.055525 | 1.007594 | 1.105736 | 0.022666 |
| CPEB3     | 1.142414 | 1.035856 | 1.259933 | 0.007696 |
| FBXL15    | 1.180905 | 1.049355 | 1.328947 | 0.00579  |
| CUEDC2    | 1.078906 | 0.970263 | 1.199714 | 0.160766 |
| SUFU      | 1.053829 | 0.977078 | 1.13661  | 0.174169 |

|          |          |          |          |          |
|----------|----------|----------|----------|----------|
| ANKRD26  | 0.941602 | 0.850422 | 1.042557 | 0.246881 |
| ACBD5    | 0.962081 | 0.883337 | 1.047844 | 0.37493  |
| LHPP     | 1.195592 | 1.085627 | 1.316696 | 0.000285 |
| LARP4B   | 1.020919 | 0.961909 | 1.083548 | 0.495539 |
| GTPBP4   | 0.905329 | 0.836477 | 0.979848 | 0.013725 |
| BCCIP    | 1.065042 | 0.954293 | 1.188644 | 0.260658 |
| MTPAP    | 1.062028 | 0.96305  | 1.171179 | 0.227942 |
| SH3PXD2A | 0.958319 | 0.906164 | 1.013476 | 0.13593  |
| PITRM1   | 1.088112 | 0.987176 | 1.199367 | 0.089109 |
| MAP3K8   | 0.955665 | 0.888486 | 1.027923 | 0.22269  |
| EBF3     | 0.949934 | 0.875368 | 1.030851 | 0.218149 |
| GLRX3    | 1.04245  | 0.939245 | 1.156994 | 0.434453 |
| SORCS1   | 0.872422 | 0.770989 | 0.987201 | 0.030446 |
| XPNPEP1  | 0.874983 | 0.81194  | 0.942921 | 0.000465 |
| SMC3     | 0.983085 | 0.90346  | 1.069728 | 0.692212 |
| SHOC2    | 0.9829   | 0.91543  | 1.055344 | 0.634529 |
| TFAM     | 1.098072 | 1.003183 | 1.201938 | 0.042471 |
| CCDC6    | 1.094607 | 1.011279 | 1.184801 | 0.025247 |
| CUL2     | 0.990822 | 0.914302 | 1.073745 | 0.822095 |
| CCNY     | 0.888686 | 0.817757 | 0.965767 | 0.005424 |
| UBE2S    | 0.972967 | 0.903776 | 1.047456 | 0.466543 |
| RPL28    | 0.91224  | 0.852297 | 0.9764   | 0.008081 |
| ZMIZ1    | 1.049638 | 0.972536 | 1.132853 | 0.2133   |
| DNAJC12  | 1.039789 | 0.974105 | 1.109903 | 0.241218 |
| PPIF     | 1.137852 | 1.046599 | 1.237061 | 0.002463 |
| PBLD     | 0.955622 | 0.893472 | 1.022095 | 0.185837 |
| TSPAN14  | 1.065739 | 0.995675 | 1.140733 | 0.066498 |
| TBC1D12  | 1.179117 | 1.121599 | 1.239585 | 1.07E-10 |
| KRT23    | 1.192228 | 1.11871  | 1.270576 | 6.15E-08 |
| CRYBA1   | 0.987379 | 0.94006  | 1.03708  | 0.612226 |
| NUFIP2   | 0.946868 | 0.888293 | 1.009306 | 0.093803 |
| GIT1     | 0.981912 | 0.906269 | 1.063869 | 0.655398 |
| RPL19    | 0.867975 | 0.798675 | 0.943289 | 0.000852 |
| FBXL20   | 0.978011 | 0.909846 | 1.051283 | 0.546376 |
| RUNDC3A  | 1.082216 | 1.021141 | 1.146944 | 0.00768  |
| UBTF     | 1.20224  | 1.099543 | 1.314529 | 5.28E-05 |
| CSF3     | 1.042474 | 0.962288 | 1.129341 | 0.308383 |
| PSMD3    | 1.004847 | 0.905191 | 1.115474 | 0.927704 |
| CASC3    | 1.016904 | 0.916451 | 1.128368 | 0.752097 |
| RAPGEFL1 | 0.98987  | 0.915374 | 1.070429 | 0.798683 |
| RGS9     | 0.928333 | 0.822305 | 1.048033 | 0.229446 |
| RNF43    | 0.956147 | 0.871575 | 1.048925 | 0.342586 |
| RAD51C   | 1.324644 | 1.180768 | 1.486051 | 1.65E-06 |
| MTMR4    | 1.077939 | 1.004259 | 1.157023 | 0.037744 |
| TRIM37   | 1.102049 | 1.01482  | 1.196775 | 0.020908 |
| P2RX1    | 0.983797 | 0.910821 | 1.062619 | 0.67783  |
| DHX40    | 0.939285 | 0.86381  | 1.021355 | 0.142768 |
| TUBD1    | 1.056034 | 0.974632 | 1.144235 | 0.182814 |
| KPNB1    | 0.99637  | 0.923058 | 1.075506 | 0.925704 |
| GOSR2    | 1.113433 | 1.02752  | 1.20653  | 0.008726 |
| PNPO     | 1.265182 | 1.168003 | 1.370446 | 8.00E-09 |
| RPS6KB1  | 0.979636 | 0.907782 | 1.057178 | 0.596564 |
| TRIM16L  | 1.082972 | 0.956421 | 1.226268 | 0.20868  |
| CDK5RAP3 | 1.213792 | 1.107393 | 1.330414 | 3.48E-05 |
| CBX1     | 1.160592 | 1.066659 | 1.262797 | 0.000543 |
| RECQL5   | 1.041987 | 0.963928 | 1.126368 | 0.300551 |
| PIGL     | 0.965799 | 0.885052 | 1.053913 | 0.434685 |
| GALK1    | 1.00453  | 0.933959 | 1.080433 | 0.903213 |

|          |          |          |          |          |
|----------|----------|----------|----------|----------|
| INTS2    | 1.020989 | 0.947368 | 1.100331 | 0.586448 |
| CAMTA2   | 1.072611 | 0.976361 | 1.17835  | 0.143947 |
| MED13    | 0.982526 | 0.922816 | 1.046101 | 0.581592 |
| HOXB6    | 1.078435 | 1.040494 | 1.117758 | 3.59E-05 |
| ENO3     | 1.176383 | 1.07314  | 1.289558 | 0.000528 |
| PFN1     | 1.054952 | 0.971906 | 1.145095 | 0.200977 |
| RNF167   | 1.185457 | 1.059717 | 1.326117 | 0.002941 |
| SLC25A11 | 1.124446 | 1.025881 | 1.23248  | 0.012215 |
| RASD1    | 0.989459 | 0.94201  | 1.039299 | 0.672571 |
| CHRNE    | 0.893541 | 0.819501 | 0.974271 | 0.010754 |
| RAI1     | 0.980233 | 0.915798 | 1.0492   | 0.564941 |
| NUP88    | 0.960234 | 0.889751 | 1.036301 | 0.29684  |
| C1QBP    | 0.915305 | 0.845467 | 0.990912 | 0.028858 |
| SLC6A4   | 1.113624 | 0.95569  | 1.297658 | 0.167846 |
| BLMH     | 0.978661 | 0.89798  | 1.066591 | 0.623161 |
| CPD      | 0.944504 | 0.891716 | 1.000416 | 0.051679 |
| GOSR1    | 1.057918 | 0.967644 | 1.156613 | 0.216008 |
| CCDC47   | 0.954003 | 0.888449 | 1.024393 | 0.194821 |
| MED31    | 1.214307 | 1.105019 | 1.334404 | 5.45E-05 |
| DRG2     | 1.104029 | 0.997303 | 1.222177 | 0.056404 |
| FTSJ3    | 1.004609 | 0.920961 | 1.095855 | 0.917426 |
| AKAP10   | 1.016229 | 0.944078 | 1.093894 | 0.668329 |
| SMARCD2  | 0.924286 | 0.846776 | 1.008891 | 0.078088 |
| ICAM2    | 1.142397 | 1.047263 | 1.246174 | 0.002691 |
| SYNGR2   | 1.120188 | 1.008929 | 1.243716 | 0.03346  |
| B9D1     | 1.10604  | 0.951272 | 1.285988 | 0.190047 |
| UTP6     | 1.009809 | 0.929578 | 1.096965 | 0.817239 |
| DDX5     | 0.997173 | 0.922635 | 1.077732 | 0.943064 |
| CYTH1    | 0.928871 | 0.872576 | 0.988799 | 0.020718 |
| PSMD11   | 1.054045 | 0.961685 | 1.155274 | 0.260607 |
| LGALS3BP | 1.009666 | 0.966647 | 1.054599 | 0.664999 |
| CCL7     | 1.105638 | 1.051425 | 1.162646 | 9.04E-05 |
| CCL2     | 1.12302  | 1.074979 | 1.173209 | 1.98E-07 |
| CCL1     | 1.1097   | 1.054051 | 1.168286 | 7.33E-05 |
| PEX12    | 1.180332 | 1.062429 | 1.31132  | 0.002017 |
| DHX58    | 1.08577  | 1.004084 | 1.174101 | 0.039198 |
| KAT2A    | 1.111051 | 1.040355 | 1.186551 | 0.001693 |
| RAB5C    | 0.913457 | 0.834136 | 1.000321 | 0.050814 |
| NAGLU    | 1.08319  | 0.978965 | 1.198511 | 0.121597 |
| HSD17B1  | 1.180323 | 0.99696  | 1.39741  | 0.054277 |
| MLX      | 0.961684 | 0.863752 | 1.070719 | 0.475852 |
| CNTNAP1  | 0.99199  | 0.920965 | 1.068493 | 0.831971 |
| ABI3     | 1.18069  | 1.116928 | 1.248092 | 4.52E-09 |
| EZH1     | 0.998977 | 0.926828 | 1.076743 | 0.978647 |
| DLX4     | 1.223686 | 1.119016 | 1.338146 | 9.65E-06 |
| PPP1R9B  | 1.061828 | 0.985705 | 1.14383  | 0.113968 |
| COL1A1   | 1.129748 | 1.062995 | 1.200692 | 8.64E-05 |
| MRPL27   | 1.202811 | 1.083701 | 1.335012 | 0.000519 |
| VAT1     | 0.86398  | 0.81529  | 0.915577 | 7.80E-07 |
| LRRC59   | 0.95861  | 0.886826 | 1.036205 | 0.287145 |
| RND2     | 1.118784 | 0.97578  | 1.282745 | 0.107706 |
| ALOX12   | 0.978525 | 0.903172 | 1.060166 | 0.595448 |
| HDAC5    | 0.974923 | 0.902411 | 1.053261 | 0.519547 |
| ABCC3    | 1.117061 | 1.02632  | 1.215825 | 0.010438 |
| MPP2     | 1.082418 | 0.999629 | 1.172064 | 0.051079 |
| SMURF2   | 0.996803 | 0.924183 | 1.075128 | 0.933872 |
| DUSP3    | 1.027067 | 0.957659 | 1.101506 | 0.454402 |
| EFTUD2   | 1.039851 | 0.953495 | 1.134027 | 0.377018 |

|          |          |          |          |          |
|----------|----------|----------|----------|----------|
| HLF      | 1.144486 | 1.070592 | 1.22348  | 7.40E-05 |
| SLC16A6  | 1.123008 | 1.050506 | 1.200513 | 0.000657 |
| PRKAR1A  | 1.107016 | 1.02405  | 1.196703 | 0.010531 |
| FAM20A   | 1.034694 | 0.970415 | 1.10323  | 0.297304 |
| YWHAE    | 1.0133   | 0.914584 | 1.12267  | 0.800542 |
| MMD      | 1.17599  | 1.092352 | 1.266032 | 1.66E-05 |
| RANGRF   | 1.523134 | 1.243087 | 1.866271 | 4.93E-05 |
| DPH1     | 1.206995 | 1.089327 | 1.337374 | 0.000325 |
| MAP2K6   | 1.150859 | 1.065701 | 1.242822 | 0.000341 |
| DHRS7B   | 1.14314  | 1.029834 | 1.268913 | 0.012007 |
| WSB1     | 0.94851  | 0.885633 | 1.015852 | 0.130906 |
| RCVRN    | 0.899661 | 0.805582 | 1.004726 | 0.060615 |
| SLC9A3R1 | 0.955247 | 0.883958 | 1.032284 | 0.247263 |
| MYH3     | 1.013767 | 0.91701  | 1.120733 | 0.789345 |
| NAT9     | 0.99765  | 0.912301 | 1.090984 | 0.958878 |
| TMEM104  | 0.957162 | 0.897681 | 1.020584 | 0.181053 |
| VTN      | 1.04454  | 0.974064 | 1.120115 | 0.221461 |
| TNFAIP1  | 1.011046 | 0.924888 | 1.105231 | 0.808981 |
| IFT20    | 1.063586 | 0.968075 | 1.16852  | 0.199106 |
| TMEM97   | 1.153193 | 1.068311 | 1.244819 | 0.000258 |
| CDR2L    | 1.238329 | 1.126332 | 1.361462 | 9.89E-06 |
| PMP22    | 0.847507 | 0.769315 | 0.933647 | 0.000808 |
| UNC119   | 1.188689 | 1.100021 | 1.284505 | 1.24E-05 |
| ALDOC    | 1.040323 | 0.958426 | 1.129218 | 0.34469  |
| SUPT6H   | 0.879679 | 0.810925 | 0.954264 | 0.002019 |
| RAB34    | 0.935399 | 0.899594 | 0.97263  | 0.000798 |
| PHF12    | 0.885308 | 0.813825 | 0.963069 | 0.004568 |
| TMEM33   | 1.042912 | 0.967877 | 1.123764 | 0.270061 |
| GNRHR    | 1.020561 | 0.919849 | 1.132299 | 0.70103  |
| SLAIN2   | 0.93724  | 0.858156 | 1.023611 | 0.149555 |
| OCIAD1   | 1.037527 | 0.931613 | 1.155482 | 0.502493 |
| DCUN1D4  | 1.0088   | 0.935906 | 1.087372 | 0.818895 |
| USP46    | 1.024368 | 0.949268 | 1.105409 | 0.535419 |
| CHIC2    | 0.959677 | 0.87538  | 1.052092 | 0.38026  |
| NMU      | 1.067698 | 0.985561 | 1.15668  | 0.108748 |
| PF4V1    | 1.043685 | 0.96502  | 1.128762 | 0.284882 |
| NFKB1    | 0.937744 | 0.880609 | 0.998586 | 0.045062 |
| AREG     | 0.96729  | 0.936581 | 0.999006 | 0.043342 |
| MANBA    | 0.925221 | 0.85921  | 0.996304 | 0.039589 |
| UBE2D3   | 0.910695 | 0.828626 | 1.000892 | 0.052202 |
| ELF2     | 0.997825 | 0.919986 | 1.08225  | 0.958091 |
| NDUFC1   | 1.194915 | 1.068505 | 1.336281 | 0.0018   |
| TBC1D9   | 1.057344 | 1.010296 | 1.106583 | 0.016349 |
| ZNF330   | 1.023452 | 0.916785 | 1.142529 | 0.679753 |
| INPP4B   | 1.167909 | 1.110783 | 1.227973 | 1.31E-09 |
| GAB1     | 0.94827  | 0.886808 | 1.013993 | 0.120294 |
| KLHL2    | 0.994376 | 0.931639 | 1.061338 | 0.865308 |
| RPL34    | 0.918843 | 0.850735 | 0.992403 | 0.031237 |
| WFS1     | 1.050892 | 0.955411 | 1.155915 | 0.307066 |
| GRPEL1   | 1.025545 | 0.937809 | 1.12149  | 0.580401 |
| GAR1     | 1.039742 | 0.939325 | 1.150893 | 0.452013 |
| FRG1     | 0.921817 | 0.820118 | 1.036128 | 0.172281 |
| CLCN3    | 1.064966 | 1.001863 | 1.132043 | 0.043415 |
| AADAT    | 0.87725  | 0.82174  | 0.936509 | 8.61E-05 |
| GALNT7   | 0.957823 | 0.891906 | 1.028611 | 0.236202 |
| DHX15    | 0.974091 | 0.910544 | 1.042074 | 0.445681 |
| SEPSECS  | 1.015098 | 0.943893 | 1.091674 | 0.686328 |
| SLC2A9   | 1.078041 | 1.016714 | 1.143068 | 0.011915 |

|          |          |          |          |          |
|----------|----------|----------|----------|----------|
| FBXW7    | 0.983414 | 0.904693 | 1.068985 | 0.694408 |
| NEIL3    | 1.027379 | 0.967898 | 1.090516 | 0.374711 |
| TBC1D19  | 1.070184 | 0.989847 | 1.15704  | 0.088447 |
| CLNK     | 1.154989 | 1.053432 | 1.266337 | 0.002152 |
| SH3D19   | 0.924211 | 0.867162 | 0.985012 | 0.01533  |
| STIM2    | 1.145591 | 1.059557 | 1.23861  | 0.000644 |
| MFSD10   | 0.886889 | 0.826338 | 0.951876 | 0.000878 |
| GLRB     | 1.074092 | 0.987922 | 1.167777 | 0.0939   |
| BST1     | 1.033865 | 0.984153 | 1.086089 | 0.185292 |
| RAPGEF2  | 1.071903 | 1.008331 | 1.139482 | 0.026018 |
| HGFAC    | 0.939614 | 0.827905 | 1.066396 | 0.334789 |
| SNX25    | 1.009636 | 0.94835  | 1.074882 | 0.764068 |
| LRP2BP   | 1.078956 | 0.988899 | 1.177215 | 0.087463 |
| UFSP2    | 1.095823 | 0.99132  | 1.211342 | 0.073539 |
| KLF3     | 0.847906 | 0.788182 | 0.912156 | 9.55E-06 |
| KLHL5    | 0.94052  | 0.874643 | 1.011359 | 0.097902 |
| NCAPG    | 1.067044 | 1.003717 | 1.134366 | 0.037633 |
| UGDH     | 1.065915 | 0.99146  | 1.14596  | 0.084022 |
| HTATIP2  | 1.14476  | 1.068699 | 1.226235 | 0.000116 |
| CTSC     | 1.008556 | 0.931961 | 1.091446 | 0.83256  |
| CCDC34   | 1.153277 | 1.057511 | 1.257715 | 0.001263 |
| ZBTB16   | 0.920794 | 0.879771 | 0.96373  | 0.000387 |
| ELP4     | 1.15991  | 1.042138 | 1.290992 | 0.006617 |
| MTCH2    | 1.107451 | 0.991785 | 1.236606 | 0.06977  |
| FNBP4    | 0.921405 | 0.854784 | 0.993219 | 0.032545 |
| TECTA    | 1.268391 | 1.132083 | 1.421111 | 4.15E-05 |
| CRTAM    | 1.056771 | 0.969879 | 1.151447 | 0.207187 |
| HSPA8    | 0.96373  | 0.897088 | 1.035323 | 0.312258 |
| VWA5A    | 1.187161 | 1.111341 | 1.268154 | 3.49E-07 |
| DNAJC4   | 1.036573 | 0.932491 | 1.152272 | 0.505841 |
| SIAE     | 0.969339 | 0.904132 | 1.03925  | 0.380795 |
| LPXN     | 0.989587 | 0.925544 | 1.058062 | 0.759125 |
| DTX4     | 1.06417  | 1.012814 | 1.11813  | 0.013721 |
| ATG2A    | 1.011603 | 0.954765 | 1.071825 | 0.695789 |
| EHD1     | 0.989243 | 0.92384  | 1.059276 | 0.756636 |
| OSBP     | 0.933361 | 0.869842 | 1.001519 | 0.055141 |
| UNC93B1  | 1.03173  | 0.972158 | 1.094952 | 0.30328  |
| PUS3     | 1.057397 | 0.943595 | 1.184924 | 0.336735 |
| DCPS     | 1.214273 | 1.113478 | 1.324192 | 1.13E-05 |
| FOXRED1  | 1.167819 | 1.052852 | 1.295338 | 0.003346 |
| NRXN2    | 1.066344 | 1.009706 | 1.126159 | 0.021064 |
| MS4A6A   | 1.002126 | 0.967378 | 1.038121 | 0.90612  |
| MS4A4A   | 1.034176 | 0.98406  | 1.086843 | 0.184854 |
| ST3GAL4  | 1.142426 | 1.080836 | 1.207525 | 2.49E-06 |
| CPT1A    | 1.089308 | 1.008594 | 1.176481 | 0.02942  |
| CCND1    | 1.027233 | 0.967224 | 1.090966 | 0.381646 |
| CCDC86   | 1.02811  | 0.94239  | 1.121627 | 0.532553 |
| PRPF19   | 1.013448 | 0.934625 | 1.098918 | 0.746419 |
| TMEM109  | 1.120792 | 1.042344 | 1.205144 | 0.002069 |
| HPX      | 1.080157 | 0.945211 | 1.234369 | 0.257456 |
| TRIM3    | 1.033258 | 0.945856 | 1.128736 | 0.468127 |
| CHORDC1  | 1.040318 | 0.970311 | 1.115376 | 0.266117 |
| FOLR1    | 1.218619 | 1.110642 | 1.337094 | 2.96E-05 |
| FOLR3    | 1.010801 | 0.969142 | 1.05425  | 0.616881 |
| PANX1    | 1.069531 | 0.993509 | 1.15137  | 0.073959 |
| ARHGEF17 | 0.94477  | 0.894786 | 0.997547 | 0.04051  |
| CEP164   | 1.169064 | 1.065297 | 1.282939 | 0.000989 |
| RNF141   | 1.227922 | 1.117451 | 1.349314 | 1.97E-05 |

|          |          |          |          |          |
|----------|----------|----------|----------|----------|
| EIF4G2   | 0.965707 | 0.884749 | 1.054074 | 0.43474  |
| IL10RA   | 0.997189 | 0.947985 | 1.048947 | 0.913187 |
| BIRC2    | 1.112523 | 1.01859  | 1.215118 | 0.017826 |
| UBE4A    | 1.078123 | 0.992521 | 1.171108 | 0.074732 |
| DDX6     | 0.992233 | 0.928887 | 1.059898 | 0.8168   |
| UPK2     | 1.000317 | 0.890606 | 1.123543 | 0.995738 |
| CBL      | 0.950081 | 0.89019  | 1.014001 | 0.123211 |
| HIPK3    | 0.924714 | 0.865699 | 0.987752 | 0.020006 |
| FBXO3    | 1.031361 | 0.968346 | 1.098476 | 0.33706  |
| PDHX     | 1.109538 | 1.019816 | 1.207153 | 0.015689 |
| SLC1A2   | 0.916818 | 0.81886  | 1.026494 | 0.131966 |
| COMMD9   | 1.005904 | 0.910003 | 1.11191  | 0.908329 |
| SLC15A3  | 1.025856 | 0.979677 | 1.074212 | 0.277369 |
| CD5      | 0.990609 | 0.941431 | 1.042356 | 0.716466 |
| ACCS     | 0.95048  | 0.900877 | 1.002813 | 0.063277 |
| MDK      | 0.904575 | 0.854902 | 0.957134 | 0.000501 |
| AMBRA1   | 0.983158 | 0.921417 | 1.049035 | 0.607734 |
| MADD     | 0.998414 | 0.930895 | 1.070831 | 0.964568 |
| PTPMT1   | 1.059201 | 0.926424 | 1.211008 | 0.399991 |
| SLC22A18 | 1.203099 | 1.109526 | 1.304564 | 7.61E-06 |
| CD81     | 1.06503  | 0.994408 | 1.140668 | 0.071898 |
| SLC35F2  | 0.8795   | 0.832144 | 0.929551 | 5.44E-06 |
| SOX6     | 1.053136 | 0.982573 | 1.128767 | 0.143433 |
| PITPNM1  | 0.896784 | 0.839488 | 0.957991 | 0.001221 |
| RPS13    | 0.90769  | 0.837135 | 0.984191 | 0.018979 |
| AIP      | 0.978254 | 0.885743 | 1.080428 | 0.664462 |
| NUP98    | 0.926694 | 0.868933 | 0.988294 | 0.020419 |
| NDUFS8   | 1.307978 | 1.159858 | 1.475015 | 1.20E-05 |
| TCIRG1   | 1.026752 | 0.962636 | 1.095138 | 0.422283 |
| CHKA     | 0.91962  | 0.862702 | 0.980294 | 0.010155 |
| EXPH5    | 1.423595 | 1.305525 | 1.552342 | 1.29E-15 |
| HPS5     | 1.015961 | 0.945938 | 1.091168 | 0.663855 |
| GTF2H1   | 1.045018 | 0.961919 | 1.135297 | 0.297599 |
| POU2AF1  | 1.000288 | 0.937295 | 1.067515 | 0.993073 |
| VWF      | 1.128157 | 1.084783 | 1.173264 | 1.66E-09 |
| PSMD9    | 1.039204 | 0.930605 | 1.160477 | 0.494696 |
| PPFIBP1  | 1.083513 | 1.019427 | 1.151629 | 0.009923 |
| PRPF40B  | 1.218949 | 1.105627 | 1.343885 | 6.98E-05 |
| CD69     | 1.062761 | 1.011312 | 1.116829 | 0.016206 |
| PRDM4    | 0.973935 | 0.892652 | 1.06262  | 0.552532 |
| CLEC2B   | 1.050318 | 0.998825 | 1.104466 | 0.055606 |
| COQ5     | 1.076403 | 0.98582  | 1.175309 | 0.100684 |
| SELPLG   | 1.075449 | 1.025075 | 1.128299 | 0.002961 |
| CORO1C   | 0.999857 | 0.926092 | 1.079497 | 0.997083 |
| CAPRIN2  | 1.157498 | 1.089095 | 1.230198 | 2.53E-06 |
| TSPAN11  | 1.320885 | 1.161455 | 1.5022   | 2.23E-05 |
| KCTD10   | 0.980822 | 0.898995 | 1.070098 | 0.663078 |
| SLC11A2  | 1.034915 | 0.961804 | 1.113583 | 0.358563 |
| MLEC     | 0.97216  | 0.909623 | 1.038995 | 0.405232 |
| MVK      | 1.153214 | 1.041558 | 1.276838 | 0.006076 |
| CSRNP2   | 1.023677 | 0.942545 | 1.111793 | 0.578578 |
| CAMKK2   | 0.980978 | 0.91556  | 1.05107  | 0.585461 |
| BIN2     | 1.056474 | 0.984518 | 1.133689 | 0.1269   |
| IL23A    | 1.047308 | 0.974469 | 1.12559  | 0.208834 |
| PTGES3   | 1.027612 | 0.922495 | 1.144706 | 0.620807 |
| BCL7A    | 1.170984 | 1.101744 | 1.244575 | 3.86E-07 |
| RSRC2    | 0.930113 | 0.860903 | 1.004888 | 0.066304 |
| CYP27B1  | 1.067122 | 0.976517 | 1.166135 | 0.151273 |

|          |          |          |          |          |
|----------|----------|----------|----------|----------|
| LIN7A    | 0.984541 | 0.941738 | 1.02929  | 0.492094 |
| KRT18    | 0.977835 | 0.94372  | 1.013183 | 0.21605  |
| GLI1     | 1.040226 | 0.965416 | 1.120833 | 0.300353 |
| PPM1H    | 0.997299 | 0.943937 | 1.053677 | 0.923199 |
| METAP2   | 0.948926 | 0.859866 | 1.04721  | 0.297141 |
| LTA4H    | 0.965892 | 0.891196 | 1.046848 | 0.398074 |
| ELK3     | 1.040563 | 0.965961 | 1.120926 | 0.29484  |
| SLC6A12  | 1.025551 | 0.93674  | 1.122783 | 0.585115 |
| WNT5B    | 0.794563 | 0.701053 | 0.900546 | 0.000319 |
| MAGOHB   | 1.27786  | 1.148206 | 1.422155 | 7.06E-06 |
| TRPV4    | 1.299444 | 1.164712 | 1.449762 | 2.73E-06 |
| ITFG2    | 1.042949 | 0.953329 | 1.140994 | 0.358963 |
| FOXM1    | 1.123929 | 1.038808 | 1.216025 | 0.003644 |
| PRR4     | 1.048307 | 0.939084 | 1.170232 | 0.400698 |
| PARP11   | 1.012803 | 0.936886 | 1.094871 | 0.748964 |
| ARPC3    | 0.976398 | 0.890044 | 1.07113  | 0.613174 |
| GPN3     | 0.975644 | 0.894363 | 1.064312 | 0.578503 |
| VPS29    | 1.152258 | 1.043062 | 1.272886 | 0.005272 |
| RAD51AP1 | 1.126759 | 1.053731 | 1.204849 | 0.000482 |
| CUX2     | 1.139147 | 1.050771 | 1.234956 | 0.001567 |
| SH2B3    | 1.023233 | 0.953153 | 1.098466 | 0.525769 |
| MANSC1   | 1.037575 | 0.955816 | 1.126328 | 0.378409 |
| DUSP16   | 0.964206 | 0.901701 | 1.031044 | 0.28645  |
| CREBL2   | 1.053143 | 0.977356 | 1.134806 | 0.174187 |
| ACAD10   | 1.063156 | 0.984838 | 1.147703 | 0.116732 |
| ALDH2    | 1.166526 | 1.10335  | 1.23332  | 5.89E-08 |
| CDKN1B   | 0.974551 | 0.903176 | 1.051566 | 0.506508 |
| GPRC5D   | 1.005013 | 0.912256 | 1.107201 | 0.919388 |
| GSG1     | 1.123456 | 0.949014 | 1.329962 | 0.176337 |
| SCNN1A   | 1.06968  | 0.892465 | 1.282085 | 0.466065 |
| LTBR     | 0.940861 | 0.871119 | 1.016188 | 0.120828 |
| OGFOD2   | 1.175146 | 1.047144 | 1.318796 | 0.006091 |
| CDK2AP1  | 1.072184 | 0.985035 | 1.167044 | 0.107101 |
| OAS3     | 1.074577 | 1.02478  | 1.126794 | 0.002968 |
| OAS2     | 1.056629 | 1.00522  | 1.110667 | 0.030422 |
| ART4     | 1.031633 | 0.952923 | 1.116844 | 0.441836 |
| MGP      | 0.866391 | 0.762558 | 0.984362 | 0.027669 |
| RASAL1   | 0.873022 | 0.826552 | 0.922105 | 1.14E-06 |
| ARHGDI1B | 0.986961 | 0.912906 | 1.067023 | 0.741545 |
| GTF2H3   | 1.097351 | 1.007309 | 1.195441 | 0.033447 |
| EIF2B1   | 1.2142   | 1.093649 | 1.348039 | 0.000275 |
| DDX55    | 1.156079 | 1.050622 | 1.272121 | 0.00296  |
| SLC38A1  | 0.97609  | 0.930618 | 1.023784 | 0.3201   |
| VDR      | 1.18182  | 1.118953 | 1.248219 | 2.10E-09 |
| RFC5     | 1.227176 | 1.112054 | 1.354215 | 4.64E-05 |
| STX2     | 0.984392 | 0.919068 | 1.05436  | 0.65342  |
| COPZ1    | 1.094203 | 0.978931 | 1.223048 | 0.112955 |
| CAND1    | 0.980108 | 0.912739 | 1.052449 | 0.580255 |
| IFNG     | 1.039187 | 0.957801 | 1.127489 | 0.355601 |
| RAB5B    | 0.951009 | 0.885827 | 1.020986 | 0.165553 |
| MDM1     | 1.089595 | 0.999147 | 1.18823  | 0.0523   |
| NUP107   | 1.047541 | 0.968759 | 1.13273  | 0.244299 |
| CNOT2    | 0.925972 | 0.861455 | 0.995321 | 0.036867 |
| TIMELESS | 1.135806 | 1.064425 | 1.211975 | 0.00012  |
| CPSF6    | 0.958605 | 0.887504 | 1.035401 | 0.282288 |
| KRR1     | 0.953541 | 0.886169 | 1.026036 | 0.203207 |
| MRPL51   | 1.079055 | 0.988459 | 1.177955 | 0.089032 |
| GAPDH    | 0.916993 | 0.844474 | 0.99574  | 0.039253 |



|          |          |          |          |          |
|----------|----------|----------|----------|----------|
| NOP2     | 0.968221 | 0.907288 | 1.033245 | 0.33015  |
| CHD4     | 1.050751 | 0.963385 | 1.14604  | 0.263675 |
| ACRBP    | 1.094363 | 1.012051 | 1.183371 | 0.023808 |
| UHRF1BP1 | 0.964158 | 0.891024 | 1.043294 | 0.364457 |
| COPS7A   | 1.158265 | 1.053696 | 1.273211 | 0.002339 |
| ING4     | 1.046363 | 0.964865 | 1.134744 | 0.273326 |
| GNB3     | 1.201563 | 1.069557 | 1.34986  | 0.001985 |
| CDCA3    | 1.227078 | 1.130809 | 1.331543 | 9.15E-07 |
| CHPT1    | 0.848293 | 0.78249  | 0.919628 | 6.50E-05 |
| USP5     | 1.12415  | 1.033988 | 1.222174 | 0.006078 |
| TP11     | 1.093623 | 0.998638 | 1.197642 | 0.053537 |
| GNPTAB   | 0.879082 | 0.828801 | 0.932415 | 1.80E-05 |
| SPSB2    | 1.063548 | 0.985335 | 1.147968 | 0.113903 |
| ENO2     | 1.200683 | 1.124035 | 1.282559 | 5.51E-08 |
| ATN1     | 0.994509 | 0.938759 | 1.053569 | 0.851603 |
| PTPN6    | 1.089131 | 1.003579 | 1.181977 | 0.040801 |
| LPCAT3   | 1.328032 | 1.185094 | 1.488209 | 1.05E-06 |
| NT5DC3   | 0.959722 | 0.913847 | 1.007899 | 0.099948 |
| SUDS3    | 1.036112 | 0.961983 | 1.115954 | 0.348943 |
| GOLT1B   | 1.086656 | 0.995164 | 1.186559 | 0.064035 |
| LDHB     | 1.097651 | 1.009136 | 1.19393  | 0.029859 |
| PRKAB1   | 1.023529 | 0.932437 | 1.12352  | 0.624827 |
| CMAS     | 1.167001 | 1.078291 | 1.263008 | 0.000129 |
| HCFC2    | 1.138239 | 1.045763 | 1.238892 | 0.002745 |
| CLEC4A   | 0.958105 | 0.854556 | 1.074202 | 0.463321 |
| RAB35    | 0.924589 | 0.85351  | 1.001588 | 0.054722 |
| PHC1     | 0.963493 | 0.885855 | 1.047936 | 0.385599 |
| COX6A1   | 1.143327 | 1.030689 | 1.268273 | 0.011367 |
| RIC8B    | 1.180389 | 1.084708 | 1.28451  | 0.00012  |
| FGFR1OP2 | 1.045102 | 0.958193 | 1.139893 | 0.319308 |
| KLRB1    | 1.054262 | 0.992632 | 1.119719 | 0.085554 |
| BTN3A3   | 1.056276 | 0.986524 | 1.130959 | 0.116247 |
| DSE      | 0.953272 | 0.887629 | 1.023771 | 0.188643 |
| RWDD1    | 1.0805   | 0.968631 | 1.205287 | 0.165008 |
| MAK      | 1.005472 | 0.92828  | 1.089082 | 0.893486 |
| TMEM14C  | 1.077077 | 0.994545 | 1.166458 | 0.067927 |
| PAK1IP1  | 1.18627  | 1.092827 | 1.287703 | 4.49E-05 |
| GCNT2    | 1.107847 | 1.037463 | 1.183005 | 0.002227 |
| NEDD9    | 1.018498 | 0.94977  | 1.0922   | 0.607107 |
| ASF1A    | 1.043703 | 0.962472 | 1.13179  | 0.300808 |
| MCM9     | 1.028817 | 0.948235 | 1.116247 | 0.494801 |
| RNGTT    | 1.038277 | 0.962048 | 1.120545 | 0.334302 |
| MAN1A1   | 0.900113 | 0.861378 | 0.940589 | 2.74E-06 |
| GABRR2   | 1.098468 | 1.014392 | 1.189514 | 0.020796 |
| SERINC1  | 0.965861 | 0.901297 | 1.03505  | 0.325099 |
| HDDC2    | 1.145972 | 1.040749 | 1.261833 | 0.005558 |
| HINT3    | 0.991807 | 0.909631 | 1.081407 | 0.85211  |
| NCOA7    | 0.928308 | 0.874397 | 0.985544 | 0.01481  |
| SASH1    | 1.076933 | 1.001327 | 1.158248 | 0.045969 |
| UST      | 1.075216 | 0.991562 | 1.165927 | 0.079276 |
| FBXO5    | 1.144149 | 1.068833 | 1.224771 | 0.000106 |
| MTRF1L   | 0.962804 | 0.857356 | 1.081222 | 0.521865 |
| PPARD    | 1.037982 | 0.976719 | 1.103087 | 0.229738 |
| FANCE    | 1.121538 | 1.042821 | 1.206196 | 0.002007 |
| SLC26A8  | 0.99686  | 0.932114 | 1.066103 | 0.926859 |
| MAPK14   | 0.992589 | 0.933126 | 1.055842 | 0.813438 |
| RHAG     | 1.041882 | 1.012573 | 1.072039 | 0.004829 |
| KCTD20   | 0.969473 | 0.891696 | 1.054033 | 0.467461 |

|          |          |          |          |          |
|----------|----------|----------|----------|----------|
| STK38    | 0.980731 | 0.920162 | 1.045288 | 0.549709 |
| SOD2     | 1.127428 | 1.052694 | 1.207468 | 0.000609 |
| MRPL18   | 1.214099 | 1.107639 | 1.330792 | 3.42E-05 |
| MCM3     | 1.113677 | 1.047172 | 1.184405 | 0.00061  |
| RNF8     | 1.251799 | 1.116288 | 1.403761 | 0.000122 |
| PHACTR1  | 1.109563 | 1.027892 | 1.197724 | 0.007695 |
| MDGA1    | 1.081059 | 1.002457 | 1.165823 | 0.043002 |
| FBXO9    | 1.101355 | 1.013105 | 1.197292 | 0.023483 |
| CD83     | 0.930129 | 0.88183  | 0.981074 | 0.007761 |
| MDN1     | 1.000102 | 0.943429 | 1.060179 | 0.997265 |
| BACH2    | 1.024828 | 0.974585 | 1.077661 | 0.33896  |
| TREML2   | 1.045617 | 0.981672 | 1.113728 | 0.165918 |
| ZNF451   | 0.973396 | 0.918553 | 1.031512 | 0.362114 |
| BAG2     | 1.293344 | 1.18501  | 1.411583 | 8.25E-09 |
| RAB23    | 1.456314 | 1.295186 | 1.637488 | 3.31E-10 |
| KHDRBS2  | 1.185918 | 1.094071 | 1.285476 | 3.38E-05 |
| FBXL4    | 1.0402   | 0.966682 | 1.11931  | 0.291935 |
| CCNC     | 0.988387 | 0.909822 | 1.073736 | 0.782227 |
| E2F3     | 0.982863 | 0.913612 | 1.057362 | 0.642859 |
| PTP4A1   | 0.937135 | 0.877097 | 1.001282 | 0.054601 |
| ASCC3    | 1.076896 | 1.003553 | 1.155599 | 0.039541 |
| BVES     | 1.129106 | 1.072489 | 1.188712 | 3.72E-06 |
| MED23    | 0.976506 | 0.916381 | 1.040577 | 0.463417 |
| WASF1    | 0.991422 | 0.947808 | 1.037042 | 0.70741  |
| GPLD1    | 1.127717 | 1.031599 | 1.232791 | 0.008183 |
| ALDH5A1  | 1.077375 | 1.009825 | 1.149443 | 0.024076 |
| VNN1     | 1.057038 | 1.016161 | 1.099559 | 0.005839 |
| VNN2     | 1.018228 | 0.979539 | 1.058444 | 0.360738 |
| SMAP1    | 0.980657 | 0.86527  | 1.11143  | 0.759736 |
| RPS12    | 0.936566 | 0.881807 | 0.994726 | 0.033008 |
| B3GAT2   | 1.268291 | 1.155343 | 1.392281 | 5.91E-07 |
| GMNN     | 1.118557 | 1.025835 | 1.21966  | 0.011159 |
| SOBP     | 1.246016 | 1.158274 | 1.340404 | 3.55E-09 |
| SNX3     | 1.021185 | 0.90589  | 1.151154 | 0.731625 |
| HBS1L    | 0.974837 | 0.908658 | 1.045835 | 0.477385 |
| TRIM38   | 1.017759 | 0.949635 | 1.09077  | 0.618485 |
| PEX7     | 1.215476 | 1.086461 | 1.359811 | 0.000653 |
| ZBTB24   | 1.230896 | 1.115226 | 1.358563 | 3.69E-05 |
| FIG4     | 1.079252 | 0.977834 | 1.191189 | 0.129832 |
| PERP     | 1.402286 | 1.208809 | 1.626731 | 8.07E-06 |
| SLC16A10 | 1.153591 | 1.038659 | 1.28124  | 0.007623 |
| HECA     | 0.951506 | 0.891604 | 1.015433 | 0.134046 |
| PHACTR2  | 1.040342 | 0.972521 | 1.112894 | 0.250203 |
| EPM2A    | 0.993558 | 0.895952 | 1.101797 | 0.902505 |
| SLC39A7  | 0.944155 | 0.874141 | 1.019777 | 0.143797 |
| PHF1     | 0.916381 | 0.8488   | 0.989343 | 0.025478 |
| CUTA     | 1.036067 | 0.93156  | 1.152298 | 0.513669 |
| QKI      | 0.860004 | 0.800202 | 0.924276 | 4.11E-05 |
| MDFI     | 0.988095 | 0.940946 | 1.037608 | 0.631174 |
| TFEB     | 1.105534 | 1.034686 | 1.181233 | 0.002988 |
| CCND3    | 1.22381  | 1.134876 | 1.319714 | 1.55E-07 |
| BYSL     | 1.126984 | 1.045047 | 1.215345 | 0.001909 |
| FAM120B  | 1.092069 | 1.019499 | 1.169804 | 0.012059 |
| TBP      | 1.009298 | 0.911118 | 1.118058 | 0.859312 |
| GUCA1B   | 0.968331 | 0.895223 | 1.047408 | 0.421687 |
| PRPH2    | 1.072445 | 0.975472 | 1.179059 | 0.148066 |
| PPP2R5D  | 1.031088 | 0.929597 | 1.14366  | 0.562535 |
| MRPL2    | 1.406776 | 1.214474 | 1.629529 | 5.34E-06 |

|         |          |          |          |          |
|---------|----------|----------|----------|----------|
| PTK7    | 0.95361  | 0.908419 | 1.001049 | 0.055157 |
| SRF     | 0.964466 | 0.880755 | 1.056133 | 0.434789 |
| CUL9    | 1.013652 | 0.940964 | 1.091956 | 0.720971 |
| DUSP22  | 0.965247 | 0.893954 | 1.042225 | 0.366251 |
| EXOC2   | 1.085422 | 1.00547  | 1.171732 | 0.035754 |
| COX7A2  | 1.053395 | 0.976983 | 1.135782 | 0.175769 |
| TMEM30A | 1.058802 | 0.980554 | 1.143293 | 0.144661 |
| GMDS    | 1.011558 | 0.932567 | 1.097239 | 0.781771 |
| SENP6   | 1.083195 | 1.008528 | 1.163389 | 0.028308 |
| VEGFA   | 0.92498  | 0.878149 | 0.974308 | 0.003262 |
| PRPF4B  | 0.970177 | 0.904521 | 1.0406   | 0.397088 |
| TTK     | 1.085462 | 1.016129 | 1.159525 | 0.014888 |
| SLC29A1 | 1.05126  | 0.975105 | 1.133362 | 0.192609 |
| BTN2A1  | 0.991628 | 0.910259 | 1.08027  | 0.847381 |
| LAMA4   | 1.249845 | 1.004582 | 1.554987 | 0.045395 |
| CLIC5   | 1.195585 | 1.072795 | 1.33243  | 0.001234 |
| LY86    | 1.021036 | 0.983363 | 1.060153 | 0.277777 |
| HARS2   | 1.069842 | 0.976999 | 1.171508 | 0.144961 |
| NUDT12  | 1.087957 | 0.983766 | 1.203181 | 0.100734 |
| CEP72   | 1.145508 | 1.059511 | 1.238484 | 0.000645 |
| MAN2A1  | 1.064601 | 0.993076 | 1.141277 | 0.077705 |
| HMGCS1  | 1.115005 | 1.02947  | 1.207646 | 0.007514 |
| DAP     | 0.891935 | 0.816245 | 0.974644 | 0.011485 |
| BRD8    | 1.031649 | 0.94752  | 1.123248 | 0.472811 |
| KIF20A  | 1.09317  | 1.033845 | 1.1559   | 0.001753 |
| NNT     | 1.052013 | 0.972864 | 1.137601 | 0.203873 |
| MRPS30  | 1.084439 | 0.978616 | 1.201706 | 0.121779 |
| HSPA9   | 0.95444  | 0.874691 | 1.041459 | 0.294889 |
| MRPS27  | 0.961673 | 0.880403 | 1.050446 | 0.385667 |
| PFDN1   | 1.031497 | 0.919697 | 1.156888 | 0.596242 |
| HBEGF   | 1.042105 | 0.997858 | 1.088314 | 0.062451 |
| LOX     | 1.208466 | 1.122757 | 1.300718 | 4.54E-07 |
| GZMK    | 1.065898 | 0.988014 | 1.149922 | 0.099254 |
| CDH9    | 1.050409 | 0.975556 | 1.131006 | 0.192287 |
| APBB3   | 1.067408 | 0.989289 | 1.151695 | 0.092521 |
| TMCO6   | 1.112402 | 1.013768 | 1.220632 | 0.024537 |
| SPARC   | 0.937909 | 0.904348 | 0.972715 | 0.000565 |
| IK      | 1.055623 | 0.931156 | 1.196729 | 0.397747 |
| HMGCR   | 1.046632 | 0.965686 | 1.134362 | 0.267099 |
| FAF2    | 1.004028 | 0.925241 | 1.089524 | 0.923192 |
| PDE8B   | 1.107201 | 0.901561 | 1.359746 | 0.331331 |
| CLK4    | 1.068376 | 0.986248 | 1.157344 | 0.10509  |
| HAVCR1  | 0.878296 | 0.817006 | 0.944185 | 0.000438 |
| ITK     | 1.001621 | 0.952943 | 1.052785 | 0.949204 |
| RNF130  | 0.8345   | 0.768718 | 0.905911 | 1.57E-05 |
| THG1L   | 0.92307  | 0.835464 | 1.019862 | 0.115625 |
| ARSB    | 0.97636  | 0.901305 | 1.057666 | 0.557741 |
| CLINT1  | 0.893806 | 0.834047 | 0.957848 | 0.001474 |
| THBS4   | 1.025585 | 0.967357 | 1.087318 | 0.396921 |
| CNOT6   | 1.020267 | 0.949429 | 1.096391 | 0.584718 |
| BTNL8   | 1.000873 | 0.897118 | 1.116629 | 0.987526 |
| TTC1    | 1.086248 | 0.97938  | 1.204776 | 0.11743  |
| MSH3    | 0.999459 | 0.925313 | 1.079546 | 0.989024 |
| RASGRF2 | 1.072373 | 0.967841 | 1.188195 | 0.18178  |
| CCNG1   | 0.891584 | 0.833206 | 0.954053 | 0.000896 |
| POLR3G  | 0.955611 | 0.856293 | 1.066448 | 0.417397 |
| LMNB1   | 1.048556 | 0.982904 | 1.118593 | 0.150645 |
| ARRDC3  | 0.978049 | 0.925573 | 1.033501 | 0.43021  |

|          |          |          |          |          |
|----------|----------|----------|----------|----------|
| GOLPH3   | 0.985342 | 0.909074 | 1.068009 | 0.719412 |
| SUB1     | 0.964558 | 0.871808 | 1.067175 | 0.484204 |
| NPR3     | 0.937423 | 0.905352 | 0.970631 | 0.000275 |
| FAM172A  | 1.080001 | 0.991651 | 1.176223 | 0.077156 |
| SLC27A6  | 0.927172 | 0.860686 | 0.998793 | 0.046397 |
| LNPEP    | 1.014197 | 0.957207 | 1.07458  | 0.632824 |
| PDE4D    | 0.980119 | 0.921339 | 1.042649 | 0.524514 |
| RAD1     | 1.140852 | 1.028763 | 1.265154 | 0.012511 |
| BRIX1    | 1.098621 | 0.993598 | 1.214745 | 0.066552 |
| PRLR     | 1.013502 | 0.952604 | 1.078293 | 0.671425 |
| SLC12A7  | 1.004062 | 0.951678 | 1.05933  | 0.882127 |
| RAD50    | 1.271605 | 1.092171 | 1.480519 | 0.001962 |
| ST8SIA4  | 0.946754 | 0.873901 | 1.02568  | 0.18047  |
| GNPDA1   | 1.065372 | 0.997599 | 1.13775  | 0.058988 |
| PCDH12   | 1.129013 | 1.034931 | 1.231649 | 0.006269 |
| SKP1     | 0.998056 | 0.923206 | 1.078974 | 0.960981 |
| NUP155   | 1.059124 | 0.982782 | 1.141397 | 0.132337 |
| PPP2CA   | 0.938384 | 0.861079 | 1.02263  | 0.14711  |
| NR3C1    | 0.941433 | 0.877403 | 1.010136 | 0.093086 |
| PPWD1    | 0.989378 | 0.920853 | 1.063003 | 0.770595 |
| LIFR     | 0.939339 | 0.812148 | 1.08645  | 0.399229 |
| TRIM23   | 1.026638 | 0.957083 | 1.101248 | 0.462661 |
| SEC24A   | 0.90381  | 0.842232 | 0.969889 | 0.004967 |
| TXNDC15  | 1.024448 | 0.940294 | 1.116134 | 0.580745 |
| TTC33    | 1.101997 | 0.990439 | 1.226119 | 0.074497 |
| TCERG1   | 0.957092 | 0.883634 | 1.036656 | 0.281751 |
| DPYSL3   | 1.041908 | 0.992861 | 1.093379 | 0.095168 |
| SMAD5    | 0.934076 | 0.871157 | 1.00154  | 0.055273 |
| CSNK1A1  | 0.98183  | 0.907266 | 1.062523 | 0.649091 |
| ERGIC1   | 0.922956 | 0.852851 | 0.998824 | 0.046683 |
| PDGFRB   | 0.950638 | 0.891936 | 1.013203 | 0.119559 |
| ATP6V0E1 | 1.075353 | 0.9927   | 1.164887 | 0.075009 |
| BNIP1    | 0.965105 | 0.873536 | 1.066271 | 0.484962 |
| CPEB4    | 1.016942 | 0.958969 | 1.07842  | 0.57481  |
| HRH2     | 1.085973 | 1.036181 | 1.138157 | 0.000573 |
| DBN1     | 1.028675 | 0.981579 | 1.078031 | 0.237054 |
| ZNF346   | 1.017161 | 0.928763 | 1.113973 | 0.713754 |
| UNC5A    | 1.054529 | 0.997466 | 1.114856 | 0.061403 |
| EHHADH   | 1.147679 | 1.060535 | 1.241983 | 0.000629 |
| SMC4     | 1.097027 | 1.025066 | 1.174041 | 0.00747  |
| ACTR8    | 1.012347 | 0.927992 | 1.104369 | 0.782209 |
| TBCCD1   | 1.157096 | 1.057996 | 1.265478 | 0.001403 |
| CRBN     | 0.946915 | 0.868321 | 1.032622 | 0.217266 |
| BCL6     | 0.973165 | 0.919518 | 1.029941 | 0.347097 |
| HGD      | 1.066118 | 0.976634 | 1.1638   | 0.152324 |
| ARL6     | 1.264803 | 1.113096 | 1.437186 | 0.000314 |
| NPHP3    | 1.085167 | 0.966753 | 1.218085 | 0.165619 |
| CD86     | 1.020576 | 0.977776 | 1.065249 | 0.351454 |
| AMOTL2   | 1.225557 | 1.114406 | 1.347795 | 2.75E-05 |
| NIT2     | 0.929038 | 0.846134 | 1.020065 | 0.122736 |
| FAM162A  | 1.087271 | 0.97537  | 1.21201  | 0.131062 |
| OGG1     | 1.281026 | 1.181997 | 1.388352 | 1.61E-09 |
| KPNA1    | 1.061137 | 0.980342 | 1.14859  | 0.141939 |
| PCCB     | 1.024903 | 0.934935 | 1.123528 | 0.599767 |
| UBE3A    | 0.945973 | 0.878741 | 1.018348 | 0.139784 |
| ARMC8    | 1.018604 | 0.946933 | 1.0957   | 0.620477 |
| CEP70    | 1.072748 | 1.009749 | 1.139677 | 0.022957 |
| RBP2     | 0.979253 | 0.917403 | 1.045272 | 0.528811 |

|          |          |          |          |          |
|----------|----------|----------|----------|----------|
| SLC25A36 | 0.917062 | 0.854086 | 0.984682 | 0.017069 |
| GRK7     | 0.966807 | 0.859614 | 1.087367 | 0.573434 |
| RNF7     | 0.985479 | 0.888522 | 1.093017 | 0.781931 |
| TFDP2    | 1.000384 | 0.93452  | 1.07089  | 0.991178 |
| XRN1     | 0.968753 | 0.914044 | 1.026737 | 0.284462 |
| KAT2B    | 0.996372 | 0.932465 | 1.064659 | 0.914418 |
| SERPINI2 | 1.061639 | 1.007906 | 1.118237 | 0.024    |
| PDCD10   | 1.043365 | 0.949175 | 1.146903 | 0.379187 |
| PFKFB4   | 0.988841 | 0.929687 | 1.051758 | 0.721417 |
| COL7A1   | 0.984272 | 0.920636 | 1.052306 | 0.64202  |
| PRKAR2A  | 0.993065 | 0.902903 | 1.092231 | 0.886058 |
| HES1     | 1.121913 | 1.069245 | 1.177175 | 2.74E-06 |
| USP4     | 1.004562 | 0.924473 | 1.091589 | 0.914493 |
| ACAP2    | 1.002136 | 0.931152 | 1.078531 | 0.954601 |
| ECT2     | 1.057022 | 0.989702 | 1.128921 | 0.098606 |
| GNAT1    | 0.935264 | 0.845889 | 1.034082 | 0.191562 |
| GNAI2    | 0.858655 | 0.788242 | 0.935358 | 0.000482 |
| TFG      | 0.902554 | 0.830426 | 0.980947 | 0.015837 |
| USP9Y    | 1.024729 | 0.987429 | 1.063437 | 0.196618 |
| HYAL1    | 0.927844 | 0.850511 | 1.012209 | 0.091667 |
| TUSC2    | 0.945862 | 0.854117 | 1.047461 | 0.284976 |
| RPL24    | 0.875944 | 0.803621 | 0.954777 | 0.002591 |
| CYB561D2 | 1.077624 | 0.981391 | 1.183295 | 0.117259 |
| FXR1     | 0.873311 | 0.805707 | 0.946587 | 0.000983 |
| CBLB     | 0.951221 | 0.880467 | 1.027661 | 0.204765 |
| BBX      | 1.01458  | 0.94771  | 1.086169 | 0.677336 |
| IFT57    | 0.992578 | 0.901852 | 1.092431 | 0.878929 |
| GNB4     | 0.989221 | 0.918486 | 1.065403 | 0.77464  |
| HHLA2    | 0.870075 | 0.771674 | 0.981023 | 0.023035 |
| IQCG     | 1.182999 | 1.075206 | 1.301599 | 0.000566 |
| GBE1     | 0.92668  | 0.859964 | 0.998572 | 0.045777 |
| UMPS     | 1.155058 | 1.065642 | 1.251976 | 0.000454 |
| NCBP2    | 1.070751 | 0.973103 | 1.178198 | 0.161175 |
| SNX4     | 0.957065 | 0.874187 | 1.047801 | 0.342325 |
| FRMD4B   | 1.134152 | 1.060956 | 1.212398 | 0.000217 |
| SLC41A3  | 0.865063 | 0.780429 | 0.958875 | 0.005791 |
| PLXNA1   | 1.096809 | 1.02715  | 1.171192 | 0.005778 |
| ATP6V1A  | 1.063958 | 0.989289 | 1.144262 | 0.094938 |
| ABTB1    | 0.977567 | 0.909126 | 1.051161 | 0.540103 |
| PODXL2   | 1.040976 | 0.984525 | 1.100663 | 0.158037 |
| UPK1B    | 0.951936 | 0.868754 | 1.043083 | 0.291049 |
| CSPG5    | 1.02833  | 0.932869 | 1.133558 | 0.574118 |
| KLHL18   | 1.02487  | 0.945592 | 1.110795 | 0.549812 |
| SCAP     | 1.009594 | 0.938254 | 1.086359 | 0.798437 |
| NEK11    | 1.054715 | 0.962249 | 1.156067 | 0.255147 |
| MRPL3    | 1.020498 | 0.934143 | 1.114837 | 0.652859 |
| PLSCR4   | 1.231572 | 1.141833 | 1.328365 | 6.81E-08 |
| HEMK1    | 1.078489 | 0.994989 | 1.168996 | 0.066093 |
| CISH     | 1.015496 | 0.942112 | 1.094595 | 0.687828 |
| MAPKAPK  | 0.868308 | 0.800625 | 0.941712 | 0.000649 |
| ACVR2B   | 1.14533  | 1.065586 | 1.231041 | 0.000229 |
| WDR48    | 0.936276 | 0.880476 | 0.995614 | 0.035714 |
| COMMD2   | 1.124056 | 1.016336 | 1.243194 | 0.022893 |
| GORASP1  | 0.978344 | 0.896573 | 1.067573 | 0.62297  |
| RRP9     | 1.191507 | 1.108264 | 1.281001 | 2.12E-06 |
| ABCC5    | 1.083974 | 1.016085 | 1.156398 | 0.014544 |
| ABHD14B  | 0.97745  | 0.890209 | 1.07324  | 0.632533 |
| EIF1B    | 1.031541 | 0.936309 | 1.136461 | 0.529772 |

|         |          |          |          |          |
|---------|----------|----------|----------|----------|
| KLHL24  | 0.926538 | 0.875612 | 0.980425 | 0.00816  |
| PLCH1   | 1.010606 | 0.934628 | 1.092761 | 0.791334 |
| VIPR1   | 0.98221  | 0.898816 | 1.073341 | 0.691717 |
| DNAH1   | 1.01573  | 0.955679 | 1.079555 | 0.615691 |
| SSR3    | 1.033074 | 0.942398 | 1.132474 | 0.487547 |
| ZBTB47  | 1.140502 | 1.0607   | 1.226307 | 0.000382 |
| NKTR    | 0.964008 | 0.906815 | 1.024807 | 0.240117 |
| CLCN2   | 1.123873 | 1.006875 | 1.254466 | 0.037332 |
| FOXP1   | 1.021645 | 0.948866 | 1.100005 | 0.570085 |
| EIF4G1  | 0.984695 | 0.908218 | 1.067613 | 0.708481 |
| SPCS1   | 1.086435 | 0.99462  | 1.186724 | 0.065735 |
| NEK4    | 0.986741 | 0.905083 | 1.075767 | 0.762007 |
| SLC4A3  | 1.049479 | 0.973544 | 1.131336 | 0.207573 |
| INO80D  | 0.955327 | 0.892667 | 1.022385 | 0.186711 |
| EEF1B2  | 0.866491 | 0.808482 | 0.928661 | 5.05E-05 |
| ADAM23  | 1.037772 | 0.990405 | 1.087404 | 0.119837 |
| DGUOK   | 1.175469 | 1.053381 | 1.311708 | 0.003859 |
| LMAN2L  | 1.073712 | 0.994247 | 1.159528 | 0.069849 |
| RTKN    | 1.068729 | 0.988175 | 1.155849 | 0.096422 |
| TTL     | 1.079632 | 0.984913 | 1.18346  | 0.10195  |
| IL1A    | 1.229873 | 1.151536 | 1.31354  | 7.19E-10 |
| CCL20   | 1.156943 | 1.063443 | 1.258663 | 0.000697 |
| PIKFYVE | 0.956322 | 0.899182 | 1.017094 | 0.155386 |
| FAHD2A  | 1.168306 | 1.05097  | 1.298742 | 0.00397  |
| NCL     | 1.040077 | 0.945474 | 1.144147 | 0.419313 |
| ACTR1B  | 0.938235 | 0.871197 | 1.010432 | 0.091878 |
| SLC35F5 | 0.973985 | 0.919118 | 1.032128 | 0.372916 |
| ZAP70   | 0.916227 | 0.871901 | 0.962806 | 0.000544 |
| ACTR3   | 0.99379  | 0.908494 | 1.087095 | 0.89178  |
| STEAP3  | 1.009033 | 0.953525 | 1.067773 | 0.75542  |
| EPB41L5 | 1.054086 | 0.974302 | 1.140403 | 0.189628 |
| TFCP2L1 | 1.080863 | 0.992114 | 1.177552 | 0.075264 |
| TP53I3  | 0.962648 | 0.880032 | 1.053019 | 0.405678 |
| DNAJC27 | 1.104385 | 0.998929 | 1.220973 | 0.052497 |
| POMC    | 1.021073 | 0.964988 | 1.080418 | 0.469376 |
| STAM2   | 1.016498 | 0.933959 | 1.106331 | 0.704904 |
| OTOF    | 1.156827 | 1.094527 | 1.222673 | 2.50E-07 |
| GPD2    | 1.036041 | 0.971606 | 1.10475  | 0.279812 |
| CENPA   | 1.176539 | 1.095579 | 1.26348  | 7.84E-06 |
| CYTIP   | 0.881578 | 0.833978 | 0.931894 | 8.56E-06 |
| ACVR1   | 1.127556 | 1.051908 | 1.208644 | 0.000704 |
| TANC1   | 1.101847 | 1.048384 | 1.158037 | 0.000132 |
| SLC30A3 | 1.129966 | 0.993215 | 1.285545 | 0.063379 |
| MPV17   | 1.088643 | 0.984896 | 1.203317 | 0.096487 |
| GTF3C2  | 1.051003 | 0.954349 | 1.157446 | 0.312182 |
| EIF2B4  | 1.229174 | 1.090561 | 1.385405 | 0.000725 |
| NRBP1   | 0.82874  | 0.7552   | 0.909441 | 7.43E-05 |
| ITGA4   | 0.969791 | 0.91313  | 1.029968 | 0.317964 |
| PSMD14  | 1.149868 | 1.026331 | 1.288275 | 0.016034 |
| SNX17   | 0.992131 | 0.903286 | 1.089714 | 0.868905 |
| ASB3    | 0.982392 | 0.90904  | 1.061663 | 0.653665 |
| PPM1G   | 1.085305 | 0.97209  | 1.211705 | 0.145292 |
| REEP6   | 1.208553 | 1.125723 | 1.297478 | 1.70E-07 |
| PCSK4   | 1.075384 | 0.997996 | 1.158774 | 0.056481 |
| APC2    | 1.003869 | 0.911553 | 1.105535 | 0.937461 |
| IFIH1   | 0.989557 | 0.931088 | 1.051699 | 0.735498 |
| RPS15   | 0.930421 | 0.861247 | 1.005151 | 0.067306 |
| GCA     | 1.007539 | 0.953993 | 1.064091 | 0.787489 |

|         |          |          |          |          |
|---------|----------|----------|----------|----------|
| INO80B  | 1.32706  | 1.178542 | 1.494294 | 2.97E-06 |
| MOGS    | 0.980848 | 0.906412 | 1.061397 | 0.631067 |
| TTC31   | 1.078611 | 0.987505 | 1.178121 | 0.092819 |
| NDUFS7  | 1.44805  | 1.265301 | 1.657195 | 7.51E-08 |
| PCGF1   | 1.001937 | 0.907003 | 1.106807 | 0.969612 |
| CLIP4   | 1.033268 | 0.978031 | 1.091625 | 0.243012 |
| SPTBN1  | 0.927497 | 0.883207 | 0.974009 | 0.002571 |
| AUP1    | 1.326205 | 1.154466 | 1.523491 | 6.61E-05 |
| RTN4    | 0.894691 | 0.822307 | 0.973446 | 0.009732 |
| HTRA2   | 1.117195 | 1.003831 | 1.243362 | 0.042356 |
| LOXL3   | 0.928355 | 0.869853 | 0.990791 | 0.025185 |
| DOK1    | 0.968311 | 0.90196  | 1.039543 | 0.373917 |
| GALNT3  | 0.924377 | 0.877989 | 0.973215 | 0.002758 |
| POLE4   | 1.150295 | 1.058344 | 1.250236 | 0.000988 |
| TACR1   | 1.10162  | 0.976512 | 1.242756 | 0.115595 |
| CCDC88A | 0.918922 | 0.852403 | 0.990632 | 0.027422 |
| MRPL19  | 1.05869  | 0.970622 | 1.154749 | 0.198075 |
| LANCL1  | 1.111941 | 1.029831 | 1.200597 | 0.006709 |
| WDR75   | 1.025684 | 0.949246 | 1.108277 | 0.521016 |
| EFEMP1  | 1.06015  | 0.919166 | 1.222759 | 0.422397 |
| FANCL   | 1.055466 | 0.986439 | 1.129324 | 0.117748 |
| FN1     | 1.055122 | 0.987117 | 1.127811 | 0.114453 |
| STAT1   | 1.032425 | 0.974583 | 1.093699 | 0.278025 |
| GLS     | 0.968223 | 0.911737 | 1.028207 | 0.292359 |
| PAPOLG  | 0.999507 | 0.913364 | 1.093776 | 0.991453 |
| PECR    | 1.181635 | 1.103657 | 1.265122 | 1.66E-06 |
| UNC50   | 1.049587 | 0.96594  | 1.140478 | 0.25339  |
| IGFBP2  | 0.969271 | 0.933519 | 1.006391 | 0.103586 |
| ELMOD3  | 1.225896 | 1.122212 | 1.339159 | 6.27E-06 |
| IGFBP5  | 1.028948 | 0.95954  | 1.103377 | 0.423204 |
| USP34   | 0.971975 | 0.915912 | 1.03147  | 0.348373 |
| KCNJ13  | 0.97633  | 0.918874 | 1.037379 | 0.438874 |
| CCT4    | 0.949146 | 0.855879 | 1.052576 | 0.322659 |
| GGCX    | 0.962127 | 0.890981 | 1.038954 | 0.324613 |
| EHBP1   | 1.091414 | 1.01495  | 1.173638 | 0.018256 |
| TXNDC9  | 1.048656 | 0.935416 | 1.175605 | 0.415152 |
| COQ10B  | 0.961081 | 0.887217 | 1.041095 | 0.3306   |
| GNLY    | 1.063048 | 1.015045 | 1.113321 | 0.009504 |
| SF3B1   | 0.963391 | 0.896451 | 1.035329 | 0.310078 |
| ST3GAL5 | 0.890636 | 0.824971 | 0.961528 | 0.003037 |
| CHST10  | 1.057308 | 0.98391  | 1.13618  | 0.128993 |
| PDCL3   | 0.951314 | 0.876306 | 1.032744 | 0.233621 |
| HSPE1   | 1.094237 | 1.016295 | 1.178156 | 0.016909 |
| PLCD4   | 1.073496 | 0.965448 | 1.193635 | 0.190092 |
| ZNF142  | 1.113562 | 1.014465 | 1.222339 | 0.0237   |
| IL1R2   | 1.068847 | 1.025717 | 1.11379  | 0.001534 |
| IL1R1   | 1.106735 | 1.045164 | 1.171933 | 0.000516 |
| IL1RL1  | 0.854708 | 0.81431  | 0.89711  | 2.08E-10 |
| IL18R1  | 1.009428 | 0.955056 | 1.066894 | 0.739764 |
| IL18RAP | 1.041694 | 0.995271 | 1.090283 | 0.079063 |
| FHL2    | 1.087093 | 1.022903 | 1.15531  | 0.007162 |
| UXS1    | 0.972498 | 0.890334 | 1.062244 | 0.535776 |
| ABCB6   | 1.118793 | 1.014307 | 1.234043 | 0.024836 |
| STK16   | 1.108819 | 0.999545 | 1.230039 | 0.051012 |
| HDLBP   | 0.956281 | 0.880042 | 1.039124 | 0.291611 |
| PPP1R7  | 1.276743 | 1.14474  | 1.423967 | 1.15E-05 |
| PASK    | 1.12741  | 1.045418 | 1.215833 | 0.001852 |
| STK25   | 1.193025 | 1.081141 | 1.316487 | 0.000443 |

|          |          |          |          |          |
|----------|----------|----------|----------|----------|
| TPO      | 0.722644 | 0.639096 | 0.817113 | 2.19E-07 |
| PROC     | 0.887942 | 0.789143 | 0.999111 | 0.048297 |
| ID2      | 1.163934 | 1.104525 | 1.226538 | 1.35E-08 |
| TAF1B    | 1.146373 | 1.05952  | 1.240347 | 0.000678 |
| HPCAL1   | 0.95357  | 0.883637 | 1.029039 | 0.221189 |
| ODC1     | 1.012122 | 0.936788 | 1.093514 | 0.760118 |
| BIRC6    | 0.964084 | 0.916969 | 1.01362  | 0.152496 |
| NOL10    | 1.034382 | 0.942343 | 1.135411 | 0.477101 |
| PLEKHB2  | 0.936597 | 0.873953 | 1.003731 | 0.063662 |
| GORASP2  | 0.921444 | 0.840614 | 1.010047 | 0.080714 |
| STRN     | 0.944589 | 0.870661 | 1.024794 | 0.17039  |
| CEBPZ    | 1.059979 | 0.975072 | 1.152281 | 0.17151  |
| PRKD3    | 1.023872 | 0.966653 | 1.084478 | 0.421362 |
| QPCT     | 0.993424 | 0.947339 | 1.041752 | 0.785454 |
| RAB3GAP1 | 0.948573 | 0.874536 | 1.028878 | 0.202893 |
| SLC25A12 | 1.146902 | 1.053134 | 1.24902  | 0.001635 |
| DLX2     | 1.092847 | 1.01764  | 1.173612 | 0.014661 |
| LCT      | 1.207118 | 1.085373 | 1.342518 | 0.00052  |
| SDC1     | 0.966893 | 0.871711 | 1.072469 | 0.52429  |
| PLCL1    | 1.067501 | 0.994252 | 1.146146 | 0.071701 |
| SLC1A4   | 1.061114 | 0.997812 | 1.128432 | 0.058734 |
| SOS1     | 0.989083 | 0.922333 | 1.060662 | 0.758135 |
| KYNU     | 1.05098  | 0.989898 | 1.115831 | 0.103608 |
| WIPF1    | 0.824587 | 0.758756 | 0.89613  | 5.54E-06 |
| COX7A2L  | 0.81864  | 0.73629  | 0.910199 | 0.000216 |
| PNO1     | 1.078616 | 0.972862 | 1.195865 | 0.150606 |
| PLEK     | 0.963573 | 0.89937  | 1.032359 | 0.291538 |
| RND3     | 1.275746 | 1.153849 | 1.41052  | 2.01E-06 |
| ATF2     | 0.947126 | 0.879213 | 1.020286 | 0.152444 |
| THADA    | 1.034498 | 0.969372 | 1.104    | 0.306631 |
| AAK1     | 1.004304 | 0.932678 | 1.081431 | 0.909422 |
| TRAK2    | 1.070888 | 1.015317 | 1.1295   | 0.011767 |
| TIA1     | 1.047027 | 0.968389 | 1.132051 | 0.248662 |
| PCYOX1   | 1.079384 | 1.000128 | 1.16492  | 0.049617 |
| KISS1R   | 0.839441 | 0.727949 | 0.968009 | 0.016078 |
| EPAS1    | 0.94377  | 0.881808 | 1.010086 | 0.094855 |
| ARID3A   | 0.917714 | 0.85739  | 0.982282 | 0.013312 |
| SUMO1    | 0.978767 | 0.885331 | 1.082064 | 0.675029 |
| GRIN3B   | 1.029523 | 0.945108 | 1.121477 | 0.505051 |
| NFE2L2   | 0.953218 | 0.885773 | 1.025797 | 0.200657 |
| MSH6     | 0.966189 | 0.895299 | 1.042691 | 0.376319 |
| PLEKHA3  | 1.00442  | 0.931497 | 1.083052 | 0.9087   |
| SPR      | 1.310773 | 1.226163 | 1.401221 | 1.88E-15 |
| EPHA4    | 1.057594 | 0.983268 | 1.137539 | 0.132036 |
| PARD3B   | 1.113966 | 1.023673 | 1.212223 | 0.012333 |
| FARSB    | 1.111772 | 1.020936 | 1.210689 | 0.014833 |
| ALMS1    | 1.023344 | 0.960847 | 1.089905 | 0.472933 |
| BCL9     | 1.090917 | 1.026863 | 1.158967 | 0.004824 |
| DHCR24   | 1.146853 | 1.092937 | 1.20343  | 2.45E-08 |
| DNAJC16  | 1.04543  | 0.963679 | 1.134116 | 0.284879 |
| MORN1    | 1.084465 | 0.984697 | 1.194341 | 0.099603 |
| GPX7     | 0.881649 | 0.826627 | 0.940334 | 0.000128 |
| CACYBP   | 1.158404 | 1.03985  | 1.290475 | 0.0076   |
| SCP2     | 1.183323 | 1.078899 | 1.297855 | 0.000356 |
| TPSG1    | 0.690626 | 0.610761 | 0.780936 | 3.56E-09 |
| RALGPS2  | 0.996774 | 0.938293 | 1.0589   | 0.91658  |
| ANGPTL1  | 1.001969 | 0.938696 | 1.069508 | 0.952866 |
| FAM20B   | 1.07811  | 0.997214 | 1.165568 | 0.058778 |



|          |          |          |          |          |
|----------|----------|----------|----------|----------|
| TMEM59   | 1.10342  | 0.974905 | 1.248876 | 0.119307 |
| LRRRC42  | 0.97802  | 0.883943 | 1.082109 | 0.666679 |
| MRPL37   | 1.088782 | 0.969842 | 1.222308 | 0.149546 |
| ICMT     | 1.120084 | 1.057169 | 1.186744 | 0.000121 |
| RPL22    | 0.908792 | 0.833538 | 0.990841 | 0.030114 |
| CHD5     | 1.011068 | 0.935204 | 1.093085 | 0.782098 |
| QSOX1    | 1.040831 | 0.965704 | 1.121804 | 0.29511  |
| STXBP3   | 1.001061 | 0.922049 | 1.086843 | 0.979836 |
| PHF13    | 1.035708 | 0.972017 | 1.103572 | 0.278589 |
| ERRFI1   | 1.040578 | 0.950996 | 1.138597 | 0.386485 |
| PARK7    | 1.176073 | 1.056269 | 1.309466 | 0.00309  |
| AMPD2    | 0.976972 | 0.908093 | 1.051076 | 0.53227  |
| MECR     | 1.144623 | 1.050158 | 1.247585 | 0.002115 |
| KCNC4    | 1.097266 | 1.014954 | 1.186255 | 0.019646 |
| EDEM3    | 1.074607 | 1.013571 | 1.139318 | 0.015875 |
| WDR77    | 1.123966 | 1.033919 | 1.221856 | 0.006091 |
| RAP1A    | 0.964467 | 0.88139  | 1.055374 | 0.431138 |
| HDAC1    | 1.069247 | 0.966289 | 1.183174 | 0.194934 |
| CAPZA1   | 1.056663 | 0.982198 | 1.136774 | 0.13935  |
| S100PBP  | 1.003115 | 0.934691 | 1.076549 | 0.931235 |
| RNF19B   | 1.015553 | 0.947291 | 1.088734 | 0.663766 |
| SCAMP3   | 1.159947 | 1.041862 | 1.291416 | 0.006757 |
| TRIM62   | 1.16242  | 1.068302 | 1.26483  | 0.000476 |
| ASH1L    | 1.006503 | 0.942073 | 1.075338 | 0.847716 |
| DLGAP3   | 0.810822 | 0.737568 | 0.891352 | 1.42E-05 |
| SFPQ     | 0.922462 | 0.866532 | 0.982001 | 0.011435 |
| RHOA     | 1.17747  | 1.11943  | 1.238518 | 2.38E-10 |
| GON4L    | 0.985528 | 0.904324 | 1.074024 | 0.739688 |
| ARHGEF2  | 0.976414 | 0.905963 | 1.052343 | 0.532171 |
| MEF2D    | 0.94305  | 0.876192 | 1.015008 | 0.118075 |
| DOCK7    | 1.009844 | 0.93205  | 1.094132 | 0.810711 |
| SRM      | 1.01001  | 0.951403 | 1.072227 | 0.743989 |
| DLEU2L   | 1.079261 | 0.948375 | 1.228211 | 0.247525 |
| FBXO6    | 1.137731 | 1.045207 | 1.238446 | 0.002867 |
| MAD2L2   | 1.221025 | 1.101146 | 1.353956 | 0.000152 |
| DNAJC6   | 1.081741 | 1.031333 | 1.134613 | 0.00125  |
| LEPR     | 1.095161 | 1.023266 | 1.172109 | 0.008695 |
| IVNS1ABP | 1.060295 | 1.003026 | 1.120834 | 0.03877  |
| KIAA2013 | 1.039404 | 0.965807 | 1.118609 | 0.302336 |
| MFN2     | 0.94201  | 0.877487 | 1.011277 | 0.098903 |
| PRG4     | 1.148272 | 0.970677 | 1.358359 | 0.106788 |
| MIIP     | 1.089609 | 0.990204 | 1.198993 | 0.078702 |
| SMG7     | 0.963532 | 0.879133 | 1.056033 | 0.42703  |
| NCF2     | 1.043333 | 0.994419 | 1.094652 | 0.083357 |
| PDC      | 1.045016 | 0.943921 | 1.156938 | 0.396322 |
| SLC35D1  | 1.034749 | 0.966648 | 1.107648 | 0.325404 |
| PLA2G4A  | 1.106359 | 1.049896 | 1.165857 | 0.000156 |
| GADD45A  | 0.954582 | 0.895076 | 1.018044 | 0.156948 |
| PRDM2    | 0.89141  | 0.838863 | 0.94725  | 0.000209 |
| RGS2     | 0.991248 | 0.940035 | 1.045251 | 0.745345 |
| UCHL5    | 1.094591 | 0.995984 | 1.202961 | 0.060597 |
| BCAS2    | 0.926529 | 0.848151 | 1.012149 | 0.090613 |
| CTH      | 1.021311 | 0.957965 | 1.088846 | 0.518627 |
| AGMAT    | 1.119014 | 1.024184 | 1.222623 | 0.012815 |
| OLFML3   | 1.010589 | 0.916842 | 1.113921 | 0.832066 |
| PLEKHM2  | 0.886205 | 0.824458 | 0.952575 | 0.001044 |
| CRYZ     | 1.119876 | 1.041806 | 1.203797 | 0.002135 |
| PHTF1    | 1.009889 | 0.948141 | 1.075659 | 0.759833 |

|         |          |          |          |          |
|---------|----------|----------|----------|----------|
| ZBTB17  | 0.9218   | 0.852701 | 0.996499 | 0.040542 |
| CD58    | 0.961678 | 0.896426 | 1.031681 | 0.275727 |
| TFAP2E  | 1.027262 | 0.951879 | 1.108614 | 0.489134 |
| CD2     | 0.965309 | 0.910978 | 1.02288  | 0.23226  |
| TTF2    | 1.09452  | 1.007881 | 1.188607 | 0.03183  |
| NR5A2   | 0.998477 | 0.872663 | 1.142429 | 0.982301 |
| KIF21B  | 1.073798 | 1.009322 | 1.142394 | 0.024218 |
| TMEM9   | 1.2528   | 1.150749 | 1.363902 | 2.01E-07 |
| MAP7D1  | 0.870402 | 0.8016   | 0.945109 | 0.000954 |
| WARS2   | 0.984785 | 0.898359 | 1.079525 | 0.743547 |
| OSCP1   | 1.029225 | 0.949894 | 1.115182 | 0.481507 |
| MRPS15  | 1.00097  | 0.883168 | 1.134486 | 0.98789  |
| EXOC8   | 1.103756 | 1.019005 | 1.195555 | 0.015443 |
| GNPAT   | 1.094437 | 1.001796 | 1.195644 | 0.045529 |
| TSNAX   | 0.949793 | 0.878585 | 1.026772 | 0.195143 |
| RRAGC   | 1.012324 | 0.917009 | 1.117547 | 0.808184 |
| NID1    | 0.95121  | 0.917589 | 0.986062 | 0.006441 |
| LGALS8  | 1.015234 | 0.929888 | 1.108412 | 0.735769 |
| NT5C1A  | 0.995571 | 0.869297 | 1.140186 | 0.94885  |
| HPCAL4  | 1.002724 | 0.911496 | 1.103082 | 0.95543  |
| MTR     | 1.050521 | 0.986444 | 1.11876  | 0.124809 |
| BMP8B   | 1.263588 | 1.173917 | 1.360109 | 4.68E-10 |
| SIPA1L2 | 1.016764 | 0.974705 | 1.060637 | 0.440521 |
| RLF     | 0.930798 | 0.877291 | 0.987568 | 0.017591 |
| KMO     | 1.161021 | 1.037802 | 1.29887  | 0.009103 |
| ZNF684  | 1.269993 | 1.130299 | 1.426952 | 5.82E-05 |
| KCNQ4   | 1.244555 | 1.101315 | 1.406425 | 0.000453 |
| RIMS3   | 1.157847 | 1.087216 | 1.233066 | 5.02E-06 |
| AKT3    | 1.073059 | 1.013457 | 1.136167 | 0.015589 |
| ETV3    | 0.974214 | 0.915386 | 1.036824 | 0.41105  |
| ACADM   | 1.080977 | 1.00237  | 1.165748 | 0.043236 |
| SLAMF1  | 1.032625 | 0.970935 | 1.098235 | 0.307026 |
| CD48    | 0.933292 | 0.878222 | 0.991814 | 0.026091 |
| PADI2   | 1.02626  | 0.984142 | 1.07018  | 0.225388 |
| SDHB    | 1.117522 | 0.980416 | 1.273802 | 0.09615  |
| MFAP2   | 1.090404 | 0.978143 | 1.21555  | 0.118454 |
| RPF1    | 1.056395 | 0.946092 | 1.179557 | 0.329528 |
| KDM5B   | 0.937435 | 0.884734 | 0.993276 | 0.028634 |
| UAP1    | 1.030116 | 0.965613 | 1.098928 | 0.368464 |
| CTBS    | 1.108044 | 0.995091 | 1.233819 | 0.061448 |
| KLHL12  | 1.089787 | 0.998106 | 1.189889 | 0.055151 |
| SSX2IP  | 1.055994 | 0.990157 | 1.126208 | 0.097158 |
| ZNHIT6  | 1.071474 | 0.979375 | 1.172235 | 0.1322   |
| PLA2G2D | 1.040907 | 0.935981 | 1.157596 | 0.459565 |
| RBBP5   | 1.090788 | 1.001201 | 1.188391 | 0.046876 |
| GBP3    | 1.054656 | 0.981557 | 1.133199 | 0.146496 |
| GBP1    | 1.014237 | 0.962063 | 1.069241 | 0.599839 |
| KIF17   | 0.926995 | 0.866842 | 0.991323 | 0.026791 |
| GPR89A  | 1.058623 | 0.963018 | 1.16372  | 0.238138 |
| CD160   | 1.017846 | 0.930564 | 1.113315 | 0.69898  |
| ECE1    | 1.074875 | 1.022681 | 1.129732 | 0.004469 |
| HMGCL   | 1.032629 | 0.94456  | 1.128909 | 0.480226 |
| GALE    | 1.034787 | 0.950704 | 1.126307 | 0.42904  |
| ID3     | 0.999894 | 0.946378 | 1.056436 | 0.99699  |
| CR2     | 1.043954 | 0.948107 | 1.149491 | 0.381328 |
| CD46    | 0.995564 | 0.921768 | 1.075268 | 0.909912 |
| PRPF3   | 1.042645 | 0.965122 | 1.126394 | 0.289423 |
| APH1A   | 0.996243 | 0.910686 | 1.089837 | 0.934514 |

|          |          |          |          |          |
|----------|----------|----------|----------|----------|
| SLC2A1   | 1.056349 | 1.003136 | 1.112384 | 0.037646 |
| EBNA1BP2 | 1.145204 | 1.059012 | 1.23841  | 0.000683 |
| CDC20    | 1.110964 | 1.043725 | 1.182535 | 0.000955 |
| MPL      | 0.938803 | 0.896828 | 0.982743 | 0.006813 |
| ARTN     | 1.057321 | 1.005789 | 1.111493 | 0.028787 |
| IPO13    | 1.113957 | 1.038251 | 1.195182 | 0.002653 |
| ATP6V0B  | 0.987819 | 0.887976 | 1.098888 | 0.821641 |
| B4GALT2  | 0.988435 | 0.911853 | 1.071448 | 0.77739  |
| ERI3     | 1.136984 | 1.033973 | 1.250259 | 0.008063 |
| PTCH2    | 1.110743 | 1.010428 | 1.221016 | 0.029647 |
| AKR1A1   | 1.131881 | 1.038306 | 1.23389  | 0.004897 |
| PRDX1    | 1.183075 | 1.110219 | 1.260711 | 2.17E-07 |
| PIK3R3   | 1.333295 | 1.222598 | 1.454014 | 7.79E-11 |
| BLZF1    | 0.982183 | 0.914578 | 1.054785 | 0.621249 |
| SLC19A2  | 0.975222 | 0.903226 | 1.052957 | 0.521391 |
| FAAH     | 1.089053 | 1.032338 | 1.148885 | 0.00177  |
| NSUN4    | 0.972335 | 0.88184  | 1.072118 | 0.573535 |
| TMED5    | 0.92364  | 0.849402 | 1.004366 | 0.063161 |
| DR1      | 1.049362 | 0.960965 | 1.14589  | 0.283207 |
| CNN3     | 1.16569  | 1.092574 | 1.243699 | 3.50E-06 |
| F3       | 1.12419  | 1.070603 | 1.180458 | 2.63E-06 |
| ABCD3    | 1.03538  | 0.953311 | 1.124514 | 0.409276 |
| VAMP4    | 0.999628 | 0.902339 | 1.107407 | 0.994321 |
| DPH5     | 0.850184 | 0.770643 | 0.937936 | 0.001202 |
| FASLG    | 1.097173 | 0.980782 | 1.227376 | 0.105059 |
| PTBP2    | 0.954742 | 0.896432 | 1.016845 | 0.149745 |
| TNFSF4   | 1.070966 | 1.010823 | 1.134688 | 0.020072 |
| PRDX6    | 1.058934 | 0.947238 | 1.183802 | 0.313997 |
| DARS2    | 1.003872 | 0.939121 | 1.073088 | 0.909547 |
| IRF6     | 1.19212  | 1.08542  | 1.309309 | 0.000239 |
| RCAN3    | 1.083498 | 1.008419 | 1.164166 | 0.028612 |
| SYF2     | 0.876556 | 0.791102 | 0.971239 | 0.011816 |
| SLC35A3  | 1.075896 | 0.969193 | 1.194347 | 0.169827 |
| RCOR3    | 0.976426 | 0.900604 | 1.058631 | 0.562962 |
| STMN1    | 1.055072 | 0.986385 | 1.128543 | 0.118565 |
| MAN1C1   | 1.105264 | 1.028283 | 1.188009 | 0.006585 |
| NEK2     | 1.143829 | 1.068902 | 1.224008 | 0.000101 |
| RPS6KA1  | 1.220708 | 1.137041 | 1.310532 | 3.69E-08 |
| DHDDS    | 1.045409 | 0.95131  | 1.148815 | 0.356127 |
| NENF     | 1.049312 | 0.965063 | 1.140915 | 0.259658 |
| NSL1     | 1.047344 | 0.944631 | 1.161224 | 0.379748 |
| ARID1A   | 0.965164 | 0.887642 | 1.049456 | 0.406536 |
| CENPF    | 1.111886 | 1.051766 | 1.175442 | 0.000184 |
| RPA2     | 1.10536  | 1.005851 | 1.214714 | 0.037418 |
| PPP1R8   | 1.071856 | 0.982089 | 1.169828 | 0.119952 |
| STX12    | 0.944192 | 0.870191 | 1.024485 | 0.16788  |
| SLC5A9   | 1.250717 | 1.12509  | 1.390371 | 3.44E-05 |
| OSBPL9   | 0.908357 | 0.851122 | 0.96944  | 0.003796 |
| TXNDC12  | 1.055281 | 0.931543 | 1.195455 | 0.397793 |
| RCN2     | 0.97777  | 0.889601 | 1.074678 | 0.64104  |
| MUC5B    | 1.024879 | 0.900013 | 1.167068 | 0.71084  |
| CTSD     | 1.197449 | 1.118689 | 1.281753 | 2.09E-07 |
| STAG1    | 0.974374 | 0.902639 | 1.05181  | 0.505833 |
| STK11    | 1.043357 | 0.961724 | 1.131919 | 0.30722  |
| MMP8     | 1.030088 | 1.002996 | 1.057912 | 0.029264 |
| APOA1    | 1.210073 | 1.112466 | 1.316243 | 8.84E-06 |
| KPTN     | 1.078229 | 0.993238 | 1.170493 | 0.072178 |
| RPS25    | 0.945908 | 0.881018 | 1.015577 | 0.125109 |

|          |          |          |          |          |
|----------|----------|----------|----------|----------|
| KIF14    | 1.078417 | 1.00314  | 1.159344 | 0.040868 |
| DDX59    | 1.004501 | 0.912528 | 1.105743 | 0.926974 |
| ATF6     | 0.9599   | 0.889828 | 1.03549  | 0.289961 |
| CRYGD    | 1.055934 | 1.008593 | 1.105499 | 0.020043 |
| MREG     | 0.933584 | 0.87589  | 0.995078 | 0.034722 |
| FASTKD2  | 1.084799 | 0.987868 | 1.191241 | 0.08831  |
| NRP2     | 0.861306 | 0.773698 | 0.958834 | 0.006371 |
| CREB1    | 1.096798 | 1.002481 | 1.199989 | 0.044013 |
| KLF7     | 0.929969 | 0.86663  | 0.997938 | 0.043661 |
| B4GALT6  | 0.967693 | 0.918676 | 1.019326 | 0.215629 |
| CA14     | 1.036112 | 0.973606 | 1.102632 | 0.263813 |
| SPCS2    | 1.062194 | 0.977735 | 1.153948 | 0.15349  |
| USP35    | 0.891914 | 0.836421 | 0.951089 | 0.000483 |
| CASP8AP2 | 1.08989  | 1.014575 | 1.170796 | 0.018472 |
| HMG3     | 0.916717 | 0.859644 | 0.977579 | 0.008016 |
| ANKRD13C | 1.013801 | 0.929387 | 1.105882 | 0.757316 |
| PHF3     | 0.937848 | 0.877676 | 1.002145 | 0.057876 |
| PLAGL1   | 0.877852 | 0.823352 | 0.935961 | 6.78E-05 |
| FBXO30   | 0.968254 | 0.904347 | 1.036679 | 0.354447 |
| TNFAIP3  | 0.986245 | 0.933745 | 1.041697 | 0.619706 |
| AKAP7    | 1.18542  | 1.099128 | 1.278487 | 1.03E-05 |
| RAB32    | 0.897419 | 0.853493 | 0.943605 | 2.37E-05 |
| MYB      | 1.014194 | 0.955071 | 1.076978 | 0.645568 |
| ALDH8A1  | 1.048118 | 0.981302 | 1.119483 | 0.16201  |
| SGK1     | 1.023467 | 0.973367 | 1.076146 | 0.36503  |
| RNF146   | 0.989036 | 0.921152 | 1.061923 | 0.761223 |
| ARG1     | 0.99395  | 0.954036 | 1.035533 | 0.771655 |
| PMFBP1   | 0.966404 | 0.879366 | 1.062057 | 0.47792  |
| FBXL5    | 1.021963 | 0.942516 | 1.108107 | 0.598774 |
| MED28    | 0.972834 | 0.904356 | 1.046498 | 0.459573 |
| SLC16A7  | 1.011038 | 0.943213 | 1.08374  | 0.756687 |
| ZNF430   | 0.989934 | 0.918994 | 1.066351 | 0.789728 |
| VAMP8    | 1.003223 | 0.933496 | 1.078158 | 0.930236 |
| DCLRE1B  | 1.091479 | 0.990728 | 1.202476 | 0.076488 |
| FOXO3    | 0.908221 | 0.856707 | 0.962832 | 0.001232 |
| ARMC2    | 1.073967 | 0.96241  | 1.198456 | 0.202219 |
| GHRH     | 0.965804 | 0.867368 | 1.075412 | 0.525827 |
| RPN2     | 1.075221 | 0.978227 | 1.181833 | 0.132688 |
| TGIF2    | 0.9345   | 0.870056 | 1.003717 | 0.06314  |
| OLFM3    | 1.0933   | 1.009285 | 1.184309 | 0.028779 |
| PKD2     | 1.019037 | 0.959238 | 1.082563 | 0.541073 |
| ABCG2    | 1.08777  | 1.010967 | 1.170408 | 0.024327 |
| SPP1     | 1.01472  | 0.953182 | 1.080231 | 0.6471   |
| STBD1    | 1.153606 | 1.01318  | 1.313494 | 0.030952 |
| CCNI     | 0.869795 | 0.793703 | 0.953182 | 0.002822 |
| RARRES1  | 1.015404 | 0.919571 | 1.121224 | 0.76248  |
| MFSD1    | 0.991585 | 0.928929 | 1.058466 | 0.799679 |
| RAB3GAP2 | 1.036532 | 0.962902 | 1.115793 | 0.339876 |
| PPL      | 0.896905 | 0.841265 | 0.956224 | 0.000869 |
| UBN1     | 0.902528 | 0.838092 | 0.971917 | 0.006654 |
| KLF12    | 1.083628 | 1.027162 | 1.143197 | 0.003266 |
| UCHL3    | 1.153123 | 1.047494 | 1.269405 | 0.003654 |
| HS1BP3   | 1.051033 | 0.950465 | 1.162242 | 0.332075 |
| WDR35    | 1.073731 | 1.006401 | 1.145565 | 0.031313 |
| CCND2    | 0.923729 | 0.884715 | 0.964464 | 0.000314 |
| ELL2     | 0.993372 | 0.947359 | 1.04162  | 0.783456 |
| CYP20A1  | 1.096746 | 1.002943 | 1.199323 | 0.042932 |
| NDUFB3   | 1.157858 | 1.064507 | 1.259394 | 0.000632 |

|          |          |          |          |          |
|----------|----------|----------|----------|----------|
| GTF3C3   | 0.9742   | 0.89462  | 1.06086  | 0.547728 |
| SATB2    | 1.175571 | 1.084689 | 1.274068 | 8.14E-05 |
| UBE2B    | 0.965001 | 0.889411 | 1.047015 | 0.391982 |
| TRPM6    | 1.053982 | 0.97296  | 1.141751 | 0.197654 |
| KLF9     | 0.963366 | 0.919157 | 1.009702 | 0.119437 |
| TJP2     | 1.32089  | 1.179199 | 1.479607 | 1.53E-06 |
| ITGB1BP1 | 1.167165 | 1.045379 | 1.303138 | 0.005973 |
| CPSF3    | 1.000722 | 0.911727 | 1.098404 | 0.987882 |
| PIGZ     | 0.939933 | 0.854992 | 1.033312 | 0.199887 |
| SENP5    | 0.972794 | 0.91406  | 1.035301 | 0.385331 |
| CCDC92   | 1.101876 | 1.013498 | 1.197961 | 0.022949 |
| HEATR1   | 1.00247  | 0.937014 | 1.072499 | 0.942909 |
| RAD23B   | 0.859134 | 0.792528 | 0.931338 | 0.000226 |
| FKBP15   | 0.991133 | 0.922321 | 1.065079 | 0.808317 |
| CTNNA1   | 0.941945 | 0.883662 | 1.004073 | 0.066469 |
| SET      | 1.018114 | 0.92865  | 1.116197 | 0.702048 |
| GLE1     | 1.118585 | 1.028532 | 1.216522 | 0.008873 |
| RAB14    | 0.976716 | 0.896947 | 1.063578 | 0.587832 |
| TRIM32   | 1.133167 | 1.061433 | 1.20975  | 0.000179 |
| FBXW2    | 0.98139  | 0.908949 | 1.059605 | 0.63112  |
| PHF19    | 0.877789 | 0.802538 | 0.960096 | 0.004365 |
| NEK6     | 1.059683 | 0.988721 | 1.135738 | 0.10117  |
| BSPRY    | 0.996342 | 0.940638 | 1.055345 | 0.900642 |
| PPP6C    | 0.954384 | 0.861787 | 1.056929 | 0.369906 |
| NDUFA8   | 1.127573 | 1.053166 | 1.207237 | 0.000566 |
| HDHD3    | 1.238497 | 1.132895 | 1.353944 | 2.55E-06 |
| RBM18    | 1.024237 | 0.929151 | 1.129053 | 0.629993 |
| SLC46A2  | 0.995669 | 0.902245 | 1.098766 | 0.931193 |
| HSDL2    | 1.069671 | 0.985446 | 1.161094 | 0.107487 |
| MAPKAP1  | 1.050378 | 0.966157 | 1.141941 | 0.249078 |
| NR4A3    | 0.96462  | 0.922719 | 1.008423 | 0.111887 |
| INVS     | 1.017723 | 0.941796 | 1.099771 | 0.656985 |
| GALNT12  | 1.35141  | 1.250097 | 1.460934 | 3.61E-14 |
| DENND1A  | 0.9282   | 0.863134 | 0.998172 | 0.044503 |
| ALG2     | 1.010903 | 0.929671 | 1.099234 | 0.799706 |
| CSF3R    | 0.849812 | 0.80658  | 0.895361 | 1.00E-09 |
| KDSR     | 0.993317 | 0.904449 | 1.090917 | 0.888477 |
| VPS4B    | 1.000779 | 0.91457  | 1.095115 | 0.986481 |
| ONECUT2  | 1.307067 | 1.205008 | 1.41777  | 1.08E-10 |
| ZBTB45   | 0.961594 | 0.872649 | 1.059604 | 0.429034 |
| YLPM1    | 0.974949 | 0.894866 | 1.062199 | 0.561816 |
| PROX2    | 1.037811 | 0.955801 | 1.126857 | 0.376891 |
| VSX2     | 0.977001 | 0.876369 | 1.08919  | 0.674832 |
| FCF1     | 0.998302 | 0.912837 | 1.091768 | 0.970304 |
| PGF      | 0.964065 | 0.890869 | 1.043275 | 0.363673 |
| IFI27L2  | 1.182883 | 1.113825 | 1.256222 | 4.44E-08 |
| NEK9     | 1.084387 | 1.013461 | 1.160277 | 0.018906 |
| ACYP1    | 1.2045   | 1.111612 | 1.30515  | 5.52E-06 |
| NPC2     | 0.977676 | 0.90407  | 1.057276 | 0.571854 |
| DNAL1    | 1.063393 | 0.951326 | 1.188661 | 0.279357 |
| ACOT2    | 1.148628 | 1.051323 | 1.254938 | 0.002154 |
| LTBP2    | 1.044251 | 0.934942 | 1.166341 | 0.442765 |
| MLH3     | 1.054707 | 0.983318 | 1.131277 | 0.136351 |
| TTLL5    | 1.040077 | 0.953196 | 1.134877 | 0.377285 |
| FLVCR2   | 1.069943 | 0.9984   | 1.146612 | 0.055541 |
| ABCD4    | 1.01338  | 0.93425  | 1.099213 | 0.748647 |
| DLST     | 0.88205  | 0.824915 | 0.943143 | 0.00024  |
| TGFB3    | 1.140044 | 1.024054 | 1.269172 | 0.016659 |

|         |          |          |          |          |
|---------|----------|----------|----------|----------|
| RBM25   | 0.978515 | 0.891155 | 1.074437 | 0.648959 |
| ALDH6A1 | 1.102238 | 1.020685 | 1.190307 | 0.013064 |
| GPR68   | 1.008806 | 0.93744  | 1.085606 | 0.814821 |
| EIF2B2  | 1.163333 | 1.0411   | 1.299917 | 0.00756  |
| COQ6    | 1.143837 | 1.008126 | 1.297816 | 0.037018 |
| ZNF410  | 0.986779 | 0.922942 | 1.055031 | 0.696506 |
| RHOQ    | 0.939638 | 0.869528 | 1.015401 | 0.115563 |
| GPR75   | 0.969355 | 0.898046 | 1.046325 | 0.42465  |
| SUPT7L  | 1.077389 | 0.9634   | 1.204865 | 0.191401 |
| KLHL29  | 1.05932  | 0.983303 | 1.141214 | 0.129322 |
| DNMT3A  | 1.040425 | 0.971436 | 1.114315 | 0.257596 |
| TMEM214 | 1.08156  | 0.987779 | 1.184245 | 0.090216 |
| ATAD2B  | 1.00126  | 0.942416 | 1.063778 | 0.967497 |
| FKBP1B  | 1.11277  | 1.01045  | 1.225452 | 0.029917 |
| ATL2    | 0.954147 | 0.887761 | 1.025498 | 0.202076 |
| YPEL5   | 0.953091 | 0.88192  | 1.030007 | 0.225009 |
| FAM98A  | 1.04215  | 0.951687 | 1.141212 | 0.37286  |
| YIPF4   | 1.019535 | 0.947825 | 1.096669 | 0.603124 |
| AFTPH   | 0.9753   | 0.902198 | 1.054326 | 0.529242 |
| CNRIP1  | 1.010381 | 0.964211 | 1.058762 | 0.665185 |
| BCL11A  | 1.108422 | 1.035527 | 1.186448 | 0.003019 |
| CRIP1   | 1.015552 | 0.945635 | 1.090638 | 0.671542 |
| EPCAM   | 0.952597 | 0.902311 | 1.005685 | 0.079244 |
| SLC17A5 | 1.00886  | 0.934121 | 1.08958  | 0.822271 |
| OGFRL1  | 0.945778 | 0.881998 | 1.01417  | 0.117589 |
| IDE     | 1.090693 | 0.997559 | 1.192521 | 0.05661  |
| ELOVL3  | 1.316907 | 1.201281 | 1.443663 | 4.33E-09 |
| IFIT3   | 1.061537 | 1.020015 | 1.104749 | 0.003352 |
| NKX2-3  | 1.080158 | 1.04929  | 1.111934 | 1.86E-07 |
| IFIT2   | 1.055745 | 1.009102 | 1.104544 | 0.018623 |
| GPAM    | 1.106473 | 1.006466 | 1.216416 | 0.036322 |
| CUTC    | 1.073255 | 0.965756 | 1.19272  | 0.189222 |
| CNNM1   | 1.240052 | 1.142457 | 1.345984 | 2.68E-07 |
| MXI1    | 0.97812  | 0.909563 | 1.051845 | 0.550723 |
| SMNDC1  | 0.973673 | 0.886337 | 1.069614 | 0.57792  |
| HELLS   | 1.109315 | 1.042691 | 1.180195 | 0.001028 |
| TCTN3   | 1.106799 | 1.009854 | 1.213051 | 0.030035 |
| AVPI1   | 1.059716 | 0.985662 | 1.139333 | 0.116595 |
| KCNIP2  | 1.097612 | 1.001485 | 1.202966 | 0.046404 |
| GOT1    | 1.21773  | 1.116429 | 1.328223 | 8.78E-06 |
| SFRP5   | 1.115787 | 1.052395 | 1.182998 | 0.000241 |
| GNA13   | 0.909968 | 0.849829 | 0.974363 | 0.006842 |
| HOXB8   | 1.069157 | 1.024438 | 1.115829 | 0.002158 |
| HOXB5   | 1.063853 | 1.032268 | 1.096404 | 5.69E-05 |
| HOXB3   | 1.053432 | 1.021004 | 1.086891 | 0.001103 |
| DUSP1   | 0.958341 | 0.904748 | 1.015109 | 0.147273 |
| PANK3   | 1.011017 | 0.941407 | 1.085774 | 0.76339  |
| TEK     | 1.110829 | 1.014579 | 1.21621  | 0.023029 |
| RCL1    | 1.100802 | 1.015861 | 1.192846 | 0.019075 |
| INSL6   | 1.053403 | 0.983988 | 1.127715 | 0.134692 |
| MLANA   | 0.9989   | 0.923984 | 1.079891 | 0.977928 |
| CD274   | 1.217984 | 1.118125 | 1.32676  | 6.24E-06 |
| NUP43   | 1.024728 | 0.963172 | 1.090219 | 0.439631 |
| MTHFD1L | 0.898469 | 0.840251 | 0.960721 | 0.001734 |
| PCMT1   | 1.073776 | 0.980086 | 1.176422 | 0.12648  |
| PLEKHG1 | 1.039953 | 0.976415 | 1.107626 | 0.223248 |
| MYCT1   | 1.157006 | 1.108348 | 1.2078   | 2.88E-11 |
| WDR55   | 1.132693 | 1.033429 | 1.241491 | 0.007752 |

|          |          |          |          |          |
|----------|----------|----------|----------|----------|
| ARAP3    | 0.993452 | 0.940905 | 1.048932 | 0.812691 |
| SLC25A2  | 1.086018 | 0.973368 | 1.211705 | 0.139716 |
| TNN      | 1.042254 | 0.951124 | 1.142115 | 0.375335 |
| MRPS14   | 1.21524  | 1.093292 | 1.350791 | 0.000303 |
| CENPL    | 1.00863  | 0.927628 | 1.096704 | 0.840567 |
| ACAT2    | 1.214019 | 1.090587 | 1.351422 | 0.000392 |
| TCP1     | 0.989149 | 0.898306 | 1.08918  | 0.82434  |
| SNX19    | 1.052255 | 0.976408 | 1.133993 | 0.182049 |
| KCNJ5    | 0.868368 | 0.742121 | 1.016093 | 0.078272 |
| ARR3     | 0.969708 | 0.884733 | 1.062845 | 0.510932 |
| PDZD11   | 1.186162 | 1.064955 | 1.321163 | 0.001907 |
| SLC10A7  | 0.993788 | 0.912896 | 1.081848 | 0.885618 |
| NUDCD1   | 1.072467 | 0.98571  | 1.166861 | 0.104046 |
| ENY2     | 0.950592 | 0.858686 | 1.052334 | 0.328713 |
| MASTL    | 0.945512 | 0.874185 | 1.022659 | 0.161495 |
| KIAA1217 | 1.088111 | 1.033093 | 1.146059 | 0.001424 |
| PLXDC2   | 1.039435 | 0.992518 | 1.088569 | 0.100743 |
| EPC1     | 0.99538  | 0.907855 | 1.091344 | 0.921456 |
| IQSEC3   | 1.000688 | 0.942672 | 1.062275 | 0.981992 |
| CCDC77   | 1.007618 | 0.915744 | 1.108709 | 0.876369 |
| TAF12    | 0.985055 | 0.877307 | 1.106036 | 0.798901 |
| MTRF1    | 1.044108 | 0.951678 | 1.145516 | 0.361406 |
| DNAJC15  | 1.110455 | 1.002356 | 1.23021  | 0.044962 |
| UFM1     | 0.971335 | 0.895472 | 1.053624 | 0.483316 |
| WBP4     | 0.94068  | 0.843668 | 1.048848 | 0.270825 |
| ELF1     | 0.876525 | 0.817644 | 0.939646 | 0.000204 |
| SMAD9    | 1.092024 | 0.94871  | 1.256988 | 0.220032 |
| HSPH1    | 1.06859  | 1.011822 | 1.128543 | 0.017221 |
| KBTBD7   | 1.079258 | 1.002526 | 1.161863 | 0.04266  |
| ALG5     | 1.078095 | 0.960136 | 1.210545 | 0.203413 |
| EXOSC8   | 1.082468 | 0.970818 | 1.206959 | 0.153653 |
| ETF1     | 0.879649 | 0.820897 | 0.942606 | 0.000277 |
| TGFBI    | 1.030866 | 0.990211 | 1.07319  | 0.138661 |
| FAM53C   | 0.854055 | 0.799651 | 0.91216  | 2.63E-06 |
| SIL1     | 0.992607 | 0.903232 | 1.090826 | 0.8775   |
| PAIP2    | 0.952861 | 0.859617 | 1.056219 | 0.358102 |
| MYOT     | 1.065591 | 0.982893 | 1.155246 | 0.123236 |
| KDM3B    | 0.962464 | 0.892125 | 1.038349 | 0.323121 |
| EGR1     | 0.987856 | 0.949461 | 1.027804 | 0.545783 |
| SERP1    | 0.892574 | 0.798426 | 0.997823 | 0.045686 |
| PLS1     | 1.309254 | 1.216475 | 1.409109 | 6.70E-13 |
| ZFP30    | 0.948311 | 0.874839 | 1.027953 | 0.197084 |
| NR2C1    | 0.948145 | 0.872461 | 1.030395 | 0.20965  |
| UTP20    | 1.046833 | 0.974563 | 1.124462 | 0.209837 |
| TMPO     | 1.072542 | 0.997425 | 1.153315 | 0.058707 |
| ARL1     | 1.124371 | 1.023393 | 1.235312 | 0.014623 |
| GLT8D2   | 1.048805 | 0.929051 | 1.183996 | 0.441111 |
| SOCS2    | 1.169272 | 1.130858 | 1.208991 | 4.50E-20 |
| NFYB     | 1.102712 | 0.994209 | 1.223055 | 0.064303 |
| APAF1    | 1.050423 | 0.987753 | 1.11707  | 0.117036 |
| DUSP4    | 1.086412 | 1.031714 | 1.144009 | 0.001663 |
| CLU      | 1.049547 | 1.012626 | 1.087813 | 0.008129 |
| TNFRSF10 | 0.939947 | 0.8806   | 1.003295 | 0.062729 |
| SORBS3   | 1.042174 | 0.972484 | 1.116859 | 0.242071 |
| PTK2B    | 0.994028 | 0.924979 | 1.068231 | 0.870459 |
| CHRNA2   | 0.974721 | 0.898218 | 1.05774  | 0.539253 |
| PPP3CC   | 0.985894 | 0.903481 | 1.075826 | 0.749758 |
| PDLIM2   | 1.291383 | 1.18345  | 1.409159 | 9.34E-09 |

|          |          |          |          |          |
|----------|----------|----------|----------|----------|
| EPHX2    | 1.180171 | 1.10695  | 1.258237 | 4.00E-07 |
| RNF170   | 1.080715 | 0.992485 | 1.176788 | 0.074039 |
| NPPB     | 0.977165 | 0.901067 | 1.05969  | 0.576554 |
| UBIAD1   | 1.160213 | 1.051012 | 1.28076  | 0.003214 |
| TARDBP   | 0.993806 | 0.923137 | 1.069885 | 0.868874 |
| TNFRSF8  | 1.052234 | 0.93708  | 1.181539 | 0.389234 |
| ZNF706   | 0.990942 | 0.906896 | 1.082776 | 0.840515 |
| LYPLA1   | 0.939802 | 0.863529 | 1.022812 | 0.150531 |
| CRISPLD1 | 1.087092 | 1.017324 | 1.161645 | 0.013607 |
| COPS5    | 1.11454  | 0.998813 | 1.243676 | 0.052535 |
| RDH10    | 1.289828 | 1.185508 | 1.403328 | 3.33E-09 |
| EPX      | 0.916201 | 0.891776 | 0.941295 | 2.18E-10 |
| AKAP1    | 1.158103 | 1.084744 | 1.236422 | 1.10E-05 |
| COIL     | 1.130848 | 1.035876 | 1.234527 | 0.006005 |
| TRIM25   | 1.114253 | 1.036821 | 1.197469 | 0.003241 |
| SCPEP1   | 1.071994 | 1.021936 | 1.124504 | 0.004382 |
| SPOP     | 1.088095 | 0.99443  | 1.190582 | 0.066012 |
| SLC35B1  | 1.070109 | 0.958935 | 1.194172 | 0.226001 |
| TEX14    | 0.965552 | 0.912486 | 1.021703 | 0.224181 |
| FAM117A  | 0.933004 | 0.869021 | 1.001698 | 0.055726 |
| NCAPH    | 1.105471 | 1.027198 | 1.189709 | 0.007448 |
| MND1     | 1.24241  | 1.09974  | 1.40359  | 0.000487 |
| TRIM6    | 0.962825 | 0.886516 | 1.045702 | 0.368536 |
| ADCY7    | 1.141811 | 1.083466 | 1.203297 | 7.21E-07 |
| TSHZ3    | 1.018352 | 0.943954 | 1.098614 | 0.638474 |
| ECHDC2   | 1.047439 | 0.97629  | 1.123773 | 0.196573 |
| TAS2R10  | 1.130524 | 1.013495 | 1.261065 | 0.027779 |
| PRB2     | 0.985988 | 0.86731  | 1.120906 | 0.829259 |
| PYROXD1  | 1.002018 | 0.910989 | 1.102143 | 0.966907 |
| PSPC1    | 0.981027 | 0.912192 | 1.055056 | 0.605804 |
| ZNF549   | 1.052438 | 0.962758 | 1.150472 | 0.260699 |
| A1BG     | 0.882767 | 0.792607 | 0.983182 | 0.023297 |
| ZSCAN18  | 0.982643 | 0.918151 | 1.051666 | 0.613192 |
| ZNF211   | 1.161181 | 1.062337 | 1.269221 | 0.000994 |
| PDZRN3   | 1.066102 | 0.962159 | 1.181274 | 0.221353 |
| LHX4     | 1.095141 | 1.006385 | 1.191724 | 0.035068 |
| RNF2     | 1.054005 | 0.963764 | 1.152696 | 0.249426 |
| SEC22A   | 1.176304 | 1.062613 | 1.30216  | 0.001742 |
| CSTA     | 0.982808 | 0.944657 | 1.022499 | 0.390615 |
| DPPA4    | 1.149913 | 1.099084 | 1.203094 | 1.40E-09 |
| POPDC2   | 1.179742 | 1.044817 | 1.33209  | 0.007643 |
| B4GALT4  | 0.966247 | 0.889278 | 1.049879 | 0.417542 |
| CD80     | 1.095136 | 1.004534 | 1.19391  | 0.039146 |
| KIF18A   | 1.049063 | 0.980337 | 1.122608 | 0.165897 |
| MAPK8IP1 | 0.985652 | 0.918026 | 1.05826  | 0.690255 |
| CRY2     | 0.987273 | 0.919784 | 1.059714 | 0.722934 |
| PEX16    | 1.109506 | 0.992019 | 1.240908 | 0.068812 |
| DEPDC7   | 0.805013 | 0.753465 | 0.860087 | 1.33E-10 |
| CAT      | 1.083872 | 1.021948 | 1.149547 | 0.00729  |
| PILRB    | 0.960523 | 0.899543 | 1.025637 | 0.22876  |
| ZMYM2    | 0.916877 | 0.859058 | 0.978588 | 0.009021 |
| GJB6     | 1.074841 | 1.013044 | 1.140409 | 0.016898 |
| TBC1D15  | 0.945412 | 0.876928 | 1.019245 | 0.143435 |
| HCRTR1   | 0.992865 | 0.931473 | 1.058304 | 0.825975 |
| ZCCHC17  | 1.06654  | 0.965396 | 1.17828  | 0.205082 |
| FABP3    | 0.978459 | 0.912044 | 1.04971  | 0.543707 |
| KHDRBS1  | 0.931298 | 0.851788 | 1.018229 | 0.118002 |
| TMEM39B  | 0.984424 | 0.896285 | 1.08123  | 0.742885 |



|          |          |          |          |          |
|----------|----------|----------|----------|----------|
| CCRL2    | 1.072723 | 0.992937 | 1.158921 | 0.075039 |
| CCR2     | 1.031509 | 0.987047 | 1.077973 | 0.167589 |
| POLR3GL  | 1.105131 | 1.005545 | 1.214581 | 0.038012 |
| TNFSF10  | 1.118891 | 1.060812 | 1.18015  | 3.62E-05 |
| ZNF639   | 0.937266 | 0.863996 | 1.01675  | 0.11876  |
| PIK3CA   | 0.922755 | 0.864701 | 0.984708 | 0.015318 |
| PDS5A    | 0.996037 | 0.922673 | 1.075233 | 0.918969 |
| TMEM156  | 0.844045 | 0.780082 | 0.913253 | 2.48E-05 |
| LIAS     | 1.076895 | 0.943468 | 1.229192 | 0.272334 |
| ZSCAN20  | 1.294747 | 1.170517 | 1.432161 | 5.19E-07 |
| CLCC1    | 0.919184 | 0.855453 | 0.987663 | 0.021529 |
| GPSM2    | 0.935598 | 0.862725 | 1.014627 | 0.107617 |
| GTDC1    | 1.041746 | 0.942716 | 1.151178 | 0.422274 |
| CXCR4    | 1.005733 | 0.947726 | 1.067289 | 0.850408 |
| ZRANB3   | 0.998036 | 0.917321 | 1.085854 | 0.96356  |
| ACVR2A   | 1.219958 | 1.103331 | 1.348913 | 0.000105 |
| POLK     | 0.975542 | 0.902261 | 1.054776 | 0.534281 |
| FLT3     | 0.956324 | 0.921558 | 0.992402 | 0.018096 |
| RPL21    | 0.872591 | 0.798828 | 0.953164 | 0.002491 |
| MTIF3    | 0.982532 | 0.892661 | 1.081452 | 0.718809 |
| GTF3A    | 0.987052 | 0.893021 | 1.090983 | 0.798604 |
| RASL11A  | 0.972278 | 0.890458 | 1.061615 | 0.530765 |
| UBL3     | 0.974599 | 0.898026 | 1.057701 | 0.537711 |
| FYTTD1   | 1.017479 | 0.927917 | 1.115687 | 0.71243  |
| XPNPEP2  | 0.790984 | 0.700697 | 0.892905 | 0.00015  |
| SASH3    | 1.053672 | 0.980598 | 1.132192 | 0.153962 |
| OCRL     | 0.980029 | 0.912065 | 1.053058 | 0.582227 |
| MRPS2    | 1.017239 | 0.925865 | 1.117631 | 0.721894 |
| FMOD     | 1.145805 | 1.020808 | 1.286107 | 0.020921 |
| LAX1     | 0.917511 | 0.866032 | 0.972051 | 0.003477 |
| KIAA1191 | 1.057138 | 0.955939 | 1.169049 | 0.279129 |
| COPA     | 0.983192 | 0.913526 | 1.05817  | 0.651218 |
| CD244    | 0.914934 | 0.869006 | 0.963289 | 0.000716 |
| LY9      | 0.854606 | 0.795315 | 0.918317 | 1.85E-05 |
| HS3ST2   | 1.238705 | 1.023843 | 1.498658 | 0.027638 |
| RBBP6    | 0.965513 | 0.889542 | 1.047971 | 0.401268 |
| ZC3H7A   | 0.951651 | 0.876699 | 1.033011 | 0.236412 |
| SERAC1   | 1.112485 | 1.011776 | 1.223219 | 0.027682 |
| ANXA11   | 0.879596 | 0.803214 | 0.963243 | 0.005641 |
| ZNF205   | 1.15254  | 1.050908 | 1.264001 | 0.002577 |
| RPL5     | 0.85674  | 0.788121 | 0.931334 | 0.000283 |
| ODF2L    | 0.944016 | 0.871894 | 1.022104 | 0.155381 |
| SPATA1   | 1.079007 | 0.976859 | 1.191838 | 0.133988 |
| LRRRC39  | 1.077537 | 0.968089 | 1.199358 | 0.171779 |
| RWDD3    | 1.222148 | 1.096304 | 1.362437 | 0.000297 |
| ZNF644   | 0.96494  | 0.912042 | 1.020907 | 0.214731 |
| CCDC18   | 0.997605 | 0.922452 | 1.078881 | 0.952147 |
| RPAP2    | 1.006452 | 0.922175 | 1.098431 | 0.885395 |
| BBS9     | 1.023274 | 0.946559 | 1.106205 | 0.562834 |
| PMS2     | 0.9936   | 0.908331 | 1.086874 | 0.888462 |
| ZMIZ2    | 0.969993 | 0.884953 | 1.063205 | 0.51518  |
| OCM      | 1.165899 | 1.050881 | 1.293506 | 0.003774 |
| EEPD1    | 1.046557 | 0.977769 | 1.120186 | 0.18957  |
| KIAA0087 | 1.207748 | 1.12515  | 1.296411 | 1.77E-07 |
| KLHL7    | 0.956934 | 0.848064 | 1.079779 | 0.475001 |
| HERPUD2  | 0.859597 | 0.791844 | 0.933148 | 0.000304 |
| CBX3     | 1.040933 | 0.939899 | 1.152829 | 0.441234 |
| HNRNPA2  | 0.979792 | 0.899554 | 1.067187 | 0.639567 |

|          |          |          |          |          |
|----------|----------|----------|----------|----------|
| WIPF3    | 0.826281 | 0.745678 | 0.915597 | 0.000269 |
| NPY      | 1.110438 | 1.024986 | 1.203015 | 0.010347 |
| FAM126A  | 1.042001 | 0.960498 | 1.13042  | 0.322131 |
| HOXA7    | 1.180284 | 1.129752 | 1.233076 | 1.13E-13 |
| INHBA    | 1.031885 | 0.977822 | 1.088937 | 0.252983 |
| FKBP9    | 1.050934 | 0.98238  | 1.124272 | 0.148892 |
| ARL4A    | 1.008798 | 0.94259  | 1.079656 | 0.800336 |
| POLM     | 1.050288 | 0.970517 | 1.136617 | 0.223445 |
| RAMP3    | 1.234197 | 1.129075 | 1.349107 | 3.61E-06 |
| TWIST1   | 0.947669 | 0.87545  | 1.025845 | 0.183838 |
| SMU1     | 0.993649 | 0.912131 | 1.082453 | 0.884022 |
| GLIPR2   | 1.054003 | 0.997918 | 1.11324  | 0.059393 |
| CLTA     | 1.067347 | 0.939042 | 1.213182 | 0.318552 |
| RECK     | 1.398945 | 1.309376 | 1.494642 | 2.67E-23 |
| SPINK4   | 0.923973 | 0.874267 | 0.976505 | 0.005068 |
| ACO1     | 1.011235 | 0.931685 | 1.097576 | 0.789273 |
| DCAF10   | 1.088634 | 0.999469 | 1.185753 | 0.051442 |
| KIAA1549 | 0.809021 | 0.75832  | 0.863111 | 1.38E-10 |
| TRIM24   | 0.91553  | 0.854679 | 0.980713 | 0.011905 |
| CALD1    | 1.17067  | 1.093597 | 1.253175 | 5.76E-06 |
| NUDT10   | 0.971136 | 0.900676 | 1.047108 | 0.44598  |
| NEUROG3  | 1.030508 | 0.935336 | 1.135363 | 0.543298 |
| PLAU     | 0.972633 | 0.923464 | 1.024419 | 0.294445 |
| SRGN     | 1.024721 | 0.976419 | 1.075412 | 0.321545 |
| BICC1    | 1.151885 | 1.052652 | 1.260473 | 0.002096 |
| CISD1    | 1.103771 | 0.993514 | 1.226263 | 0.065947 |
| EGR2     | 1.075272 | 1.009541 | 1.145283 | 0.024132 |
| ECD      | 0.930295 | 0.856138 | 1.010876 | 0.088241 |
| P4HA1    | 1.030783 | 0.951585 | 1.116573 | 0.45729  |
| SLC25A16 | 1.109896 | 1.011128 | 1.21831  | 0.028329 |
| ZWINT    | 1.165143 | 1.089739 | 1.245764 | 7.55E-06 |
| VPS26A   | 1.017511 | 0.931642 | 1.111296 | 0.699562 |
| RBM19    | 1.036486 | 0.95913  | 1.12008  | 0.365186 |
| CIT      | 1.135394 | 1.056849 | 1.219778 | 0.000517 |
| IFT81    | 1.076061 | 0.968059 | 1.196112 | 0.174328 |
| ACADS    | 0.921981 | 0.845019 | 1.005952 | 0.067771 |
| HVCN1    | 1.007737 | 0.948464 | 1.070715 | 0.80321  |
| NME2P1   | 0.962995 | 0.892623 | 1.038914 | 0.330092 |
| DDX54    | 1.002857 | 0.91897  | 1.094402 | 0.948957 |
| MED13L   | 0.952912 | 0.892294 | 1.017647 | 0.150347 |
| CDKN2C   | 1.120615 | 1.063284 | 1.181038 | 2.14E-05 |
| RNF11    | 0.887648 | 0.821135 | 0.959547 | 0.002708 |
| RASSF8   | 1.043214 | 0.96618  | 1.126391 | 0.279732 |
| ITPR2    | 0.912193 | 0.866901 | 0.959852 | 0.000405 |
| CCDC91   | 1.003897 | 0.931027 | 1.082471 | 0.919419 |
| NECAB1   | 1.170967 | 1.091236 | 1.256523 | 1.15E-05 |
| WWP1     | 1.02956  | 0.954533 | 1.110485 | 0.450488 |
| ACOT9    | 1.031943 | 0.944515 | 1.127464 | 0.486335 |
| PRDX4    | 1.124432 | 1.055002 | 1.198431 | 0.00031  |
| PKN1     | 0.905238 | 0.832934 | 0.983819 | 0.019075 |
| GIPC1    | 1.256941 | 1.161604 | 1.360103 | 1.33E-08 |
| EBPL     | 0.939917 | 0.872449 | 1.012604 | 0.103016 |
| ATP7B    | 1.065698 | 0.998476 | 1.137446 | 0.055608 |
| ZC3H13   | 0.988522 | 0.895007 | 1.091809 | 0.819902 |
| GUCY1B2  | 0.950901 | 0.863428 | 1.047236 | 0.306525 |
| NLN      | 1.084607 | 1.008535 | 1.166418 | 0.028596 |
| CENPK    | 1.091281 | 1.012747 | 1.175905 | 0.021885 |
| OPTN     | 1.130903 | 1.071977 | 1.193067 | 6.61E-06 |

|          |          |          |          |          |
|----------|----------|----------|----------|----------|
| ATF1     | 1.064492 | 0.96613  | 1.172869 | 0.206441 |
| TSFM     | 1.183828 | 1.026114 | 1.365783 | 0.020703 |
| ARHGAP9  | 1.070249 | 0.98176  | 1.166715 | 0.123101 |
| NCKAP1L  | 1.021597 | 0.949572 | 1.099086 | 0.566776 |
| MMP19    | 0.999521 | 0.933807 | 1.069859 | 0.988981 |
| PFDN5    | 1.062209 | 0.979881 | 1.151454 | 0.142594 |
| SPATS2   | 1.098066 | 1.009736 | 1.194123 | 0.028786 |
| ORMDL2   | 1.091544 | 0.979938 | 1.21586  | 0.111453 |
| NR4A1    | 0.939735 | 0.894996 | 0.98671  | 0.012506 |
| PDE1B    | 1.048129 | 0.982632 | 1.117991 | 0.153352 |
| CDK2     | 1.199885 | 1.09439  | 1.31555  | 0.000104 |
| LRP1     | 1.012141 | 0.975048 | 1.050644 | 0.52641  |
| NFE2     | 1.028299 | 0.974074 | 1.085543 | 0.312677 |
| IKZF4    | 1.091408 | 0.984374 | 1.210082 | 0.096733 |
| SMUG1    | 1.229269 | 1.117922 | 1.351707 | 2.04E-05 |
| TUBA1B   | 1.065903 | 0.992784 | 1.144407 | 0.07837  |
| KBTBD4   | 1.006538 | 0.915508 | 1.106619 | 0.892822 |
| SARDH    | 1.22165  | 1.142293 | 1.30652  | 5.15E-09 |
| DBH      | 1.233848 | 1.117567 | 1.362228 | 3.17E-05 |
| ATPAF1   | 1.2204   | 1.106746 | 1.345727 | 6.51E-05 |
| STIL     | 1.0674   | 0.990762 | 1.149967 | 0.086197 |
| HJURP    | 1.101539 | 1.041154 | 1.165426 | 0.000774 |
| COL10A1  | 1.075912 | 0.9945   | 1.163988 | 0.068368 |
| AMD1     | 0.982146 | 0.910925 | 1.058936 | 0.639045 |
| USP45    | 1.175112 | 1.091325 | 1.265331 | 1.91E-05 |
| MORF4L2  | 0.966307 | 0.887824 | 1.051729 | 0.427773 |
| RAB9B    | 1.388801 | 1.259535 | 1.531335 | 4.43E-11 |
| RAB9A    | 0.919626 | 0.829043 | 1.020107 | 0.113264 |
| METTL8   | 1.074747 | 0.989914 | 1.16685  | 0.085739 |
| TTC21B   | 1.015846 | 0.947543 | 1.089073 | 0.657978 |
| NMI      | 1.085884 | 0.980781 | 1.20225  | 0.112662 |
| TNFAIP6  | 1.041811 | 0.989908 | 1.096436 | 0.116198 |
| BAZ2B    | 1.006483 | 0.939327 | 1.078441 | 0.854473 |
| SLC36A1  | 1.042288 | 0.98159  | 1.10674  | 0.176059 |
| LPGAT1   | 0.912266 | 0.84822  | 0.981149 | 0.013421 |
| BATF3    | 1.240051 | 1.110309 | 1.384953 | 0.000136 |
| G0S2     | 1.018466 | 0.98741  | 1.050499 | 0.246832 |
| KCNJ2    | 1.351074 | 1.241772 | 1.469997 | 2.73E-12 |
| RAP2C    | 0.956742 | 0.87649  | 1.044342 | 0.322509 |
| EXOSC9   | 1.12889  | 1.018912 | 1.250738 | 0.020437 |
| PLA2G12A | 1.112319 | 1.020766 | 1.212084 | 0.015142 |
| B9D2     | 1.149872 | 1.05072  | 1.25838  | 0.002403 |
| PFKFB2   | 1.03029  | 0.974585 | 1.089178 | 0.2927   |
| RAB38    | 1.109462 | 1.048217 | 1.174286 | 0.000337 |
| MXD4     | 0.927036 | 0.862619 | 0.996264 | 0.039223 |
| CKS2     | 0.982188 | 0.913268 | 1.056309 | 0.628265 |
| ACSL3    | 0.972453 | 0.898424 | 1.052582 | 0.489285 |
| CHPF     | 1.05498  | 0.985657 | 1.129179 | 0.122738 |
| DNPEP    | 1.117551 | 1.004882 | 1.242852 | 0.040385 |
| OBSL1    | 0.999435 | 0.951937 | 1.049303 | 0.981848 |
| FAM124B  | 1.055581 | 1.000865 | 1.113289 | 0.046392 |
| SLC12A4  | 1.075517 | 1.006384 | 1.1494   | 0.031739 |
| GCNT7    | 0.98809  | 0.939112 | 1.039624 | 0.644157 |
| PI3      | 1.114405 | 1.051815 | 1.180719 | 0.00024  |
| SNX21    | 1.093494 | 0.9977   | 1.198485 | 0.056037 |
| SLPI     | 0.987678 | 0.954621 | 1.02188  | 0.475346 |
| TTPAL    | 1.069015 | 0.997203 | 1.145999 | 0.059969 |
| PREX1    | 1.020574 | 0.950422 | 1.095904 | 0.57514  |

|         |          |          |          |          |
|---------|----------|----------|----------|----------|
| KCNS1   | 1.03022  | 0.967573 | 1.096924 | 0.352311 |
| SDC4    | 0.9856   | 0.945977 | 1.026883 | 0.488414 |
| NCOA3   | 0.948778 | 0.881212 | 1.021525 | 0.163028 |
| PIGT    | 1.089906 | 0.973747 | 1.219921 | 0.134323 |
| MATN4   | 1.081592 | 1.012684 | 1.155188 | 0.019531 |
| NCOA5   | 1.124607 | 1.034949 | 1.222031 | 0.005599 |
| VAPB    | 0.999713 | 0.911236 | 1.096782 | 0.995164 |
| PARD6B  | 1.286071 | 1.182495 | 1.398719 | 4.28E-09 |
| CHD6    | 0.960874 | 0.896121 | 1.030305 | 0.262182 |
| PLCG1   | 0.962877 | 0.91563  | 1.012562 | 0.14057  |
| TOX2    | 1.119054 | 1.052558 | 1.18975  | 0.00032  |
| ARFGEF2 | 0.932194 | 0.879041 | 0.988561 | 0.019077 |
| ZNFX1   | 0.988878 | 0.923926 | 1.058396 | 0.746949 |
| ZNF831  | 1.040324 | 0.959339 | 1.128145 | 0.33904  |
| CSE1L   | 1.030675 | 0.955479 | 1.11179  | 0.434394 |
| RAB22A  | 0.947273 | 0.864702 | 1.037728 | 0.244385 |
| STAU1   | 1.038075 | 0.944541 | 1.140872 | 0.437951 |
| CDH26   | 0.918579 | 0.848187 | 0.994813 | 0.036816 |
| SNAI1   | 0.974625 | 0.930262 | 1.021104 | 0.279556 |
| MOCS3   | 1.216451 | 1.09838  | 1.347215 | 0.000169 |
| STX16   | 1.060542 | 0.975968 | 1.152446 | 0.165664 |
| PPP4R1L | 0.932888 | 0.874415 | 0.995273 | 0.035427 |
| PMEPA1  | 0.995219 | 0.934961 | 1.059361 | 0.880456 |
| RNF114  | 0.945308 | 0.860943 | 1.037941 | 0.238313 |
| DDX27   | 0.938672 | 0.852003 | 1.034157 | 0.200388 |
| BCAS4   | 1.075681 | 1.001728 | 1.155094 | 0.044701 |
| TP53TG5 | 1.023481 | 0.961312 | 1.089671 | 0.467895 |
| ZBP1    | 1.114466 | 1.037612 | 1.197013 | 0.002952 |
| NEURL2  | 1.119415 | 0.986862 | 1.269773 | 0.079379 |
| MTRR    | 0.977116 | 0.894661 | 1.06717  | 0.606783 |
| FASTKD3 | 1.201363 | 1.083741 | 1.331751 | 0.000484 |
| PEPD    | 1.192548 | 1.100816 | 1.291924 | 1.62E-05 |
| IQSEC2  | 1.045083 | 0.97291  | 1.122609 | 0.22714  |
| VAMP7   | 0.945154 | 0.861257 | 1.037223 | 0.234299 |
| IL9R    | 0.973469 | 0.8898   | 1.065005 | 0.557585 |
| XG      | 0.890821 | 0.784126 | 1.012034 | 0.075703 |
| STAMBP  | 1.074503 | 0.97389  | 1.18551  | 0.151991 |
| NAGK    | 1.038378 | 0.963149 | 1.119484 | 0.326372 |
| MCEE    | 1.001492 | 0.917097 | 1.093653 | 0.973517 |
| PAIP2B  | 1.24553  | 1.145547 | 1.354241 | 2.71E-07 |
| SNRNP27 | 1.210693 | 1.091682 | 1.342678 | 0.000293 |
| MPHOSP- | 1.13059  | 1.022369 | 1.250267 | 0.016807 |
| IL17C   | 1.011676 | 0.937963 | 1.091181 | 0.763619 |
| ATP8A1  | 1.016188 | 0.960796 | 1.074772 | 0.574449 |
| USP22   | 0.931398 | 0.870572 | 0.996474 | 0.039163 |
| POF1B   | 1.091018 | 0.989336 | 1.203151 | 0.080955 |
| HIF3A   | 0.858112 | 0.765969 | 0.961339 | 0.008284 |
| ZNF576  | 1.026849 | 0.944647 | 1.116204 | 0.533699 |
| IRGC    | 1.027827 | 0.941757 | 1.121762 | 0.538481 |
| ZNF45   | 1.072874 | 0.988178 | 1.16483  | 0.093639 |
| LYPD3   | 1.092126 | 1.005284 | 1.186469 | 0.037103 |
| CEACAM8 | 1.001707 | 0.973959 | 1.030245 | 0.905303 |
| USP9X   | 0.972204 | 0.916352 | 1.03146  | 0.350383 |
| CRISP2  | 1.165138 | 1.088267 | 1.24744  | 1.14E-05 |
| F13A1   | 0.958527 | 0.926945 | 0.991185 | 0.013213 |
| TRERF1  | 0.935414 | 0.880328 | 0.993948 | 0.031084 |
| PACSIN1 | 0.968853 | 0.898565 | 1.044638 | 0.410238 |
| BTN2A2  | 1.086794 | 1.013581 | 1.165295 | 0.019333 |

|          |          |          |          |          |
|----------|----------|----------|----------|----------|
| SIRT5    | 0.9915   | 0.913798 | 1.07581  | 0.837572 |
| MRS2     | 1.039659 | 0.950401 | 1.137299 | 0.395767 |
| WRNIP1   | 1.012285 | 0.935986 | 1.094805 | 0.76007  |
| SNRPC    | 1.020351 | 0.932282 | 1.116739 | 0.661787 |
| SERPINB6 | 1.066637 | 0.999872 | 1.13786  | 0.050456 |
| XPO5     | 1.092524 | 1.010697 | 1.180976 | 0.025892 |
| ABCC10   | 1.104575 | 1.028567 | 1.1862   | 0.006251 |
| PEX6     | 1.04788  | 0.975181 | 1.125999 | 0.202348 |
| NQO2     | 1.091646 | 1.00172  | 1.189645 | 0.045593 |
| UNC5CL   | 1.023258 | 0.93877  | 1.115349 | 0.60104  |
| AARS2    | 1.145291 | 1.063882 | 1.232929 | 0.000311 |
| ZNF391   | 1.049691 | 0.960571 | 1.14708  | 0.28403  |
| RPS10    | 1.090065 | 1.001183 | 1.186838 | 0.046899 |
| MOCS1    | 1.297779 | 1.17289  | 1.435966 | 4.44E-07 |
| MED20    | 1.205724 | 1.112143 | 1.307178 | 5.67E-06 |
| OR2B6    | 1.015262 | 0.898984 | 1.146579 | 0.807183 |
| TBCC     | 1.116794 | 1.012535 | 1.231788 | 0.027168 |
| SPDEF    | 0.962704 | 0.851902 | 1.087918 | 0.542356 |
| TCP11    | 1.000228 | 0.844436 | 1.184762 | 0.997895 |
| MAD2L1Bf | 1.108468 | 1.001054 | 1.227408 | 0.047678 |
| APOBEC2  | 1.017411 | 0.953188 | 1.085961 | 0.603864 |
| KLHDC3   | 1.023279 | 0.940607 | 1.113218 | 0.592372 |
| GNMT     | 1.043082 | 0.972667 | 1.118594 | 0.236883 |
| DNAH8    | 0.833725 | 0.74535  | 0.932578 | 0.001468 |
| TREM1    | 0.986612 | 0.947934 | 1.026867 | 0.50888  |
| MEA1     | 1.195497 | 1.064042 | 1.343193 | 0.002661 |
| CDKN1A   | 0.940996 | 0.896552 | 0.987644 | 0.013754 |
| SOX4     | 0.975657 | 0.925848 | 1.028146 | 0.356649 |
| GLO1     | 1.103931 | 1.006229 | 1.211121 | 0.036502 |
| CPNE5    | 1.064002 | 0.981488 | 1.153453 | 0.131993 |
| KCNK17   | 0.965936 | 0.930965 | 1.002221 | 0.06547  |
| RREB1    | 0.879849 | 0.818111 | 0.946246 | 0.000564 |
| SSR1     | 1.103626 | 1.007174 | 1.209315 | 0.034587 |
| RIOK1    | 1.133551 | 1.029812 | 1.247741 | 0.010472 |
| NRN1     | 1.204209 | 1.077154 | 1.346251 | 0.001089 |
| SLC35B3  | 1.14908  | 1.051835 | 1.255316 | 0.002069 |
| RPP40    | 1.075224 | 0.998389 | 1.157972 | 0.055195 |
| ATXN1    | 0.983079 | 0.931596 | 1.037407 | 0.534053 |
| NUP153   | 0.968138 | 0.907419 | 1.03292  | 0.327167 |
| DEK      | 1.049641 | 0.95191  | 1.157407 | 0.331252 |
| EEF1E1   | 1.223555 | 1.117491 | 1.339685 | 1.29E-05 |
| RUNX2    | 0.971799 | 0.918606 | 1.028071 | 0.319233 |
| LRRFIP1  | 0.957492 | 0.883699 | 1.037446 | 0.288437 |
| RAB17    | 0.998432 | 0.898087 | 1.109988 | 0.976835 |
| CXCL6    | 1.379511 | 1.209173 | 1.573845 | 1.71E-06 |
| EREG     | 1.077327 | 1.048128 | 1.107339 | 1.08E-07 |
| AHNAK    | 0.985432 | 0.943991 | 1.028692 | 0.503195 |
| WNT1     | 1.035342 | 0.927631 | 1.155561 | 0.535473 |
| SH3TC1   | 1.069242 | 1.009314 | 1.132729 | 0.022906 |
| CNOT1    | 1.005911 | 0.931928 | 1.085769 | 0.879805 |
| LRRRC29  | 1.075519 | 0.964397 | 1.199444 | 0.190727 |
| BBS2     | 1.15409  | 1.063105 | 1.252861 | 0.000625 |
| MT1G     | 1.092556 | 1.044776 | 1.142522 | 0.000105 |
| MT2A     | 1.013702 | 0.974125 | 1.054887 | 0.503    |
| GOT2     | 1.093576 | 0.999637 | 1.196343 | 0.050932 |
| DOK4     | 1.09881  | 1.027253 | 1.175352 | 0.006096 |
| GPR18    | 1.005139 | 0.949609 | 1.063917 | 0.85968  |
| CLYBL    | 1.21144  | 1.050966 | 1.396417 | 0.008155 |

|          |          |          |          |          |
|----------|----------|----------|----------|----------|
| TMTC4    | 1.011027 | 0.943086 | 1.083864 | 0.757327 |
| RAP2A    | 0.99966  | 0.927941 | 1.076923 | 0.992862 |
| SLC10A2  | 1.08639  | 0.975122 | 1.210355 | 0.132838 |
| ABCC4    | 1.000403 | 0.948904 | 1.054698 | 0.98807  |
| EFNB2    | 1.119635 | 0.980767 | 1.278167 | 0.094421 |
| TM9SF2   | 1.017379 | 0.934053 | 1.108138 | 0.692702 |
| IRF1     | 0.987574 | 0.932014 | 1.046445 | 0.672108 |
| UPF3B    | 0.948444 | 0.859642 | 1.046419 | 0.291272 |
| RNF113A  | 0.962275 | 0.852835 | 1.085759 | 0.532449 |
| NDUFA1   | 1.024166 | 0.95607  | 1.097111 | 0.496362 |
| BMP4     | 1.029653 | 0.87325  | 1.214068 | 0.72812  |
| PTGER2   | 0.965164 | 0.917842 | 1.014925 | 0.166852 |
| FAM193A  | 0.952739 | 0.878249 | 1.033547 | 0.243785 |
| GRK4     | 1.159951 | 1.065747 | 1.262483 | 0.000596 |
| HS3ST3B1 | 1.021878 | 0.956817 | 1.091363 | 0.519068 |
| SLC25A35 | 1.299971 | 1.1849   | 1.426218 | 2.89E-08 |
| MRPS7    | 1.188927 | 1.047491 | 1.34946  | 0.007407 |
| GGA3     | 1.032701 | 0.93658  | 1.138686 | 0.518583 |
| ARMC7    | 1.10428  | 1.003201 | 1.215543 | 0.042845 |
| NUP85    | 1.129696 | 1.038985 | 1.228326 | 0.004297 |
| SLC25A19 | 1.092998 | 1.013393 | 1.178856 | 0.021179 |
| MIF4GD   | 1.039408 | 0.930952 | 1.160499 | 0.491806 |
| NT5C     | 0.952786 | 0.86538  | 1.049021 | 0.32455  |
| MSTO1    | 1.204176 | 1.089619 | 1.330778 | 0.00027  |
| TTF1     | 1.10391  | 1.007778 | 1.209211 | 0.033449 |
| GTF3C4   | 0.987218 | 0.912511 | 1.068042 | 0.74866  |
| DDX31    | 1.041597 | 0.966836 | 1.122139 | 0.283508 |
| PPP1R12C | 1.086373 | 0.997083 | 1.183658 | 0.058329 |
| MBOAT7   | 0.880214 | 0.818984 | 0.946021 | 0.000524 |
| SRMS     | 1.024697 | 0.940626 | 1.116283 | 0.576456 |
| OPRL1    | 1.099055 | 0.962125 | 1.255474 | 0.164154 |
| SLC2A4RG | 0.930222 | 0.85709  | 1.009593 | 0.083375 |
| PPDPF    | 0.986992 | 0.940225 | 1.036085 | 0.597047 |
| IL1B     | 1.035924 | 0.992882 | 1.080832 | 0.103092 |
| CHCHD5   | 1.024968 | 0.929318 | 1.130463 | 0.621738 |
| PAX8     | 1.085147 | 0.992384 | 1.186581 | 0.073087 |
| INSIG2   | 1.094151 | 1.014153 | 1.180459 | 0.020193 |
| POLR1B   | 1.115951 | 1.033968 | 1.204433 | 0.004832 |
| CCDC93   | 1.008782 | 0.939237 | 1.083477 | 0.81039  |
| PSD4     | 1.105385 | 1.033444 | 1.182334 | 0.003522 |
| SLC25A23 | 1.263938 | 1.183045 | 1.350361 | 3.89E-12 |
| PSPN     | 1.035927 | 0.940565 | 1.140957 | 0.473771 |
| GTF2F1   | 0.903119 | 0.818042 | 0.997043 | 0.043526 |
| ALKBH7   | 0.868152 | 0.79712  | 0.945515 | 0.001169 |
| CLPP     | 1.046653 | 0.93494  | 1.171714 | 0.428487 |
| TNFSF9   | 1.019415 | 0.973785 | 1.067183 | 0.410505 |
| THOC2    | 0.978953 | 0.906974 | 1.056643 | 0.585114 |
| MED1     | 0.980749 | 0.906874 | 1.060641 | 0.626603 |
| RPL23    | 0.951306 | 0.874744 | 1.034569 | 0.243576 |
| ATG4C    | 1.048406 | 0.975471 | 1.126794 | 0.198828 |
| CD70     | 1.05347  | 1.009923 | 1.098896 | 0.01559  |
| C3       | 1.125173 | 1.037389 | 1.220386 | 0.004432 |
| SH2D3A   | 1.293042 | 1.189859 | 1.405172 | 1.39E-09 |
| TRIP10   | 1.186547 | 1.111305 | 1.266884 | 3.10E-07 |
| GPR108   | 1.30948  | 1.172976 | 1.461869 | 1.58E-06 |
| TNFSF14  | 1.162392 | 1.081627 | 1.249186 | 4.21E-05 |
| FOSB     | 0.980509 | 0.934877 | 1.028369 | 0.418227 |
| OPA3     | 1.101869 | 1.011722 | 1.200047 | 0.025909 |

|         |          |          |          |          |
|---------|----------|----------|----------|----------|
| SNRPD2  | 1.030789 | 0.939222 | 1.131283 | 0.522887 |
| RTN2    | 1.103784 | 1.014645 | 1.200755 | 0.021541 |
| EML2    | 1.129243 | 1.036243 | 1.230589 | 0.005574 |
| VASP    | 1.030228 | 0.948378 | 1.119142 | 0.480763 |
| SYMPK   | 1.039593 | 0.954995 | 1.131685 | 0.369918 |
| SDCBP2  | 1.012169 | 0.938385 | 1.091753 | 0.754131 |
| PANK2   | 0.984798 | 0.911433 | 1.064069 | 0.698154 |
| GNRH2   | 1.020476 | 0.949552 | 1.096697 | 0.581295 |
| CD93    | 1.06579  | 1.024851 | 1.108366 | 0.001431 |
| GZF1    | 1.001533 | 0.925479 | 1.083837 | 0.969676 |
| NAPB    | 1.018475 | 0.947804 | 1.094414 | 0.617834 |
| CENPB   | 1.001408 | 0.937403 | 1.069783 | 0.966702 |
| PSMF1   | 1.142925 | 1.000474 | 1.305659 | 0.049189 |
| DTD1    | 1.431838 | 1.320878 | 1.552119 | 2.73E-18 |
| RBCK1   | 1.090452 | 0.976728 | 1.217418 | 0.123331 |
| TMX4    | 0.957906 | 0.889506 | 1.031566 | 0.255222 |
| STK35   | 0.971399 | 0.897336 | 1.051574 | 0.473283 |
| SNRPB   | 0.992529 | 0.89811  | 1.096874 | 0.883103 |
| NRSN2   | 0.949419 | 0.882736 | 1.021139 | 0.162426 |
| RRBP1   | 0.991614 | 0.916173 | 1.073267 | 0.83477  |
| BMP2    | 1.221957 | 1.163416 | 1.283442 | 1.22E-15 |
| ZNF133  | 1.306975 | 1.208244 | 1.413773 | 2.39E-11 |
| MKKS    | 1.10739  | 1.01557  | 1.207512 | 0.020899 |
| BFSP1   | 1.309865 | 1.159767 | 1.47939  | 1.38E-05 |
| DSTN    | 0.99921  | 0.923    | 1.081714 | 0.984432 |
| SNRPB2  | 1.056378 | 0.952719 | 1.171316 | 0.29796  |
| TBC1D20 | 0.997861 | 0.914805 | 1.088458 | 0.961484 |
| ITPA    | 1.12535  | 1.033979 | 1.224795 | 0.006269 |
| MCM8    | 1.23353  | 1.118864 | 1.359948 | 2.48E-05 |
| FAM110A | 1.031242 | 0.952642 | 1.116327 | 0.44693  |
| SIRPD   | 1.118055 | 1.032406 | 1.21081  | 0.006065 |
| MRPS26  | 1.177409 | 1.081762 | 1.281512 | 0.000158 |
| S1PR4   | 0.832145 | 0.78192  | 0.885597 | 7.25E-09 |
| NCLN    | 0.903562 | 0.833394 | 0.979639 | 0.013943 |
| HNRNPR  | 1.008069 | 0.91586  | 1.109562 | 0.869568 |
| ZNF436  | 0.971481 | 0.896077 | 1.053231 | 0.482764 |
| MAX     | 0.970942 | 0.897827 | 1.050011 | 0.460367 |
| ARMCX5  | 1.069744 | 0.971714 | 1.177665 | 0.169184 |
| MMP24   | 1.033332 | 0.967723 | 1.103389 | 0.327244 |
| NECAB3  | 0.90235  | 0.825436 | 0.986431 | 0.023789 |
| ID1     | 1.039935 | 0.988479 | 1.09407  | 0.130433 |
| RALY    | 0.906071 | 0.819155 | 1.00221  | 0.055231 |
| DYNLRB1 | 1.031279 | 0.912211 | 1.165888 | 0.622685 |
| EIF2S2  | 0.975556 | 0.876564 | 1.085727 | 0.650311 |
| ERGIC3  | 0.962807 | 0.859685 | 1.078299 | 0.51199  |
| ROMO1   | 1.063776 | 0.977322 | 1.157877 | 0.152844 |
| CEP250  | 1.069268 | 0.969281 | 1.179568 | 0.181197 |
| PLAGL2  | 0.948173 | 0.876085 | 1.026192 | 0.187136 |
| AMOT    | 1.106232 | 1.015687 | 1.204849 | 0.020492 |
| TMEM115 | 1.01124  | 0.933415 | 1.095554 | 0.784422 |
| PSMB2   | 0.990665 | 0.880705 | 1.114354 | 0.875845 |
| UROD    | 1.15153  | 1.074585 | 1.233985 | 6.37E-05 |
| ST3GAL3 | 1.035646 | 0.969167 | 1.106685 | 0.300792 |
| TMEM53  | 1.201372 | 1.095598 | 1.317358 | 9.56E-05 |
| HECTD3  | 1.168752 | 1.06528  | 1.282274 | 0.000977 |
| KLC1    | 0.970623 | 0.90129  | 1.045289 | 0.430368 |
| XRCC3   | 0.95919  | 0.888394 | 1.035627 | 0.286831 |
| TUBGCP3 | 0.976023 | 0.908044 | 1.049091 | 0.509974 |

|         |          |          |          |          |
|---------|----------|----------|----------|----------|
| MCF2L   | 1.055348 | 0.932877 | 1.193898 | 0.392023 |
| PCID2   | 1.078364 | 0.987391 | 1.177719 | 0.09339  |
| PROZ    | 1.411592 | 1.216906 | 1.637425 | 5.30E-06 |
| LRFN3   | 1.188194 | 1.064715 | 1.325993 | 0.00207  |
| CAPNS1  | 0.958004 | 0.882772 | 1.039647 | 0.303866 |
| PDCD2L  | 1.323678 | 1.19418  | 1.467219 | 9.38E-08 |
| RBM42   | 0.941419 | 0.845842 | 1.047797 | 0.269081 |
| KIRREL2 | 0.961863 | 0.907915 | 1.019016 | 0.186724 |
| UBA2    | 0.962606 | 0.879896 | 1.053091 | 0.405733 |
| FFAR2   | 1.099176 | 1.052862 | 1.147528 | 1.67E-05 |
| HCST    | 0.955664 | 0.900733 | 1.013945 | 0.133238 |
| FFAR1   | 1.027675 | 0.965824 | 1.093486 | 0.388706 |
| COX6B1  | 1.028798 | 0.945816 | 1.119061 | 0.508176 |
| THRA    | 0.901238 | 0.831092 | 0.977305 | 0.011895 |
| CCR7    | 1.00021  | 0.957484 | 1.044843 | 0.992473 |
| NR1D1   | 1.103654 | 1.01039  | 1.205526 | 0.028566 |
| FRMD8   | 1.033746 | 0.956589 | 1.117126 | 0.401702 |
| PRDX5   | 1.109816 | 1.019817 | 1.207759 | 0.015747 |
| BCL2L12 | 0.986405 | 0.890134 | 1.093088 | 0.793903 |
| IRF3    | 1.187332 | 1.091352 | 1.291754 | 6.54E-05 |
| PRMT1   | 0.972788 | 0.892268 | 1.060573 | 0.531404 |
| RRAS    | 0.95797  | 0.892058 | 1.028752 | 0.237768 |
| PRRG2   | 1.127448 | 1.012678 | 1.255224 | 0.028527 |
| SCAF1   | 0.912941 | 0.840839 | 0.991226 | 0.030014 |
| PRR12   | 0.924372 | 0.857722 | 0.996202 | 0.039435 |
| TSKS    | 1.002785 | 0.93298  | 1.077814 | 0.939772 |
| FLRT1   | 1.075487 | 0.965558 | 1.197931 | 0.185886 |
| ASL     | 1.053558 | 0.954706 | 1.162646 | 0.299326 |
| SBDS    | 0.899861 | 0.837658 | 0.966682 | 0.003887 |
| CSN1S1  | 1.013289 | 0.923417 | 1.111907 | 0.78056  |
| STAT5A  | 0.878443 | 0.820041 | 0.941004 | 0.000222 |
| WNK4    | 1.227997 | 1.079405 | 1.397045 | 0.001802 |
| BECN1   | 1.079666 | 0.965162 | 1.207755 | 0.180229 |
| PRKCG   | 1.031676 | 0.959394 | 1.109404 | 0.400096 |
| TRAP1   | 1.064338 | 0.985357 | 1.14965  | 0.112968 |
| GLIS2   | 1.06298  | 0.977974 | 1.155376 | 0.15094  |
| DNAJC8  | 1.087013 | 0.967393 | 1.221425 | 0.160721 |
| AHDC1   | 0.975909 | 0.916243 | 1.039461 | 0.448695 |
| IFI6    | 1.117947 | 1.069969 | 1.168076 | 6.30E-07 |
| ZNF384  | 0.971365 | 0.86901  | 1.085776 | 0.609075 |
| EMG1    | 1.217391 | 1.070246 | 1.384766 | 0.002764 |
| UXT     | 0.92411  | 0.84159  | 1.01472  | 0.098176 |
| CFP     | 1.021617 | 0.945538 | 1.103816 | 0.588065 |
| ELK1    | 0.968125 | 0.878843 | 1.066477 | 0.511688 |
| TIMM17B | 1.212314 | 1.064521 | 1.380625 | 0.003701 |
| KTN1    | 0.910974 | 0.839413 | 0.988635 | 0.025496 |
| RHOJ    | 1.305394 | 1.048018 | 1.625978 | 0.017381 |
| DLGAP5  | 1.085683 | 1.030347 | 1.143991 | 0.00207  |
| HSPA2   | 0.994126 | 0.941584 | 1.049601 | 0.831618 |
| ZBTB1   | 1.004477 | 0.931163 | 1.083563 | 0.908031 |
| TRMT5   | 1.176102 | 1.062297 | 1.302099 | 0.001785 |
| SGPP1   | 0.942886 | 0.898941 | 0.98898  | 0.015735 |
| PLEKHG3 | 1.08636  | 1.031282 | 1.144379 | 0.001807 |
| PZP     | 1.128945 | 1.054725 | 1.208388 | 0.000473 |
| RHOT1   | 0.991829 | 0.908906 | 1.082317 | 0.853871 |
| EVI2A   | 0.906524 | 0.840863 | 0.977314 | 0.010523 |
| OMG     | 0.971782 | 0.916252 | 1.030678 | 0.34036  |
| AIF1L   | 0.942172 | 0.901959 | 0.984177 | 0.007436 |



|         |          |          |          |          |
|---------|----------|----------|----------|----------|
| FAM78A  | 1.07982  | 1.010185 | 1.154255 | 0.023952 |
| NUP214  | 0.952018 | 0.862061 | 1.051363 | 0.33158  |
| CTAG2   | 0.990529 | 0.8261   | 1.187686 | 0.918163 |
| AVPR2   | 1.108752 | 1.034999 | 1.187761 | 0.003288 |
| SLC10A3 | 0.967014 | 0.878346 | 1.064634 | 0.494246 |
| MAP2K2  | 1.043675 | 0.920904 | 1.182814 | 0.50318  |
| HNRNPH2 | 1.034124 | 0.939747 | 1.13798  | 0.491947 |
| ARMCX1  | 1.03839  | 0.975906 | 1.104874 | 0.234156 |
| TIMM8A  | 1.116466 | 1.01257  | 1.231022 | 0.027062 |
| ZC4H2   | 1.152481 | 1.051829 | 1.262765 | 0.002337 |
| CANX    | 0.91457  | 0.847295 | 0.987188 | 0.021978 |
| IPPK    | 1.077966 | 0.989236 | 1.174656 | 0.086709 |
| ZNF484  | 1.104032 | 1.021995 | 1.192655 | 0.011997 |
| OMD     | 1.081967 | 1.011176 | 1.157714 | 0.022496 |
| FGD3    | 1.013223 | 0.941656 | 1.09023  | 0.725221 |
| HIVEP3  | 1.286001 | 1.200614 | 1.377461 | 7.19E-13 |
| PPCS    | 1.288479 | 1.15518  | 1.43716  | 5.39E-06 |
| BCL11B  | 0.999103 | 0.952053 | 1.048478 | 0.970909 |
| COX7C   | 1.024941 | 0.950276 | 1.105472 | 0.523248 |
| TRAF2   | 1.054271 | 0.964856 | 1.151973 | 0.242494 |
| ABHD8   | 1.076363 | 0.977803 | 1.184859 | 0.133138 |
| ATP13A4 | 1.099231 | 0.975359 | 1.238834 | 0.120911 |
| HELB    | 1.050875 | 0.989074 | 1.116538 | 0.108561 |
| RAP1B   | 0.963263 | 0.896654 | 1.03482  | 0.305949 |
| BEST3   | 1.063156 | 0.986281 | 1.146024 | 0.109768 |
| RAB3IP  | 1.144108 | 1.051156 | 1.245281 | 0.001846 |
| PTPRB   | 1.131873 | 1.053053 | 1.216591 | 0.000769 |
| DYRK2   | 1.005846 | 0.937565 | 1.079099 | 0.870907 |
| YEATS4  | 1.088334 | 0.978284 | 1.210764 | 0.119634 |
| TAS2R3  | 1.020908 | 0.944888 | 1.103045 | 0.600198 |
| TAS2R4  | 1.009554 | 0.920069 | 1.107743 | 0.840857 |
| TAS2R5  | 0.995111 | 0.917759 | 1.078982 | 0.905507 |
| LRR61   | 1.01443  | 0.949834 | 1.083419 | 0.669538 |
| IDUA    | 1.049492 | 0.97044  | 1.134983 | 0.226666 |
| FGFRL1  | 1.037738 | 0.985439 | 1.092812 | 0.160314 |
| TMEM175 | 1.130919 | 1.027467 | 1.244787 | 0.011952 |
| PIN1    | 1.093246 | 0.964858 | 1.238718 | 0.161903 |
| FBXL12  | 0.996487 | 0.897405 | 1.106509 | 0.947494 |
| UBR4    | 0.972738 | 0.918848 | 1.029789 | 0.341846 |
| HP1BP3  | 1.10265  | 0.994915 | 1.222051 | 0.062494 |
| SIN3B   | 1.034162 | 0.952879 | 1.12238  | 0.42123  |
| SLC35E1 | 0.929416 | 0.85952  | 1.004996 | 0.066501 |
| EPS15L1 | 0.904155 | 0.827679 | 0.987696 | 0.025449 |
| KLF2    | 0.9299   | 0.886416 | 0.975516 | 0.002935 |
| F2RL3   | 1.084843 | 1.009063 | 1.166313 | 0.027513 |
| GFER    | 1.12317  | 0.991106 | 1.272832 | 0.068761 |
| SYNGR3  | 1.116374 | 1.001158 | 1.244851 | 0.047616 |
| PKMYT1  | 1.070059 | 0.995694 | 1.149979 | 0.065395 |
| WFIKN1  | 0.995301 | 0.873853 | 1.133627 | 0.943441 |
| WDR24   | 1.090716 | 0.999562 | 1.190183 | 0.051161 |
| FBXL16  | 1.114157 | 0.991935 | 1.251438 | 0.068247 |
| CHTF18  | 1.063729 | 0.990087 | 1.142848 | 0.09145  |
| GNG13   | 1.442453 | 1.223255 | 1.700929 | 1.32E-05 |
| MACF1   | 0.96399  | 0.91513  | 1.015458 | 0.166987 |
| SMARCA4 | 1.038983 | 0.950892 | 1.135236 | 0.397547 |
| TICAM1  | 0.910552 | 0.848993 | 0.976574 | 0.008699 |
| IL17B   | 1.194177 | 1.049594 | 1.358677 | 0.007037 |
| TUBA4A  | 1.017187 | 0.961308 | 1.076315 | 0.554433 |

|          |          |          |          |          |
|----------|----------|----------|----------|----------|
| VIL1     | 1.092914 | 0.948811 | 1.258903 | 0.218103 |
| AAMP     | 1.041015 | 0.94304  | 1.149169 | 0.425422 |
| PNKD     | 0.909669 | 0.840128 | 0.984965 | 0.01963  |
| TNFRSF19 | 0.951401 | 0.879364 | 1.029338 | 0.214915 |
| RNF6     | 0.968716 | 0.89065  | 1.053624 | 0.458426 |
| ECHS1    | 1.136483 | 1.048783 | 1.231516 | 0.001794 |
| AKAP9    | 0.918333 | 0.855963 | 0.985248 | 0.01759  |
| GNG11    | 1.059382 | 0.996783 | 1.125912 | 0.063416 |
| HIP1     | 1.123267 | 1.062599 | 1.1874   | 4.07E-05 |
| PTPN12   | 1.087413 | 1.005213 | 1.176334 | 0.036653 |
| POR      | 1.062464 | 0.971456 | 1.161998 | 0.184797 |
| FGL2     | 1.039914 | 0.998393 | 1.083161 | 0.059753 |
| STYXL1   | 1.000062 | 0.921819 | 1.084945 | 0.998818 |
| STEAP4   | 1.200275 | 1.102542 | 1.306671 | 2.52E-05 |
| GNAI1    | 0.902749 | 0.840868 | 0.969183 | 0.004744 |
| PEX1     | 1.081658 | 0.989127 | 1.182846 | 0.085369 |
| CASD1    | 0.996033 | 0.929334 | 1.067519 | 0.910496 |
| ZNF780B  | 1.040888 | 0.972979 | 1.113537 | 0.244353 |
| LRFN1    | 0.948689 | 0.88158  | 1.020908 | 0.159375 |
| ZFP36    | 0.955088 | 0.902362 | 1.010895 | 0.112745 |
| SRD5A3   | 1.130249 | 1.01995  | 1.252476 | 0.019439 |
| SPINK2   | 1.091404 | 1.06422  | 1.119283 | 1.07E-11 |
| PAICS    | 1.039857 | 0.964655 | 1.120922 | 0.307519 |
| KDR      | 1.137076 | 1.021674 | 1.265512 | 0.018639 |
| PPAT     | 1.100906 | 1.012297 | 1.197271 | 0.02474  |
| TUBGCP6  | 1.009325 | 0.941937 | 1.081534 | 0.792343 |
| ADM2     | 0.935458 | 0.873147 | 1.002215 | 0.057822 |
| DGCR6L   | 1.125884 | 1.027953 | 1.233144 | 0.010656 |
| DGCR8    | 1.069622 | 0.983375 | 1.163434 | 0.116621 |
| ASPHD2   | 1.068087 | 0.980633 | 1.16334  | 0.130722 |
| VPREB3   | 1.057483 | 1.002219 | 1.115794 | 0.04126  |
| SDF2L1   | 1.115537 | 1.04118  | 1.195204 | 0.001893 |
| YWHAH    | 0.929837 | 0.847    | 1.020775 | 0.126498 |
| RFPL2    | 1.17225  | 1.019536 | 1.347838 | 0.025639 |
| GNAZ     | 1.237923 | 1.151383 | 1.330968 | 7.82E-09 |
| MGAT3    | 0.968448 | 0.916249 | 1.023621 | 0.256747 |
| ADORA2A  | 1.044576 | 0.971609 | 1.123022 | 0.237842 |
| ATF4     | 0.877965 | 0.805702 | 0.956709 | 0.00298  |
| A4GALT   | 1.030542 | 0.973594 | 1.090821 | 0.299602 |
| CDC42EP1 | 1.089704 | 1.034294 | 1.148083 | 0.001254 |
| APOL3    | 1.017726 | 0.957132 | 1.082157 | 0.574786 |
| TPST2    | 1.213554 | 1.121861 | 1.312741 | 1.37E-06 |
| BAIAP2L2 | 1.246744 | 1.14297  | 1.359939 | 6.57E-07 |
| MPST     | 0.925988 | 0.84251  | 1.017738 | 0.110665 |
| GALR3    | 0.915603 | 0.807268 | 1.038477 | 0.16996  |
| TST      | 1.070181 | 0.997278 | 1.148413 | 0.059532 |
| IGLL1    | 1.001988 | 0.974533 | 1.030217 | 0.888566 |
| APOL2    | 1.010324 | 0.94586  | 1.079181 | 0.760123 |
| RAC2     | 1.11757  | 1.036303 | 1.205209 | 0.003905 |
| LIF      | 0.949942 | 0.884696 | 1.019999 | 0.157201 |
| APOBEC3/ | 1.032807 | 0.992316 | 1.07495  | 0.113667 |
| APOBEC3F | 1.054104 | 0.97477  | 1.139895 | 0.186879 |
| RIBC2    | 1.143915 | 1.052529 | 1.243235 | 0.00155  |
| KRT17    | 0.881586 | 0.845809 | 0.918877 | 2.49E-09 |
| DOCK4    | 0.873734 | 0.817641 | 0.933674 | 6.69E-05 |
| POT1     | 1.022607 | 0.934358 | 1.119191 | 0.627329 |
| ATP6V1F  | 0.991491 | 0.91263  | 1.077166 | 0.839846 |
| LSM8     | 1.116148 | 0.998413 | 1.247766 | 0.053356 |

|          |          |          |          |          |
|----------|----------|----------|----------|----------|
| PRKRIP1  | 0.920678 | 0.837481 | 1.012139 | 0.087216 |
| VGf      | 1.020412 | 0.919014 | 1.132997 | 0.705132 |
| PODXL    | 1.026898 | 0.956755 | 1.102183 | 0.462161 |
| MKLN1    | 0.980469 | 0.921411 | 1.043313 | 0.53377  |
| DNAJB9   | 0.959797 | 0.890547 | 1.034432 | 0.282842 |
| FLNC     | 0.821477 | 0.740578 | 0.911215 | 0.000201 |
| LRRc4    | 0.984086 | 0.930955 | 1.040249 | 0.571062 |
| CALU     | 1.020192 | 0.941284 | 1.105714 | 0.626463 |
| CCDC136  | 1.230456 | 1.159442 | 1.30582  | 8.06E-12 |
| SMO      | 1.043801 | 0.97371  | 1.118938 | 0.226753 |
| IRF5     | 1.110194 | 1.029553 | 1.197152 | 0.006589 |
| LRRc17   | 1.13414  | 1.014134 | 1.268347 | 0.02739  |
| KLHDC10  | 0.934688 | 0.862562 | 1.012846 | 0.099264 |
| NDUFA5   | 1.03571  | 0.932027 | 1.150927 | 0.514421 |
| OPN1SW   | 1.060117 | 0.954851 | 1.176988 | 0.273903 |
| MRPS12   | 1.154095 | 1.058688 | 1.258099 | 0.001132 |
| MYO1B    | 1.170826 | 1.087799 | 1.260189 | 2.64E-05 |
| MTX2     | 1.025347 | 0.936531 | 1.122585 | 0.588178 |
| GAD1     | 1.117565 | 1.06399  | 1.173839 | 9.23E-06 |
| OSGEPL1  | 1.117224 | 1.026271 | 1.216237 | 0.010512 |
| ORMDL1   | 1.121333 | 1.020787 | 1.231784 | 0.016885 |
| HAT1     | 0.979061 | 0.884091 | 1.084232 | 0.684381 |
| HERC2    | 1.021918 | 0.961207 | 1.086463 | 0.487801 |
| SNRPN    | 1.042172 | 0.982736 | 1.105203 | 0.167985 |
| PSMG2    | 1.015879 | 0.904153 | 1.141411 | 0.790999 |
| TWSG1    | 0.92625  | 0.866854 | 0.989716 | 0.023472 |
| ARHGAP27 | 1.177123 | 1.111094 | 1.247077 | 3.09E-08 |
| WDFY4    | 1.027481 | 0.974657 | 1.083168 | 0.314066 |
| EIF2AK4  | 1.03187  | 0.941016 | 1.131494 | 0.504682 |
| MYO5C    | 0.930662 | 0.879168 | 0.985173 | 0.013348 |
| CGNL1    | 1.24277  | 1.147723 | 1.345688 | 8.60E-08 |
| TMOD2    | 1.034253 | 0.968379 | 1.104607 | 0.315849 |
| TTBK2    | 0.943799 | 0.872252 | 1.021214 | 0.150417 |
| ELL3     | 0.862457 | 0.766771 | 0.970082 | 0.013655 |
| INO80    | 0.914635 | 0.853505 | 0.980143 | 0.011463 |
| DLL4     | 0.934815 | 0.836167 | 1.045102 | 0.236151 |
| ALDH1A2  | 1.371616 | 1.208763 | 1.556409 | 9.58E-07 |
| IVD      | 1.135425 | 1.053697 | 1.223492 | 0.000861 |
| DUT      | 1.150323 | 1.0563   | 1.252714 | 0.001287 |
| CHAC1    | 1.043906 | 0.987308 | 1.103748 | 0.13083  |
| CLN6     | 0.987439 | 0.906966 | 1.075052 | 0.770711 |
| ARPP19   | 0.952241 | 0.879324 | 1.031205 | 0.2286   |
| VPS13C   | 0.989228 | 0.939079 | 1.042056 | 0.683267 |
| LOXL1    | 1.067983 | 0.996798 | 1.144251 | 0.061647 |
| ANAPC13  | 1.117604 | 1.013973 | 1.231826 | 0.025127 |
| MBD4     | 1.05574  | 0.969497 | 1.149655 | 0.212212 |
| COPB1    | 0.927949 | 0.861795 | 0.999182 | 0.047518 |
| PSMA1    | 0.932722 | 0.843024 | 1.031965 | 0.176998 |
| SUMF2    | 0.9403   | 0.861189 | 1.026679 | 0.169819 |
| PALLD    | 1.122485 | 1.050098 | 1.199862 | 0.000681 |
| SPCS3    | 0.990135 | 0.91166  | 1.075365 | 0.813967 |
| MYOD1    | 0.954865 | 0.686453 | 1.328231 | 0.783871 |
| SERGEF   | 1.129705 | 1.030772 | 1.238133 | 0.009104 |
| TPH1     | 1.147268 | 0.974605 | 1.350519 | 0.098766 |
| E2F8     | 1.18969  | 1.117006 | 1.267103 | 6.66E-08 |
| DCTD     | 0.946708 | 0.863154 | 1.038349 | 0.245358 |
| SOX15    | 0.842289 | 0.778541 | 0.911257 | 1.92E-05 |
| RPAIN    | 0.968203 | 0.895339 | 1.046997 | 0.418239 |

|          |          |          |          |          |
|----------|----------|----------|----------|----------|
| USP6     | 1.064485 | 0.967186 | 1.171571 | 0.201334 |
| SHBG     | 0.894285 | 0.791201 | 1.010799 | 0.073766 |
| PLD2     | 1.061715 | 0.994522 | 1.133448 | 0.072606 |
| CD68     | 1.045562 | 0.896917 | 1.218842 | 0.569039 |
| TXNDC17  | 1.284414 | 1.144044 | 1.442006 | 2.25E-05 |
| ATP1B2   | 1.064611 | 1.003018 | 1.129986 | 0.039488 |
| FXR2     | 0.924421 | 0.850957 | 1.004227 | 0.062868 |
| KIF1C    | 1.115023 | 1.040172 | 1.195261 | 0.002134 |
| MPDU1    | 0.945472 | 0.857577 | 1.042376 | 0.260037 |
| PHF20L1  | 1.008814 | 0.930562 | 1.093647 | 0.831309 |
| LRRC6    | 0.972383 | 0.885646 | 1.067614 | 0.556873 |
| CCNT1    | 0.954028 | 0.895817 | 1.01602  | 0.142875 |
| PUS7L    | 1.110799 | 1.025877 | 1.202751 | 0.00961  |
| KRI1     | 1.269703 | 1.156124 | 1.39444  | 5.91E-07 |
| ILF3     | 0.952881 | 0.884314 | 1.026764 | 0.205241 |
| SLC44A2  | 0.94963  | 0.888385 | 1.015097 | 0.128649 |
| CDKN2D   | 1.069275 | 0.998864 | 1.144649 | 0.053946 |
| MTUS1    | 0.997821 | 0.864845 | 1.151244 | 0.976158 |
| SIGLEC9  | 0.996669 | 0.949049 | 1.046678 | 0.89374  |
| NGDN     | 0.984494 | 0.890987 | 1.087814 | 0.758903 |
| RIPK3    | 1.218025 | 1.14278  | 1.298226 | 1.34E-09 |
| ADCY4    | 1.227741 | 1.151463 | 1.309072 | 3.62E-10 |
| RAB2B    | 0.965942 | 0.888153 | 1.050543 | 0.418559 |
| BCL2L2   | 0.961535 | 0.893668 | 1.034556 | 0.293581 |
| PARP2    | 0.993833 | 0.899051 | 1.098609 | 0.903725 |
| HEATR5A  | 0.99547  | 0.916217 | 1.081578 | 0.914573 |
| SNX6     | 0.952437 | 0.863784 | 1.05019  | 0.328284 |
| EAPP     | 1.041331 | 0.932876 | 1.162396 | 0.470458 |
| NRL      | 1.138188 | 0.994818 | 1.30222  | 0.05952  |
| RNASE1   | 1.070325 | 1.024486 | 1.118214 | 0.002341 |
| NEDD8    | 1.250795 | 1.093022 | 1.431342 | 0.001142 |
| DAD1     | 1.047069 | 0.975112 | 1.124337 | 0.205452 |
| TEP1     | 1.0316   | 0.972376 | 1.094431 | 0.302381 |
| EPB41L4A | 1.1628   | 1.036218 | 1.304847 | 0.010318 |
| REEP5    | 0.89093  | 0.837437 | 0.94784  | 0.000257 |
| ITFG1    | 1.120122 | 1.009656 | 1.242675 | 0.032245 |
| QRICH2   | 1.002129 | 0.942079 | 1.066006 | 0.94623  |
| FOXJ1    | 1.238672 | 1.102776 | 1.391314 | 0.000306 |
| SEC14L1  | 0.994572 | 0.922858 | 1.07186  | 0.88666  |
| RHBDF2   | 1.092127 | 1.02075  | 1.168495 | 0.010603 |
| AANAT    | 1.09649  | 1.00014  | 1.202122 | 0.049653 |
| ARHGEF6  | 0.912845 | 0.8623   | 0.966354 | 0.001704 |
| MAP7D3   | 1.012368 | 0.926538 | 1.106149 | 0.785668 |
| ASH2L    | 1.111854 | 1.014821 | 1.218166 | 0.022862 |
| CHRNA10  | 1.015726 | 0.913792 | 1.129031 | 0.772443 |
| CDKN1C   | 0.951468 | 0.902913 | 1.002636 | 0.062677 |
| RPS4Y1   | 1.010277 | 0.989956 | 1.031015 | 0.324022 |
| KLF16    | 0.944637 | 0.875766 | 1.018923 | 0.14032  |
| DOHH     | 0.973824 | 0.893981 | 1.060799 | 0.543383 |
| SHC2     | 0.850866 | 0.702256 | 1.030925 | 0.09915  |
| LBP      | 0.991409 | 0.890494 | 1.10376  | 0.874827 |
| CBFA2T3  | 1.047631 | 0.985923 | 1.113201 | 0.133031 |
| GAMT     | 0.987559 | 0.919178 | 1.061028 | 0.7324   |
| PHF10    | 1.025385 | 0.941303 | 1.116978 | 0.56579  |
| PRRG3    | 1.224708 | 1.08492  | 1.382508 | 0.001045 |
| STARD8   | 1.069563 | 1.01604  | 1.125907 | 0.010245 |
| GDPD2    | 1.061125 | 0.938994 | 1.199142 | 0.341605 |
| SAT1     | 0.916868 | 0.861055 | 0.976298 | 0.006758 |

|         |          |          |          |          |
|---------|----------|----------|----------|----------|
| GNL3L   | 1.078342 | 0.996514 | 1.16689  | 0.061037 |
| SH3BP4  | 1.081847 | 1.035758 | 1.129987 | 0.000398 |
| MOSPD2  | 0.992154 | 0.923497 | 1.065915 | 0.829539 |
| DOCK6   | 1.004063 | 0.942775 | 1.069334 | 0.899596 |
| ECSIT   | 1.208814 | 1.071208 | 1.364096 | 0.002101 |
| LDLR    | 1.078022 | 1.024846 | 1.133958 | 0.003604 |
| ELOF1   | 1.23683  | 1.108144 | 1.38046  | 0.00015  |
| TSPAN16 | 0.996602 | 0.943906 | 1.052241 | 0.902272 |
| PRKCSH  | 0.859504 | 0.797553 | 0.926266 | 7.29E-05 |
| CDC16   | 1.105988 | 1.02162  | 1.197324 | 0.012836 |
| APOE    | 0.986093 | 0.927576 | 1.048301 | 0.653661 |
| TOMM40  | 1.046316 | 0.960353 | 1.139975 | 0.300625 |
| APOC1   | 1.062221 | 1.000332 | 1.127938 | 0.048746 |
| GADD45G | 0.979574 | 0.93737  | 1.023677 | 0.358359 |
| XPO7    | 1.039576 | 0.9749   | 1.108542 | 0.236289 |
| FAM98C  | 1.34255  | 1.200473 | 1.501442 | 2.45E-07 |
| SAFB2   | 1.009487 | 0.925982 | 1.100524 | 0.830278 |
| RPL36   | 0.947674 | 0.888996 | 1.010225 | 0.099348 |
| ATP8B3  | 1.190279 | 1.107735 | 1.278975 | 2.03E-06 |
| GTPBP3  | 1.233812 | 1.124466 | 1.353792 | 9.10E-06 |
| PLVAP   | 1.083324 | 1.024059 | 1.146018 | 0.0053   |
| BST2    | 1.222042 | 1.153111 | 1.295093 | 1.29E-11 |
| SLC27A1 | 0.972615 | 0.90051  | 1.050495 | 0.479866 |
| NSUN5   | 1.187983 | 1.082005 | 1.304341 | 0.000302 |
| USHBP1  | 1.101107 | 0.948078 | 1.278837 | 0.207101 |
| DDA1    | 1.005871 | 0.911941 | 1.109476 | 0.906833 |
| MRPL34  | 1.228299 | 1.109475 | 1.35985  | 7.46E-05 |
| PGLS    | 0.965876 | 0.869332 | 1.073142 | 0.518166 |
| LSM7    | 1.031715 | 0.938833 | 1.133785 | 0.516557 |
| TULP4   | 0.98106  | 0.923365 | 1.042359 | 0.536334 |
| SNX9    | 0.974911 | 0.930009 | 1.021981 | 0.290895 |
| RTN4IP1 | 1.124809 | 1.020255 | 1.240079 | 0.018137 |
| QRSL1   | 1.037121 | 0.942937 | 1.140712 | 0.453038 |
| RSPH3   | 1.069468 | 0.969907 | 1.179248 | 0.177947 |
| MLLT1   | 0.946542 | 0.879544 | 1.018642 | 0.142424 |
| FUT5    | 1.063419 | 0.971609 | 1.163906 | 0.181957 |
| ACTN4   | 0.965092 | 0.889369 | 1.047262 | 0.394051 |
| NDUFA10 | 1.002196 | 0.913735 | 1.099222 | 0.96289  |
| ARPC1B  | 1.094262 | 0.99579  | 1.202471 | 0.061168 |
| ZSWIM6  | 0.943767 | 0.889007 | 1.0019   | 0.057731 |
| FCHO1   | 0.981723 | 0.902844 | 1.067493 | 0.666002 |
| MAP1S   | 0.913521 | 0.843932 | 0.988847 | 0.025261 |
| KLHDC7B | 0.904808 | 0.851749 | 0.961172 | 0.001177 |
| PXDN    | 0.949456 | 0.912738 | 0.987652 | 0.009955 |
| SSBP4   | 1.00661  | 0.920087 | 1.101269 | 0.885754 |
| GDF15   | 1.027537 | 0.971369 | 1.086953 | 0.343575 |
| PGPEP1  | 1.031737 | 0.962746 | 1.105673 | 0.376266 |
| LSM4    | 1.281884 | 1.162338 | 1.413724 | 6.64E-07 |
| JUND    | 0.908162 | 0.836998 | 0.985376 | 0.020678 |
| HRC     | 1.119092 | 1.042486 | 1.201328 | 0.001871 |
| TRPM4   | 1.102149 | 1.066914 | 1.138548 | 4.44E-09 |
| SULT4A1 | 1.200735 | 1.118653 | 1.28884  | 4.11E-07 |
| ZNF557  | 1.178636 | 1.088008 | 1.276812 | 5.67E-05 |
| CRB3    | 1.182559 | 0.966327 | 1.447176 | 0.103629 |
| CAMSAP1 | 0.969208 | 0.895915 | 1.048497 | 0.435644 |
| UBAC1   | 1.111043 | 1.023544 | 1.206022 | 0.01187  |
| ZBTB46  | 0.976709 | 0.924566 | 1.031792 | 0.39984  |
| SAMD10  | 0.97729  | 0.900972 | 1.060072 | 0.579752 |

|         |          |          |          |          |
|---------|----------|----------|----------|----------|
| LSP1    | 1.124394 | 1.067103 | 1.184761 | 1.11E-05 |
| TNNT3   | 1.14254  | 1.073415 | 1.216117 | 2.85E-05 |
| TNNI2   | 1.118546 | 1.058995 | 1.181446 | 5.98E-05 |
| H19     | 0.95031  | 0.857069 | 1.053696 | 0.333399 |
| COL5A1  | 1.186445 | 1.125203 | 1.251021 | 2.57E-10 |
| ATXN10  | 1.086115 | 0.995088 | 1.18547  | 0.064355 |
| TUBGCP2 | 0.959015 | 0.871993 | 1.054721 | 0.388548 |
| CYP2E1  | 0.862067 | 0.768662 | 0.966823 | 0.011194 |
| PNPLA7  | 1.033867 | 0.954591 | 1.119728 | 0.413215 |
| HBZ     | 0.966617 | 0.911689 | 1.024855 | 0.255342 |
| PAK4    | 1.058914 | 0.952587 | 1.177108 | 0.289021 |
| MNX1    | 1.003323 | 0.913431 | 1.102061 | 0.944777 |
| ZNF337  | 0.966478 | 0.881937 | 1.059124 | 0.465359 |
| TAF4    | 1.003947 | 0.911881 | 1.105309 | 0.93602  |
| LAMA5   | 0.854148 | 0.80322  | 0.908306 | 5.01E-07 |
| OSBPL2  | 0.995728 | 0.923551 | 1.073546 | 0.911212 |
| ADRM1   | 0.859735 | 0.784812 | 0.94181  | 0.001159 |
| ASS1    | 0.982795 | 0.933363 | 1.034845 | 0.509827 |
| EXOSC2  | 1.089008 | 1.006022 | 1.17884  | 0.034995 |
| POMT1   | 1.102247 | 1.01618  | 1.195603 | 0.01893  |
| UCK1    | 1.141284 | 1.035556 | 1.257806 | 0.007714 |
| FIBCD1  | 0.699193 | 0.597378 | 0.818361 | 8.34E-06 |
| CHMP2A  | 0.968829 | 0.853873 | 1.099261 | 0.623139 |
| UBE2M   | 0.84104  | 0.754555 | 0.937438 | 0.001767 |
| TRIM28  | 0.948961 | 0.88047  | 1.02278  | 0.170489 |
| YIPF2   | 0.978729 | 0.892941 | 1.07276  | 0.645975 |
| ATG4D   | 1.014263 | 0.943962 | 1.0898   | 0.699186 |
| EIF2S3  | 0.90996  | 0.83738  | 0.988832 | 0.026095 |
| TMEM160 | 1.005295 | 0.925592 | 1.091861 | 0.900281 |
| ZC3H4   | 1.038662 | 0.968086 | 1.114383 | 0.290712 |
| NPAS1   | 1.113    | 1.00947  | 1.227148 | 0.031621 |
| GMFG    | 1.005885 | 0.91263  | 1.10867  | 0.905901 |
| MAP3K10 | 1.193158 | 1.096434 | 1.298413 | 4.23E-05 |
| LRRC47  | 1.092848 | 0.999264 | 1.195196 | 0.051914 |
| SESN2   | 1.022515 | 0.962915 | 1.085803 | 0.467443 |
| SMPDL3B | 1.157009 | 1.076024 | 1.244089 | 8.18E-05 |
| MED18   | 1.131048 | 1.035779 | 1.235081 | 0.006088 |
| CLIP1   | 0.979881 | 0.899668 | 1.067247 | 0.640926 |
| CCDC62  | 0.995434 | 0.903474 | 1.096755 | 0.926279 |
| HIP1R   | 0.971047 | 0.923397 | 1.021156 | 0.252433 |
| ZNF317  | 0.962781 | 0.884401 | 1.048109 | 0.381332 |
| PPAN    | 1.020318 | 0.932282 | 1.116668 | 0.662186 |
| EIF3G   | 0.935465 | 0.832944 | 1.050604 | 0.259984 |
| ANGPTL6 | 0.842104 | 0.782657 | 0.906066 | 4.21E-06 |
| DNMT1   | 1.132954 | 1.046647 | 1.226378 | 0.002017 |
| ZNF426  | 1.029818 | 0.950418 | 1.11585  | 0.472921 |
| SLC6A8  | 0.989057 | 0.944471 | 1.035749 | 0.64013  |
| DKC1    | 1.110669 | 1.013606 | 1.217025 | 0.024473 |
| PLXNA3  | 0.954898 | 0.896483 | 1.01712  | 0.151882 |
| MPP1    | 1.004811 | 0.931364 | 1.084051 | 0.901368 |
| ZNF331  | 0.960604 | 0.905782 | 1.018744 | 0.180056 |
| ZNF236  | 1.016276 | 0.938965 | 1.099951 | 0.68921  |
| LRP3    | 0.950521 | 0.908439 | 0.994552 | 0.028062 |
| NOL11   | 1.071055 | 0.984177 | 1.165604 | 0.111739 |
| UBE4B   | 0.983319 | 0.90153  | 1.072529 | 0.704204 |
| CASZ1   | 1.034401 | 0.966922 | 1.106589 | 0.325775 |
| PKDREJ  | 1.129313 | 0.997872 | 1.278067 | 0.054077 |
| HABP4   | 1.07939  | 0.984746 | 1.183132 | 0.102753 |

|           |          |          |          |          |
|-----------|----------|----------|----------|----------|
| SLC35D2   | 0.826827 | 0.74352  | 0.919468 | 0.000449 |
| PRRG1     | 1.329872 | 1.200765 | 1.472861 | 4.47E-08 |
| UBA1      | 0.989036 | 0.902461 | 1.083916 | 0.813529 |
| PPIL4     | 0.983427 | 0.903776 | 1.070098 | 0.698168 |
| ULBP2     | 1.059875 | 0.977905 | 1.148717 | 0.156796 |
| AKAP12    | 0.993589 | 0.914952 | 1.078985 | 0.878487 |
| SYNE1     | 1.114145 | 1.052388 | 1.179525 | 0.000203 |
| ULBP3     | 1.374044 | 1.245516 | 1.515834 | 2.27E-10 |
| LATS1     | 1.031565 | 0.948997 | 1.121318 | 0.465326 |
| EPS8L1    | 1.151724 | 1.064025 | 1.246652 | 0.000473 |
| LILRB2    | 1.092714 | 1.047501 | 1.139879 | 3.92E-05 |
| TTLL9     | 0.95659  | 0.819047 | 1.11723  | 0.575242 |
| RBM39     | 0.957733 | 0.890479 | 1.030067 | 0.245021 |
| ZNF341    | 0.995631 | 0.892342 | 1.110876 | 0.937548 |
| GGT7      | 1.123375 | 1.048132 | 1.204021 | 0.001006 |
| ACSS2     | 1.058539 | 0.975223 | 1.148973 | 0.173792 |
| EDA2R     | 1.130162 | 1.059374 | 1.20568  | 0.000209 |
| ARHGEF9   | 1.105495 | 1.006004 | 1.214825 | 0.037126 |
| HIGD1B    | 1.020861 | 0.957396 | 1.088533 | 0.528387 |
| ATP6V1E1  | 0.99231  | 0.881193 | 1.117439 | 0.898625 |
| ZNF227    | 1.06801  | 0.977066 | 1.167419 | 0.147334 |
| ZNF428    | 0.918458 | 0.841853 | 1.002033 | 0.055588 |
| ZNF141    | 0.984987 | 0.921086 | 1.053321 | 0.658483 |
| CCL25     | 1.254882 | 1.140815 | 1.380353 | 3.02E-06 |
| COX4I1    | 0.955226 | 0.869489 | 1.049418 | 0.339742 |
| GINS2     | 1.221046 | 1.121376 | 1.329575 | 4.29E-06 |
| CHMP1A    | 1.002075 | 0.91141  | 1.101758 | 0.965833 |
| SH3BGRL   | 1.034838 | 0.950822 | 1.126279 | 0.427962 |
| COX7B     | 0.926185 | 0.82901  | 1.034751 | 0.175125 |
| F12       | 1.218704 | 1.131817 | 1.312261 | 1.60E-07 |
| PRR7      | 1.071427 | 0.997144 | 1.151245 | 0.059844 |
| NFATC1    | 0.967204 | 0.893411 | 1.047092 | 0.410212 |
| CAP1      | 1.072166 | 0.979545 | 1.173546 | 0.130631 |
| PPT1      | 1.111635 | 1.037719 | 1.190817 | 0.002573 |
| RAB11FIP4 | 1.091475 | 1.021368 | 1.166393 | 0.009761 |
| ABCB7     | 0.958979 | 0.87887  | 1.04639  | 0.346647 |
| TRAF3     | 0.970926 | 0.903662 | 1.043197 | 0.420553 |
| HAUS8     | 1.240505 | 1.112898 | 1.382744 | 9.97E-05 |
| MRPS25    | 1.073294 | 0.989491 | 1.164195 | 0.088143 |
| SH3BP5    | 1.152821 | 1.086831 | 1.222818 | 2.26E-06 |
| HACL1     | 0.997787 | 0.90908  | 1.09515  | 0.962802 |
| TBC1D5    | 1.01491  | 0.949029 | 1.085365 | 0.665593 |
| CAPN7     | 1.057396 | 0.986795 | 1.133047 | 0.113436 |
| RFTN1     | 1.086657 | 1.015218 | 1.163122 | 0.016608 |
| SLC6A6    | 0.972385 | 0.909907 | 1.039152 | 0.408526 |
| KCNC3     | 1.140576 | 1.088982 | 1.194614 | 2.56E-08 |
| NAPSA     | 1.170291 | 1.067222 | 1.283314 | 0.000829 |
| NAPSB     | 1.066569 | 1.030804 | 1.103575 | 0.000213 |
| NR1H2     | 0.963159 | 0.868116 | 1.068608 | 0.478861 |
| LRRC4B    | 1.016044 | 0.909147 | 1.135511 | 0.778991 |
| PDLIM4    | 0.963413 | 0.910596 | 1.019294 | 0.195092 |
| KIF3A     | 1.252703 | 1.137798 | 1.379211 | 4.43E-06 |
| MGAT1     | 0.998293 | 0.918341 | 1.085206 | 0.968006 |
| TUBG1     | 1.189022 | 1.108179 | 1.275763 | 1.44E-06 |
| PSME3     | 1.116592 | 1.000701 | 1.245905 | 0.048553 |
| RPL27     | 0.947904 | 0.893093 | 1.006078 | 0.078313 |
| PSMC3IP   | 1.047985 | 0.958718 | 1.145564 | 0.302144 |
| AOC3      | 0.987946 | 0.906569 | 1.076627 | 0.782153 |

|         |          |          |          |          |
|---------|----------|----------|----------|----------|
| ACLY    | 1.11838  | 1.03662  | 1.206588 | 0.003871 |
| VPS25   | 1.241156 | 1.130644 | 1.362469 | 5.61E-06 |
| RAMP2   | 1.051591 | 0.870111 | 1.270924 | 0.602744 |
| AOC2    | 1.018619 | 0.94713  | 1.095504 | 0.619272 |
| NDUFA2  | 1.17772  | 1.081382 | 1.28264  | 0.000172 |
| ANKHD1  | 1.033505 | 0.94974  | 1.124657 | 0.444747 |
| DIAPH1  | 0.861443 | 0.804462 | 0.92246  | 1.94E-05 |
| NDFIP1  | 1.15677  | 1.080751 | 1.238135 | 2.68E-05 |
| UBE2D2  | 0.917167 | 0.823132 | 1.021945 | 0.117198 |
| EXOC4   | 1.016782 | 0.949292 | 1.08907  | 0.634839 |
| ACAP3   | 1.020103 | 0.949643 | 1.095792 | 0.585719 |
| PPFIA1  | 1.035289 | 0.953619 | 1.123954 | 0.408117 |
| TMEM204 | 1.036102 | 0.964936 | 1.112517 | 0.328641 |
| KREMEN2 | 1.050752 | 0.947141 | 1.165698 | 0.349962 |
| THOC6   | 1.030361 | 0.949296 | 1.118348 | 0.474374 |
| TRAF7   | 0.853371 | 0.786216 | 0.926261 | 0.00015  |
| BARX1   | 1.366111 | 1.163663 | 1.603778 | 0.000138 |
| NINJ1   | 1.018788 | 0.965115 | 1.075445 | 0.500262 |
| CA6     | 1.056327 | 0.962907 | 1.15881  | 0.246096 |
| NPHP4   | 1.004499 | 0.924721 | 1.09116  | 0.915326 |
| MAP1B   | 1.180175 | 1.075011 | 1.295626 | 0.000503 |
| IL13RA1 | 0.992995 | 0.947714 | 1.040439 | 0.767831 |
| WDR44   | 0.93314  | 0.858518 | 1.014249 | 0.103682 |
| CKMT2   | 1.057472 | 0.975845 | 1.145928 | 0.172759 |
| ZCCHC9  | 1.118471 | 0.995938 | 1.25608  | 0.058595 |
| TOP2A   | 1.116872 | 1.063455 | 1.172973 | 9.85E-06 |
| STARD3  | 1.016854 | 0.920104 | 1.123777 | 0.743187 |
| RARA    | 0.941416 | 0.876795 | 1.010799 | 0.09613  |
| PPP1R1B | 0.923716 | 0.803629 | 1.061748 | 0.264109 |
| KHDRBS3 | 1.001008 | 0.910405 | 1.100627 | 0.983397 |
| CHD1L   | 1.002077 | 0.927968 | 1.082105 | 0.957788 |
| PEX11B  | 1.033755 | 0.949469 | 1.125524 | 0.444251 |
| FMO5    | 1.136193 | 1.045865 | 1.234321 | 0.002519 |
| PIAS3   | 1.27901  | 1.144182 | 1.429727 | 1.49E-05 |
| PRKAB2  | 1.051131 | 0.982176 | 1.124927 | 0.149737 |
| PDHA1   | 1.030411 | 0.93435  | 1.136347 | 0.548516 |
| RAI2    | 1.163337 | 1.062037 | 1.2743   | 0.001135 |
| MCCC2   | 1.102933 | 1.019838 | 1.192798 | 0.014226 |
| ZNF304  | 1.01657  | 0.945166 | 1.093369 | 0.658283 |
| ZSCAN5A | 1.045445 | 0.939957 | 1.162772 | 0.412819 |
| ZNF132  | 1.033148 | 0.95765  | 1.114599 | 0.399626 |
| CHSY1   | 0.938698 | 0.879966 | 1.00135  | 0.054979 |
| SNRPA1  | 0.980006 | 0.906392 | 1.0596   | 0.612212 |
| LLGL1   | 1.009329 | 0.931002 | 1.094246 | 0.821741 |
| THAP1   | 1.080203 | 0.963537 | 1.210994 | 0.18584  |
| ACTR10  | 0.98636  | 0.886253 | 1.097774 | 0.801404 |
| ABHD12B | 0.897237 | 0.83656  | 0.962316 | 0.002404 |
| GCH1    | 1.113334 | 1.048166 | 1.182554 | 0.000486 |
| LGALS3  | 1.028226 | 0.980828 | 1.077914 | 0.247686 |
| PODNL1  | 1.371266 | 1.158573 | 1.623007 | 0.000241 |
| DNAJB1  | 1.004266 | 0.937212 | 1.076118 | 0.903899 |
| ZSWIM4  | 0.939587 | 0.875746 | 1.008081 | 0.082605 |
| FBXW9   | 0.96958  | 0.886641 | 1.060277 | 0.498349 |
| RFX1    | 0.964267 | 0.884164 | 1.051627 | 0.410892 |
| ZNF20   | 1.10664  | 0.990943 | 1.235846 | 0.072101 |
| DCAF15  | 0.989431 | 0.904597 | 1.082222 | 0.816301 |
| CC2D1A  | 1.214372 | 1.107607 | 1.331429 | 3.52E-05 |
| TRIM21  | 1.154478 | 1.060664 | 1.256589 | 0.000894 |



|          |          |          |          |          |
|----------|----------|----------|----------|----------|
| SPATA6   | 1.183234 | 1.10667  | 1.265096 | 8.24E-07 |
| LRRRC41  | 1.013524 | 0.925835 | 1.10952  | 0.771083 |
| CCT6B    | 1.066829 | 0.969389 | 1.174063 | 0.185576 |
| DHX30    | 1.014387 | 0.925611 | 1.111677 | 0.759844 |
| RAF1     | 0.963864 | 0.892496 | 1.040938 | 0.348384 |
| PPARG    | 1.036032 | 0.978021 | 1.097485 | 0.228577 |
| NUP210   | 1.137299 | 1.074387 | 1.203895 | 9.37E-06 |
| FCRLA    | 1.037367 | 0.972562 | 1.106489 | 0.265001 |
| HSD17B7  | 1.153415 | 1.052803 | 1.263642 | 0.002177 |
| ENOSF1   | 1.063779 | 0.991636 | 1.14117  | 0.084426 |
| EMILIN2  | 0.885584 | 0.841728 | 0.931724 | 2.75E-06 |
| ARFIP2   | 1.070667 | 0.961294 | 1.192483 | 0.21425  |
| TRIM5    | 0.97909  | 0.908835 | 1.054776 | 0.578054 |
| CNGA4    | 1.037889 | 0.911535 | 1.181759 | 0.574466 |
| TRIM22   | 0.990038 | 0.931051 | 1.052763 | 0.749402 |
| RRP8     | 1.007729 | 0.937943 | 1.082708 | 0.833451 |
| EFR3A    | 0.943064 | 0.887271 | 1.002365 | 0.05956  |
| PTCD3    | 1.028845 | 0.95753  | 1.105472 | 0.437823 |
| IMMT     | 1.006699 | 0.910896 | 1.112577 | 0.895895 |
| MRPL35   | 1.10159  | 0.996866 | 1.217314 | 0.057646 |
| ILKAP    | 0.990121 | 0.92202  | 1.063252 | 0.784795 |
| PER2     | 1.012494 | 0.93453  | 1.096961 | 0.761349 |
| RAMP1    | 0.924537 | 0.884315 | 0.966589 | 0.000545 |
| SCLY     | 1.230378 | 1.073561 | 1.410101 | 0.002879 |
| PTPRE    | 0.985404 | 0.932918 | 1.040843 | 0.598534 |
| RAN      | 1.234876 | 1.106588 | 1.378037 | 0.000163 |
| PRKAA1   | 1.093878 | 1.003915 | 1.191902 | 0.040443 |
| CARD6    | 0.966332 | 0.902662 | 1.034492 | 0.324702 |
| INPP5K   | 1.021096 | 0.928715 | 1.122667 | 0.666118 |
| MYBBP1A  | 1.065311 | 0.99375  | 1.142025 | 0.074547 |
| RPA1     | 1.139381 | 1.054754 | 1.230798 | 0.000921 |
| SERPINF1 | 0.967956 | 0.911374 | 1.028052 | 0.289257 |
| UBE2G1   | 0.995718 | 0.909819 | 1.089727 | 0.925724 |
| EEFSEC   | 1.098245 | 1.010541 | 1.19356  | 0.027322 |
| TBC1D14  | 0.970793 | 0.904794 | 1.041607 | 0.409277 |
| TMEM128  | 1.123624 | 1.017626 | 1.240662 | 0.021134 |
| COQ3     | 1.236752 | 1.125816 | 1.358619 | 9.36E-06 |
| SEC61G   | 0.952404 | 0.874045 | 1.037787 | 0.2656   |
| LANCL2   | 0.984013 | 0.906474 | 1.068185 | 0.700348 |
| FIGNL1   | 1.108782 | 1.030171 | 1.193393 | 0.005919 |
| GRSF1    | 0.923229 | 0.838934 | 1.015994 | 0.102019 |
| ANKRD17  | 0.988837 | 0.923746 | 1.058515 | 0.74661  |
| UTP3     | 1.222789 | 1.112863 | 1.343572 | 2.85E-05 |
| ITGB4    | 0.802677 | 0.754874 | 0.853508 | 2.28E-12 |
| WBP2     | 0.973713 | 0.869575 | 1.090322 | 0.644378 |
| UNK      | 0.987767 | 0.897409 | 1.087223 | 0.801457 |
| TRIM47   | 0.795541 | 0.728328 | 0.868956 | 3.80E-07 |
| ZRANB2   | 1.078448 | 1.003668 | 1.1588   | 0.039416 |
| EIF5A    | 1.059027 | 0.943629 | 1.188536 | 0.329922 |
| KDM6B    | 0.924886 | 0.859908 | 0.994773 | 0.035643 |
| CLEC10A  | 0.961454 | 0.922471 | 1.002083 | 0.062687 |
| GUCY2D   | 1.158025 | 1.057643 | 1.267935 | 0.001517 |
| GPS2     | 1.03312  | 0.894028 | 1.193852 | 0.658747 |
| XAF1     | 1.076505 | 1.014741 | 1.142028 | 0.01447  |
| DLG4     | 0.982632 | 0.912725 | 1.057893 | 0.641703 |
| VPS13B   | 1.025881 | 0.967592 | 1.08768  | 0.391925 |
| MATN2    | 0.971705 | 0.894066 | 1.056086 | 0.499312 |
| REEP2    | 0.938702 | 0.836118 | 1.053871 | 0.284018 |

|          |          |          |          |          |
|----------|----------|----------|----------|----------|
| PCBD2    | 1.094683 | 0.999365 | 1.199092 | 0.05162  |
| SDF2     | 1.026212 | 0.915142 | 1.150762 | 0.657976 |
| FLOT2    | 1.044901 | 0.971778 | 1.123526 | 0.235397 |
| ERAL1    | 1.186984 | 1.070909 | 1.315641 | 0.001096 |
| PRMT7    | 1.139897 | 1.051583 | 1.235628 | 0.001461 |
| NIP7     | 1.02719  | 0.933942 | 1.129749 | 0.580605 |
| TERF2    | 0.954922 | 0.868863 | 1.049504 | 0.338448 |
| VPS4A    | 0.983436 | 0.891636 | 1.084686 | 0.738322 |
| HSPA12B  | 1.020718 | 0.944979 | 1.102527 | 0.602161 |
| BTBD3    | 1.100278 | 1.018589 | 1.188518 | 0.015186 |
| PCNA     | 1.139024 | 1.062846 | 1.220661 | 0.000228 |
| NXT1     | 1.048894 | 0.955788 | 1.151069 | 0.314169 |
| POLR3F   | 1.020409 | 0.930884 | 1.118544 | 0.666295 |
| RIN2     | 1.146008 | 1.076619 | 1.219868 | 1.90E-05 |
| PTPRA    | 1.035731 | 0.933887 | 1.148682 | 0.506194 |
| DAP3     | 1.061939 | 0.927785 | 1.215491 | 0.383122 |
| ARHGEF11 | 1.070818 | 1.024296 | 1.119452 | 0.002534 |
| FCRL2    | 1.002551 | 0.93334  | 1.076895 | 0.944338 |
| SYT11    | 0.95779  | 0.894056 | 1.026067 | 0.219627 |
| IGHMBP2  | 0.970338 | 0.897899 | 1.048621 | 0.44687  |
| ACY3     | 0.958278 | 0.919918 | 0.998237 | 0.04089  |
| MMACHC   | 1.152233 | 1.059848 | 1.252672 | 0.00089  |
| DPH2     | 1.159886 | 1.079085 | 1.246737 | 5.67E-05 |
| TOE1     | 1.213035 | 1.101743 | 1.335569 | 8.38E-05 |
| NASP     | 1.04374  | 0.950814 | 1.145748 | 0.368206 |
| MUTYH    | 1.2265   | 1.081822 | 1.390527 | 0.001432 |
| CTNBL1   | 0.908199 | 0.83488  | 0.987958 | 0.024957 |
| LPIN3    | 1.224668 | 1.136224 | 1.319998 | 1.16E-07 |
| ZSWIM3   | 1.09416  | 1.008776 | 1.186771 | 0.029951 |
| RBM38    | 1.00085  | 0.948679 | 1.055891 | 0.97518  |
| VSTM2L   | 0.94306  | 0.828879 | 1.07297  | 0.373282 |
| SERINC3  | 0.971516 | 0.900531 | 1.048098 | 0.455386 |
| PPP1R3D  | 1.130445 | 1.042634 | 1.22565  | 0.002959 |
| AP3B1    | 0.982422 | 0.914258 | 1.055669 | 0.628839 |
| ZBED3    | 0.948769 | 0.883987 | 1.0183   | 0.145002 |
| ANGPTL3  | 1.020821 | 0.924529 | 1.127142 | 0.683529 |
| FBXO44   | 1.313882 | 1.220352 | 1.41458  | 4.31E-13 |
| CASP9    | 0.972311 | 0.886176 | 1.066819 | 0.552983 |
| DCTN4    | 0.925849 | 0.865135 | 0.990825 | 0.025992 |
| PDE6A    | 0.9699   | 0.853632 | 1.102005 | 0.638999 |
| MTUS2    | 0.96272  | 0.875017 | 1.059213 | 0.435637 |
| ZMYM5    | 0.90753  | 0.832136 | 0.989756 | 0.028333 |
| USPL1    | 0.973297 | 0.900096 | 1.052451 | 0.497471 |
| XPO4     | 0.97608  | 0.90808  | 1.049171 | 0.511094 |
| POMP     | 1.20172  | 1.092641 | 1.321687 | 0.000154 |
| CDK8     | 0.910379 | 0.83846  | 0.988466 | 0.025334 |
| ALOX5AP  | 1.065742 | 1.019826 | 1.113724 | 0.004601 |
| WASF3    | 1.274101 | 1.145694 | 1.416899 | 7.84E-06 |
| GPR12    | 0.663596 | 0.596143 | 0.73868  | 6.47E-14 |
| MYH10    | 1.015776 | 0.958515 | 1.076459 | 0.596977 |
| PEMT     | 1.049959 | 0.963631 | 1.144021 | 0.265424 |
| SCO1     | 1.015132 | 0.93174  | 1.105987 | 0.731304 |
| MPRIIP   | 0.961678 | 0.895481 | 1.03277  | 0.282891 |
| CHI3L1   | 0.990868 | 0.955677 | 1.027354 | 0.619016 |
| MYBPH    | 0.964831 | 0.899276 | 1.035165 | 0.31863  |
| PIK3C2B  | 1.072194 | 1.012138 | 1.135814 | 0.017778 |
| DSTYK    | 0.98396  | 0.914792 | 1.058358 | 0.663697 |
| CHIT1    | 1.135476 | 1.071877 | 1.202849 | 1.56E-05 |

|          |          |          |          |          |
|----------|----------|----------|----------|----------|
| SLC41A1  | 1.125008 | 1.058056 | 1.196197 | 0.000168 |
| LGR6     | 1.090132 | 0.997608 | 1.191237 | 0.056517 |
| TMCC2    | 0.9968   | 0.960404 | 1.034576 | 0.865897 |
| CCNA1    | 0.977935 | 0.946512 | 1.010402 | 0.180579 |
| COG6     | 1.074376 | 0.991237 | 1.164489 | 0.080848 |
| RXFP2    | 0.934821 | 0.888462 | 0.9836   | 0.0094   |
| EPST11   | 1.063049 | 1.014262 | 1.114183 | 0.010749 |
| RFXAP    | 1.17863  | 1.073361 | 1.294224 | 0.000575 |
| TPT1     | 0.846936 | 0.778344 | 0.921573 | 0.000116 |
| RFC3     | 1.05644  | 0.979925 | 1.13893  | 0.152339 |
| STARD13  | 0.998207 | 0.908025 | 1.097346 | 0.970373 |
| MORC4    | 1.418299 | 1.300978 | 1.546201 | 2.15E-15 |
| BEX2     | 1.105731 | 1.057685 | 1.155959 | 9.24E-06 |
| TCEAL4   | 1.06689  | 1.002823 | 1.13505  | 0.040443 |
| BEX1     | 0.989096 | 0.957551 | 1.02168  | 0.507352 |
| FAM104A  | 1.155353 | 1.055669 | 1.264449 | 0.001708 |
| SLC39A11 | 1.103349 | 1.0439   | 1.166185 | 0.000501 |
| EPHB2    | 0.985466 | 0.878339 | 1.105659 | 0.803093 |
| SRRM1    | 0.97063  | 0.876845 | 1.074446 | 0.565308 |
| BTBD2    | 1.039256 | 0.956827 | 1.128787 | 0.361112 |
| PRAM1    | 0.929197 | 0.878715 | 0.982581 | 0.00998  |
| ZNF414   | 0.914098 | 0.822462 | 1.015943 | 0.095616 |
| PDE6B    | 1.064391 | 0.97539  | 1.161514 | 0.161313 |
| HSPBP1   | 1.068739 | 0.990011 | 1.153727 | 0.088601 |
| CSNK1G2  | 0.958615 | 0.878205 | 1.046387 | 0.344373 |
| CNDP2    | 1.013685 | 0.939471 | 1.093761 | 0.726052 |
| MACROD1  | 0.996913 | 0.920354 | 1.079841 | 0.939553 |
| WDR74    | 0.932099 | 0.865647 | 1.003652 | 0.062412 |
| LGALS12  | 1.004093 | 0.961276 | 1.048817 | 0.854246 |
| RTN3     | 0.966865 | 0.887284 | 1.053584 | 0.441954 |
| MYH11    | 0.90534  | 0.843014 | 0.972275 | 0.006284 |
| MED10    | 1.265401 | 1.14368  | 1.400077 | 5.08E-06 |
| PDZD2    | 1.161904 | 1.071853 | 1.259522 | 0.000267 |
| MORC2    | 1.097875 | 1.009282 | 1.194246 | 0.029616 |
| MYO18B   | 0.982557 | 0.948145 | 1.018219 | 0.333349 |
| SLC2A11  | 1.249961 | 1.116872 | 1.398908 | 0.000103 |
| C1QTNF6  | 1.243931 | 1.129147 | 1.370383 | 9.92E-06 |
| FAM83F   | 1.010695 | 0.920112 | 1.110194 | 0.824276 |
| SEC14L4  | 1.030802 | 0.972502 | 1.092598 | 0.307121 |
| GIMAP6   | 1.052772 | 0.999232 | 1.109182 | 0.053471 |
| GIMAP4   | 0.979847 | 0.929385 | 1.033047 | 0.45042  |
| ADCK2    | 1.159516 | 1.060112 | 1.26824  | 0.00121  |
| MKRN1    | 0.926488 | 0.858648 | 0.999687 | 0.049064 |
| AGAP3    | 0.929883 | 0.876273 | 0.986773 | 0.016419 |
| KRBA1    | 0.934154 | 0.858756 | 1.016172 | 0.112665 |
| ACTR3B   | 1.053881 | 0.955953 | 1.16184  | 0.291579 |
| BTG1     | 0.903671 | 0.846957 | 0.964184 | 0.002192 |
| ATP13A3  | 0.946943 | 0.892458 | 1.004753 | 0.07137  |
| KRAS     | 0.953492 | 0.885981 | 1.026147 | 0.2037   |
| IPO8     | 1.064823 | 0.990993 | 1.144153 | 0.086683 |
| IMPA1    | 1.008927 | 0.923957 | 1.101711 | 0.843047 |
| LRRCC1   | 1.22089  | 1.134449 | 1.313916 | 9.99E-08 |
| E2F5     | 1.10867  | 1.011705 | 1.214929 | 0.027163 |
| CA1      | 1.003274 | 0.974545 | 1.032849 | 0.825488 |
| CCDC59   | 0.908687 | 0.827629 | 0.997684 | 0.044579 |
| SWAP70   | 0.888049 | 0.828335 | 0.952067 | 0.000829 |
| ARNTL    | 1.091276 | 1.028049 | 1.158392 | 0.004126 |
| LYVE1    | 1.076291 | 0.977636 | 1.1849   | 0.13391  |

|           |          |          |          |          |
|-----------|----------|----------|----------|----------|
| AMPD3     | 1.078654 | 1.019573 | 1.141158 | 0.008429 |
| SBF2      | 0.965157 | 0.900375 | 1.0346   | 0.317099 |
| MICAL2    | 1.068922 | 1.008175 | 1.13333  | 0.025568 |
| RRAS2     | 0.944333 | 0.894486 | 0.996958 | 0.038445 |
| HSD17B4   | 1.098114 | 1.019914 | 1.182309 | 0.013024 |
| ZFC3H1    | 0.961093 | 0.90319  | 1.022707 | 0.210665 |
| RNF122    | 0.912612 | 0.854429 | 0.974757 | 0.006516 |
| DPF2      | 0.992592 | 0.894086 | 1.10195  | 0.889104 |
| MEN1      | 1.087455 | 1.002566 | 1.179532 | 0.043201 |
| NUMB      | 0.88312  | 0.810587 | 0.962143 | 0.004475 |
| COX16     | 1.287689 | 1.145326 | 1.447747 | 2.34E-05 |
| TTC9      | 0.896216 | 0.837688 | 0.958832 | 0.001473 |
| MED6      | 0.987587 | 0.911611 | 1.069895 | 0.759739 |
| EIF2S1    | 1.138633 | 1.042146 | 1.244053 | 0.004056 |
| ADAM20    | 1.01667  | 0.918796 | 1.12497  | 0.748881 |
| LOXL2     | 1.022547 | 0.929842 | 1.124495 | 0.645642 |
| ELP3      | 1.063949 | 0.989138 | 1.144418 | 0.095641 |
| ADAMDEC   | 1.08555  | 1.000337 | 1.17802  | 0.049062 |
| MBD2      | 0.954034 | 0.856748 | 1.062367 | 0.39117  |
| IER3IP1   | 1.069487 | 0.974865 | 1.173293 | 0.155213 |
| MRPS36    | 1.027988 | 0.925108 | 1.14231  | 0.607902 |
| CCNB1     | 1.155436 | 1.08088  | 1.235136 | 2.18E-05 |
| CDK7      | 1.017383 | 0.918002 | 1.127523 | 0.742453 |
| CD180     | 1.032908 | 0.986607 | 1.081382 | 0.166447 |
| IRAK2     | 0.989156 | 0.942096 | 1.038567 | 0.661094 |
| CAMK1     | 1.310426 | 1.203071 | 1.42736  | 5.67E-10 |
| THUMPD3   | 1.088112 | 0.989298 | 1.196796 | 0.08213  |
| VHL       | 1.087725 | 0.989866 | 1.195258 | 0.080429 |
| ARL8B     | 0.906446 | 0.835462 | 0.983461 | 0.018236 |
| EDEM1     | 0.916402 | 0.86163  | 0.974656 | 0.005497 |
| MEIS2     | 1.023897 | 0.941551 | 1.113445 | 0.580907 |
| GNAT2     | 1.023527 | 0.964222 | 1.08648  | 0.445098 |
| GSTM1     | 1.057216 | 1.016527 | 1.099534 | 0.00546  |
| PRPF38B   | 1.041705 | 0.938372 | 1.156417 | 0.443338 |
| TSPAN2    | 1.110273 | 1.062412 | 1.16029  | 3.27E-06 |
| TSHB      | 1.29001  | 1.143704 | 1.455033 | 3.38E-05 |
| GSTM5     | 1.132702 | 1.054838 | 1.216313 | 0.000605 |
| GSTM3     | 1.142683 | 1.073316 | 1.216533 | 2.99E-05 |
| VAV3      | 1.007841 | 0.948803 | 1.070552 | 0.799819 |
| PSRC1     | 1.195191 | 1.119266 | 1.276266 | 1.01E-07 |
| PTPN22    | 1.075076 | 1.007295 | 1.147417 | 0.029352 |
| SORT1     | 1.109911 | 1.066032 | 1.155596 | 4.04E-07 |
| WNT2B     | 1.13135  | 0.991957 | 1.290331 | 0.065828 |
| PTGFRN    | 0.996218 | 0.932963 | 1.06376  | 0.909853 |
| NOTCH2    | 1.009057 | 0.952993 | 1.06842  | 0.757208 |
| TRIM45    | 1.19241  | 1.096125 | 1.297154 | 4.19E-05 |
| CEPT1     | 1.024346 | 0.952252 | 1.101898 | 0.51827  |
| AP4B1     | 1.100887 | 0.996422 | 1.216304 | 0.058825 |
| NAPG      | 0.972084 | 0.895767 | 1.054904 | 0.497328 |
| SPIRE1    | 1.163065 | 1.090539 | 1.240415 | 4.26E-06 |
| PPHLN1    | 0.967358 | 0.885561 | 1.056712 | 0.461596 |
| FKBP11    | 1.164501 | 1.061622 | 1.27735  | 0.001251 |
| ARF3      | 1.136713 | 1.050358 | 1.230167 | 0.001479 |
| TMEM106   | 1.259558 | 1.172651 | 1.352906 | 2.51E-10 |
| SLC38A2   | 0.915369 | 0.856754 | 0.977995 | 0.00882  |
| YWHAQ     | 0.975415 | 0.882393 | 1.078245 | 0.626423 |
| KIDINS220 | 1.064647 | 0.984483 | 1.151338 | 0.116783 |
| GRHL1     | 1.321645 | 1.213717 | 1.43917  | 1.40E-10 |

|         |          |          |          |          |
|---------|----------|----------|----------|----------|
| ROCK2   | 1.03356  | 0.967658 | 1.10395  | 0.326125 |
| RSAD2   | 1.044465 | 0.996472 | 1.094769 | 0.069879 |
| MYCN    | 1.014733 | 0.981388 | 1.04921  | 0.390938 |
| LPIN1   | 1.059669 | 0.990138 | 1.134083 | 0.094183 |
| CMPK2   | 1.054316 | 1.000549 | 1.110972 | 0.047646 |
| IAH1    | 1.082558 | 0.952166 | 1.230806 | 0.225732 |
| LDHA    | 0.902525 | 0.831994 | 0.979034 | 0.013499 |
| IL6ST   | 0.961797 | 0.911785 | 1.014551 | 0.152798 |
| FST     | 0.940658 | 0.831628 | 1.063983 | 0.33042  |
| NAV1    | 1.024869 | 0.966135 | 1.087173 | 0.414611 |
| CDC73   | 1.000441 | 0.929186 | 1.077161 | 0.990659 |
| TIMM17A | 1.154253 | 1.044902 | 1.275046 | 0.004729 |
| RPS15A  | 0.877421 | 0.793413 | 0.970324 | 0.010877 |
| RBM17   | 1.023665 | 0.913076 | 1.147647 | 0.688439 |
| IL2RA   | 1.090958 | 1.032696 | 1.152506 | 0.001878 |
| ANKRD16 | 1.085009 | 0.991755 | 1.187031 | 0.075174 |
| ECHDC3  | 1.052123 | 0.986855 | 1.121707 | 0.119948 |
| IL15RA  | 0.951947 | 0.885745 | 1.023098 | 0.180557 |
| CCNH    | 0.981153 | 0.910539 | 1.057244 | 0.617595 |
| HRH4    | 0.912449 | 0.835214 | 0.996826 | 0.042315 |
| KCTD1   | 0.985812 | 0.907062 | 1.071399 | 0.736573 |
| CABLES1 | 1.032444 | 0.981441 | 1.086097 | 0.216742 |
| DOCK2   | 0.913093 | 0.857748 | 0.97201  | 0.004374 |
| EMP1    | 0.949776 | 0.911893 | 0.989232 | 0.01309  |
| SOX5    | 1.213233 | 1.113231 | 1.322217 | 1.06E-05 |
| KLRD1   | 1.064961 | 0.970338 | 1.168811 | 0.184934 |
| KLRC1   | 1.211213 | 1.083028 | 1.35457  | 0.000787 |
| PRH2    | 1.065727 | 0.982575 | 1.155915 | 0.124575 |
| LRP4    | 0.785533 | 0.722497 | 0.85407  | 1.55E-08 |
| MYBPC3  | 1.060854 | 0.974726 | 1.154593 | 0.171493 |
| DDB2    | 1.160779 | 1.06359  | 1.26685  | 0.000832 |
| ACP2    | 1.098307 | 1.00399  | 1.201484 | 0.040669 |
| RAB33A  | 0.992324 | 0.941104 | 1.046331 | 0.775646 |
| RBMX2   | 1.055113 | 0.936991 | 1.188126 | 0.375827 |
| PIWIL4  | 0.949729 | 0.900809 | 1.001306 | 0.05593  |
| PUM1    | 0.942585 | 0.88228  | 1.007011 | 0.079628 |
| PHC2    | 0.902835 | 0.833804 | 0.977583 | 0.011781 |
| CDCA8   | 1.115323 | 1.046838 | 1.188289 | 0.000736 |
| GNL2    | 0.976925 | 0.885543 | 1.077738 | 0.641293 |
| HOOK1   | 1.144067 | 1.064226 | 1.229898 | 0.000266 |
| BTF3L4  | 0.993012 | 0.901484 | 1.093834 | 0.886978 |
| PRPF38A | 0.888887 | 0.8191   | 0.96462  | 0.004751 |
| DSC2    | 0.975036 | 0.926532 | 1.026078 | 0.331504 |
| RNF138  | 0.938467 | 0.86212  | 1.021576 | 0.142403 |
| ELP2    | 0.992906 | 0.925077 | 1.065708 | 0.843675 |
| DSC3    | 1.073506 | 0.924784 | 1.246145 | 0.351215 |
| DTNA    | 1.059002 | 0.987068 | 1.136178 | 0.1102   |
| DAGLA   | 0.906649 | 0.843835 | 0.974138 | 0.007468 |
| SLC43A3 | 1.109395 | 1.026648 | 1.19881  | 0.008667 |
| TIMM10  | 1.130744 | 1.03423  | 1.236263 | 0.006947 |
| DHX34   | 1.01816  | 0.940452 | 1.102288 | 0.656829 |
| APLNR   | 1.089571 | 0.926191 | 1.281772 | 0.300703 |
| FADS2   | 1.101712 | 1.046188 | 1.160184 | 0.000241 |
| TCN1    | 0.969251 | 0.937776 | 1.001783 | 0.06371  |
| TMEM165 | 0.987459 | 0.916401 | 1.064027 | 0.740487 |
| CLOCK   | 1.027002 | 0.947808 | 1.112814 | 0.515201 |
| COL4A2  | 1.055095 | 0.920571 | 1.209278 | 0.440895 |
| CLDN10  | 0.979144 | 0.89907  | 1.06635  | 0.628258 |

|         |          |          |          |          |
|---------|----------|----------|----------|----------|
| UBAC2   | 1.00397  | 0.915896 | 1.100514 | 0.932591 |
| ARGLU1  | 0.994767 | 0.911583 | 1.085542 | 0.906258 |
| BIVM    | 1.166895 | 1.086459 | 1.253285 | 2.28E-05 |
| ERCC5   | 1.02907  | 0.943342 | 1.12259  | 0.518475 |
| TPP2    | 0.97143  | 0.912094 | 1.034625 | 0.367369 |
| CARS2   | 1.004859 | 0.917519 | 1.100513 | 0.916784 |
| STT3A   | 1.099718 | 1.018954 | 1.186884 | 0.014589 |
| ACRV1   | 1.14291  | 1.022398 | 1.277628 | 0.018795 |
| ETS1    | 0.996714 | 0.948346 | 1.047548 | 0.896806 |
| SLC37A2 | 1.097685 | 1.033377 | 1.165996 | 0.002479 |
| KLB     | 0.9649   | 0.900442 | 1.033973 | 0.311113 |
| TMED7   | 0.949388 | 0.883213 | 1.020521 | 0.158859 |
| APC     | 1.01641  | 0.943733 | 1.094683 | 0.667188 |
| WDR36   | 1.096962 | 1.018781 | 1.181144 | 0.01416  |
| OSTF1   | 1.000529 | 0.927708 | 1.079066 | 0.989054 |
| RFK     | 1.094534 | 0.998946 | 1.199267 | 0.052702 |
| UBQLN1  | 0.942473 | 0.873531 | 1.016856 | 0.126346 |
| ANXA1   | 0.927264 | 0.889991 | 0.966099 | 0.000309 |
| AGTPBP1 | 0.846631 | 0.800879 | 0.894996 | 4.26E-09 |
| GOLM1   | 1.018782 | 0.949639 | 1.09296  | 0.603808 |
| PSAT1   | 1.185647 | 1.120327 | 1.254775 | 3.87E-09 |
| ISCA1   | 1.005052 | 0.926095 | 1.090741 | 0.903915 |
| ADAM19  | 0.998525 | 0.946122 | 1.053831 | 0.957207 |
| HAVCR2  | 0.857282 | 0.81456  | 0.902246 | 3.55E-09 |
| CCNJL   | 1.111569 | 1.033546 | 1.195482 | 0.004392 |
| TAOK3   | 0.899253 | 0.828648 | 0.975874 | 0.010917 |
| USP30   | 0.97761  | 0.900557 | 1.061256 | 0.588779 |
| SDS     | 1.222191 | 1.129512 | 1.322474 | 6.14E-07 |
| HNF1A   | 0.967494 | 0.832084 | 1.124939 | 0.667501 |
| FBXO21  | 1.18667  | 1.109958 | 1.268683 | 5.18E-07 |
| OASL    | 1.023588 | 0.979925 | 1.069197 | 0.29454  |
| HRK     | 1.211878 | 1.097356 | 1.338353 | 0.000148 |
| RNFT2   | 0.987761 | 0.923323 | 1.056696 | 0.720515 |
| P2RX4   | 0.919018 | 0.852308 | 0.99095  | 0.028062 |
| DTX1    | 0.987927 | 0.937765 | 1.040771 | 0.647761 |
| TRAFD1  | 1.08026  | 0.988097 | 1.18102  | 0.089737 |
| DMTF1   | 1.027609 | 0.958261 | 1.101977 | 0.44488  |
| CCDC146 | 1.032592 | 0.942244 | 1.131602 | 0.492385 |
| TMEM60  | 1.07678  | 0.98248  | 1.180131 | 0.113654 |
| CD36    | 1.053933 | 1.011426 | 1.098226 | 0.012388 |
| UGT2B28 | 0.759622 | 0.705027 | 0.818445 | 5.02E-13 |
| PNPLA8  | 0.889347 | 0.840009 | 0.941582 | 5.65E-05 |
| RINT1   | 0.990297 | 0.917668 | 1.068674 | 0.801896 |
| SRPK2   | 0.948022 | 0.875101 | 1.027019 | 0.191173 |
| TES     | 0.893451 | 0.850977 | 0.938044 | 5.80E-06 |
| MDFIC   | 0.96228  | 0.910915 | 1.016542 | 0.169516 |
| MTO1    | 1.022627 | 0.944841 | 1.106816 | 0.579367 |
| ANKRD6  | 1.011169 | 0.913652 | 1.119094 | 0.830034 |
| KHDC1   | 1.379786 | 1.254287 | 1.517842 | 3.68E-11 |
| SYNCRIP | 0.978551 | 0.90566  | 1.057308 | 0.58301  |
| SNX14   | 0.981231 | 0.905038 | 1.063839 | 0.645934 |
| NT5E    | 0.867275 | 0.819259 | 0.918104 | 9.57E-07 |
| AKIRIN2 | 0.813854 | 0.744985 | 0.889089 | 4.97E-06 |
| LCA5    | 1.093767 | 1.011308 | 1.18295  | 0.025018 |
| MAP3K7  | 1.062619 | 0.967841 | 1.166677 | 0.202588 |
| CGA     | 1.104014 | 1.002601 | 1.215686 | 0.044136 |
| LMO2    | 1.048273 | 0.969262 | 1.133724 | 0.238354 |
| PHF21A  | 0.864661 | 0.783517 | 0.954209 | 0.003825 |

|           |          |          |          |          |
|-----------|----------|----------|----------|----------|
| NAT10     | 0.986168 | 0.91836  | 1.058983 | 0.701567 |
| PRRG4     | 0.977617 | 0.919136 | 1.039819 | 0.471962 |
| CAPRIN1   | 0.979168 | 0.904591 | 1.059893 | 0.602475 |
| DNAJC14   | 0.973492 | 0.882461 | 1.073913 | 0.591718 |
| CD63      | 0.951939 | 0.872382 | 1.038752 | 0.268671 |
| AVIL      | 1.026137 | 0.942078 | 1.117695 | 0.554071 |
| GDF11     | 1.03322  | 0.966594 | 1.104439 | 0.336593 |
| GLS2      | 1.088602 | 0.911843 | 1.299625 | 0.347683 |
| ITGA7     | 1.089373 | 1.043553 | 1.137205 | 9.45E-05 |
| FAM186B   | 1.09799  | 0.997322 | 1.208819 | 0.05674  |
| RDH5      | 1.208653 | 1.085858 | 1.345335 | 0.000527 |
| AGAP2     | 1.134329 | 1.058382 | 1.215726 | 0.000364 |
| BLOC1S1   | 1.304915 | 1.191456 | 1.429178 | 9.78E-09 |
| CDK4      | 1.059496 | 0.977939 | 1.147856 | 0.157326 |
| PPP1R1A   | 1.030098 | 0.938827 | 1.130243 | 0.531015 |
| TROAP     | 1.188169 | 1.112024 | 1.269527 | 3.36E-07 |
| TSPAN31   | 1.094279 | 0.968162 | 1.236824 | 0.149279 |
| TFCP2     | 1.077584 | 1.003156 | 1.157535 | 0.040733 |
| COQ10A    | 1.078418 | 0.97469  | 1.193184 | 0.14343  |
| PAN2      | 0.991735 | 0.925761 | 1.062411 | 0.813208 |
| ESPL1     | 1.111988 | 1.040912 | 1.187917 | 0.001634 |
| ZC3H10    | 1.002661 | 0.921178 | 1.091352 | 0.950994 |
| HNRNPA1   | 0.839089 | 0.768808 | 0.915796 | 8.47E-05 |
| ACVR1B    | 0.915872 | 0.860653 | 0.974634 | 0.00561  |
| OS9       | 0.940351 | 0.859866 | 1.028368 | 0.177911 |
| KCNH3     | 1.010109 | 0.930367 | 1.096685 | 0.810547 |
| LTV1      | 1.059306 | 0.965868 | 1.161783 | 0.221381 |
| MAP7      | 1.086499 | 1.038382 | 1.136846 | 0.000331 |
| CD164     | 1.107263 | 1.024893 | 1.196253 | 0.009784 |
| AHI1      | 1.036706 | 0.962928 | 1.116137 | 0.338547 |
| HEY2      | 1.173956 | 1.084417 | 1.270889 | 7.43E-05 |
| PKIB      | 1.106749 | 1.039096 | 1.178808 | 0.001624 |
| SMPD2     | 1.12425  | 1.024889 | 1.233243 | 0.013112 |
| MICAL1    | 1.147209 | 1.070809 | 1.229061 | 9.40E-05 |
| REPS1     | 0.90637  | 0.835401 | 0.983368 | 0.018122 |
| STX11     | 0.975189 | 0.915216 | 1.039091 | 0.437844 |
| TEC       | 1.021187 | 0.95997  | 1.086308 | 0.506234 |
| SEMA4F    | 1.537602 | 1.397038 | 1.692309 | 1.42E-18 |
| CCT7      | 1.051604 | 0.970024 | 1.140044 | 0.221984 |
| EGR4      | 0.941219 | 0.834654 | 1.06139  | 0.323083 |
| RAB11FIP5 | 1.198618 | 1.136384 | 1.26426  | 2.74E-11 |
| SMYD5     | 1.040232 | 0.957142 | 1.130534 | 0.353066 |
| DYSF      | 0.980945 | 0.943687 | 1.019674 | 0.330154 |
| CCDC142   | 1.135768 | 1.050178 | 1.228334 | 0.001449 |
| EMX1      | 1.021777 | 0.907645 | 1.15026  | 0.721475 |
| KCNMB4    | 0.892994 | 0.823026 | 0.96891  | 0.006555 |
| USP15     | 0.928626 | 0.861797 | 1.000637 | 0.051987 |
| GNS       | 1.000377 | 0.940257 | 1.06434  | 0.990496 |
| CPM       | 1.070284 | 1.013843 | 1.129867 | 0.013997 |
| MDM2      | 1.120277 | 1.034062 | 1.21368  | 0.00544  |
| KLHL36    | 0.98303  | 0.901457 | 1.071984 | 0.698568 |
| MPHOSP1   | 1.254728 | 1.151601 | 1.367091 | 2.15E-07 |
| KIAA0513  | 1.047782 | 0.994843 | 1.103537 | 0.077647 |
| DYNC1LI2  | 1.01793  | 0.953803 | 1.086369 | 0.592442 |
| FBXL8     | 1.20968  | 1.094041 | 1.33754  | 0.000205 |
| FHOD1     | 1.079683 | 0.993667 | 1.173146 | 0.0703   |
| CCDC102A  | 1.19303  | 1.118739 | 1.272254 | 7.43E-08 |
| SLC9A5    | 1.165806 | 1.0739   | 1.265576 | 0.000251 |

|          |          |          |          |          |
|----------|----------|----------|----------|----------|
| AGT      | 1.046039 | 0.988179 | 1.107286 | 0.121052 |
| KCNK1    | 1.124923 | 1.039122 | 1.217809 | 0.003638 |
| URB2     | 1.115538 | 1.041353 | 1.195007 | 0.001845 |
| EGLN1    | 0.906391 | 0.851534 | 0.964783 | 0.002032 |
| COG2     | 1.197303 | 1.087638 | 1.318024 | 0.000239 |
| ABC10    | 1.051855 | 0.982822 | 1.125738 | 0.144381 |
| TAF5L    | 1.023923 | 0.939903 | 1.115453 | 0.588382 |
| GLUL     | 1.016898 | 0.947946 | 1.090865 | 0.639961 |
| STX6     | 1.015609 | 0.943365 | 1.093386 | 0.680788 |
| RNASEL   | 1.147362 | 1.071864 | 1.228177 | 7.55E-05 |
| DHX9     | 0.984923 | 0.91405  | 1.061292 | 0.690109 |
| KIAA1614 | 1.222889 | 1.112576 | 1.34414  | 3.02E-05 |
| CEP350   | 0.993294 | 0.93217  | 1.058425 | 0.835494 |
| NPL      | 1.075694 | 1.019171 | 1.135352 | 0.008061 |
| PIGC     | 1.255015 | 1.125758 | 1.399113 | 4.20E-05 |
| LAMC1    | 1.054021 | 1.008375 | 1.101733 | 0.019848 |
| RC3H1    | 0.960103 | 0.897289 | 1.027314 | 0.238249 |
| GPR55    | 1.027169 | 0.912499 | 1.156248 | 0.657159 |
| SP110    | 1.041093 | 0.952456 | 1.137979 | 0.375064 |
| MRPL44   | 1.012365 | 0.920974 | 1.112825 | 0.799043 |
| CHRND    | 1.129523 | 1.050632 | 1.214338 | 0.000977 |
| DOCK10   | 1.073579 | 1.017613 | 1.132624 | 0.009346 |
| TTLL4    | 1.168387 | 1.08485  | 1.258358 | 3.93E-05 |
| USP37    | 0.995382 | 0.923271 | 1.073124 | 0.903979 |
| HTR2B    | 0.997298 | 0.944357 | 1.053207 | 0.922551 |
| ITM2C    | 0.911375 | 0.869456 | 0.955314 | 0.000112 |
| SERPINE2 | 1.098413 | 1.033214 | 1.167727 | 0.002643 |
| DNAJB2   | 1.014413 | 0.936394 | 1.098934 | 0.725986 |
| WNT10A   | 1.029568 | 0.908389 | 1.166911 | 0.648329 |
| TMBIM1   | 0.906354 | 0.835505 | 0.983212 | 0.017901 |
| CYP27A1  | 1.131113 | 1.079229 | 1.185491 | 2.71E-07 |
| EIF4E2   | 1.091225 | 0.96953  | 1.228195 | 0.147883 |
| ARMC9    | 1.289042 | 1.168899 | 1.421533 | 3.65E-07 |
| CAB39    | 0.975727 | 0.90131  | 1.056288 | 0.543801 |
| COX5B    | 1.112196 | 1.003846 | 1.232241 | 0.042015 |
| REV1     | 0.985256 | 0.911068 | 1.065486 | 0.709984 |
| TSGA10   | 0.929572 | 0.852343 | 1.013799 | 0.098885 |
| MFSD9    | 1.091248 | 0.996893 | 1.194534 | 0.05842  |
| TMEM127  | 0.951173 | 0.880148 | 1.027929 | 0.206131 |
| EDAR     | 0.994327 | 0.904254 | 1.093371 | 0.906514 |
| TGFBRAP1 | 0.844363 | 0.79277  | 0.899314 | 1.45E-07 |
| GCC2     | 0.987173 | 0.913196 | 1.067143 | 0.745309 |
| MRPS9    | 1.148175 | 1.02743  | 1.283111 | 0.014798 |
| ANKRD36  | 1.016648 | 0.959089 | 1.077661 | 0.578726 |
| EPC2     | 0.96875  | 0.900003 | 1.042748 | 0.397902 |
| ARHGEF4  | 0.931414 | 0.795938 | 1.089948 | 0.375631 |
| ISCU     | 1.017451 | 0.918055 | 1.127607 | 0.741515 |
| ALDH1L2  | 1.31737  | 1.181883 | 1.468388 | 6.43E-07 |
| STAB2    | 0.859467 | 0.716818 | 1.030504 | 0.101951 |
| USP44    | 0.957503 | 0.890315 | 1.02976  | 0.242035 |
| SCYL2    | 0.979842 | 0.90316  | 1.063035 | 0.624301 |
| CKAP4    | 1.017771 | 0.975707 | 1.061647 | 0.413378 |
| PLXNC1   | 1.166997 | 1.116307 | 1.219989 | 9.36E-12 |
| APPL2    | 1.004059 | 0.937855 | 1.074937 | 0.907332 |
| PWP1     | 1.03488  | 0.938142 | 1.141592 | 0.493519 |
| DRAM1    | 0.886011 | 0.831384 | 0.944228 | 0.000193 |
| SLC41A2  | 1.268822 | 1.153097 | 1.396161 | 1.06E-06 |
| VILL     | 1.095033 | 1.00911  | 1.188272 | 0.029446 |



|          |          |          |          |          |
|----------|----------|----------|----------|----------|
| FLNB     | 0.974974 | 0.93074  | 1.021311 | 0.284692 |
| NEK3     | 1.034285 | 0.957501 | 1.117227 | 0.391708 |
| VPS36    | 0.986627 | 0.912621 | 1.066634 | 0.735047 |
| RNASEH2E | 1.008708 | 0.930877 | 1.093046 | 0.832399 |
| CKAP2    | 1.053825 | 0.970573 | 1.144218 | 0.211812 |
| TBC1D4   | 1.126103 | 1.063782 | 1.192076 | 4.34E-05 |
| THSD1    | 1.070937 | 0.991596 | 1.156628 | 0.080974 |
| LRCH1    | 0.91903  | 0.86156  | 0.980334 | 0.010382 |
| SUCLA2   | 1.098021 | 0.998715 | 1.207201 | 0.05319  |
| RCBTB1   | 0.919627 | 0.859068 | 0.984456 | 0.015921 |
| MED4     | 1.039598 | 0.945155 | 1.143477 | 0.42419  |
| PHF11    | 0.936282 | 0.852987 | 1.027711 | 0.166062 |
| COG3     | 0.971236 | 0.887163 | 1.063277 | 0.527527 |
| LMO7     | 1.27164  | 1.149572 | 1.40667  | 3.05E-06 |
| ITM2B    | 0.780437 | 0.712591 | 0.854742 | 9.17E-08 |
| SPRY2    | 0.965604 | 0.925811 | 1.007107 | 0.103075 |
| NUDT15   | 1.009256 | 0.925373 | 1.100743 | 0.83514  |
| EDNRB    | 1.161444 | 1.01762  | 1.325596 | 0.026492 |
| RCBTB2   | 1.021643 | 0.955909 | 1.091896 | 0.528019 |
| LCP1     | 1.043786 | 0.973778 | 1.118827 | 0.226351 |
| SETDB2   | 1.028695 | 0.959434 | 1.102956 | 0.426313 |
| SCRN1    | 1.050271 | 1.010835 | 1.091246 | 0.01201  |
| TNS3     | 1.103298 | 1.052361 | 1.1567   | 4.58E-05 |
| SPDYE1   | 1.019272 | 0.933669 | 1.112724 | 0.669747 |
| CHST12   | 1.147131 | 1.087615 | 1.209903 | 4.42E-07 |
| IGF2BP3  | 1.002761 | 0.959046 | 1.048468 | 0.903509 |
| GPNMB    | 1.125594 | 1.04491  | 1.212508 | 0.001824 |
| RAPGEF5  | 1.146492 | 1.055123 | 1.245772 | 0.001254 |
| RAC1     | 0.893448 | 0.808837 | 0.986911 | 0.026451 |
| KDELR2   | 0.983526 | 0.89061  | 1.086135 | 0.742847 |
| IL6      | 1.11504  | 1.052102 | 1.181743 | 0.000239 |
| ZDHHC4   | 0.992188 | 0.882469 | 1.115548 | 0.895644 |
| AOAH     | 0.975322 | 0.929065 | 1.023883 | 0.313496 |
| BZW2     | 0.899582 | 0.828753 | 0.976464 | 0.011432 |
| TBRG4    | 1.014449 | 0.935054 | 1.100585 | 0.730094 |
| DDX56    | 1.088401 | 0.994584 | 1.191067 | 0.065493 |
| HUS1     | 1.03187  | 0.939662 | 1.133126 | 0.511254 |
| NACAD    | 0.756169 | 0.670332 | 0.852997 | 5.46E-06 |
| DBNL     | 1.088217 | 1.000652 | 1.183444 | 0.048246 |
| CCM2     | 0.924044 | 0.852422 | 1.001684 | 0.054973 |
| MYO1G    | 1.002077 | 0.935466 | 1.073433 | 0.952847 |
| TTYH3    | 1.034395 | 0.964222 | 1.109676 | 0.345437 |
| TTC5     | 1.157333 | 1.066039 | 1.256445 | 0.000491 |
| ZFHX2    | 1.174096 | 1.049642 | 1.313306 | 0.004994 |
| MTHFS    | 1.18524  | 1.053444 | 1.333525 | 0.004719 |
| ADAMTS7  | 0.926258 | 0.855153 | 1.003276 | 0.060146 |
| IREB2    | 0.981172 | 0.911998 | 1.055593 | 0.610362 |
| ALPK3    | 0.993619 | 0.941639 | 1.048468 | 0.815377 |
| TM6SF1   | 0.940189 | 0.884308 | 0.999603 | 0.048533 |
| CIB2     | 1.11853  | 1.028333 | 1.216638 | 0.009021 |
| CALCOCO  | 0.898012 | 0.832596 | 0.968567 | 0.00531  |
| RSAD1    | 1.113632 | 1.030028 | 1.204021 | 0.006872 |
| NMT1     | 1.037661 | 0.946435 | 1.137681 | 0.431044 |
| MYCBPAP  | 1.102163 | 1.018066 | 1.193206 | 0.016301 |
| VEZF1    | 0.998424 | 0.915548 | 1.088802 | 0.971544 |
| CHAD     | 1.094963 | 0.992814 | 1.207621 | 0.069427 |
| TACO1    | 1.175503 | 1.055838 | 1.308731 | 0.003158 |
| TEX2     | 1.022275 | 0.949493 | 1.100636 | 0.558804 |

|           |          |          |          |          |
|-----------|----------|----------|----------|----------|
| DCAF7     | 1.083592 | 1.014016 | 1.157941 | 0.017738 |
| LIMD2     | 0.872777 | 0.802877 | 0.948762 | 0.001399 |
| BRIP1     | 1.072415 | 0.998657 | 1.151621 | 0.054479 |
| RTP4      | 1.097413 | 1.018454 | 1.182492 | 0.014689 |
| ACTL6A    | 1.196208 | 1.100988 | 1.299664 | 2.30E-05 |
| NDUFB5    | 1.082295 | 0.983266 | 1.191297 | 0.106249 |
| MRPL47    | 0.907696 | 0.817385 | 1.007984 | 0.070105 |
| ERMN      | 0.916235 | 0.866562 | 0.968755 | 0.002097 |
| GALNT5    | 1.139548 | 1.000038 | 1.298521 | 0.049934 |
| TANK      | 0.979122 | 0.905974 | 1.058176 | 0.594315 |
| BLK       | 1.019234 | 0.96076  | 1.081267 | 0.527391 |
| SKIL      | 0.998473 | 0.950281 | 1.04911  | 0.951725 |
| HLX       | 1.077856 | 1.009144 | 1.151247 | 0.025695 |
| VPS45     | 1.145797 | 1.063537 | 1.234418 | 0.000343 |
| IL10      | 1.016899 | 0.925258 | 1.117616 | 0.728007 |
| KCTD3     | 0.943955 | 0.883487 | 1.008562 | 0.087718 |
| RPS6KC1   | 1.015304 | 0.949382 | 1.085803 | 0.657457 |
| CBWD2     | 1.108621 | 1.010017 | 1.216852 | 0.030031 |
| IL1RN     | 1.082481 | 1.039325 | 1.12743  | 0.000134 |
| SMPD4     | 0.973028 | 0.892896 | 1.060351 | 0.532915 |
| WDR33     | 1.026847 | 0.948866 | 1.111237 | 0.510893 |
| CCDC115   | 1.222237 | 1.091615 | 1.368489 | 0.000501 |
| SAP130    | 0.975841 | 0.889552 | 1.0705   | 0.604652 |
| BIN1      | 0.945663 | 0.893171 | 1.001239 | 0.055179 |
| IMP4      | 1.147534 | 1.026204 | 1.283208 | 0.015794 |
| HS6ST1    | 1.011005 | 0.952241 | 1.073396 | 0.720172 |
| GYPC      | 0.894291 | 0.855069 | 0.935312 | 1.05E-06 |
| STAM      | 0.915012 | 0.861017 | 0.972392 | 0.004208 |
| ABI1      | 0.896912 | 0.826754 | 0.973023 | 0.008844 |
| YME1L1    | 0.939296 | 0.870296 | 1.013766 | 0.107673 |
| DNAJC1    | 1.014181 | 0.944634 | 1.088848 | 0.69764  |
| NIPSNAP3  | 1.027795 | 0.942232 | 1.121128 | 0.53644  |
| LRR8A     | 0.871959 | 0.813921 | 0.934136 | 9.67E-05 |
| CDK9      | 1.106574 | 1.0163   | 1.204867 | 0.019683 |
| TXN       | 0.995455 | 0.917824 | 1.079653 | 0.912448 |
| ODF2      | 1.120349 | 1.026448 | 1.222841 | 0.010945 |
| TOR1B     | 1.127657 | 1.050642 | 1.210318 | 0.000873 |
| SMC2      | 1.125599 | 1.052577 | 1.203686 | 0.000546 |
| KLF4      | 1.026674 | 0.991986 | 1.062575 | 0.133323 |
| TOR1A     | 1.194208 | 1.080145 | 1.320316 | 0.00053  |
| RALGPS1   | 1.258738 | 1.14428  | 1.384645 | 2.24E-06 |
| ST6GALNA7 | 1.126665 | 1.051848 | 1.206804 | 0.000669 |
| TMOD1     | 1.015708 | 0.970381 | 1.063153 | 0.503407 |
| DAB2IP    | 1.139691 | 1.031569 | 1.259147 | 0.010137 |
| STXBP1    | 1.209382 | 1.117264 | 1.309095 | 2.56E-06 |
| SLC2A8    | 1.123395 | 1.044743 | 1.20797  | 0.001679 |
| ANGPTL2   | 1.241281 | 1.104557 | 1.394929 | 0.000283 |
| CDK5RAP2  | 1.000065 | 0.928114 | 1.077595 | 0.998635 |
| SLC31A2   | 0.984623 | 0.926826 | 1.046024 | 0.615606 |
| SLC31A1   | 1.03505  | 0.954982 | 1.121832 | 0.401676 |
| TLR4      | 1.052414 | 1.000061 | 1.107507 | 0.049727 |
| ZNF189    | 0.995608 | 0.935687 | 1.059366 | 0.889458 |
| STX17     | 1.106642 | 1.02496  | 1.194834 | 0.009593 |
| PRPF4     | 1.050054 | 0.950699 | 1.159793 | 0.335517 |
| FPGS      | 1.014895 | 0.929558 | 1.108065 | 0.741455 |
| USP20     | 1.094835 | 1.026051 | 1.168229 | 0.006204 |
| ATP6V1G1  | 0.958668 | 0.865442 | 1.061937 | 0.418709 |
| TEX10     | 0.935936 | 0.867326 | 1.009974 | 0.088293 |

|          |          |          |          |          |
|----------|----------|----------|----------|----------|
| GARNL3   | 1.379882 | 1.217538 | 1.563872 | 4.60E-07 |
| MRPL50   | 1.106081 | 1.002841 | 1.21995  | 0.043726 |
| DPM2     | 1.158706 | 1.071646 | 1.252837 | 0.000219 |
| WDR38    | 1.056806 | 0.981532 | 1.137853 | 0.142777 |
| TSTD2    | 1.005911 | 0.927696 | 1.09072  | 0.886523 |
| HEMGN    | 1.006848 | 0.9747   | 1.040056 | 0.680184 |
| PSMB7    | 0.88278  | 0.79649  | 0.978418 | 0.017515 |
| NR5A1    | 0.891342 | 0.810205 | 0.980605 | 0.018168 |
| RABEPK   | 1.056948 | 0.960218 | 1.163422 | 0.258056 |
| GOLGA1   | 1.048761 | 0.970713 | 1.133084 | 0.227574 |
| XPA      | 0.9665   | 0.889013 | 1.050741 | 0.424215 |
| NCBP1    | 1.018365 | 0.949253 | 1.092509 | 0.611781 |
| ANP32B   | 0.945379 | 0.857267 | 1.042548 | 0.260491 |
| PDCL     | 1.095849 | 1.003814 | 1.196323 | 0.040853 |
| RPL35    | 0.952184 | 0.879814 | 1.030507 | 0.224419 |
| LMX1B    | 0.94807  | 0.836526 | 1.074489 | 0.403719 |
| ARPC5L   | 1.075575 | 0.988929 | 1.169812 | 0.089098 |
| ENPP2    | 1.10921  | 1.044627 | 1.177786 | 0.000708 |
| DSCC1    | 1.189481 | 1.095138 | 1.29195  | 3.86E-05 |
| DERL1    | 0.984359 | 0.903763 | 1.072143 | 0.717577 |
| MYC      | 0.940364 | 0.881057 | 1.003664 | 0.064324 |
| RANBP6   | 0.969691 | 0.908627 | 1.034858 | 0.353686 |
| POLR1E   | 0.980057 | 0.885027 | 1.085291 | 0.698674 |
| PLAA     | 0.917416 | 0.844036 | 0.997176 | 0.042717 |
| IL11RA   | 1.085467 | 1.011425 | 1.16493  | 0.0229   |
| UBAP2    | 0.950423 | 0.864804 | 1.044519 | 0.29112  |
| APTX     | 1.136663 | 1.007632 | 1.282218 | 0.037194 |
| RNF38    | 0.88133  | 0.812029 | 0.956547 | 0.002501 |
| TLN1     | 1.035887 | 0.963486 | 1.113729 | 0.340205 |
| SIT1     | 1.013433 | 0.946571 | 1.085018 | 0.701585 |
| DNAJB5   | 1.045916 | 0.978846 | 1.117582 | 0.184292 |
| SPAG8    | 1.293812 | 1.166594 | 1.434903 | 1.07E-06 |
| DCTN3    | 1.211102 | 1.070323 | 1.370399 | 0.002382 |
| CD72     | 0.998691 | 0.936282 | 1.065261 | 0.968271 |
| TMEM8B   | 1.438899 | 1.292594 | 1.601764 | 2.91E-11 |
| GRHPR    | 0.888925 | 0.806455 | 0.979827 | 0.017779 |
| ALDH1B1  | 1.124082 | 1.063011 | 1.188662 | 4.06E-05 |
| DENND4C  | 0.883919 | 0.832873 | 0.938095 | 4.79E-05 |
| RPS6     | 0.821135 | 0.75754  | 0.890069 | 1.66E-06 |
| CNPY3    | 1.021532 | 0.936358 | 1.114453 | 0.631517 |
| FOXP4    | 1.043669 | 0.977266 | 1.114585 | 0.20254  |
| PPIL1    | 1.180342 | 1.10095  | 1.265458 | 3.06E-06 |
| KLC4     | 0.99386  | 0.909208 | 1.086394 | 0.892138 |
| KIF13A   | 0.919944 | 0.869505 | 0.97331  | 0.003728 |
| PIM1     | 1.142982 | 1.081769 | 1.207658 | 1.95E-06 |
| GMPR     | 0.980635 | 0.935289 | 1.02818  | 0.418225 |
| YIPF3    | 1.105142 | 0.981602 | 1.244231 | 0.098342 |
| TMEM14B  | 1.233007 | 1.104515 | 1.376446 | 0.000191 |
| TMEM63B  | 1.021615 | 0.95826  | 1.089159 | 0.512665 |
| FRS3     | 1.168907 | 1.059377 | 1.289762 | 0.001877 |
| TJAP1    | 1.057918 | 0.940528 | 1.189959 | 0.348129 |
| CAPN11   | 0.912091 | 0.849759 | 0.978997 | 0.010844 |
| IRF4     | 1.023631 | 0.977307 | 1.072152 | 0.322918 |
| SLC22A23 | 1.116744 | 1.059302 | 1.177301 | 4.16E-05 |
| TUBB2A   | 1.001692 | 0.953707 | 1.052091 | 0.946187 |
| LRRC1    | 1.16886  | 1.062618 | 1.285725 | 0.001331 |
| GCM1     | 1.043035 | 0.944667 | 1.151646 | 0.40446  |
| BPHL     | 1.283465 | 1.141163 | 1.443512 | 3.15E-05 |

|           |          |          |          |          |
|-----------|----------|----------|----------|----------|
| RIPK1     | 1.037272 | 0.953322 | 1.128614 | 0.395422 |
| TUBB2B    | 0.959837 | 0.85055  | 1.083167 | 0.506282 |
| HMG1A1    | 0.865308 | 0.810028 | 0.92436  | 1.75E-05 |
| TCF19     | 1.127212 | 1.058185 | 1.200741 | 0.000204 |
| FLOT1     | 1.041061 | 0.970515 | 1.116733 | 0.261012 |
| IER3      | 1.006415 | 0.964863 | 1.049757 | 0.766276 |
| MDC1      | 1.107399 | 0.995335 | 1.23208  | 0.060921 |
| PGBD1     | 1.104067 | 1.0205   | 1.194476 | 0.013691 |
| TPMT      | 1.126018 | 1.015756 | 1.248248 | 0.02399  |
| RNF144B   | 1.033988 | 0.98604  | 1.084269 | 0.167692 |
| NRM       | 1.035631 | 0.943639 | 1.136592 | 0.460713 |
| MTCH1     | 1.007784 | 0.929984 | 1.092093 | 0.849965 |
| VARS2     | 1.431998 | 1.149152 | 1.784463 | 0.001383 |
| TAF8      | 1.097185 | 1.013098 | 1.18825  | 0.022617 |
| FAM8A1    | 0.94515  | 0.883288 | 1.011343 | 0.102391 |
| FGFBP2    | 1.010483 | 0.952335 | 1.072182 | 0.73018  |
| CPEB2     | 1.166462 | 1.110837 | 1.224872 | 6.56E-10 |
| FHDC1     | 1.046183 | 1.002488 | 1.091781 | 0.038066 |
| TLR2      | 0.962459 | 0.916602 | 1.01061  | 0.124477 |
| MYO7A     | 1.179607 | 1.093849 | 1.272089 | 1.79E-05 |
| FCHSD2    | 1.0017   | 0.930343 | 1.078531 | 0.964059 |
| ARRB1     | 1.017549 | 0.954404 | 1.084872 | 0.594573 |
| SLCO2B1   | 1.060103 | 0.904963 | 1.241839 | 0.469689 |
| ANKRD42   | 0.990241 | 0.902665 | 1.086313 | 0.835552 |
| IL18BP    | 1.13036  | 1.024367 | 1.247321 | 0.01472  |
| NUMA1     | 0.911393 | 0.846852 | 0.980852 | 0.013291 |
| CCDC90B   | 1.065042 | 0.948301 | 1.196154 | 0.287419 |
| SYTL2     | 0.912162 | 0.846857 | 0.982503 | 0.01528  |
| RAB30     | 1.026644 | 0.965251 | 1.091941 | 0.403263 |
| CREBZF    | 0.995559 | 0.930979 | 1.064618 | 0.896506 |
| LRR32     | 1.122237 | 1.049741 | 1.19974  | 0.000713 |
| PRCP      | 1.045771 | 0.955092 | 1.145059 | 0.333498 |
| NARS2     | 0.983642 | 0.918729 | 1.053142 | 0.635867 |
| RNF121    | 1.087972 | 1.005335 | 1.177402 | 0.036441 |
| MRPL15    | 0.97866  | 0.902423 | 1.061338 | 0.602162 |
| PI15      | 1.243434 | 1.140089 | 1.356146 | 8.59E-07 |
| GGH       | 1.276634 | 1.157949 | 1.407484 | 9.31E-07 |
| SLCO5A1   | 0.825557 | 0.782545 | 0.870935 | 2.19E-12 |
| TGS1      | 1.013996 | 0.929303 | 1.106408 | 0.754781 |
| SDCBP     | 0.928335 | 0.857429 | 1.005104 | 0.066599 |
| NEK1      | 1.07999  | 0.994571 | 1.172745 | 0.067178 |
| DDX60     | 1.083443 | 1.023948 | 1.146396 | 0.005415 |
| SORL1     | 0.936078 | 0.893615 | 0.980559 | 0.00529  |
| BUD13     | 0.896466 | 0.819133 | 0.9811   | 0.017572 |
| TRPC6     | 1.146054 | 1.087559 | 1.207696 | 3.39E-07 |
| MMP7      | 1.269168 | 1.180904 | 1.36403  | 9.10E-11 |
| DCUN1D5   | 1.200693 | 1.076277 | 1.339491 | 0.001049 |
| SLC37A4   | 1.132058 | 1.0338   | 1.239655 | 0.007417 |
| RDX       | 1.089085 | 1.005458 | 1.179668 | 0.036306 |
| PPP2R1B   | 1.149699 | 1.066279 | 1.239646 | 0.000284 |
| FDX1      | 0.940353 | 0.852077 | 1.037774 | 0.221418 |
| FXD6      | 1.187611 | 1.081625 | 1.303982 | 0.000312 |
| TMPPRSS13 | 1.203732 | 1.091838 | 1.327094 | 0.000195 |
| CASP1     | 1.061066 | 0.99795  | 1.128175 | 0.058176 |
| CASP5     | 0.98906  | 0.86898  | 1.125735 | 0.867713 |
| ALKBH8    | 1.157658 | 1.065127 | 1.258227 | 0.000572 |
| MAP2K5    | 0.951932 | 0.868984 | 1.042798 | 0.289585 |
| CTDSPL2   | 0.941958 | 0.875492 | 1.01347  | 0.109246 |

|          |          |          |          |          |
|----------|----------|----------|----------|----------|
| SLTM     | 0.907014 | 0.82505  | 0.99712  | 0.04342  |
| THBS1    | 1.041809 | 1.01179  | 1.072719 | 0.006039 |
| MAPKBP1  | 1.05225  | 0.980608 | 1.129126 | 0.15688  |
| NUSAP1   | 1.218903 | 1.078848 | 1.37714  | 0.00148  |
| NDUFAF1  | 1.195935 | 1.084941 | 1.318284 | 0.000318 |
| KIF23    | 1.103649 | 1.030985 | 1.181434 | 0.004538 |
| ITGA11   | 0.776906 | 0.642808 | 0.938979 | 0.009021 |
| RTF1     | 0.942032 | 0.858662 | 1.033496 | 0.206559 |
| PARP6    | 0.947348 | 0.863731 | 1.039059 | 0.251273 |
| RPLP1    | 0.902741 | 0.844443 | 0.965063 | 0.002664 |
| PAQR5    | 0.974577 | 0.880196 | 1.079077 | 0.620232 |
| TUBGCP4  | 1.129947 | 1.028173 | 1.241795 | 0.011184 |
| ITPKA    | 0.946552 | 0.888834 | 1.008019 | 0.087051 |
| UACA     | 1.329882 | 1.19874  | 1.475371 | 7.36E-08 |
| SMAD6    | 1.171094 | 1.087562 | 1.261042 | 2.87E-05 |
| PLCB2    | 1.07021  | 1.007662 | 1.13664  | 0.027219 |
| TMEM62   | 0.999645 | 0.915702 | 1.091283 | 0.993669 |
| PAK6     | 0.929893 | 0.854728 | 1.011669 | 0.09099  |
| ADAM10   | 1.014386 | 0.946028 | 1.087683 | 0.688225 |
| DUOX1    | 1.043466 | 0.961454 | 1.132473 | 0.308319 |
| ZNF280D  | 0.946997 | 0.863124 | 1.03902  | 0.249744 |
| BCL2L10  | 1.0737   | 1.012561 | 1.138531 | 0.017442 |
| RSL24D1  | 0.871404 | 0.799409 | 0.949884 | 0.001757 |
| SPTBN5   | 1.122773 | 1.016875 | 1.2397   | 0.021961 |
| GCHFR    | 1.169603 | 1.049268 | 1.303739 | 0.004682 |
| BCAR3    | 0.967976 | 0.903535 | 1.037014 | 0.354467 |
| TTLL7    | 1.212018 | 1.10108  | 1.334134 | 8.64E-05 |
| FNBP1L   | 0.957834 | 0.912352 | 1.005582 | 0.082617 |
| GTF2B    | 0.93829  | 0.854906 | 1.029807 | 0.179787 |
| RABGGTB  | 0.946574 | 0.87869  | 1.019701 | 0.148144 |
| IFI44L   | 1.053208 | 1.012411 | 1.095648 | 0.010114 |
| IFI44    | 1.009701 | 0.963712 | 1.057883 | 0.684824 |
| SLC44A5  | 0.971635 | 0.891881 | 1.05852  | 0.510215 |
| DBT      | 1.051749 | 0.962317 | 1.149492 | 0.265797 |
| IFT172   | 1.02417  | 0.942889 | 1.112459 | 0.571338 |
| CGREF1   | 1.389091 | 1.276738 | 1.511331 | 2.22E-14 |
| HADHB    | 1.024982 | 0.928018 | 1.132076 | 0.626512 |
| KHK      | 1.43249  | 1.327945 | 1.545266 | 1.46E-20 |
| ADCY3    | 1.028675 | 0.961762 | 1.100244 | 0.410027 |
| PPM1B    | 0.969073 | 0.899106 | 1.044485 | 0.411286 |
| PNPT1    | 1.14132  | 1.054972 | 1.234735 | 0.000991 |
| DYNC2LI1 | 1.041356 | 0.938587 | 1.155378 | 0.444621 |
| THUMPD2  | 1.059157 | 0.977756 | 1.147335 | 0.158945 |
| CYP1B1   | 1.123256 | 1.060863 | 1.189318 | 6.71E-05 |
| RAB1A    | 0.931655 | 0.85954  | 1.009821 | 0.085031 |
| ACTR2    | 1.07069  | 0.9951   | 1.152022 | 0.067478 |
| PREB     | 1.144226 | 1.070635 | 1.222875 | 7.12E-05 |
| SLC5A6   | 1.082118 | 1.009769 | 1.159651 | 0.025396 |
| PREPL    | 1.108388 | 1.032293 | 1.190092 | 0.004571 |
| SLC3A1   | 1.181    | 1.030237 | 1.353826 | 0.016965 |
| EMILIN1  | 1.012294 | 0.975026 | 1.050986 | 0.523173 |
| FBXO11   | 0.947468 | 0.880038 | 1.020065 | 0.151985 |
| SIX3     | 0.749627 | 0.674896 | 0.832634 | 7.52E-08 |
| CENPO    | 1.094183 | 1.004163 | 1.192272 | 0.039897 |
| LRPPRC   | 0.985613 | 0.918614 | 1.057499 | 0.686613 |
| DTNB     | 1.161502 | 1.052607 | 1.281663 | 0.002876 |
| ACTR1A   | 1.049015 | 0.949104 | 1.159443 | 0.348738 |
| CYP2C8   | 1.148919 | 1.037302 | 1.272546 | 0.00776  |

|           |          |          |          |          |
|-----------|----------|----------|----------|----------|
| MYOF      | 1.106984 | 1.062087 | 1.15378  | 1.50E-06 |
| LOXL4     | 0.946019 | 0.895349 | 0.999558 | 0.048188 |
| STAMBPL1  | 1.013894 | 0.935934 | 1.098348 | 0.735348 |
| CH25H     | 1.035385 | 0.952708 | 1.125237 | 0.412802 |
| ATAD1     | 1.001983 | 0.928434 | 1.081359 | 0.959376 |
| KIF11     | 1.110217 | 1.04116  | 1.183855 | 0.001418 |
| DUSP5     | 0.942091 | 0.896574 | 0.989919 | 0.018226 |
| CALHM2    | 1.077777 | 1.013156 | 1.146519 | 0.017584 |
| ARL3      | 1.216404 | 1.11465  | 1.327446 | 1.11E-05 |
| CEP55     | 1.157304 | 1.082669 | 1.237084 | 1.75E-05 |
| KIF20B    | 1.007236 | 0.937682 | 1.08195  | 0.843435 |
| ENTPD1    | 0.996027 | 0.936398 | 1.059452 | 0.89942  |
| EXOC6     | 1.063689 | 0.981649 | 1.152585 | 0.131631 |
| PLCE1     | 1.208225 | 1.084188 | 1.346453 | 0.00062  |
| DBR1      | 1.106051 | 1.009889 | 1.211369 | 0.029855 |
| DNAJC13   | 1.008609 | 0.951312 | 1.069358 | 0.773896 |
| GPR87     | 1.156819 | 1.078281 | 1.241077 | 4.89E-05 |
| ANXA7     | 1.034941 | 0.936418 | 1.14383  | 0.501021 |
| FAM149B1  | 1.015328 | 0.925932 | 1.113355 | 0.746328 |
| ASCC1     | 1.10907  | 1.001649 | 1.22801  | 0.046408 |
| ADAMTS1   | 1.056607 | 0.998978 | 1.11756  | 0.054326 |
| RPS24     | 0.890441 | 0.832802 | 0.952069 | 0.000678 |
| TET1      | 1.020956 | 0.952271 | 1.094595 | 0.559448 |
| DNA2      | 1.102905 | 1.025846 | 1.185752 | 0.008038 |
| AOX1      | 0.87217  | 0.787358 | 0.966119 | 0.008784 |
| ATIC      | 1.06502  | 0.986138 | 1.150213 | 0.108619 |
| SMARCAL1  | 1.023619 | 0.956984 | 1.094895 | 0.496676 |
| BARD1     | 1.066145 | 0.997446 | 1.139575 | 0.05947  |
| STAT4     | 1.040491 | 0.987357 | 1.096484 | 0.137757 |
| ASNSD1    | 1.056541 | 0.959804 | 1.163029 | 0.261612 |
| METTL5    | 1.199034 | 1.074263 | 1.338296 | 0.001205 |
| SSB       | 1.098885 | 0.99368  | 1.215229 | 0.066286 |
| NAB1      | 0.975491 | 0.896185 | 1.061815 | 0.566259 |
| PPIG      | 0.928216 | 0.839039 | 1.026871 | 0.148335 |
| FASTKD1   | 1.0632   | 0.987478 | 1.14473  | 0.104017 |
| IDH1      | 1.092062 | 1.028349 | 1.159723 | 0.004087 |
| OLA1      | 0.968031 | 0.873593 | 1.072679 | 0.535015 |
| CIR1      | 0.936786 | 0.856223 | 1.024929 | 0.154657 |
| FAM117B   | 1.031816 | 0.956491 | 1.113072 | 0.418053 |
| WDR12     | 1.100014 | 1.020393 | 1.185849 | 0.012898 |
| ABI2      | 1.074353 | 0.997231 | 1.15744  | 0.059159 |
| ITGAV     | 0.960278 | 0.916034 | 1.00666  | 0.092151 |
| SLC40A1   | 1.105156 | 1.065894 | 1.145864 | 6.04E-08 |
| SLC35A5   | 1.036676 | 0.966606 | 1.111824 | 0.313093 |
| SENP7     | 1.000758 | 0.929523 | 1.077452 | 0.983954 |
| COX17     | 0.995038 | 0.880482 | 1.1245   | 0.936472 |
| PARP9     | 1.062292 | 0.991629 | 1.13799  | 0.085321 |
| MNS1      | 1.097575 | 0.992588 | 1.213666 | 0.069534 |
| USP8      | 0.978848 | 0.896071 | 1.069273 | 0.635342 |
| SECISBP2L | 0.94437  | 0.888927 | 1.00327  | 0.063711 |
| TMOD3     | 0.944336 | 0.871566 | 1.023181 | 0.161558 |
| SPPL2A    | 1.026349 | 0.940983 | 1.119459 | 0.557201 |
| GLCE      | 1.211028 | 1.116649 | 1.313383 | 3.74E-06 |
| SHF       | 0.916873 | 0.850461 | 0.988471 | 0.023684 |
| APH1B     | 1.019473 | 0.938057 | 1.107956 | 0.649713 |
| PARP16    | 0.964258 | 0.871779 | 1.066547 | 0.479232 |
| PPCDC     | 1.196333 | 1.114422 | 1.284264 | 7.28E-07 |
| SEMA7A    | 1.016198 | 0.965722 | 1.069313 | 0.536474 |

|          |          |          |          |          |
|----------|----------|----------|----------|----------|
| UBL7     | 1.068048 | 0.967121 | 1.179507 | 0.193651 |
| ARHGAP24 | 1.004955 | 0.942153 | 1.071944 | 0.880668 |
| FAM13A   | 1.001898 | 0.929754 | 1.07964  | 0.960333 |
| HERC3    | 0.973214 | 0.895959 | 1.057131 | 0.519968 |
| HERC6    | 1.067275 | 0.991073 | 1.149336 | 0.08494  |
| HERC5    | 1.07139  | 1.015654 | 1.130184 | 0.011412 |
| PCDH10   | 1.104729 | 1.040376 | 1.173062 | 0.001144 |
| COPS4    | 0.938984 | 0.84267  | 1.046305 | 0.254208 |
| HNRNPD   | 0.890921 | 0.803958 | 0.987291 | 0.027521 |
| PRKG2    | 1.218872 | 1.121883 | 1.324245 | 2.89E-06 |
| RASGEF1B | 0.984724 | 0.928324 | 1.044551 | 0.608975 |
| SEC31A   | 0.911612 | 0.837744 | 0.991993 | 0.031839 |
| BBS7     | 1.223234 | 1.112492 | 1.344999 | 3.16E-05 |
| KIAA1109 | 0.993039 | 0.935751 | 1.053834 | 0.817769 |
| BMPR1B   | 1.138608 | 1.034652 | 1.253009 | 0.007876 |
| RAP1GDS1 | 1.093761 | 1.007836 | 1.187012 | 0.031797 |
| LARP1B   | 1.020309 | 0.921684 | 1.129488 | 0.698289 |
| MMRN1    | 1.146377 | 1.109786 | 1.184175 | 1.54E-16 |
| PDE5A    | 1.10275  | 1.029713 | 1.180968 | 0.005151 |
| PRDM5    | 1.275575 | 1.156035 | 1.407477 | 1.25E-06 |
| NAAA     | 1.032204 | 0.970431 | 1.097909 | 0.314087 |
| NUP54    | 0.924626 | 0.857234 | 0.997316 | 0.042401 |
| CXCL9    | 1.014131 | 0.922788 | 1.114516 | 0.770762 |
| BMP2K    | 1.015249 | 0.951201 | 1.083609 | 0.648975 |
| G3BP2    | 0.981389 | 0.893876 | 1.07747  | 0.69342  |
| FRAS1    | 1.16676  | 1.099746 | 1.237859 | 3.22E-07 |
| SCARB2   | 0.9069   | 0.837615 | 0.981916 | 0.015951 |
| CCNG2    | 0.987885 | 0.913094 | 1.068803 | 0.761551 |
| CNOT6L   | 1.009752 | 0.945227 | 1.078681 | 0.773322 |
| USO1     | 0.969425 | 0.900276 | 1.043885 | 0.410831 |
| ANXA3    | 1.040758 | 1.003747 | 1.079133 | 0.030585 |
| PPA2     | 1.062516 | 0.95372  | 1.183725 | 0.271235 |
| CENPE    | 1.133872 | 1.055671 | 1.217865 | 0.000569 |
| GSTCD    | 1.136455 | 1.037976 | 1.244277 | 0.005676 |
| INTS12   | 0.956863 | 0.852291 | 1.074265 | 0.455201 |
| CASP6    | 0.992835 | 0.929081 | 1.060965 | 0.831838 |
| LEF1     | 1.010561 | 0.966405 | 1.056734 | 0.644898 |
| HADH     | 1.124929 | 1.020248 | 1.240352 | 0.018167 |
| EGF      | 1.237257 | 1.141107 | 1.341507 | 2.50E-07 |
| PAPSS1   | 0.952892 | 0.883263 | 1.02801  | 0.212614 |
| SEC24B   | 0.903612 | 0.839371 | 0.972769 | 0.007066 |
| PPP3CA   | 0.93881  | 0.871559 | 1.011251 | 0.095922 |
| SLC39A8  | 0.981267 | 0.91593  | 1.051266 | 0.59065  |
| FBN2     | 0.943982 | 0.898575 | 0.991683 | 0.021906 |
| MAPK8IP3 | 0.911031 | 0.85543  | 0.970246 | 0.003731 |
| RGS3     | 1.058152 | 0.996966 | 1.123093 | 0.062888 |
| TTLL8    | 0.939932 | 0.856629 | 1.031335 | 0.190763 |
| RNF185   | 1.080077 | 0.978009 | 1.192798 | 0.128279 |
| PARVG    | 1.114001 | 1.037296 | 1.196378 | 0.003017 |
| B4GALNT3 | 1.178328 | 1.067578 | 1.300567 | 0.00112  |
| PDE6H    | 0.975351 | 0.935453 | 1.01695  | 0.241517 |
| ERP27    | 0.979181 | 0.922919 | 1.038873 | 0.485911 |
| ETV6     | 0.89706  | 0.837777 | 0.960537 | 0.001845 |
| GABARAPI | 0.930231 | 0.877062 | 0.986624 | 0.016022 |
| KIF21A   | 1.06053  | 0.949014 | 1.185149 | 0.299847 |
| CPNE8    | 1.162815 | 1.121568 | 1.205579 | 2.70E-16 |
| YARS2    | 1.058267 | 0.962213 | 1.163911 | 0.2434   |
| FGD4     | 1.029232 | 0.978031 | 1.083114 | 0.268417 |

|          |          |          |          |          |
|----------|----------|----------|----------|----------|
| ALG10    | 1.030144 | 0.951746 | 1.115    | 0.462121 |
| AEBP2    | 0.958815 | 0.87191  | 1.054382 | 0.385623 |
| ETNK1    | 1.042139 | 0.970893 | 1.118614 | 0.253286 |
| ZCRB1    | 1.014388 | 0.908423 | 1.132713 | 0.799676 |
| TMEM117  | 1.104485 | 1.014671 | 1.20225  | 0.021646 |
| PRICKLE1 | 1.177605 | 1.08848  | 1.274027 | 4.67E-05 |
| C1RL     | 1.135739 | 1.057115 | 1.220211 | 0.000506 |
| NDUFA9   | 1.179195 | 1.052055 | 1.321699 | 0.004629 |
| CLSTN3   | 1.037729 | 0.97236  | 1.107494 | 0.264585 |
| KLRG1    | 1.238612 | 1.155624 | 1.327558 | 1.47E-09 |
| VAMP1    | 1.031725 | 0.962988 | 1.105367 | 0.374625 |
| TAPBPL   | 1.015807 | 0.926533 | 1.113683 | 0.738254 |
| CD27     | 0.999749 | 0.928841 | 1.07607  | 0.994662 |
| RBP5     | 1.018806 | 0.950415 | 1.092119 | 0.599221 |
| PEX5     | 1.044093 | 0.956537 | 1.139663 | 0.334253 |
| SLC38A4  | 0.973723 | 0.894321 | 1.060175 | 0.539508 |
| AMIGO2   | 0.987883 | 0.916173 | 1.065206 | 0.751192 |
| COL2A1   | 0.991813 | 0.921955 | 1.066965 | 0.825406 |
| LLPH     | 1.107991 | 0.988467 | 1.241968 | 0.078274 |
| INHBE    | 0.94669  | 0.835213 | 1.073046 | 0.391424 |
| GLIPR1   | 0.953605 | 0.895051 | 1.015989 | 0.141743 |
| PHLDA1   | 1.077798 | 1.029998 | 1.127816 | 0.001208 |
| TMEM19   | 1.092369 | 0.99602  | 1.198039 | 0.060751 |
| DUSP6    | 1.03197  | 0.988882 | 1.076935 | 0.148124 |
| TMTC3    | 1.161949 | 1.053238 | 1.28188  | 0.002745 |
| LUM      | 1.030255 | 0.956809 | 1.109339 | 0.429583 |
| SNRPF    | 1.046312 | 0.966672 | 1.132514 | 0.262376 |
| AMDHD1   | 0.896388 | 0.773526 | 1.038765 | 0.145864 |
| NEDD1    | 1.008035 | 0.929147 | 1.093621 | 0.847361 |
| SYCP3    | 0.97045  | 0.876583 | 1.074368 | 0.563324 |
| GAS2L3   | 1.238475 | 1.165793 | 1.315689 | 4.17E-12 |
| SLC15A4  | 0.997943 | 0.937176 | 1.06265  | 0.948778 |
| TDG      | 1.106428 | 1.011165 | 1.210665 | 0.027688 |
| SDSL     | 1.178665 | 1.106616 | 1.255404 | 3.26E-07 |
| MMAB     | 1.324962 | 1.175248 | 1.493747 | 4.23E-06 |
| GLTP     | 1.128485 | 1.026592 | 1.240491 | 0.012296 |
| GIT2     | 0.977692 | 0.898578 | 1.063772 | 0.600266 |
| TCHP     | 1.059114 | 0.964041 | 1.163563 | 0.231376 |
| MTMR6    | 0.898691 | 0.839506 | 0.962049 | 0.002119 |
| SLC46A3  | 1.259697 | 1.176327 | 1.348975 | 3.89E-11 |
| SLC7A1   | 1.049194 | 0.983366 | 1.119429 | 0.146337 |
| LNX2     | 1.063739 | 0.983254 | 1.150813 | 0.123739 |
| SUOX     | 1.073427 | 0.987769 | 1.166512 | 0.094933 |
| CCDC65   | 1.068554 | 0.995662 | 1.146782 | 0.06586  |
| SLC39A5  | 1.074206 | 0.957043 | 1.205713 | 0.224438 |
| TARBP2   | 1.093596 | 0.996916 | 1.199652 | 0.058151 |
| DHH      | 0.999228 | 0.922577 | 1.082248 | 0.984872 |
| ACVRL1   | 1.153609 | 1.067687 | 1.246445 | 0.000296 |
| GPR84    | 1.0719   | 1.020078 | 1.126354 | 0.006029 |
| N4BP2L1  | 0.973544 | 0.891087 | 1.063632 | 0.55266  |
| SMARCC2  | 1.041714 | 0.956641 | 1.134353 | 0.347123 |
| BRCA2    | 1.039956 | 0.968695 | 1.11646  | 0.279354 |
| MAP3K12  | 0.980225 | 0.918383 | 1.04623  | 0.548021 |
| ITGB7    | 1.008413 | 0.95702  | 1.062565 | 0.753598 |
| GALNT6   | 1.027186 | 0.949163 | 1.111622 | 0.505741 |
| CSAD     | 1.120334 | 1.033751 | 1.214169 | 0.005626 |
| LMBR1L   | 0.943128 | 0.886076 | 1.003853 | 0.065892 |
| ESYT1    | 0.931729 | 0.872751 | 0.994692 | 0.034049 |



|         |          |          |          |          |
|---------|----------|----------|----------|----------|
| TMBIM6  | 0.958106 | 0.868062 | 1.05749  | 0.395386 |
| ANKRD52 | 1.014761 | 0.941116 | 1.094169 | 0.703057 |
| ZNF740  | 1.024292 | 0.956628 | 1.096743 | 0.491239 |
| WDFY2   | 0.969088 | 0.909943 | 1.032077 | 0.328428 |
| HNRNPA1 | 0.961204 | 0.880594 | 1.049193 | 0.375936 |
| ESD     | 0.942243 | 0.856321 | 1.036787 | 0.222672 |
| RB1     | 1.041498 | 0.968468 | 1.120036 | 0.272997 |
| SBNO1   | 1.036446 | 0.967158 | 1.110697 | 0.310572 |
| MORN3   | 1.048175 | 0.964515 | 1.139093 | 0.267584 |
| SETD1B  | 1.029703 | 0.950579 | 1.115413 | 0.473055 |
| VPS33A  | 1.156753 | 1.046458 | 1.278673 | 0.004397 |
| VPS37B  | 0.861719 | 0.797918 | 0.930621 | 0.000149 |
| RHOF    | 1.05673  | 0.95306  | 1.171677 | 0.294925 |
| DENR    | 1.032814 | 0.939125 | 1.135851 | 0.505751 |
| DIAPH3  | 1.121145 | 1.038239 | 1.210672 | 0.00353  |
| SLAIN1  | 0.99826  | 0.946103 | 1.053292 | 0.949284 |
| RBM26   | 0.975297 | 0.900546 | 1.056253 | 0.538681 |
| MBNL2   | 0.870179 | 0.821119 | 0.922169 | 2.64E-06 |
| ABHD13  | 1.022495 | 0.933087 | 1.120471 | 0.633714 |
| RAB20   | 0.969424 | 0.916975 | 1.024873 | 0.273858 |
| GRTP1   | 1.001961 | 0.937433 | 1.07093  | 0.954008 |
| CUL4A   | 0.983018 | 0.896844 | 1.077472 | 0.714437 |
| CDH24   | 1.065187 | 0.998174 | 1.136699 | 0.056803 |
| REM2    | 1.07187  | 1.007196 | 1.140697 | 0.028832 |
| CBLN3   | 1.256605 | 1.125116 | 1.403461 | 5.11E-05 |
| TSSK4   | 1.015331 | 0.949818 | 1.085364 | 0.654808 |
| TMX1    | 1.105508 | 1.015725 | 1.203228 | 0.020287 |
| FRMD6   | 1.00975  | 0.890649 | 1.144778 | 0.879563 |
| PELI2   | 0.983379 | 0.925985 | 1.044331 | 0.584892 |
| RTN1    | 1.138227 | 1.073569 | 1.206778 | 1.43E-05 |
| SLC38A6 | 1.173925 | 1.058567 | 1.301855 | 0.002378 |
| RDH12   | 1.023286 | 0.933888 | 1.121242 | 0.621645 |
| RAB15   | 1.019334 | 0.953966 | 1.089182 | 0.571186 |
| WDR89   | 1.060518 | 0.975924 | 1.152444 | 0.165942 |
| ESR2    | 1.013106 | 0.91923  | 1.116569 | 0.792976 |
| STON2   | 0.940535 | 0.901911 | 0.980812 | 0.004163 |
| GPR65   | 0.942955 | 0.87408  | 1.017257 | 0.129057 |
| PTGR2   | 1.0676   | 0.917605 | 1.242114 | 0.397106 |
| JDP2    | 0.929479 | 0.875861 | 0.986378 | 0.015848 |
| AK7     | 1.258184 | 1.100143 | 1.438929 | 0.000798 |
| SLC24A4 | 1.013994 | 0.955497 | 1.076071 | 0.646682 |
| FBLN5   | 0.906972 | 0.853158 | 0.964181 | 0.001755 |
| WDR20   | 0.979093 | 0.910147 | 1.053261 | 0.570622 |
| NIPA2   | 1.026899 | 0.93202  | 1.131436 | 0.59152  |
| SLC12A6 | 0.978906 | 0.917078 | 1.044902 | 0.521864 |
| MFAP1   | 0.973431 | 0.896619 | 1.056824 | 0.520806 |
| TCF12   | 0.941386 | 0.873178 | 1.014921 | 0.115487 |
| SORD    | 0.883388 | 0.807012 | 0.966993 | 0.0072   |
| SERF2   | 1.019226 | 0.916531 | 1.133429 | 0.72525  |
| ZSCAN29 | 1.053079 | 0.9759   | 1.136363 | 0.182935 |
| LYSMD2  | 0.947542 | 0.872968 | 1.028486 | 0.197615 |
| SLC27A2 | 0.868116 | 0.816436 | 0.923067 | 6.29E-06 |
| HDC     | 0.860591 | 0.82905  | 0.89333  | 3.25E-15 |
| BNIP2   | 0.918053 | 0.845741 | 0.996549 | 0.041097 |
| GTF2A2  | 1.212986 | 1.092079 | 1.347279 | 0.000313 |
| SRP14   | 0.982092 | 0.903918 | 1.067026 | 0.669381 |
| BAHD1   | 0.929377 | 0.861214 | 1.002934 | 0.059487 |
| DISP2   | 1.085732 | 0.9689   | 1.21665  | 0.156758 |

|         |          |          |          |          |
|---------|----------|----------|----------|----------|
| CDAN1   | 1.003583 | 0.938967 | 1.072645 | 0.916122 |
| TLE3    | 1.088931 | 1.018409 | 1.164336 | 0.012633 |
| ANP32A  | 1.018768 | 0.930768 | 1.115088 | 0.686652 |
| COMMD4  | 1.462464 | 1.309161 | 1.633719 | 1.72E-11 |
| UBE2Q2  | 0.926586 | 0.852913 | 1.006622 | 0.071259 |
| PSTPIP1 | 1.106522 | 1.046533 | 1.169949 | 0.000372 |
| ETFA    | 1.069288 | 0.973952 | 1.173955 | 0.159716 |
| BCL2A1  | 1.004851 | 0.964068 | 1.04736  | 0.818917 |
| HMG20A  | 1.019965 | 0.933462 | 1.114484 | 0.661975 |
| SCAPER  | 1.055498 | 0.972499 | 1.145581 | 0.196145 |
| TSPAN3  | 1.069406 | 0.969113 | 1.180079 | 0.181701 |
| WDR61   | 1.344666 | 1.20441  | 1.501256 | 1.37E-07 |
| NCOA2   | 1.011323 | 0.944032 | 1.08341  | 0.748592 |
| NEIL1   | 1.134065 | 1.066645 | 1.205746 | 5.74E-05 |
| MAN2C1  | 1.02833  | 0.958512 | 1.103234 | 0.436118 |
| DNAJA4  | 1.096649 | 1.042408 | 1.153711 | 0.000364 |
| TPM1    | 1.225959 | 1.153108 | 1.303413 | 7.14E-11 |
| IGF1R   | 0.966709 | 0.924446 | 1.010905 | 0.137689 |
| ARRDC4  | 1.077603 | 1.016182 | 1.142738 | 0.012558 |
| PIF1    | 1.233147 | 1.138865 | 1.335235 | 2.41E-07 |
| USP3    | 0.968461 | 0.90567  | 1.035605 | 0.348753 |
| BBS4    | 1.079827 | 0.982614 | 1.186657 | 0.110584 |
| PML     | 0.907218 | 0.831773 | 0.989506 | 0.027941 |
| CYP1A1  | 0.978663 | 0.855449 | 1.119624 | 0.753406 |
| ADAMTS1 | 1.137404 | 1.005393 | 1.286747 | 0.040814 |
| LINS1   | 1.180388 | 1.075157 | 1.29592  | 0.0005   |
| ULK3    | 1.149102 | 1.052335 | 1.254768 | 0.001958 |
| PCSK6   | 0.797753 | 0.683875 | 0.930594 | 0.004036 |
| SCAMP2  | 1.050759 | 0.945747 | 1.167431 | 0.356712 |
| HAPLN3  | 1.071104 | 1.010162 | 1.135722 | 0.021547 |
| POLG    | 1.023883 | 0.955664 | 1.096972 | 0.502276 |
| RLBP1   | 0.989439 | 0.93638  | 1.045504 | 0.705758 |
| FANCI   | 1.073864 | 1.002383 | 1.150443 | 0.042591 |
| ABHD2   | 0.978416 | 0.917963 | 1.042851 | 0.502507 |
| DET1    | 1.008381 | 0.900199 | 1.129564 | 0.885389 |
| MFGE8   | 1.073277 | 1.010315 | 1.140161 | 0.021866 |
| ZNF710  | 0.995089 | 0.924651 | 1.070892 | 0.895425 |
| UNC45A  | 1.050541 | 0.964906 | 1.143776 | 0.255744 |
| MCTP2   | 0.967933 | 0.924317 | 1.013607 | 0.165912 |
| FURIN   | 0.947354 | 0.880747 | 1.018999 | 0.145952 |
| IQGAP1  | 0.972943 | 0.91467  | 1.03493  | 0.384063 |
| CRTC3   | 0.955591 | 0.883461 | 1.033611 | 0.25663  |
| SEC11A  | 0.859871 | 0.775621 | 0.953273 | 0.004111 |
| PMM2    | 1.102267 | 1.005661 | 1.208152 | 0.037471 |
| ITGAX   | 1.104457 | 1.051558 | 1.160016 | 7.26E-05 |
| TGFB111 | 0.901596 | 0.830275 | 0.979043 | 0.013751 |
| ARMC5   | 1.066587 | 1.002164 | 1.135151 | 0.042565 |
| PARN    | 1.054922 | 0.966686 | 1.151212 | 0.230251 |
| FTO     | 0.998992 | 0.936464 | 1.065695 | 0.975608 |
| UQCRC2  | 0.906922 | 0.824213 | 0.997931 | 0.045241 |
| CDR2    | 0.91966  | 0.856436 | 0.987552 | 0.021185 |
| IGSF6   | 1.007295 | 0.94476  | 1.073969 | 0.824104 |
| ARHGAP1 | 0.920198 | 0.850099 | 0.996078 | 0.039671 |
| NKD1    | 1.059553 | 0.982808 | 1.142292 | 0.131577 |
| DHX38   | 0.964192 | 0.885966 | 1.049325 | 0.398293 |
| TXNL4B  | 1.170913 | 1.039183 | 1.31934  | 0.009565 |
| ZFHX3   | 0.921668 | 0.865228 | 0.981789 | 0.011406 |
| CPNE2   | 1.021061 | 0.949295 | 1.098253 | 0.575115 |

|          |          |          |          |          |
|----------|----------|----------|----------|----------|
| NLRC5    | 1.023602 | 0.965778 | 1.084888 | 0.431705 |
| KATNB1   | 1.047282 | 0.968417 | 1.13257  | 0.247454 |
| KIFC3    | 1.120286 | 1.058893 | 1.185239 | 7.82E-05 |
| ADAMTS1  | 1.068136 | 0.981537 | 1.162376 | 0.126521 |
| NUDT7    | 1.085696 | 1.000693 | 1.177921 | 0.048085 |
| GCSH     | 1.355629 | 1.133977 | 1.620606 | 0.000837 |
| CMTM3    | 0.873275 | 0.815499 | 0.935144 | 0.000104 |
| CMTM2    | 1.049475 | 0.985061 | 1.118101 | 0.13512  |
| NOL3     | 1.155238 | 1.044462 | 1.277762 | 0.005019 |
| MAP1LC3F | 0.905943 | 0.834518 | 0.98348  | 0.018397 |
| MBTPS1   | 0.906438 | 0.84081  | 0.977189 | 0.010416 |
| ZCCHC14  | 1.026212 | 0.961896 | 1.094829 | 0.433312 |
| OSGIN1   | 1.022377 | 0.927994 | 1.126359 | 0.65429  |
| IRF8     | 1.091036 | 1.043027 | 1.141254 | 0.000148 |
| RHOT2    | 1.087521 | 0.996007 | 1.187445 | 0.06138  |
| RPL3L    | 1.092469 | 0.949093 | 1.257504 | 0.217918 |
| RPS2     | 0.867598 | 0.805353 | 0.934654 | 0.000185 |
| NDUFB10  | 1.065097 | 0.974903 | 1.163634 | 0.162429 |
| PDPK1    | 0.992829 | 0.912488 | 1.080243 | 0.867236 |
| TIGD7    | 1.20087  | 1.014694 | 1.421204 | 0.033198 |
| DEF8     | 1.011969 | 0.942353 | 1.086727 | 0.743538 |
| TCF25    | 0.966913 | 0.877563 | 1.06536  | 0.496412 |
| GALNS    | 1.049532 | 0.967351 | 1.138694 | 0.245205 |
| GAS8     | 1.186513 | 1.042804 | 1.350025 | 0.009424 |
| MED9     | 1.115022 | 1.020879 | 1.217846 | 0.015558 |
| NCOR1    | 0.968543 | 0.899909 | 1.042413 | 0.394044 |
| COPS3    | 0.940783 | 0.847649 | 1.04415  | 0.251099 |
| ZNF287   | 1.63182  | 1.405201 | 1.894986 | 1.37E-10 |
| KSR1     | 0.951191 | 0.891562 | 1.014809 | 0.129791 |
| RANBP10  | 0.964054 | 0.898848 | 1.033991 | 0.305595 |
| DPEP3    | 0.996055 | 0.94489  | 1.04999  | 0.883192 |
| GFOD2    | 1.01936  | 0.939569 | 1.105928 | 0.644739 |
| NOB1     | 0.87551  | 0.801659 | 0.956165 | 0.003107 |
| PRPSAP2  | 1.229002 | 1.108958 | 1.36204  | 8.42E-05 |
| PCTP     | 1.074286 | 0.981305 | 1.176076 | 0.12081  |
| TOM1L1   | 1.194971 | 1.109227 | 1.287343 | 2.75E-06 |
| TOB1     | 0.889688 | 0.83954  | 0.942831 | 7.86E-05 |
| VPS53    | 1.039826 | 0.959408 | 1.126985 | 0.341635 |
| SGSM2    | 0.97479  | 0.898657 | 1.057374 | 0.538302 |
| NPEPPS   | 0.9726   | 0.900016 | 1.051038 | 0.482644 |
| SKAP1    | 0.952665 | 0.896104 | 1.012797 | 0.120476 |
| LRRRC46  | 1.118879 | 0.988821 | 1.266043 | 0.074806 |
| SCRN2    | 1.06579  | 0.9794   | 1.1598   | 0.139586 |
| SSH2     | 0.922624 | 0.858372 | 0.991687 | 0.02877  |
| RHBDL3   | 1.046248 | 0.98407  | 1.112355 | 0.148105 |
| ARSG     | 1.145771 | 1.050682 | 1.249465 | 0.002081 |
| G6PC3    | 1.074158 | 0.98731  | 1.168647 | 0.096301 |
| CLTC     | 0.997249 | 0.931588 | 1.067538 | 0.936814 |
| BCAS3    | 1.117716 | 1.029885 | 1.213038 | 0.007695 |
| PTRH2    | 1.015223 | 0.935143 | 1.10216  | 0.718557 |
| SS18     | 0.971723 | 0.897373 | 1.052232 | 0.479993 |
| TAF4B    | 0.967293 | 0.90612  | 1.032596 | 0.318446 |
| AFG3L2   | 0.975135 | 0.88979  | 1.068667 | 0.590016 |
| IMPA2    | 0.953621 | 0.896427 | 1.014464 | 0.132355 |
| GNAL     | 1.142355 | 0.941096 | 1.386654 | 0.178306 |
| SLC39A6  | 1.106406 | 1.01763  | 1.202927 | 0.017813 |
| RPRD1A   | 1.056347 | 0.977509 | 1.141544 | 0.166006 |
| GALNT1   | 0.906693 | 0.843071 | 0.975115 | 0.008319 |

|          |          |          |          |          |
|----------|----------|----------|----------|----------|
| ADCYAP1  | 0.960095 | 0.824362 | 1.118178 | 0.600529 |
| ESCO1    | 1.029445 | 0.948733 | 1.117023 | 0.486044 |
| OSBPL1A  | 1.011911 | 0.955733 | 1.071392 | 0.684508 |
| PELP1    | 0.935823 | 0.853719 | 1.025824 | 0.156846 |
| NPC1     | 0.957139 | 0.89256  | 1.026392 | 0.21904  |
| SLC14A1  | 0.949795 | 0.898634 | 1.003868 | 0.068257 |
| ARRB2    | 0.958108 | 0.892125 | 1.028971 | 0.239798 |
| ZMYND15  | 1.129789 | 1.033843 | 1.234638 | 0.007039 |
| MINK1    | 1.013871 | 0.94     | 1.093549 | 0.721162 |
| SAT2     | 0.947788 | 0.858288 | 1.046622 | 0.289335 |
| ASGR1    | 1.163429 | 1.05771  | 1.279714 | 0.001844 |
| PIK3R5   | 1.073613 | 1.011387 | 1.139668 | 0.01972  |
| TP53     | 1.076189 | 1.009492 | 1.147293 | 0.024489 |
| ARHGDI1  | 0.874145 | 0.813836 | 0.938924 | 0.000226 |
| TMC6     | 1.045816 | 0.969769 | 1.127826 | 0.244828 |
| SLC16A3  | 1.052671 | 1.002526 | 1.105324 | 0.039275 |
| CARD14   | 1.081828 | 0.954669 | 1.225923 | 0.217643 |
| TTYH2    | 0.885172 | 0.820552 | 0.954881 | 0.001612 |
| RAB40B   | 1.354285 | 1.221714 | 1.501241 | 7.93E-09 |
| EIF4A3   | 0.968834 | 0.897774 | 1.045518 | 0.415269 |
| CSNK1D   | 1.014283 | 0.948985 | 1.084075 | 0.676151 |
| ANAPC11  | 1.178852 | 1.072156 | 1.296166 | 0.000675 |
| TBCD     | 1.192386 | 1.100534 | 1.291904 | 1.69E-05 |
| FN3KRP   | 1.217545 | 1.106945 | 1.339197 | 5.10E-05 |
| NARF     | 1.110531 | 1.029514 | 1.197923 | 0.006677 |
| RPTOR    | 0.959407 | 0.892042 | 1.031859 | 0.264578 |
| FOXK2    | 0.977456 | 0.891054 | 1.072237 | 0.629174 |
| TRIM65   | 1.012887 | 0.941878 | 1.089249 | 0.72988  |
| CBX8     | 0.978267 | 0.892141 | 1.072707 | 0.64028  |
| SECTM1   | 1.050957 | 1.002268 | 1.102012 | 0.040016 |
| RNF157   | 1.13759  | 1.03042  | 1.255906 | 0.010663 |
| ZNF750   | 1.106422 | 1.003095 | 1.220392 | 0.043203 |
| CBX4     | 0.973449 | 0.907762 | 1.043889 | 0.450281 |
| RNF165   | 1.148162 | 1.026505 | 1.284236 | 0.015617 |
| DYM      | 0.919309 | 0.830505 | 1.017609 | 0.104549 |
| ELAC1    | 1.19699  | 1.059575 | 1.352226 | 0.003852 |
| MBD1     | 1.00493  | 0.911876 | 1.10748  | 0.920985 |
| SMAD4    | 0.973495 | 0.908558 | 1.043074 | 0.445669 |
| TNFRSF11 | 1.111391 | 1.032535 | 1.19627  | 0.004914 |
| ZCCHC2   | 1.118263 | 1.046967 | 1.194414 | 0.000883 |
| PMAIP1   | 0.940734 | 0.883878 | 1.001248 | 0.054763 |
| ERBB2    | 1.164215 | 1.032185 | 1.313133 | 0.013295 |
| PNMT     | 0.91146  | 0.856643 | 0.969786 | 0.003396 |
| ARL5C    | 0.947358 | 0.838997 | 1.069714 | 0.382891 |
| IGFBP4   | 1.033887 | 0.982063 | 1.088446 | 0.204041 |
| FKBP10   | 1.192996 | 1.12205  | 1.268428 | 1.69E-08 |
| TXNL4A   | 1.029451 | 0.915006 | 1.158209 | 0.629292 |
| SAMD1    | 1.021754 | 0.941014 | 1.109422 | 0.608374 |
| BRD4     | 1.016326 | 0.927551 | 1.113597 | 0.7284   |
| SLC39A3  | 1.059462 | 0.987327 | 1.136868 | 0.10839  |
| NFIC     | 0.823897 | 0.760729 | 0.89231  | 1.94E-06 |
| PRDM15   | 1.033933 | 0.948242 | 1.127367 | 0.449663 |
| PFKL     | 1.001042 | 0.923451 | 1.085153 | 0.979812 |
| FEM1A    | 1.103471 | 0.991972 | 1.227503 | 0.07004  |
| VAV1     | 1.1795   | 1.096636 | 1.268625 | 8.91E-06 |
| CIB3     | 1.159204 | 1.065758 | 1.260843 | 0.000571 |
| SH3GL1   | 0.943956 | 0.863909 | 1.03142  | 0.202065 |
| DUS3L    | 0.9883   | 0.90713  | 1.076734 | 0.787817 |

|           |          |          |          |          |
|-----------|----------|----------|----------|----------|
| DPP9      | 0.939714 | 0.839848 | 1.051455 | 0.278059 |
| CCDC97    | 1.050067 | 0.959744 | 1.148891 | 0.287058 |
| TMEM91    | 1.144739 | 1.040771 | 1.259094 | 0.005393 |
| ZFP14     | 0.984039 | 0.908677 | 1.065651 | 0.692248 |
| SIRT3     | 1.029106 | 0.934112 | 1.13376  | 0.5615   |
| IFITM3    | 1.003078 | 0.966579 | 1.040955 | 0.870913 |
| COL6A1    | 1.009786 | 0.956906 | 1.065588 | 0.722714 |
| IFNAR1    | 1.007647 | 0.925166 | 1.097482 | 0.861209 |
| SOD1      | 1.159772 | 1.052358 | 1.278149 | 0.002798 |
| COL6A2    | 0.975476 | 0.920293 | 1.033968 | 0.40333  |
| SIK1      | 0.956301 | 0.897035 | 1.019483 | 0.171049 |
| TRPM2     | 1.012303 | 0.962607 | 1.064564 | 0.633992 |
| SCYL1     | 0.948724 | 0.862334 | 1.04377  | 0.279896 |
| TMEM50B   | 1.120867 | 1.022278 | 1.228963 | 0.01514  |
| APP       | 0.937495 | 0.907334 | 0.96866  | 0.00011  |
| URB1      | 1.039591 | 0.981238 | 1.101414 | 0.187718 |
| AKT1      | 0.959771 | 0.884828 | 1.041061 | 0.32224  |
| EMP3      | 0.918464 | 0.856841 | 0.984519 | 0.016383 |
| SAE1      | 1.173075 | 1.06029  | 1.297858 | 0.001968 |
| NTN5      | 1.307181 | 1.133515 | 1.507454 | 0.00023  |
| LMTK3     | 1.248013 | 1.127496 | 1.381412 | 1.90E-05 |
| GEMIN7    | 1.111413 | 1.003172 | 1.231334 | 0.043328 |
| ADAMTS1   | 1.104343 | 1.056366 | 1.154498 | 1.19E-05 |
| RNPEPL1   | 1.071652 | 0.974231 | 1.178814 | 0.154711 |
| CAPN10    | 1.085155 | 0.998788 | 1.178991 | 0.053446 |
| MYO1F     | 1.010344 | 0.950109 | 1.074399 | 0.742811 |
| NLRP12    | 1.073563 | 1.026393 | 1.122901 | 0.00196  |
| ZNF787    | 1.004095 | 0.911956 | 1.105544 | 0.93368  |
| CARM1     | 1.038108 | 0.93904  | 1.147627 | 0.464874 |
| EVI5L     | 1.173693 | 1.076827 | 1.279272 | 0.000268 |
| SLC47A1   | 1.08464  | 0.990558 | 1.187657 | 0.079253 |
| PSMB6     | 1.103325 | 1.011372 | 1.203639 | 0.026784 |
| GPR32     | 0.976811 | 0.909067 | 1.049603 | 0.522297 |
| SIGLEC10  | 1.081951 | 1.016526 | 1.151588 | 0.013324 |
| ZNF473    | 1.115592 | 1.021723 | 1.218085 | 0.01472  |
| FAM71E1   | 1.167922 | 0.9981   | 1.366639 | 0.052838 |
| RPS11     | 0.92244  | 0.858504 | 0.991137 | 0.027603 |
| PTH2      | 1.117751 | 1.033956 | 1.208337 | 0.005113 |
| RPL13A    | 0.870577 | 0.799045 | 0.948512 | 0.001533 |
| NOSIP     | 1.110464 | 0.992994 | 1.241831 | 0.066252 |
| RCN3      | 1.047603 | 0.986335 | 1.112678 | 0.130413 |
| ZNF614    | 1.020166 | 0.936988 | 1.110728 | 0.645442 |
| SLC2A5    | 1.065664 | 1.015336 | 1.118488 | 0.009979 |
| RERE      | 0.908556 | 0.834153 | 0.989595 | 0.027814 |
| PRDM16    | 1.084689 | 1.042467 | 1.128621 | 5.99E-05 |
| PADI3     | 0.926945 | 0.841515 | 1.021047 | 0.124108 |
| EPHA2     | 1.100797 | 1.015859 | 1.192837 | 0.019078 |
| ARHGEF19  | 1.09037  | 0.998328 | 1.190897 | 0.054509 |
| EFHD2     | 1.021804 | 0.941298 | 1.109196 | 0.606452 |
| PEX14     | 1.015771 | 0.913675 | 1.129276 | 0.772173 |
| PGD       | 0.947402 | 0.874728 | 1.026114 | 0.184546 |
| SH3BGRL3  | 0.999776 | 0.946253 | 1.056326 | 0.993631 |
| CNKSR1    | 0.969847 | 0.85084  | 1.1055   | 0.646685 |
| RPL11     | 0.958142 | 0.907506 | 1.011603 | 0.122701 |
| KIAA0319L | 1.005006 | 0.926278 | 1.090425 | 0.904507 |
| PLK4      | 1.05415  | 0.979025 | 1.135039 | 0.162113 |
| MAP3K6    | 1.053271 | 0.984371 | 1.126993 | 0.132685 |
| GPN2      | 1.0014   | 0.921528 | 1.088196 | 0.973678 |

|          |          |          |          |          |
|----------|----------|----------|----------|----------|
| SYTL1    | 1.022058 | 0.962394 | 1.085422 | 0.477114 |
| WDTC1    | 0.914567 | 0.84624  | 0.98841  | 0.024182 |
| NBPF3    | 1.078555 | 1.008475 | 1.153505 | 0.027372 |
| HSPG2    | 0.925783 | 0.884397 | 0.969105 | 0.00095  |
| ITGB3BP  | 1.150536 | 1.047481 | 1.26373  | 0.003402 |
| SERBP1   | 1.049174 | 0.950515 | 1.158074 | 0.340733 |
| BCL10    | 1.03959  | 0.948039 | 1.139982 | 0.409097 |
| PRKACB   | 1.047899 | 0.981126 | 1.119217 | 0.16369  |
| PIGK     | 1.064664 | 0.994065 | 1.140278 | 0.073469 |
| TINAGL1  | 0.823363 | 0.745194 | 0.909732 | 0.000134 |
| RPS8     | 0.895063 | 0.82294  | 0.973506 | 0.009698 |
| KIF2C    | 1.140939 | 1.062277 | 1.225426 | 0.000297 |
| PTPRF    | 1.142629 | 1.066869 | 1.223768 | 0.000139 |
| BEST4    | 1.183815 | 1.056444 | 1.326542 | 0.003668 |
| LMO4     | 1.098399 | 1.037796 | 1.16254  | 0.00119  |
| MTF2     | 0.957303 | 0.894227 | 1.024828 | 0.209569 |
| IGSF3    | 1.099344 | 1.008731 | 1.198096 | 0.030924 |
| ZNF697   | 0.863636 | 0.80392  | 0.927788 | 6.07E-05 |
| CTTNBP2N | 1.140445 | 1.060572 | 1.226333 | 0.000389 |
| PSMA5    | 1.23943  | 1.100786 | 1.395536 | 0.00039  |
| FNDC7    | 0.97746  | 0.921333 | 1.037006 | 0.449879 |
| CD53     | 0.883779 | 0.823673 | 0.948271 | 0.000586 |
| CELSR2   | 1.227274 | 1.134325 | 1.327839 | 3.46E-07 |
| ITGA10   | 1.028027 | 0.909373 | 1.162162 | 0.658675 |
| GPR161   | 1.131219 | 1.004933 | 1.273374 | 0.041208 |
| ALDH9A1  | 1.038128 | 0.946575 | 1.138535 | 0.426976 |
| ATP1B1   | 0.959664 | 0.910441 | 1.011549 | 0.125393 |
| TIPRL    | 1.211411 | 1.090418 | 1.34583  | 0.000354 |
| NME7     | 1.067666 | 0.974215 | 1.170082 | 0.161217 |
| POGK     | 1.099137 | 1.010812 | 1.195181 | 0.026997 |
| CREG1    | 0.898492 | 0.8233   | 0.98055  | 0.016375 |
| DCAF6    | 0.942786 | 0.875267 | 1.015513 | 0.120201 |
| GPA33    | 0.942427 | 0.897363 | 0.989753 | 0.017694 |
| TBX19    | 0.988429 | 0.907481 | 1.076597 | 0.78949  |
| UCK2     | 1.027196 | 0.958497 | 1.100818 | 0.447405 |
| TMCO1    | 1.151854 | 1.040246 | 1.275436 | 0.006552 |
| XCL1     | 1.066125 | 0.983658 | 1.155506 | 0.119039 |
| XCL2     | 1.069064 | 1.003437 | 1.138982 | 0.038816 |
| POU2F1   | 0.93634  | 0.867422 | 1.010733 | 0.091743 |
| ILDR2    | 1.061868 | 0.992484 | 1.136102 | 0.081657 |
| MGST3    | 1.034897 | 0.935917 | 1.144344 | 0.503651 |
| ADCY10   | 1.068125 | 0.939764 | 1.21402  | 0.31302  |
| UFC1     | 0.927093 | 0.83926  | 1.024118 | 0.136047 |
| PPOX     | 1.156349 | 1.071496 | 1.247922 | 0.000187 |
| FCGR2A   | 0.98653  | 0.935711 | 1.040109 | 0.615267 |
| NUF2     | 1.148886 | 1.070567 | 1.232934 | 0.000117 |
| RGS5     | 1.217507 | 1.033076 | 1.434863 | 0.018863 |
| SDHC     | 1.078877 | 1.000034 | 1.163935 | 0.049896 |
| PFDN2    | 0.984247 | 0.904937 | 1.070507 | 0.711053 |
| NR1I3    | 1.097682 | 1.027539 | 1.172613 | 0.005669 |
| USP21    | 1.056854 | 0.959919 | 1.163578 | 0.259927 |
| PRCC     | 1.030387 | 0.922319 | 1.151117 | 0.59644  |
| FCRL5    | 1.000051 | 0.916251 | 1.091516 | 0.999082 |
| MRPL24   | 1.091829 | 1.019334 | 1.169481 | 0.012203 |
| PIGM     | 1.192242 | 1.10736  | 1.28363  | 3.07E-06 |
| CASQ1    | 0.975303 | 0.91032  | 1.044924 | 0.477189 |
| ISG20L2  | 1.066434 | 0.960085 | 1.184563 | 0.230133 |
| CRABP2   | 1.022816 | 0.956733 | 1.093464 | 0.507969 |

|          |          |          |          |          |
|----------|----------|----------|----------|----------|
| HDGF     | 0.937099 | 0.850368 | 1.032675 | 0.189829 |
| ABL2     | 0.964533 | 0.893374 | 1.041361 | 0.355752 |
| XPR1     | 1.078615 | 0.985198 | 1.180891 | 0.101564 |
| RGS16    | 1.131234 | 1.083253 | 1.18134  | 2.46E-08 |
| TOR1AIP1 | 0.950161 | 0.877379 | 1.028981 | 0.208634 |
| RGL1     | 1.047048 | 0.976591 | 1.122588 | 0.195834 |
| LYPLAL1  | 1.062352 | 0.973842 | 1.158906 | 0.172959 |
| LHX9     | 0.834743 | 0.676177 | 1.030494 | 0.09286  |
| TUFT1    | 1.072038 | 1.009557 | 1.138387 | 0.023183 |
| SF3B4    | 0.969788 | 0.893233 | 1.052905 | 0.464662 |
| ECM1     | 0.999171 | 0.950309 | 1.050546 | 0.974147 |
| ZNF687   | 0.972554 | 0.902665 | 1.047853 | 0.464513 |
| TARS2    | 1.23015  | 1.114564 | 1.357724 | 3.88E-05 |
| SNX27    | 1.045351 | 0.977339 | 1.118096 | 0.196296 |
| SETDB1   | 0.983406 | 0.898038 | 1.076889 | 0.717979 |
| ADAMTSL  | 0.984116 | 0.927552 | 1.044129 | 0.596004 |
| MCL1     | 0.944966 | 0.883991 | 1.010146 | 0.096247 |
| CTSK     | 1.038846 | 0.95698  | 1.127715 | 0.362829 |
| RFX5     | 0.973389 | 0.896407 | 1.056982 | 0.521112 |
| PI4KB    | 0.952279 | 0.87353  | 1.038127 | 0.266865 |
| PIP5K1A  | 0.985291 | 0.91469  | 1.061341 | 0.696083 |
| ANP32E   | 1.127791 | 1.040208 | 1.222749 | 0.003549 |
| ANXA9    | 0.970133 | 0.906146 | 1.038638 | 0.383754 |
| SELENBP1 | 0.989069 | 0.957085 | 1.022121 | 0.512225 |
| ENSA     | 0.890214 | 0.790827 | 1.002093 | 0.054186 |
| SEMA6C   | 1.194535 | 1.114813 | 1.279959 | 4.56E-07 |
| MRPL9    | 1.128106 | 1.009548 | 1.260587 | 0.033363 |
| ARNT     | 1.022452 | 0.939586 | 1.112627 | 0.606624 |
| POGZ     | 0.957342 | 0.879531 | 1.042037 | 0.313492 |
| HORMAD   | 0.942871 | 0.873518 | 1.01773  | 0.131274 |
| GOLPH3L  | 1.033246 | 0.964935 | 1.106392 | 0.348683 |
| GABPB2   | 1.139851 | 1.047517 | 1.240324 | 0.002389 |
| DTL      | 1.04092  | 0.97232  | 1.114361 | 0.248921 |
| DYRK3    | 1.034359 | 0.975757 | 1.09648  | 0.256276 |
| INTS7    | 1.046977 | 0.985428 | 1.11237  | 0.137524 |
| VASH2    | 1.262328 | 1.1574   | 1.376769 | 1.43E-07 |
| TAF1A    | 1.100326 | 1.005383 | 1.204236 | 0.037842 |
| SMYD2    | 0.879318 | 0.805604 | 0.959777 | 0.00399  |
| SUSD4    | 1.273857 | 1.110187 | 1.461657 | 0.000561 |
| DUSP10   | 0.921988 | 0.867334 | 0.980085 | 0.009183 |
| TP53BP2  | 0.856584 | 0.80155  | 0.915395 | 4.90E-06 |
| ATP8B2   | 1.011804 | 0.952551 | 1.074741 | 0.703112 |
| ADAM15   | 0.963152 | 0.895373 | 1.036061 | 0.313247 |
| JTB      | 1.332486 | 1.196026 | 1.484515 | 1.92E-07 |
| RAB13    | 1.017522 | 0.943171 | 1.097733 | 0.653663 |
| S100A8   | 1.020772 | 0.994019 | 1.048245 | 0.129201 |
| TPM3     | 0.944028 | 0.849637 | 1.048906 | 0.283887 |
| NUP210L  | 0.956718 | 0.901216 | 1.015637 | 0.14675  |
| SNAPIN   | 1.181326 | 1.07089  | 1.303151 | 0.000876 |
| SLC27A3  | 1.046403 | 0.980353 | 1.116903 | 0.172725 |
| UBAP2L   | 0.941711 | 0.848452 | 1.04522  | 0.259011 |
| SLC39A1  | 0.983738 | 0.873214 | 1.108251 | 0.787442 |
| HAX1     | 1.04262  | 0.931283 | 1.167268 | 0.468835 |
| CREB3L4  | 1.053912 | 0.969006 | 1.146258 | 0.220468 |
| EFNA3    | 1.134289 | 0.951647 | 1.351985 | 0.159522 |
| AQP10    | 1.132616 | 1.024489 | 1.252155 | 0.014993 |
| GATAD2B  | 0.962013 | 0.892431 | 1.03702  | 0.312015 |
| ILF2     | 1.012524 | 0.916646 | 1.118432 | 0.806283 |

|                      |          |          |          |          |
|----------------------|----------|----------|----------|----------|
| RIT1                 | 0.904667 | 0.849465 | 0.963455 | 0.001815 |
| INTS3                | 1.073179 | 1.009132 | 1.14129  | 0.02448  |
| PKLR                 | 1.006464 | 0.955074 | 1.06062  | 0.809582 |
| HCN3                 | 1.216733 | 1.103014 | 1.342177 | 8.91E-05 |
| ACTA1                | 1.111264 | 0.978539 | 1.261991 | 0.104022 |
| GALNT2               | 0.936073 | 0.867414 | 1.010167 | 0.089189 |
| TTC13                | 1.089598 | 1.016025 | 1.1685   | 0.016143 |
| SCCPDH               | 0.883064 | 0.827164 | 0.942741 | 0.000194 |
| LYST                 | 0.998504 | 0.953385 | 1.045758 | 0.949392 |
| CEP170               | 0.877084 | 0.819538 | 0.938671 | 0.000152 |
| ACP1                 | 1.035483 | 0.929227 | 1.153889 | 0.527914 |
| SNAP47               | 1.29227  | 1.170556 | 1.42664  | 3.77E-07 |
| SRP9                 | 1.092072 | 0.993341 | 1.200616 | 0.06849  |
| NVL                  | 1.081409 | 0.991571 | 1.179386 | 0.07695  |
| DEGS1                | 1.230955 | 1.109448 | 1.36577  | 8.90E-05 |
| FBXO28               | 0.968062 | 0.878988 | 1.066164 | 0.509847 |
| ARF1                 | 0.856627 | 0.779963 | 0.940828 | 0.001216 |
| CNIH4                | 1.075471 | 0.987433 | 1.171358 | 0.094972 |
| ITPKB                | 0.979372 | 0.919801 | 1.042801 | 0.515039 |
| GUK1                 | 0.980456 | 0.880789 | 1.0914   | 0.718194 |
| CDC42BP <sup>A</sup> | 1.141013 | 1.08663  | 1.198118 | 1.19E-07 |
| CNIH3                | 0.918218 | 0.806282 | 1.045695 | 0.198331 |
| MBOAT2               | 1.076726 | 1.030258 | 1.125289 | 0.001022 |
| PARP1                | 1.151205 | 1.06196  | 1.24795  | 0.000626 |
| PYCR2                | 1.212824 | 1.101372 | 1.335555 | 8.74E-05 |
| LBR                  | 0.896946 | 0.842848 | 0.954515 | 0.000611 |
| WNT9A                | 0.979569 | 0.894339 | 1.072922 | 0.65671  |
| EPHX1                | 0.947875 | 0.8806   | 1.020289 | 0.154097 |
| REN                  | 1.103983 | 1.055282 | 1.154932 | 1.73E-05 |
| SOX13                | 0.939841 | 0.853037 | 1.035477 | 0.209528 |
| ETNK2                | 1.242698 | 1.107578 | 1.394301 | 0.000216 |
| PPFIA4               | 1.090579 | 1.013886 | 1.173074 | 0.019773 |
| PLEKHA6              | 1.203264 | 1.127871 | 1.283698 | 2.08E-08 |
| PTPN7                | 1.106337 | 1.011824 | 1.209677 | 0.026558 |
| SYT2                 | 1.150517 | 1.058163 | 1.250931 | 0.001023 |
| ARL8A                | 0.852877 | 0.794793 | 0.915206 | 9.77E-06 |
| GDF7                 | 0.988206 | 0.880506 | 1.109079 | 0.840301 |
| PDIA6                | 1.0258   | 0.948477 | 1.109428 | 0.52409  |
| RHOB                 | 0.877973 | 0.841184 | 0.916371 | 2.54E-09 |
| ATP6V1C2             | 0.991469 | 0.903079 | 1.088512 | 0.857293 |
| GALM                 | 1.050452 | 0.993608 | 1.110548 | 0.082908 |
| EML4                 | 1.012765 | 0.95112  | 1.078406 | 0.692194 |
| CALM2                | 1.164084 | 1.061803 | 1.276217 | 0.001204 |
| CHAC2                | 1.029853 | 0.956492 | 1.10884  | 0.435287 |
| RPS27A               | 0.882843 | 0.820405 | 0.950032 | 0.00087  |
| VPS54                | 1.033087 | 0.950426 | 1.122937 | 0.444267 |
| ASXL2                | 1.032523 | 0.964953 | 1.104824 | 0.354012 |
| ETAA1                | 1.149803 | 1.046318 | 1.263524 | 0.003721 |
| SNRPG                | 0.989472 | 0.881089 | 1.111187 | 0.858085 |
| ABHD1                | 1.30459  | 1.179243 | 1.443261 | 2.48E-07 |
| MEIS1                | 1.108255 | 1.074307 | 1.143275 | 9.44E-11 |
| CIAO1                | 1.043695 | 0.946557 | 1.1508   | 0.390876 |
| ZNF514               | 1.027671 | 0.956524 | 1.10411  | 0.455869 |
| SNRNP20 <sup>C</sup> | 1.035166 | 0.955009 | 1.122052 | 0.400638 |
| MRPS5                | 1.023704 | 0.921964 | 1.13667  | 0.660912 |
| ANKRD53              | 1.157721 | 1.031262 | 1.299688 | 0.013081 |
| TPRKB                | 1.062536 | 0.962292 | 1.173224 | 0.230245 |
| EXOC6B               | 1.165697 | 1.083106 | 1.254586 | 4.33E-05 |



|          |          |          |          |          |
|----------|----------|----------|----------|----------|
| SFXN5    | 0.981598 | 0.911332 | 1.057281 | 0.624049 |
| TEX261   | 1.13204  | 1.022344 | 1.253508 | 0.017084 |
| DQX1     | 1.255994 | 1.120715 | 1.407603 | 8.85E-05 |
| DUSP11   | 1.06812  | 0.974641 | 1.170566 | 0.15846  |
| ST6GAL2  | 1.166258 | 1.10016  | 1.236327 | 2.38E-07 |
| THNSL2   | 0.980453 | 0.895174 | 1.073857 | 0.670704 |
| RALB     | 1.155487 | 1.063989 | 1.254853 | 0.000596 |
| TMEM177  | 1.243551 | 1.138482 | 1.358317 | 1.30E-06 |
| RABL2A   | 1.143269 | 1.038673 | 1.258398 | 0.006237 |
| SLC20A1  | 1.072893 | 0.995879 | 1.155863 | 0.064127 |
| FBLN7    | 1.100894 | 0.972936 | 1.245682 | 0.127322 |
| ZC3H8    | 1.100328 | 0.986261 | 1.227587 | 0.086857 |
| LIPT1    | 0.993941 | 0.892935 | 1.106374 | 0.911503 |
| FAHD2B   | 1.277837 | 1.173842 | 1.391047 | 1.51E-08 |
| LYG1     | 1.043861 | 0.963298 | 1.131163 | 0.294868 |
| AFF3     | 1.065816 | 1.010337 | 1.124342 | 0.019438 |
| UBXN4    | 0.965562 | 0.894403 | 1.042382 | 0.369591 |
| SPOPL    | 0.925878 | 0.86438  | 0.991752 | 0.028081 |
| POLR2D   | 1.108597 | 1.011415 | 1.215116 | 0.027635 |
| AMMECR1  | 0.938312 | 0.864425 | 1.018516 | 0.128124 |
| PKP4     | 0.98149  | 0.918668 | 1.048607 | 0.579844 |
| SCRN3    | 1.142133 | 1.043512 | 1.250075 | 0.003922 |
| CDCA7    | 0.926722 | 0.884639 | 0.970807 | 0.00133  |
| DLX1     | 1.252114 | 1.158314 | 1.353509 | 1.52E-08 |
| UBR3     | 1.048795 | 0.979009 | 1.123554 | 0.175065 |
| PHOSPHO  | 1.114208 | 1.019178 | 1.218099 | 0.017425 |
| FAM171B  | 1.050853 | 0.96827  | 1.140478 | 0.234905 |
| HSPD1    | 1.038807 | 0.966504 | 1.116519 | 0.300972 |
| CCDC150  | 1.198156 | 1.061724 | 1.352119 | 0.003379 |
| PTH2R    | 0.889275 | 0.84713  | 0.933516 | 2.17E-06 |
| NBEAL1   | 1.131435 | 1.042718 | 1.227699 | 0.003036 |
| SPAG16   | 1.047523 | 0.918137 | 1.195142 | 0.49005  |
| SUMF1    | 1.001653 | 0.92077  | 1.089641 | 0.969335 |
| RHBDD1   | 1.122016 | 1.029646 | 1.222673 | 0.008628 |
| HES6     | 1.012706 | 0.961706 | 1.066412 | 0.631998 |
| ANKMY1   | 1.122263 | 1.0436   | 1.206856 | 0.001865 |
| COPS7B   | 1.054364 | 0.956288 | 1.162498 | 0.287917 |
| DIS3L2   | 1.054863 | 0.971153 | 1.145788 | 0.205481 |
| CPNE9    | 1.100503 | 1.009335 | 1.199905 | 0.029965 |
| FANCD2   | 1.089296 | 1.016607 | 1.167183 | 0.015207 |
| VGLL4    | 0.888287 | 0.822139 | 0.959758 | 0.002698 |
| RAB5A    | 0.95868  | 0.874343 | 1.051153 | 0.369105 |
| CTDSP1   | 1.024034 | 0.939184 | 1.116551 | 0.590454 |
| STK11IP  | 1.068176 | 0.983485 | 1.160159 | 0.117618 |
| GMPPA    | 1.187398 | 1.081165 | 1.30407  | 0.000328 |
| EAF1     | 1.113278 | 1.025639 | 1.208406 | 0.010315 |
| CNTN4    | 1.050847 | 0.978755 | 1.128249 | 0.171385 |
| DYNC1LI1 | 0.963553 | 0.858866 | 1.081001 | 0.526937 |
| OSBPL10  | 1.060357 | 0.987675 | 1.138388 | 0.105736 |
| SLC25A38 | 1.045772 | 0.950905 | 1.150103 | 0.356308 |
| ITGA9    | 0.900499 | 0.866782 | 0.935527 | 7.33E-08 |
| GOLGA4   | 0.946167 | 0.88818  | 1.007941 | 0.086372 |
| CTDSPL   | 1.087629 | 1.027031 | 1.151804 | 0.004081 |
| STAC     | 1.271065 | 1.201732 | 1.344398 | 5.24E-17 |
| IQSEC1   | 1.054603 | 0.99366  | 1.119284 | 0.080024 |
| CAND2    | 1.255392 | 1.160589 | 1.357939 | 1.37E-08 |
| RPL32    | 0.886194 | 0.817058 | 0.961181 | 0.003553 |
| PTPRG    | 1.042286 | 0.958216 | 1.133733 | 0.334424 |

|          |          |          |          |          |
|----------|----------|----------|----------|----------|
| SHQ1     | 1.114681 | 1.03295  | 1.202879 | 0.0052   |
| SLC25A26 | 0.976608 | 0.874058 | 1.091191 | 0.67582  |
| UBA3     | 1.071217 | 0.974558 | 1.177463 | 0.153913 |
| ARL6IP5  | 1.129353 | 1.032254 | 1.235585 | 0.008    |
| TMF1     | 0.971097 | 0.90358  | 1.043658 | 0.425036 |
| LRIG1    | 1.087856 | 1.02119  | 1.158875 | 0.009059 |
| LIMD1    | 1.001707 | 0.939363 | 1.068189 | 0.95851  |
| ZNF660   | 1.002113 | 0.932547 | 1.076869 | 0.954135 |
| NFKBIZ   | 1.027312 | 0.963365 | 1.095505 | 0.411219 |
| MYH15    | 1.053197 | 0.929264 | 1.193659 | 0.417117 |
| PHLDB2   | 1.179085 | 1.05101  | 1.322767 | 0.004985 |
| ABHD10   | 1.063148 | 0.976725 | 1.157218 | 0.156904 |
| PLA1A    | 1.152835 | 0.996857 | 1.333217 | 0.055171 |
| RABL3    | 1.01871  | 0.928669 | 1.117483 | 0.694604 |
| ADPRH    | 1.053025 | 0.980085 | 1.131394 | 0.158327 |
| ATG3     | 1.066845 | 0.955368 | 1.191329 | 0.250512 |
| NR1I2    | 1.117505 | 1.02781  | 1.215027 | 0.009254 |
| SRPRB    | 1.052335 | 0.970609 | 1.140943 | 0.216189 |
| AGTR1    | 1.135094 | 1.049308 | 1.227894 | 0.001576 |
| MED12L   | 1.141011 | 1.102114 | 1.181281 | 9.04E-14 |
| EIF2A    | 0.838661 | 0.771766 | 0.911354 | 3.35E-05 |
| OSBPL11  | 0.992805 | 0.92108  | 1.070115 | 0.850289 |
| TRPC1    | 1.227045 | 1.138245 | 1.322772 | 9.38E-08 |
| LPP      | 1.068834 | 0.992427 | 1.151124 | 0.078561 |
| TMEM44   | 0.9434   | 0.885712 | 1.004846 | 0.070326 |
| AMT      | 1.222417 | 1.059327 | 1.410616 | 0.005981 |
| TCTA     | 1.140949 | 1.030837 | 1.262823 | 0.010881 |
| UCN2     | 0.90541  | 0.825303 | 0.993292 | 0.035522 |
| STXBP5L  | 1.128441 | 1.024783 | 1.242585 | 0.013975 |
| EAF2     | 1.092231 | 1.024507 | 1.164432 | 0.006907 |
| ILDR1    | 1.083192 | 0.969012 | 1.210825 | 0.159699 |
| TM4SF19  | 1.00628  | 0.870336 | 1.163458 | 0.932629 |
| EIF2B5   | 1.197109 | 1.076492 | 1.331242 | 0.000899 |
| DGKQ     | 1.13454  | 1.056475 | 1.218373 | 0.00052  |
| FIP1L1   | 1.002997 | 0.905304 | 1.111232 | 0.954363 |
| SLC26A1  | 1.059109 | 0.988799 | 1.134419 | 0.101302 |
| LYAR     | 1.041658 | 0.960493 | 1.129681 | 0.324092 |
| ATP10D   | 0.976703 | 0.919449 | 1.037522 | 0.444374 |
| OCIAD2   | 1.015001 | 0.949722 | 1.084767 | 0.660653 |
| SLC10A4  | 1.089699 | 0.989527 | 1.200011 | 0.080814 |
| SCD5     | 1.196606 | 1.124736 | 1.273067 | 1.35E-08 |
| PLAC8    | 1.081802 | 1.010631 | 1.157986 | 0.023542 |
| ENOPH1   | 1.199808 | 1.072347 | 1.342421 | 0.001478 |
| KLHL8    | 1.011169 | 0.930969 | 1.098277 | 0.792219 |
| SNCA     | 1.114142 | 1.065992 | 1.164467 | 1.63E-06 |
| CAMK2D   | 1.119162 | 1.06202  | 1.179378 | 2.55E-05 |
| CISD2    | 1.089987 | 0.986995 | 1.203726 | 0.088853 |
| DDIT4L   | 0.962442 | 0.916581 | 1.010597 | 0.124347 |
| TIFA     | 1.096719 | 1.019828 | 1.179408 | 0.012797 |
| SPATA5   | 1.099659 | 1.028635 | 1.175587 | 0.005292 |
| CCNA2    | 1.113717 | 1.049316 | 1.182072 | 0.000394 |
| METTL14  | 1.015568 | 0.927827 | 1.111605 | 0.737565 |
| USP53    | 0.891621 | 0.829697 | 0.958167 | 0.001787 |
| SETD7    | 1.012462 | 0.949265 | 1.079867 | 0.706453 |
| NAF1     | 1.031342 | 0.918063 | 1.158598 | 0.603161 |
| SFRP2    | 0.968591 | 0.865937 | 1.083413 | 0.576623 |
| RPS3A    | 0.890066 | 0.818316 | 0.968107 | 0.006611 |
| RNF175   | 0.989084 | 0.92057  | 1.062696 | 0.764417 |

|          |          |          |          |          |
|----------|----------|----------|----------|----------|
| PDGFC    | 0.864684 | 0.828469 | 0.902483 | 2.73E-11 |
| CBR4     | 1.06076  | 0.98259  | 1.145149 | 0.130976 |
| CYP4V2   | 1.153644 | 1.080771 | 1.231431 | 1.76E-05 |
| ROPN1L   | 1.096035 | 1.018847 | 1.179069 | 0.013851 |
| NDUFS6   | 1.076543 | 0.992446 | 1.167765 | 0.075526 |
| NKD2     | 0.97866  | 0.927283 | 1.032883 | 0.433031 |
| SRD5A1   | 1.04366  | 0.947726 | 1.149305 | 0.385046 |
| MYO10    | 1.004659 | 0.875935 | 1.1523   | 0.947021 |
| RPL37    | 0.926747 | 0.868145 | 0.989305 | 0.022455 |
| SKP2     | 1.013795 | 0.922129 | 1.114573 | 0.77691  |
| OSMR     | 0.958868 | 0.877413 | 1.047885 | 0.353765 |
| PLK2     | 1.005996 | 0.95581  | 1.058817 | 0.818903 |
| GZMA     | 1.06825  | 1.018789 | 1.120111 | 0.006342 |
| PIK3R1   | 0.929939 | 0.874197 | 0.989235 | 0.021271 |
| LHFPL2   | 0.892858 | 0.843188 | 0.945453 | 0.000104 |
| SSBP2    | 1.041655 | 0.97923  | 1.108061 | 0.195561 |
| IQGAP2   | 1.014861 | 0.957769 | 1.075357 | 0.617528 |
| CRHBP    | 0.976338 | 0.923388 | 1.032325 | 0.399952 |
| RASA1    | 1.018237 | 0.952975 | 1.08797  | 0.592814 |
| LIX1     | 1.083392 | 0.941655 | 1.246464 | 0.262871 |
| GIN1     | 1.10907  | 0.978581 | 1.25696  | 0.10503  |
| PAM      | 0.886839 | 0.837797 | 0.938752 | 3.51E-05 |
| BDP1     | 0.941244 | 0.873015 | 1.014806 | 0.11476  |
| GTF2H2   | 1.047801 | 0.939629 | 1.168425 | 0.400971 |
| SLC30A5  | 1.067294 | 0.96081  | 1.18558  | 0.224573 |
| BTF3     | 0.863517 | 0.788999 | 0.945072 | 0.001438 |
| FBXL17   | 0.986576 | 0.903226 | 1.077618 | 0.764105 |
| SPATA9   | 1.119926 | 1.008777 | 1.243323 | 0.033685 |
| TNFAIP8  | 0.941548 | 0.87495  | 1.013215 | 0.107571 |
| FEM1C    | 0.900474 | 0.845709 | 0.958786 | 0.001058 |
| COMMD10  | 1.03889  | 0.966927 | 1.116208 | 0.297557 |
| ATG12    | 1.016644 | 0.919957 | 1.123492 | 0.746139 |
| MEGF10   | 1.016913 | 0.955118 | 1.082706 | 0.600046 |
| YIPF5    | 1.036483 | 0.942145 | 1.140267 | 0.461762 |
| ARHGAP20 | 0.982488 | 0.924645 | 1.04395  | 0.568229 |
| DDX46    | 1.013265 | 0.911108 | 1.126876 | 0.807979 |
| TIMD4    | 0.923899 | 0.852745 | 1.00099  | 0.052897 |
| RNF145   | 1.018205 | 0.93981  | 1.10314  | 0.658963 |
| FBXO38   | 0.951395 | 0.889404 | 1.017707 | 0.14723  |
| PCYOX1L  | 1.131424 | 1.0575   | 1.210515 | 0.000341 |
| TNIP1    | 0.877776 | 0.810446 | 0.9507   | 0.001367 |
| G3BP1    | 1.054062 | 0.97565  | 1.138777 | 0.181895 |
| ZNF300   | 1.145381 | 1.059698 | 1.237993 | 0.000623 |
| N4BP3    | 1.031199 | 0.984285 | 1.08035  | 0.195939 |
| NHP2     | 1.111828 | 1.026126 | 1.204688 | 0.009594 |
| RMND5B   | 1.204182 | 1.121692 | 1.292739 | 2.87E-07 |
| KCNMB1   | 1.231005 | 1.126023 | 1.345774 | 4.88E-06 |
| FAM50B   | 1.005113 | 0.924137 | 1.093186 | 0.905264 |
| MYLK4    | 1.090197 | 1.020647 | 1.164488 | 0.010241 |
| TBC1D7   | 1.055978 | 0.957603 | 1.164458 | 0.274976 |
| FARS2    | 1.073125 | 0.995637 | 1.156643 | 0.064947 |
| GFOD1    | 0.969256 | 0.912794 | 1.029212 | 0.307868 |
| CDKAL1   | 1.005202 | 0.940335 | 1.074543 | 0.878845 |
| PSD2     | 1.087675 | 0.954483 | 1.239453 | 0.207314 |
| LRRTM2   | 1.034081 | 0.938213 | 1.139745 | 0.499589 |
| ZMAT2    | 1.111615 | 0.997402 | 1.238906 | 0.055757 |
| GFRA3    | 0.859284 | 0.758776 | 0.973106 | 0.016871 |
| KLHL3    | 1.26228  | 1.158478 | 1.375384 | 1.04E-07 |

|          |          |          |          |          |
|----------|----------|----------|----------|----------|
| TRIM7    | 1.318964 | 1.195735 | 1.454894 | 3.17E-08 |
| TRIM41   | 1.100725 | 0.989183 | 1.224845 | 0.07833  |
| HIGD2A   | 0.99071  | 0.910724 | 1.077721 | 0.827969 |
| FAM193B  | 0.962762 | 0.894608 | 1.036109 | 0.311042 |
| PLA2G7   | 1.089233 | 0.993432 | 1.194273 | 0.068808 |
| TNFRSF21 | 0.966505 | 0.923438 | 1.011581 | 0.142951 |
| RNF44    | 0.861613 | 0.790256 | 0.939414 | 0.000733 |
| DOK3     | 1.036656 | 0.962467 | 1.116563 | 0.342    |
| ABT1     | 1.111189 | 1.000642 | 1.233948 | 0.048612 |
| DAAM2    | 1.164428 | 1.038205 | 1.305997 | 0.009311 |
| PRIM2    | 1.073049 | 0.993134 | 1.159395 | 0.074182 |
| FGD2     | 1.052042 | 1.004967 | 1.101322 | 0.029849 |
| SCUBE3   | 1.008641 | 0.940456 | 1.08177  | 0.809607 |
| ANO7     | 0.977423 | 0.929292 | 1.028047 | 0.375439 |
| CRIP3    | 1.216346 | 1.089454 | 1.358019 | 0.000494 |
| TCTE1    | 1.169497 | 1.063864 | 1.285618 | 0.001188 |
| RPL7L1   | 1.01042  | 0.932805 | 1.094493 | 0.799333 |
| NFKBIE   | 0.982343 | 0.919177 | 1.049849 | 0.599324 |
| TPBG     | 1.099667 | 1.036811 | 1.166334 | 0.001558 |
| IRAK1BP1 | 1.091519 | 0.994611 | 1.19787  | 0.064884 |
| PHIP     | 0.971619 | 0.909453 | 1.038034 | 0.393411 |
| PNRC1    | 0.869085 | 0.808269 | 0.934477 | 0.00015  |
| PM20D2   | 0.983222 | 0.916352 | 1.054972 | 0.637764 |
| RARS2    | 1.035472 | 0.94874  | 1.130133 | 0.43481  |
| SCML4    | 1.031128 | 0.95755  | 1.11036  | 0.417052 |
| RNF217   | 1.02967  | 0.974856 | 1.087565 | 0.294835 |
| ARHGAP18 | 1.117271 | 1.043684 | 1.196047 | 0.001423 |
| SHPRH    | 1.01836  | 0.950705 | 1.090831 | 0.60396  |
| AIG1     | 1.083971 | 1.017068 | 1.155274 | 0.013115 |
| DYNLT1   | 0.966266 | 0.890415 | 1.048579 | 0.410672 |
| TIAM2    | 1.071795 | 0.977835 | 1.174783 | 0.138568 |
| TMEM181  | 0.945865 | 0.887382 | 1.008202 | 0.087432 |
| PNLDC1   | 1.023771 | 0.930469 | 1.12643  | 0.62991  |
| WTAP     | 0.988997 | 0.906889 | 1.078538 | 0.802431 |
| ZMYM4    | 1.001092 | 0.934907 | 1.071962 | 0.975052 |
| VWDE     | 1.155204 | 1.077825 | 1.238138 | 4.53E-05 |
| GNA12    | 1.000422 | 0.933469 | 1.072177 | 0.990479 |
| SDK1     | 1.265421 | 1.151627 | 1.39046  | 9.76E-07 |
| WASH2P   | 0.997653 | 0.903629 | 1.101461 | 0.962896 |
| RBAK     | 1.031529 | 0.951841 | 1.117888 | 0.449204 |
| CREB5    | 1.044944 | 0.982102 | 1.111807 | 0.164751 |
| CDCA5    | 1.105504 | 1.034057 | 1.181887 | 0.003256 |
| IGFBP3   | 1.081373 | 0.977192 | 1.19666  | 0.130133 |
| PURB     | 0.978937 | 0.902694 | 1.06162  | 0.606847 |
| MDH2     | 0.999392 | 0.912377 | 1.094706 | 0.989565 |
| POMZP3   | 0.915843 | 0.839228 | 0.999451 | 0.048578 |
| CCT6A    | 0.985156 | 0.899567 | 1.078889 | 0.747066 |
| PSPH     | 1.04316  | 0.965    | 1.127651 | 0.28761  |
| ZNF92    | 0.997713 | 0.931108 | 1.069084 | 0.94822  |
| ATXN7L1  | 0.997841 | 0.919637 | 1.082696 | 0.958613 |
| TMEM168  | 1.063516 | 0.98566  | 1.147522 | 0.112378 |
| ASB15    | 1.001706 | 0.910218 | 1.10239  | 0.972172 |
| SLC12A9  | 1.037355 | 0.977769 | 1.100572 | 0.224333 |
| GIGYF1   | 1.019298 | 0.953005 | 1.090203 | 0.577478 |
| TRIM4    | 1.0107   | 0.925363 | 1.103906 | 0.813064 |
| MEPCE    | 0.946672 | 0.867504 | 1.033064 | 0.218724 |
| TMEM209  | 1.236791 | 1.13168  | 1.351666 | 2.74E-06 |
| AGBL3    | 1.034523 | 0.896114 | 1.19431  | 0.643252 |

|          |          |          |          |          |
|----------|----------|----------|----------|----------|
| ZC3HAV1  | 0.954666 | 0.903597 | 1.008622 | 0.098147 |
| TMEM140  | 0.965067 | 0.907299 | 1.026514 | 0.25888  |
| TLK2     | 0.90885  | 0.844196 | 0.978456 | 0.011136 |
| EPHA1    | 0.990384 | 0.930467 | 1.054159 | 0.761537 |
| NOM1     | 1.08705  | 1.000253 | 1.18138  | 0.049308 |
| NCAPG2   | 1.02833  | 0.963335 | 1.097709 | 0.40168  |
| RAB19    | 1.055345 | 0.981425 | 1.134832 | 0.145971 |
| LUC7L2   | 0.947527 | 0.879134 | 1.02124  | 0.158505 |
| SH3KBP1  | 0.909501 | 0.838425 | 0.986604 | 0.022324 |
| LANCL3   | 1.216918 | 1.113251 | 1.33024  | 1.55E-05 |
| CASK     | 0.995364 | 0.90541  | 1.094255 | 0.9234   |
| SPIN2A   | 0.977247 | 0.890124 | 1.072897 | 0.629027 |
| MSN      | 0.922631 | 0.849293 | 1.002302 | 0.056707 |
| HDAC8    | 1.028029 | 0.939721 | 1.124636 | 0.546347 |
| SLC16A2  | 0.966232 | 0.866752 | 1.07713  | 0.535482 |
| ZNF182   | 0.998787 | 0.913464 | 1.092079 | 0.978746 |
| CHST7    | 1.008785 | 0.942711 | 1.079491 | 0.800214 |
| NDUFB11  | 0.963323 | 0.887507 | 1.045616 | 0.371623 |
| ZNF41    | 1.068322 | 0.984068 | 1.15979  | 0.114843 |
| RAB41    | 1.095394 | 0.928874 | 1.291768 | 0.278815 |
| ZMYM3    | 0.984602 | 0.920583 | 1.053073 | 0.650994 |
| TAF1     | 1.023043 | 0.95643  | 1.094296 | 0.507217 |
| GPR174   | 0.963526 | 0.916439 | 1.013033 | 0.146102 |
| NONO     | 0.937573 | 0.847568 | 1.037135 | 0.210622 |
| CCDC120  | 0.960897 | 0.878191 | 1.051391 | 0.385041 |
| LPAR4    | 0.932823 | 0.867436 | 1.003139 | 0.060733 |
| EBP      | 1.300804 | 1.173954 | 1.44136  | 5.07E-07 |
| OGT      | 0.983544 | 0.929073 | 1.041208 | 0.568128 |
| SNX12    | 0.998065 | 0.916668 | 1.086689 | 0.964401 |
| ITGB1BP2 | 1.001808 | 0.934374 | 1.074107 | 0.959488 |
| IL2RG    | 1.011755 | 0.941817 | 1.086886 | 0.749147 |
| ZNF711   | 1.031619 | 0.996626 | 1.067841 | 0.077062 |
| DIAPH2   | 0.950858 | 0.892446 | 1.013094 | 0.119282 |
| NXF3     | 0.997457 | 0.954347 | 1.042514 | 0.910065 |
| PRPS1    | 1.140203 | 1.033731 | 1.257642 | 0.00871  |
| DOCK11   | 0.965355 | 0.907572 | 1.026819 | 0.262885 |
| IGSF1    | 0.97529  | 0.920564 | 1.03327  | 0.395789 |
| GPC3     | 1.221789 | 1.144494 | 1.304304 | 1.88E-09 |
| RBMX     | 0.939412 | 0.855236 | 1.031872 | 0.191922 |
| MCPH1    | 1.030009 | 0.931214 | 1.139285 | 0.565476 |
| MFHAS1   | 1.135438 | 1.064385 | 1.211235 | 0.000117 |
| FBXO25   | 1.126467 | 1.021692 | 1.241988 | 0.016812 |
| NSDHL    | 1.075791 | 0.95474  | 1.212189 | 0.230332 |
| ZNF185   | 0.968604 | 0.927631 | 1.011388 | 0.148042 |
| CETN2    | 1.133915 | 1.040905 | 1.235236 | 0.004001 |
| RPL10    | 0.844558 | 0.780984 | 0.913306 | 2.33E-05 |
| CSGALNA  | 0.985312 | 0.93207  | 1.041595 | 0.601608 |
| ATP6V1B2 | 0.926429 | 0.864191 | 0.993149 | 0.031262 |
| CCDC25   | 1.245235 | 1.137868 | 1.362732 | 1.87E-06 |
| HMBOX1   | 0.969781 | 0.908112 | 1.035637 | 0.359995 |
| CHRNA6   | 0.845275 | 0.762111 | 0.937514 | 0.001468 |
| GNRH1    | 1.015606 | 0.944625 | 1.09192  | 0.675284 |
| BIN3     | 0.984393 | 0.918542 | 1.054965 | 0.656116 |
| DOK2     | 1.091425 | 1.020604 | 1.167162 | 0.010596 |
| SLC25A37 | 1.022081 | 0.972352 | 1.074353 | 0.390769 |
| CHMP7    | 1.030579 | 0.966988 | 1.098353 | 0.353969 |
| DOCK5    | 0.998751 | 0.942252 | 1.058638 | 0.966453 |
| STAR     | 0.902645 | 0.843543 | 0.965888 | 0.003032 |

|          |          |          |          |          |
|----------|----------|----------|----------|----------|
| ERLIN2   | 1.056942 | 0.974838 | 1.14596  | 0.179502 |
| ST18     | 0.75084  | 0.69773  | 0.807993 | 1.92E-14 |
| RGS20    | 0.965644 | 0.892213 | 1.045118 | 0.386289 |
| TACC1    | 1.010864 | 0.934766 | 1.093158 | 0.786695 |
| GOLGA7   | 1.116014 | 0.993005 | 1.25426  | 0.065452 |
| GINS4    | 1.073032 | 0.988288 | 1.165042 | 0.093096 |
| DNAJC5B  | 1.059634 | 0.998982 | 1.123969 | 0.054092 |
| ADHFE1   | 1.223799 | 1.084932 | 1.38044  | 0.001014 |
| MRPS28   | 1.010224 | 0.909943 | 1.121557 | 0.848755 |
| LACTB2   | 1.213683 | 1.099298 | 1.33997  | 0.000126 |
| TERF1    | 1.152532 | 1.049162 | 1.266087 | 0.003067 |
| RPL7     | 0.867267 | 0.799098 | 0.941251 | 0.000651 |
| ATP6V0D2 | 0.979975 | 0.820178 | 1.170906 | 0.823751 |
| MTDH     | 0.961662 | 0.88253  | 1.047889 | 0.372247 |
| LRP12    | 0.924504 | 0.873595 | 0.97838  | 0.006602 |
| EBAG9    | 1.091086 | 0.970777 | 1.226306 | 0.143627 |
| POLR2K   | 1.178266 | 1.055261 | 1.315608 | 0.003544 |
| EIF3H    | 0.849322 | 0.774625 | 0.931223 | 0.000507 |
| UTP23    | 1.111421 | 1.008768 | 1.22452  | 0.032636 |
| NDUFB9   | 1.028789 | 0.92297  | 1.14674  | 0.608298 |
| TATDN1   | 0.934499 | 0.823238 | 1.060797 | 0.294904 |
| FAM83A   | 1.073381 | 1.015618 | 1.13443  | 0.012106 |
| GSDMC    | 0.910509 | 0.823042 | 1.007271 | 0.068854 |
| ZNF7     | 1.137767 | 1.031046 | 1.255534 | 0.010218 |
| SLC39A4  | 1.118811 | 1.025567 | 1.220532 | 0.011453 |
| VLDLR    | 0.949942 | 0.909008 | 0.992719 | 0.022304 |
| AK3      | 1.018985 | 0.928463 | 1.118333 | 0.691942 |
| UHRF2    | 0.978737 | 0.912096 | 1.050248 | 0.550276 |
| NFIB     | 1.192496 | 1.085613 | 1.309902 | 0.000238 |
| PLIN2    | 0.823764 | 0.78428  | 0.865237 | 1.03E-14 |
| HAUS6    | 0.974387 | 0.900525 | 1.054308 | 0.518864 |
| CDKN2B   | 1.0577   | 0.983473 | 1.137529 | 0.13077  |
| CDKN2A   | 1.009405 | 0.951213 | 1.071157 | 0.757334 |
| IFNK     | 0.949477 | 0.904658 | 0.996516 | 0.035603 |
| ZCCHC7   | 0.995958 | 0.927405 | 1.069578 | 0.91136  |
| FBXO10   | 1.118933 | 0.999984 | 1.252031 | 0.050032 |
| SIGMAR1  | 1.138235 | 1.07376  | 1.20658  | 1.35E-05 |
| CBWD5    | 0.931604 | 0.831077 | 1.044291 | 0.223958 |
| CEP78    | 1.207008 | 1.100397 | 1.323947 | 6.67E-05 |
| AUH      | 0.977626 | 0.918243 | 1.04085  | 0.479121 |
| ZNF462   | 1.2546   | 1.145581 | 1.373995 | 1.01E-06 |
| UGCG     | 1.009655 | 0.957646 | 1.064489 | 0.721755 |
| SNX30    | 0.910501 | 0.850005 | 0.975303 | 0.007521 |
| STOM     | 0.980474 | 0.922308 | 1.042308 | 0.527401 |
| GSN      | 1.03259  | 0.976038 | 1.092418 | 0.264433 |
| MRRF     | 0.940371 | 0.845479 | 1.045914 | 0.25729  |
| NR6A1    | 1.060835 | 1.005881 | 1.118791 | 0.029553 |
| CRB2     | 1.021485 | 0.949205 | 1.09927  | 0.57022  |
| ALAD     | 1.145022 | 1.062903 | 1.233485 | 0.000362 |
| WDR31    | 1.077883 | 0.984523 | 1.180097 | 0.104692 |
| POLE3    | 1.095856 | 0.999769 | 1.201178 | 0.050579 |
| SURF4    | 0.931383 | 0.862914 | 1.005285 | 0.068051 |
| GBGT1    | 1.063719 | 0.997265 | 1.134601 | 0.060553 |
| SURF1    | 1.092354 | 0.964265 | 1.237458 | 0.165096 |
| SURF2    | 1.094409 | 0.994366 | 1.204519 | 0.065118 |
| SURF6    | 1.104148 | 1.003352 | 1.21507  | 0.042511 |
| MED22    | 1.046479 | 0.963949 | 1.136073 | 0.278391 |
| REXO4    | 1.025845 | 0.936856 | 1.123286 | 0.581541 |

|          |          |          |          |          |
|----------|----------|----------|----------|----------|
| RPL7A    | 0.851945 | 0.781405 | 0.928853 | 0.000279 |
| GTF3C5   | 1.1167   | 1.029726 | 1.21102  | 0.00763  |
| ASB6     | 1.045319 | 0.959263 | 1.139096 | 0.311946 |
| PTGES2   | 1.15144  | 1.045714 | 1.267855 | 0.00411  |
| CIZ1     | 0.93145  | 0.839055 | 1.034019 | 0.182755 |
| SLC25A25 | 0.91161  | 0.844204 | 0.984398 | 0.018217 |
| SH3GLB2  | 1.190757 | 1.096155 | 1.293523 | 3.57E-05 |
| PTGES    | 1.091116 | 1.048038 | 1.135965 | 2.21E-05 |
| LCN2     | 1.007759 | 0.979167 | 1.037187 | 0.598667 |
| LRSAM1   | 0.998091 | 0.918728 | 1.08431  | 0.963954 |
| GPR107   | 0.959214 | 0.891154 | 1.032472 | 0.267454 |
| IDI2     | 0.936168 | 0.867168 | 1.010658 | 0.091302 |
| INPP5E   | 1.044234 | 0.951761 | 1.14569  | 0.360243 |
| SEC16A   | 0.976942 | 0.910191 | 1.048588 | 0.518256 |
| NOTCH1   | 1.078382 | 1.014397 | 1.146403 | 0.015606 |
| NACC2    | 1.02127  | 0.970846 | 1.074313 | 0.415247 |
| USP6NL   | 1.054498 | 0.975921 | 1.139401 | 0.179251 |
| COMMD3   | 1.256673 | 1.179233 | 1.339199 | 1.92E-12 |
| MSRB2    | 1.123498 | 1.045663 | 1.207127 | 0.001478 |
| PDSS1    | 1.058277 | 0.976794 | 1.146557 | 0.165867 |
| FAM171A1 | 0.886888 | 0.844254 | 0.931676 | 1.79E-06 |
| RSU1     | 1.137179 | 1.05437  | 1.226492 | 0.000861 |
| ST8SIA6  | 1.123622 | 1.077097 | 1.172157 | 6.58E-08 |
| PARD3    | 0.940678 | 0.866166 | 1.0216   | 0.146383 |
| ZEB1     | 0.998306 | 0.947242 | 1.052124 | 0.949546 |
| NRBF2    | 1.026753 | 0.938309 | 1.123533 | 0.565654 |
| POLR3A   | 1.097551 | 1.018734 | 1.182467 | 0.014361 |
| HERC4    | 1.033283 | 0.962428 | 1.109354 | 0.366344 |
| CAMK2G   | 1.082147 | 0.999536 | 1.171586 | 0.051355 |
| GLUD1    | 0.956689 | 0.88082  | 1.039094 | 0.293589 |
| ANKRD1   | 1.231636 | 1.019679 | 1.487652 | 0.030602 |
| HTR7     | 1.098097 | 1.047573 | 1.151057 | 9.87E-05 |
| RPP30    | 1.172208 | 1.057529 | 1.299324 | 0.002488 |
| ADD3     | 1.016359 | 0.958113 | 1.078145 | 0.589961 |
| DNAJB12  | 1.043037 | 0.947166 | 1.148611 | 0.391695 |
| EIF4EBP2 | 1.033145 | 0.942295 | 1.132754 | 0.487475 |
| TCF7L2   | 0.874957 | 0.820206 | 0.933362 | 5.09E-05 |
| MKI67    | 1.087842 | 1.03352  | 1.14502  | 0.001275 |
| LRRC27   | 1.150814 | 1.02459  | 1.292588 | 0.017798 |
| MTG1     | 1.207158 | 1.083248 | 1.345242 | 0.000657 |
| NKX6-2   | 1.011831 | 0.876116 | 1.168569 | 0.872827 |
| PAOX     | 1.364163 | 1.182924 | 1.573171 | 1.96E-05 |
| GSTO1    | 1.002811 | 0.911203 | 1.103628 | 0.954204 |
| TAF5     | 1.199061 | 1.09622  | 1.311549 | 7.25E-05 |
| PPRC1    | 1.028048 | 0.952852 | 1.109179 | 0.475367 |
| ITPRIP   | 1.003237 | 0.9408   | 1.069818 | 0.921469 |
| CNNM2    | 1.024148 | 0.951306 | 1.102568 | 0.526171 |
| PDCD11   | 1.057809 | 0.984758 | 1.13628  | 0.123735 |
| RGS10    | 1.040318 | 0.98245  | 1.101594 | 0.175861 |
| BTBD10   | 1.082802 | 0.994627 | 1.178793 | 0.066409 |
| ADM      | 0.977318 | 0.938474 | 1.017771 | 0.267546 |
| GAS2     | 1.134229 | 1.010126 | 1.27358  | 0.033141 |
| LIN7C    | 0.994915 | 0.926392 | 1.068508 | 0.888655 |
| IMMP1L   | 1.072516 | 0.976476 | 1.178001 | 0.14357  |
| TUT1     | 1.091128 | 0.99564  | 1.195774 | 0.061978 |
| SCGB1A1  | 1.078369 | 0.971089 | 1.197502 | 0.158176 |
| HSD17B12 | 0.992139 | 0.90976  | 1.081977 | 0.858372 |
| APIP     | 1.102555 | 0.992404 | 1.224933 | 0.069067 |

|          |          |          |          |          |
|----------|----------|----------|----------|----------|
| DGKZ     | 0.978116 | 0.905879 | 1.056115 | 0.57191  |
| EIF3M    | 0.96283  | 0.864647 | 1.072163 | 0.490043 |
| TNKS1BP1 | 0.862879 | 0.809052 | 0.920288 | 7.20E-06 |
| SERPING1 | 1.02872  | 0.983812 | 1.075678 | 0.213743 |
| SSRP1    | 1.049404 | 0.960528 | 1.146502 | 0.285509 |
| SLC43A1  | 1.00905  | 0.937719 | 1.085808 | 0.809667 |
| PTPRJ    | 0.990934 | 0.943836 | 1.040382 | 0.713931 |
| ARFGAP2  | 0.941103 | 0.868131 | 1.020207 | 0.140446 |
| CCDC81   | 1.178469 | 1.009347 | 1.375929 | 0.037739 |
| SESN3    | 0.975296 | 0.928099 | 1.024893 | 0.322954 |
| ENDOD1   | 1.056325 | 0.997426 | 1.118702 | 0.061219 |
| CCDC82   | 0.95164  | 0.880016 | 1.029093 | 0.214375 |
| KLHL35   | 0.98707  | 0.910615 | 1.069943 | 0.7517   |
| SERPINH1 | 1.081912 | 1.019225 | 1.148456 | 0.009731 |
| CAPN5    | 1.388748 | 1.278992 | 1.507922 | 5.37E-15 |
| INTS4    | 1.003275 | 0.928314 | 1.08429  | 0.934223 |
| PAK1     | 1.105631 | 1.038212 | 1.177428 | 0.001759 |
| RPS3     | 0.859329 | 0.790364 | 0.934312 | 0.000383 |
| ZC3H12C  | 1.141164 | 1.088713 | 1.196143 | 3.79E-08 |
| TTC12    | 1.145662 | 1.058196 | 1.240358 | 0.000791 |
| NCAM1    | 1.088856 | 1.047785 | 1.131537 | 1.43E-05 |
| NPAT     | 1.034548 | 0.970011 | 1.103379 | 0.301381 |
| ATM      | 1.031957 | 0.978325 | 1.088529 | 0.248004 |
| AASDHPP  | 1.15358  | 1.040615 | 1.278809 | 0.006586 |
| GLB1L2   | 1.141149 | 1.02781  | 1.266986 | 0.013364 |
| P4HA3    | 1.15178  | 0.97342  | 1.362821 | 0.099735 |
| ST14     | 1.10051  | 1.04724  | 1.15649  | 0.000155 |
| HYOU1    | 1.006545 | 0.942665 | 1.074754 | 0.84539  |
| MTA2     | 0.982012 | 0.90392  | 1.06685  | 0.66767  |
| TMEM138  | 1.144939 | 1.031535 | 1.270811 | 0.010979 |
| FADS1    | 1.208838 | 1.129551 | 1.293691 | 4.27E-08 |
| ROM1     | 1.063445 | 0.934964 | 1.209582 | 0.349095 |
| EML3     | 1.026628 | 0.944496 | 1.115902 | 0.536763 |
| INCENP   | 1.080785 | 1.009667 | 1.156913 | 0.025288 |
| ZP1      | 1.017787 | 0.920521 | 1.125331 | 0.730835 |
| MS4A3    | 0.930654 | 0.900095 | 0.962251 | 2.45E-05 |
| PLCH2    | 1.040504 | 0.945655 | 1.144867 | 0.415546 |
| MS4A2    | 0.80769  | 0.754716 | 0.864381 | 6.79E-10 |
| B3GAT3   | 1.130294 | 1.023699 | 1.247988 | 0.015375 |
| EI24     | 1.168607 | 1.068694 | 1.277861 | 0.000633 |
| CCDC15   | 1.144731 | 1.063347 | 1.232344 | 0.000328 |
| CHEK1    | 1.075762 | 0.992291 | 1.166255 | 0.076367 |
| FEZ1     | 1.255887 | 1.173343 | 1.344238 | 5.08E-11 |
| ESAM     | 0.972573 | 0.926325 | 1.021129 | 0.263228 |
| KIRREL3  | 1.106398 | 1.041033 | 1.175867 | 0.001137 |
| MPZL2    | 1.320774 | 1.212452 | 1.438774 | 1.86E-10 |
| SIDT2    | 1.005128 | 0.936583 | 1.078689 | 0.887137 |
| TMEM25   | 1.06992  | 0.989747 | 1.156588 | 0.089013 |
| TAGLN    | 1.01206  | 0.947518 | 1.080997 | 0.721431 |
| DUSP15   | 1.000595 | 0.887052 | 1.128672 | 0.992276 |
| COMMD7   | 1.271726 | 1.151478 | 1.404532 | 2.10E-06 |
| DSN1     | 1.147793 | 1.050917 | 1.253599 | 0.002185 |
| LSM14B   | 0.913156 | 0.856422 | 0.973649 | 0.005504 |
| YTHDF1   | 1.012055 | 0.92617  | 1.105903 | 0.791138 |
| CABLES2  | 1.227875 | 1.121133 | 1.344779 | 9.68E-06 |
| GPHA2    | 0.98607  | 0.918845 | 1.058213 | 0.696993 |
| TRPT1    | 1.081356 | 0.953073 | 1.226905 | 0.22476  |
| NUDT22   | 1.181098 | 1.075001 | 1.297667 | 0.000528 |



|          |          |          |          |          |
|----------|----------|----------|----------|----------|
| FERMT3   | 1.072662 | 0.977793 | 1.176734 | 0.137638 |
| PLCB3    | 1.002268 | 0.933837 | 1.075713 | 0.949941 |
| MRPL49   | 1.058775 | 0.955685 | 1.172985 | 0.274511 |
| FAU      | 0.924751 | 0.835767 | 1.023209 | 0.129648 |
| TM7SF2   | 1.09827  | 1.012996 | 1.190723 | 0.023021 |
| TBX6     | 0.948269 | 0.863739 | 1.041072 | 0.264843 |
| PPP4C    | 0.979869 | 0.888374 | 1.080786 | 0.684287 |
| ALDOA    | 1.005446 | 0.920004 | 1.098822 | 0.904597 |
| DOC2A    | 0.87222  | 0.792145 | 0.96039  | 0.005393 |
| HIRIP3   | 1.24084  | 1.136199 | 1.355119 | 1.58E-06 |
| TAOK2    | 1.033291 | 0.948671 | 1.125459 | 0.452519 |
| TMEM219  | 1.052137 | 0.941287 | 1.17604  | 0.370928 |
| HMGA2    | 1.239944 | 1.168289 | 1.315994 | 1.43E-12 |
| CNKSR2   | 0.882724 | 0.7821   | 0.996295 | 0.043376 |
| KLRF1    | 1.046029 | 0.983972 | 1.111999 | 0.149257 |
| MKX      | 1.158611 | 1.045782 | 1.283614 | 0.004858 |
| MPP7     | 1.172306 | 1.11018  | 1.237909 | 1.05E-08 |
| ITGB1    | 0.914216 | 0.849986 | 0.983299 | 0.015818 |
| CTF1     | 0.982842 | 0.888855 | 1.086767 | 0.735753 |
| CWC15    | 1.034871 | 0.926459 | 1.15597  | 0.543796 |
| FCGR1A   | 0.976836 | 0.923992 | 1.032702 | 0.408835 |
| ARID5B   | 0.984419 | 0.931195 | 1.040684 | 0.579737 |
| DCUN1D2  | 0.888407 | 0.823917 | 0.957944 | 0.002088 |
| TMCO3    | 0.786719 | 0.72123  | 0.858154 | 6.31E-08 |
| TMEM218  | 1.177123 | 1.077132 | 1.286396 | 0.000318 |
| TIRAP    | 1.057209 | 0.955371 | 1.169903 | 0.281695 |
| LATS2    | 0.917159 | 0.859775 | 0.978373 | 0.008711 |
| SAP18    | 0.905514 | 0.814581 | 1.006598 | 0.066037 |
| KIAA1328 | 1.120573 | 1.017389 | 1.234221 | 0.020902 |
| FAM124A  | 1.161622 | 1.057583 | 1.275894 | 0.001751 |
| MIA2     | 0.941902 | 0.847001 | 1.047436 | 0.269317 |
| HNMT     | 1.180569 | 1.11853  | 1.246049 | 1.67E-09 |
| PDCD4    | 0.900808 | 0.840249 | 0.965731 | 0.003261 |
| ADRA2A   | 1.053507 | 0.988716 | 1.122543 | 0.107498 |
| WDR17    | 1.205371 | 1.079523 | 1.345891 | 0.0009   |
| CCDC102E | 1.248381 | 1.070579 | 1.455713 | 0.004656 |
| CD226    | 1.045522 | 0.972077 | 1.124517 | 0.230958 |
| FSIP1    | 1.332371 | 1.114267 | 1.593166 | 0.001654 |
| RGS18    | 1.012925 | 0.958241 | 1.070729 | 0.650164 |
| PRSS23   | 1.253247 | 1.103299 | 1.423573 | 0.000517 |
| MTMR12   | 1.058286 | 0.963982 | 1.161815 | 0.234188 |
| CCT5     | 1.088361 | 1.001856 | 1.182335 | 0.045086 |
| DOCK1    | 1.146968 | 1.100398 | 1.195509 | 8.94E-11 |
| DIXDC1   | 1.043641 | 0.958153 | 1.136756 | 0.327274 |
| DLAT     | 1.060965 | 0.971487 | 1.158685 | 0.188017 |
| TIMM8B   | 1.171951 | 1.075376 | 1.277199 | 0.000299 |
| IL18     | 0.961866 | 0.904377 | 1.02301  | 0.216283 |
| TEX12    | 1.0155   | 0.876989 | 1.175888 | 0.837117 |
| PTS      | 1.04036  | 0.945262 | 1.145026 | 0.41852  |
| PIP4K2A  | 1.117124 | 1.04617  | 1.19289  | 0.000939 |
| FOXO1    | 0.929736 | 0.882691 | 0.979288 | 0.005961 |
| CRIM1    | 0.961627 | 0.907377 | 1.01912  | 0.186603 |
| SEC24D   | 1.008338 | 0.935671 | 1.08665  | 0.827741 |
| ABCB9    | 1.219068 | 1.08306  | 1.372155 | 0.001031 |
| RILPL2   | 0.978771 | 0.883281 | 1.084585 | 0.682042 |
| DHX37    | 1.029883 | 0.953073 | 1.112883 | 0.456524 |
| UBC      | 0.787665 | 0.723708 | 0.857274 | 3.31E-08 |
| ITPR1    | 0.994818 | 0.940693 | 1.052056 | 0.855553 |

|          |          |          |          |          |
|----------|----------|----------|----------|----------|
| SLC7A11  | 1.03854  | 0.983359 | 1.096817 | 0.174609 |
| CACNA2D  | 1.057153 | 1.006819 | 1.110002 | 0.025548 |
| DCP1B    | 1.20519  | 1.090847 | 1.331519 | 0.000243 |
| CACNA1C  | 0.917907 | 0.826357 | 1.0196   | 0.110069 |
| KCNA6    | 1.115877 | 1.031571 | 1.207074 | 0.006229 |
| THRB     | 1.268993 | 1.1412   | 1.411096 | 1.09E-05 |
| NGLY1    | 0.942151 | 0.869219 | 1.021201 | 0.14717  |
| OXSM     | 1.016111 | 0.910096 | 1.134475 | 0.776194 |
| UEVLD    | 1.075797 | 0.980745 | 1.180062 | 0.121619 |
| TMEM86A  | 1.071641 | 0.987492 | 1.162961 | 0.097256 |
| BTBD11   | 1.016372 | 0.966512 | 1.068805 | 0.526884 |
| UBE3B    | 1.113339 | 1.028821 | 1.2048   | 0.007691 |
| ANK3     | 1.1167   | 1.009681 | 1.235062 | 0.031762 |
| IPMK     | 0.894433 | 0.828689 | 0.965393 | 0.004181 |
| RAD9B    | 1.018773 | 0.928852 | 1.117399 | 0.693218 |
| DLG5     | 1.074757 | 1.003083 | 1.151553 | 0.04062  |
| SLC2A13  | 1.030833 | 0.938315 | 1.132473 | 0.526777 |
| GXYLT1   | 0.993491 | 0.917335 | 1.075969 | 0.872496 |
| TWF1     | 0.969238 | 0.896889 | 1.047423 | 0.429885 |
| DIP2C    | 0.887656 | 0.74796  | 1.053442 | 0.172552 |
| EIF4E    | 0.970341 | 0.891442 | 1.056222 | 0.486536 |
| MAGI1    | 1.148692 | 1.046318 | 1.261082 | 0.003607 |
| CSNK1G3  | 0.9854   | 0.913247 | 1.063254 | 0.704624 |
| SRFBP1   | 1.065005 | 0.973454 | 1.165166 | 0.169663 |
| FAM177A1 | 0.996669 | 0.882721 | 1.125326 | 0.95704  |
| MBIP     | 0.91884  | 0.849671 | 0.993639 | 0.034026 |
| EXT2     | 0.917083 | 0.848863 | 0.990787 | 0.028188 |
| TMEM18   | 1.091705 | 0.970619 | 1.227897 | 0.143524 |
| THRSP    | 1.105907 | 0.959594 | 1.274529 | 0.164433 |
| NDUFC2   | 1.211558 | 1.108052 | 1.324734 | 2.53E-05 |
| ME3      | 0.973237 | 0.922176 | 1.027124 | 0.323825 |
| NUBPL    | 1.070222 | 0.973297 | 1.176798 | 0.161165 |
| NEK7     | 1.038402 | 0.966869 | 1.115226 | 0.300775 |
| FER      | 0.999647 | 0.930492 | 1.073941 | 0.992298 |
| ANKRD50  | 0.961025 | 0.902181 | 1.023706 | 0.217502 |
| UPF2     | 0.93305  | 0.856664 | 1.016246 | 0.1118   |
| CDC123   | 0.913088 | 0.829849 | 1.004678 | 0.062283 |
| SCLT1    | 1.080245 | 0.991074 | 1.17744  | 0.079092 |
| CCDC3    | 1.059007 | 0.983009 | 1.140879 | 0.131315 |
| FRMD4A   | 1.086331 | 1.008247 | 1.170462 | 0.029572 |
| PTPRO    | 0.948814 | 0.859561 | 1.047335 | 0.29722  |
| EPS8     | 0.97629  | 0.917075 | 1.039329 | 0.452277 |
| ACAD8    | 1.136394 | 1.045282 | 1.235447 | 0.002713 |
| THYN1    | 1.094089 | 0.990962 | 1.207949 | 0.075041 |
| VPS26B   | 1.144855 | 1.037694 | 1.263082 | 0.006978 |
| NCAPD3   | 1.123812 | 1.039784 | 1.214631 | 0.003241 |
| VTI1A    | 0.998082 | 0.896121 | 1.111644 | 0.972144 |
| QDPR     | 1.122423 | 1.032333 | 1.220376 | 0.006823 |
| FAM160B1 | 0.943987 | 0.886417 | 1.005295 | 0.07258  |
| TEX9     | 1.072999 | 0.933617 | 1.23319  | 0.320987 |
| MMAA     | 1.269928 | 1.091285 | 1.477814 | 0.002006 |
| ZNF827   | 1.010538 | 0.955967 | 1.068224 | 0.711314 |
| NR3C2    | 1.102405 | 1.009084 | 1.204357 | 0.030746 |
| AKR1C2   | 1.196111 | 1.096022 | 1.30534  | 5.91E-05 |
| DPYSL4   | 1.243008 | 1.134475 | 1.361925 | 3.06E-06 |
| VENTX    | 1.009083 | 0.964323 | 1.05592  | 0.696085 |
| ADAM8    | 0.928716 | 0.883012 | 0.976786 | 0.004076 |
| ITIH2    | 1.008964 | 0.916148 | 1.111184 | 0.856167 |

|          |          |          |          |          |
|----------|----------|----------|----------|----------|
| KIN      | 1.035575 | 0.950226 | 1.128589 | 0.425708 |
| PIGF     | 1.076553 | 0.988398 | 1.172571 | 0.0906   |
| ANKAR    | 1.021789 | 0.937642 | 1.113489 | 0.623016 |
| INPP1    | 1.123124 | 1.018897 | 1.238012 | 0.019455 |
| MFSD6    | 0.995996 | 0.925344 | 1.072042 | 0.914882 |
| RNF144A  | 0.979035 | 0.919132 | 1.042841 | 0.5107   |
| ASAP2    | 1.151976 | 1.088022 | 1.219688 | 1.20E-06 |
| ADAM17   | 0.926391 | 0.870694 | 0.985651 | 0.015657 |
| FLI1     | 0.989765 | 0.927155 | 1.056603 | 0.757653 |
| KCNJ1    | 0.98624  | 0.900329 | 1.080348 | 0.765728 |
| TMEM45B  | 1.033588 | 0.940634 | 1.135728 | 0.492018 |
| WWC2     | 0.992617 | 0.934233 | 1.054649 | 0.81063  |
| ACSL1    | 1.029131 | 0.977188 | 1.083836 | 0.277181 |
| SLC25A4  | 1.214623 | 1.096798 | 1.345105 | 0.000188 |
| AMN1     | 1.004995 | 0.927953 | 1.088434 | 0.902546 |
| BICD1    | 1.025585 | 0.943601 | 1.114692 | 0.552306 |
| SAV1     | 1.04774  | 0.959499 | 1.144095 | 0.29884  |
| CCDC122  | 1.071411 | 0.919364 | 1.248605 | 0.377065 |
| SERP2    | 0.889437 | 0.83348  | 0.94915  | 0.000409 |
| NBAS     | 0.969734 | 0.915614 | 1.027052 | 0.294206 |
| ZNF385D  | 1.059359 | 0.952609 | 1.178071 | 0.287299 |
| GUF1     | 1.029548 | 0.943279 | 1.123706 | 0.514287 |
| SACS     | 0.955612 | 0.896928 | 1.018135 | 0.160272 |
| PABPC3   | 0.874533 | 0.795507 | 0.961409 | 0.00553  |
| CENPJ    | 1.026546 | 0.959796 | 1.097938 | 0.445008 |
| FBXO4    | 1.11386  | 1.008095 | 1.23072  | 0.034145 |
| CCL28    | 1.111047 | 1.043581 | 1.182875 | 0.000986 |
| PARP8    | 1.013446 | 0.964174 | 1.065236 | 0.599417 |
| DST      | 1.051117 | 0.992169 | 1.113568 | 0.090461 |
| BEND6    | 1.127803 | 1.041913 | 1.220773 | 0.002922 |
| TIAL1    | 1.040193 | 0.9468   | 1.142797 | 0.411645 |
| BAG3     | 1.150893 | 1.098991 | 1.205247 | 2.39E-09 |
| GLT1D1   | 1.00886  | 0.967396 | 1.0521   | 0.680389 |
| SCHIP1   | 1.130042 | 1.054958 | 1.210471 | 0.000492 |
| AP1S3    | 1.150292 | 1.081481 | 1.223481 | 8.63E-06 |
| RABGAP1L | 1.047001 | 0.971186 | 1.128734 | 0.231066 |
| TUBA3E   | 1.071018 | 0.924719 | 1.240463 | 0.3599   |
| FAM168B  | 0.90765  | 0.847926 | 0.971581 | 0.005268 |
| PTPN14   | 0.916473 | 0.871281 | 0.964009 | 0.000723 |
| MGAT5    | 0.975751 | 0.91626  | 1.039105 | 0.444379 |
| TMEM163  | 1.236804 | 1.14965  | 1.330565 | 1.19E-08 |
| GEMIN6   | 1.224929 | 1.114873 | 1.345849 | 2.40E-05 |
| POU4F1   | 0.909052 | 0.875562 | 0.943823 | 6.39E-07 |
| CYSLTR2  | 0.973272 | 0.920038 | 1.029586 | 0.345168 |
| ARL11    | 0.979457 | 0.918319 | 1.044666 | 0.527917 |
| SETBP1   | 1.05448  | 0.985291 | 1.128527 | 0.125517 |
| PSTPIP2  | 1.133598 | 1.057461 | 1.215217 | 0.000408 |
| SPC25    | 1.172247 | 1.093204 | 1.257005 | 8.12E-06 |
| PDK1     | 0.8941   | 0.841079 | 0.950464 | 0.000332 |
| PDE3B    | 0.869636 | 0.822565 | 0.9194   | 8.67E-07 |
| TCF7L1   | 0.963454 | 0.88282  | 1.051453 | 0.403789 |
| TGOLN2   | 0.927566 | 0.85037  | 1.011769 | 0.089879 |
| KCNK13   | 1.058815 | 0.929831 | 1.20569  | 0.388535 |
| UHMK1    | 1.030034 | 0.957809 | 1.107705 | 0.424985 |
| ATG10    | 1.041791 | 0.952215 | 1.139793 | 0.372111 |
| SPOCK1   | 1.246779 | 1.170345 | 1.328205 | 8.31E-12 |
| FAM151B  | 1.04     | 0.962144 | 1.124156 | 0.323198 |
| CWF19L2  | 0.979384 | 0.895984 | 1.070547 | 0.646422 |

|          |          |          |          |          |
|----------|----------|----------|----------|----------|
| JMY      | 0.982346 | 0.934262 | 1.032905 | 0.486671 |
| HOMER1   | 0.966528 | 0.889031 | 1.050781 | 0.424654 |
| XRCC4    | 1.068033 | 0.984128 | 1.159093 | 0.114865 |
| ZNF547   | 1.279037 | 1.122122 | 1.457894 | 0.000228 |
| ZNF773   | 1.074327 | 0.967696 | 1.192708 | 0.178863 |
| ZNF776   | 1.016911 | 0.950646 | 1.087794 | 0.625716 |
| ZNF256   | 0.975411 | 0.922676 | 1.03116  | 0.379977 |
| SUV39H2  | 1.045247 | 0.962862 | 1.13468  | 0.290752 |
| DCLRE1C  | 0.98148  | 0.896644 | 1.074343 | 0.685269 |
| OLAH     | 1.059449 | 0.963054 | 1.165492 | 0.235424 |
| RPP38    | 1.188771 | 1.05637  | 1.337767 | 0.004102 |
| NMT2     | 0.865011 | 0.808212 | 0.925802 | 2.85E-05 |
| ZNF837   | 0.989086 | 0.897648 | 1.089838 | 0.824517 |
| USP12    | 0.880848 | 0.813477 | 0.953799 | 0.001777 |
| CCDC50   | 0.96787  | 0.923892 | 1.013942 | 0.168697 |
| CAMK4    | 1.000424 | 0.946343 | 1.057595 | 0.988078 |
| TRIM36   | 0.979055 | 0.870447 | 1.101215 | 0.72421  |
| ZFP36L2  | 0.989869 | 0.923331 | 1.061202 | 0.774255 |
| PAN3     | 0.982962 | 0.922342 | 1.047566 | 0.59672  |
| PFKM     | 1.094378 | 1.022888 | 1.170865 | 0.008883 |
| TMEM123  | 0.99879  | 0.920273 | 1.084005 | 0.976871 |
| IGSF10   | 0.998206 | 0.95712  | 1.041056 | 0.933264 |
| SPEF2    | 1.009467 | 0.918312 | 1.109671 | 0.845282 |
| MBNL1    | 1.119232 | 1.032822 | 1.212872 | 0.006001 |
| GPD1L    | 1.069694 | 1.001676 | 1.14233  | 0.044439 |
| GJA1     | 0.994931 | 0.932722 | 1.061289 | 0.877398 |
| SLC30A6  | 1.058637 | 0.985781 | 1.136879 | 0.117275 |
| PELO     | 1.253497 | 1.143896 | 1.3736   | 1.30E-06 |
| RASGRP3  | 0.989332 | 0.936545 | 1.045093 | 0.701434 |
| SAR1B    | 1.029801 | 0.945658 | 1.121431 | 0.499537 |
| CATSPER3 | 1.225986 | 1.06365  | 1.413099 | 0.004932 |
| GPR180   | 1.196485 | 1.088421 | 1.315277 | 0.000204 |
| TCTEX1D1 | 1.066463 | 1.019614 | 1.115465 | 0.004994 |
| ANKRD22  | 0.95863  | 0.896752 | 1.024777 | 0.214594 |
| FARP1    | 1.019479 | 0.891163 | 1.166271 | 0.778646 |
| IFIT5    | 1.077365 | 1.01353  | 1.145221 | 0.016792 |
| PANK1    | 1.127615 | 1.028074 | 1.236795 | 0.010861 |
| PRDM8    | 1.047552 | 0.995446 | 1.102387 | 0.074324 |
| BMP3     | 0.952392 | 0.895339 | 1.013081 | 0.121711 |
| HHEX     | 0.977121 | 0.909791 | 1.049435 | 0.525193 |
| UTRN     | 0.979228 | 0.929537 | 1.031575 | 0.429533 |
| PTPRK    | 1.194063 | 1.093774 | 1.303548 | 7.42E-05 |
| GGPS1    | 1.076884 | 0.967365 | 1.198801 | 0.175855 |
| ZNF117   | 0.964638 | 0.899506 | 1.034487 | 0.312796 |
| MARVELD1 | 1.117015 | 0.970674 | 1.28542  | 0.122462 |
| RAD17    | 1.036215 | 0.942905 | 1.138758 | 0.459976 |
| MED21    | 0.956463 | 0.893352 | 1.024032 | 0.201212 |
| PLOD2    | 1.176608 | 1.102439 | 1.255766 | 9.80E-07 |
| STK32B   | 0.851682 | 0.809649 | 0.895896 | 5.06E-10 |
| CPB1     | 1.141591 | 1.031239 | 1.263753 | 0.01068  |
| MR1      | 1.146089 | 1.052119 | 1.248451 | 0.001784 |
| SRP19    | 0.985855 | 0.897872 | 1.082459 | 0.765173 |
| CENPH    | 1.116724 | 1.014034 | 1.229813 | 0.024889 |
| CDYL     | 0.935426 | 0.869501 | 1.006349 | 0.073416 |
| CARHSP1  | 1.066676 | 0.97489  | 1.167104 | 0.159722 |
| BANK1    | 1.019704 | 0.965642 | 1.076793 | 0.482647 |
| TXNDC11  | 0.916584 | 0.851053 | 0.987162 | 0.021371 |
| DAB2     | 0.966022 | 0.90526  | 1.030863 | 0.296985 |

|          |          |          |          |          |
|----------|----------|----------|----------|----------|
| ACMSD    | 0.998674 | 0.873555 | 1.141714 | 0.984498 |
| BCL2L11  | 1.074307 | 1.01519  | 1.136867 | 0.013065 |
| ANAPC1   | 1.019492 | 0.946435 | 1.098188 | 0.610873 |
| CAST     | 1.060112 | 0.989979 | 1.135213 | 0.09461  |
| SCOC     | 1.094317 | 0.989803 | 1.209867 | 0.078433 |
| CLGN     | 1.1796   | 1.089315 | 1.277369 | 4.79E-05 |
| CETN3    | 1.113673 | 0.998795 | 1.241764 | 0.052593 |
| SMARCA5  | 0.992432 | 0.920671 | 1.069785 | 0.842737 |
| SYCP2L   | 0.988487 | 0.92961  | 1.051093 | 0.711688 |
| BMP6     | 0.919607 | 0.855227 | 0.988833 | 0.023623 |
| RGPD3    | 0.832557 | 0.685186 | 1.011626 | 0.06523  |
| RASSF3   | 0.98149  | 0.920459 | 1.046568 | 0.568409 |
| HNRNPU   | 0.981881 | 0.90116  | 1.069833 | 0.676133 |
| RANBP2   | 0.935213 | 0.886299 | 0.986826 | 0.014532 |
| AHCTF1   | 0.929571 | 0.877031 | 0.985258 | 0.013883 |
| MERTK    | 0.964632 | 0.910516 | 1.021964 | 0.221549 |
| TMEM87B  | 1.112542 | 1.027093 | 1.205099 | 0.008907 |
| NR4A2    | 0.974072 | 0.923599 | 1.027302 | 0.333184 |
| RBMS1    | 0.916454 | 0.839967 | 0.999907 | 0.049755 |
| SCN3A    | 1.03217  | 0.927692 | 1.148415 | 0.560889 |
| CD96     | 0.927698 | 0.894194 | 0.962458 | 6.37E-05 |
| ASAP1    | 0.956936 | 0.893388 | 1.025003 | 0.209273 |
| FAM81B   | 1.103815 | 1.021599 | 1.192646 | 0.012382 |
| INO80C   | 0.948676 | 0.863706 | 1.042005 | 0.271109 |
| LPCAT1   | 1.033415 | 0.973751 | 1.096735 | 0.278676 |
| NMRAL1   | 1.08857  | 0.990646 | 1.196175 | 0.07764  |
| ING1     | 0.918884 | 0.825731 | 1.022546 | 0.120865 |
| ADPRHL1  | 0.86516  | 0.818521 | 0.914456 | 3.01E-07 |
| CMTM7    | 0.896577 | 0.837763 | 0.95952  | 0.001612 |
| FBXL2    | 1.033831 | 0.941339 | 1.135411 | 0.486568 |
| UBP1     | 1.028617 | 0.947444 | 1.116744 | 0.501119 |
| RMND5A   | 1.030328 | 0.953528 | 1.113313 | 0.449682 |
| CD8A     | 0.981915 | 0.927465 | 1.039563 | 0.53067  |
| RPIA     | 1.073462 | 0.986177 | 1.168472 | 0.101362 |
| PTPRD    | 1.121226 | 1.036247 | 1.213174 | 0.004436 |
| CNKSR3   | 1.098939 | 0.982827 | 1.22877  | 0.097737 |
| GTF2E1   | 1.037637 | 0.954325 | 1.128223 | 0.386941 |
| CFDP1    | 1.04583  | 0.926162 | 1.180961 | 0.469825 |
| ZDHHC7   | 0.936295 | 0.868179 | 1.009755 | 0.087627 |
| JAZF1    | 1.004307 | 0.947431 | 1.064597 | 0.885114 |
| CMIP     | 0.917722 | 0.848044 | 0.993126 | 0.033075 |
| PID1     | 1.188929 | 1.120181 | 1.261897 | 1.24E-08 |
| TRIP12   | 0.966847 | 0.903561 | 1.034565 | 0.329003 |
| FBXO36   | 1.163021 | 1.02274  | 1.322544 | 0.021289 |
| CEBPG    | 0.98211  | 0.903325 | 1.067768 | 0.672223 |
| KCTD15   | 0.925513 | 0.874363 | 0.979656 | 0.007618 |
| ZNF599   | 1.197797 | 1.053741 | 1.361548 | 0.005769 |
| MCOLN2   | 1.089156 | 1.044231 | 1.136013 | 7.07E-05 |
| LGI4     | 0.96426  | 0.810403 | 1.147327 | 0.681547 |
| DDAH1    | 1.107313 | 1.016059 | 1.206763 | 0.020178 |
| CHD1     | 0.912654 | 0.861972 | 0.966317 | 0.001717 |
| DGKE     | 1.132176 | 1.054366 | 1.215729 | 0.000633 |
| HS2ST1   | 1.047203 | 0.9725   | 1.127645 | 0.221906 |
| MSI2     | 1.08095  | 1.027181 | 1.137534 | 0.002788 |
| HS3ST3A1 | 0.974615 | 0.854139 | 1.112084 | 0.702509 |
| GDPD1    | 1.099007 | 1.013405 | 1.191841 | 0.0225   |
| NUS1     | 0.989916 | 0.904477 | 1.083426 | 0.825818 |
| PPP2R5E  | 0.966441 | 0.88058  | 1.060674 | 0.472089 |

|         |          |          |          |          |
|---------|----------|----------|----------|----------|
| GRAP    | 0.907002 | 0.822732 | 0.999905 | 0.049776 |
| SLC5A10 | 0.869127 | 0.804952 | 0.938419 | 0.000338 |
| AK5     | 0.91472  | 0.863318 | 0.969182 | 0.002521 |
| CABYR   | 1.019197 | 0.943961 | 1.10043  | 0.626971 |
| IMPACT  | 1.01097  | 0.941035 | 1.086103 | 0.765471 |
| TBCEL   | 1.098837 | 1.026872 | 1.175845 | 0.006386 |
| JPH3    | 1.091298 | 0.952505 | 1.250315 | 0.208084 |
| ANKH    | 0.988593 | 0.923814 | 1.057914 | 0.740045 |
| UBASH3B | 0.959413 | 0.908184 | 1.013532 | 0.138902 |
| ROBO4   | 0.951598 | 0.888128 | 1.019604 | 0.15892  |
| ROBO3   | 1.124802 | 1.052818 | 1.201708 | 0.000492 |
| TBRG1   | 1.051309 | 0.947806 | 1.166116 | 0.344029 |
| NRGN    | 1.044897 | 0.998558 | 1.093387 | 0.057745 |
| GPR15   | 1.035611 | 0.936996 | 1.144604 | 0.493122 |
| ABI3BP  | 0.995508 | 0.894311 | 1.108155 | 0.934392 |
| ANGPT1  | 1.042228 | 1.004014 | 1.081896 | 0.029996 |
| PITPNC1 | 1.008802 | 0.930133 | 1.094126 | 0.832453 |
| CC2D1B  | 1.01836  | 0.944461 | 1.098041 | 0.63597  |
| PRKCA   | 1.027457 | 0.976905 | 1.080624 | 0.292683 |
| LRRK1   | 0.870766 | 0.818978 | 0.925828 | 9.71E-06 |
| GAL3ST2 | 0.992561 | 0.947913 | 1.039311 | 0.750494 |
| ABCA5   | 1.295502 | 1.216601 | 1.379521 | 6.73E-16 |
| ENPP3   | 0.830634 | 0.77247  | 0.893178 | 5.44E-07 |
| UCHL1   | 1.152182 | 1.045712 | 1.269492 | 0.00419  |
| MIA3    | 0.920361 | 0.846362 | 1.000831 | 0.052313 |
| DISP1   | 1.053232 | 0.937863 | 1.182792 | 0.380927 |
| TNIK    | 1.005206 | 0.951295 | 1.062171 | 0.853535 |
| TDH     | 1.176094 | 1.064219 | 1.299729 | 0.001471 |
| FAM167A | 1.082608 | 0.997713 | 1.174726 | 0.056779 |
| NEIL2   | 1.077338 | 0.97652  | 1.188565 | 0.137282 |
| OBSCN   | 0.995992 | 0.934545 | 1.06148  | 0.901636 |
| LONRF1  | 0.927676 | 0.866884 | 0.992731 | 0.029936 |
| TRIM11  | 1.080783 | 1.0041   | 1.163323 | 0.038553 |
| ENAH    | 1.218883 | 1.134092 | 1.310013 | 7.43E-08 |
| SH3RF1  | 0.999352 | 0.938985 | 1.063599 | 0.983721 |
| GBP5    | 1.02604  | 0.972888 | 1.082095 | 0.343537 |
| BUB3    | 1.284422 | 1.181592 | 1.396202 | 4.12E-09 |
| MMP21   | 1.047261 | 0.960024 | 1.142425 | 0.298059 |
| LY96    | 1.008502 | 0.95486  | 1.065157 | 0.76145  |
| TMSB4Y  | 1.074356 | 1.00855  | 1.144456 | 0.026152 |
| CXADR   | 1.11639  | 1.038277 | 1.200379 | 0.002931 |
| BTG3    | 0.948971 | 0.89964  | 1.001007 | 0.054477 |
| NCAM2   | 1.158777 | 1.062562 | 1.263704 | 0.000862 |
| L3MBTL4 | 1.062091 | 0.990851 | 1.138452 | 0.089034 |
| RABGEF1 | 0.884094 | 0.818136 | 0.955371 | 0.001845 |
| MRPL39  | 1.063473 | 0.968497 | 1.167764 | 0.197285 |
| GABPA   | 0.985784 | 0.91005  | 1.067821 | 0.725551 |
| ADAMTS1 | 1.02926  | 0.951723 | 1.113114 | 0.470471 |
| TSEN2   | 1.069006 | 0.996653 | 1.146613 | 0.062014 |
| SLFN13  | 1.062075 | 1.001858 | 1.125912 | 0.043147 |
| XPC     | 1.05851  | 0.967637 | 1.157917 | 0.214379 |
| FGD5    | 1.06702  | 1.012231 | 1.124774 | 0.015867 |
| FLCN    | 1.114394 | 1.034094 | 1.20093  | 0.004531 |
| DPH3    | 0.982444 | 0.890066 | 1.084411 | 0.725183 |
| OXNAD1  | 1.017237 | 0.953048 | 1.085748 | 0.607326 |
| PLCL2   | 0.985321 | 0.927686 | 1.046537 | 0.630623 |
| CXXC1   | 1.188554 | 1.072884 | 1.316694 | 0.000944 |
| SKA1    | 1.167796 | 1.093375 | 1.247282 | 3.89E-06 |

|          |          |          |          |          |
|----------|----------|----------|----------|----------|
| PPP4R1   | 0.945147 | 0.864246 | 1.033621 | 0.216581 |
| CCDC144E | 1.065447 | 1.010211 | 1.123702 | 0.019595 |
| MPPE1    | 1.099579 | 1.001201 | 1.207623 | 0.047137 |
| USP43    | 1.019498 | 0.940817 | 1.10476  | 0.637473 |
| RAB6B    | 0.964203 | 0.905965 | 1.026185 | 0.251463 |
| EME1     | 1.072195 | 0.99126  | 1.159738 | 0.081729 |
| EPHB1    | 1.266453 | 1.131616 | 1.417357 | 3.91E-05 |
| ACSS1    | 0.970144 | 0.908999 | 1.035402 | 0.36147  |
| ANKRD40  | 1.022406 | 0.92651  | 1.128227 | 0.659238 |
| ZNF18    | 1.088473 | 0.986486 | 1.201002 | 0.091237 |
| VOPP1    | 1.07472  | 1.020244 | 1.132104 | 0.006626 |
| APOOL    | 1.01777  | 0.931223 | 1.11236  | 0.697681 |
| CYP2U1   | 1.206997 | 1.09237  | 1.333651 | 0.00022  |
| FBXL18   | 1.028521 | 0.941223 | 1.123916 | 0.534327 |
| KLF10    | 1.001006 | 0.94225  | 1.063425 | 0.97402  |
| PTPRN2   | 1.056609 | 0.994572 | 1.122515 | 0.074477 |
| AZIN1    | 1.013177 | 0.936669 | 1.095934 | 0.743841 |
| ATP6V1C1 | 1.052483 | 0.982504 | 1.127446 | 0.145074 |
| OTUD6B   | 1.061576 | 0.978108 | 1.152168 | 0.152668 |
| GTF3C6   | 1.126688 | 1.029063 | 1.233575 | 0.009895 |
| TTC39B   | 1.196475 | 1.109572 | 1.290184 | 3.12E-06 |
| AGPAT5   | 0.993593 | 0.928081 | 1.06373  | 0.853477 |
| MMS19    | 1.003321 | 0.921339 | 1.092598 | 0.939225 |
| PI4K2A   | 1.057321 | 0.999094 | 1.118941 | 0.05378  |
| MARVELD  | 1.05862  | 1.013249 | 1.106023 | 0.010807 |
| ZFYVE27  | 0.964393 | 0.897744 | 1.035989 | 0.321052 |
| GOLGA7B  | 1.232992 | 1.066728 | 1.425172 | 0.004597 |
| SLC25A28 | 1.211561 | 1.10761  | 1.325268 | 2.75E-05 |
| HSPA13   | 0.98563  | 0.911371 | 1.065939 | 0.717218 |
| SAMSN1   | 0.917079 | 0.864387 | 0.972983 | 0.004142 |
| USP25    | 0.973113 | 0.905615 | 1.045642 | 0.457423 |
| ZCCHC10  | 1.082015 | 0.974915 | 1.200881 | 0.138276 |
| MOV10    | 0.961185 | 0.893542 | 1.033948 | 0.287642 |
| RHOC     | 0.976683 | 0.914218 | 1.043415 | 0.484141 |
| PPM1J    | 0.959851 | 0.851917 | 1.08146  | 0.500774 |
| DBI      | 0.970682 | 0.915208 | 1.029519 | 0.321657 |
| SLC16A1  | 1.036836 | 0.982948 | 1.093678 | 0.184049 |
| HEATR3   | 1.094086 | 1.021514 | 1.171814 | 0.010234 |
| TRIM74   | 0.965048 | 0.906144 | 1.027781 | 0.268213 |
| OXA1L    | 0.989672 | 0.879508 | 1.113635 | 0.863109 |
| SLC7A7   | 0.950467 | 0.904089 | 0.999223 | 0.046546 |
| LARP1    | 1.007972 | 0.937027 | 1.084288 | 0.831143 |
| CNOT8    | 0.959367 | 0.882493 | 1.042937 | 0.330343 |
| LRGUK    | 1.014893 | 0.919184 | 1.120568 | 0.769893 |
| MIER3    | 0.959592 | 0.896681 | 1.026916 | 0.233167 |
| NUP205   | 1.009293 | 0.941897 | 1.081511 | 0.793065 |
| ZKSCAN2  | 0.942601 | 0.863463 | 1.028993 | 0.186442 |
| PIK3AP1  | 1.034329 | 0.970204 | 1.102692 | 0.301307 |
| RBM45    | 1.285123 | 1.151455 | 1.434309 | 7.58E-06 |
| TTN      | 0.97954  | 0.925016 | 1.037278 | 0.479291 |
| VSIG4    | 0.946518 | 0.907149 | 0.987596 | 0.011219 |
| PDIA4    | 1.025114 | 0.962639 | 1.091644 | 0.439446 |
| OTOA     | 1.322274 | 1.175774 | 1.487028 | 3.12E-06 |
| KCTD18   | 1.080621 | 0.979492 | 1.192192 | 0.121952 |
| FAM126B  | 0.985371 | 0.917402 | 1.058376 | 0.686115 |
| FZD7     | 1.055022 | 0.982144 | 1.133308 | 0.142477 |
| RNF20    | 1.062992 | 0.969997 | 1.164903 | 0.190939 |
| PPARGC1E | 1.034968 | 0.970841 | 1.103331 | 0.292257 |

|         |          |          |          |          |
|---------|----------|----------|----------|----------|
| ELMO1   | 0.898199 | 0.835537 | 0.96556  | 0.003616 |
| SLC26A2 | 1.003048 | 0.944548 | 1.06517  | 0.920939 |
| LSM11   | 1.03969  | 0.954336 | 1.132677 | 0.373172 |
| MED7    | 1.044307 | 0.947191 | 1.15138  | 0.384011 |
| RRAGA   | 1.01778  | 0.91402  | 1.133317 | 0.748032 |
| RASA2   | 1.081506 | 1.009454 | 1.158701 | 0.025916 |
| RMND1   | 1.033319 | 0.945828 | 1.128903 | 0.467767 |
| SLA     | 1.076657 | 1.023996 | 1.132026 | 0.003893 |
| TMBIM4  | 1.095547 | 1.007635 | 1.191128 | 0.032502 |
| VBP1    | 1.050449 | 0.956264 | 1.15391  | 0.304474 |
| RAB39B  | 1.163388 | 1.062613 | 1.273721 | 0.001062 |
| CLIC2   | 1.08524  | 1.033373 | 1.13971  | 0.001061 |
| AFF2    | 0.901799 | 0.863402 | 0.941903 | 3.22E-06 |
| GRIP1   | 1.080018 | 1.004147 | 1.161622 | 0.038329 |
| VPS37A  | 0.898774 | 0.83271  | 0.970079 | 0.006147 |
| PSD3    | 0.951944 | 0.899526 | 1.007416 | 0.088331 |
| GNA14   | 1.113607 | 1.046517 | 1.184998 | 0.000689 |
| FAM161B | 0.959813 | 0.861657 | 1.06915  | 0.456154 |
| GNAQ    | 0.945723 | 0.878982 | 1.017531 | 0.135035 |
| GPR61   | 1.003853 | 0.918264 | 1.09742  | 0.932592 |
| ADK     | 1.028309 | 0.93695  | 1.128576 | 0.556492 |
| BATF    | 1.313822 | 1.218842 | 1.416204 | 1.01E-12 |
| DCK     | 1.045115 | 0.959608 | 1.138241 | 0.310949 |
| ADAMTS3 | 0.936215 | 0.883309 | 0.99229  | 0.026369 |
| ALX3    | 1.276781 | 1.166508 | 1.397479 | 1.15E-07 |
| DPY19L4 | 1.029209 | 0.953967 | 1.110384 | 0.457306 |
| ART3    | 0.978404 | 0.868294 | 1.102478 | 0.720043 |
| WHAMM   | 0.949639 | 0.894397 | 1.008292 | 0.091048 |
| CXCL13  | 1.111554 | 1.019466 | 1.211962 | 0.016535 |
| N6AMT1  | 1.121014 | 1.032258 | 1.217403 | 0.006641 |
| RWDD2B  | 1.191702 | 1.087657 | 1.3057   | 0.000168 |
| USP16   | 0.93766  | 0.873373 | 1.006679 | 0.075689 |
| CCT8    | 1.053453 | 0.958833 | 1.157411 | 0.278155 |
| BACH1   | 0.9113   | 0.855132 | 0.971157 | 0.004214 |
| TSPAN7  | 0.878105 | 0.832746 | 0.925934 | 1.56E-06 |
| TIAM1   | 1.111813 | 1.052311 | 1.174679 | 0.000159 |
| RPGR    | 0.972018 | 0.903114 | 1.046179 | 0.449315 |
| PCGF6   | 1.103086 | 1.002424 | 1.213858 | 0.044479 |
| ANKRD9  | 1.086409 | 1.024447 | 1.152118 | 0.005673 |
| SFXN2   | 1.126585 | 1.040571 | 1.219709 | 0.003267 |
| FUT6    | 1.115068 | 1.000414 | 1.242861 | 0.049132 |
| TDRD9   | 1.012066 | 0.972272 | 1.053489 | 0.557868 |
| FGF18   | 0.991038 | 0.875464 | 1.121869 | 0.886846 |
| PCDH1   | 1.136649 | 1.000843 | 1.290883 | 0.048502 |
| UQCRB   | 1.039575 | 0.928096 | 1.164445 | 0.502459 |
| PTDSS1  | 0.959673 | 0.884084 | 1.041724 | 0.325415 |
| RPL30   | 0.955059 | 0.89568  | 1.018374 | 0.160314 |
| FAM122C | 1.132326 | 1.014492 | 1.263848 | 0.026651 |
| SUPV3L1 | 0.95087  | 0.877745 | 1.030088 | 0.217242 |
| FAM122B | 1.127832 | 1.027704 | 1.237715 | 0.01121  |
| EEF1A1  | 0.821242 | 0.759607 | 0.887878 | 7.52E-07 |
| FBXO43  | 1.181835 | 1.07718  | 1.296657 | 0.000413 |
| HK1     | 1.027082 | 0.959591 | 1.099319 | 0.440978 |
| TYSND1  | 1.117661 | 1.036368 | 1.20533  | 0.003888 |
| PHF6    | 1.023885 | 0.951533 | 1.101739 | 0.527858 |
| CD109   | 1.12407  | 1.079447 | 1.170538 | 1.52E-08 |
| NODAL   | 1.034997 | 0.94954  | 1.128145 | 0.43401  |
| PRG3    | 0.948136 | 0.922078 | 0.97493  | 0.00018  |



|           |          |          |          |          |
|-----------|----------|----------|----------|----------|
| UBE2L6    | 1.10802  | 1.023176 | 1.199898 | 0.011614 |
| ZDHHC5    | 1.012648 | 0.918863 | 1.116004 | 0.799909 |
| MED19     | 1.012315 | 0.917002 | 1.117534 | 0.808319 |
| ZFAND3    | 0.920354 | 0.855425 | 0.990212 | 0.026184 |
| NPTN      | 0.955242 | 0.875535 | 1.042206 | 0.302992 |
| SAMD8     | 0.990991 | 0.92252  | 1.064544 | 0.804328 |
| RAB11FIP1 | 0.948326 | 0.891629 | 1.008628 | 0.091635 |
| GLYATL2   | 1.21277  | 1.083466 | 1.357505 | 0.000798 |
| UTP14A    | 1.001652 | 0.898714 | 1.116381 | 0.976198 |
| AIFM1     | 1.120512 | 1.010375 | 1.242655 | 0.031124 |
| MAPK13    | 1.046963 | 0.982374 | 1.115798 | 0.157772 |
| BAG4      | 1.046089 | 0.958752 | 1.141381 | 0.311071 |
| MS4A1     | 0.969191 | 0.920338 | 1.020636 | 0.23566  |
| ATAD2     | 1.007652 | 0.942432 | 1.077385 | 0.823325 |
| FBXO32    | 1.082723 | 1.015553 | 1.154337 | 0.015005 |
| NSMCE2    | 1.059953 | 0.957219 | 1.173714 | 0.26298  |
| ZNF689    | 1.082379 | 0.98135  | 1.193808 | 0.113329 |
| PRR14     | 0.890141 | 0.801871 | 0.988127 | 0.028953 |
| FBRS      | 0.869714 | 0.812652 | 0.930783 | 5.54E-05 |
| FRRS1     | 1.03377  | 0.970032 | 1.101696 | 0.306364 |
| PHKG2     | 1.046345 | 0.935818 | 1.169926 | 0.426399 |
| SASS6     | 1.052227 | 0.973846 | 1.136917 | 0.197413 |
| ITGAD     | 1.174708 | 1.042364 | 1.323855 | 0.008283 |
| VPS8      | 1.070048 | 1.002202 | 1.142487 | 0.042788 |
| GALK2     | 1.007976 | 0.943879 | 1.076426 | 0.812666 |
| B3GNT7    | 1.071264 | 1.030644 | 1.113485 | 0.000482 |
| MPV17L    | 1.302312 | 1.226019 | 1.383352 | 9.84E-18 |
| BUB1B     | 1.057896 | 0.992977 | 1.127061 | 0.081537 |
| PDE6D     | 1.164978 | 1.053011 | 1.28885  | 0.003058 |
| EIF4A2    | 0.972843 | 0.895469 | 1.056902 | 0.51495  |
| BRPF1     | 1.067963 | 0.989883 | 1.152202 | 0.08961  |
| RPUSD3    | 1.033912 | 0.949449 | 1.12589  | 0.443093 |
| TATDN2    | 1.02421  | 0.930192 | 1.127731 | 0.6263   |
| GHRL      | 1.025661 | 0.963309 | 1.09205  | 0.428476 |
| SEC13     | 0.978391 | 0.876254 | 1.092434 | 0.697758 |
| EXOG      | 1.18824  | 1.095068 | 1.28934  | 3.48E-05 |
| NTAN1     | 0.921401 | 0.836003 | 1.015522 | 0.099029 |
| ZFYVE9    | 0.901319 | 0.84116  | 0.965781 | 0.0032   |
| SMG1      | 0.958171 | 0.9037   | 1.015926 | 0.152473 |
| FCHO2     | 0.908235 | 0.859025 | 0.960263 | 0.000708 |
| RBPMS     | 0.930759 | 0.880701 | 0.983661 | 0.010958 |
| TIMP4     | 1.113649 | 1.029226 | 1.204997 | 0.007448 |
| CPT2      | 1.206168 | 1.065359 | 1.365589 | 0.003081 |
| NECAP2    | 1.072672 | 0.971796 | 1.184019 | 0.163859 |
| LRP8      | 1.111788 | 1.032697 | 1.196936 | 0.004885 |
| PAXIP1    | 1.160802 | 1.047011 | 1.28696  | 0.004616 |
| SSBP3     | 1.039809 | 0.955374 | 1.131705 | 0.3663   |
| CLDN12    | 0.945032 | 0.862121 | 1.035917 | 0.22752  |
| MMP14     | 0.991611 | 0.956119 | 1.028421 | 0.650552 |
| FZD1      | 1.224597 | 1.141959 | 1.313216 | 1.32E-08 |
| GATAD1    | 1.013399 | 0.935238 | 1.098093 | 0.745167 |
| SUSD3     | 1.127569 | 1.0688   | 1.189568 | 1.10E-05 |
| TMED6     | 0.962815 | 0.879053 | 1.054559 | 0.414494 |
| DHRS4     | 1.131713 | 1.025158 | 1.249344 | 0.014189 |
| DDX19B    | 0.886271 | 0.802157 | 0.979205 | 0.017645 |
| ST3GAL2   | 0.996124 | 0.926899 | 1.070518 | 0.91583  |
| IL34      | 1.05324  | 0.93036  | 1.19235  | 0.412488 |
| DHRS1     | 1.00164  | 0.90296  | 1.111103 | 0.975301 |

|          |          |          |          |          |
|----------|----------|----------|----------|----------|
| CACNA1D  | 0.950993 | 0.840421 | 1.076114 | 0.425581 |
| KIT      | 0.94544  | 0.911211 | 0.980956 | 0.002864 |
| AASDH    | 1.038698 | 0.948099 | 1.137953 | 0.414851 |
| ZNF19    | 1.230657 | 1.046098 | 1.447776 | 0.012294 |
| CACNA2D  | 0.998236 | 0.938669 | 1.061584 | 0.955159 |
| RNF111   | 0.956867 | 0.887407 | 1.031764 | 0.251501 |
| CCNB2    | 1.104422 | 1.028821 | 1.185579 | 0.006045 |
| FAM81A   | 1.118237 | 1.015967 | 1.230801 | 0.022391 |
| MYO1E    | 1.203907 | 1.123924 | 1.289582 | 1.22E-07 |
| APPL1    | 0.886818 | 0.826028 | 0.952083 | 0.000916 |
| AFAP1L1  | 0.886146 | 0.802022 | 0.979092 | 0.017542 |
| TSC22D3  | 1.047991 | 0.989266 | 1.110202 | 0.111122 |
| DYRK1A   | 0.99136  | 0.924516 | 1.063037 | 0.807508 |
| KCNJ15   | 1.126107 | 1.031989 | 1.22881  | 0.007652 |
| ERG      | 0.995233 | 0.951251 | 1.041247 | 0.835833 |
| ETS2     | 1.124091 | 1.054043 | 1.198793 | 0.000366 |
| TSPAN18  | 1.140585 | 1.055956 | 1.231995 | 0.000825 |
| LCA5L    | 0.997939 | 0.873931 | 1.139544 | 0.975689 |
| SLC35B2  | 0.976997 | 0.903738 | 1.056194 | 0.55842  |
| TMEM164  | 1.028707 | 0.959905 | 1.10244  | 0.422927 |
| MX1      | 1.078528 | 1.032347 | 1.126776 | 0.00071  |
| C2CD2    | 0.941434 | 0.881149 | 1.005844 | 0.073873 |
| SLC38A10 | 1.081567 | 1.020374 | 1.14643  | 0.008322 |
| ZNF618   | 1.033631 | 0.966882 | 1.104988 | 0.331468 |
| SVOPL    | 0.973608 | 0.871935 | 1.087138 | 0.634582 |
| SNX22    | 1.034201 | 0.958349 | 1.116058 | 0.386876 |
| UBN2     | 1.007424 | 0.938494 | 1.081417 | 0.837924 |
| BRAF     | 0.950723 | 0.887197 | 1.018798 | 0.1521   |
| PSMG3    | 1.291478 | 1.168185 | 1.427785 | 5.84E-07 |
| WDR19    | 1.015754 | 0.940226 | 1.09735  | 0.691728 |
| SLC37A3  | 1.119053 | 1.035081 | 1.209839 | 0.004709 |
| AP3S2    | 1.016627 | 0.928821 | 1.112733 | 0.720497 |
| FMNL2    | 0.96492  | 0.893909 | 1.041572 | 0.359865 |
| SPPL3    | 0.890605 | 0.814448 | 0.973883 | 0.011078 |
| RAB28    | 1.103112 | 0.997361 | 1.220077 | 0.056318 |
| TNFRSF14 | 1.015205 | 0.942811 | 1.093157 | 0.689309 |
| PANK4    | 1.03428  | 0.960838 | 1.113335 | 0.369773 |
| MEGF11   | 1.064512 | 0.990308 | 1.144277 | 0.089926 |
| PEX10    | 1.037688 | 0.942504 | 1.142484 | 0.451057 |
| RER1     | 1.19515  | 1.068738 | 1.336513 | 0.001775 |
| RADIL    | 1.012734 | 0.932072 | 1.100376 | 0.765087 |
| SKI      | 1.009837 | 0.950007 | 1.073435 | 0.753415 |
| WIPI2    | 0.922768 | 0.848347 | 1.003717 | 0.061002 |
| LDLRAP1  | 1.149912 | 1.07501  | 1.230033 | 4.81E-05 |
| AGAP1    | 0.98893  | 0.89837  | 1.08862  | 0.820299 |
| KRTCAP3  | 1.021669 | 0.95599  | 1.091861 | 0.527158 |
| PAFAH2   | 0.8939   | 0.824481 | 0.969163 | 0.006541 |
| MRPL17   | 1.235359 | 1.11341  | 1.370665 | 6.73E-05 |
| DUSP2    | 0.947984 | 0.899208 | 0.999406 | 0.047478 |
| UBXN11   | 1.018943 | 0.946669 | 1.096734 | 0.617132 |
| PTPDC1   | 1.154101 | 1.054702 | 1.262867 | 0.001815 |
| GALNT14  | 0.911451 | 0.864969 | 0.960431 | 0.000517 |
| NCK1     | 0.912575 | 0.832714 | 1.000096 | 0.05024  |
| HPD      | 1.078861 | 0.990848 | 1.174692 | 0.080426 |
| RHPN1    | 1.053851 | 1.003364 | 1.106878 | 0.036256 |
| TPRG1L   | 1.083492 | 1.001587 | 1.172096 | 0.045555 |
| LRRC43   | 0.914179 | 0.840201 | 0.994671 | 0.037154 |
| XKR8     | 0.9845   | 0.907229 | 1.068352 | 0.707975 |

|          |          |          |          |          |
|----------|----------|----------|----------|----------|
| CNNM4    | 0.930811 | 0.859042 | 1.008576 | 0.079881 |
| EYA3     | 1.052773 | 0.978701 | 1.132451 | 0.167098 |
| DZIP1L   | 1.221602 | 1.139542 | 1.309571 | 1.68E-08 |
| TMSB15A  | 1.251589 | 1.170174 | 1.338668 | 6.18E-11 |
| FANCC    | 1.151154 | 1.047215 | 1.265411 | 0.003552 |
| MRAS     | 1.116894 | 1.05512  | 1.182285 | 0.00014  |
| WASF2    | 0.861074 | 0.787111 | 0.941986 | 0.001098 |
| ABHD3    | 0.96716  | 0.893448 | 1.046955 | 0.409071 |
| FAIM     | 1.066259 | 0.984364 | 1.154966 | 0.115613 |
| CLSTN2   | 1.10828  | 1.071012 | 1.146845 | 3.84E-09 |
| COLEC12  | 0.81044  | 0.707435 | 0.928441 | 0.002441 |
| RNF207   | 1.187684 | 1.071475 | 1.316498 | 0.00106  |
| CUL4B    | 0.974033 | 0.89425  | 1.060934 | 0.546239 |
| GPR153   | 0.911565 | 0.867967 | 0.957352 | 0.000213 |
| SLC13A3  | 1.19719  | 1.096633 | 1.306968 | 5.80E-05 |
| GPRASP2  | 1.305285 | 1.168988 | 1.457473 | 2.19E-06 |
| RHBDL2   | 1.14094  | 0.998005 | 1.304345 | 0.053517 |
| AUTS2    | 0.944993 | 0.882463 | 1.011953 | 0.105278 |
| SHROOM4  | 1.113753 | 1.039128 | 1.193737 | 0.002329 |
| CDC25C   | 1.082849 | 1.000637 | 1.171815 | 0.048181 |
| MITD1    | 1.140712 | 1.030782 | 1.262366 | 0.010885 |
| EIF5B    | 0.935397 | 0.847386 | 1.03255  | 0.185291 |
| RIBC1    | 1.126082 | 0.980153 | 1.293736 | 0.093567 |
| TSPAN33  | 0.91849  | 0.866073 | 0.974079 | 0.004569 |
| AHCYL2   | 1.007825 | 0.936395 | 1.084703 | 0.83538  |
| B4GALT5  | 1.014764 | 0.951272 | 1.082495 | 0.656617 |
| CD1D     | 1.092118 | 1.047042 | 1.139133 | 4.17E-05 |
| CD1A     | 1.108372 | 0.980269 | 1.253215 | 0.100599 |
| SPATA2   | 0.87519  | 0.8069   | 0.949259 | 0.001299 |
| CD1C     | 0.921271 | 0.871494 | 0.973891 | 0.00381  |
| CD1E     | 0.854173 | 0.761266 | 0.958419 | 0.0073   |
| HMHB1    | 1.121443 | 1.004544 | 1.251946 | 0.041282 |
| NCF1     | 1.038924 | 0.993487 | 1.086439 | 0.094213 |
| TSR2     | 1.033609 | 0.925583 | 1.154244 | 0.557251 |
| PPP1R9A  | 1.152065 | 1.074244 | 1.235522 | 7.28E-05 |
| ZC3H18   | 0.976734 | 0.890605 | 1.071193 | 0.617213 |
| ZFAND2B  | 1.299355 | 1.172848 | 1.439507 | 5.43E-07 |
| GDPD5    | 1.114105 | 1.040833 | 1.192536 | 0.001852 |
| DYNC111  | 1.093442 | 1.023516 | 1.168146 | 0.008066 |
| PFKFB1   | 1.246525 | 1.05864  | 1.467754 | 0.008203 |
| ALAS2    | 0.980412 | 0.954859 | 1.006649 | 0.142061 |
| TMED4    | 1.10669  | 0.990687 | 1.236275 | 0.072757 |
| PPP1R15B | 0.992315 | 0.923267 | 1.066527 | 0.833939 |
| COPG2    | 0.984821 | 0.924573 | 1.048996 | 0.634878 |
| ZSCAN12  | 0.915212 | 0.845755 | 0.990372 | 0.027792 |
| TAGLN2   | 1.170226 | 1.079494 | 1.268585 | 0.000135 |
| ELK4     | 0.993967 | 0.92118  | 1.072504 | 0.876057 |
| SLC45A3  | 0.852393 | 0.815207 | 0.891276 | 2.26E-12 |
| DUSP23   | 1.091495 | 1.031034 | 1.155502 | 0.002603 |
| RNF166   | 1.019757 | 0.93833  | 1.108251 | 0.64495  |
| NBL1     | 0.914165 | 0.867546 | 0.963288 | 0.000778 |
| HTR6     | 1.139167 | 0.995367 | 1.303741 | 0.058423 |
| F11R     | 0.903653 | 0.85161  | 0.958877 | 0.000816 |
| USF1     | 1.039405 | 0.958305 | 1.127368 | 0.351103 |
| SPATA2L  | 0.972844 | 0.898359 | 1.053505 | 0.498133 |
| NIT1     | 1.022383 | 0.936738 | 1.115858 | 0.619953 |
| DEDD     | 1.002622 | 0.880703 | 1.141419 | 0.968424 |
| ZNF276   | 1.026788 | 0.953721 | 1.105453 | 0.482753 |

|          |          |          |          |          |
|----------|----------|----------|----------|----------|
| NPM2     | 1.055161 | 0.986143 | 1.129009 | 0.119787 |
| FGF17    | 1.115285 | 1.002922 | 1.240238 | 0.04403  |
| CDA      | 0.99194  | 0.956966 | 1.028192 | 0.658578 |
| PINK1    | 1.043919 | 0.955422 | 1.140613 | 0.341609 |
| B4GALT3  | 1.150183 | 1.020809 | 1.295953 | 0.021548 |
| ADAMTS4  | 1.080083 | 0.964052 | 1.210079 | 0.183982 |
| FAM160B2 | 1.130835 | 1.026255 | 1.246073 | 0.013014 |
| NDUFS2   | 1.229464 | 1.086309 | 1.391484 | 0.001073 |
| SLC5A11  | 1.017694 | 0.883719 | 1.17198  | 0.807587 |
| FCER1G   | 1.034678 | 0.992575 | 1.078567 | 0.107759 |
| APOA2    | 1.047502 | 1.000507 | 1.096705 | 0.047522 |
| TOMM40L  | 1.174658 | 1.084524 | 1.272282 | 7.75E-05 |
| MPZ      | 0.954736 | 0.882051 | 1.033412 | 0.251592 |
| CACHD1   | 1.140902 | 1.070336 | 1.21612  | 5.20E-05 |
| CDC42SE2 | 0.973037 | 0.903568 | 1.047846 | 0.469517 |
| RAPGEF6  | 1.045409 | 0.963402 | 1.134397 | 0.286679 |
| EPB41    | 0.949098 | 0.893659 | 1.007975 | 0.088888 |
| ALG8     | 1.114478 | 1.032008 | 1.203538 | 0.005724 |
| FBXW5    | 1.058678 | 0.95881  | 1.168947 | 0.259348 |
| SYNJ1    | 1.053497 | 0.979648 | 1.132914 | 0.159886 |
| IFNAR2   | 1.106515 | 1.006324 | 1.216682 | 0.036605 |
| MRPL10   | 1.107805 | 0.991876 | 1.237285 | 0.069474 |
| IFNGR2   | 1.006962 | 0.929585 | 1.090781 | 0.864951 |
| GART     | 1.044875 | 0.97165  | 1.123618 | 0.236353 |
| SON      | 0.953296 | 0.887651 | 1.023797 | 0.18888  |
| DONSON   | 1.055396 | 0.968918 | 1.149593 | 0.21643  |
| SV2A     | 1.046549 | 0.99808  | 1.097371 | 0.060037 |
| STC1     | 1.076375 | 0.960167 | 1.206647 | 0.206722 |
| CSRP1    | 1.212604 | 1.121206 | 1.311452 | 1.43E-06 |
| C1QC     | 1.010917 | 0.966105 | 1.057807 | 0.638813 |
| RCAN1    | 1.114519 | 1.043753 | 1.190084 | 0.001198 |
| UBE2Z    | 1.03615  | 0.945208 | 1.135842 | 0.448639 |
| SNF8     | 1.248081 | 1.098137 | 1.418499 | 0.00069  |
| CCDC24   | 1.244538 | 1.124998 | 1.376779 | 2.18E-05 |
| RUNX1    | 0.906273 | 0.846319 | 0.970475 | 0.00483  |
| IGF2BP1  | 1.107447 | 1.06413  | 1.152528 | 5.35E-07 |
| CBR1     | 1.149595 | 1.080811 | 1.222756 | 9.48E-06 |
| CBR3     | 1.408747 | 1.212273 | 1.637063 | 7.76E-06 |
| MORC3    | 0.974286 | 0.903144 | 1.051031 | 0.500697 |
| CHAF1B   | 1.214493 | 1.105291 | 1.334485 | 5.29E-05 |
| HLCS     | 1.106468 | 1.01404  | 1.20732  | 0.023012 |
| SCUBE1   | 1.054214 | 1.009988 | 1.100375 | 0.015757 |
| ARHGAP2  | 1.034681 | 0.959154 | 1.116155 | 0.378004 |
| ADPGK    | 0.934605 | 0.863142 | 1.011986 | 0.095634 |
| PTMS     | 1.1369   | 1.072731 | 1.204908 | 1.50E-05 |
| PADI4    | 0.998692 | 0.960497 | 1.038407 | 0.94757  |
| ADIPOR1  | 0.903825 | 0.830955 | 0.983085 | 0.018387 |
| CYB5R1   | 1.308493 | 1.169702 | 1.463752 | 2.60E-06 |
| PSMD4    | 1.146942 | 1.02584  | 1.282339 | 0.016037 |
| ATP13A2  | 1.199768 | 1.128113 | 1.275974 | 6.77E-09 |
| PSMB4    | 1.096141 | 0.958143 | 1.254014 | 0.181178 |
| IRX6     | 0.856345 | 0.775656 | 0.945429 | 0.002131 |
| BTG2     | 1.108006 | 1.037243 | 1.183598 | 0.00232  |
| HK2      | 0.857269 | 0.81424  | 0.902572 | 4.59E-09 |
| C1R      | 1.281188 | 1.166738 | 1.406866 | 2.10E-07 |
| ALDH4A1  | 0.979879 | 0.917079 | 1.04698  | 0.547534 |
| STARD9   | 1.046488 | 0.984836 | 1.111999 | 0.142447 |
| THEM4    | 1.097052 | 1.023477 | 1.175917 | 0.00892  |

|           |          |          |          |          |
|-----------|----------|----------|----------|----------|
| UBR1      | 1.021356 | 0.955999 | 1.09118  | 0.531127 |
| AMFR      | 0.945535 | 0.881317 | 1.014432 | 0.118602 |
| MED8      | 1.134345 | 1.007228 | 1.277505 | 0.037642 |
| RGL4      | 1.041919 | 0.980562 | 1.107115 | 0.184818 |
| RSPRY1    | 1.044418 | 0.960059 | 1.136191 | 0.311829 |
| CCDC17    | 0.981015 | 0.926453 | 1.038791 | 0.511516 |
| GPBP1L1   | 1.013714 | 0.929561 | 1.105486 | 0.758048 |
| NAE1      | 1.150226 | 1.052585 | 1.256924 | 0.001986 |
| TMEM69    | 0.980971 | 0.893406 | 1.077118 | 0.687143 |
| ACE       | 1.003895 | 0.922454 | 1.092526 | 0.928246 |
| SPON2     | 1.07235  | 1.010804 | 1.137644 | 0.020542 |
| CHCHD6    | 1.150942 | 1.04355  | 1.269386 | 0.004909 |
| CTBP1     | 1.142048 | 1.044295 | 1.248952 | 0.003622 |
| LRRC36    | 0.958444 | 0.809001 | 1.135493 | 0.623596 |
| TPPP3     | 0.924741 | 0.890631 | 0.960158 | 4.50E-05 |
| ZDHH1     | 0.844703 | 0.78059  | 0.914081 | 2.78E-05 |
| ATP6V0D1  | 0.927289 | 0.848108 | 1.013864 | 0.097394 |
| AGRP      | 0.916412 | 0.854733 | 0.982542 | 0.014074 |
| ZFYVE28   | 1.017921 | 0.933142 | 1.110403 | 0.688905 |
| FAM131B   | 1.102666 | 0.963753 | 1.261602 | 0.154863 |
| RGS12     | 1.04927  | 0.976324 | 1.127666 | 0.190802 |
| PSKH1     | 1.073087 | 0.992415 | 1.160317 | 0.076891 |
| ZYX       | 0.826773 | 0.77123  | 0.886316 | 8.27E-08 |
| ABR       | 1.108395 | 1.049804 | 1.170256 | 0.000204 |
| CCDC117   | 1.042085 | 0.951366 | 1.141454 | 0.375026 |
| ZNF230    | 1.067668 | 0.968915 | 1.176487 | 0.186079 |
| CCDC107   | 1.281728 | 1.135393 | 1.446923 | 6.00E-05 |
| ZNF222    | 0.938909 | 0.87457  | 1.007982 | 0.081777 |
| NPR2      | 1.475653 | 1.336004 | 1.629898 | 1.71E-14 |
| ZNF221    | 1.066784 | 0.984926 | 1.155445 | 0.112495 |
| ZNF233    | 0.992574 | 0.907912 | 1.085131 | 0.869842 |
| ZNF235    | 0.995343 | 0.910501 | 1.08809  | 0.918201 |
| GNE       | 0.985293 | 0.90602  | 1.071503 | 0.729193 |
| TNFRSF13A | 1.001809 | 0.947905 | 1.058778 | 0.948939 |
| PTGIR     | 0.938522 | 0.889158 | 0.990626 | 0.021357 |
| CALM3     | 1.063316 | 0.972297 | 1.162857 | 0.178743 |
| DFFA      | 1.063732 | 0.969582 | 1.167025 | 0.191326 |
| CCDC28B   | 1.1161   | 1.006533 | 1.237593 | 0.037207 |
| IQCC      | 1.090385 | 0.999312 | 1.189758 | 0.051835 |
| BSDC1     | 0.90114  | 0.844197 | 0.961924 | 0.001775 |
| ZBTB8A    | 0.965331 | 0.907985 | 1.026298 | 0.258802 |
| ATAD3B    | 0.862627 | 0.804038 | 0.925486 | 3.83E-05 |
| SSU72     | 1.042304 | 0.929641 | 1.16862  | 0.477756 |
| UBE2J2    | 1.031063 | 0.939519 | 1.131526 | 0.519029 |
| ZNF362    | 1.048603 | 0.960695 | 1.144555 | 0.288074 |
| FNDC5     | 1.079757 | 0.951363 | 1.225478 | 0.23482  |
| CPAMD8    | 0.974261 | 0.894463 | 1.061177 | 0.549786 |
| NR2F6     | 1.03493  | 0.957041 | 1.119158 | 0.389759 |
| ANKLE1    | 1.014558 | 0.94821  | 1.085547 | 0.675334 |
| CCDC58    | 1.108679 | 0.992983 | 1.237855 | 0.066544 |
| KALRN     | 1.064168 | 0.969984 | 1.167497 | 0.188374 |
| CILP2     | 0.83446  | 0.782503 | 0.889867 | 3.44E-08 |
| ABCG1     | 1.038511 | 0.983669 | 1.096412 | 0.172215 |
| TFF3      | 0.948022 | 0.890441 | 1.009327 | 0.095    |
| UBASH3A   | 1.017783 | 0.952985 | 1.086986 | 0.599468 |
| RSPH1     | 1.106646 | 0.998239 | 1.226827 | 0.054048 |
| SLC37A1   | 1.112645 | 1.039177 | 1.191307 | 0.002194 |
| PDE9A     | 1.104979 | 1.027094 | 1.188771 | 0.007433 |

|          |          |          |          |          |
|----------|----------|----------|----------|----------|
| WDR4     | 1.079226 | 1.009851 | 1.153367 | 0.024504 |
| NDUFV3   | 1.089529 | 0.99314  | 1.195274 | 0.069629 |
| PKNOX1   | 1.149152 | 1.047144 | 1.261096 | 0.003376 |
| U2AF1    | 0.979253 | 0.930217 | 1.030874 | 0.423791 |
| HSF2BP   | 1.163621 | 0.987035 | 1.371801 | 0.071144 |
| RRP1B    | 1.068092 | 0.989768 | 1.152614 | 0.09002  |
| PD XK    | 0.998206 | 0.932435 | 1.068616 | 0.958813 |
| G6PD     | 1.065702 | 0.983027 | 1.15533  | 0.122473 |
| CSTB     | 1.040655 | 0.965401 | 1.121776 | 0.298091 |
| RRP1     | 1.031513 | 0.955894 | 1.113116 | 0.424447 |
| AGPAT3   | 1.013128 | 0.947552 | 1.083242 | 0.702455 |
| TRAPPC10 | 0.94478  | 0.875343 | 1.019725 | 0.144717 |
| GAB3     | 1.047298 | 0.979259 | 1.120064 | 0.177526 |
| ICOSLG   | 0.914891 | 0.846668 | 0.988611 | 0.02447  |
| ZNF66    | 0.993996 | 0.930289 | 1.062067 | 0.858581 |
| LRRC3    | 1.136315 | 1.031911 | 1.251283 | 0.009356 |
| ITGB2    | 1.070861 | 1.017706 | 1.126793 | 0.008399 |
| RALGDS   | 1.152318 | 1.067547 | 1.24382  | 0.000276 |
| FTCD     | 0.978746 | 0.857858 | 1.11667  | 0.749431 |
| LSS      | 1.053196 | 0.979067 | 1.132939 | 0.163969 |
| VAV2     | 1.004753 | 0.951028 | 1.061512 | 0.86571  |
| MCM3AP   | 0.983034 | 0.917802 | 1.052902 | 0.625231 |
| PCNT     | 1.016641 | 0.943615 | 1.095318 | 0.664331 |
| DIP2A    | 1.004391 | 0.94052  | 1.072599 | 0.896021 |
| S100B    | 0.999301 | 0.954324 | 1.046397 | 0.976244 |
| PRMT2    | 1.09641  | 1.002661 | 1.198923 | 0.043566 |
| CLDND2   | 1.200872 | 1.107458 | 1.302165 | 9.41E-06 |
| ADAMTS1  | 1.072712 | 0.969809 | 1.186533 | 0.172519 |
| SLC2A6   | 0.961319 | 0.911103 | 1.014302 | 0.149531 |
| ZNF761   | 1.141458 | 1.044308 | 1.247645 | 0.003554 |
| ZNF714   | 1.026509 | 0.949534 | 1.109723 | 0.51062  |
| GPSM1    | 0.947057 | 0.902568 | 0.99374  | 0.026707 |
| HIPK4    | 0.907638 | 0.810198 | 1.016797 | 0.094429 |
| TOR2A    | 1.130537 | 1.021574 | 1.251122 | 0.017656 |
| ST6GALNA | 1.104737 | 1.02078  | 1.195598 | 0.013512 |
| SHKBP1   | 1.111105 | 1.007907 | 1.224869 | 0.034148 |
| RDH13    | 1.104024 | 1.034694 | 1.178    | 0.002784 |
| ZER1     | 0.999713 | 0.924216 | 1.081377 | 0.994285 |
| ZDHHC12  | 1.028888 | 0.948124 | 1.116531 | 0.49474  |
| PKN3     | 0.992202 | 0.926629 | 1.062415 | 0.822439 |
| BRSK1    | 1.180034 | 1.084404 | 1.284098 | 0.000123 |
| COX6B2   | 0.893831 | 0.792728 | 1.007829 | 0.066858 |
| TAOK1    | 1.033201 | 0.96818  | 1.102589 | 0.324686 |
| MED27    | 1.145851 | 1.019039 | 1.288444 | 0.022899 |
| DEDD2    | 0.957849 | 0.887959 | 1.03324  | 0.265259 |
| SIK3     | 0.90478  | 0.837227 | 0.977783 | 0.011489 |
| MPZL3    | 1.088639 | 1.009849 | 1.173576 | 0.026715 |
| NEK8     | 1.165613 | 1.065699 | 1.274894 | 0.000803 |
| TLCD1    | 1.049223 | 0.971321 | 1.133373 | 0.222191 |
| PCSK7    | 1.054354 | 0.976593 | 1.138307 | 0.175724 |
| SAFB     | 0.923385 | 0.853377 | 0.999136 | 0.047542 |
| CD3G     | 1.06832  | 1.012742 | 1.126948 | 0.015332 |
| S100A1   | 1.37221  | 1.199826 | 1.569362 | 3.84E-06 |
| CXCR5    | 1.007247 | 0.884155 | 1.147475 | 0.913541 |
| ZBTB7B   | 1.023787 | 0.966261 | 1.084739 | 0.425593 |
| FLAD1    | 1.20395  | 1.078002 | 1.344613 | 0.000994 |
| SHC1     | 0.919163 | 0.840591 | 1.005079 | 0.06448  |
| VPS11    | 0.980327 | 0.888702 | 1.081399 | 0.691467 |

|          |          |          |          |          |
|----------|----------|----------|----------|----------|
| NLRX1    | 0.956788 | 0.885462 | 1.03386  | 0.263772 |
| ADAR     | 1.020624 | 0.947311 | 1.09961  | 0.59144  |
| IL6R     | 1.068331 | 1.014741 | 1.12475  | 0.011827 |
| UBE2Q1   | 1.06867  | 0.958594 | 1.191385 | 0.231116 |
| CHRNA2   | 1.035203 | 0.950855 | 1.127033 | 0.42496  |
| CRTC2    | 0.902565 | 0.830803 | 0.980525 | 0.015299 |
| ANO10    | 1.100734 | 1.016655 | 1.191765 | 0.017913 |
| FDPS     | 1.130353 | 1.012031 | 1.262509 | 0.029859 |
| RUSC1    | 1.105048 | 0.99494  | 1.227342 | 0.062148 |
| FAM189B  | 1.070399 | 0.98434  | 1.163983 | 0.111639 |
| PAQR6    | 1.003345 | 0.936596 | 1.074851 | 0.924259 |
| PMF1     | 1.031148 | 0.931112 | 1.141931 | 0.555789 |
| SLC25A44 | 1.021344 | 0.949182 | 1.098991 | 0.572142 |
| LMNA     | 0.968194 | 0.922482 | 1.016172 | 0.190245 |
| CCR5     | 1.059371 | 0.996856 | 1.125807 | 0.063098 |
| NBEAL2   | 1.070545 | 1.011726 | 1.132784 | 0.018064 |
| CCDC12   | 1.085104 | 0.980607 | 1.200737 | 0.1139   |
| PTH1R    | 0.865426 | 0.796715 | 0.940063 | 0.000616 |
| UBQLN4   | 1.051425 | 0.97181  | 1.137562 | 0.21196  |
| GPATCH4  | 1.20085  | 1.093994 | 1.318142 | 0.000118 |
| FCRL3    | 0.989812 | 0.920787 | 1.064011 | 0.781267 |
| FGFR4    | 1.155532 | 1.038613 | 1.285613 | 0.007906 |
| NACC1    | 0.940826 | 0.874841 | 1.011789 | 0.10016  |
| HK3      | 1.04117  | 1.00779  | 1.075655 | 0.015236 |
| IER2     | 0.960418 | 0.891815 | 1.034298 | 0.285472 |
| ZNF394   | 0.941951 | 0.871656 | 1.017915 | 0.130725 |
| CPSF4    | 1.093656 | 0.996991 | 1.199693 | 0.057942 |
| LY6E     | 1.015023 | 0.964252 | 1.068468 | 0.56898  |
| VPS28    | 1.061549 | 0.929748 | 1.212034 | 0.377209 |
| PTGER1   | 0.923218 | 0.862177 | 0.988581 | 0.022078 |
| RECQL4   | 1.104412 | 1.033492 | 1.180199 | 0.003359 |
| LRRC14   | 1.172837 | 1.078598 | 1.275311 | 0.000191 |
| ZNF333   | 0.980623 | 0.900268 | 1.06815  | 0.653743 |
| PPP1R16A | 1.169044 | 1.057004 | 1.292959 | 0.002378 |
| ORAI2    | 0.906457 | 0.844149 | 0.973364 | 0.006872 |
| ALKBH4   | 0.917798 | 0.843711 | 0.99839  | 0.045772 |
| SH2B2    | 0.972661 | 0.911475 | 1.037954 | 0.403029 |
| SQSTM1   | 0.927162 | 0.867282 | 0.991178 | 0.026412 |
| MGAT4B   | 0.928359 | 0.861146 | 1.000818 | 0.052546 |
| RPL8     | 0.897448 | 0.824078 | 0.977351 | 0.012904 |
| MAML1    | 0.945505 | 0.874962 | 1.021735 | 0.156643 |
| LRWD1    | 0.957674 | 0.886941 | 1.034048 | 0.269279 |
| FBXL13   | 0.949734 | 0.884708 | 1.019539 | 0.154091 |
| NAPEPLD  | 1.08391  | 0.999171 | 1.175835 | 0.052381 |
| SCGB3A1  | 1.043973 | 0.969579 | 1.124075 | 0.253904 |
| PSMC2    | 1.002456 | 0.904531 | 1.110981 | 0.962701 |
| USP41    | 1.003239 | 0.912126 | 1.103453 | 0.94693  |
| YDJC     | 1.0339   | 0.948996 | 1.1264   | 0.445739 |
| CCDC116  | 1.123087 | 0.960386 | 1.313351 | 0.146012 |
| DVL3     | 0.98713  | 0.892713 | 1.091533 | 0.800631 |
| AP2M1    | 1.061526 | 0.952058 | 1.18358  | 0.282275 |
| ABCF3    | 0.952371 | 0.879662 | 1.03109  | 0.228446 |
| PCYT1A   | 1.140265 | 1.038922 | 1.251492 | 0.005709 |
| U2AF1L4  | 1.083046 | 0.96295  | 1.21812  | 0.183396 |
| BDH1     | 0.969052 | 0.895137 | 1.04907  | 0.437402 |
| NPHS1    | 0.937698 | 0.862934 | 1.01894  | 0.129171 |
| THAP8    | 1.002711 | 0.921637 | 1.090918 | 0.949811 |
| COX7A1   | 0.956699 | 0.905904 | 1.010343 | 0.111768 |

|          |          |          |          |          |
|----------|----------|----------|----------|----------|
| ZNF382   | 0.966455 | 0.879747 | 1.061709 | 0.476812 |
| LRRC56   | 1.185877 | 1.098893 | 1.279747 | 1.15E-05 |
| PLXDC1   | 1.150371 | 1.029173 | 1.285842 | 0.013655 |
| PGAP3    | 1.136635 | 1.042279 | 1.239534 | 0.003774 |
| IKZF3    | 1.003975 | 0.952516 | 1.058214 | 0.882519 |
| GRIN2C   | 0.999783 | 0.937271 | 1.066464 | 0.994744 |
| FDXR     | 1.214652 | 1.123723 | 1.312939 | 9.67E-07 |
| SAP30BP  | 0.956516 | 0.874367 | 1.046383 | 0.331866 |
| ACOX1    | 1.059884 | 0.980793 | 1.145354 | 0.141608 |
| PRPSAP1  | 1.177119 | 1.064526 | 1.301621 | 0.001478 |
| CYGB     | 0.916648 | 0.845299 | 0.99402  | 0.035287 |
| ZNF577   | 1.005181 | 0.921332 | 1.096662 | 0.907422 |
| TMEM143  | 1.074254 | 0.968546 | 1.1915   | 0.175337 |
| KLHL10   | 1.191611 | 1.020822 | 1.390974 | 0.026346 |
| HCRT     | 1.156979 | 1.010279 | 1.324982 | 0.035049 |
| ALDH16A1 | 1.124812 | 1.035411 | 1.221932 | 0.005377 |
| ITGA5    | 0.964719 | 0.905946 | 1.027304 | 0.262714 |
| SIGLEC11 | 1.075387 | 0.954007 | 1.212211 | 0.234275 |
| ZNF385A  | 1.009747 | 0.953257 | 1.069584 | 0.741233 |
| SIGLEC16 | 0.97024  | 0.889967 | 1.057752 | 0.492911 |
| MPP3     | 1.32536  | 1.21475  | 1.44604  | 2.37E-10 |
| NAGS     | 1.047601 | 0.919168 | 1.193979 | 0.485884 |
| LSM12    | 0.981153 | 0.888486 | 1.083485 | 0.706999 |
| ASB16    | 1.109469 | 1.025348 | 1.200491 | 0.009817 |
| JOSD2    | 1.13779  | 1.037944 | 1.247241 | 0.005875 |
| SHANK1   | 0.926776 | 0.887905 | 0.967349 | 0.000504 |
| DBF4B    | 1.118131 | 1.010081 | 1.237739 | 0.031287 |
| PLCD3    | 0.810782 | 0.752984 | 0.873015 | 2.71E-08 |
| FMNL3    | 1.164769 | 1.091057 | 1.243462 | 4.82E-06 |
| RACGAP1  | 1.075167 | 1.0058   | 1.149318 | 0.033178 |
| LARP4    | 1.060178 | 0.980686 | 1.146113 | 0.14169  |
| RAVER1   | 0.897675 | 0.828229 | 0.972944 | 0.008598 |
| SYCE2    | 0.93897  | 0.874254 | 1.008477 | 0.083936 |
| SPC24    | 1.156155 | 1.084917 | 1.232069 | 7.75E-06 |
| LEMD2    | 0.998069 | 0.929042 | 1.072224 | 0.957846 |
| ALOX15   | 0.853176 | 0.801672 | 0.907989 | 5.79E-07 |
| TREML1   | 1.071886 | 1.005357 | 1.142818 | 0.033722 |
| ZNF653   | 1.077991 | 0.970551 | 1.197324 | 0.160928 |
| MED11    | 1.20672  | 1.0918   | 1.333737 | 0.000233 |
| CXCL16   | 0.994552 | 0.953864 | 1.036976 | 0.797697 |
| BCL6B    | 0.909826 | 0.855044 | 0.968118 | 0.002858 |
| ASGR2    | 1.088459 | 1.037642 | 1.141764 | 0.000511 |
| TNFSF13  | 1.15127  | 1.061343 | 1.248816 | 0.000687 |
| SENP3    | 1.038797 | 0.91966  | 1.173368 | 0.54025  |
| EIF4A1   | 1.016567 | 0.948137 | 1.089935 | 0.643994 |
| RPL26    | 0.985774 | 0.913001 | 1.064349 | 0.714235 |
| POLR3K   | 1.27743  | 1.176462 | 1.387064 | 5.60E-09 |
| SNRNP25  | 1.331383 | 1.215237 | 1.458629 | 7.96E-10 |
| WDR90    | 1.051207 | 0.975482 | 1.13281  | 0.190472 |
| JMJD8    | 1.087698 | 0.978968 | 1.208503 | 0.117726 |
| CCDC78   | 0.914283 | 0.844252 | 0.990123 | 0.027517 |
| MSLNL    | 0.882273 | 0.784293 | 0.992495 | 0.037034 |
| SPSB3    | 1.014489 | 0.856527 | 1.201581 | 0.867705 |
| CCNF     | 1.157298 | 1.086563 | 1.232637 | 5.63E-06 |
| TBC1D24  | 1.016779 | 0.942099 | 1.097379 | 0.668995 |
| AMDHD2   | 0.988336 | 0.924609 | 1.056454 | 0.730081 |
| NTN3     | 1.043144 | 0.931133 | 1.16863  | 0.466117 |
| PAQR4    | 1.062362 | 0.990779 | 1.139115 | 0.089189 |



|          |          |          |          |          |
|----------|----------|----------|----------|----------|
| FLYWCH2  | 1.200732 | 1.093188 | 1.318857 | 0.000133 |
| ZNF75A   | 1.137663 | 1.036341 | 1.248892 | 0.006728 |
| ADCY9    | 0.999822 | 0.961341 | 1.039843 | 0.992905 |
| CLPB     | 1.047445 | 0.974857 | 1.125439 | 0.205861 |
| NEU3     | 1.025816 | 0.964415 | 1.091125 | 0.4183   |
| ASRGL1   | 1.174388 | 1.102494 | 1.25097  | 6.12E-07 |
| GNG3     | 1.053291 | 0.983313 | 1.128249 | 0.138819 |
| UBXN1    | 0.91512  | 0.814993 | 1.027547 | 0.133532 |
| TTC9C    | 1.059428 | 0.9633   | 1.165148 | 0.234231 |
| TAF6L    | 0.979734 | 0.889716 | 1.078859 | 0.677138 |
| NXF1     | 0.826058 | 0.771922 | 0.883992 | 3.29E-08 |
| STX5     | 0.831738 | 0.774488 | 0.893219 | 4.12E-07 |
| SLC25A45 | 1.164496 | 1.061302 | 1.277724 | 0.001297 |
| RPL29    | 0.915329 | 0.856444 | 0.978262 | 0.009113 |
| ITIH3    | 1.079931 | 0.968324 | 1.204401 | 0.167086 |
| SYVN1    | 0.885525 | 0.81341  | 0.964034 | 0.00503  |
| ZFPL1    | 1.112115 | 0.955164 | 1.294856 | 0.171003 |
| RPS6KA4  | 0.996072 | 0.93113  | 1.065543 | 0.908904 |
| LRP5     | 0.945281 | 0.892471 | 1.001216 | 0.055044 |
| TPCN2    | 0.954852 | 0.892995 | 1.020993 | 0.176383 |
| PDZK1IP1 | 1.038222 | 0.989829 | 1.08898  | 0.123517 |
| TAL1     | 1.016962 | 0.979859 | 1.05547  | 0.375096 |
| CMPK1    | 0.920171 | 0.842254 | 1.005296 | 0.065336 |
| BEND5    | 1.028466 | 0.946712 | 1.117281 | 0.506575 |
| ZYG11B   | 1.090112 | 1.008194 | 1.178686 | 0.030411 |
| MAGOH    | 1.089233 | 0.964071 | 1.230643 | 0.169927 |
| ACOT11   | 0.979212 | 0.925034 | 1.036563 | 0.469443 |
| FAM151A  | 1.019628 | 0.935598 | 1.111204 | 0.657799 |
| PARS2    | 1.075638 | 0.984346 | 1.175398 | 0.107117 |
| USP24    | 0.948237 | 0.896372 | 1.003102 | 0.064018 |
| NOL9     | 1.069757 | 0.990104 | 1.155819 | 0.087628 |
| KLHL21   | 0.974397 | 0.918763 | 1.033399 | 0.387208 |
| ZSWIM5   | 1.221916 | 1.065914 | 1.400751 | 0.004028 |
| GMEB1    | 0.949465 | 0.870434 | 1.035672 | 0.242206 |
| JAK1     | 0.924155 | 0.857399 | 0.996109 | 0.03922  |
| RAVER2   | 0.91573  | 0.858461 | 0.97682  | 0.007546 |
| CTRC     | 1.040947 | 0.962597 | 1.125675 | 0.314823 |
| LZIC     | 1.12207  | 1.022045 | 1.231885 | 0.015619 |
| RBP7     | 0.929035 | 0.87074  | 0.991231 | 0.025991 |
| FBLIM1   | 1.037005 | 0.871052 | 1.234577 | 0.682987 |
| SLC25A34 | 1.003523 | 0.923321 | 1.090692 | 0.934042 |
| AKR7A3   | 1.115073 | 1.039796 | 1.1958   | 0.002256 |
| DHRS3    | 0.971529 | 0.92909  | 1.015908 | 0.205004 |
| MATN1    | 0.988317 | 0.891786 | 1.095297 | 0.822673 |
| LAPTM5   | 1.028639 | 0.949408 | 1.114482 | 0.489903 |
| SDC3     | 1.040555 | 0.948065 | 1.142069 | 0.402571 |
| PEF1     | 0.986152 | 0.885985 | 1.097644 | 0.798597 |
| RBBP4    | 1.070555 | 0.989996 | 1.157669 | 0.087624 |
| KIAA1522 | 0.943987 | 0.882458 | 1.009805 | 0.093694 |
| TSSK3    | 0.945564 | 0.872633 | 1.02459  | 0.171693 |
| TMCO4    | 1.048512 | 0.971961 | 1.131091 | 0.220682 |
| UBXN10   | 1.166683 | 1.088356 | 1.250648 | 1.38E-05 |
| CAMK2N1  | 1.280975 | 1.120891 | 1.463922 | 0.000277 |
| ALPL     | 1.089862 | 1.042806 | 1.139042 | 0.000133 |
| WNT4     | 0.984489 | 0.928218 | 1.044173 | 0.602674 |
| TTLL10   | 1.030343 | 0.945846 | 1.122388 | 0.493545 |
| SCNN1D   | 1.109881 | 1.025292 | 1.201449 | 0.009952 |
| MXRA8    | 1.079325 | 0.996767 | 1.168721 | 0.06008  |

|          |          |          |          |          |
|----------|----------|----------|----------|----------|
| MEGF6    | 0.943982 | 0.901864 | 0.988067 | 0.013307 |
| IL23R    | 1.18319  | 1.08119  | 1.294812 | 0.000255 |
| NFIA     | 1.13593  | 1.069369 | 1.206634 | 3.52E-05 |
| OMA1     | 1.019253 | 0.96003  | 1.082129 | 0.532379 |
| MYSM1    | 0.985269 | 0.912339 | 1.064028 | 0.705252 |
| TM2D1    | 1.15273  | 1.051982 | 1.263126 | 0.002319 |
| USP1     | 1.10786  | 1.022362 | 1.200507 | 0.012431 |
| FUBP1    | 0.951051 | 0.883142 | 1.024182 | 0.184242 |
| NEXN     | 1.143962 | 1.046551 | 1.25044  | 0.003057 |
| DNAJB4   | 1.017717 | 0.93863  | 1.103467 | 0.670483 |
| TYW3     | 1.00086  | 0.910729 | 1.099911 | 0.985757 |
| B3GALT2  | 0.991246 | 0.943317 | 1.041609 | 0.728033 |
| FAM102B  | 1.069404 | 0.993854 | 1.150698 | 0.072648 |
| GBP2     | 0.953335 | 0.899971 | 1.009863 | 0.103944 |
| ATXN7L2  | 1.08594  | 0.999079 | 1.180352 | 0.052586 |
| GBP4     | 1.015048 | 0.971961 | 1.060046 | 0.499736 |
| ZNF326   | 0.977016 | 0.909276 | 1.049801 | 0.525906 |
| GFI1     | 0.959867 | 0.912702 | 1.00947  | 0.111086 |
| AGL      | 1.073347 | 0.996845 | 1.155719 | 0.060627 |
| VCAM1    | 1.032522 | 0.965335 | 1.104386 | 0.351191 |
| EXTL2    | 1.099374 | 1.029257 | 1.174268 | 0.004839 |
| SLC30A7  | 1.004094 | 0.935163 | 1.078106 | 0.910356 |
| ZNF281   | 1.020345 | 0.944437 | 1.102355 | 0.609608 |
| ARPC5    | 1.16068  | 1.076783 | 1.251115 | 9.92E-05 |
| NLRP3    | 1.016261 | 0.967494 | 1.067488 | 0.520295 |
| ZNF496   | 0.896072 | 0.83471  | 0.961944 | 0.00243  |
| TRIM58   | 0.999869 | 0.958823 | 1.042671 | 0.995108 |
| SLAMF9   | 1.137869 | 1.05458  | 1.227735 | 0.000868 |
| KCNJ9    | 1.030123 | 0.923944 | 1.148504 | 0.59284  |
| IGSF8    | 0.977223 | 0.908943 | 1.050631 | 0.532975 |
| DDR2     | 0.966838 | 0.850377 | 1.099248 | 0.606564 |
| PEA15    | 1.090628 | 0.999904 | 1.189584 | 0.050253 |
| PEX19    | 1.2011   | 1.078105 | 1.338128 | 0.000886 |
| NCSTN    | 1.049616 | 0.957003 | 1.151191 | 0.304201 |
| VANGL2   | 1.088648 | 1.028449 | 1.152371 | 0.003428 |
| SLAMF6   | 0.966589 | 0.911109 | 1.025446 | 0.259835 |
| OLFML2B  | 1.090996 | 1.013521 | 1.174393 | 0.020486 |
| FCRLB    | 1.050239 | 0.958827 | 1.150366 | 0.291415 |
| FCGR3B   | 1.008395 | 0.971298 | 1.046909 | 0.66199  |
| KLHDC9   | 1.006984 | 0.900017 | 1.126663 | 0.903322 |
| FLVCR1   | 1.105097 | 1.020804 | 1.19635  | 0.013564 |
| ATF3     | 0.916244 | 0.867897 | 0.967285 | 0.001564 |
| RBM15    | 0.99531  | 0.926261 | 1.069506 | 0.898022 |
| DENND2D  | 1.090388 | 1.016259 | 1.169925 | 0.015999 |
| IER5     | 0.941028 | 0.87845  | 1.008065 | 0.083418 |
| SNED1    | 1.024729 | 0.947776 | 1.107931 | 0.539666 |
| BPNT1    | 1.079449 | 1.007431 | 1.156615 | 0.029997 |
| ACP6     | 1.242172 | 1.153348 | 1.337838 | 1.01E-08 |
| KIF26B   | 0.924163 | 0.878464 | 0.972239 | 0.002303 |
| TFB2M    | 0.925427 | 0.857931 | 0.998232 | 0.044883 |
| KLHDC8A  | 1.1008   | 1.033626 | 1.17234  | 0.002795 |
| PM20D1   | 1.226301 | 1.100916 | 1.365966 | 0.00021  |
| PKDCC    | 1.291296 | 1.164472 | 1.431933 | 1.25E-06 |
| OXER1    | 1.004743 | 0.93833  | 1.075856 | 0.892135 |
| HAAO     | 0.943465 | 0.880371 | 1.01108  | 0.099366 |
| B3GALNT2 | 1.10134  | 1.003962 | 1.208164 | 0.040985 |
| MAPKAPK  | 0.884656 | 0.819762 | 0.954688 | 0.001617 |
| IL24     | 0.971977 | 0.913689 | 1.033983 | 0.367681 |

|          |          |          |          |          |
|----------|----------|----------|----------|----------|
| PIGR     | 1.11165  | 0.980303 | 1.260595 | 0.098968 |
| CAPN2    | 0.998961 | 0.943979 | 1.057146 | 0.971292 |
| MRPL55   | 0.976762 | 0.875422 | 1.089833 | 0.673965 |
| WDR26    | 0.956694 | 0.894829 | 1.022835 | 0.194287 |
| REL      | 0.92176  | 0.86556  | 0.981609 | 0.011139 |
| PUS10    | 0.945619 | 0.8723   | 1.025101 | 0.17449  |
| PEX13    | 1.049068 | 0.963522 | 1.142209 | 0.269707 |
| KIAA1841 | 1.004852 | 0.920559 | 1.096863 | 0.91378  |
| TRIM17   | 1.178102 | 1.077771 | 1.287773 | 0.000307 |
| RFTN2    | 1.064725 | 0.956722 | 1.184921 | 0.250455 |
| DISC1    | 0.921476 | 0.864031 | 0.98274  | 0.01277  |
| MEMO1    | 0.916526 | 0.84814  | 0.990425 | 0.027585 |
| DPY30    | 1.089843 | 0.972574 | 1.221252 | 0.138554 |
| ARL5A    | 0.955855 | 0.881563 | 1.036408 | 0.274092 |
| DUSP19   | 1.201676 | 1.087103 | 1.328324 | 0.000326 |
| NUP35    | 1.14985  | 1.05486  | 1.253394 | 0.001504 |
| CCDC138  | 0.976657 | 0.904555 | 1.054507 | 0.546094 |
| FBXO41   | 0.952464 | 0.895445 | 1.013114 | 0.122028 |
| SMC6     | 1.050506 | 0.964327 | 1.144386 | 0.259231 |
| CCDC74A  | 1.076485 | 0.983398 | 1.178385 | 0.110229 |
| SLC16A14 | 1.274876 | 1.175537 | 1.382609 | 4.43E-09 |
| SGCB     | 1.285813 | 1.179593 | 1.401599 | 1.10E-08 |
| NOSTRIN  | 1.059672 | 0.984818 | 1.140215 | 0.120982 |
| SGPP2    | 1.069235 | 0.992547 | 1.151848 | 0.077909 |
| BBS5     | 1.159264 | 1.013381 | 1.326147 | 0.031266 |
| SMARCAD  | 0.995392 | 0.925583 | 1.070466 | 0.900926 |
| HPGDS    | 0.890678 | 0.856696 | 0.926008 | 5.44E-09 |
| PDLIM5   | 1.191128 | 1.115738 | 1.271611 | 1.58E-07 |
| RPRD2    | 0.949036 | 0.86025  | 1.046985 | 0.296592 |
| ANKRD23  | 1.182701 | 1.046448 | 1.336695 | 0.00721  |
| CTSS     | 0.951718 | 0.901516 | 1.004715 | 0.07348  |
| MSX1     | 1.134897 | 1.065868 | 1.208396 | 7.74E-05 |
| PACRGL   | 1.139168 | 1.034107 | 1.254903 | 0.008307 |
| BNIP1    | 0.994913 | 0.933055 | 1.060872 | 0.876251 |
| C1QTNF7  | 1.134326 | 1.011624 | 1.271912 | 0.030942 |
| TNFAIP8L | 1.077161 | 1.017439 | 1.14039  | 0.010649 |
| LYSMD1   | 1.287383 | 1.160128 | 1.428596 | 1.97E-06 |
| SCNM1    | 1.100314 | 0.975206 | 1.241471 | 0.120595 |
| TMOD4    | 1.077683 | 0.986044 | 1.177838 | 0.098942 |
| VPS72    | 1.115662 | 1.036121 | 1.201309 | 0.003729 |
| ERCC3    | 1.053425 | 0.965869 | 1.148918 | 0.239764 |
| RNF149   | 0.953239 | 0.892061 | 1.018612 | 0.157046 |
| IWS1     | 1.037094 | 0.939081 | 1.145338 | 0.472093 |
| BOLA3    | 1.287574 | 1.149182 | 1.442633 | 1.32E-05 |
| CDC42EP3 | 1.136305 | 1.068106 | 1.208859 | 5.20E-05 |
| S100A11  | 1.013135 | 0.972032 | 1.055976 | 0.536878 |
| DHX57    | 1.135251 | 1.035419 | 1.244708 | 0.006911 |
| ARHGAP21 | 0.909278 | 0.846906 | 0.976244 | 0.008713 |
| S100A9   | 1.012802 | 0.986069 | 1.040259 | 0.351316 |
| S100A12  | 1.006269 | 0.980484 | 1.032733 | 0.637005 |
| TGFA     | 1.05879  | 0.986177 | 1.13675  | 0.115031 |
| TDRD10   | 0.949488 | 0.855413 | 1.05391  | 0.330233 |
| CCNYL1   | 1.16439  | 1.059786 | 1.279319 | 0.00153  |
| FZD5     | 1.042591 | 0.979752 | 1.109461 | 0.188498 |
| DCAF16   | 1.044411 | 0.969938 | 1.124601 | 0.249624 |
| NPPC     | 1.032096 | 0.961343 | 1.108055 | 0.383262 |
| GNPDA2   | 0.991674 | 0.905494 | 1.086055 | 0.856951 |
| PAQR3    | 1.079335 | 0.986325 | 1.181117 | 0.096818 |

|          |          |          |          |          |
|----------|----------|----------|----------|----------|
| ANTXR2   | 0.974714 | 0.916675 | 1.036429 | 0.413564 |
| HELQ     | 1.119906 | 1.022309 | 1.226821 | 0.014924 |
| MRPS18C  | 1.298868 | 1.147326 | 1.470426 | 3.61E-05 |
| CGGBP1   | 1.139274 | 1.032704 | 1.256842 | 0.009263 |
| GPR155   | 1.090039 | 1.007537 | 1.179296 | 0.031797 |
| DAPL1    | 1.228307 | 1.138829 | 1.324815 | 9.89E-08 |
| PMVK     | 1.070799 | 0.997159 | 1.149878 | 0.059877 |
| PBXIP1   | 0.971322 | 0.907176 | 1.040003 | 0.40387  |
| PYGO2    | 1.095032 | 1.015772 | 1.180478 | 0.017876 |
| HIPK1    | 0.950629 | 0.884494 | 1.021709 | 0.168758 |
| LENEP    | 1.068475 | 0.952011 | 1.199187 | 0.260679 |
| DCST2    | 1.091727 | 1.014989 | 1.174267 | 0.018272 |
| DCST1    | 1.104821 | 1.003738 | 1.216085 | 0.041733 |
| COL6A3   | 1.062655 | 0.953574 | 1.184213 | 0.27146  |
| YY1AP1   | 0.923124 | 0.848666 | 1.004116 | 0.062288 |
| KBTBD8   | 1.149234 | 1.083892 | 1.218514 | 3.20E-06 |
| LMOD3    | 1.104898 | 0.987091 | 1.236765 | 0.082901 |
| SLC22A15 | 1.075811 | 1.034717 | 1.118538 | 0.000236 |
| ATP1A1   | 0.999812 | 0.917795 | 1.089158 | 0.996559 |
| SLC15A2  | 1.052975 | 1.002807 | 1.105653 | 0.03822  |
| EIF4E3   | 1.003256 | 0.951898 | 1.057385 | 0.903495 |
| PROK2    | 1.012701 | 0.982099 | 1.044256 | 0.420151 |
| LRRC58   | 1.021853 | 0.947539 | 1.101996 | 0.574694 |
| FSTL1    | 1.152341 | 1.067811 | 1.243563 | 0.000264 |
| ELF3     | 1.144161 | 1.033865 | 1.266224 | 0.009217 |
| TMEM183  | 0.975043 | 0.88817  | 1.070413 | 0.595541 |
| IGFBP7   | 1.07391  | 1.019653 | 1.131053 | 0.007023 |
| TRIM46   | 0.953793 | 0.893925 | 1.017671 | 0.152618 |
| KRTCAP2  | 1.13638  | 1.043716 | 1.23727  | 0.00322  |
| CXCR1    | 1.028217 | 0.98228  | 1.076303 | 0.232768 |
| ARPC2    | 1.020046 | 0.912887 | 1.139785 | 0.725971 |
| CCT3     | 1.126245 | 1.03291  | 1.228014 | 0.007069 |
| TMEM79   | 1.194367 | 1.091719 | 1.306667 | 0.000107 |
| SSR2     | 1.057346 | 0.93463  | 1.196175 | 0.375669 |
| RNF25    | 1.271583 | 1.150742 | 1.405113 | 2.41E-06 |
| STK36    | 1.154687 | 1.07321  | 1.242349 | 0.000117 |
| NEK10    | 1.009341 | 0.927086 | 1.098895 | 0.830255 |
| CCDC141  | 1.026417 | 0.94742  | 1.112001 | 0.523397 |
| FEV      | 1.020529 | 0.930525 | 1.119238 | 0.666188 |
| EOMES    | 1.015591 | 0.914643 | 1.12768  | 0.772101 |
| CWC22    | 1.018472 | 0.931315 | 1.113785 | 0.68842  |
| AZI2     | 0.8615   | 0.782276 | 0.948747 | 0.002454 |
| TGFBR2   | 0.906775 | 0.853406 | 0.963483 | 0.001567 |
| ANKZF1   | 1.068101 | 0.989219 | 1.153273 | 0.092366 |
| HDAC11   | 1.260734 | 1.124063 | 1.414023 | 7.57E-05 |
| TRAT1    | 0.871705 | 0.827198 | 0.918608 | 2.82E-07 |
| FBLN2    | 0.981148 | 0.931053 | 1.033938 | 0.476604 |
| GLB1L    | 1.036875 | 0.958219 | 1.121987 | 0.368311 |
| STT3B    | 0.994891 | 0.927589 | 1.067076 | 0.886029 |
| CHCHD4   | 1.100432 | 1.020811 | 1.186262 | 0.012508 |
| FCRL1    | 1.000795 | 0.95411  | 1.049765 | 0.973992 |
| SERPINI1 | 1.204777 | 1.139291 | 1.274026 | 6.44E-11 |
| CLASP2   | 1.024926 | 0.959381 | 1.094949 | 0.46529  |
| SUCLG1   | 1.078218 | 0.959551 | 1.21156  | 0.205547 |
| NUAK2    | 1.008378 | 0.956986 | 1.062529 | 0.754591 |
| SPTA1    | 1.012315 | 0.978696 | 1.047089 | 0.477526 |
| PRKCI    | 0.955605 | 0.885975 | 1.030707 | 0.239422 |
| MNDA     | 0.961587 | 0.926663 | 0.997827 | 0.037969 |

|          |          |          |          |          |
|----------|----------|----------|----------|----------|
| PYHIN1   | 0.897497 | 0.845456 | 0.952742 | 0.000388 |
| IFI16    | 0.978896 | 0.914703 | 1.047593 | 0.537645 |
| AIM2     | 1.100275 | 1.021804 | 1.184772 | 0.011363 |
| EFHB     | 1.146378 | 0.932348 | 1.409541 | 0.19511  |
| EIF5A2   | 1.101203 | 1.018434 | 1.190699 | 0.0156   |
| RPL22L1  | 0.987991 | 0.909405 | 1.073367 | 0.775106 |
| PPM1L    | 1.080872 | 1.009113 | 1.157733 | 0.026501 |
| ICA1L    | 1.028404 | 0.950197 | 1.113047 | 0.487654 |
| CTLA4    | 1.07325  | 1.002276 | 1.149249 | 0.042857 |
| ICOS     | 1.022412 | 0.97091  | 1.076645 | 0.400629 |
| RYBP     | 0.944531 | 0.878631 | 1.015374 | 0.121982 |
| PPP4R2   | 0.927384 | 0.862168 | 0.997532 | 0.042724 |
| CD200R1  | 0.975524 | 0.898266 | 1.059427 | 0.556098 |
| GTPBP8   | 1.193934 | 1.079301 | 1.320741 | 0.000578 |
| WDFY3    | 1.007063 | 0.963251 | 1.052869 | 0.756451 |
| COX18    | 1.014556 | 0.928731 | 1.108312 | 0.748631 |
| PTPN13   | 1.01553  | 0.928107 | 1.111188 | 0.737218 |
| THOC7    | 1.07405  | 0.961566 | 1.199693 | 0.205651 |
| ATXN7    | 0.941927 | 0.872599 | 1.016764 | 0.125092 |
| PSMD6    | 0.9649   | 0.876334 | 1.062416 | 0.466982 |
| ADAMTS9  | 1.142001 | 1.016783 | 1.282639 | 0.025036 |
| PPM1K    | 1.072397 | 0.999611 | 1.150483 | 0.05128  |
| GMPS     | 1.006295 | 0.91374  | 1.108224 | 0.898569 |
| TIPARP   | 0.938101 | 0.881046 | 0.998851 | 0.045948 |
| CCNL1    | 0.950841 | 0.893294 | 1.012095 | 0.113528 |
| PTX3     | 0.914291 | 0.876512 | 0.953698 | 3.16E-05 |
| HESX1    | 0.943615 | 0.87524  | 1.017331 | 0.130474 |
| SLMAP    | 0.960185 | 0.896744 | 1.028114 | 0.24403  |
| RPL9     | 0.867042 | 0.799071 | 0.940796 | 0.000614 |
| RPP14    | 0.962792 | 0.886676 | 1.045442 | 0.366856 |
| ABHD6    | 1.21087  | 1.111446 | 1.319187 | 1.20E-05 |
| DNASE1L3 | 0.978971 | 0.868247 | 1.103816 | 0.728555 |
| RBM47    | 1.032669 | 0.988027 | 1.079327 | 0.153941 |
| APBB2    | 1.240856 | 1.156587 | 1.331265 | 1.81E-09 |
| IL17RE   | 1.009176 | 0.962213 | 1.058431 | 0.707157 |
| IL17RC   | 1.110034 | 1.02885  | 1.197624 | 0.007061 |
| CRELD1   | 1.046552 | 0.930387 | 1.177222 | 0.448462 |
| PRRT3    | 0.955591 | 0.888075 | 1.02824  | 0.224348 |
| PCOLCE2  | 1.135966 | 1.057826 | 1.219879 | 0.000455 |
| MTMR14   | 0.977791 | 0.901194 | 1.060898 | 0.589464 |
| TTC14    | 1.100258 | 1.030797 | 1.174401 | 0.004084 |
| CXCL3    | 1.099376 | 1.053879 | 1.146837 | 1.12E-05 |
| CXCL5    | 1.154477 | 1.067245 | 1.248839 | 0.000339 |
| PPBP     | 1.059068 | 1.027829 | 1.091257 | 0.000172 |
| PF4      | 1.077346 | 1.043943 | 1.111818 | 3.55E-06 |
| MTHFD2L  | 1.068215 | 0.982241 | 1.161715 | 0.123216 |
| CXCL1    | 1.119546 | 1.068611 | 1.172908 | 2.00E-06 |
| RCHY1    | 1.075711 | 0.987758 | 1.171495 | 0.093556 |
| CPA3     | 0.892556 | 0.866601 | 0.919288 | 4.38E-14 |
| GYG1     | 0.969839 | 0.899922 | 1.045189 | 0.422428 |
| HPS3     | 1.053773 | 0.977471 | 1.136032 | 0.17201  |
| TOPBP1   | 1.002225 | 0.929804 | 1.080287 | 0.953677 |
| RYK      | 0.867901 | 0.812769 | 0.926773 | 2.33E-05 |
| SNRK     | 0.94919  | 0.885445 | 1.017525 | 0.141517 |
| TCF23    | 1.077052 | 0.989739 | 1.172069 | 0.08528  |
| UCN      | 1.119284 | 1.038667 | 1.206157 | 0.00313  |
| ZNF513   | 0.936474 | 0.8634   | 1.015733 | 0.113338 |
| SLC4A1AP | 1.03676  | 0.928293 | 1.1579   | 0.521996 |

|          |          |          |          |          |
|----------|----------|----------|----------|----------|
| PLB1     | 1.028131 | 0.956027 | 1.105673 | 0.454573 |
| SPDYA    | 0.967386 | 0.895521 | 1.045018 | 0.399841 |
| KIAA1143 | 1.016094 | 0.922107 | 1.119661 | 0.747146 |
| KIF15    | 1.110568 | 1.041916 | 1.183744 | 0.001277 |
| TGM4     | 0.95337  | 0.870804 | 1.043766 | 0.301525 |
| WDR43    | 0.997518 | 0.918699 | 1.083098 | 0.952806 |
| ZDHHC3   | 1.021625 | 0.920445 | 1.133928 | 0.687632 |
| CDCP1    | 1.197568 | 1.130793 | 1.268286 | 7.32E-10 |
| CLEC3B   | 1.177147 | 1.036049 | 1.33746  | 0.012294 |
| LZTFL1   | 1.110553 | 1.006573 | 1.225273 | 0.036565 |
| FYCO1    | 0.947387 | 0.885903 | 1.013139 | 0.11441  |
| CCR1     | 1.105941 | 1.063581 | 1.149988 | 4.34E-07 |
| LRRC2    | 1.237167 | 1.108673 | 1.380553 | 0.000142 |
| FBXO40   | 1.041586 | 0.913629 | 1.187464 | 0.542355 |
| DTX3L    | 1.053074 | 0.986881 | 1.123706 | 0.118458 |
| ZNF148   | 1.019909 | 0.946081 | 1.099499 | 0.607107 |
| NMNAT3   | 1.163016 | 1.081012 | 1.251241 | 5.17E-05 |
| ZMYM6    | 1.050907 | 0.955965 | 1.155279 | 0.304047 |
| YEATS2   | 0.929767 | 0.860228 | 1.004927 | 0.066351 |
| ZC3H12A  | 0.989566 | 0.931307 | 1.051469 | 0.734753 |
| MEAF6    | 1.036168 | 0.919569 | 1.167551 | 0.559684 |
| SNIP1    | 0.946424 | 0.879443 | 1.018507 | 0.141474 |
| DNALI1   | 1.042847 | 0.926768 | 1.173465 | 0.485915 |
| POLR2H   | 1.319917 | 1.19136  | 1.462347 | 1.10E-07 |
| LIPH     | 1.207837 | 1.126724 | 1.294789 | 1.02E-07 |
| TMEM41A  | 1.068723 | 0.983725 | 1.161066 | 0.115976 |
| RPN1     | 1.018864 | 0.92682  | 1.12005  | 0.698864 |
| SENP2    | 0.953238 | 0.881705 | 1.030574 | 0.228865 |
| HEYL     | 1.343036 | 1.208773 | 1.492212 | 4.06E-08 |
| IFT122   | 0.968557 | 0.896212 | 1.046741 | 0.419891 |
| RFC4     | 1.168324 | 1.063304 | 1.283718 | 0.001207 |
| RPL39L   | 0.961857 | 0.899672 | 1.028341 | 0.254107 |
| BAP1     | 0.994838 | 0.911815 | 1.085421 | 0.907335 |
| TKT      | 0.853743 | 0.795231 | 0.91656  | 1.27E-05 |
| PRKCD    | 1.148542 | 1.068242 | 1.234879 | 0.00018  |
| RFT1     | 1.163796 | 1.074616 | 1.260376 | 0.000192 |
| SFMBT1   | 1.050752 | 0.986127 | 1.119612 | 0.12636  |
| GNL3     | 1.090932 | 0.996483 | 1.194333 | 0.059605 |
| PBRM1    | 1.045645 | 0.964755 | 1.133318 | 0.27725  |
| ARHGEF3  | 1.119259 | 1.048231 | 1.195099 | 0.000757 |
| SLBP     | 0.955928 | 0.871975 | 1.047964 | 0.336531 |
| LRPAP1   | 1.119921 | 1.018751 | 1.231138 | 0.019051 |
| ZDHHC19  | 1.143793 | 1.064666 | 1.228801 | 0.00024  |
| UBXN7    | 0.921068 | 0.866136 | 0.979483 | 0.008774 |
| RNF168   | 1.102972 | 1.022311 | 1.189997 | 0.011424 |
| PIGX     | 1.124479 | 1.009222 | 1.252898 | 0.033475 |
| S100P    | 0.923096 | 0.894653 | 0.952444 | 5.41E-07 |
| CLDN19   | 0.856295 | 0.778926 | 0.941349 | 0.001323 |
| ERMAP    | 1.060149 | 0.989516 | 1.135824 | 0.096842 |
| ZNF691   | 1.154381 | 1.061217 | 1.255725 | 0.000826 |
| SGMS2    | 1.073463 | 1.013168 | 1.137345 | 0.016238 |
| METAP1   | 0.996103 | 0.913681 | 1.085961 | 0.929397 |
| DNAJB14  | 0.992379 | 0.92268  | 1.067342 | 0.836861 |
| EMCN     | 1.170283 | 0.952045 | 1.438548 | 0.135364 |
| BDH2     | 1.120849 | 1.01087  | 1.242795 | 0.030377 |
| PGRMC2   | 1.202454 | 1.094538 | 1.32101  | 0.000122 |
| CDC25A   | 1.108084 | 1.0363   | 1.184841 | 0.00267  |
| CAMP     | 1.015381 | 0.98783  | 1.0437   | 0.276807 |

|          |          |          |          |          |
|----------|----------|----------|----------|----------|
| ZNF589   | 1.065757 | 0.987029 | 1.150765 | 0.103839 |
| PLXNB1   | 1.035716 | 0.982595 | 1.091709 | 0.19143  |
| CCDC51   | 1.222047 | 1.113673 | 1.340967 | 2.31E-05 |
| ATRIP    | 1.180351 | 1.063428 | 1.31013  | 0.001837 |
| SHISA5   | 1.110824 | 1.015274 | 1.215366 | 0.022004 |
| SPRY1    | 0.965769 | 0.926094 | 1.007144 | 0.103659 |
| APEH     | 1.121789 | 1.036417 | 1.214193 | 0.004432 |
| INTU     | 1.188385 | 1.079369 | 1.308413 | 0.000439 |
| RNF123   | 1.078414 | 1.00633  | 1.155661 | 0.032458 |
| HSPA4L   | 1.123545 | 1.007557 | 1.252886 | 0.036136 |
| MFSD8    | 1.004894 | 0.9296   | 1.086287 | 0.902215 |
| CAMKV    | 1.115679 | 1.028293 | 1.210492 | 0.008528 |
| MON1A    | 1.270501 | 1.152122 | 1.401043 | 1.61E-06 |
| MST1R    | 1.206164 | 1.069546 | 1.360233 | 0.002242 |
| RAD54L2  | 1.024763 | 0.955281 | 1.0993   | 0.494704 |
| TEX264   | 1.190296 | 1.081683 | 1.309815 | 0.000359 |
| GRM2     | 1.403534 | 1.262837 | 1.559907 | 3.18E-10 |
| DUSP7    | 1.302156 | 1.224849 | 1.384342 | 2.79E-17 |
| PPM1M    | 1.09731  | 1.021797 | 1.178403 | 0.010689 |
| WDR82    | 1.03814  | 0.959662 | 1.123035 | 0.350657 |
| NDST3    | 0.977368 | 0.905829 | 1.054557 | 0.555012 |
| HMGB2    | 0.939328 | 0.867958 | 1.016566 | 0.120556 |
| SAP30    | 0.871863 | 0.828645 | 0.917334 | 1.25E-07 |
| SCRG1    | 0.953356 | 0.876431 | 1.037031 | 0.265778 |
| MAD2L1   | 1.129831 | 1.038308 | 1.229421 | 0.004623 |
| ANXA5    | 1.014642 | 0.979538 | 1.051003 | 0.418449 |
| MAP9     | 1.31633  | 1.179057 | 1.469584 | 1.00E-06 |
| FBXO8    | 0.990751 | 0.90801  | 1.081032 | 0.834572 |
| HPGD     | 0.952907 | 0.900654 | 1.008193 | 0.09366  |
| TMEM144  | 1.177201 | 1.082769 | 1.279869 | 0.000131 |
| IL15     | 1.192959 | 1.097758 | 1.296416 | 3.21E-05 |
| FAM160A1 | 0.939757 | 0.815781 | 1.082575 | 0.389359 |
| ARFIP1   | 1.108718 | 1.032047 | 1.191084 | 0.004761 |
| HHIP     | 1.133512 | 1.005569 | 1.277734 | 0.040282 |
| ANAPC10  | 0.958301 | 0.869028 | 1.056745 | 0.393265 |
| ABCE1    | 1.022929 | 0.943994 | 1.108464 | 0.580065 |
| OTUD4    | 0.929234 | 0.86545  | 0.99772  | 0.043086 |
| LSM6     | 1.21123  | 1.084886 | 1.352288 | 0.000651 |
| TMEM184A | 1.145773 | 1.043841 | 1.257659 | 0.004202 |
| ITGA2    | 1.219579 | 1.125427 | 1.321606 | 1.28E-06 |
| MOCS2    | 1.046149 | 0.949484 | 1.152656 | 0.36174  |
| EDIL3    | 1.020924 | 0.966193 | 1.078757 | 0.461355 |
| TMEM161A | 1.117226 | 1.027622 | 1.214642 | 0.009356 |
| ELOVL7   | 1.103655 | 1.040471 | 1.170676 | 0.001042 |
| NDUFAF2  | 1.197571 | 1.054659 | 1.359848 | 0.005423 |
| LMBRD2   | 1.122185 | 1.034891 | 1.216842 | 0.00527  |
| NIPBL    | 0.964149 | 0.903216 | 1.029193 | 0.27304  |
| SLC25A46 | 1.087911 | 0.995851 | 1.188483 | 0.06179  |
| STARD4   | 1.134286 | 1.071588 | 1.200653 | 1.40E-05 |
| PGGT1B   | 1.056916 | 0.977668 | 1.142589 | 0.163918 |
| F2RL2    | 1.017033 | 0.957641 | 1.080109 | 0.582222 |
| CCDC112  | 1.045974 | 0.971465 | 1.126197 | 0.233207 |
| CMBL     | 0.960069 | 0.905127 | 1.018345 | 0.175311 |
| PRRC1    | 1.050337 | 0.967091 | 1.14075  | 0.243735 |
| F2RL1    | 1.059324 | 0.996392 | 1.126231 | 0.065141 |
| AGGF1    | 1.094016 | 0.987571 | 1.211936 | 0.085345 |
| WDR41    | 1.023504 | 0.93961  | 1.114889 | 0.594428 |
| NDUFS4   | 0.900858 | 0.812763 | 0.998501 | 0.046752 |

|          |          |          |          |          |
|----------|----------|----------|----------|----------|
| SPINK1   | 1.085292 | 0.974017 | 1.20928  | 0.138081 |
| GRPEL2   | 1.261633 | 1.171568 | 1.358622 | 7.74E-10 |
| ARSK     | 1.214248 | 1.08575  | 1.357954 | 0.00067  |
| RHOBTB3  | 0.988509 | 0.938114 | 1.041611 | 0.665085 |
| TIGD6    | 1.298019 | 1.144543 | 1.472077 | 4.85E-05 |
| SERINC5  | 0.890732 | 0.842104 | 0.942167 | 5.35E-05 |
| CAGE1    | 1.073122 | 0.935582 | 1.230883 | 0.313234 |
| CASP3    | 0.923066 | 0.864702 | 0.98537  | 0.016297 |
| ERAP1    | 0.982225 | 0.910865 | 1.059176 | 0.641192 |
| ERAP2    | 0.949534 | 0.89349  | 1.009093 | 0.095246 |
| CMYA5    | 1.158171 | 1.026188 | 1.307129 | 0.017372 |
| RICTOR   | 0.961557 | 0.911524 | 1.014337 | 0.150476 |
| EBF1     | 1.040762 | 0.980212 | 1.105054 | 0.191408 |
| ANKRA2   | 1.112124 | 1.006973 | 1.228255 | 0.035986 |
| UBLCP1   | 1.103248 | 1.011092 | 1.203803 | 0.027256 |
| UTP15    | 1.103277 | 1.004537 | 1.211722 | 0.039918 |
| TLR3     | 1.104461 | 0.958849 | 1.272185 | 0.168385 |
| NSA2     | 0.92343  | 0.847747 | 1.00587  | 0.067877 |
| GFM2     | 1.040611 | 0.955415 | 1.133405 | 0.36102  |
| TERT     | 1.17373  | 1.08485  | 1.269892 | 6.69E-05 |
| CCDC127  | 1.083516 | 0.957741 | 1.225808 | 0.202623 |
| ACSL6    | 1.07705  | 0.995164 | 1.165674 | 0.065796 |
| IL3      | 1.531834 | 1.248294 | 1.879779 | 4.44E-05 |
| CSF2     | 1.220689 | 1.137549 | 1.309905 | 3.01E-08 |
| SHROOM1  | 1.163832 | 1.057401 | 1.280977 | 0.001931 |
| GDF9     | 0.986571 | 0.908908 | 1.070871 | 0.746562 |
| UQCRQ    | 1.202094 | 1.082316 | 1.335127 | 0.000588 |
| LEAP2    | 0.992645 | 0.940532 | 1.047646 | 0.788468 |
| GJB7     | 1.001543 | 0.922301 | 1.087592 | 0.970761 |
| SLC35A1  | 1.061811 | 0.973743 | 1.157845 | 0.174575 |
| TXLNB    | 0.981928 | 0.880751 | 1.094728 | 0.742378 |
| CITED2   | 0.888868 | 0.833975 | 0.947374 | 0.000292 |
| DCBLD1   | 1.256499 | 1.161257 | 1.359553 | 1.37E-08 |
| SFXN1    | 1.197945 | 1.120647 | 1.280574 | 1.11E-07 |
| SAMD3    | 1.022697 | 0.914605 | 1.143564 | 0.693741 |
| PDSS2    | 1.116578 | 1.034831 | 1.204782 | 0.004475 |
| STXBP5   | 0.928104 | 0.881638 | 0.97702  | 0.004412 |
| IL31RA   | 1.028995 | 0.974719 | 1.086294 | 0.301221 |
| ANKRD55  | 0.955225 | 0.868395 | 1.050736 | 0.346132 |
| PI16     | 1.018655 | 0.910049 | 1.140223 | 0.747957 |
| DAGLB    | 0.844211 | 0.790014 | 0.902126 | 5.66E-07 |
| KIAA0895 | 1.076668 | 0.99303  | 1.167349 | 0.073382 |
| STK17A   | 0.947105 | 0.881451 | 1.017648 | 0.138161 |
| TRA2A    | 0.92301  | 0.859807 | 0.99086  | 0.02685  |
| GALNT10  | 1.031906 | 0.955562 | 1.114348 | 0.423204 |
| SAP30L   | 0.970855 | 0.901854 | 1.045136 | 0.431676 |
| RPS14    | 0.913998 | 0.845945 | 0.987525 | 0.022729 |
| MYOZ3    | 0.956242 | 0.863139 | 1.059387 | 0.391927 |
| COG5     | 0.964641 | 0.899641 | 1.034337 | 0.311808 |
| GPR85    | 1.269405 | 1.140175 | 1.413283 | 1.33E-05 |
| SLU7     | 0.91411  | 0.830119 | 1.0066   | 0.06782  |
| RP9      | 1.013671 | 0.917338 | 1.12012  | 0.789849 |
| PTTG1    | 1.259237 | 1.155002 | 1.372879 | 1.71E-07 |
| CAMLG    | 0.947967 | 0.860908 | 1.043829 | 0.276946 |
| RELL2    | 1.086738 | 1.011591 | 1.167467 | 0.022894 |
| KCNK5    | 1.075252 | 1.027629 | 1.125082 | 0.001694 |
| ZNF12    | 0.960059 | 0.895621 | 1.029133 | 0.250197 |
| SLC29A4  | 1.023507 | 0.938938 | 1.115693 | 0.597469 |



|          |          |          |          |          |
|----------|----------|----------|----------|----------|
| CDCA7L   | 0.891365 | 0.838374 | 0.947704 | 0.000235 |
| SP8      | 1.09117  | 1.008076 | 1.181112 | 0.030849 |
| MIOS     | 0.999082 | 0.9173   | 1.088156 | 0.983191 |
| USP49    | 1.079361 | 1.004101 | 1.160262 | 0.038364 |
| SYTL3    | 0.941124 | 0.89174  | 0.993242 | 0.027345 |
| ZNF704   | 0.832731 | 0.783119 | 0.885486 | 5.20E-09 |
| FABP5    | 0.989781 | 0.912932 | 1.073099 | 0.803286 |
| TAGAP    | 1.028357 | 0.959886 | 1.101711 | 0.426385 |
| COL1A2   | 1.108469 | 1.031045 | 1.191706 | 0.005311 |
| SLC13A4  | 1.030128 | 0.945207 | 1.122678 | 0.498905 |
| BRI3     | 0.848103 | 0.779026 | 0.923305 | 0.000144 |
| LMTK2    | 0.957043 | 0.900755 | 1.016849 | 0.155697 |
| CTSB     | 1.037761 | 0.966272 | 1.114539 | 0.308767 |
| DLC1     | 0.967058 | 0.923477 | 1.012696 | 0.154519 |
| ADCY1    | 1.169481 | 1.043114 | 1.311157 | 0.007287 |
| RAD21    | 0.950616 | 0.878046 | 1.029183 | 0.211304 |
| MED30    | 0.855121 | 0.777656 | 0.940302 | 0.001236 |
| PHKG1    | 0.9302   | 0.88107  | 0.982069 | 0.008961 |
| DEFA4    | 1.009481 | 0.987042 | 1.032429 | 0.41065  |
| OSGIN2   | 0.909065 | 0.836392 | 0.988051 | 0.024914 |
| DEFB1    | 1.015047 | 0.983585 | 1.047514 | 0.35254  |
| OXR1     | 0.962834 | 0.89199  | 1.039304 | 0.331394 |
| GPR146   | 1.139599 | 1.040556 | 1.248069 | 0.004848 |
| UNCX     | 0.928223 | 0.868455 | 0.992105 | 0.02828  |
| TMEM184  | 0.975345 | 0.919358 | 1.034741 | 0.407851 |
| NOS3     | 1.134785 | 0.970057 | 1.327486 | 0.11409  |
| MICALL2  | 0.897655 | 0.846927 | 0.951421 | 0.000275 |
| CA3      | 1.163991 | 1.093423 | 1.239114 | 1.95E-06 |
| INTS1    | 1.033027 | 0.961462 | 1.109919 | 0.375048 |
| CDK5     | 0.999312 | 0.923322 | 1.081556 | 0.986391 |
| SLC4A2   | 1.00282  | 0.932215 | 1.078773 | 0.939738 |
| FASTK    | 1.071015 | 0.983947 | 1.165787 | 0.112764 |
| TMUB1    | 0.87549  | 0.797861 | 0.960671 | 0.005002 |
| PHAX     | 1.119606 | 1.018825 | 1.230356 | 0.018901 |
| ALDH7A1  | 1.011906 | 0.900225 | 1.137443 | 0.842761 |
| FOXK1    | 0.975953 | 0.916072 | 1.039749 | 0.451198 |
| COX6C    | 1.177972 | 1.058904 | 1.310429 | 0.00259  |
| OSR2     | 1.189606 | 1.076087 | 1.315101 | 0.000691 |
| YWHAZ    | 0.972533 | 0.882741 | 1.071458 | 0.573092 |
| BAALC    | 0.936869 | 0.904939 | 0.969925 | 0.000228 |
| FZD6     | 1.144701 | 1.0859   | 1.206686 | 5.09E-07 |
| CTHRC1   | 1.096563 | 1.022395 | 1.176111 | 0.009885 |
| SLC25A32 | 1.063328 | 0.936193 | 1.207728 | 0.344595 |
| TP53INP1 | 0.971968 | 0.92392  | 1.022515 | 0.271684 |
| INTS8    | 0.987245 | 0.912818 | 1.067739 | 0.748203 |
| FREM1    | 1.049377 | 0.997766 | 1.103658 | 0.061064 |
| GEM      | 1.197603 | 1.118157 | 1.282693 | 2.62E-07 |
| TMEM67   | 1.23572  | 1.133753 | 1.346858 | 1.46E-06 |
| SNAPC3   | 1.050386 | 0.975157 | 1.131419 | 0.194809 |
| NUDT2    | 0.959196 | 0.864394 | 1.064396 | 0.432686 |
| TMEM65   | 1.142914 | 1.070146 | 1.220631 | 6.90E-05 |
| PSIP1    | 1.023027 | 0.934379 | 1.120087 | 0.622516 |
| UBAP1    | 0.908049 | 0.843083 | 0.978022 | 0.010874 |
| SYK      | 1.058668 | 0.98786  | 1.134552 | 0.106494 |
| NIPSNAP3 | 1.062555 | 0.975928 | 1.156872 | 0.161994 |
| ABCA1    | 1.030403 | 0.98492  | 1.077985 | 0.193503 |
| NFIL3    | 1.026559 | 0.965238 | 1.091776 | 0.404214 |
| LETM2    | 0.99029  | 0.911378 | 1.076035 | 0.817857 |

|          |          |          |          |          |
|----------|----------|----------|----------|----------|
| METTL2B  | 1.048854 | 0.95674  | 1.149837 | 0.309145 |
| FXN      | 1.045529 | 0.958504 | 1.140454 | 0.315316 |
| TMEM71   | 0.974914 | 0.920452 | 1.032597 | 0.386349 |
| MAMDC2   | 0.929763 | 0.896263 | 0.964516 | 0.0001   |
| CPA6     | 0.929943 | 0.844708 | 1.02378  | 0.138655 |
| ALDH1A1  | 1.146654 | 1.108082 | 1.186569 | 4.56E-15 |
| KDM1B    | 1.040581 | 0.966479 | 1.120366 | 0.291254 |
| HGSNAT   | 0.931753 | 0.8632   | 1.00575  | 0.069844 |
| GKAP1    | 1.06189  | 0.970131 | 1.162328 | 0.192809 |
| KIF27    | 1.017382 | 0.914158 | 1.132262 | 0.752222 |
| HNRNPK   | 0.999226 | 0.906138 | 1.101877 | 0.987616 |
| TRPV6    | 1.188734 | 1.024176 | 1.379732 | 0.022954 |
| ANKS6    | 1.229077 | 1.137835 | 1.327634 | 1.60E-07 |
| FBP1     | 1.03648  | 0.99563  | 1.079007 | 0.080729 |
| ZHX1     | 0.949602 | 0.873796 | 1.031984 | 0.223119 |
| CYBB     | 0.998216 | 0.964951 | 1.032628 | 0.917762 |
| DYNLT3   | 1.103675 | 1.020599 | 1.193513 | 0.013487 |
| MID1IP1  | 0.917018 | 0.857442 | 0.980734 | 0.011485 |
| NCF1C    | 1.058017 | 1.010697 | 1.107552 | 0.015703 |
| KIAA1958 | 0.878666 | 0.822276 | 0.938923 | 0.000132 |
| PCDH19   | 1.187322 | 1.107051 | 1.273413 | 1.53E-06 |
| PIGA     | 0.895217 | 0.840781 | 0.953178 | 0.000544 |
| OR1K1    | 1.06379  | 0.930488 | 1.21619  | 0.365325 |
| STRBP    | 0.976076 | 0.903227 | 1.0548   | 0.540628 |
| CLDN3    | 1.294146 | 1.18578  | 1.412416 | 7.51E-09 |
| GAPVD1   | 0.965702 | 0.903734 | 1.03192  | 0.30236  |
| ATP7A    | 1.023842 | 0.955322 | 1.097277 | 0.504964 |
| ZNF367   | 1.124162 | 1.047798 | 1.206091 | 0.001111 |
| HDX      | 1.076052 | 0.972321 | 1.190851 | 0.156413 |
| NDUFB6   | 1.117218 | 1.009326 | 1.236643 | 0.032426 |
| NOL6     | 1.173603 | 1.081087 | 1.274036 | 0.000133 |
| AQP3     | 1.05565  | 0.998389 | 1.116194 | 0.056999 |
| VCP      | 0.971426 | 0.889954 | 1.060358 | 0.516567 |
| PIGO     | 1.005711 | 0.918376 | 1.10135  | 0.902219 |
| STOML2   | 1.148436 | 1.034541 | 1.27487  | 0.009399 |
| BRWD3    | 0.965301 | 0.89787  | 1.037796 | 0.339148 |
| SLITRK5  | 1.31994  | 1.223685 | 1.423767 | 6.71E-13 |
| MELK     | 1.137347 | 1.062609 | 1.217343 | 0.000206 |
| OTUD1    | 0.941856 | 0.881902 | 1.005887 | 0.074254 |
| ARHGAP11 | 0.975839 | 0.919026 | 1.036163 | 0.42419  |
| HECTD2   | 1.150598 | 1.01846  | 1.29988  | 0.024206 |
| SLC7A3   | 1.236497 | 1.136702 | 1.345053 | 7.64E-07 |
| FBXO33   | 0.995211 | 0.915779 | 1.081534 | 0.909949 |
| LRRRC18  | 1.024775 | 0.968255 | 1.084594 | 0.397849 |
| WRN      | 1.015037 | 0.950433 | 1.084033 | 0.656453 |
| TSHR     | 0.929422 | 0.830929 | 1.039589 | 0.20032  |
| CFL2     | 1.021657 | 0.941504 | 1.108635 | 0.607261 |
| SUGT1    | 1.067129 | 0.974189 | 1.168936 | 0.162264 |
| GTF2A1   | 1.070499 | 0.992661 | 1.15444  | 0.076942 |
| ZCCHC24  | 1.083121 | 1.020154 | 1.149974 | 0.008977 |
| PGM2L1   | 1.004975 | 0.930165 | 1.085801 | 0.899938 |
| SLC16A9  | 1.139612 | 1.064726 | 1.219764 | 0.000164 |
| FOLR2    | 1.124512 | 1.05208  | 1.201931 | 0.000551 |
| INPPL1   | 0.997735 | 0.925324 | 1.075812 | 0.952959 |
| PHOX2A   | 1.039165 | 0.94008  | 1.148693 | 0.452407 |
| GJB2     | 1.064432 | 0.945367 | 1.198494 | 0.302216 |
| CRYL1    | 1.12243  | 1.024548 | 1.229662 | 0.013105 |
| REEP3    | 1.06831  | 1.015112 | 1.124295 | 0.011229 |

|          |          |          |          |          |
|----------|----------|----------|----------|----------|
| PCF11    | 0.966306 | 0.912977 | 1.02275  | 0.236675 |
| RPL10L   | 0.801425 | 0.686597 | 0.935457 | 0.005023 |
| RPL36AL  | 0.982783 | 0.922131 | 1.047424 | 0.593091 |
| ZNF22    | 1.042865 | 0.965342 | 1.126614 | 0.286893 |
| KLHDC2   | 0.992692 | 0.90703  | 1.086444 | 0.873434 |
| RPUSD4   | 1.056541 | 0.966404 | 1.155085 | 0.226714 |
| ARF6     | 1.006121 | 0.9075   | 1.11546  | 0.907705 |
| TTC8     | 1.11523  | 1.036782 | 1.199614 | 0.003383 |
| TMEM63C  | 1.283818 | 1.165998 | 1.413544 | 3.64E-07 |
| AKR1E2   | 1.020364 | 0.965235 | 1.078642 | 0.476855 |
| KBTBD6   | 1.077752 | 0.990725 | 1.172424 | 0.081324 |
| FAAH2    | 1.053016 | 0.967274 | 1.146358 | 0.233214 |
| NUDT5    | 0.983678 | 0.901497 | 1.073351 | 0.711599 |
| DACT1    | 1.149915 | 1.060957 | 1.246332 | 0.000673 |
| PRPF18   | 1.286114 | 1.14509  | 1.444506 | 2.17E-05 |
| TAF3     | 1.203686 | 1.068474 | 1.356008 | 0.002293 |
| VDAC2    | 0.944481 | 0.850029 | 1.04943  | 0.288008 |
| COMTD1   | 1.236921 | 1.12108  | 1.364731 | 2.25E-05 |
| SLC18A2  | 0.936771 | 0.877922 | 0.999565 | 0.048483 |
| PDZD8    | 0.986208 | 0.935826 | 1.039303 | 0.603705 |
| ZNF503   | 1.09539  | 1.048859 | 1.143985 | 3.89E-05 |
| QSOX2    | 0.950444 | 0.888823 | 1.016336 | 0.137238 |
| NSD1     | 1.041259 | 0.969095 | 1.118796 | 0.269896 |
| PRDX3    | 1.1351   | 1.055538 | 1.220659 | 0.000631 |
| ENOX2    | 1.140143 | 1.060838 | 1.225376 | 0.000363 |
| GHITM    | 1.142812 | 1.018205 | 1.282668 | 0.023436 |
| CLEC1B   | 1.003428 | 0.944452 | 1.066087 | 0.911832 |
| SNAPC4   | 1.052747 | 0.966214 | 1.14703  | 0.240157 |
| PMPCA    | 1.011593 | 0.930801 | 1.099398 | 0.786069 |
| TSC1     | 1.040533 | 0.958592 | 1.129478 | 0.342402 |
| GFI1B    | 1.066695 | 1.018083 | 1.117628 | 0.006667 |
| HPRT1    | 1.180751 | 1.069422 | 1.30367  | 0.001008 |
| ZMYND19  | 1.073936 | 0.986792 | 1.168775 | 0.098527 |
| STOX1    | 1.281874 | 1.140523 | 1.440743 | 3.10E-05 |
| RET      | 1.039039 | 0.980654 | 1.100901 | 0.194327 |
| DDX21    | 0.922281 | 0.854639 | 0.995278 | 0.037364 |
| BMS1     | 0.986962 | 0.902959 | 1.07878  | 0.772459 |
| STK32C   | 1.201142 | 1.114585 | 1.294421 | 1.56E-06 |
| FUNDC2   | 1.002822 | 0.873433 | 1.151379 | 0.968104 |
| NDRG2    | 1.168371 | 1.097764 | 1.243519 | 9.94E-07 |
| ZNF219   | 0.819641 | 0.769513 | 0.873033 | 6.53E-10 |
| CASP7    | 0.895524 | 0.827662 | 0.968949 | 0.006061 |
| METTL3   | 0.993997 | 0.926976 | 1.065863 | 0.865751 |
| SALL2    | 1.042802 | 0.977926 | 1.111982 | 0.200947 |
| PRAP1    | 1.1003   | 0.990462 | 1.222318 | 0.074855 |
| TRUB1    | 1.134945 | 1.034081 | 1.245646 | 0.007682 |
| ZFYVE1   | 0.971775 | 0.899842 | 1.049458 | 0.465586 |
| FRAT1    | 1.00662  | 0.941335 | 1.076433 | 0.84707  |
| UBTD1    | 0.947706 | 0.885151 | 1.014682 | 0.123168 |
| E2F7     | 1.225936 | 1.150417 | 1.306413 | 3.40E-10 |
| ISCA2    | 1.202123 | 1.073521 | 1.346131 | 0.001428 |
| PACSIN3  | 1.030085 | 0.932391 | 1.138014 | 0.559874 |
| TTC7B    | 0.889917 | 0.82648  | 0.958223 | 0.001995 |
| SLC39A13 | 1.057045 | 0.96617  | 1.156467 | 0.226438 |
| PSMC3    | 1.10868  | 0.9829   | 1.250556 | 0.093108 |
| RAPSN    | 0.954561 | 0.898716 | 1.013875 | 0.130546 |
| AGBL2    | 1.006937 | 0.878427 | 1.154248 | 0.920951 |
| TC2N     | 1.020336 | 0.969121 | 1.074257 | 0.443553 |

|         |          |          |          |          |
|---------|----------|----------|----------|----------|
| CPSF2   | 1.122575 | 1.040405 | 1.211234 | 0.00287  |
| MOAP1   | 1.114148 | 1.021853 | 1.214779 | 0.014288 |
| IFI27L1 | 1.211828 | 1.088356 | 1.349308 | 0.000458 |
| IFI27   | 1.044487 | 1.003756 | 1.08687  | 0.031979 |
| CLMN    | 0.916241 | 0.85728  | 0.979257 | 0.009948 |
| PDZRN4  | 1.177312 | 1.097503 | 1.262926 | 5.17E-06 |
| CCDC38  | 1.116802 | 0.994592 | 1.254028 | 0.061727 |
| PTER    | 1.160277 | 1.072821 | 1.254863 | 0.000201 |
| C1QL3   | 1.158229 | 1.061933 | 1.263257 | 0.000911 |
| CACNB2  | 1.187455 | 1.111725 | 1.268345 | 3.22E-07 |
| ARL5B   | 0.954747 | 0.900192 | 1.012609 | 0.122932 |
| TAF1D   | 0.937373 | 0.872774 | 1.006754 | 0.075866 |
| ABTB2   | 1.068248 | 1.009619 | 1.130281 | 0.021884 |
| AMOTL1  | 1.093073 | 1.035957 | 1.153337 | 0.001154 |
| HTRA1   | 1.317599 | 1.152498 | 1.506351 | 5.39E-05 |
| LIPC    | 1.266926 | 1.156453 | 1.387952 | 3.72E-07 |
| CEP57   | 0.923229 | 0.84572  | 1.007841 | 0.0742   |
| TCP11L2 | 0.998464 | 0.944411 | 1.055611 | 0.956826 |
| SPRED1  | 1.103055 | 1.024235 | 1.18794  | 0.009514 |
| GPR176  | 1.437956 | 1.268413 | 1.63016  | 1.39E-08 |
| JAM3    | 1.049579 | 0.970128 | 1.135537 | 0.228265 |
| CMTM5   | 1.149518 | 1.092583 | 1.20942  | 7.60E-08 |
| ADAMTS1 | 0.933068 | 0.841359 | 1.034772 | 0.189377 |
| GPT2    | 1.087061 | 1.036527 | 1.140058 | 0.000588 |
| AMN     | 0.910499 | 0.85902  | 0.965062 | 0.001591 |
| RAB8B   | 0.964909 | 0.907837 | 1.025569 | 0.250829 |
| IKBIP   | 1.019661 | 0.93018  | 1.117751 | 0.677784 |
| RPUSD2  | 1.231394 | 1.114622 | 1.3604   | 4.23E-05 |
| HIF1AN  | 1.027996 | 0.958139 | 1.102946 | 0.441901 |
| NDUFB8  | 1.24973  | 1.124944 | 1.388357 | 3.27E-05 |
| ZFYVE19 | 1.201955 | 1.101011 | 1.312155 | 3.96E-05 |
| SPINT1  | 1.114602 | 1.059787 | 1.172253 | 2.48E-05 |
| FBN1    | 1.044816 | 0.991996 | 1.100447 | 0.097649 |
| AVPR1A  | 1.021301 | 0.904558 | 1.153111 | 0.733613 |
| DEPDC4  | 1.109377 | 0.958712 | 1.28372  | 0.163383 |
| LRTM2   | 1.139492 | 1.021998 | 1.270494 | 0.01868  |
| BRD7    | 1.060624 | 0.956722 | 1.175809 | 0.263182 |
| CKB     | 0.910375 | 0.868383 | 0.954398 | 9.73E-05 |
| TRMT61A | 1.061071 | 0.978141 | 1.151033 | 0.153385 |
| BTRC    | 1.046151 | 0.972027 | 1.125928 | 0.228864 |
| POLL    | 1.03172  | 0.930736 | 1.143661 | 0.552387 |
| BAG5    | 1.063856 | 0.973396 | 1.162724 | 0.172177 |
| API5    | 1.079309 | 0.991698 | 1.174661 | 0.077235 |
| ZNF319  | 1.028367 | 0.950888 | 1.112159 | 0.483994 |
| HPS6    | 1.013266 | 0.942913 | 1.088869 | 0.719628 |
| SENP8   | 1.009356 | 0.891838 | 1.142361 | 0.882771 |
| NOLC1   | 1.026099 | 0.954173 | 1.103446 | 0.487155 |
| ALKBH3  | 1.005596 | 0.909712 | 1.111586 | 0.913088 |
| COPS2   | 0.92863  | 0.855706 | 1.007769 | 0.075981 |
| SGPL1   | 1.118466 | 1.037476 | 1.205779 | 0.003509 |
| FRS2    | 1.011485 | 0.932921 | 1.096666 | 0.78192  |
| CCT2    | 0.972408 | 0.892277 | 1.059735 | 0.523682 |
| PCBD1   | 1.126235 | 1.046109 | 1.212499 | 0.001594 |
| ARIH1   | 0.960776 | 0.895152 | 1.031211 | 0.267635 |
| COX11   | 1.249036 | 1.125575 | 1.38604  | 2.82E-05 |
| ZNF202  | 1.175019 | 1.078638 | 1.280012 | 0.000221 |
| STXBP4  | 1.193765 | 1.080245 | 1.319214 | 0.000513 |
| CYYR1   | 1.129508 | 1.056877 | 1.20713  | 0.000329 |

|          |          |          |          |          |
|----------|----------|----------|----------|----------|
| CUL5     | 0.993622 | 0.913229 | 1.081093 | 0.881842 |
| C2       | 1.066932 | 0.9985   | 1.140054 | 0.055419 |
| PLEKHF1  | 1.087921 | 1.01529  | 1.165748 | 0.01683  |
| SMPD1    | 1.141287 | 1.048802 | 1.241928 | 0.002176 |
| APBB1    | 1.081888 | 1.024781 | 1.142178 | 0.004446 |
| SYNPO2L  | 1.528067 | 1.330593 | 1.754849 | 1.91E-09 |
| NUDT13   | 0.94368  | 0.888983 | 1.001742 | 0.057063 |
| TRIM44   | 1.111723 | 1.029227 | 1.200832 | 0.007097 |
| ILK      | 1.046322 | 0.932816 | 1.173639 | 0.439589 |
| TAF10    | 0.983301 | 0.865947 | 1.11656  | 0.795096 |
| TPP1     | 1.018172 | 0.949378 | 1.09195  | 0.613882 |
| DCHS1    | 1.010771 | 0.965946 | 1.057676 | 0.643437 |
| CYB5A    | 1.620566 | 1.451386 | 1.809466 | 9.32E-18 |
| USP54    | 1.069842 | 0.990519 | 1.155517 | 0.085872 |
| RAG1     | 1.146604 | 1.080961 | 1.216234 | 5.41E-06 |
| WDR88    | 1.079552 | 1.006508 | 1.157896 | 0.032239 |
| ATP9B    | 0.979438 | 0.908651 | 1.055741 | 0.587267 |
| PPFIBP2  | 1.063617 | 1.007679 | 1.122661 | 0.025256 |
| CYB5R2   | 1.230932 | 1.135756 | 1.334083 | 4.18E-07 |
| SERPINB8 | 0.927399 | 0.880111 | 0.977227 | 0.004762 |
| RIC3     | 1.029219 | 0.895265 | 1.183217 | 0.6856   |
| IDH3A    | 1.113635 | 1.019986 | 1.215882 | 0.016327 |
| CRABP1   | 1.145978 | 1.070587 | 1.226677 | 8.69E-05 |
| PLD4     | 1.050016 | 1.010724 | 1.090836 | 0.012137 |
| ZMAT1    | 0.954874 | 0.895602 | 1.018067 | 0.157861 |
| XRRA1    | 1.035121 | 0.969259 | 1.105458 | 0.303436 |
| TRIM66   | 1.028027 | 0.960166 | 1.100684 | 0.427597 |
| RNF169   | 1.013205 | 0.946861 | 1.084197 | 0.704187 |
| RPL27A   | 0.908956 | 0.846988 | 0.975459 | 0.008057 |
| CDYL2    | 0.945813 | 0.89866  | 0.99544  | 0.032751 |
| CENPN    | 1.055536 | 0.948605 | 1.17452  | 0.321303 |
| ATMIN    | 1.07855  | 0.99258  | 1.171967 | 0.074387 |
| TMEM41B  | 0.97543  | 0.911049 | 1.04436  | 0.475173 |
| LEO1     | 0.972322 | 0.887459 | 1.0653   | 0.546917 |
| ZNF143   | 0.982489 | 0.916776 | 1.052912 | 0.616954 |
| TMX3     | 1.064644 | 0.985696 | 1.149915 | 0.111056 |
| MFAP4    | 0.841396 | 0.799358 | 0.885645 | 4.01E-11 |
| WEE1     | 1.086017 | 1.007919 | 1.170166 | 0.030226 |
| MAPK7    | 0.880737 | 0.823459 | 0.941999 | 0.000214 |
| PRKCB    | 0.992537 | 0.933158 | 1.055694 | 0.81188  |
| NDST2    | 1.04904  | 0.957136 | 1.149768 | 0.306101 |
| MCM7     | 1.079484 | 0.99267  | 1.173891 | 0.073779 |
| CCDC68   | 1.305485 | 1.19938  | 1.420977 | 7.12E-10 |
| CLEC4E   | 0.981099 | 0.936511 | 1.027811 | 0.421359 |
| ZNF3     | 1.075723 | 0.983941 | 1.176066 | 0.108677 |
| CLEC4D   | 1.030053 | 0.99082  | 1.070839 | 0.135042 |
| ZSCAN21  | 0.998632 | 0.897515 | 1.111141 | 0.979944 |
| RIMKLB   | 1.034999 | 0.965667 | 1.10931  | 0.330845 |
| TK2      | 1.114573 | 1.028242 | 1.208151 | 0.008363 |
| TMED3    | 1.127922 | 1.012451 | 1.256563 | 0.028924 |
| SEC11C   | 1.284551 | 1.187633 | 1.389378 | 3.94E-10 |
| TMEM135  | 1.095954 | 1.007743 | 1.191886 | 0.032345 |
| IQCD     | 1.052873 | 0.962175 | 1.152121 | 0.262282 |
| NDEL1    | 0.868015 | 0.80729  | 0.933307 | 0.000131 |
| CENPV    | 0.96385  | 0.887468 | 1.046807 | 0.382092 |
| RRAD     | 0.985731 | 0.93665  | 1.037384 | 0.581271 |
| HSP90B1  | 0.940166 | 0.870478 | 1.015432 | 0.116362 |
| BLCAP    | 1.145215 | 1.043438 | 1.25692  | 0.004298 |

|          |          |          |          |          |
|----------|----------|----------|----------|----------|
| CHRFAM7  | 1.079042 | 1.00186  | 1.16217  | 0.044533 |
| ATF7IP2  | 0.993215 | 0.916034 | 1.076898 | 0.868971 |
| TMPRSS5  | 0.986088 | 0.897935 | 1.082896 | 0.769371 |
| COG1     | 1.045336 | 0.956072 | 1.142934 | 0.330268 |
| PLEKHA7  | 1.30716  | 1.180875 | 1.446949 | 2.38E-07 |
| ZNF606   | 1.056609 | 0.977312 | 1.142339 | 0.16654  |
| B2M      | 0.982587 | 0.896851 | 1.076519 | 0.706092 |
| ZNF592   | 0.933278 | 0.858824 | 1.014187 | 0.103552 |
| NNMT     | 1.052798 | 0.963952 | 1.149833 | 0.252712 |
| ACSM1    | 0.871798 | 0.838942 | 0.905942 | 2.57E-12 |
| AP1G1    | 0.948536 | 0.891828 | 1.00885  | 0.09299  |
| SLFN5    | 1.06175  | 1.003145 | 1.123779 | 0.038607 |
| CATSPER2 | 1.070042 | 0.979958 | 1.168407 | 0.131361 |
| SAAL1    | 1.100923 | 0.990629 | 1.223498 | 0.074236 |
| YPEL4    | 1.000504 | 0.950557 | 1.053076 | 0.984604 |
| PPIB     | 0.946789 | 0.858967 | 1.043591 | 0.270941 |
| LDHC     | 0.943941 | 0.846703 | 1.052346 | 0.298289 |
| LDHAL6A  | 1.15522  | 1.018228 | 1.310642 | 0.025062 |
| FAM111A  | 1.073221 | 1.009858 | 1.14056  | 0.022851 |
| KIF7     | 1.055756 | 0.987305 | 1.128953 | 0.11265  |
| LDHD     | 1.099366 | 1.029509 | 1.173964 | 0.004681 |
| PEX11A   | 1.185394 | 1.067948 | 1.315756 | 0.001399 |
| TMEM170  | 1.015189 | 0.929544 | 1.108725 | 0.737449 |
| MESP1    | 1.572418 | 1.366861 | 1.808887 | 2.42E-10 |
| ANPEP    | 0.947603 | 0.912223 | 0.984356 | 0.005569 |
| RBPMS2   | 1.03155  | 0.989434 | 1.07546  | 0.144146 |
| NAV2     | 1.162477 | 1.014267 | 1.332345 | 0.0305   |
| ANKDD1A  | 1.042588 | 0.97363  | 1.116429 | 0.232266 |
| DCTN5    | 1.015038 | 0.929487 | 1.108462 | 0.739702 |
| TERF2IP  | 1.117433 | 1.000647 | 1.247848 | 0.048672 |
| PLK1     | 1.078396 | 0.998964 | 1.164145 | 0.053186 |
| CLPX     | 0.972266 | 0.886886 | 1.065865 | 0.548664 |
| GPR182   | 1.079614 | 0.911466 | 1.278782 | 0.375182 |
| ZBTB39   | 1.018182 | 0.942635 | 1.099784 | 0.646884 |
| TAC3     | 1.047679 | 0.957148 | 1.146772 | 0.312435 |
| MYO1A    | 0.95846  | 0.854964 | 1.074484 | 0.466777 |
| NAB2     | 0.898066 | 0.845274 | 0.954156 | 0.000505 |
| VPS39    | 1.01723  | 0.932232 | 1.109979 | 0.701181 |
| STAT6    | 1.006831 | 0.931344 | 1.088437 | 0.864063 |
| PATL1    | 0.894889 | 0.824056 | 0.97181  | 0.0083   |
| STX3     | 0.934067 | 0.868838 | 1.004193 | 0.064793 |
| MRPL16   | 1.045813 | 0.951478 | 1.149501 | 0.353031 |
| PIP4K2C  | 1.38576  | 1.281652 | 1.498324 | 2.67E-16 |
| MTMR10   | 0.919857 | 0.865178 | 0.977991 | 0.007546 |
| YWHAB    | 1.161574 | 1.050934 | 1.283862 | 0.00336  |
| SCG5     | 1.05587  | 0.980406 | 1.137141 | 0.150738 |
| TSC22D4  | 0.8675   | 0.793392 | 0.948532 | 0.00181  |
| MS4A7    | 1.009646 | 0.963699 | 1.057784 | 0.686236 |
| MS4A14   | 0.956516 | 0.901275 | 1.015143 | 0.142983 |
| DIS3L    | 1.039595 | 0.960291 | 1.125448 | 0.337492 |
| CCNDBP1  | 1.107047 | 1.0054   | 1.218971 | 0.038494 |
| EPB42    | 0.991959 | 0.957759 | 1.02738  | 0.651974 |
| SMAD3    | 1.126778 | 1.062958 | 1.194429 | 6.01E-05 |
| MAP1A    | 1.066689 | 1.019648 | 1.115901 | 0.005024 |
| RCCD1    | 1.101081 | 1.018459 | 1.190406 | 0.015539 |
| AKTIP    | 1.084487 | 1.009389 | 1.165171 | 0.026746 |
| MAPRE2   | 0.973916 | 0.894291 | 1.06063  | 0.543618 |
| MBD6     | 0.918891 | 0.836197 | 1.009764 | 0.078743 |

|         |          |          |          |          |
|---------|----------|----------|----------|----------|
| CNPY4   | 1.188032 | 1.086922 | 1.298547 | 0.000147 |
| PDIA3   | 0.851244 | 0.789293 | 0.918057 | 2.95E-05 |
| NUDT21  | 1.017946 | 0.926176 | 1.118809 | 0.712136 |
| NKX3-1  | 1.232311 | 1.156363 | 1.313248 | 1.22E-10 |
| DUSP18  | 1.137061 | 1.027461 | 1.258353 | 0.012998 |
| TEF     | 1.140162 | 1.038277 | 1.252045 | 0.006024 |
| MEI1    | 1.186683 | 1.08059  | 1.303193 | 0.000341 |
| PBX3    | 1.070224 | 1.030704 | 1.111258 | 0.000407 |
| GNGT2   | 1.334989 | 1.231166 | 1.447567 | 2.66E-12 |
| PHB     | 1.176995 | 1.083507 | 1.27855  | 0.000114 |
| SNRPD1  | 1.144474 | 1.029709 | 1.272031 | 0.012315 |
| TTC16   | 1.177143 | 1.015929 | 1.363939 | 0.029987 |
| SAMD14  | 1.197844 | 1.115201 | 1.286613 | 7.45E-07 |
| PIP5KL1 | 1.079489 | 1.003306 | 1.161457 | 0.040526 |
| TMEM92  | 1.136062 | 1.040684 | 1.240182 | 0.004354 |
| FAM102A | 1.018415 | 0.96699  | 1.072575 | 0.490045 |
| ACSF2   | 1.105558 | 1.019863 | 1.198453 | 0.014779 |
| GOLGA2  | 0.927753 | 0.851708 | 1.010588 | 0.085688 |
| TRUB2   | 1.130885 | 1.039714 | 1.23005  | 0.00413  |
| COQ4    | 1.077314 | 0.969542 | 1.197065 | 0.166116 |
| SLC27A4 | 1.120338 | 1.051424 | 1.193768 | 0.000451 |
| URM1    | 1.031653 | 0.924863 | 1.150773 | 0.576202 |
| CERCAM  | 0.961531 | 0.909104 | 1.016981 | 0.170269 |
| DOLPP1  | 1.152712 | 1.065817 | 1.246692 | 0.000379 |
| ENDOG   | 1.057693 | 0.979341 | 1.142314 | 0.15319  |
| SP2     | 0.965857 | 0.877528 | 1.063076 | 0.477736 |
| PRR15L  | 1.196455 | 1.091877 | 1.311051 | 0.000121 |
| COQ7    | 1.06101  | 0.966037 | 1.165319 | 0.215799 |
| GPRC5B  | 0.794023 | 0.628853 | 1.002576 | 0.052581 |
| CRK     | 0.987354 | 0.913961 | 1.06664  | 0.746735 |
| FBXO22  | 1.075231 | 0.993653 | 1.163507 | 0.071576 |
| TBC1D2B | 0.915735 | 0.864585 | 0.969911 | 0.002684 |
| NOD2    | 1.048978 | 0.997766 | 1.102819 | 0.061155 |
| SNX20   | 1.135    | 1.058459 | 1.217076 | 0.000378 |
| LOXHD1  | 0.99466  | 0.95048  | 1.040894 | 0.81734  |
| KATNAL2 | 1.07245  | 0.977469 | 1.17666  | 0.139322 |
| HDHD2   | 1.037705 | 0.941392 | 1.143872 | 0.456439 |
| ZNF91   | 0.942282 | 0.892966 | 0.994322 | 0.030192 |
| RNF214  | 0.995891 | 0.896398 | 1.106426 | 0.938882 |
| DPEP2   | 1.004361 | 0.938097 | 1.075306 | 0.900559 |
| POP5    | 1.062306 | 0.97959  | 1.152007 | 0.143913 |
| CD3D    | 0.954987 | 0.911675 | 1.000357 | 0.051786 |
| TBC1D16 | 0.969978 | 0.911045 | 1.032724 | 0.340533 |
| ACAA2   | 1.020426 | 0.942571 | 1.104712 | 0.61753  |
| STIM1   | 0.944244 | 0.871491 | 1.023071 | 0.160796 |
| RRM1    | 1.11277  | 1.026264 | 1.206567 | 0.009658 |
| TRIM68  | 1.168997 | 1.074844 | 1.271397 | 0.000268 |
| FN3K    | 1.119564 | 1.05748  | 1.185293 | 0.000104 |
| IRGQ    | 0.920292 | 0.871197 | 0.972155 | 0.002982 |
| ZNF226  | 1.178016 | 1.075508 | 1.290294 | 0.00042  |
| ZNF180  | 1.121979 | 1.023007 | 1.230526 | 0.014576 |
| PPP2R3B | 1.185908 | 1.077149 | 1.305647 | 0.000512 |
| ZNF668  | 1.02503  | 0.947596 | 1.108792 | 0.537323 |
| ZNF646  | 1.031958 | 0.959922 | 1.109399 | 0.394182 |
| VKORC1  | 1.400378 | 1.249918 | 1.568948 | 6.37E-09 |
| GNG8    | 1.009558 | 0.936736 | 1.088041 | 0.803335 |
| LPO     | 0.823136 | 0.784305 | 0.863888 | 2.92E-15 |
| CA4     | 0.991516 | 0.935697 | 1.050665 | 0.7732   |

|          |          |          |          |          |
|----------|----------|----------|----------|----------|
| TPM4     | 0.972348 | 0.913427 | 1.03507  | 0.379286 |
| RAB8A    | 1.140642 | 1.034703 | 1.257428 | 0.008148 |
| GPX4     | 0.979266 | 0.900767 | 1.064606 | 0.623104 |
| MIDN     | 0.932094 | 0.867445 | 1.001562 | 0.055186 |
| JSRP1    | 0.973843 | 0.88621  | 1.070142 | 0.581696 |
| KLHL26   | 0.914225 | 0.83955  | 0.995542 | 0.039139 |
| GATAD2A  | 0.892471 | 0.82294  | 0.967876 | 0.005979 |
| MVD      | 1.260306 | 1.135658 | 1.398635 | 1.34E-05 |
| CDT1     | 0.936372 | 0.87067  | 1.007032 | 0.076532 |
| TRAPPC2L | 1.136192 | 1.007674 | 1.281102 | 0.037089 |
| ANKRD11  | 0.978721 | 0.8982   | 1.06646  | 0.623401 |
| PROCA1   | 1.068656 | 0.972012 | 1.174908 | 0.169753 |
| RPL13    | 0.875007 | 0.809934 | 0.945309 | 0.000708 |
| ZNF641   | 1.080862 | 1.001326 | 1.166715 | 0.046157 |
| CACNB3   | 1.285285 | 1.182297 | 1.397245 | 3.87E-09 |
| DHRS13   | 1.094031 | 1.005262 | 1.19064  | 0.037387 |
| TP53I13  | 1.106186 | 1.012608 | 1.208411 | 0.025235 |
| CORO6    | 0.922255 | 0.851513 | 0.998874 | 0.046853 |
| RHEBL1   | 1.187513 | 1.112921 | 1.267105 | 2.08E-07 |
| TUBA1A   | 0.991304 | 0.932881 | 1.053387 | 0.778099 |
| TUBA1C   | 1.042434 | 0.962496 | 1.129011 | 0.307292 |
| ZNF610   | 1.062616 | 0.970378 | 1.163623 | 0.189885 |
| ZNF528   | 1.096527 | 1.021212 | 1.177396 | 0.011145 |
| ZNF701   | 1.125788 | 1.027901 | 1.232997 | 0.010683 |
| SERTAD3  | 1.003552 | 0.924882 | 1.088913 | 0.932156 |
| RAB4B    | 1.238269 | 1.086272 | 1.411534 | 0.001382 |
| GPD1     | 1.012916 | 0.908351 | 1.129518 | 0.817429 |
| CYP2S1   | 0.955116 | 0.914109 | 0.997962 | 0.04026  |
| AXL      | 0.951686 | 0.893591 | 1.013558 | 0.12334  |
| NFKBID   | 0.980247 | 0.920759 | 1.043579 | 0.53225  |
| TMC4     | 0.935376 | 0.864393 | 1.012188 | 0.097093 |
| LAIR1    | 0.964614 | 0.905145 | 1.02799  | 0.267132 |
| TTYH1    | 1.122969 | 1.01003  | 1.248538 | 0.031993 |
| LENG8    | 0.936236 | 0.882994 | 0.992688 | 0.02741  |
| CDC42EP5 | 0.94442  | 0.82777  | 1.077508 | 0.395241 |
| LAIR2    | 1.047042 | 0.964999 | 1.136059 | 0.269518 |
| ZNF526   | 1.012646 | 0.933059 | 1.099021 | 0.763482 |
| TRAPPC9  | 1.042143 | 0.967326 | 1.122746 | 0.277481 |
| KIR3DL1  | 1.141317 | 0.984768 | 1.322752 | 0.07908  |
| ZNF146   | 0.999453 | 0.930618 | 1.073381 | 0.988017 |
| ZNF283   | 1.137181 | 1.038981 | 1.244663 | 0.005273 |
| PPP1R14A | 0.956227 | 0.898949 | 1.017155 | 0.155538 |
| SPINT2   | 1.221518 | 1.140552 | 1.308231 | 1.08E-08 |
| YIF1B    | 1.120473 | 1.025458 | 1.224293 | 0.011869 |
| PSCA     | 1.066742 | 0.963696 | 1.180807 | 0.212575 |
| ATCAY    | 0.932141 | 0.827354 | 1.050198 | 0.248106 |
| DAPK3    | 0.91072  | 0.843222 | 0.983622 | 0.0173   |
| EEF2     | 0.845712 | 0.785292 | 0.910781 | 9.38E-06 |
| TMIGD2   | 0.868033 | 0.831337 | 0.906349 | 1.35E-10 |
| CHAF1A   | 1.097451 | 1.010585 | 1.191785 | 0.027089 |
| UBXN6    | 0.940743 | 0.848736 | 1.042724 | 0.244723 |
| SEMA6B   | 1.04688  | 0.999724 | 1.096261 | 0.051387 |
| ZNF444   | 1.123857 | 1.023127 | 1.234505 | 0.014802 |
| NXN      | 1.116118 | 1.034891 | 1.20372  | 0.004378 |
| GLOD4    | 1.085188 | 0.982029 | 1.199184 | 0.108682 |
| MFSD3    | 1.101432 | 1.038212 | 1.168502 | 0.001358 |
| GPT      | 1.092686 | 1.020524 | 1.169951 | 0.010997 |
| KIFC2    | 1.076276 | 1.011074 | 1.145683 | 0.021146 |



|          |          |          |          |          |
|----------|----------|----------|----------|----------|
| SLC43A2  | 1.062703 | 1.004244 | 1.124565 | 0.035146 |
| RILP     | 1.023726 | 0.941574 | 1.113045 | 0.582727 |
| SERPINF2 | 0.959693 | 0.87662  | 1.050637 | 0.373125 |
| WDR81    | 0.997449 | 0.937286 | 1.061475 | 0.935873 |
| SRR      | 1.012629 | 0.916294 | 1.119092 | 0.805638 |
| TSR1     | 1.079734 | 0.986979 | 1.181206 | 0.094138 |
| HSD11B1L | 0.990231 | 0.91314  | 1.073829 | 0.812336 |
| CYB5D2   | 1.037269 | 0.938254 | 1.146734 | 0.474702 |
| KLK1     | 1.40917  | 1.287479 | 1.542363 | 9.80E-14 |
| ZNF83    | 1.061185 | 0.986372 | 1.141671 | 0.111361 |
| KRT80    | 0.781374 | 0.687804 | 0.887675 | 0.00015  |
| KRT1     | 0.970227 | 0.922333 | 1.020608 | 0.241913 |
| OTUB1    | 1.138046 | 0.996645 | 1.299509 | 0.056091 |
| RCOR2    | 1.078623 | 1.003802 | 1.159021 | 0.039073 |
| ANGPTL4  | 0.954171 | 0.888846 | 1.024298 | 0.194809 |
| CD320    | 0.978241 | 0.906462 | 1.055705 | 0.571542 |
| SPRYD3   | 1.112749 | 1.027236 | 1.205381 | 0.008829 |
| IGFBP6   | 0.907778 | 0.839383 | 0.981746 | 0.015481 |
| ZNF558   | 1.107219 | 1.01234  | 1.21099  | 0.025862 |
| NDUFV1   | 1.179197 | 1.054353 | 1.318825 | 0.00389  |
| CDK2AP2  | 0.976326 | 0.901652 | 1.057184 | 0.555071 |
| NUDT8    | 1.113745 | 1.029566 | 1.204808 | 0.007218 |
| TBX10    | 1.154091 | 1.052875 | 1.265038 | 0.002212 |
| PRDX2    | 1.02465  | 0.979521 | 1.071859 | 0.289326 |
| ZNF232   | 1.274505 | 1.172061 | 1.385904 | 1.40E-08 |
| MIS12    | 1.131383 | 1.022769 | 1.251532 | 0.016523 |
| CD300C   | 1.055198 | 1.009078 | 1.103425 | 0.018457 |
| CD300A   | 1.165807 | 1.100376 | 1.235129 | 1.93E-07 |
| TMEM88   | 0.930567 | 0.865576 | 1.000438 | 0.051402 |
| EVPL     | 0.861283 | 0.818733 | 0.906043 | 7.61E-09 |
| SRP68    | 0.989827 | 0.897582 | 1.091552 | 0.837685 |
| MGAT5B   | 1.24286  | 1.152833 | 1.339917 | 1.45E-08 |
| TMC8     | 1.05528  | 0.98203  | 1.133993 | 0.142666 |
| TK1      | 1.146602 | 1.061159 | 1.238925 | 0.000535 |
| TMEM68   | 1.17043  | 1.038202 | 1.319497 | 0.010085 |
| TMEM99   | 1.432178 | 1.243807 | 1.649079 | 5.97E-07 |
| GHDC     | 1.066889 | 0.98167  | 1.159506 | 0.127406 |
| ZNF598   | 0.861142 | 0.802857 | 0.923658 | 2.90E-05 |
| RAB26    | 0.965679 | 0.914043 | 1.020231 | 0.212908 |
| MLST8    | 0.990972 | 0.887286 | 1.106775 | 0.872233 |
| E4F1     | 1.118381 | 1.023095 | 1.222541 | 0.013797 |
| DNASE1L2 | 1.083281 | 0.977417 | 1.200612 | 0.127353 |
| CASKIN1  | 0.804619 | 0.699218 | 0.925909 | 0.002409 |
| ABCA3    | 1.128484 | 1.048459 | 1.214617 | 0.001278 |
| KCTD5    | 1.07871  | 0.996711 | 1.167455 | 0.060342 |
| SRRM2    | 0.897585 | 0.825068 | 0.976476 | 0.011943 |
| ZNF597   | 0.991593 | 0.90985  | 1.080679 | 0.847472 |
| NLRC3    | 1.041261 | 0.984517 | 1.101275 | 0.157305 |
| SDHAF2   | 1.12955  | 1.003519 | 1.271408 | 0.043574 |
| DDB1     | 1.003822 | 0.922391 | 1.092441 | 0.929583 |
| VPS37C   | 1.043694 | 0.974115 | 1.118243 | 0.224397 |
| VWCE     | 0.897689 | 0.83932  | 0.960117 | 0.001652 |
| RAB3IL1  | 0.955023 | 0.896294 | 1.017599 | 0.155261 |
| BEST1    | 1.028723 | 0.960253 | 1.102075 | 0.420348 |
| FTH1     | 0.938179 | 0.883829 | 0.995871 | 0.036096 |
| BSCL2    | 1.064334 | 0.966533 | 1.17203  | 0.204869 |
| POLR2G   | 1.147183 | 1.01519  | 1.296338 | 0.027686 |
| SLC3A2   | 0.975504 | 0.888937 | 1.070502 | 0.600924 |

|          |          |          |          |          |
|----------|----------|----------|----------|----------|
| ATG16L2  | 1.029344 | 0.96819  | 1.094361 | 0.35471  |
| C2CD3    | 1.044924 | 0.964021 | 1.132616 | 0.285172 |
| TTC21A   | 0.94175  | 0.884929 | 1.002218 | 0.058735 |
| RPSA     | 0.877718 | 0.809745 | 0.951397 | 0.001517 |
| CTNNB1   | 0.941791 | 0.885409 | 1.001764 | 0.056908 |
| ULK4     | 1.060786 | 0.990717 | 1.135812 | 0.090555 |
| FADD     | 0.950691 | 0.870089 | 1.038759 | 0.263271 |
| LTBP3    | 0.942742 | 0.885678 | 1.003482 | 0.064192 |
| NAALADL  | 0.960519 | 0.896649 | 1.028939 | 0.251233 |
| SAC3D1   | 1.122353 | 1.049306 | 1.200485 | 0.000775 |
| BATF2    | 1.292135 | 1.150198 | 1.451587 | 1.58E-05 |
| SF1      | 0.866168 | 0.791348 | 0.948063 | 0.001827 |
| MAP4K2   | 0.983998 | 0.907628 | 1.066794 | 0.695543 |
| CCDC88B  | 1.041524 | 0.979118 | 1.107907 | 0.196857 |
| SCARA3   | 0.983471 | 0.901777 | 1.072566 | 0.706404 |
| PBK      | 1.15215  | 1.081561 | 1.227346 | 1.13E-05 |
| PNOC     | 1.157444 | 1.048907 | 1.277213 | 0.00361  |
| COPS6    | 1.247753 | 1.125419 | 1.383385 | 2.62E-05 |
| PAFAH1B2 | 0.9729   | 0.904393 | 1.046596 | 0.460832 |
| ANKS3    | 1.031668 | 0.956307 | 1.112969 | 0.420486 |
| NUDT16L1 | 1.149397 | 1.032543 | 1.279475 | 0.010915 |
| KIAA1586 | 1.019878 | 0.95394  | 1.090375 | 0.56381  |
| RAB4A    | 0.847142 | 0.769905 | 0.932128 | 0.000672 |
| OR2B2    | 0.94934  | 0.844798 | 1.066819 | 0.382466 |
| SETD5    | 0.933944 | 0.871675 | 1.000661 | 0.052234 |
| VASN     | 0.978661 | 0.925093 | 1.035331 | 0.452627 |
| THAP9    | 0.948081 | 0.862808 | 1.041782 | 0.267546 |
| RNF187   | 1.113027 | 1.016836 | 1.218317 | 0.020233 |
| HOOK3    | 1.020308 | 0.93793  | 1.109922 | 0.639735 |
| MAPK1IP1 | 0.964189 | 0.871301 | 1.06698  | 0.480449 |
| DDIT4    | 1.119839 | 1.067173 | 1.175104 | 4.12E-06 |
| RBPJ     | 0.999325 | 0.926142 | 1.078292 | 0.986119 |
| LMBRD1   | 0.947016 | 0.869164 | 1.031842 | 0.213577 |
| ZCCHC4   | 1.045473 | 0.954592 | 1.145008 | 0.337857 |
| PTGDR    | 1.04688  | 0.943154 | 1.162013 | 0.389463 |
| TTC39C   | 1.131001 | 1.04205  | 1.227546 | 0.003224 |
| GLYCTK   | 1.039865 | 0.969322 | 1.115542 | 0.275426 |
| GNG4     | 0.968949 | 0.837722 | 1.120733 | 0.670962 |
| UBTD2    | 1.064234 | 0.992088 | 1.141627 | 0.082179 |
| POLR2J3  | 1.042748 | 0.953108 | 1.14082  | 0.361376 |
| NKIRAS2  | 0.881015 | 0.792961 | 0.978847 | 0.018379 |
| DNAJC7   | 0.942728 | 0.875575 | 1.015032 | 0.117762 |
| KCNV2    | 0.991121 | 0.89295  | 1.100085 | 0.866908 |
| IRF2BP2  | 1.108506 | 1.012557 | 1.213546 | 0.025739 |
| NT5DC2   | 1.064831 | 1.009519 | 1.123173 | 0.020996 |
| FOX11    | 0.961148 | 0.859407 | 1.074932 | 0.487569 |
| BMI1     | 1.183257 | 1.11422  | 1.256572 | 4.11E-08 |
| THAP11   | 1.043936 | 0.955934 | 1.14004  | 0.338583 |
| MMADHC   | 0.97809  | 0.884206 | 1.081942 | 0.666989 |
| PDHB     | 1.049228 | 0.955291 | 1.152401 | 0.315296 |
| PXK      | 0.863118 | 0.803931 | 0.926661 | 4.88E-05 |
| PCMTD1   | 0.984368 | 0.912667 | 1.061702 | 0.683043 |
| KCTD6    | 1.064879 | 0.980271 | 1.15679  | 0.136695 |
| ACOX2    | 1.050396 | 0.936968 | 1.177556 | 0.399066 |
| IRF2     | 1.049151 | 0.982849 | 1.119925 | 0.149706 |
| CX3CR1   | 1.093323 | 1.0513   | 1.137027 | 8.13E-06 |
| XIRP1    | 0.918801 | 0.849599 | 0.993641 | 0.034036 |
| DEGS2    | 0.996422 | 0.922013 | 1.076836 | 0.927877 |

|          |          |          |          |          |
|----------|----------|----------|----------|----------|
| ARF4     | 0.836583 | 0.76258  | 0.917768 | 0.000159 |
| FILIP1L  | 0.983231 | 0.926983 | 1.042891 | 0.573657 |
| DTYMK    | 1.213904 | 1.107313 | 1.330757 | 3.57E-05 |
| TAP1     | 1.0572   | 0.987692 | 1.131598 | 0.108922 |
| ING5     | 1.031068 | 0.951924 | 1.116792 | 0.452752 |
| ATG4B    | 1.042576 | 0.947869 | 1.146747 | 0.390839 |
| MLKL     | 1.054448 | 0.981427 | 1.132901 | 0.147631 |
| RFWD3    | 1.002896 | 0.933476 | 1.077478 | 0.937025 |
| RHOH     | 0.944735 | 0.897469 | 0.99449  | 0.029934 |
| KLHL30   | 1.02543  | 0.906724 | 1.159677 | 0.689114 |
| COG7     | 0.996977 | 0.913437 | 1.088158 | 0.945947 |
| CDC40    | 0.955086 | 0.885837 | 1.02975  | 0.231464 |
| STIP1    | 1.032398 | 0.934522 | 1.140525 | 0.530391 |
| HR       | 0.854574 | 0.757582 | 0.963984 | 0.010566 |
| RAB31    | 1.054112 | 1.009029 | 1.101209 | 0.018128 |
| REEP4    | 1.070852 | 0.981303 | 1.168574 | 0.12445  |
| TNXB     | 1.030998 | 0.970196 | 1.095611 | 0.324946 |
| BMP1     | 1.050553 | 0.976872 | 1.129792 | 0.183762 |
| ATXN2L   | 0.859192 | 0.784515 | 0.940977 | 0.00107  |
| POLR3D   | 1.009336 | 0.934072 | 1.090665 | 0.814185 |
| FEN1     | 1.232028 | 1.135525 | 1.336732 | 5.33E-07 |
| HEXIM2   | 1.00352  | 0.940892 | 1.070316 | 0.914896 |
| FNTA     | 0.984932 | 0.902344 | 1.075079 | 0.734016 |
| SERINC2  | 1.10998  | 1.053383 | 1.169618 | 9.32E-05 |
| COL3A1   | 1.090773 | 0.986905 | 1.205573 | 0.088794 |
| ING2     | 1.074966 | 0.963763 | 1.199    | 0.194467 |
| CDKN2AIP | 1.067063 | 0.985343 | 1.15556  | 0.110325 |
| SNRNP48  | 1.052165 | 0.955688 | 1.15838  | 0.300068 |
| SLC20A2  | 1.075619 | 0.987985 | 1.171026 | 0.092728 |
| TMUB2    | 0.984422 | 0.882271 | 1.098399 | 0.778794 |
| STAT3    | 0.988103 | 0.915994 | 1.065888 | 0.756888 |
| ZSWIM1   | 1.109916 | 1.004754 | 1.226085 | 0.040039 |
| ADAM9    | 0.924464 | 0.876477 | 0.975078 | 0.003878 |
| AXIN2    | 1.070922 | 0.971778 | 1.180182 | 0.166849 |
| NDUFS5   | 0.999244 | 0.933027 | 1.07016  | 0.982749 |
| ZNF30    | 1.054523 | 0.963212 | 1.15449  | 0.250615 |
| UGT3A2   | 0.944048 | 0.893634 | 0.997307 | 0.039756 |
| SLC16A4  | 1.0225   | 0.965499 | 1.082866 | 0.447096 |
| IL7R     | 1.000832 | 0.957149 | 1.046509 | 0.970861 |
| TMEM208  | 1.201875 | 1.061769 | 1.36047  | 0.003641 |
| AHCYL1   | 1.085234 | 0.997482 | 1.180705 | 0.057254 |
| DNAJC21  | 1.005139 | 0.909656 | 1.110644 | 0.91983  |
| PKIG     | 0.985465 | 0.924179 | 1.050816 | 0.654924 |
| FAM178B  | 1.069505 | 1.007013 | 1.135875 | 0.028708 |
| SEMA4C   | 1.038723 | 0.978238 | 1.102949 | 0.214544 |
| CNNM3    | 1.066783 | 0.989324 | 1.150308 | 0.092786 |
| GSTM4    | 1.265507 | 1.160058 | 1.380541 | 1.13E-07 |
| TET2     | 0.92377  | 0.864704 | 0.986872 | 0.018675 |
| TCTN2    | 1.086576 | 0.989542 | 1.193125 | 0.081913 |
| SHOX2    | 1.184301 | 1.107299 | 1.266658 | 8.17E-07 |
| TSPAN5   | 1.063468 | 1.008591 | 1.121331 | 0.022821 |
| ABHD15   | 1.156052 | 1.085146 | 1.231591 | 7.11E-06 |
| ZBTB5    | 0.955248 | 0.889274 | 1.026117 | 0.209887 |
| CHTF8    | 1.111242 | 0.88087  | 1.401863 | 0.373543 |
| ADAL     | 1.227874 | 1.101062 | 1.36929  | 0.000223 |
| LCMT2    | 1.312612 | 1.199149 | 1.436811 | 3.70E-09 |
| SNTB2    | 1.110841 | 1.021145 | 1.208416 | 0.014402 |
| IL12A    | 1.142041 | 1.055391 | 1.235805 | 0.00097  |

|          |          |          |          |          |
|----------|----------|----------|----------|----------|
| ZNF507   | 1.113983 | 1.038042 | 1.195478 | 0.002732 |
| STX18    | 0.904125 | 0.822726 | 0.993577 | 0.036276 |
| GFM1     | 1.124249 | 1.024566 | 1.233631 | 0.013426 |
| DDX19A   | 1.015811 | 0.92164  | 1.119605 | 0.751971 |
| ANKRD49  | 1.054797 | 0.96421  | 1.153894 | 0.244242 |
| SFTPB    | 0.944606 | 0.824959 | 1.081606 | 0.40954  |
| USP39    | 0.938591 | 0.849857 | 1.03659  | 0.211029 |
| TNIP2    | 0.986272 | 0.902931 | 1.077306 | 0.758944 |
| TMEM150, | 0.971785 | 0.897268 | 1.052491 | 0.48198  |
| RNF181   | 0.949637 | 0.855132 | 1.054587 | 0.33394  |
| VAMP5    | 0.876843 | 0.818189 | 0.939702 | 0.000199 |
| LRRC28   | 0.925866 | 0.856145 | 1.001264 | 0.053814 |
| MAT2A    | 0.972355 | 0.924153 | 1.023071 | 0.279832 |
| ENHO     | 0.789692 | 0.699737 | 0.891211 | 0.00013  |
| ZNF608   | 0.873449 | 0.829475 | 0.919753 | 2.84E-07 |
| INPP5D   | 0.948306 | 0.879228 | 1.022811 | 0.168981 |
| LETM1    | 1.088749 | 1.009421 | 1.174312 | 0.027602 |
| TMEM129  | 1.002322 | 0.928777 | 1.081691 | 0.952435 |
| PPIC     | 1.283307 | 1.15813  | 1.422015 | 1.90E-06 |
| SPRY3    | 1.064091 | 0.943247 | 1.200416 | 0.312492 |
| CEP120   | 1.04143  | 0.953854 | 1.137047 | 0.365043 |
| STXBP6   | 1.167139 | 1.073201 | 1.269301 | 0.000306 |
| MFF      | 1.082969 | 0.964343 | 1.216187 | 0.178119 |
| LGALS9   | 0.98368  | 0.916211 | 1.056118 | 0.649921 |
| SIGLEC7  | 1.070625 | 1.013567 | 1.130895 | 0.014597 |
| E2F6     | 1.082206 | 0.992354 | 1.180193 | 0.074033 |
| FEM1B    | 0.985943 | 0.906705 | 1.072106 | 0.740505 |
| COMMD8   | 1.003488 | 0.931769 | 1.080728 | 0.926662 |
| UQCDFS1  | 0.925873 | 0.834384 | 1.027393 | 0.146815 |
| MAP2K1   | 0.954467 | 0.883257 | 1.031417 | 0.23879  |
| HNRNPH1  | 0.970954 | 0.904767 | 1.041982 | 0.413189 |
| IRS1     | 1.06348  | 0.973647 | 1.161601 | 0.171671 |
| MECP2    | 0.98189  | 0.91237  | 1.056707 | 0.625696 |
| UPF3A    | 1.293877 | 1.155037 | 1.449407 | 8.64E-06 |
| ROR2     | 0.998114 | 0.902946 | 1.103312 | 0.970545 |
| BRD7P3   | 1.020252 | 0.957942 | 1.086615 | 0.5329   |
| AR       | 0.860507 | 0.80314  | 0.921972 | 1.97E-05 |
| DHRX     | 1.005666 | 0.915462 | 1.104759 | 0.90619  |
| HSPBAP1  | 0.979724 | 0.911322 | 1.053261 | 0.579084 |
| ASMTL    | 1.004696 | 0.918348 | 1.099162 | 0.918618 |
| SLC25A6  | 0.94068  | 0.860833 | 1.027933 | 0.176625 |
| CHST14   | 1.020989 | 0.952377 | 1.094545 | 0.558392 |
| PARM1    | 1.094691 | 0.93513  | 1.281478 | 0.260352 |
| CSNK1G1  | 1.013321 | 0.939727 | 1.092678 | 0.730857 |
| FAM110B  | 1.045626 | 0.984079 | 1.111021 | 0.149457 |
| AFAP1L2  | 1.326686 | 1.215133 | 1.448479 | 2.82E-10 |
| ZNF354A  | 1.147654 | 1.046804 | 1.258219 | 0.003339 |
| ATF5     | 1.104186 | 1.01778  | 1.197927 | 0.017131 |
| UBE2V2   | 1.149622 | 1.048419 | 1.260595 | 0.003021 |
| ZBTB43   | 0.983821 | 0.929881 | 1.040889 | 0.570734 |
| XPO6     | 1.017625 | 0.939505 | 1.102242 | 0.668119 |
| MN1      | 0.921434 | 0.88745  | 0.956719 | 1.98E-05 |
| APEX2    | 1.209184 | 1.095664 | 1.334466 | 0.000159 |
| NSMCE1   | 1.102163 | 0.99891  | 1.21609  | 0.052595 |
| CCDC126  | 1.1458   | 1.049263 | 1.25122  | 0.002439 |
| IL13     | 1.027991 | 0.911328 | 1.159589 | 0.653303 |
| CD2BP2   | 1.071143 | 0.978617 | 1.172416 | 0.135956 |
| RGS14    | 1.119075 | 1.04605  | 1.197197 | 0.001085 |

|          |          |          |          |          |
|----------|----------|----------|----------|----------|
| TBC1D10B | 0.974169 | 0.895487 | 1.059764 | 0.542484 |
| LMAN2    | 1.079586 | 0.974213 | 1.196356 | 0.143908 |
| RAB24    | 1.332096 | 1.206398 | 1.47089  | 1.42E-08 |
| PRELID1  | 1.140003 | 1.041204 | 1.248178 | 0.004612 |
| THBS3    | 1.024725 | 0.948077 | 1.10757  | 0.538056 |
| CA5B     | 1.115189 | 1.016569 | 1.223376 | 0.021009 |
| EFNA1    | 0.983676 | 0.924892 | 1.046195 | 0.600612 |
| CXCL10   | 1.066304 | 1.013378 | 1.121995 | 0.013452 |
| SH3TC2   | 1.367463 | 1.255977 | 1.488845 | 5.49E-13 |
| CXCL11   | 1.143591 | 1.054547 | 1.240152 | 0.001178 |
| ZRSR2    | 1.005109 | 0.892762 | 1.131595 | 0.932842 |
| NMD3     | 0.932011 | 0.85512  | 1.015818 | 0.108994 |
| ADRB2    | 1.032553 | 0.986348 | 1.080923 | 0.170234 |
| B3GALNT1 | 1.056899 | 0.978043 | 1.142111 | 0.161877 |
| GPRIN1   | 1.328145 | 1.221666 | 1.443905 | 2.82E-11 |
| KCNAB1   | 0.998711 | 0.936119 | 1.065488 | 0.968837 |
| MRPL1    | 1.00454  | 0.917831 | 1.09944  | 0.921663 |
| SHE      | 0.955355 | 0.854384 | 1.068257 | 0.422904 |
| PGM2     | 1.043699 | 0.968165 | 1.125126 | 0.264467 |
| P2RY12   | 1.201249 | 1.144883 | 1.260391 | 7.56E-14 |
| SLC33A1  | 1.048211 | 0.963415 | 1.140471 | 0.273956 |
| SNUPN    | 1.141353 | 1.021177 | 1.275671 | 0.019852 |
| CRADD    | 1.222214 | 1.13679  | 1.314058 | 5.70E-08 |
| SIN3A    | 0.988489 | 0.910881 | 1.07271  | 0.781381 |
| ARL13B   | 1.288344 | 1.146736 | 1.447439 | 2.00E-05 |
| RNASE2   | 0.980731 | 0.951998 | 1.01033  | 0.199652 |
| RNASE3   | 0.980363 | 0.952885 | 1.008634 | 0.171537 |
| PTK2     | 1.073644 | 1.019299 | 1.130887 | 0.007335 |
| PTAFR    | 1.066992 | 1.023537 | 1.112292 | 0.002239 |
| PTPN9    | 1.13363  | 1.037824 | 1.238279 | 0.005368 |
| RNASE6   | 0.999119 | 0.961747 | 1.037943 | 0.96386  |
| SCN9A    | 1.185216 | 1.119145 | 1.255189 | 6.39E-09 |
| SDC2     | 1.087738 | 1.041755 | 1.13575  | 0.000136 |
| CD52     | 0.992301 | 0.956927 | 1.028983 | 0.676449 |
| MMGT1    | 0.883597 | 0.812661 | 0.960724 | 0.003751 |
| TM2D2    | 1.072235 | 0.959826 | 1.197809 | 0.217086 |
| HTRA4    | 1.035889 | 0.950817 | 1.128574 | 0.419979 |
| PLEKHA2  | 0.946804 | 0.879252 | 1.019547 | 0.14779  |
| CLIC4    | 0.973346 | 0.917025 | 1.033127 | 0.374359 |
| GPR183   | 0.937933 | 0.890256 | 0.988162 | 0.016069 |
| CCDC8    | 0.867712 | 0.772601 | 0.974531 | 0.016598 |
| ZEB2     | 1.004158 | 0.94714  | 1.064608 | 0.889356 |
| PCBP1    | 0.912301 | 0.836751 | 0.994673 | 0.037427 |
| HINT1    | 0.884662 | 0.81048  | 0.965634 | 0.006096 |
| DTWD2    | 1.039681 | 0.95803  | 1.128291 | 0.351078 |
| VPREB1   | 1.081604 | 1.034145 | 1.131242 | 0.000611 |
| CLIC3    | 1.137711 | 1.061145 | 1.219801 | 0.000284 |
| INO80E   | 1.153769 | 1.035015 | 1.286148 | 0.009852 |
| DFFB     | 1.007879 | 0.941447 | 1.078998 | 0.821517 |
| NFU1     | 0.975737 | 0.862007 | 1.104472 | 0.697678 |
| CKAP2L   | 1.188304 | 1.109836 | 1.27232  | 7.43E-07 |
| APLF     | 0.975397 | 0.904338 | 1.05204  | 0.518629 |
| BOLA2B   | 1.212783 | 1.050385 | 1.400288 | 0.008535 |
| RGPD8    | 0.938657 | 0.85675  | 1.028395 | 0.17417  |
| HIC2     | 1.052614 | 0.983437 | 1.126656 | 0.139298 |
| LUZP1    | 0.868393 | 0.823442 | 0.915797 | 1.95E-07 |
| BUB1     | 1.092724 | 1.023894 | 1.16618  | 0.007555 |
| SPNS1    | 1.02795  | 0.93489  | 1.130273 | 0.56911  |

|          |          |          |          |          |
|----------|----------|----------|----------|----------|
| LRRC45   | 1.103092 | 1.030314 | 1.181011 | 0.00484  |
| AGPAT2   | 0.92165  | 0.856079 | 0.992243 | 0.030253 |
| ASPSCR1  | 1.103647 | 1.004271 | 1.212856 | 0.040512 |
| GP9      | 1.059474 | 1.014357 | 1.106597 | 0.009268 |
| FASN     | 1.011998 | 0.952012 | 1.075764 | 0.70204  |
| CNBP     | 1.062443 | 0.957291 | 1.179145 | 0.25466  |
| MT1E     | 1.152807 | 1.105603 | 1.202027 | 2.63E-11 |
| DUS1L    | 1.100564 | 0.988924 | 1.224806 | 0.079109 |
| GPS1     | 1.117406 | 1.007081 | 1.239817 | 0.03635  |
| RFNG     | 1.044435 | 0.931799 | 1.170687 | 0.455229 |
| DCXR     | 1.319099 | 1.210915 | 1.436948 | 2.25E-10 |
| ZNF32    | 1.178665 | 1.071206 | 1.296903 | 0.000751 |
| LDB2     | 1.276107 | 1.096891 | 1.484603 | 0.00159  |
| RAC3     | 0.992023 | 0.925088 | 1.063801 | 0.822206 |
| NRG4     | 1.119508 | 1.066299 | 1.175371 | 5.53E-06 |
| LIMS1    | 1.042399 | 0.962072 | 1.129432 | 0.310148 |
| TAPT1    | 0.983888 | 0.927328 | 1.043899 | 0.590776 |
| UGP2     | 1.019745 | 0.944287 | 1.101234 | 0.618141 |
| HNRNPF   | 0.970336 | 0.885564 | 1.063222 | 0.518524 |
| BTD      | 0.979556 | 0.905625 | 1.059522 | 0.605919 |
| CSGALNA1 | 0.929945 | 0.86728  | 0.997136 | 0.041298 |
| PCDH7    | 1.143623 | 1.065216 | 1.227802 | 0.000213 |
| ROBO1    | 0.930415 | 0.88273  | 0.980675 | 0.007211 |
| AVEN     | 0.836579 | 0.760239 | 0.920586 | 0.000257 |
| P2RY1    | 1.062628 | 1.010371 | 1.117588 | 0.018227 |
| CTNND2   | 1.164748 | 1.083753 | 1.251796 | 3.37E-05 |
| TRIM56   | 1.047272 | 0.974176 | 1.125852 | 0.210855 |
| AHSP     | 0.984428 | 0.957034 | 1.012606 | 0.275732 |
| WNT10B   | 1.10971  | 1.044596 | 1.178884 | 0.00074  |
| REPS2    | 0.991251 | 0.91156  | 1.077908 | 0.837176 |
| SYAP1    | 0.925171 | 0.847456 | 1.010014 | 0.08232  |
| ITGAM    | 1.078996 | 1.034001 | 1.125948 | 0.000468 |
| PYDC1    | 0.974583 | 0.916947 | 1.035843 | 0.407816 |
| TPST1    | 0.995738 | 0.94381  | 1.050522 | 0.875795 |
| TOR1AIP2 | 0.922249 | 0.863728 | 0.984735 | 0.015527 |
| S100G    | 0.986452 | 0.888958 | 1.094638 | 0.797245 |
| TM4SF1   | 0.95806  | 0.912717 | 1.005655 | 0.083271 |
| OTUD3    | 1.069655 | 0.985752 | 1.1607   | 0.106174 |
| GUSB     | 0.984513 | 0.90166  | 1.07498  | 0.727851 |
| BRD3     | 1.044454 | 0.950201 | 1.148056 | 0.367396 |
| KLF13    | 1.014751 | 0.947087 | 1.087249 | 0.677482 |
| ZFPM2    | 1.126215 | 1.044891 | 1.213867 | 0.001882 |
| ZNF764   | 1.01739  | 0.926708 | 1.116945 | 0.717392 |
| ZNF747   | 1.125661 | 1.0181   | 1.244585 | 0.020887 |
| ZNF768   | 1.04163  | 0.968569 | 1.120202 | 0.27166  |
| TAS1R3   | 1.027841 | 0.944691 | 1.118309 | 0.523468 |
| TMEM42   | 1.18715  | 1.077313 | 1.308185 | 0.000533 |
| MAP3K2   | 0.935935 | 0.8767   | 0.999171 | 0.047165 |
| PUSL1    | 1.120183 | 1.005721 | 1.247672 | 0.039047 |
| SF3B5    | 0.995001 | 0.917583 | 1.078951 | 0.903477 |
| ZNF35    | 0.967533 | 0.906858 | 1.032267 | 0.31785  |
| IFFO2    | 1.083234 | 1.023322 | 1.146654 | 0.005885 |
| NLGN2    | 1.101235 | 1.031404 | 1.175793 | 0.003913 |
| MYO7B    | 1.047721 | 0.992407 | 1.106118 | 0.092074 |
| CHD3     | 1.156256 | 1.070111 | 1.249336 | 0.000238 |
| TMEM154  | 1.056162 | 0.997811 | 1.117924 | 0.059511 |
| MYRIP    | 1.140781 | 1.049613 | 1.239867 | 0.001939 |
| ALCAM    | 1.047676 | 0.992372 | 1.106061 | 0.09233  |

|          |          |          |          |          |
|----------|----------|----------|----------|----------|
| YWHAG    | 0.981328 | 0.919552 | 1.047253 | 0.569906 |
| UBE2E3   | 1.007014 | 0.950996 | 1.066333 | 0.810823 |
| CNTROB   | 0.937249 | 0.871507 | 1.00795  | 0.080717 |
| TRAPPC1  | 1.078058 | 0.987667 | 1.176722 | 0.092526 |
| KCNAB3   | 1.113215 | 1.010069 | 1.226895 | 0.030625 |
| FAM153A  | 1.166079 | 0.993383 | 1.368798 | 0.060274 |
| GPR37L1  | 0.970237 | 0.895716 | 1.050957 | 0.458678 |
| TMEM192  | 1.091817 | 0.992083 | 1.201576 | 0.072282 |
| ZNF778   | 1.084672 | 0.989092 | 1.189488 | 0.08418  |
| NIPA1    | 1.165867 | 1.107626 | 1.22717  | 4.37E-09 |
| FOXD4    | 1.167394 | 1.049697 | 1.298288 | 0.004311 |
| GPR25    | 1.1299   | 1.069092 | 1.194167 | 1.51E-05 |
| UBE2E1   | 0.873793 | 0.817794 | 0.933627 | 6.54E-05 |
| HNRNPA3  | 0.940148 | 0.857741 | 1.030471 | 0.187286 |
| SIK2     | 1.009569 | 0.929649 | 1.09636  | 0.820946 |
| RNF150   | 1.365379 | 1.269786 | 1.468168 | 4.12E-17 |
| CCDC144A | 0.999405 | 0.934847 | 1.06842  | 0.986053 |
| CHRNB1   | 0.988841 | 0.912451 | 1.071626 | 0.784416 |
| GYP A    | 1.015461 | 0.973556 | 1.05917  | 0.475498 |
| USP38    | 1.006638 | 0.933859 | 1.085089 | 0.862814 |
| SLC16A5  | 0.969401 | 0.900752 | 1.043282 | 0.406941 |
| NANP     | 1.157683 | 1.050818 | 1.275415 | 0.003046 |
| PWWP2A   | 1.058587 | 0.966767 | 1.159128 | 0.218743 |
| USP50    | 0.93805  | 0.858763 | 1.024657 | 0.155793 |
| USP47    | 0.975536 | 0.907134 | 1.049096 | 0.504283 |
| PDCD6IP  | 1.001466 | 0.915554 | 1.09544  | 0.974466 |
| ZNF212   | 1.023931 | 0.947269 | 1.106797 | 0.551433 |
| MRAP     | 1.073467 | 0.942393 | 1.222771 | 0.285984 |
| FAM161A  | 1.136476 | 1.020853 | 1.265194 | 0.01944  |
| ZNF282   | 0.938752 | 0.870032 | 1.0129   | 0.103207 |
| GLB1     | 1.043311 | 0.961138 | 1.13251  | 0.311071 |
| CRTAP    | 0.924326 | 0.853551 | 1.000969 | 0.052852 |
| CNGB3    | 1.320906 | 1.149157 | 1.518323 | 8.99E-05 |
| CMTM8    | 0.953886 | 0.88726  | 1.025515 | 0.201264 |
| GABARAP  | 0.955427 | 0.871069 | 1.047955 | 0.333648 |
| STX8     | 1.136336 | 1.028011 | 1.256074 | 0.012404 |
| UBB      | 0.985997 | 0.893484 | 1.088088 | 0.779061 |
| NFRKB    | 0.999988 | 0.921588 | 1.085059 | 0.999779 |
| FABP4    | 1.047457 | 0.960011 | 1.142868 | 0.297217 |
| PRDM10   | 0.946612 | 0.878873 | 1.019571 | 0.147525 |
| B3GNT2   | 1.006236 | 0.935297 | 1.082556 | 0.867633 |
| FOS      | 0.99969  | 0.945877 | 1.056565 | 0.991249 |
| TMED10   | 1.144405 | 1.048178 | 1.249465 | 0.002613 |
| SETMAR   | 1.033966 | 0.947972 | 1.127761 | 0.450886 |
| SMAD1    | 0.993389 | 0.933613 | 1.056991 | 0.834065 |
| EMX2     | 1.075129 | 0.978466 | 1.181342 | 0.131792 |
| SP7      | 1.104432 | 1.033045 | 1.180753 | 0.003573 |
| LRRN2    | 1.087426 | 1.015304 | 1.164671 | 0.016677 |
| SLC30A1  | 1.043917 | 0.978252 | 1.113991 | 0.19476  |
| DCLK2    | 1.048884 | 0.980827 | 1.121663 | 0.163205 |
| ZNF804A  | 0.879059 | 0.823258 | 0.938642 | 0.000117 |
| GPRC5C   | 1.080318 | 1.002502 | 1.164175 | 0.042818 |
| TMEM182  | 1.19833  | 1.076142 | 1.334392 | 0.000976 |
| KRT8     | 1.014837 | 0.957893 | 1.075166 | 0.617161 |
| ADORA2B  | 1.008134 | 0.938013 | 1.083498 | 0.825675 |
| MGMT     | 0.949232 | 0.877303 | 1.027059 | 0.195013 |
| METTL7B  | 1.129098 | 1.090311 | 1.169265 | 9.91E-12 |
| NFXL1    | 0.999916 | 0.924714 | 1.081233 | 0.998316 |

|          |          |          |          |          |
|----------|----------|----------|----------|----------|
| DENND5B  | 0.930979 | 0.867101 | 0.999563 | 0.048608 |
| CD14     | 1.010701 | 0.979769 | 1.04261  | 0.50209  |
| DNAJC18  | 1.025195 | 0.937661 | 1.1209   | 0.584766 |
| RALGAPB  | 1.00025  | 0.929569 | 1.076305 | 0.99467  |
| SLC23A1  | 0.971311 | 0.906535 | 1.040715 | 0.408436 |
| KRT72    | 1.062272 | 0.988585 | 1.141453 | 0.099566 |
| KISS1    | 1.179878 | 1.091713 | 1.275163 | 2.99E-05 |
| NUDT9    | 1.118148 | 1.011651 | 1.235857 | 0.028758 |
| HSD17B13 | 0.895273 | 0.828086 | 0.967911 | 0.005446 |
| PA2G4    | 1.088665 | 0.977775 | 1.212132 | 0.121163 |
| ELOVL6   | 1.1024   | 1.033169 | 1.176269 | 0.003219 |
| PFKFB3   | 0.981765 | 0.930538 | 1.035813 | 0.500909 |
| ARL6IP1  | 1.0012   | 0.921843 | 1.087388 | 0.977298 |
| SERPINB9 | 0.967779 | 0.921865 | 1.015979 | 0.1866   |
| SMAGP    | 0.987817 | 0.920638 | 1.059898 | 0.733017 |
| IRX1     | 0.875303 | 0.834966 | 0.917589 | 3.15E-08 |
| CDH2     | 1.089565 | 0.988279 | 1.201231 | 0.084866 |
| EMB      | 1.046182 | 0.987681 | 1.108149 | 0.124107 |
| STAT2    | 1.071257 | 1.002191 | 1.145082 | 0.042935 |
| NUDCD2   | 0.963582 | 0.873144 | 1.063388 | 0.460672 |
| IRF2BP1  | 0.982683 | 0.913121 | 1.057543 | 0.640957 |
| HSPA4    | 1.035042 | 0.94303  | 1.136031 | 0.468396 |
| COMMD5   | 1.130709 | 1.026847 | 1.245075 | 0.012459 |
| GTSF1    | 0.947095 | 0.912626 | 0.982865 | 0.004057 |
| DPY19L2P | 1.069241 | 1.003981 | 1.138744 | 0.037195 |
| ZNF16    | 1.13813  | 1.015974 | 1.274975 | 0.025514 |
| ARMC10   | 1.011684 | 0.934511 | 1.095229 | 0.774167 |
| RNF34    | 1.054708 | 0.972982 | 1.143299 | 0.195537 |
| ACYP2    | 1.112467 | 0.975915 | 1.268126 | 0.110692 |
| TRABD    | 1.089253 | 1.00109  | 1.18518  | 0.047114 |
| ATF7     | 0.960533 | 0.871811 | 1.058284 | 0.415452 |
| SOCS6    | 0.899506 | 0.842889 | 0.959926 | 0.001408 |
| ZNF296   | 1.039163 | 0.957672 | 1.127589 | 0.356544 |
| HOXB9    | 1.036606 | 1.004062 | 1.070205 | 0.027173 |
| TTLL6    | 1.0872   | 0.989482 | 1.194568 | 0.081872 |
| POLH     | 1.071048 | 0.994223 | 1.15381  | 0.070698 |
| KIF5B    | 0.969541 | 0.894288 | 1.051126 | 0.453022 |
| AKAP13   | 0.955994 | 0.897762 | 1.018003 | 0.160464 |
| CDCA4    | 1.043916 | 0.96281  | 1.131855 | 0.297627 |
| CHCHD7   | 1.269665 | 1.159176 | 1.390685 | 2.75E-07 |
| HTRA3    | 1.096756 | 1.052216 | 1.143182 | 1.26E-05 |
| FOXN2    | 1.010924 | 0.931282 | 1.097377 | 0.795245 |
| LMOD2    | 0.979989 | 0.924897 | 1.038363 | 0.493509 |
| USP32    | 1.03564  | 0.964578 | 1.111937 | 0.33426  |
| CEL      | 1.214775 | 1.125376 | 1.311276 | 6.09E-07 |
| PPM1D    | 0.986667 | 0.914676 | 1.064323 | 0.728404 |
| GPR27    | 1.019408 | 0.981595 | 1.058677 | 0.318899 |
| KBTBD2   | 0.986873 | 0.914004 | 1.065552 | 0.735647 |
| TRIAP1   | 0.952281 | 0.868873 | 1.043695 | 0.295794 |
| LSM3     | 1.054349 | 0.95699  | 1.161613 | 0.284337 |
| KIAA0232 | 0.980774 | 0.911933 | 1.054811 | 0.601083 |
| MTSS1    | 0.924936 | 0.879759 | 0.972433 | 0.002257 |
| TMEM43   | 0.995212 | 0.916944 | 1.080162 | 0.908578 |
| RNF139   | 0.983476 | 0.907168 | 1.066201 | 0.68595  |
| RPS9     | 0.935064 | 0.841121 | 1.0395   | 0.213925 |
| PLA2G1B  | 0.959918 | 0.859464 | 1.072113 | 0.468253 |
| CYTL1    | 0.930745 | 0.904526 | 0.957724 | 8.53E-07 |
| TSEN34   | 1.290662 | 1.153228 | 1.444474 | 8.92E-06 |



|          |          |          |          |          |
|----------|----------|----------|----------|----------|
| TRH      | 0.897206 | 0.873653 | 0.921394 | 1.33E-15 |
| GSTA4    | 1.336005 | 1.240316 | 1.439076 | 2.18E-14 |
| NDUFA3   | 1.134309 | 1.052761 | 1.222173 | 0.000931 |
| OSCAR    | 0.950876 | 0.914729 | 0.988453 | 0.010856 |
| PAQR8    | 1.129828 | 1.070069 | 1.192925 | 1.07E-05 |
| NUDT6    | 1.228748 | 1.098281 | 1.374714 | 0.000322 |
| TANC2    | 1.169363 | 1.095618 | 1.248072 | 2.51E-06 |
| DNAJC24  | 1.196321 | 1.071834 | 1.335265 | 0.001387 |
| ZNF160   | 1.02601  | 0.952387 | 1.105324 | 0.49911  |
| ZNF415   | 1.025175 | 0.932926 | 1.126546 | 0.605286 |
| CEACAM3  | 1.067052 | 1.018615 | 1.117792 | 0.00618  |
| PDGFD    | 1.241448 | 1.170422 | 1.316783 | 6.24E-13 |
| S1PR1    | 0.936969 | 0.892437 | 0.983723 | 0.00878  |
| PKIA     | 1.138116 | 1.06027  | 1.221677 | 0.000345 |
| XKR6     | 1.16351  | 1.055134 | 1.283018 | 0.002399 |
| TSNARE1  | 1.055956 | 0.988072 | 1.128504 | 0.108272 |
| FPR2     | 1.050674 | 0.996975 | 1.107264 | 0.064779 |
| FPR1     | 1.000418 | 0.966108 | 1.035948 | 0.981253 |
| FEZ2     | 1.017229 | 0.937124 | 1.104181 | 0.683137 |
| SOX7     | 1.116962 | 0.962575 | 1.296113 | 0.145007 |
| ALK      | 1.008931 | 0.882365 | 1.15365  | 0.896561 |
| MTM1     | 0.940441 | 0.866791 | 1.020349 | 0.139992 |
| INSR     | 1.040148 | 0.983465 | 1.100098 | 0.168573 |
| MFN1     | 0.986694 | 0.921679 | 1.056296 | 0.700119 |
| GIMAP8   | 1.037781 | 0.974341 | 1.105352 | 0.2492   |
| NRTN     | 1.034591 | 0.937808 | 1.141362 | 0.497387 |
| KCNMB3   | 0.983899 | 0.875099 | 1.106226 | 0.786023 |
| FUT3     | 1.022333 | 0.955405 | 1.09395  | 0.522572 |
| ATP6V0E2 | 1.33178  | 1.219855 | 1.453976 | 1.58E-10 |
| PRKCE    | 1.091427 | 1.026768 | 1.160158 | 0.004989 |
| JAGN1    | 1.149098 | 1.040033 | 1.2696   | 0.006306 |
| TADA3    | 1.227084 | 1.11753  | 1.347377 | 1.80E-05 |
| SOCS5    | 0.90538  | 0.832235 | 0.984953 | 0.020738 |
| C1GALT1C | 1.115794 | 1.03393  | 1.204139 | 0.004829 |
| MORN4    | 1.527676 | 1.374622 | 1.697771 | 3.63E-15 |
| ZNF672   | 0.999533 | 0.926174 | 1.078702 | 0.99041  |
| ZNF692   | 1.113989 | 1.038255 | 1.195248 | 0.002656 |
| NAIF1    | 1.086191 | 0.977399 | 1.207093 | 0.124681 |
| RBKS     | 1.066344 | 0.990333 | 1.148189 | 0.088663 |
| GRIK1    | 0.939592 | 0.856105 | 1.03122  | 0.189376 |
| TMEM126  | 0.868091 | 0.79317  | 0.950088 | 0.002128 |
| TMEM126L | 1.130417 | 1.014826 | 1.259175 | 0.025923 |
| TRIM8    | 1.222869 | 1.134109 | 1.318577 | 1.66E-07 |
| NETO2    | 0.928766 | 0.86603  | 0.996047 | 0.038362 |
| CLDN20   | 0.995664 | 0.941182 | 1.053299 | 0.879687 |
| CDC42BPC | 1.062076 | 0.987454 | 1.142338 | 0.105171 |
| SCAND1   | 0.986928 | 0.888435 | 1.09634  | 0.806224 |
| JUNB     | 0.942821 | 0.879511 | 1.010689 | 0.096879 |
| TMEM37   | 0.94493  | 0.779874 | 1.144918 | 0.563058 |
| LRG1     | 1.11984  | 1.062787 | 1.179956 | 2.21E-05 |
| SHCBP1   | 1.067464 | 0.997767 | 1.142029 | 0.058083 |
| SOSTDC1  | 0.91685  | 0.811896 | 1.03537  | 0.16164  |
| NPTX1    | 0.908284 | 0.82672  | 0.997896 | 0.045089 |
| FAM98B   | 1.026678 | 0.95892  | 1.099223 | 0.449777 |
| ZNF439   | 0.942683 | 0.890813 | 0.997573 | 0.040941 |
| ZNF440   | 0.971974 | 0.908546 | 1.039829 | 0.409023 |
| GAA      | 1.025051 | 0.969191 | 1.08413  | 0.386821 |
| CANT1    | 1.026276 | 0.951233 | 1.107239 | 0.5032   |

|          |          |          |          |          |
|----------|----------|----------|----------|----------|
| ZDHHC16  | 1.047848 | 0.971044 | 1.130726 | 0.228819 |
| CHST11   | 0.958968 | 0.888128 | 1.035458 | 0.284593 |
| EXOSC1   | 1.115157 | 0.962124 | 1.292532 | 0.147823 |
| PGAM1    | 1.062186 | 0.969631 | 1.163575 | 0.194643 |
| CHD7     | 0.963042 | 0.913919 | 1.014806 | 0.158613 |
| ESCO2    | 1.230298 | 1.135944 | 1.332489 | 3.56E-07 |
| KRT19    | 0.895562 | 0.678755 | 1.181622 | 0.43543  |
| CLCN5    | 1.351147 | 1.25356  | 1.456332 | 3.60E-15 |
| TPPP     | 0.929011 | 0.85578  | 1.008509 | 0.078797 |
| KCND3    | 0.990326 | 0.874301 | 1.121747 | 0.878471 |
| APLN     | 0.810197 | 0.734775 | 0.89336  | 2.42E-05 |
| PDE7B    | 1.164835 | 1.057581 | 1.282967 | 0.001962 |
| MRPL36   | 1.230684 | 1.119579 | 1.352815 | 1.71E-05 |
| ZNF581   | 0.845955 | 0.773436 | 0.925274 | 0.000254 |
| NAT1     | 1.244464 | 1.116627 | 1.386936 | 7.66E-05 |
| GLOD5    | 0.959914 | 0.898407 | 1.025632 | 0.225945 |
| ZNF524   | 0.918118 | 0.835313 | 1.009132 | 0.076483 |
| MCC      | 1.004589 | 0.92421  | 1.091959 | 0.914314 |
| ZBTB26   | 0.990371 | 0.92109  | 1.064863 | 0.79371  |
| DSEL     | 1.237648 | 1.125383 | 1.361113 | 1.11E-05 |
| POLR1C   | 1.205353 | 1.09532  | 1.32644  | 0.000131 |
| ASXL1    | 0.955406 | 0.882255 | 1.034622 | 0.261654 |
| DLK2     | 1.079851 | 0.989027 | 1.179015 | 0.08656  |
| ZNF562   | 1.002233 | 0.930534 | 1.079456 | 0.953036 |
| ZNF318   | 1.095032 | 1.015241 | 1.181094 | 0.018682 |
| ZNF561   | 0.977905 | 0.897565 | 1.065436 | 0.609477 |
| WIPF2    | 1.056641 | 0.956412 | 1.167375 | 0.278581 |
| HOPX     | 1.164742 | 1.111896 | 1.220101 | 1.22E-10 |
| LRR8C    | 0.993099 | 0.922794 | 1.068761 | 0.853345 |
| RSL1D1   | 0.881217 | 0.804948 | 0.964711 | 0.006185 |
| LRR8D    | 1.056781 | 0.984256 | 1.134651 | 0.127888 |
| PPID     | 1.158667 | 1.036691 | 1.294996 | 0.009463 |
| COL24A1  | 0.988551 | 0.938519 | 1.041251 | 0.663909 |
| ETFDH    | 1.186839 | 1.081747 | 1.302141 | 0.000293 |
| RXFP1    | 1.036205 | 0.981968 | 1.093438 | 0.194779 |
| LPAR3    | 1.103841 | 1.045886 | 1.165007 | 0.00033  |
| PTGER4   | 0.97279  | 0.917555 | 1.03135  | 0.354984 |
| TBCA     | 0.990736 | 0.905614 | 1.08386  | 0.839093 |
| ECEL1    | 1.101998 | 0.965768 | 1.257445 | 0.14913  |
| BCL2L1   | 1.034019 | 0.976635 | 1.094774 | 0.250818 |
| PLRG1    | 1.138028 | 1.034851 | 1.251493 | 0.007666 |
| ZNF584   | 1.124788 | 1.021554 | 1.238454 | 0.016661 |
| NMUR1    | 1.035354 | 0.990498 | 1.082241 | 0.12418  |
| CLSTN1   | 0.952518 | 0.890241 | 1.01915  | 0.158509 |
| CXXC5    | 1.031794 | 0.973829 | 1.09321  | 0.288694 |
| ZNF274   | 0.895181 | 0.831491 | 0.96375  | 0.003277 |
| PIK3CD   | 0.980555 | 0.916406 | 1.049194 | 0.569461 |
| PTCRA    | 1.001014 | 0.933444 | 1.073475 | 0.977324 |
| SLC25A33 | 0.967169 | 0.885673 | 1.056164 | 0.457313 |
| ENC1     | 1.111392 | 1.043063 | 1.184197 | 0.001105 |
| SPSB1    | 1.061751 | 0.997977 | 1.129599 | 0.057974 |
| P2RY6    | 1.106577 | 1.020517 | 1.199894 | 0.014222 |
| BPTF     | 1.013774 | 0.94075  | 1.092466 | 0.719857 |
| S100Z    | 0.935178 | 0.897361 | 0.97459  | 0.001462 |
| ZIK1     | 1.079908 | 1.008605 | 1.156252 | 0.027397 |
| GPR82    | 1.11284  | 1.017006 | 1.217704 | 0.019966 |
| GPR34    | 0.81094  | 0.751404 | 0.875194 | 7.18E-08 |
| PLEKHG5  | 0.900123 | 0.81381  | 0.995591 | 0.040767 |

|          |          |          |          |          |
|----------|----------|----------|----------|----------|
| ATF7IP   | 0.978652 | 0.909958 | 1.052531 | 0.561132 |
| RGS19    | 1.058947 | 0.991712 | 1.130741 | 0.087027 |
| TCEA2    | 1.168327 | 1.04972  | 1.300336 | 0.004394 |
| HDAC3    | 1.033608 | 0.929109 | 1.14986  | 0.543287 |
| GPHN     | 1.02671  | 0.962823 | 1.094837 | 0.421303 |
| VAT1L    | 1.101065 | 1.043447 | 1.161865 | 0.000447 |
| TMEM51   | 0.943258 | 0.886361 | 1.003806 | 0.065728 |
| CAMTA1   | 1.068969 | 0.946327 | 1.207504 | 0.283413 |
| LGALS4   | 1.102177 | 0.998359 | 1.21679  | 0.053926 |
| LRRC34   | 0.942726 | 0.85142  | 1.043823 | 0.256472 |
| SPATA5L1 | 1.114064 | 1.018586 | 1.218491 | 0.018137 |
| GATM     | 1.019073 | 0.959798 | 1.082007 | 0.536623 |
| RASGRP4  | 1.049445 | 0.983725 | 1.119556 | 0.143557 |
| SLFNL1   | 1.058394 | 0.993561 | 1.127458 | 0.078466 |
| BCL2     | 1.026387 | 0.965609 | 1.090991 | 0.403005 |
| UTF1     | 1.01913  | 0.954882 | 1.087701 | 0.568432 |
| COL8A2   | 1.063012 | 0.997657 | 1.132648 | 0.059091 |
| PWWP2B   | 1.001649 | 0.934048 | 1.074142 | 0.963136 |
| ZNF540   | 1.06269  | 0.971949 | 1.161904 | 0.181817 |
| ANGPTL7  | 1.028443 | 0.964987 | 1.096071 | 0.388072 |
| FBXL14   | 1.056636 | 0.978772 | 1.140693 | 0.158369 |
| EXOSC10  | 1.010138 | 0.924667 | 1.10351  | 0.82305  |
| ZNF570   | 1.106694 | 1.00391  | 1.22     | 0.041507 |
| NINJ2    | 1.220233 | 1.141146 | 1.304802 | 5.82E-09 |
| MLLT3    | 1.047062 | 0.992207 | 1.104949 | 0.093933 |
| FAM90A1  | 1.183637 | 1.066228 | 1.313976 | 0.001561 |
| RRM2     | 1.111324 | 1.04745  | 1.179093 | 0.000474 |
| IFNB1    | 1.096609 | 1.012892 | 1.187245 | 0.022839 |
| RPS21    | 0.923531 | 0.863093 | 0.988202 | 0.021243 |
| C3AR1    | 0.929532 | 0.884181 | 0.977209 | 0.004192 |
| PTEN     | 0.965141 | 0.901596 | 1.033164 | 0.307218 |
| RPS7     | 0.836523 | 0.770209 | 0.908546 | 2.28E-05 |
| RNASEH1  | 1.084737 | 0.994214 | 1.183503 | 0.067331 |
| PRNP     | 0.911818 | 0.854933 | 0.972489 | 0.004973 |
| FRMD5    | 1.061224 | 0.99024  | 1.137297 | 0.092514 |
| CYP4F11  | 0.696274 | 0.60547  | 0.800697 | 3.82E-07 |
| TLN2     | 1.13723  | 1.058349 | 1.22199  | 0.000455 |
| ZNF217   | 0.956726 | 0.890634 | 1.027722 | 0.225794 |
| SCG2     | 1.079728 | 1.00198  | 1.163508 | 0.044235 |
| ATPAF2   | 0.938728 | 0.862179 | 1.022072 | 0.145139 |
| CYP4F22  | 1.229241 | 1.116695 | 1.353129 | 2.52E-05 |
| PPIH     | 1.003202 | 0.894785 | 1.124755 | 0.956312 |
| ZNF57    | 1.096596 | 0.932105 | 1.290115 | 0.26612  |
| JMJD1C   | 0.962598 | 0.908841 | 1.019535 | 0.193558 |
| SYNPO    | 0.976264 | 0.859832 | 1.108462 | 0.710827 |
| MAL      | 1.007117 | 0.950733 | 1.066844 | 0.809362 |
| ZNF554   | 1.058755 | 0.963395 | 1.163553 | 0.235785 |
| RAB33B   | 0.892463 | 0.823173 | 0.967587 | 0.005797 |
| THOP1    | 1.071669 | 0.972937 | 1.18042  | 0.160434 |
| LAMB2    | 0.918464 | 0.88543  | 0.95273  | 5.34E-06 |
| USP19    | 1.024963 | 0.948988 | 1.10702  | 0.530344 |
| ORMDL3   | 0.997265 | 0.924552 | 1.075695 | 0.943466 |
| KLF11    | 0.994633 | 0.948444 | 1.04307  | 0.824444 |
| SMN1     | 0.903215 | 0.816816 | 0.998752 | 0.047223 |
| EIF2AK3  | 0.924038 | 0.870257 | 0.981144 | 0.009818 |
| KRCC1    | 0.993826 | 0.925578 | 1.067106 | 0.864523 |
| NME6     | 1.117292 | 1.026752 | 1.215816 | 0.010104 |
| CYCS     | 0.944262 | 0.87498  | 1.019029 | 0.140178 |

|         |          |          |          |          |
|---------|----------|----------|----------|----------|
| CD8B    | 1.007845 | 0.929863 | 1.092368 | 0.849159 |
| SLFN12  | 1.075021 | 1.003791 | 1.151306 | 0.038628 |
| FRMD3   | 1.061163 | 0.999514 | 1.126615 | 0.051891 |
| SNTB1   | 1.082446 | 1.014515 | 1.154927 | 0.016587 |
| MTBP    | 1.087255 | 0.995659 | 1.187278 | 0.062451 |
| MRPL13  | 1.066827 | 0.954149 | 1.192811 | 0.25602  |
| MALT1   | 1.01345  | 0.947318 | 1.084198 | 0.697991 |
| PRL     | 1.027209 | 0.975621 | 1.081524 | 0.307184 |
| ISG20   | 0.95281  | 0.899054 | 1.00978  | 0.102789 |
| MBOAT1  | 1.001977 | 0.943029 | 1.064609 | 0.949105 |
| GPR22   | 1.000278 | 0.945086 | 1.058692 | 0.992351 |
| CXCR6   | 0.988495 | 0.933725 | 1.046477 | 0.690701 |
| CEBPB   | 1.005894 | 0.947903 | 1.067433 | 0.846192 |
| AZU1    | 0.947356 | 0.919661 | 0.975885 | 0.000354 |
| TPSAB1  | 0.896488 | 0.870575 | 0.923172 | 2.84E-13 |
| PAIP1   | 0.94568  | 0.867733 | 1.030629 | 0.203177 |
| CLEC7A  | 0.983734 | 0.946098 | 1.022866 | 0.409933 |
| C1QTNF4 | 0.92453  | 0.894828 | 0.955217 | 2.48E-06 |
| SERHL   | 1.108881 | 0.975114 | 1.260998 | 0.115087 |
| NEGR1   | 1.05699  | 1.008132 | 1.108215 | 0.02171  |
| ZNF131  | 0.968761 | 0.88938  | 1.055228 | 0.466872 |
| MACROD2 | 0.818096 | 0.725891 | 0.922013 | 0.000999 |
| DPAGT1  | 1.132278 | 1.047972 | 1.223366 | 0.00165  |
| BSG     | 0.976608 | 0.899502 | 1.060323 | 0.572696 |
| HINFP   | 1.083111 | 0.979312 | 1.197912 | 0.120365 |
| SPTLC3  | 0.995384 | 0.911554 | 1.086923 | 0.917902 |
| TP53RK  | 1.22187  | 1.117863 | 1.335553 | 1.01E-05 |
| CLEC12A | 0.960291 | 0.922139 | 1.000022 | 0.050124 |
| BPGM    | 1.006796 | 0.959994 | 1.055881 | 0.78033  |
| POP7    | 1.215055 | 1.11151  | 1.328247 | 1.82E-05 |
| ALG14   | 1.832134 | 1.477744 | 2.271514 | 3.38E-08 |
| SUCLG2  | 1.040868 | 0.989275 | 1.095151 | 0.122531 |
| STARD5  | 1.158257 | 1.045872 | 1.28272  | 0.004784 |
| CSDC2   | 1.004105 | 0.892952 | 1.129095 | 0.945432 |
| IL16    | 1.078718 | 1.001966 | 1.161349 | 0.044206 |
| GNB2    | 0.890216 | 0.817509 | 0.96939  | 0.007471 |
| PDZD3   | 0.936667 | 0.790771 | 1.109482 | 0.44884  |
| C2CD2L  | 1.078833 | 0.974342 | 1.19453  | 0.144322 |
| GNG12   | 1.170427 | 0.974508 | 1.405735 | 0.092243 |
| PRSS27  | 1.170909 | 1.019504 | 1.344798 | 0.025523 |
| DNAJB7  | 1.121151 | 1.00885  | 1.245953 | 0.033705 |
| CLP1    | 1.027831 | 0.941956 | 1.121536 | 0.537455 |
| TTC36   | 0.963432 | 0.889932 | 1.043003 | 0.357536 |
| RSPH9   | 1.140436 | 1.052448 | 1.235779 | 0.001337 |
| GTPBP2  | 0.976168 | 0.90261  | 1.055721 | 0.546221 |
| FGGY    | 1.053924 | 0.945971 | 1.174196 | 0.340807 |
| IL17D   | 0.936458 | 0.78292  | 1.120105 | 0.472418 |
| TCEAL1  | 1.142357 | 1.047081 | 1.246302 | 0.002741 |
| ZNF24   | 1.081935 | 1.000107 | 1.170458 | 0.04969  |
| MANEA   | 1.090864 | 1.000358 | 1.189559 | 0.04906  |
| AGXT    | 0.754803 | 0.675201 | 0.84379  | 7.53E-07 |
| AFF1    | 0.986263 | 0.918953 | 1.058503 | 0.70133  |
| ACOT12  | 1.172278 | 1.048616 | 1.310524 | 0.005197 |
| FIBP    | 1.226779 | 1.103943 | 1.363283 | 0.000146 |
| BANP    | 1.044634 | 0.954069 | 1.143796 | 0.3453   |
| PPP1CA  | 1.074431 | 0.977013 | 1.181563 | 0.138763 |
| HCFC1   | 0.958834 | 0.886467 | 1.037108 | 0.293747 |
| CTSW    | 1.018338 | 0.97659  | 1.061869 | 0.394861 |

|          |          |          |          |          |
|----------|----------|----------|----------|----------|
| NIPAL4   | 0.962041 | 0.891122 | 1.038604 | 0.321941 |
| PDE3A    | 1.100554 | 1.024114 | 1.1827   | 0.009088 |
| RASGRP1  | 1.010801 | 0.957109 | 1.067504 | 0.699666 |
| KLHL6    | 0.970182 | 0.907353 | 1.037362 | 0.375527 |
| CHCHD1   | 1.146175 | 1.040336 | 1.26278  | 0.005781 |
| MRPL52   | 1.186496 | 1.058684 | 1.329738 | 0.003276 |
| SMPDL3A  | 1.105809 | 1.049382 | 1.16527  | 0.000167 |
| RND1     | 1.047125 | 0.977434 | 1.121784 | 0.190049 |
| RAD9A    | 1.184133 | 1.077373 | 1.301473 | 0.000455 |
| EFEMP2   | 0.977605 | 0.912888 | 1.046911 | 0.516907 |
| OR10AD1  | 1.077122 | 0.970947 | 1.194907 | 0.160581 |
| TMEM134  | 1.11128  | 0.976364 | 1.264839 | 0.1101   |
| ZMAT3    | 0.94108  | 0.886299 | 0.999246 | 0.047188 |
| ZNF738   | 0.987129 | 0.921919 | 1.056952 | 0.710252 |
| SLFN11   | 0.973288 | 0.920472 | 1.029134 | 0.341532 |
| CORO1B   | 0.933201 | 0.857726 | 1.015317 | 0.10812  |
| FUT10    | 1.040094 | 0.964411 | 1.121716 | 0.307804 |
| LRRC20   | 1.232172 | 1.149494 | 1.320798 | 3.83E-09 |
| MUS81    | 1.073745 | 0.981619 | 1.174517 | 0.120036 |
| TMEM217  | 1.106603 | 1.011726 | 1.210379 | 0.02677  |
| ZNF596   | 1.248688 | 1.082354 | 1.440584 | 0.002327 |
| CFL1     | 1.038862 | 0.955509 | 1.129486 | 0.371617 |
| TMCC1    | 1.003587 | 0.919985 | 1.094785 | 0.935698 |
| RAB43    | 0.840036 | 0.776261 | 0.909051 | 1.51E-05 |
| CBWD1    | 1.15378  | 1.034696 | 1.28657  | 0.010064 |
| RAB37    | 1.035773 | 0.976283 | 1.098887 | 0.244167 |
| DCP2     | 0.954986 | 0.891896 | 1.022539 | 0.18657  |
| SNX32    | 1.046994 | 0.98779  | 1.109748 | 0.122033 |
| RPL38    | 0.948234 | 0.886152 | 1.014665 | 0.123913 |
| CYP7B1   | 1.133122 | 1.080196 | 1.188641 | 3.04E-07 |
| RARG     | 1.063564 | 0.98669  | 1.146427 | 0.107419 |
| CES3     | 1.17101  | 1.073702 | 1.277137 | 0.000362 |
| SSH3     | 0.965002 | 0.893249 | 1.04252  | 0.366163 |
| CES2     | 1.084813 | 0.990737 | 1.187821 | 0.078595 |
| PDP2     | 1.078251 | 0.99686  | 1.166287 | 0.059912 |
| SP3      | 0.960211 | 0.889417 | 1.036641 | 0.298781 |
| DMXL1    | 1.004612 | 0.928087 | 1.087447 | 0.909374 |
| ZNF621   | 1.02414  | 0.952427 | 1.101253 | 0.51957  |
| EGFL7    | 0.927854 | 0.895356 | 0.961531 | 3.85E-05 |
| NADSYN1  | 0.996031 | 0.915029 | 1.084204 | 0.926788 |
| DHCR7    | 0.975914 | 0.914112 | 1.041894 | 0.465125 |
| NBEA     | 1.160176 | 1.076883 | 1.249911 | 9.28E-05 |
| RNASEH2C | 1.135532 | 1.04802  | 1.230351 | 0.001895 |
| MYEOV    | 1.325442 | 1.151228 | 1.526019 | 8.90E-05 |
| ANKRD13I | 1.081372 | 1.001729 | 1.167347 | 0.045047 |
| MYD88    | 1.000511 | 0.92372  | 1.083686 | 0.989994 |
| MRGPRD   | 0.971774 | 0.874514 | 1.07985  | 0.594618 |
| OXSR1    | 0.901003 | 0.833021 | 0.974533 | 0.009202 |
| SLC22A13 | 1.030731 | 0.915799 | 1.160086 | 0.615818 |
| PHF8     | 0.95518  | 0.883084 | 1.033161 | 0.252114 |
| LCLAT1   | 1.148137 | 1.062262 | 1.240955 | 0.000496 |
| KAT5     | 1.0231   | 0.92911  | 1.1266   | 0.642298 |
| SH3RF3   | 0.992912 | 0.935595 | 1.053742 | 0.814629 |
| GXYLT2   | 1.012699 | 0.952697 | 1.076481 | 0.685516 |
| HPSE2    | 1.132265 | 1.079718 | 1.187369 | 3.00E-07 |
| DCAKD    | 1.109429 | 1.018495 | 1.208483 | 0.017315 |
| TADA2B   | 1.006239 | 0.935869 | 1.081899 | 0.866474 |
| CCDC96   | 1.139969 | 1.004814 | 1.293303 | 0.041896 |

|          |          |          |          |          |
|----------|----------|----------|----------|----------|
| RELA     | 0.853661 | 0.782649 | 0.931116 | 0.000356 |
| EVC2     | 0.909842 | 0.842936 | 0.982058 | 0.015327 |
| ZNF680   | 1.004994 | 0.935811 | 1.079292 | 0.891106 |
| RXFP4    | 0.976917 | 0.933851 | 1.021969 | 0.309979 |
| HPSE     | 1.071303 | 1.009401 | 1.137002 | 0.023323 |
| COQ2     | 1.054195 | 0.968281 | 1.147733 | 0.223674 |
| HSPA6    | 1.034031 | 0.992056 | 1.077782 | 0.113481 |
| TRMT112  | 1.132801 | 1.031755 | 1.243744 | 0.008904 |
| LRRN3    | 0.989032 | 0.920411 | 1.062768 | 0.763702 |
| ADCK5    | 1.169637 | 1.082926 | 1.263292 | 6.69E-05 |
| NOC3L    | 1.116801 | 1.040197 | 1.199047 | 0.002312 |
| ESRRA    | 1.008367 | 0.935724 | 1.086649 | 0.827103 |
| COMMD1   | 1.183158 | 1.054057 | 1.32807  | 0.00433  |
| RAPH1    | 1.169378 | 1.000876 | 1.366248 | 0.048725 |
| MTX1     | 1.191388 | 1.049165 | 1.35289  | 0.006936 |
| PARP14   | 1.044354 | 0.987948 | 1.10398  | 0.125538 |
| CYSLTR1  | 0.96288  | 0.896575 | 1.034089 | 0.298745 |
| PARP15   | 1.064387 | 0.998946 | 1.134114 | 0.053929 |
| CKS1B    | 1.176799 | 1.080268 | 1.281955 | 0.000193 |
| ABCD2    | 1.226828 | 1.119276 | 1.344713 | 1.26E-05 |
| ABLIM3   | 1.157784 | 1.029301 | 1.302304 | 0.01464  |
| VANGL1   | 1.090044 | 1.025377 | 1.158791 | 0.005726 |
| GLRX     | 1.120825 | 1.019306 | 1.232455 | 0.018538 |
| IQCB1    | 0.974156 | 0.895047 | 1.060256 | 0.544558 |
| GOLGB1   | 1.000326 | 0.929948 | 1.076029 | 0.993022 |
| ZNF483   | 1.141725 | 1.015109 | 1.284133 | 0.027104 |
| PLAC8L1  | 1.208502 | 1.04327  | 1.399904 | 0.011581 |
| SLC2A14  | 1.064163 | 1.004208 | 1.127698 | 0.035562 |
| GPR137   | 1.155596 | 1.024451 | 1.303529 | 0.018622 |
| SNCG     | 1.237016 | 1.102907 | 1.387433 | 0.00028  |
| MMRN2    | 1.236954 | 1.048275 | 1.459593 | 0.011793 |
| TNKS     | 0.966264 | 0.90363  | 1.03324  | 0.315551 |
| ZNF449   | 1.076975 | 0.957069 | 1.211904 | 0.218192 |
| PPP1R3B  | 1.002919 | 0.939854 | 1.070216 | 0.929906 |
| STOX2    | 0.949551 | 0.88182  | 1.022485 | 0.170361 |
| MAP3K11  | 0.980016 | 0.904308 | 1.062063 | 0.622654 |
| TRIB1    | 0.960451 | 0.911256 | 1.012303 | 0.132538 |
| KCNK7    | 0.979885 | 0.919616 | 1.044104 | 0.530398 |
| C1QB     | 1.019778 | 0.975791 | 1.065749 | 0.383975 |
| C1QA     | 1.031544 | 0.991328 | 1.073391 | 0.12585  |
| OLR1     | 0.975    | 0.934199 | 1.017582 | 0.245709 |
| GLIPR1L1 | 1.024249 | 0.917285 | 1.143686 | 0.67028  |
| DAG1     | 1.094588 | 1.01617  | 1.179056 | 0.017177 |
| ARV1     | 1.159186 | 1.078544 | 1.245858 | 5.94E-05 |
| SAA1     | 0.993777 | 0.896624 | 1.101456 | 0.905325 |
| EHBP1L1  | 1.039785 | 0.966862 | 1.118208 | 0.292981 |
| THAP2    | 1.055593 | 0.945961 | 1.17793  | 0.333538 |
| RNF26    | 1.095406 | 0.996226 | 1.204461 | 0.059854 |
| PPP1R14B | 0.890567 | 0.821321 | 0.965652 | 0.005012 |
| SMARCC1  | 0.938441 | 0.867769 | 1.01487  | 0.111729 |
| ZNF417   | 1.045049 | 0.969647 | 1.126315 | 0.248811 |
| PTPRM    | 0.935113 | 0.884258 | 0.988893 | 0.018701 |
| FKBP2    | 1.118008 | 0.981249 | 1.273827 | 0.093813 |
| VEGFB    | 0.965793 | 0.87601  | 1.064779 | 0.484463 |
| TNFRSF10 | 0.912886 | 0.862022 | 0.966752 | 0.001834 |
| MST1     | 1.068304 | 0.998125 | 1.143416 | 0.056671 |
| TNFRSF10 | 1.071003 | 1.017977 | 1.126792 | 0.008105 |
| GMPPB    | 1.027932 | 0.953874 | 1.107738 | 0.47022  |

|          |          |          |          |          |
|----------|----------|----------|----------|----------|
| ZNF622   | 1.101544 | 1.001656 | 1.211392 | 0.046142 |
| CSPG4    | 1.051877 | 1.005278 | 1.100637 | 0.028695 |
| SNX33    | 1.028608 | 0.966654 | 1.094531 | 0.373501 |
| CHD2     | 0.919193 | 0.869741 | 0.971456 | 0.002823 |
| CCDC106  | 1.065166 | 0.978216 | 1.159845 | 0.146214 |
| CCR9     | 0.999461 | 0.935099 | 1.068252 | 0.987327 |
| SULT1B1  | 0.984403 | 0.92952  | 1.042525 | 0.591202 |
| NUDT4    | 1.030961 | 0.956666 | 1.111026 | 0.424266 |
| PC       | 1.135479 | 1.052445 | 1.225063 | 0.001041 |
| NMNAT1   | 1.064913 | 0.977926 | 1.159637 | 0.148021 |
| LRFN4    | 1.071734 | 1.008823 | 1.138568 | 0.024795 |
| SLC19A1  | 1.099158 | 1.018528 | 1.186171 | 0.015005 |
| HSPB7    | 1.21658  | 1.10584  | 1.338411 | 5.67E-05 |
| RCE1     | 1.045451 | 0.945528 | 1.155933 | 0.385842 |
| UQCRH    | 1.053792 | 0.957636 | 1.159602 | 0.283153 |
| TAS1R1   | 0.981754 | 0.920644 | 1.046919 | 0.574386 |
| EIF1AX   | 1.007703 | 0.921637 | 1.101805 | 0.866223 |
| PSMD1    | 1.058959 | 0.966267 | 1.160543 | 0.2203   |
| SUSD5    | 0.941748 | 0.826384 | 1.073217 | 0.368029 |
| HEG1     | 1.185724 | 1.118003 | 1.257548 | 1.37E-08 |
| TOMM20   | 0.970821 | 0.892423 | 1.056106 | 0.49063  |
| AGFG1    | 0.953092 | 0.890445 | 1.020147 | 0.166064 |
| STAT5B   | 0.972129 | 0.90693  | 1.042016 | 0.424859 |
| CD7      | 1.042945 | 0.992971 | 1.095433 | 0.09327  |
| CNP      | 0.998335 | 0.929376 | 1.072412 | 0.963615 |
| JUP      | 0.904334 | 0.870911 | 0.939039 | 1.66E-07 |
| HAP1     | 0.892562 | 0.798165 | 0.998122 | 0.04627  |
| EIF1     | 0.89307  | 0.820377 | 0.972205 | 0.009036 |
| RNF213   | 1.027771 | 0.970904 | 1.08797  | 0.345563 |
| TIGD3    | 1.009849 | 0.926818 | 1.100319 | 0.822844 |
| PLK3     | 1.004579 | 0.942966 | 1.070217 | 0.887507 |
| NET1     | 0.938445 | 0.883256 | 0.997082 | 0.039931 |
| DPY19L1  | 1.058178 | 0.990524 | 1.130454 | 0.093442 |
| PHOSPHO  | 1.036782 | 0.994183 | 1.081207 | 0.091522 |
| ZNF791   | 0.953098 | 0.886433 | 1.024775 | 0.194132 |
| PHC3     | 0.950658 | 0.883624 | 1.022777 | 0.175002 |
| GPR160   | 0.956789 | 0.90161  | 1.015346 | 0.144984 |
| CBX2     | 0.905565 | 0.863475 | 0.949708 | 4.41E-05 |
| SPTBN2   | 0.967228 | 0.905902 | 1.032706 | 0.318763 |
| GOLIM4   | 0.981523 | 0.917388 | 1.050141 | 0.588552 |
| RBM4B    | 1.019629 | 0.95219  | 1.091845 | 0.577687 |
| HOXB2    | 1.0421   | 1.004883 | 1.080695 | 0.026251 |
| SLCO4C1  | 1.017532 | 0.96406  | 1.073971 | 0.52801  |
| RBM4     | 1.012359 | 0.951833 | 1.076734 | 0.696156 |
| UBXN2A   | 0.905704 | 0.831153 | 0.986942 | 0.023829 |
| RAX2     | 1.02201  | 0.872745 | 1.196803 | 0.786953 |
| TCAP     | 0.976723 | 0.917431 | 1.039846 | 0.461053 |
| CCS      | 1.069073 | 0.974899 | 1.172344 | 0.155711 |
| KLHL15   | 0.890924 | 0.835441 | 0.950092 | 0.000431 |
| FBXO45   | 1.113469 | 1.019824 | 1.215713 | 0.016489 |
| NGG5     | 0.958496 | 0.863029 | 1.064524 | 0.428426 |
| SLC25A30 | 1.065528 | 0.988932 | 1.148057 | 0.095405 |
| CD34     | 0.995932 | 0.969989 | 1.02257  | 0.762148 |
| CTSF     | 1.080855 | 1.020079 | 1.145252 | 0.008457 |
| MSRB3    | 0.976356 | 0.93486  | 1.019694 | 0.280215 |
| LEMD3    | 0.999611 | 0.928167 | 1.076553 | 0.991792 |
| TLR10    | 0.900204 | 0.826969 | 0.979924 | 0.015166 |
| TLR1     | 0.962174 | 0.903385 | 1.024788 | 0.23062  |

|          |          |          |          |          |
|----------|----------|----------|----------|----------|
| TLR6     | 0.905631 | 0.849481 | 0.965493 | 0.002403 |
| FAM174A  | 0.994495 | 0.888777 | 1.112788 | 0.923307 |
| RGMB     | 1.083419 | 0.931918 | 1.25955  | 0.297174 |
| FAM53A   | 0.901041 | 0.813954 | 0.997446 | 0.044509 |
| CYB561D1 | 1.078925 | 1.004404 | 1.158974 | 0.037497 |
| ZDHHC24  | 0.992744 | 0.908567 | 1.08472  | 0.872028 |
| SELP     | 1.090599 | 1.045866 | 1.137246 | 4.94E-05 |
| CTU2     | 1.155878 | 1.049203 | 1.273401 | 0.003366 |
| MGA      | 0.973833 | 0.919791 | 1.031051 | 0.362703 |
| ARL13A   | 1.085882 | 0.98073  | 1.202307 | 0.112847 |
| PIGG     | 1.019078 | 0.941544 | 1.102996 | 0.63973  |
| PRPF8    | 0.928351 | 0.858134 | 1.004314 | 0.063928 |
| ADCY6    | 1.104019 | 1.046948 | 1.164202 | 0.000258 |
| PITPNA   | 0.998562 | 0.913291 | 1.091794 | 0.974789 |
| DDX23    | 1.129321 | 1.032966 | 1.234665 | 0.007523 |
| ZNHIT2   | 1.064337 | 0.96736  | 1.171037 | 0.200834 |
| ZBTB4    | 0.89907  | 0.837602 | 0.965048 | 0.003234 |
| TNK1     | 1.123424 | 1.020838 | 1.236318 | 0.017215 |
| ZHX3     | 1.092678 | 1.010039 | 1.182079 | 0.027181 |
| PHLDA3   | 1.117953 | 1.051803 | 1.188263 | 0.00034  |
| SLC16A11 | 1.103477 | 0.940189 | 1.295123 | 0.228152 |
| SLC16A13 | 1.230217 | 1.129395 | 1.34004  | 2.04E-06 |
| STAG3L3  | 0.967396 | 0.904369 | 1.034815 | 0.334871 |
| SLC6A19  | 0.995465 | 0.939172 | 1.055132 | 0.878363 |
| SNHG11   | 1.238261 | 1.088028 | 1.409237 | 0.001202 |
| EXO1     | 1.148098 | 1.072757 | 1.22873  | 6.66E-05 |
| RALGAPA1 | 0.9855   | 0.914698 | 1.061783 | 0.700997 |
| LIG4     | 1.059971 | 0.981596 | 1.144605 | 0.137276 |
| GTF2IRD2 | 0.950449 | 0.84958  | 1.063295 | 0.374642 |
| ABRA     | 0.966186 | 0.859249 | 1.086432 | 0.565437 |
| ATP2A2   | 0.934608 | 0.875936 | 0.997211 | 0.040915 |
| ZWILCH   | 1.117005 | 1.014291 | 1.230121 | 0.024559 |
| RPL4     | 0.841723 | 0.778714 | 0.90983  | 1.42E-05 |
| SNAPC5   | 1.00689  | 0.908791 | 1.115579 | 0.895545 |
| ZCCHC12  | 0.986349 | 0.892321 | 1.090286 | 0.788009 |
| GALNTL6  | 0.997386 | 0.883038 | 1.126541 | 0.966393 |
| LINGO2   | 1.214417 | 1.137666 | 1.296345 | 5.47E-09 |
| BBS1     | 1.030966 | 0.858802 | 1.237644 | 0.743568 |
| DENND4A  | 0.972512 | 0.913763 | 1.035039 | 0.380649 |
| PELI3    | 1.267821 | 1.163737 | 1.381215 | 5.66E-08 |
| TTC9B    | 1.262279 | 1.097994 | 1.451144 | 0.00106  |
| MYO1H    | 1.038029 | 0.904828 | 1.190839 | 0.594266 |
| TMEM81   | 1.019209 | 0.924515 | 1.123602 | 0.702137 |
| MRPL11   | 1.091647 | 0.993634 | 1.199328 | 0.067714 |
| IL20RB   | 0.957512 | 0.875043 | 1.047754 | 0.344756 |
| AKIRIN1  | 0.913436 | 0.842653 | 0.990165 | 0.027798 |
| MSL2     | 0.963579 | 0.896787 | 1.035346 | 0.311422 |
| ZNF497   | 0.988777 | 0.896471 | 1.090588 | 0.821424 |
| CMKLR1   | 1.022909 | 0.935549 | 1.118426 | 0.618987 |
| ANGEL2   | 1.069385 | 0.987677 | 1.157853 | 0.098085 |
| UGT8     | 0.942374 | 0.855914 | 1.037568 | 0.226727 |
| KY       | 1.156813 | 1.043849 | 1.282001 | 0.00546  |
| IQCK     | 1.001109 | 0.842733 | 1.189248 | 0.989939 |
| ZNF266   | 0.980321 | 0.91406  | 1.051386 | 0.577794 |
| SLC29A2  | 1.221436 | 1.133141 | 1.316611 | 1.74E-07 |
| BRSK2    | 1.174049 | 1.046676 | 1.316922 | 0.006171 |
| TMEM167  | 1.058228 | 0.971272 | 1.152969 | 0.195775 |
| SH3PXD2E | 1.089275 | 1.027658 | 1.154587 | 0.003998 |



|          |          |          |          |          |
|----------|----------|----------|----------|----------|
| LARP7    | 0.991895 | 0.890407 | 1.104952 | 0.88253  |
| FGFBP3   | 1.170271 | 1.073801 | 1.275409 | 0.000341 |
| NR1D2    | 1.010229 | 0.950034 | 1.074238 | 0.745422 |
| BRMS1    | 1.027187 | 0.908933 | 1.160825 | 0.667305 |
| RPL15    | 0.879945 | 0.809226 | 0.956844 | 0.002772 |
| HRAS     | 1.160953 | 1.0497   | 1.283997 | 0.003688 |
| WDR49    | 1.039452 | 0.998356 | 1.08224  | 0.060108 |
| SRP72    | 0.99641  | 0.907513 | 1.094015 | 0.939867 |
| PCP2     | 1.010347 | 0.945462 | 1.079684 | 0.761165 |
| RIN1     | 0.976257 | 0.911297 | 1.045848 | 0.49399  |
| THAP6    | 1.126363 | 1.023218 | 1.239907 | 0.015167 |
| CEP135   | 1.015376 | 0.937064 | 1.100234 | 0.709429 |
| FZD4     | 1.011552 | 0.87209  | 1.173315 | 0.879388 |
| CD248    | 0.875703 | 0.813323 | 0.942869 | 0.000431 |
| PDZK1    | 1.061568 | 0.948222 | 1.188463 | 0.29969  |
| PDE12    | 1.051034 | 0.95834  | 1.152694 | 0.290681 |
| GLMN     | 0.999538 | 0.926351 | 1.078508 | 0.990499 |
| YIF1A    | 1.093076 | 0.990026 | 1.206852 | 0.078146 |
| CNIH2    | 1.017993 | 0.944348 | 1.097382 | 0.641607 |
| NLRP6    | 1.071293 | 1.006665 | 1.14007  | 0.030066 |
| NDUFA11  | 1.181595 | 1.077274 | 1.296017 | 0.000403 |
| RSRC1    | 1.091631 | 1.008615 | 1.181479 | 0.029815 |
| RAB1B    | 0.984015 | 0.885659 | 1.093294 | 0.764245 |
| PTDSS2   | 0.925784 | 0.844663 | 1.014696 | 0.099321 |
| SEZ6L2   | 1.164557 | 1.05889  | 1.280769 | 0.001695 |
| ASPHD1   | 1.12702  | 0.971966 | 1.306811 | 0.113323 |
| KCTD13   | 1.119558 | 1.014803 | 1.235126 | 0.024251 |
| P2RY14   | 1.116531 | 1.065442 | 1.170071 | 3.98E-06 |
| AMZ1     | 1.031712 | 0.963103 | 1.105208 | 0.373902 |
| GPR171   | 1.151524 | 1.099782 | 1.205701 | 1.80E-09 |
| FUT1     | 0.974327 | 0.906348 | 1.047405 | 0.480929 |
| DHX36    | 0.968127 | 0.901088 | 1.040155 | 0.376321 |
| FBXW8    | 1.072501 | 0.993657 | 1.157601 | 0.072394 |
| KLC2     | 1.165521 | 1.082712 | 1.254664 | 4.63E-05 |
| SLC22A1  | 1.17972  | 1.09316  | 1.273134 | 2.13E-05 |
| CTBP2    | 0.985119 | 0.916875 | 1.058443 | 0.682313 |
| CHST2    | 1.086262 | 1.030661 | 1.144863 | 0.002025 |
| ZDHHC14  | 1.060054 | 0.979738 | 1.146954 | 0.146848 |
| ATR      | 1.033567 | 0.958791 | 1.114175 | 0.388867 |
| UBE2C    | 1.138479 | 1.06797  | 1.213644 | 7.01E-05 |
| GK5      | 1.019246 | 0.940618 | 1.104448 | 0.641642 |
| VCPIP1   | 1.046659 | 0.972445 | 1.126536 | 0.224243 |
| DES      | 0.963702 | 0.897849 | 1.034385 | 0.305917 |
| PDIK1L   | 1.039996 | 0.965388 | 1.120369 | 0.301822 |
| RAG2     | 1.199668 | 1.100084 | 1.308267 | 3.83E-05 |
| TRAF6    | 0.989675 | 0.917815 | 1.067162 | 0.787278 |
| ZNF654   | 1.048871 | 0.975422 | 1.127851 | 0.197695 |
| MRPS22   | 0.929959 | 0.834062 | 1.036882 | 0.190971 |
| PACS1    | 0.816011 | 0.751294 | 0.886303 | 1.42E-06 |
| WFDC5    | 0.962619 | 0.874186 | 1.059998 | 0.438416 |
| MARCKSL1 | 0.906871 | 0.856039 | 0.960721 | 0.000895 |
| SH3BP5L  | 0.96294  | 0.90719  | 1.022115 | 0.214574 |
| YPEL2    | 0.904645 | 0.84888  | 0.964074 | 0.002022 |
| ABO      | 1.078307 | 1.037006 | 1.121252 | 0.000155 |
| PSMD2    | 1.057892 | 0.957741 | 1.168515 | 0.267404 |
| FAM131A  | 0.978291 | 0.891648 | 1.073354 | 0.642745 |
| CSRP2    | 0.942372 | 0.890154 | 0.997653 | 0.041276 |
| INHBC    | 0.968974 | 0.862006 | 1.089216 | 0.597442 |

|          |          |          |          |          |
|----------|----------|----------|----------|----------|
| PARL     | 1.200408 | 1.077924 | 1.336811 | 0.00088  |
| DDIT3    | 0.909302 | 0.84915  | 0.973715 | 0.006474 |
| PCCA     | 1.144042 | 1.080899 | 1.210872 | 3.39E-06 |
| DCTN2    | 0.975758 | 0.870334 | 1.093952 | 0.67399  |
| NPPA     | 0.978757 | 0.900915 | 1.063324 | 0.611577 |
| ZNF408   | 0.976146 | 0.897205 | 1.062032 | 0.574696 |
| CTDSP2   | 0.913051 | 0.848668 | 0.982319 | 0.014764 |
| CKAP5    | 1.07683  | 1.006284 | 1.152322 | 0.032261 |
| ARHGAP1  | 1.095966 | 1.000018 | 1.201119 | 0.049955 |
| MED16    | 1.029937 | 0.948899 | 1.117896 | 0.480515 |
| GOLGA8A  | 1.078031 | 1.030086 | 1.128207 | 0.001208 |
| TP53I11  | 1.061156 | 1.003706 | 1.121895 | 0.036598 |
| DOLK     | 1.057182 | 0.973342 | 1.148244 | 0.187159 |
| PHYHD1   | 0.819485 | 0.747249 | 0.898704 | 2.35E-05 |
| CATSPER1 | 0.939554 | 0.868569 | 1.016341 | 0.119809 |
| CCNE2    | 1.162131 | 1.066473 | 1.266369 | 0.000607 |
| CST6     | 1.039193 | 0.932873 | 1.15763  | 0.485096 |
| ZNF519   | 1.129724 | 1.019522 | 1.251837 | 0.019851 |
| LSM1     | 1.210524 | 1.059848 | 1.382622 | 0.004848 |
| BANF1    | 1.123745 | 1.045328 | 1.208046 | 0.001572 |
| APOF     | 1.189242 | 1.055456 | 1.339986 | 0.004422 |
| TMEM9B   | 1.065826 | 0.963223 | 1.179357 | 0.21705  |
| NRIP3    | 1.036313 | 0.980273 | 1.095557 | 0.20856  |
| PTPN2    | 0.951336 | 0.868104 | 1.042547 | 0.28553  |
| EIF1AD   | 1.08377  | 0.994943 | 1.180527 | 0.065218 |
| SMAD2    | 1.122248 | 1.032852 | 1.219382 | 0.006466 |
| EIF3F    | 0.855987 | 0.77693  | 0.943089 | 0.001661 |
| ZNF25    | 1.126304 | 1.026141 | 1.236243 | 0.012314 |
| ARL10    | 1.013436 | 0.944717 | 1.087154 | 0.70948  |
| CLTB     | 1.094286 | 0.981457 | 1.220087 | 0.104621 |
| LPL      | 1.068525 | 1.013526 | 1.126509 | 0.013961 |
| RFESD    | 1.119484 | 1.03224  | 1.214103 | 0.006402 |
| CCDC14   | 1.102387 | 1.029534 | 1.180395 | 0.0052   |
| TBC1D10C | 1.009677 | 0.938716 | 1.086001 | 0.795629 |
| SART1    | 0.885287 | 0.800738 | 0.978763 | 0.017355 |
| PPP2R2D  | 0.934479 | 0.850992 | 1.026157 | 0.155838 |
| MCTP1    | 0.929206 | 0.875924 | 0.985729 | 0.014808 |
| POLD4    | 1.10136  | 0.976473 | 1.24222  | 0.115893 |
| OR52W1   | 0.986126 | 0.884491 | 1.099439 | 0.801235 |
| LRRC25   | 0.985553 | 0.942372 | 1.030713 | 0.524371 |
| DPP10    | 0.981605 | 0.905686 | 1.063888 | 0.65122  |
| CLCF1    | 0.972205 | 0.906952 | 1.042153 | 0.426492 |
| TSGA10IP | 0.922816 | 0.79206  | 1.075157 | 0.302828 |
| GPR152   | 0.940284 | 0.863293 | 1.024142 | 0.157756 |
| UBQLNL   | 1.052236 | 0.948983 | 1.166725 | 0.333918 |
| KCNE3    | 0.96255  | 0.907676 | 1.02074  | 0.202482 |
| CABP4    | 1.074    | 0.997444 | 1.156432 | 0.058475 |
| ALG10B   | 1.071639 | 0.977554 | 1.174778 | 0.140009 |
| DRAP1    | 1.053058 | 0.960896 | 1.154061 | 0.268581 |
| LONRF3   | 0.95511  | 0.909588 | 1.00291  | 0.06528  |
| UCP3     | 1.107181 | 1.013882 | 1.209065 | 0.023395 |
| UCP2     | 1.009749 | 0.935401 | 1.090006 | 0.803654 |
| PAAF1    | 1.140698 | 1.040534 | 1.250505 | 0.004996 |
| MRPL48   | 1.093325 | 0.972509 | 1.22915  | 0.135335 |
| RAB6A    | 1.000309 | 0.905185 | 1.10543  | 0.995161 |
| P2RY2    | 0.962217 | 0.919042 | 1.007422 | 0.100116 |
| FOSL1    | 0.960132 | 0.905664 | 1.017877 | 0.17215  |
| ERCC4    | 1.204209 | 1.081735 | 1.340549 | 0.000685 |

|          |          |          |          |          |
|----------|----------|----------|----------|----------|
| CCDC85B  | 0.956256 | 0.882243 | 1.036477 | 0.276475 |
| TMEM70   | 1.061155 | 0.965442 | 1.166357 | 0.218415 |
| RPS6KB2  | 1.010815 | 0.920397 | 1.110115 | 0.821993 |
| TOM1L2   | 1.06477  | 0.991272 | 1.143719 | 0.085479 |
| ZNF77    | 1.034589 | 0.952632 | 1.123598 | 0.419351 |
| B3GNTL1  | 1.044072 | 0.978401 | 1.114151 | 0.193198 |
| MLXIP    | 0.959161 | 0.883666 | 1.041106 | 0.318825 |
| AURKAIP1 | 1.095643 | 0.980929 | 1.223772 | 0.105506 |
| TTLL11   | 1.162033 | 1.063077 | 1.270201 | 0.000943 |
| TOMM5    | 1.153145 | 1.047977 | 1.268866 | 0.003496 |
| SLC35E3  | 1.004476 | 0.913725 | 1.10424  | 0.926352 |
| ZNF169   | 1.112608 | 1.024966 | 1.207743 | 0.010802 |
| RUVBL1   | 1.127638 | 1.038816 | 1.224055 | 0.004108 |
| SFN      | 1.01713  | 0.94562  | 1.094047 | 0.647924 |
| MSRA     | 0.890096 | 0.816392 | 0.970454 | 0.00829  |
| ETV4     | 1.174611 | 1.064186 | 1.296494 | 0.001398 |
| GAPT     | 0.953321 | 0.903833 | 1.005518 | 0.07881  |
| BAIAP2   | 0.940248 | 0.871784 | 1.014089 | 0.110207 |
| ZDHHC21  | 0.977178 | 0.911003 | 1.048161 | 0.518759 |
| PLEKHF2  | 0.920435 | 0.84835  | 0.998645 | 0.04631  |
| A2M      | 1.077734 | 1.016557 | 1.142593 | 0.012049 |
| ARL4D    | 1.121515 | 1.046347 | 1.202082 | 0.001196 |
| DOK7     | 0.949772 | 0.874829 | 1.031136 | 0.219133 |
| LRRN1    | 1.051517 | 0.970297 | 1.139535 | 0.220657 |
| UBE2O    | 1.089818 | 1.022437 | 1.16164  | 0.008257 |
| ORAI3    | 0.96392  | 0.885975 | 1.048721 | 0.393005 |
| UNC119B  | 0.901091 | 0.842649 | 0.963586 | 0.002333 |
| DENND2C  | 1.179809 | 1.102138 | 1.262953 | 1.95E-06 |
| ASCL3    | 0.916006 | 0.800821 | 1.047758 | 0.200704 |
| TUBB6    | 0.940287 | 0.894983 | 0.987885 | 0.014536 |
| LYSMD3   | 0.956318 | 0.889549 | 1.028099 | 0.226459 |
| B3GALT6  | 1.080895 | 1.01335  | 1.152943 | 0.01814  |
| ZNF613   | 1.032076 | 0.937269 | 1.136474 | 0.520743 |
| JAKMIP2  | 1.263325 | 1.171307 | 1.362572 | 1.38E-09 |
| MBLAC2   | 1.080702 | 0.993217 | 1.175892 | 0.071554 |
| ZNF683   | 0.88097  | 0.79811  | 0.972432 | 0.011915 |
| SLC35A4  | 1.130111 | 1.044608 | 1.222612 | 0.00231  |
| IP6K1    | 0.938964 | 0.881684 | 0.999964 | 0.04987  |
| SSNA1    | 1.063828 | 0.962784 | 1.175477 | 0.224315 |
| CSTF3    | 1.046738 | 0.965316 | 1.135029 | 0.268904 |
| YES1     | 0.967451 | 0.923722 | 1.01325  | 0.160862 |
| CHMP6    | 1.002583 | 0.926711 | 1.084667 | 0.94877  |
| DLEU1    | 0.957778 | 0.876556 | 1.046526 | 0.340016 |
| UFSP1    | 1.167191 | 1.071749 | 1.271133 | 0.000382 |
| TMEM39A  | 0.934822 | 0.865929 | 1.009196 | 0.084421 |
| TCP11L1  | 0.914619 | 0.846935 | 0.987712 | 0.022896 |
| GPX2     | 1.020458 | 0.954897 | 1.090519 | 0.550014 |
| CCDC57   | 0.981046 | 0.91581  | 1.050931 | 0.585728 |
| HSF5     | 1.097327 | 0.998188 | 1.206313 | 0.054553 |
| SPHK1    | 0.99452  | 0.930194 | 1.063295 | 0.872041 |
| BNIP3    | 1.004477 | 0.933452 | 1.080906 | 0.904962 |
| MYPOP    | 1.023794 | 0.928893 | 1.128391 | 0.635647 |
| ATAD5    | 1.04895  | 0.97327  | 1.130514 | 0.210995 |
| ZNF404   | 1.113739 | 1.008419 | 1.230059 | 0.033555 |
| RTTN     | 1.019111 | 0.951427 | 1.09161  | 0.589268 |
| ACBD7    | 1.298861 | 1.177569 | 1.432647 | 1.72E-07 |
| ANAPC2   | 1.010889 | 0.93842  | 1.088955 | 0.77537  |
| ZBTB8OS  | 1.369671 | 1.194454 | 1.570589 | 6.66E-06 |

|          |          |          |          |          |
|----------|----------|----------|----------|----------|
| ZNF135   | 1.083221 | 0.998924 | 1.174633 | 0.053124 |
| COX8A    | 1.091675 | 1.015614 | 1.173432 | 0.017292 |
| TAC4     | 1.049332 | 0.993274 | 1.108554 | 0.085607 |
| ZSCAN2   | 1.021523 | 0.928251 | 1.124167 | 0.66291  |
| B3GNT4   | 0.957016 | 0.898045 | 1.019858 | 0.175743 |
| CDC26    | 1.028788 | 0.911352 | 1.161355 | 0.646283 |
| HSD11B2  | 0.966294 | 0.896591 | 1.041415 | 0.369395 |
| CRLF3    | 0.975508 | 0.906002 | 1.050347 | 0.510856 |
| RNPEP    | 1.176682 | 1.078751 | 1.283503 | 0.000243 |
| EID2     | 1.02516  | 0.91948  | 1.142987 | 0.654406 |
| EID2B    | 1.252429 | 1.116555 | 1.404838 | 0.000122 |
| KCMF1    | 0.905108 | 0.8222   | 0.996376 | 0.041949 |
| DNAJC30  | 1.190163 | 1.049418 | 1.349784 | 0.006705 |
| SPRYD4   | 1.083819 | 0.990354 | 1.186105 | 0.080238 |
| VPS37D   | 1.117038 | 0.982841 | 1.26956  | 0.090092 |
| CLEC14A  | 0.85619  | 0.798034 | 0.918584 | 1.52E-05 |
| CLK2     | 1.181621 | 1.078433 | 1.294682 | 0.000344 |
| LPCAT4   | 1.002444 | 0.931014 | 1.079354 | 0.948401 |
| SLCO3A1  | 0.997623 | 0.932537 | 1.067253 | 0.94489  |
| ZNF575   | 0.949183 | 0.856248 | 1.052205 | 0.321188 |
| WDR25    | 1.037858 | 0.931632 | 1.156196 | 0.499991 |
| DIRAS1   | 1.015407 | 0.949532 | 1.085852 | 0.655044 |
| PHLDB3   | 1.107487 | 1.018359 | 1.204416 | 0.017082 |
| PRR15    | 0.990632 | 0.91142  | 1.076729 | 0.824821 |
| GNG7     | 1.012343 | 0.94823  | 1.080791 | 0.713246 |
| CNTD1    | 1.086113 | 0.986481 | 1.195808 | 0.092434 |
| KBTBD11  | 1.00402  | 0.961623 | 1.048286 | 0.855381 |
| B3GNT5   | 0.912594 | 0.857709 | 0.970992 | 0.003851 |
| LMNB2    | 1.078917 | 0.999471 | 1.164677 | 0.051606 |
| MEX3C    | 0.897304 | 0.842288 | 0.955913 | 0.000789 |
| RNF152   | 1.085226 | 0.978285 | 1.203858 | 0.1223   |
| MYO1D    | 1.069958 | 1.011605 | 1.131676 | 0.018117 |
| FOXL1    | 0.84711  | 0.764578 | 0.938551 | 0.001511 |
| LRRC37A  | 0.942318 | 0.846597 | 1.048863 | 0.277005 |
| FOXC2    | 0.916369 | 0.799366 | 1.050497 | 0.210161 |
| CCDC121  | 1.044361 | 0.95265  | 1.144901 | 0.354663 |
| ACSF3    | 1.136893 | 1.04894  | 1.23222  | 0.00179  |
| BOK      | 1.260723 | 1.131001 | 1.405322 | 2.89E-05 |
| ZNF843   | 1.20314  | 1.042879 | 1.388028 | 0.011225 |
| TTY14    | 1.017657 | 0.962228 | 1.07628  | 0.54019  |
| PFN4     | 0.977342 | 0.908254 | 1.051685 | 0.540064 |
| CDK5R1   | 1.045611 | 0.985407 | 1.109494 | 0.140455 |
| ZNF285B  | 0.986688 | 0.869512 | 1.119655 | 0.835415 |
| RUFY1    | 1.022432 | 0.940405 | 1.111613 | 0.603122 |
| BASP1    | 1.073722 | 1.033215 | 1.115817 | 0.000289 |
| LRRC37A3 | 1.045368 | 0.955315 | 1.143909 | 0.334373 |
| IRX5     | 1.03361  | 0.987731 | 1.08162  | 0.153564 |
| METRNL   | 1.05606  | 0.997279 | 1.118306 | 0.06194  |
| FAM91A1  | 0.972598 | 0.914592 | 1.034284 | 0.375859 |
| WSB2     | 0.955729 | 0.878645 | 1.039575 | 0.29126  |
| SOX11    | 1.152969 | 1.086525 | 1.223475 | 2.60E-06 |
| TYMS     | 1.055494 | 0.976571 | 1.140796 | 0.173178 |
| PXMP2    | 1.256767 | 1.117469 | 1.41343  | 0.000137 |
| TCEANC   | 1.117456 | 1.01503  | 1.230216 | 0.023567 |
| PNMA1    | 1.067613 | 0.991951 | 1.149046 | 0.081075 |
| ANKLE2   | 0.941935 | 0.865961 | 1.024575 | 0.163273 |
| C8G      | 1.229452 | 1.107463 | 1.36488  | 0.000107 |
| FUT2     | 1.261155 | 1.127877 | 1.410182 | 4.67E-05 |

|          |          |          |          |          |
|----------|----------|----------|----------|----------|
| EFCAB5   | 0.861123 | 0.751269 | 0.98704  | 0.031769 |
| GCNT4    | 1.224405 | 1.13548  | 1.320295 | 1.42E-07 |
| MUC20    | 1.127958 | 1.012129 | 1.257043 | 0.029403 |
| THAP4    | 0.983831 | 0.889548 | 1.088108 | 0.751136 |
| NFATC2IP | 1.063457 | 0.970854 | 1.164893 | 0.185629 |
| FAM89B   | 1.150012 | 1.028824 | 1.285474 | 0.013889 |
| SHMT1    | 1.141726 | 1.046946 | 1.245086 | 0.002722 |
| DPP7     | 1.082587 | 0.992426 | 1.180939 | 0.07368  |
| SEC24C   | 0.974241 | 0.907157 | 1.046286 | 0.473412 |
| SMCR8    | 0.952429 | 0.89375  | 1.014961 | 0.133035 |
| MTHFR    | 1.026712 | 0.957701 | 1.100696 | 0.457758 |
| DEAF1    | 1.178233 | 1.075745 | 1.290484 | 0.000412 |
| MTX3     | 1.1003   | 1.038817 | 1.165423 | 0.001122 |
| TMEM80   | 1.155848 | 1.05085  | 1.271338 | 0.002876 |
| FBXO46   | 1.025225 | 0.937414 | 1.121263 | 0.585551 |
| ZDHHC13  | 1.144531 | 1.060983 | 1.234659 | 0.000482 |
| SLC38A9  | 1.033845 | 0.951212 | 1.123658 | 0.433551 |
| ACER2    | 1.131994 | 1.03335  | 1.240053 | 0.007694 |
| WDR73    | 1.020021 | 0.924971 | 1.12484  | 0.691215 |
| POLE     | 1.036666 | 0.972326 | 1.105263 | 0.270679 |
| SCN4B    | 1.251198 | 1.09561  | 1.428881 | 0.000941 |
| RHOG     | 0.8557   | 0.790436 | 0.926352 | 0.000118 |
| EPS8L2   | 1.235723 | 1.071438 | 1.425198 | 0.003638 |
| ANO6     | 1.041538 | 0.967141 | 1.121657 | 0.281775 |
| ZBTB34   | 0.971421 | 0.908535 | 1.038661 | 0.395819 |
| TALDO1   | 1.072986 | 0.978407 | 1.176708 | 0.134577 |
| ULK1     | 0.954399 | 0.896655 | 1.015861 | 0.142713 |
| RPS6KA3  | 0.983292 | 0.91893  | 1.052163 | 0.625688 |
| B3GNT8   | 1.082792 | 1.010684 | 1.160045 | 0.023685 |
| PUS1     | 1.118272 | 1.022852 | 1.222593 | 0.01403  |
| CHD9     | 0.984113 | 0.916369 | 1.056866 | 0.659881 |
| TRIM72   | 0.964719 | 0.892132 | 1.043212 | 0.368129 |
| MAN1B1   | 1.011039 | 0.925835 | 1.104085 | 0.806909 |
| KCNA3    | 1.082537 | 1.033758 | 1.133617 | 0.000748 |
| FZD8     | 1.163805 | 1.099246 | 1.232155 | 1.89E-07 |
| FBXO39   | 1.230048 | 1.113341 | 1.358988 | 4.68E-05 |
| TOP3A    | 1.064386 | 0.979922 | 1.156129 | 0.139095 |
| CASKIN2  | 0.96327  | 0.892658 | 1.039467 | 0.335333 |
| ZBTB38   | 1.237506 | 1.156946 | 1.323675 | 5.48E-10 |
| FLJ13224 | 0.950956 | 0.909304 | 0.994516 | 0.027765 |
| RPL13AP3 | 0.992607 | 0.873769 | 1.127606 | 0.909189 |
| CCDC71   | 1.002907 | 0.933653 | 1.077299 | 0.936622 |
| LRRN4CL  | 1.000212 | 0.889739 | 1.124401 | 0.997172 |
| FLJ40194 | 1.281181 | 1.121577 | 1.463498 | 0.000262 |
| TIMM22   | 1.155125 | 1.038394 | 1.284978 | 0.007976 |
| HIC1     | 0.962031 | 0.907488 | 1.019852 | 0.193647 |
| PPFIA3   | 1.417982 | 1.306628 | 1.538826 | 5.79E-17 |
| MAGEF1   | 1.163102 | 1.099172 | 1.230749 | 1.62E-07 |
| UMODL1   | 0.879097 | 0.831635 | 0.929267 | 5.35E-06 |
| SAMD9L   | 1.063554 | 1.005652 | 1.12479  | 0.030984 |
| PAWR     | 1.187841 | 1.093989 | 1.289744 | 4.15E-05 |
| TGIF1    | 0.771009 | 0.713873 | 0.832718 | 3.59E-11 |
| NAP1L5   | 1.137241 | 1.039537 | 1.244129 | 0.005016 |
| CD19     | 0.958436 | 0.908702 | 1.010891 | 0.118398 |
| OR2T8    | 1.076375 | 0.99295  | 1.16681  | 0.073762 |
| NR2C2    | 0.985606 | 0.923207 | 1.052222 | 0.663931 |
| ACOT4    | 1.297549 | 1.196312 | 1.407352 | 3.29E-10 |
| ARIH2    | 0.999034 | 0.912366 | 1.093934 | 0.983344 |

|          |          |          |          |          |
|----------|----------|----------|----------|----------|
| RBM44    | 1.00563  | 0.926959 | 1.090978 | 0.892548 |
| ZBTB33   | 1.116028 | 1.039841 | 1.197797 | 0.002343 |
| ZBED2    | 0.906744 | 0.85985  | 0.956196 | 0.000302 |
| IRX3     | 1.070098 | 1.028484 | 1.113395 | 0.000815 |
| OR2B11   | 1.180389 | 1.0507   | 1.326086 | 0.005225 |
| SLC25A22 | 1.037922 | 0.943581 | 1.141695 | 0.443949 |
| RABEP2   | 1.02079  | 0.938899 | 1.109823 | 0.629614 |
| ATOX1    | 0.968753 | 0.871667 | 1.076652 | 0.555729 |
| TBL1XR1  | 0.985528 | 0.92328  | 1.051972 | 0.661445 |
| CD163    | 1.020412 | 0.982371 | 1.059927 | 0.297219 |
| ZNF491   | 1.032065 | 0.936025 | 1.13796  | 0.526524 |
| RPLP2    | 0.903619 | 0.840081 | 0.971961 | 0.00644  |
| JUN      | 0.922919 | 0.877656 | 0.970517 | 0.00177  |
| CSTF2T   | 1.069457 | 0.991413 | 1.153645 | 0.082404 |
| GBA      | 1.064806 | 0.983908 | 1.152355 | 0.119336 |
| ACAD9    | 1.077432 | 0.99658  | 1.164843 | 0.060947 |
| IL17RA   | 1.018169 | 0.969859 | 1.068884 | 0.467847 |
| PNPLA2   | 0.823494 | 0.753358 | 0.900159 | 1.90E-05 |
| MBOAT4   | 1.011439 | 0.921565 | 1.110078 | 0.810665 |
| AGTRAP   | 1.046044 | 0.98906  | 1.106311 | 0.115242 |
| CD163L1  | 1.267965 | 1.159887 | 1.386115 | 1.76E-07 |
| THAP5    | 1.022501 | 0.941514 | 1.110454 | 0.597138 |
| SUMO4    | 1.013759 | 0.948723 | 1.083253 | 0.686249 |
| DNAJC28  | 0.981281 | 0.867806 | 1.109595 | 0.763132 |
| NAALADL  | 1.119882 | 0.984498 | 1.273883 | 0.085014 |
| CD151    | 0.900878 | 0.845068 | 0.960373 | 0.001378 |
| POLR2L   | 1.0261   | 0.959152 | 1.09772  | 0.454187 |
| FAM20C   | 1.093737 | 1.048258 | 1.141188 | 3.55E-05 |
| FLII     | 0.966419 | 0.889422 | 1.050081 | 0.420039 |
| SOX12    | 0.968782 | 0.898257 | 1.044844 | 0.410831 |
| HNRNPA0  | 0.920603 | 0.842796 | 1.005593 | 0.066333 |
| FAM87B   | 1.006668 | 0.920609 | 1.100772 | 0.884113 |
| CHID1    | 1.117047 | 1.01945  | 1.223988 | 0.017647 |
| ZNF620   | 1.084011 | 0.991373 | 1.185306 | 0.076749 |
| ZNF518A  | 1.034091 | 0.971077 | 1.101195 | 0.296004 |
| TMEM187  | 1.127339 | 1.027024 | 1.237452 | 0.01171  |
| ZNF619   | 1.030251 | 0.954021 | 1.112571 | 0.44734  |
| AP3S1    | 0.892294 | 0.814383 | 0.977658 | 0.014498 |
| GRB2     | 1.100371 | 1.002437 | 1.207872 | 0.044311 |
| ZBTB41   | 0.998008 | 0.91952  | 1.083194 | 0.961939 |
| UBE2N    | 1.023973 | 0.921565 | 1.137762 | 0.65947  |
| ARL6IP6  | 1.079402 | 0.972561 | 1.197979 | 0.150779 |
| ZNF354C  | 1.262081 | 1.161906 | 1.370892 | 3.46E-08 |
| MAMDC4   | 1.032125 | 0.974173 | 1.093525 | 0.283508 |
| CENPBD1  | 1.079469 | 0.989275 | 1.177885 | 0.085842 |
| ODF3     | 1.029398 | 0.957211 | 1.107029 | 0.43476  |
| BET1L    | 1.081738 | 0.977644 | 1.196914 | 0.128012 |
| RPS27    | 0.956441 | 0.907651 | 1.007854 | 0.095489 |
| RIC8A    | 1.048588 | 0.962834 | 1.141981 | 0.275755 |
| IMP3     | 1.293055 | 1.174568 | 1.423494 | 1.59E-07 |
| ASB8     | 1.10097  | 1.000859 | 1.211095 | 0.047972 |
| ODF3B    | 0.902695 | 0.852898 | 0.955399 | 0.000406 |
| DPY19L2  | 0.908663 | 0.866942 | 0.952392 | 6.50E-05 |
| GPR150   | 1.19768  | 1.11094  | 1.291192 | 2.57E-06 |
| TSPYL6   | 0.961329 | 0.84998  | 1.087265 | 0.530063 |
| DMAP1    | 1.141416 | 1.034643 | 1.259207 | 0.0083   |
| IMPDH2   | 0.988465 | 0.905822 | 1.078649 | 0.794529 |
| ALS2CL   | 0.933561 | 0.880118 | 0.99025  | 0.02227  |

|          |          |          |          |          |
|----------|----------|----------|----------|----------|
| MLF1     | 1.177894 | 1.099001 | 1.262451 | 3.68E-06 |
| NDUFAF3  | 1.12531  | 1.01974  | 1.241809 | 0.01883  |
| GRAMD1C  | 1.048127 | 0.911894 | 1.204713 | 0.508189 |
| STAP2    | 1.004958 | 0.911986 | 1.107408 | 0.920461 |
| TSSK6    | 1.013809 | 0.932995 | 1.101623 | 0.746255 |
| BOLA1    | 0.99053  | 0.917756 | 1.069074 | 0.806916 |
| PDE4DIP  | 1.235192 | 1.139069 | 1.339426 | 3.22E-07 |
| DDX10    | 1.034794 | 0.960901 | 1.114369 | 0.365553 |
| NDUFV2   | 0.952741 | 0.904438 | 1.003624 | 0.068197 |
| DALRD3   | 0.976846 | 0.892471 | 1.069197 | 0.611258 |
| ZNF114   | 1.225067 | 1.10015  | 1.364167 | 0.000216 |
| ZNF518B  | 1.11555  | 1.038985 | 1.197758 | 0.002577 |
| LCORL    | 0.977144 | 0.896067 | 1.065558 | 0.600861 |
| PARD6G   | 1.027822 | 0.928701 | 1.137522 | 0.595852 |
| SH2B1    | 1.060057 | 0.96957  | 1.15899  | 0.200145 |
| ZC3H12D  | 1.046011 | 0.973587 | 1.123822 | 0.219156 |
| VN1R1    | 1.094369 | 0.977517 | 1.225189 | 0.11752  |
| SH2D4B   | 0.976123 | 0.872627 | 1.091893 | 0.672581 |
| RNF212   | 1.134034 | 1.015011 | 1.267014 | 0.026194 |
| PRSS36   | 1.201097 | 1.098109 | 1.313744 | 6.17E-05 |
| ZNF543   | 1.038863 | 0.966002 | 1.117221 | 0.304113 |
| GALNT11  | 0.987602 | 0.91537  | 1.065534 | 0.7475   |
| WDR6     | 1.028795 | 0.962741 | 1.099382 | 0.401766 |
| GEN1     | 1.076787 | 0.986285 | 1.175593 | 0.098603 |
| TMPRSS9  | 1.066396 | 0.998649 | 1.138739 | 0.054907 |
| AQP11    | 1.061804 | 0.986908 | 1.142383 | 0.108086 |
| TMEM11   | 1.00421  | 0.899645 | 1.120927 | 0.94031  |
| ZNF354B  | 1.040037 | 0.957889 | 1.12923  | 0.349732 |
| KCNG2    | 0.838468 | 0.783934 | 0.896795 | 2.83E-07 |
| ZFAND2A  | 0.96161  | 0.88059  | 1.050084 | 0.383362 |
| PLEKHM3  | 1.006415 | 0.931423 | 1.087446 | 0.871415 |
| ZNF223   | 1.180064 | 1.015111 | 1.37182  | 0.031146 |
| BEND3    | 1.074845 | 0.979132 | 1.179914 | 0.129322 |
| NT5DC1   | 1.047024 | 0.949073 | 1.155084 | 0.359166 |
| GLDC     | 1.159608 | 1.031046 | 1.3042   | 0.013515 |
| TUBAL3   | 1.177737 | 1.103678 | 1.256766 | 7.94E-07 |
| P4HTM    | 1.143055 | 1.052355 | 1.241572 | 0.001526 |
| DTX3     | 1.223705 | 1.157903 | 1.293247 | 8.14E-13 |
| KLHL11   | 1.012889 | 0.94363  | 1.087233 | 0.723044 |
| CTXN1    | 0.860329 | 0.782902 | 0.945414 | 0.001769 |
| SLC25A20 | 1.153976 | 1.064848 | 1.250564 | 0.000479 |
| CA8      | 1.027197 | 0.94655  | 1.114715 | 0.520087 |
| CD28     | 0.974269 | 0.923711 | 1.027594 | 0.337669 |
| EPM2AIP1 | 1.011262 | 0.938619 | 1.089527 | 0.768411 |
| MAF      | 1.093966 | 1.01458  | 1.179563 | 0.019463 |
| CTNNBIP1 | 0.943319 | 0.869385 | 1.02354  | 0.161146 |
| GTPBP6   | 1.069805 | 0.971062 | 1.17859  | 0.172049 |
| ERN1     | 1.0281   | 0.947284 | 1.115811 | 0.507045 |
| GPR35    | 1.068414 | 1.002518 | 1.138642 | 0.041611 |
| ZNF713   | 0.967908 | 0.87595  | 1.06952  | 0.521906 |
| PARP10   | 1.117807 | 1.046699 | 1.193746 | 0.000897 |
| SUZ12    | 0.962737 | 0.88862  | 1.043036 | 0.352843 |
| NSUN3    | 1.098421 | 0.999442 | 1.207202 | 0.05137  |
| KCTD12   | 1.024783 | 0.986759 | 1.064273 | 0.20444  |
| RPP25    | 1.096541 | 1.021646 | 1.176927 | 0.010672 |
| GRINA    | 1.153602 | 1.057308 | 1.258666 | 0.001313 |
| THBD     | 1.089715 | 1.043525 | 1.13795  | 0.000101 |
| GP5      | 1.154131 | 1.077874 | 1.235784 | 3.95E-05 |

|          |          |          |          |          |
|----------|----------|----------|----------|----------|
| COX5A    | 0.984587 | 0.901028 | 1.075896 | 0.731393 |
| STX19    | 1.166108 | 1.017674 | 1.336191 | 0.026955 |
| ZHX2     | 1.03347  | 0.975845 | 1.094498 | 0.260728 |
| CPNE7    | 0.919697 | 0.877123 | 0.964338 | 0.000537 |
| CD300LB  | 1.078162 | 1.032837 | 1.125477 | 0.000594 |
| MPI      | 1.092893 | 0.991141 | 1.20509  | 0.074829 |
| TRIM73   | 0.929991 | 0.829671 | 1.042441 | 0.212671 |
| OPLAH    | 1.204832 | 1.135339 | 1.27858  | 7.87E-10 |
| TMEM52   | 0.894971 | 0.798467 | 1.003138 | 0.056632 |
| MSC      | 1.143565 | 1.055801 | 1.238624 | 0.000992 |
| APOLD1   | 1.123513 | 1.024835 | 1.231693 | 0.013029 |
| EXOSC4   | 1.351765 | 1.241574 | 1.471736 | 3.72E-12 |
| DPY19L3  | 0.97844  | 0.908041 | 1.054298 | 0.567262 |
| TAF7     | 0.973882 | 0.88784  | 1.068262 | 0.57495  |
| PFAS     | 1.024572 | 0.96013  | 1.093339 | 0.46392  |
| ZNF552   | 0.984923 | 0.922762 | 1.05127  | 0.647851 |
| GAK      | 0.957925 | 0.891112 | 1.029749 | 0.243906 |
| ZBTB7A   | 0.930823 | 0.85231  | 1.016568 | 0.110829 |
| TUFM     | 1.051028 | 0.949776 | 1.163074 | 0.335571 |
| RMI1     | 1.116079 | 1.039081 | 1.198783 | 0.002603 |
| FBXO34   | 1.048999 | 0.973775 | 1.130035 | 0.20767  |
| EIF3K    | 0.969547 | 0.869845 | 1.080677 | 0.576443 |
| MRFAP1L1 | 1.202019 | 1.09758  | 1.316396 | 7.26E-05 |
| SNX18    | 0.979375 | 0.924208 | 1.037834 | 0.481092 |
| AURKB    | 1.128355 | 1.055754 | 1.205949 | 0.000372 |
| MRFAP1   | 1.026999 | 0.91466  | 1.153136 | 0.652178 |
| TMEM107  | 1.023598 | 0.972324 | 1.077576 | 0.373713 |
| RRS1     | 1.164319 | 1.068124 | 1.269177 | 0.000544 |
| RCC2     | 0.9565   | 0.892945 | 1.024579 | 0.204873 |
| OR13D1   | 0.937889 | 0.837845 | 1.049878 | 0.265188 |
| IGSF22   | 1.175967 | 1.018698 | 1.357515 | 0.026906 |
| DPM3     | 1.083085 | 0.996179 | 1.177572 | 0.061448 |
| CYC1     | 1.162953 | 1.038708 | 1.30206  | 0.008825 |
| PER1     | 0.921952 | 0.867441 | 0.979889 | 0.008968 |
| HTR1F    | 1.140836 | 1.09456  | 1.189067 | 4.47E-10 |
| TMTC2    | 0.943049 | 0.899636 | 0.988557 | 0.014745 |
| FARSA    | 0.993894 | 0.925733 | 1.067073 | 0.865817 |
| SPTY2D1  | 0.884981 | 0.828762 | 0.945015 | 0.000263 |
| SAMD4B   | 0.87721  | 0.807325 | 0.953145 | 0.001982 |
| GIMAP7   | 1.042268 | 0.987594 | 1.099969 | 0.132095 |
| EDC3     | 1.044692 | 0.96537  | 1.130533 | 0.277833 |
| FUCA1    | 1.150732 | 1.077232 | 1.229247 | 3.06E-05 |
| PXT1     | 1.005134 | 0.890106 | 1.135026 | 0.934186 |
| GGN      | 0.970982 | 0.899634 | 1.047988 | 0.449505 |
| ZNF664   | 1.154715 | 1.076592 | 1.238507 | 5.70E-05 |
| CALR     | 0.831455 | 0.781769 | 0.884299 | 4.33E-09 |
| MAGED1   | 1.028288 | 0.971817 | 1.08804  | 0.333061 |
| LDLRAD3  | 1.168789 | 1.119487 | 1.220263 | 1.31E-12 |
| CDH4     | 1.019966 | 0.946567 | 1.099056 | 0.603889 |
| RAD23A   | 1.023493 | 0.909899 | 1.151268 | 0.69885  |
| GADD45G  | 0.997738 | 0.932439 | 1.067611 | 0.947723 |
| MEIS3P1  | 1.008914 | 0.942175 | 1.08038  | 0.799384 |
| DAND5    | 0.976201 | 0.846911 | 1.125228 | 0.739671 |
| TMEM151  | 1.011093 | 0.916704 | 1.115202 | 0.825377 |
| PTPN11   | 0.99206  | 0.912736 | 1.078279 | 0.851286 |
| NSUN7    | 1.249258 | 1.129776 | 1.381376 | 1.43E-05 |
| WSCD1    | 1.143136 | 1.026287 | 1.273289 | 0.015032 |
| CLK3     | 0.977486 | 0.900597 | 1.060939 | 0.585908 |



|          |          |          |          |          |
|----------|----------|----------|----------|----------|
| HLA-DQB1 | 0.96517  | 0.92914  | 1.002598 | 0.067803 |
| GATA2    | 0.981772 | 0.945383 | 1.019561 | 0.33974  |
| ARID3B   | 1.071065 | 1.00157  | 1.145381 | 0.044877 |
| PACS2    | 1.117382 | 1.021882 | 1.221807 | 0.014899 |
| ELMOD2   | 1.110355 | 1.018756 | 1.210191 | 0.017174 |
| EGR3     | 1.09564  | 1.042622 | 1.151355 | 0.000307 |
| GPC5     | 1.251482 | 1.150652 | 1.361147 | 1.66E-07 |
| VWA1     | 0.970544 | 0.897648 | 1.049359 | 0.452929 |
| GEMIN4   | 1.026865 | 0.946523 | 1.114026 | 0.523625 |
| FJX1     | 1.292667 | 1.185386 | 1.409657 | 6.35E-09 |
| KLHL28   | 0.955403 | 0.876939 | 1.040888 | 0.29675  |
| MKRN3    | 1.055604 | 0.996435 | 1.118286 | 0.06597  |
| SHARPIN  | 1.232991 | 1.079583 | 1.408198 | 0.002005 |
| LBX2     | 1.069186 | 0.98413  | 1.161594 | 0.113713 |
| DNHD1    | 0.986228 | 0.925497 | 1.050945 | 0.668908 |
| SLITRK4  | 1.131857 | 1.077827 | 1.188594 | 6.93E-07 |
| GCC1     | 0.928607 | 0.861347 | 1.001119 | 0.053505 |
| RNF151   | 0.980093 | 0.903465 | 1.063219 | 0.628307 |
| CIITA    | 0.957196 | 0.915339 | 1.000968 | 0.055169 |
| ZFPM1    | 1.053891 | 0.990832 | 1.120964 | 0.095435 |
| ALOX15B  | 1.019846 | 0.9314   | 1.116691 | 0.671144 |
| PLD6     | 1.125897 | 1.033249 | 1.226853 | 0.006799 |
| CDC42EP4 | 0.98162  | 0.927372 | 1.039041 | 0.522445 |
| ZBTB42   | 0.973071 | 0.907888 | 1.042935 | 0.440327 |
| MAF1     | 0.917686 | 0.833687 | 1.010148 | 0.079462 |
| FCER1A   | 0.99874  | 0.965164 | 1.033485 | 0.942402 |
| FLJ37453 | 1.026746 | 0.928806 | 1.135014 | 0.605831 |
| APOBEC3E | 1.114164 | 1.043812 | 1.189259 | 0.00116  |
| PIPOX    | 1.026953 | 0.948313 | 1.112115 | 0.5129   |
| CDH5     | 1.236627 | 1.102034 | 1.387658 | 0.000303 |
| MYADM    | 1.016915 | 0.94848  | 1.090287 | 0.637011 |
| SERTAD2  | 0.944331 | 0.870414 | 1.024526 | 0.168411 |
| AKAP5    | 1.000575 | 0.916137 | 1.092796 | 0.989799 |
| NKPD1    | 0.992118 | 0.916036 | 1.07452  | 0.845879 |
| GIPC3    | 0.903242 | 0.845972 | 0.96439  | 0.002328 |
| CITED4   | 0.902747 | 0.855005 | 0.953154 | 0.000224 |
| ABCA13   | 1.026044 | 0.985994 | 1.06772  | 0.205648 |
| TIGD5    | 1.064407 | 0.980937 | 1.15498  | 0.134126 |
| PDXDC1   | 1.014528 | 0.939791 | 1.095208 | 0.711813 |
| ZNF154   | 1.020612 | 0.964409 | 1.08009  | 0.480208 |
| R3HDM2   | 1.118762 | 1.002527 | 1.248474 | 0.044958 |
| B3GNT3   | 1.184691 | 1.039446 | 1.350231 | 0.011094 |
| ITLN1    | 1.077608 | 1.021785 | 1.136481 | 0.005886 |
| SEPHS2   | 1.084541 | 0.996162 | 1.180761 | 0.061303 |
| GPBAR1   | 0.921767 | 0.858861 | 0.989281 | 0.023897 |
| ZNF784   | 0.973435 | 0.891795 | 1.062549 | 0.546882 |
| BBS10    | 1.088282 | 1.010283 | 1.172302 | 0.025775 |
| FIZ1     | 0.964427 | 0.865987 | 1.074056 | 0.509646 |
| PUF60    | 1.082816 | 0.986148 | 1.18896  | 0.095392 |
| DCTPP1   | 1.118368 | 1.037915 | 1.205056 | 0.003314 |
| ZNF771   | 1.256299 | 1.089607 | 1.448493 | 0.001681 |
| TSHZ1    | 1.050299 | 0.971793 | 1.135147 | 0.215681 |
| PSTK     | 1.011257 | 0.917039 | 1.115155 | 0.822498 |
| SOCS4    | 1.036583 | 0.95737  | 1.12235  | 0.375693 |
| ZADH2    | 1.043103 | 0.955288 | 1.13899  | 0.346962 |
| ZNF48    | 1.119025 | 1.032666 | 1.212606 | 0.006062 |
| TMEM150I | 1.126334 | 1.069367 | 1.186337 | 7.04E-06 |
| ANKRD18A | 0.998676 | 0.955223 | 1.044105 | 0.953445 |

|          |          |          |          |          |
|----------|----------|----------|----------|----------|
| TMEM86B  | 1.156672 | 1.052331 | 1.271359 | 0.002549 |
| TRNAU1AI | 1.014689 | 0.917125 | 1.122632 | 0.777391 |
| EXOC3    | 1.128514 | 1.022542 | 1.24547  | 0.01626  |
| CSNK1A1L | 1.062809 | 0.962462 | 1.173619 | 0.228651 |
| LYNX1    | 1.476735 | 1.342063 | 1.624921 | 1.35E-15 |
| MED14    | 0.979964 | 0.904567 | 1.061646 | 0.620257 |
| FAHD1    | 1.251024 | 1.141463 | 1.371101 | 1.67E-06 |
| RCC1     | 0.935063 | 0.867726 | 1.007625 | 0.078279 |
| MYLPF    | 1.073297 | 0.969817 | 1.18782  | 0.171479 |
| F2       | 0.959262 | 0.844804 | 1.089228 | 0.521158 |
| PRKRA    | 0.956737 | 0.875885 | 1.045052 | 0.326214 |
| ZNRF2    | 0.97329  | 0.909304 | 1.04178  | 0.435225 |
| FGD6     | 0.972954 | 0.910124 | 1.04012  | 0.420804 |
| OAZ2     | 0.894613 | 0.821652 | 0.974052 | 0.010298 |
| PNPLA1   | 1.062242 | 0.986383 | 1.143935 | 0.110203 |
| CCDC43   | 1.102272 | 0.994976 | 1.221137 | 0.062381 |
| KCTD4    | 0.986794 | 0.931829 | 1.045001 | 0.649374 |
| FZD2     | 1.135761 | 1.075174 | 1.199761 | 5.33E-06 |
| TIGD2    | 1.073293 | 0.991173 | 1.162217 | 0.081571 |
| HCLS1    | 1.068318 | 0.987351 | 1.155926 | 0.100301 |
| ZNF609   | 0.92613  | 0.873837 | 0.981552 | 0.009657 |
| PAK2     | 1.000079 | 0.926114 | 1.07995  | 0.998396 |
| CCDC66   | 1.054928 | 0.97073  | 1.14643  | 0.207675 |
| MCFD2    | 1.005826 | 0.924408 | 1.094414 | 0.892708 |
| HARBI1   | 1.071221 | 0.975924 | 1.175823 | 0.147817 |
| GAS1     | 1.288201 | 1.208086 | 1.373628 | 1.07E-14 |
| ZNF571   | 0.960524 | 0.885723 | 1.041643 | 0.330229 |
| KCNE1    | 1.085965 | 1.026471 | 1.148908 | 0.00412  |
| NRIP1    | 1.060542 | 1.008657 | 1.115097 | 0.021632 |
| BHLHA15  | 0.977864 | 0.867468 | 1.102309 | 0.714179 |
| RNF182   | 1.067484 | 1.018696 | 1.118609 | 0.006219 |
| TSPYL5   | 1.174667 | 1.11821  | 1.233976 | 1.50E-10 |
| FUT7     | 1.138969 | 1.084232 | 1.19647  | 2.24E-07 |
| SSTR2    | 0.961668 | 0.86274  | 1.071939 | 0.480377 |
| ZNF594   | 1.073069 | 0.9953   | 1.156916 | 0.066175 |
| PCGF5    | 1.087304 | 0.994455 | 1.188822 | 0.066081 |
| PRF1     | 0.991089 | 0.946384 | 1.037907 | 0.703885 |
| YOD1     | 0.98742  | 0.93239  | 1.045697 | 0.665227 |
| TMEM64   | 0.964325 | 0.906647 | 1.025671 | 0.248313 |
| CHRM4    | 0.959834 | 0.884689 | 1.041362 | 0.324345 |
| SHISA2   | 1.058277 | 0.969156 | 1.155593 | 0.206965 |
| S1PR5    | 1.048116 | 0.975437 | 1.12621  | 0.199955 |
| GPR157   | 1.331348 | 1.224556 | 1.447453 | 1.97E-11 |
| PIPSL    | 1.134956 | 0.967047 | 1.332018 | 0.1212   |
| CHST13   | 0.987956 | 0.943701 | 1.034286 | 0.604297 |
| SLC36A4  | 0.985415 | 0.926232 | 1.048378 | 0.641971 |
| ZDHHC20  | 0.89731  | 0.833448 | 0.966065 | 0.004022 |
| ZFP3     | 1.210986 | 1.121254 | 1.307899 | 1.10E-06 |
| MAP3K15  | 0.919968 | 0.833028 | 1.015981 | 0.099572 |
| PPA1     | 1.157789 | 1.069177 | 1.253746 | 0.00031  |
| PSMG4    | 1.234991 | 1.121293 | 1.360216 | 1.84E-05 |
| MAP6D1   | 1.002411 | 0.855754 | 1.174202 | 0.976195 |
| ZNF443   | 1.016112 | 0.949343 | 1.087577 | 0.644871 |
| SSR4     | 1.033781 | 0.93705  | 1.140497 | 0.507449 |
| CAPS2    | 1.081636 | 0.972533 | 1.202979 | 0.148018 |
| ZNF792   | 0.996114 | 0.942771 | 1.052475 | 0.889715 |
| CUEDC1   | 1.173181 | 1.095321 | 1.256576 | 5.15E-06 |
| SCRIB    | 1.036067 | 0.969239 | 1.107503 | 0.297633 |

|          |          |          |          |          |
|----------|----------|----------|----------|----------|
| KCTD2    | 0.966228 | 0.885946 | 1.053785 | 0.4376   |
| D2HGDH   | 1.075251 | 1.001483 | 1.154453 | 0.04541  |
| OXTR     | 1.375407 | 1.188831 | 1.591265 | 1.82E-05 |
| FAM83H   | 1.121092 | 1.054089 | 1.192353 | 0.000278 |
| ZNF572   | 1.154632 | 1.038083 | 1.284266 | 0.008087 |
| ST20     | 1.029676 | 0.954168 | 1.111159 | 0.451695 |
| PITPNB   | 0.953937 | 0.879018 | 1.035241 | 0.258463 |
| TCEAL8   | 1.082343 | 0.99729  | 1.174649 | 0.058096 |
| LRRC57   | 0.928495 | 0.853342 | 1.010268 | 0.084933 |
| MRPL14   | 1.126169 | 1.024876 | 1.237474 | 0.013476 |
| GPR137C  | 1.107563 | 0.976754 | 1.25589  | 0.111121 |
| BBS12    | 1.303629 | 1.164994 | 1.458761 | 3.80E-06 |
| ZFP82    | 1.09495  | 0.988414 | 1.212969 | 0.082417 |
| NQO1     | 1.071909 | 0.973631 | 1.180108 | 0.156978 |
| OR56B1   | 0.894466 | 0.787079 | 1.016506 | 0.087435 |
| AEN      | 1.059381 | 0.987372 | 1.136642 | 0.108245 |
| FKRP     | 1.10531  | 1.000855 | 1.220666 | 0.048061 |
| TRAPPC5  | 1.086223 | 0.981761 | 1.2018   | 0.108898 |
| RPH3AL   | 0.964196 | 0.879114 | 1.057513 | 0.439193 |
| SLC25A42 | 1.017483 | 0.946456 | 1.09384  | 0.638756 |
| FCRL6    | 1.108874 | 1.014953 | 1.211486 | 0.022099 |
| SLC26A11 | 1.012726 | 0.959156 | 1.069287 | 0.648362 |
| HIGD1A   | 1.31922  | 1.217607 | 1.429312 | 1.25E-11 |
| OR52N4   | 0.95474  | 0.873115 | 1.043995 | 0.30975  |
| MAPK15   | 0.999415 | 0.90357  | 1.105427 | 0.990927 |
| EHMT1    | 0.973847 | 0.898438 | 1.055586 | 0.519286 |
| F2R      | 1.068124 | 1.016523 | 1.122344 | 0.00909  |
| ZNF707   | 1.177861 | 1.072299 | 1.293815 | 0.000633 |
| NPM1     | 0.868908 | 0.799217 | 0.944675 | 0.000987 |
| PJA1     | 1.079275 | 0.987422 | 1.179673 | 0.092751 |
| DHTKD1   | 0.98824  | 0.928154 | 1.052216 | 0.711663 |
| PENK     | 1.081959 | 1.017366 | 1.150654 | 0.012136 |
| ZNF746   | 0.939803 | 0.865647 | 1.020313 | 0.138754 |
| POLR2A   | 0.94048  | 0.867826 | 1.019217 | 0.13467  |
| FRAT2    | 1.005492 | 0.939956 | 1.075598 | 0.873451 |
| TMEM102  | 0.916597 | 0.844536 | 0.994807 | 0.037106 |
| CCL13    | 1.268367 | 1.067834 | 1.50656  | 0.006781 |
| DDX60L   | 1.092236 | 1.029085 | 1.159261 | 0.00369  |
| AATK     | 1.072085 | 0.999871 | 1.149515 | 0.050425 |
| DDN      | 1.018623 | 0.899722 | 1.153237 | 0.770772 |
| SAGE1    | 1.060824 | 1.021116 | 1.102076 | 0.002417 |
| ZNF467   | 0.932128 | 0.881108 | 0.986102 | 0.014395 |
| ZNF678   | 1.071536 | 0.99337  | 1.155853 | 0.073804 |
| TMEM45A  | 1.145765 | 1.02219  | 1.284279 | 0.019445 |
| RAP2B    | 1.02362  | 0.947669 | 1.105658 | 0.552842 |
| ZBTB2    | 0.97809  | 0.897979 | 1.065347 | 0.611369 |
| RNF135   | 0.951957 | 0.883109 | 1.026173 | 0.19864  |
| ACBD4    | 1.202974 | 1.101434 | 1.313875 | 4.00E-05 |
| SGSH     | 0.994747 | 0.946116 | 1.045878 | 0.836838 |
| MAB21L2  | 1.052267 | 0.973976 | 1.136851 | 0.196525 |
| FANCB    | 1.045252 | 0.965882 | 1.131143 | 0.27202  |
| SETD2    | 0.943308 | 0.882167 | 1.008688 | 0.08783  |
| TMIE     | 0.846877 | 0.742416 | 0.966036 | 0.013346 |
| MEX3D    | 1.171796 | 1.087499 | 1.262627 | 3.15E-05 |
| MRPS23   | 1.263918 | 1.129377 | 1.414486 | 4.53E-05 |
| OR52H1   | 1.006514 | 0.923437 | 1.097064 | 0.882568 |
| GPR135   | 1.089525 | 1.014597 | 1.169986 | 0.018344 |
| P2RY13   | 1.030561 | 0.988138 | 1.074806 | 0.160443 |

|         |          |          |          |          |
|---------|----------|----------|----------|----------|
| ZFP41   | 1.15102  | 1.045389 | 1.267325 | 0.004186 |
| PHLDA2  | 1.015743 | 0.966608 | 1.067376 | 0.536934 |
| ATG9B   | 1.211709 | 1.041154 | 1.410204 | 0.013101 |
| GPR88   | 1.15295  | 1.0806   | 1.230145 | 1.68E-05 |
| PLAG1   | 1.175575 | 1.101919 | 1.254155 | 9.59E-07 |
| YIPF6   | 1.037676 | 0.948597 | 1.13512  | 0.419316 |
| ZBTB20  | 1.01445  | 0.942388 | 1.092021 | 0.702753 |
| AMIGO1  | 0.988883 | 0.909113 | 1.075654 | 0.794478 |
| GPR3    | 0.965163 | 0.89073  | 1.045816 | 0.38652  |
| SIAH2   | 0.989596 | 0.914385 | 1.070994 | 0.795388 |
| SLC9A9  | 1.175493 | 1.117395 | 1.236612 | 4.05E-10 |
| LSM10   | 1.157088 | 1.028356 | 1.301935 | 0.015324 |
| RELL1   | 0.956276 | 0.896108 | 1.020483 | 0.177519 |
| RFX7    | 0.939742 | 0.879189 | 1.004465 | 0.067418 |
| SLC35C1 | 1.0895   | 1.004759 | 1.181387 | 0.037997 |
| TIGIT   | 1.05197  | 0.952453 | 1.161886 | 0.317692 |
| RNF41   | 0.98263  | 0.885913 | 1.089906 | 0.740299 |
| SLC2A4  | 1.053827 | 0.993678 | 1.117617 | 0.080383 |
| CLDN7   | 1.063753 | 0.953925 | 1.186226 | 0.266321 |
| ZNF329  | 0.997729 | 0.929352 | 1.071136 | 0.949941 |
| ZNF101  | 1.074271 | 0.997261 | 1.157228 | 0.059067 |
| ADO     | 1.10118  | 1.004067 | 1.207685 | 0.040743 |
| PRKAG1  | 1.11878  | 0.991079 | 1.262937 | 0.069517 |
| GINS3   | 1.276492 | 1.16703  | 1.396221 | 9.46E-08 |
| OR52K2  | 1.00702  | 0.936552 | 1.08279  | 0.850095 |
| CCDC149 | 1.013298 | 0.938633 | 1.093903 | 0.735152 |
| MRPS11  | 1.29002  | 1.141811 | 1.457466 | 4.32E-05 |
| SNRPE   | 1.047931 | 0.971796 | 1.13003  | 0.223776 |
| RTKN2   | 1.251696 | 1.123603 | 1.394393 | 4.59E-05 |
| CHST15  | 0.996898 | 0.952702 | 1.043145 | 0.893186 |
| TRPC2   | 1.033707 | 0.970573 | 1.100947 | 0.302531 |
| IDH2    | 1.003597 | 0.915783 | 1.099831 | 0.938737 |
| TNRC18  | 0.945875 | 0.891433 | 1.003641 | 0.065797 |
| TMEM30B | 1.348421 | 1.174879 | 1.547596 | 2.11E-05 |
| DEXI    | 0.958423 | 0.895614 | 1.025637 | 0.219461 |
| NOP10   | 1.011729 | 0.93111  | 1.099328 | 0.783146 |
| FAM89A  | 0.899022 | 0.838207 | 0.964249 | 0.002895 |
| TDRKH   | 1.417212 | 1.299213 | 1.545928 | 3.80E-15 |
| ZNF708  | 0.98578  | 0.914307 | 1.062841 | 0.709191 |
| MRPL41  | 1.11391  | 1.013955 | 1.22372  | 0.024521 |
| CREB3L2 | 0.895976 | 0.828442 | 0.969015 | 0.006011 |
| P2RY8   | 0.984519 | 0.932268 | 1.039698 | 0.574952 |
| TP53TG1 | 1.637589 | 1.346645 | 1.991392 | 7.73E-07 |
| UNC5C   | 1.109529 | 1.064098 | 1.1569   | 1.10E-06 |
| TSEN54  | 1.074366 | 1.000868 | 1.153261 | 0.047261 |
| RGMA    | 0.900938 | 0.813877 | 0.997312 | 0.044234 |
| UBA7    | 1.025586 | 0.959783 | 1.0959   | 0.455229 |
| MRPS16  | 1.190039 | 1.071802 | 1.321319 | 0.001119 |
| LDOC1   | 1.207568 | 1.072476 | 1.359676 | 0.001834 |
| ARL6IP4 | 1.153753 | 1.007671 | 1.321013 | 0.038396 |
| EXT1    | 1.085453 | 1.017319 | 1.158151 | 0.013171 |
| SHMT2   | 0.982974 | 0.898008 | 1.075979 | 0.709668 |
| ATP6AP2 | 1.114709 | 1.003177 | 1.23864  | 0.043494 |
| ZAR1    | 1.036414 | 0.938272 | 1.144821 | 0.481023 |
| BACE2   | 1.110581 | 1.038462 | 1.187708 | 0.002201 |
| UBE2E2  | 0.856691 | 0.80771  | 0.908642 | 2.61E-07 |
| SYNM    | 1.19538  | 1.057017 | 1.351854 | 0.004463 |
| IZUMO1  | 1.20463  | 1.057217 | 1.372597 | 0.005183 |

|          |          |          |          |          |
|----------|----------|----------|----------|----------|
| B4GALNT4 | 1.070735 | 0.992562 | 1.155065 | 0.077236 |
| AP1S2    | 1.055801 | 0.982639 | 1.134409 | 0.138345 |
| DCAF4L1  | 1.026653 | 0.940764 | 1.120383 | 0.555126 |
| ZSCAN22  | 1.048275 | 0.960225 | 1.144399 | 0.292229 |
| KCNJ14   | 1.090232 | 0.999066 | 1.189718 | 0.052503 |
| FBXL6    | 1.122843 | 1.026862 | 1.227794 | 0.011041 |
| C1S      | 1.192218 | 1.070984 | 1.327176 | 0.001312 |
| GLTPD2   | 1.025903 | 0.949441 | 1.108524 | 0.517551 |
| KBTBD3   | 1.065518 | 0.919699 | 1.234457 | 0.398021 |
| CLN8     | 0.940142 | 0.886956 | 0.996517 | 0.037767 |
| PLCXD1   | 1.008574 | 0.936826 | 1.085817 | 0.820613 |
| NXPH4    | 1.148005 | 0.982306 | 1.341654 | 0.082653 |
| CACNB4   | 0.81026  | 0.732229 | 0.896606 | 4.65E-05 |
| TRAPPC6B | 1.04012  | 0.94836  | 1.140758 | 0.403847 |
| PGBD4    | 1.115966 | 1.019719 | 1.221296 | 0.017111 |
| NPLOC4   | 1.019005 | 0.934455 | 1.111204 | 0.670109 |
| CAPN12   | 1.070019 | 0.963005 | 1.188924 | 0.208102 |
| EXOC7    | 1.076909 | 0.970629 | 1.194827 | 0.162221 |
| KPNA2    | 0.953573 | 0.878653 | 1.034882 | 0.25483  |
| NCF1B    | 1.056441 | 1.009292 | 1.105793 | 0.018424 |
| BGN      | 1.078731 | 0.983358 | 1.183353 | 0.108575 |
| CEP97    | 1.072321 | 0.989449 | 1.162134 | 0.088853 |
| FES      | 1.043438 | 0.979569 | 1.111471 | 0.187023 |
| GLRX5    | 1.050233 | 0.975453 | 1.130746 | 0.193428 |
| FAM104B  | 1.199679 | 1.08219  | 1.329924 | 0.000536 |
| MXRA7    | 1.017791 | 0.958073 | 1.08123  | 0.567586 |
| LIMK2    | 1.033736 | 0.974615 | 1.096443 | 0.269497 |
| MFSD5    | 1.125254 | 1.037614 | 1.220297 | 0.004338 |
| ADI1     | 1.124107 | 1.019776 | 1.239111 | 0.018572 |
| SPNS3    | 1.054475 | 1.013558 | 1.097045 | 0.008617 |
| SATB1    | 0.990125 | 0.923735 | 1.061287 | 0.779296 |
| CSF1R    | 1.025948 | 0.984606 | 1.069026 | 0.222203 |
| EPHB3    | 1.148253 | 1.085746 | 1.214359 | 1.29E-06 |
| EPGN     | 1.049977 | 1.012367 | 1.088984 | 0.008783 |
| HS3ST4   | 1.024383 | 0.962702 | 1.090017 | 0.447069 |
| TRAK1    | 0.909608 | 0.838567 | 0.986667 | 0.022402 |
| PLCB1    | 0.935571 | 0.887112 | 0.986678 | 0.01412  |
| SKA2     | 1.309134 | 1.210692 | 1.41558  | 1.44E-11 |
| NDN      | 1.060266 | 1.012905 | 1.109842 | 0.012076 |
| TTC3     | 0.944252 | 0.884532 | 1.008003 | 0.085283 |
| GALR2    | 0.97481  | 0.892112 | 1.065175 | 0.572724 |
| TSKU     | 1.09422  | 0.96183  | 1.244833 | 0.17116  |
| ANXA2    | 0.980876 | 0.934363 | 1.029705 | 0.435978 |
| RGS6     | 1.158478 | 1.061774 | 1.26399  | 0.00094  |
| HOXB4    | 1.055341 | 1.023449 | 1.088227 | 0.000581 |
| PAQR7    | 0.890381 | 0.833689 | 0.950929 | 0.000542 |
| PAPPA    | 1.099855 | 1.024195 | 1.181105 | 0.00886  |
| MAFA     | 0.972032 | 0.90706  | 1.041659 | 0.4216   |
| NGRN     | 1.209895 | 1.092744 | 1.339605 | 0.000246 |
| RPS17    | 1.119685 | 1.019743 | 1.229422 | 0.017798 |
| CRIP2    | 0.88823  | 0.838296 | 0.941138 | 5.94E-05 |
| DDX28    | 1.106777 | 1.003635 | 1.220518 | 0.042086 |
| ACBD3    | 0.929989 | 0.846457 | 1.021766 | 0.130649 |
| VMO1     | 1.058424 | 0.95853  | 1.16873  | 0.26161  |
| ALG12    | 1.038337 | 0.944013 | 1.142085 | 0.438795 |
| LCK      | 1.022133 | 0.969297 | 1.077848 | 0.418863 |
| COL18A1  | 1.162232 | 1.097402 | 1.230892 | 2.84E-07 |
| RBM10    | 0.996602 | 0.906304 | 1.095898 | 0.944005 |

|          |          |          |          |          |
|----------|----------|----------|----------|----------|
| GLUD2    | 0.864199 | 0.745312 | 1.002049 | 0.053254 |
| RPL35A   | 0.929126 | 0.85825  | 1.005855 | 0.069405 |
| SLC25A18 | 0.9863   | 0.862126 | 1.12836  | 0.840758 |
| ZNF721   | 0.871005 | 0.81372  | 0.932321 | 6.92E-05 |
| CEP63    | 1.009292 | 0.904943 | 1.125674 | 0.868068 |
| WFDC10B  | 0.791407 | 0.65403  | 0.957641 | 0.016177 |
| EWSR1    | 0.933152 | 0.857055 | 1.016007 | 0.110917 |
| ODF3L1   | 1.118647 | 1.04896  | 1.192963 | 0.000634 |
| HMGN4    | 1.092015 | 1.003062 | 1.188856 | 0.042306 |
| SPATA13  | 1.03464  | 0.961706 | 1.113105 | 0.361213 |
| CNOT10   | 1.023735 | 0.923805 | 1.134475 | 0.654427 |
| MTA1     | 0.946792 | 0.871732 | 1.028316 | 0.194493 |
| ZNF662   | 1.011937 | 0.948926 | 1.079134 | 0.717527 |
| CADM1    | 1.046794 | 0.999253 | 1.096596 | 0.053799 |
| ZNF320   | 1.03947  | 0.958179 | 1.127658 | 0.351478 |
| PYCR1    | 1.071234 | 1.007296 | 1.13923  | 0.028418 |
| SPNS2    | 0.986437 | 0.945075 | 1.02961  | 0.53209  |
| AP2A2    | 0.902983 | 0.834094 | 0.977562 | 0.01172  |
| SLC8A1   | 1.171341 | 1.105937 | 1.240612 | 6.86E-08 |
| SLC25A21 | 1.144697 | 1.022113 | 1.281982 | 0.019365 |
| ABAT     | 1.087478 | 0.997997 | 1.184982 | 0.055595 |
| SLC25A10 | 1.200314 | 1.090146 | 1.321616 | 0.000201 |
| CAMK1D   | 1.010961 | 0.953184 | 1.07224  | 0.716559 |
| LYSMD4   | 1.050984 | 0.969703 | 1.139078 | 0.225957 |
| AFMID    | 1.01683  | 0.942    | 1.097604 | 0.668692 |
| GAS6     | 1.111708 | 1.042254 | 1.18579  | 0.001294 |
| NEB      | 0.991105 | 0.887213 | 1.107164 | 0.874353 |
| BEGAIN   | 1.138813 | 1.035581 | 1.252335 | 0.007338 |
| GPC6     | 1.016373 | 0.930174 | 1.110561 | 0.719473 |
| CSMD1    | 1.127477 | 1.036734 | 1.226162 | 0.005068 |
| GPR19    | 1.169505 | 0.990083 | 1.381441 | 0.065376 |
| RABIF    | 1.137661 | 1.035229 | 1.250228 | 0.00738  |
| TMEM119  | 1.105688 | 1.000099 | 1.222426 | 0.049774 |
| FANCF    | 1.104087 | 1.020388 | 1.194652 | 0.013826 |
| CALN1    | 1.074029 | 1.013615 | 1.138044 | 0.015615 |
| RUVBL2   | 1.079399 | 0.994099 | 1.172019 | 0.068904 |
| PTTG1IP  | 1.000451 | 0.924596 | 1.082529 | 0.991055 |
| DDX41    | 1.038026 | 0.940869 | 1.145217 | 0.456671 |
| DAZAP2   | 1.008626 | 0.912631 | 1.114718 | 0.866333 |
| ZNF623   | 1.078837 | 1.007862 | 1.15481  | 0.028852 |
| CCDC125  | 0.967404 | 0.903205 | 1.036167 | 0.34421  |
| BCOR     | 1.151191 | 1.068195 | 1.240636 | 0.000226 |
| JRKL     | 1.026633 | 0.944618 | 1.11577  | 0.536077 |
| KIAA2026 | 0.980793 | 0.901515 | 1.067043 | 0.651999 |
| FHL3     | 0.848389 | 0.800537 | 0.899102 | 2.85E-08 |
| TMEM89   | 1.075934 | 0.964903 | 1.199742 | 0.187825 |
| SF3A3    | 0.980058 | 0.900467 | 1.066684 | 0.641118 |
| ASB7     | 0.959234 | 0.88332  | 1.041673 | 0.322471 |
| TREX2    | 1.312083 | 1.148775 | 1.498605 | 6.20E-05 |
| GPR132   | 1.067438 | 1.008326 | 1.130015 | 0.024755 |
| MX2      | 1.124744 | 1.058773 | 1.194827 | 0.000138 |
| EP400    | 0.970142 | 0.901527 | 1.043978 | 0.417957 |
| MEX3B    | 1.097867 | 1.050797 | 1.147045 | 2.96E-05 |
| PI4KAP2  | 1.032286 | 0.94433  | 1.128436 | 0.484341 |
| PSMG1    | 1.041153 | 0.940265 | 1.152867 | 0.438029 |
| KLRC4    | 0.998116 | 0.92313  | 1.079194 | 0.962258 |
| SERHL2   | 1.036804 | 0.960246 | 1.119464 | 0.35576  |
| PCBP3    | 1.08306  | 1.023669 | 1.145896 | 0.005555 |

|          |          |          |          |          |
|----------|----------|----------|----------|----------|
| SETD3    | 0.959691 | 0.882627 | 1.043485 | 0.33538  |
| TNFAIP8L | 0.94943  | 0.838748 | 1.074718 | 0.411899 |
| ZNRF3    | 1.186449 | 1.075665 | 1.308644 | 0.00063  |
| SFXN4    | 1.023707 | 0.943353 | 1.110904 | 0.574268 |
| FAM167B  | 1.029886 | 0.919504 | 1.153518 | 0.61068  |
| MRPL54   | 1.00104  | 0.916879 | 1.092927 | 0.981483 |
| ZNF438   | 0.944189 | 0.880609 | 1.01236  | 0.106401 |
| CCR3     | 0.989297 | 0.8713   | 1.123273 | 0.868107 |
| ZNF530   | 1.101013 | 1.007885 | 1.202746 | 0.032831 |
| NDUFB1   | 1.232997 | 1.132174 | 1.342797 | 1.49E-06 |
| KLHL25   | 0.892461 | 0.817649 | 0.974118 | 0.010865 |
| TRMT12   | 1.143446 | 1.050012 | 1.245195 | 0.002056 |
| BMP8A    | 0.992807 | 0.913172 | 1.079387 | 0.865624 |
| EFHC2    | 1.049236 | 0.995681 | 1.105672 | 0.072171 |
| NOG      | 1.028522 | 0.980346 | 1.079065 | 0.250567 |
| UPP1     | 1.008519 | 0.957199 | 1.062591 | 0.750216 |
| TRIM52   | 1.071257 | 0.976166 | 1.17561  | 0.146685 |
| CMTM4    | 1.105453 | 1.043595 | 1.170977 | 0.000644 |
| TMEM50A  | 1.063014 | 0.940866 | 1.201021 | 0.326487 |
| ASCL2    | 1.12945  | 1.069233 | 1.193059 | 1.33E-05 |
| TBK1     | 1.000682 | 0.929666 | 1.077124 | 0.985507 |
| CBX6     | 1.140169 | 1.072968 | 1.211579 | 2.31E-05 |
| MACC1    | 1.029286 | 0.975553 | 1.085978 | 0.291341 |
| TBL3     | 1.107102 | 1.007461 | 1.216598 | 0.034477 |
| KREMEN1  | 1.125702 | 1.054315 | 1.201922 | 0.000397 |
| TRAIP    | 1.242876 | 1.127042 | 1.370616 | 1.32E-05 |
| CHEK2    | 1.093146 | 1.012317 | 1.180427 | 0.023067 |
| AIFM3    | 1.044457 | 0.982662 | 1.110138 | 0.162148 |
| ZNF703   | 1.004554 | 0.958441 | 1.052886 | 0.849685 |
| EMILIN3  | 1.207736 | 1.109383 | 1.314808 | 1.33E-05 |
| OLFML1   | 1.204449 | 1.04796  | 1.384306 | 0.008801 |
| RBM12B   | 1.046602 | 0.978489 | 1.119456 | 0.184632 |
| CCR4     | 1.076989 | 1.00375  | 1.155573 | 0.039006 |
| LIN9     | 1.176034 | 1.061587 | 1.302818 | 0.001909 |
| BTBD9    | 0.969923 | 0.903669 | 1.041036 | 0.39759  |
| NUDT14   | 1.291904 | 1.207551 | 1.382149 | 1.05E-13 |
| PNMA3    | 1.129745 | 1.035788 | 1.232226 | 0.005893 |
| IQGAP3   | 1.098114 | 1.036214 | 1.163712 | 0.001569 |
| TOB2     | 0.933866 | 0.868095 | 1.00462  | 0.066318 |
| SCN5A    | 0.969143 | 0.841118 | 1.116655 | 0.664587 |
| ARSI     | 0.98766  | 0.945313 | 1.031904 | 0.578661 |
| UTY      | 1.013648 | 0.986149 | 1.041914 | 0.33403  |
| TTC32    | 0.99709  | 0.911523 | 1.090688 | 0.949235 |
| DNAH2    | 1.059219 | 0.964628 | 1.163085 | 0.228044 |
| SH2D1A   | 1.021803 | 0.975891 | 1.069875 | 0.35781  |
| PRKX     | 0.92105  | 0.859362 | 0.987166 | 0.020063 |
| KCNH8    | 0.931043 | 0.848387 | 1.021752 | 0.131988 |
| SMTN     | 1.193019 | 1.089761 | 1.306061 | 0.000133 |
| NPW      | 0.845227 | 0.808808 | 0.883285 | 7.28E-14 |
| ST6GALNA | 1.300738 | 1.165095 | 1.452173 | 2.88E-06 |
| PTP4A2   | 0.939653 | 0.862771 | 1.023387 | 0.152954 |
| ACTG1    | 0.918469 | 0.850778 | 0.991545 | 0.029456 |
| DENND5A  | 0.838506 | 0.785973 | 0.89455  | 9.52E-08 |
| DIABLO   | 0.974687 | 0.915141 | 1.038107 | 0.425353 |
| VPS33B   | 1.198301 | 1.043113 | 1.376577 | 0.010575 |
| TBX1     | 0.950363 | 0.886836 | 1.018441 | 0.149222 |
| ADAP2    | 1.0547   | 0.998158 | 1.114445 | 0.058175 |
| FAM120C  | 1.046271 | 0.95762  | 1.143129 | 0.316667 |

|          |          |          |          |          |
|----------|----------|----------|----------|----------|
| BRD7P2   | 1.0309   | 0.867319 | 1.225332 | 0.729937 |
| EIF3C    | 0.850261 | 0.765328 | 0.944619 | 0.002519 |
| CLDN5    | 1.113377 | 1.022254 | 1.212623 | 0.013694 |
| NIPSNAP1 | 1.032572 | 0.956484 | 1.114713 | 0.411799 |
| LRTOMT   | 1.099167 | 1.009574 | 1.196711 | 0.029286 |
| ADRA2C   | 0.886378 | 0.837416 | 0.938204 | 3.18E-05 |
| NR2C2AP  | 1.191445 | 1.074937 | 1.320581 | 0.000849 |
| CRELD2   | 1.144586 | 1.04723  | 1.250993 | 0.002906 |
| SCFD2    | 1.089803 | 1.026453 | 1.157061 | 0.004886 |
| UBE2F    | 1.079138 | 0.983282 | 1.184338 | 0.108552 |
| KCNJ12   | 1.147428 | 1.028267 | 1.280397 | 0.013962 |
| GPR173   | 1.097208 | 1.002146 | 1.201288 | 0.044821 |
| PPP1R2   | 0.956061 | 0.876907 | 1.04236  | 0.308174 |
| TSPYL2   | 0.934829 | 0.884455 | 0.988071 | 0.017099 |
| PGP      | 1.112088 | 1.009299 | 1.225345 | 0.031792 |
| SNRNP35  | 1.110265 | 0.975256 | 1.263964 | 0.113829 |
| IRAK1    | 1.151777 | 1.047833 | 1.266032 | 0.003409 |
| OLIG1    | 0.997744 | 0.952974 | 1.044617 | 0.923186 |
| PCDH9    | 1.181189 | 1.113735 | 1.252728 | 2.85E-08 |
| ACOT1    | 1.19487  | 1.077161 | 1.325442 | 0.000766 |
| OAF      | 0.953382 | 0.903019 | 1.006555 | 0.084704 |
| KCNK12   | 1.017777 | 0.900983 | 1.14971  | 0.776916 |
| POU6F1   | 1.027856 | 0.943209 | 1.120101 | 0.530927 |
| TM2D3    | 1.069852 | 0.977352 | 1.171106 | 0.143347 |
| TSSC4    | 0.950566 | 0.863205 | 1.04677  | 0.302687 |
| TACSTD2  | 0.929502 | 0.885656 | 0.975518 | 0.003023 |
| CLECL1   | 1.057011 | 1.011115 | 1.104991 | 0.014365 |
| ZDHHC23  | 1.078124 | 1.009632 | 1.151261 | 0.02469  |
| SRPK3    | 1.149494 | 1.045012 | 1.264424 | 0.004163 |
| EFNA5    | 1.097404 | 1.007859 | 1.194905 | 0.032337 |
| PKP3     | 1.072394 | 0.953834 | 1.205691 | 0.242303 |
| MAP7D2   | 1.034285 | 0.93479  | 1.14437  | 0.513601 |
| CSF1     | 1.120265 | 1.073105 | 1.169497 | 2.28E-07 |
| PLA2G6   | 1.069603 | 0.988315 | 1.157576 | 0.095213 |
| MAML2    | 0.896667 | 0.840692 | 0.956369 | 0.000912 |
| A3GALT2  | 0.956433 | 0.877865 | 1.042031 | 0.30842  |
| SS18L1   | 1.102678 | 1.020669 | 1.191277 | 0.013182 |
| TOP1MT   | 1.016073 | 0.954915 | 1.081148 | 0.614657 |
| COPB2    | 1.038516 | 0.953049 | 1.131648 | 0.388417 |
| LRRC19   | 1.04724  | 0.941001 | 1.165474 | 0.397694 |
| THAP7    | 1.263253 | 1.146596 | 1.391779 | 2.28E-06 |
| KNTC1    | 1.051578 | 0.991412 | 1.115396 | 0.09432  |
| CCR10    | 0.975117 | 0.855476 | 1.11149  | 0.70596  |
| WDR27    | 1.053372 | 0.986005 | 1.125342 | 0.123074 |
| TXNRD2   | 1.092659 | 0.9965   | 1.198097 | 0.059381 |
| FOXO4    | 0.951495 | 0.892579 | 1.0143   | 0.127361 |
| PTP4A3   | 1.12167  | 1.067214 | 1.178906 | 6.13E-06 |
| FOXD4L1  | 1.067475 | 0.963236 | 1.182995 | 0.212948 |
| PROS1    | 1.225728 | 1.164962 | 1.289664 | 4.31E-15 |
| GAST     | 0.940296 | 0.852921 | 1.036622 | 0.21603  |
| HDDC3    | 1.300651 | 1.14414  | 1.478573 | 5.86E-05 |
| BEX5     | 1.187872 | 1.08047  | 1.30595  | 0.00037  |
| ZFP1     | 1.036115 | 0.95306  | 1.126408 | 0.405292 |
| CEND1    | 1.124855 | 0.985629 | 1.283747 | 0.080944 |
| DUSP8    | 0.933783 | 0.895704 | 0.97348  | 0.001259 |
| SOCS3    | 1.040474 | 0.992554 | 1.090708 | 0.099088 |
| LPAR5    | 0.885605 | 0.831001 | 0.943798 | 0.000183 |
| XPOT     | 1.003264 | 0.927979 | 1.084657 | 0.934736 |



|           |          |          |          |          |
|-----------|----------|----------|----------|----------|
| PDE4B     | 0.91389  | 0.866344 | 0.964045 | 0.000956 |
| SNN       | 0.943107 | 0.886262 | 1.003598 | 0.064784 |
| KCNH7     | 0.947636 | 0.826434 | 1.086612 | 0.441115 |
| NELL2     | 0.986907 | 0.934787 | 1.041934 | 0.634018 |
| KRBA2     | 0.978307 | 0.910877 | 1.05073  | 0.54725  |
| MED12     | 0.950351 | 0.885854 | 1.019544 | 0.155559 |
| ZNF93     | 0.91904  | 0.840248 | 1.00522  | 0.064875 |
| CDCA2     | 1.11585  | 1.047624 | 1.188519 | 0.000661 |
| ZBTB40    | 0.99104  | 0.924982 | 1.061816 | 0.798171 |
| EIF4ENIF1 | 1.062987 | 0.975524 | 1.158292 | 0.163221 |
| LRRC26    | 0.972878 | 0.86301  | 1.096733 | 0.652901 |
| ATL3      | 1.033954 | 0.962408 | 1.11082  | 0.361422 |
| NDUFA12   | 1.158327 | 1.059861 | 1.265941 | 0.001184 |
| TCTE3     | 1.107333 | 1.007    | 1.217661 | 0.035385 |
| UBE2G2    | 1.119269 | 1.020856 | 1.227169 | 0.016415 |
| OSBP2     | 1.012038 | 0.969977 | 1.055924 | 0.580602 |
| APOO      | 1.29208  | 1.14409  | 1.459212 | 3.65E-05 |
| PRR16     | 1.138949 | 1.079276 | 1.201921 | 2.15E-06 |
| TMED9     | 1.052326 | 0.960801 | 1.15257  | 0.271937 |
| TMEM186   | 1.178967 | 1.07223  | 1.296328 | 0.000673 |
| SDR42E1   | 1.19301  | 1.060541 | 1.342025 | 0.003295 |
| RBM33     | 0.902905 | 0.839717 | 0.970848 | 0.005794 |
| ARMCX2    | 1.373724 | 1.245448 | 1.515213 | 2.18E-10 |
| BTBD6     | 1.165174 | 1.069038 | 1.269956 | 0.000502 |
| RBM43     | 1.156141 | 1.059565 | 1.26152  | 0.001114 |
| SUMO3     | 1.032025 | 0.934138 | 1.14017  | 0.535267 |
| IMMP2L    | 1.004242 | 0.929027 | 1.085546 | 0.915139 |
| JAG2      | 1.182981 | 1.090328 | 1.283509 | 5.39E-05 |
| FMNL1     | 0.922637 | 0.852158 | 0.998945 | 0.047032 |
| LCN12     | 1.298581 | 1.094624 | 1.54054  | 0.002726 |
| WT1       | 0.981489 | 0.937705 | 1.027318 | 0.422298 |
| ZFP90     | 1.117845 | 1.0314   | 1.211535 | 0.006671 |
| MUC6      | 0.917923 | 0.845563 | 0.996475 | 0.040928 |
| NOC4L     | 1.108053 | 0.995433 | 1.233414 | 0.060619 |
| USP18     | 1.155442 | 1.095666 | 1.21848  | 9.77E-08 |
| NDUFA6    | 1.174399 | 1.06182  | 1.298915 | 0.001768 |
| CHRM5     | 0.998251 | 0.871078 | 1.14399  | 0.979908 |
| SORCS2    | 1.12562  | 1.049026 | 1.207807 | 0.000998 |
| TMEM121   | 1.067792 | 0.986008 | 1.15636  | 0.106664 |
| TMEM106   | 0.910785 | 0.850518 | 0.975324 | 0.007467 |
| SIVA1     | 1.038701 | 0.934441 | 1.154593 | 0.481704 |
| BRI3BP    | 1.055726 | 1.000541 | 1.113954 | 0.047734 |
| DGAT1     | 1.142186 | 1.039086 | 1.255515 | 0.005881 |
| ROBO2     | 1.035065 | 0.954356 | 1.122599 | 0.405379 |
| AP3M1     | 0.966358 | 0.886246 | 1.053712 | 0.43832  |
| F8        | 1.260951 | 1.091545 | 1.456648 | 0.001633 |
| CA13      | 1.269922 | 1.176832 | 1.370376 | 7.65E-10 |
| UBOX5     | 1.021259 | 0.935196 | 1.115242 | 0.639544 |
| MAFF      | 0.939569 | 0.890299 | 0.991565 | 0.023318 |
| BRF1      | 1.067179 | 0.98683  | 1.154071 | 0.103523 |
| SEMA4B    | 1.000181 | 0.934441 | 1.070546 | 0.995836 |
| CIB1      | 1.066484 | 0.961758 | 1.182615 | 0.222248 |
| SLC24A3   | 0.939244 | 0.902534 | 0.977446 | 0.00206  |
| INTS5     | 1.0236   | 0.945366 | 1.108309 | 0.565291 |
| RPS27L    | 1.1084   | 0.985885 | 1.246141 | 0.085052 |
| MANEAL    | 1.136288 | 1.044796 | 1.235792 | 0.002853 |
| ANO9      | 1.097992 | 1.022432 | 1.179136 | 0.010176 |
| FAF1      | 1.069917 | 0.976588 | 1.172166 | 0.146715 |

|           |          |          |          |          |
|-----------|----------|----------|----------|----------|
| FAM43A    | 1.120254 | 1.054581 | 1.190016 | 0.000229 |
| HSF1      | 0.910156 | 0.82462  | 1.004565 | 0.06155  |
| PURA      | 1.155763 | 1.073497 | 1.244334 | 0.000122 |
| INPP5J    | 1.023715 | 0.929702 | 1.127233 | 0.633448 |
| MIXL1     | 1.216546 | 1.066436 | 1.387786 | 0.003531 |
| MFSD6L    | 0.997102 | 0.916673 | 1.084587 | 0.946069 |
| LRRC37B   | 0.902926 | 0.835226 | 0.976114 | 0.010231 |
| DDX51     | 1.12106  | 1.027957 | 1.222596 | 0.009786 |
| NOMO2     | 0.97318  | 0.902018 | 1.049956 | 0.482856 |
| SIGIRR    | 1.094194 | 0.996042 | 1.202019 | 0.060483 |
| NRBP2     | 1.30016  | 1.203736 | 1.404309 | 2.45E-11 |
| IFITM2    | 1.103125 | 1.045432 | 1.164002 | 0.000342 |
| TNFAIP2   | 1.085576 | 1.034192 | 1.139512 | 0.000904 |
| ZNF445    | 1.002021 | 0.941264 | 1.0667   | 0.949548 |
| PGBD2     | 1.117491 | 1.040344 | 1.200358 | 0.002337 |
| RAB11B    | 0.957071 | 0.853935 | 1.072664 | 0.45072  |
| PRMT3     | 1.111165 | 1.02371  | 1.206091 | 0.011727 |
| GP1BA     | 1.125946 | 1.063772 | 1.191754 | 4.26E-05 |
| PRPF39    | 0.998786 | 0.922646 | 1.08121  | 0.97605  |
| PPIL6     | 1.294449 | 1.134336 | 1.477161 | 0.000128 |
| ZNF74     | 1.086138 | 1.010821 | 1.167067 | 0.024228 |
| CDNF      | 0.939327 | 0.850593 | 1.037319 | 0.216355 |
| KLHL33    | 1.048625 | 0.973913 | 1.129068 | 0.208018 |
| RBM11     | 1.301507 | 1.168516 | 1.449633 | 1.65E-06 |
| GALNT17   | 1.043012 | 0.960417 | 1.132709 | 0.317084 |
| ZBTB37    | 1.034588 | 0.968009 | 1.105747 | 0.316379 |
| IL3RA     | 1.025827 | 0.947646 | 1.110457 | 0.528409 |
| CCDC137   | 1.241864 | 1.109237 | 1.39035  | 0.000171 |
| RGPD2     | 1.002089 | 0.937448 | 1.071188 | 0.951089 |
| ARL15     | 1.081838 | 1.010857 | 1.157803 | 0.023096 |
| CDK10     | 1.080112 | 0.99767  | 1.169367 | 0.057122 |
| TMEM105   | 1.154577 | 1.094068 | 1.218433 | 1.67E-07 |
| SOCS1     | 1.036094 | 0.986213 | 1.088498 | 0.158981 |
| TCN2      | 0.992347 | 0.942786 | 1.044512 | 0.768825 |
| GAS2L1    | 0.948712 | 0.894898 | 1.005761 | 0.077204 |
| ATP6V0A2  | 0.98319  | 0.916308 | 1.054954 | 0.637187 |
| HGS       | 0.977349 | 0.900418 | 1.060852 | 0.583868 |
| TNFAIP8L1 | 0.900906 | 0.836754 | 0.969976 | 0.005627 |
| MAPK11    | 0.995245 | 0.937567 | 1.05647  | 0.875652 |
| SP140L    | 0.975172 | 0.9012   | 1.055216 | 0.532204 |
| MRPL30    | 1.031458 | 0.936944 | 1.135506 | 0.527602 |
| SMYD3     | 1.020676 | 0.960652 | 1.084451 | 0.508097 |
| METTL7A   | 1.020459 | 0.9582   | 1.086762 | 0.528335 |
| FAM174B   | 1.020943 | 0.939306 | 1.109675 | 0.625943 |
| TMEM179I  | 1.114743 | 0.999308 | 1.243512 | 0.051469 |
| GPRIN3    | 1.022614 | 0.966796 | 1.081655 | 0.434884 |
| STAC3     | 1.073141 | 1.006051 | 1.144706 | 0.032104 |
| MUC1      | 1.114978 | 1.027528 | 1.20987  | 0.009012 |
| IRF7      | 0.981294 | 0.911853 | 1.056022 | 0.614062 |
| BRCC3     | 1.125909 | 1.021342 | 1.241181 | 0.017099 |
| PDE6G     | 0.942353 | 0.882498 | 1.006267 | 0.076168 |
| NR2F2     | 1.596584 | 1.165404 | 2.187293 | 0.00358  |
| DLK1      | 0.931232 | 0.87163  | 0.994909 | 0.034753 |
| AHNAK2    | 1.128388 | 1.040855 | 1.223283 | 0.003369 |
| OLFML2A   | 1.123894 | 1.078027 | 1.171713 | 3.93E-08 |
| SP1       | 0.955074 | 0.891122 | 1.023616 | 0.193642 |
| WASH3P    | 0.942926 | 0.863234 | 1.029974 | 0.19209  |
| MRPL40    | 1.03777  | 0.918595 | 1.172406 | 0.551388 |

|          |          |          |          |          |
|----------|----------|----------|----------|----------|
| PDIA2    | 1.024607 | 0.93379  | 1.124257 | 0.607708 |
| PCGF3    | 1.002246 | 0.927792 | 1.082675 | 0.954565 |
| LMLN     | 1.171628 | 1.050738 | 1.306427 | 0.004362 |
| P4HB     | 0.910443 | 0.851364 | 0.973622 | 0.006127 |
| PSMD13   | 1.123966 | 0.983139 | 1.284965 | 0.087082 |
| PBX1     | 1.154442 | 1.106324 | 1.204652 | 3.80E-11 |
| NDUFA4L2 | 1.174112 | 1.032836 | 1.334712 | 0.014132 |
| ZFP36L1  | 1.030092 | 0.980468 | 1.082228 | 0.239224 |
| UBE2L3   | 0.977236 | 0.862124 | 1.107718 | 0.718763 |
| BRWD1    | 0.975529 | 0.916605 | 1.03824  | 0.435741 |
| SNAI3    | 1.050497 | 0.972665 | 1.134557 | 0.209735 |
| ZBTB3    | 1.032037 | 0.946644 | 1.125132 | 0.474225 |
| LYG2     | 1.053559 | 0.959572 | 1.156751 | 0.2738   |
| PRAME    | 0.953809 | 0.926804 | 0.981602 | 0.00125  |
| MYBL1    | 1.224456 | 1.109584 | 1.351219 | 5.61E-05 |
| DRG1     | 0.976424 | 0.871122 | 1.094454 | 0.681964 |
| ANKFY1   | 1.014121 | 0.946987 | 1.086014 | 0.68823  |
| YTHDF3   | 0.915093 | 0.856596 | 0.977585 | 0.008474 |
| ZNF696   | 1.128776 | 1.039683 | 1.225504 | 0.003881 |
| ADARB2   | 0.995618 | 0.88907  | 1.114935 | 0.939386 |
| IFIT1    | 1.06259  | 1.011765 | 1.115968 | 0.015195 |
| KCNQ5    | 0.877405 | 0.831009 | 0.926392 | 2.38E-06 |
| MORF4L1  | 0.928685 | 0.845819 | 1.01967  | 0.120783 |
| NLRP9    | 1.144855 | 1.012127 | 1.294988 | 0.031421 |
| WDR53    | 1.144183 | 1.017264 | 1.286938 | 0.02475  |
| DMWD     | 0.999458 | 0.926249 | 1.078453 | 0.988853 |
| PIGP     | 0.880729 | 0.780633 | 0.99366  | 0.039086 |
| IKZF1    | 1.023301 | 0.949961 | 1.102302 | 0.543819 |
| PCYT2    | 1.070087 | 0.976877 | 1.17219  | 0.14516  |
| NAT8L    | 1.087472 | 0.999692 | 1.182959 | 0.050843 |
| BCAP31   | 1.066276 | 0.958733 | 1.185882 | 0.236792 |
| GNB1L    | 0.957931 | 0.888019 | 1.033348 | 0.266328 |
| DNAH14   | 1.042428 | 0.958904 | 1.133228 | 0.329485 |
| EVI2B    | 0.900922 | 0.852786 | 0.951774 | 0.000196 |
| ZNF829   | 1.109634 | 0.998151 | 1.233569 | 0.05414  |
| THNSL1   | 1.112312 | 1.021657 | 1.211011 | 0.014131 |
| TRIM69   | 1.017514 | 0.944152 | 1.096577 | 0.649279 |
| ATP6V0C  | 0.965311 | 0.909577 | 1.02446  | 0.244608 |
| IFITM1   | 1.048409 | 1.000836 | 1.098244 | 0.046018 |
| LAMP1    | 0.947525 | 0.867282 | 1.035193 | 0.232525 |
| TAS2R60  | 0.997278 | 0.936923 | 1.061522 | 0.931817 |
| KLHDC8B  | 1.087881 | 1.022874 | 1.157018 | 0.007376 |
| SETD4    | 1.199637 | 1.091644 | 1.318313 | 0.000156 |
| PTCH1    | 1.070494 | 0.994911 | 1.151818 | 0.068241 |
| RNPC3    | 1.068928 | 0.987514 | 1.157054 | 0.099123 |
| ZNF267   | 1.044861 | 0.976108 | 1.118457 | 0.206361 |
| IRS2     | 0.887323 | 0.842388 | 0.934656 | 6.53E-06 |
| BICD2    | 0.969614 | 0.899639 | 1.045033 | 0.419436 |
| CCIN     | 1.012326 | 0.944693 | 1.084803 | 0.728398 |
| TMLHE    | 0.994981 | 0.908502 | 1.089692 | 0.913633 |
| SDHAP3   | 1.236869 | 1.155478 | 1.323993 | 9.30E-10 |
| RASA3    | 1.091138 | 1.018909 | 1.168487 | 0.012559 |
| LRCH3    | 0.98878  | 0.919789 | 1.062947 | 0.759791 |
| NDUFA13  | 1.022611 | 0.942638 | 1.10937  | 0.590466 |
| ZNF566   | 1.05267  | 0.958377 | 1.15624  | 0.283702 |
| ZNF529   | 0.90903  | 0.848065 | 0.974378 | 0.007086 |
| ZNF284   | 1.265274 | 1.120451 | 1.428816 | 0.000148 |
| DLEU7    | 0.906692 | 0.815041 | 1.008648 | 0.071609 |

|          |          |          |          |          |
|----------|----------|----------|----------|----------|
| KRT73    | 1.094783 | 0.979297 | 1.223888 | 0.111353 |
| AIDA     | 1.007409 | 0.93061  | 1.090547 | 0.855226 |
| CD300LF  | 1.122622 | 1.063768 | 1.184732 | 2.55E-05 |
| CYP2R1   | 0.916491 | 0.842318 | 0.997196 | 0.042848 |
| LRRC70   | 0.990569 | 0.901481 | 1.088461 | 0.843766 |
| ANKRD46  | 1.131438 | 1.032467 | 1.239896 | 0.008191 |
| PIP5K1C  | 0.97756  | 0.904046 | 1.057052 | 0.569364 |
| CYP4F2   | 0.849096 | 0.798629 | 0.902753 | 1.67E-07 |
| ZBTB6    | 1.084879 | 0.997868 | 1.179478 | 0.056143 |
| TAS2R42  | 1.000763 | 0.863945 | 1.159247 | 0.991889 |
| POLR3C   | 1.026324 | 0.919734 | 1.145266 | 0.642342 |
| WWOX     | 1.137708 | 1.048665 | 1.234313 | 0.001918 |
| BCL9L    | 0.991975 | 0.926189 | 1.062433 | 0.817976 |
| POLR1D   | 0.891217 | 0.779    | 1.019598 | 0.093483 |
| KIF18B   | 1.119056 | 1.05469  | 1.187351 | 0.000198 |
| ZNRF1    | 1.021243 | 0.95267  | 1.094752 | 0.553354 |
| CYP4F12  | 1.162939 | 1.028772 | 1.314602 | 0.0158   |
| ZNF749   | 1.049875 | 0.964096 | 1.143286 | 0.263068 |
| BTLA     | 0.954739 | 0.892459 | 1.021366 | 0.178394 |
| ZNF17    | 1.072893 | 0.987944 | 1.165147 | 0.094569 |
| GPAT2    | 1.124222 | 1.037055 | 1.218716 | 0.004461 |
| TOR3A    | 1.050227 | 0.951684 | 1.158973 | 0.329635 |
| PPP1CC   | 1.13782  | 1.030312 | 1.256545 | 0.010783 |
| ZNF555   | 0.980548 | 0.917071 | 1.048418 | 0.565098 |
| NAP1L3   | 1.220246 | 1.14396  | 1.30162  | 1.51E-09 |
| PRELID2  | 0.938076 | 0.872252 | 1.008868 | 0.08505  |
| BACE1    | 1.075763 | 0.997028 | 1.160715 | 0.059672 |
| RGS9BP   | 1.105963 | 1.002382 | 1.220248 | 0.044709 |
| SLC36A3  | 0.900012 | 0.807906 | 1.002619 | 0.055815 |
| RXRA     | 1.116872 | 1.05456  | 1.182865 | 0.000161 |
| ANKRD37  | 1.119922 | 1.030981 | 1.216535 | 0.007305 |
| NUDT17   | 1.015311 | 0.9186   | 1.122203 | 0.766068 |
| ZNF75D   | 1.091381 | 1.005116 | 1.18505  | 0.037394 |
| KRT10    | 1.140601 | 1.063599 | 1.223178 | 0.000225 |
| CD300E   | 1.027168 | 0.993446 | 1.062035 | 0.115516 |
| NKRF     | 0.953962 | 0.863156 | 1.054321 | 0.355746 |
| GLDN     | 1.133078 | 1.057189 | 1.214415 | 0.000412 |
| FCAR     | 0.994283 | 0.961588 | 1.028089 | 0.736783 |
| KPNA4    | 0.991357 | 0.916146 | 1.072743 | 0.829273 |
| ZNF501   | 1.21018  | 1.083006 | 1.352287 | 0.000758 |
| ZNF197   | 1.132229 | 1.040396 | 1.232169 | 0.004008 |
| SPATA12  | 1.047936 | 0.962056 | 1.141482 | 0.283149 |
| AQP7P1   | 1.063897 | 0.989636 | 1.14373  | 0.093395 |
| RPS23    | 0.909712 | 0.841783 | 0.983122 | 0.016854 |
| GNG2     | 0.867784 | 0.822565 | 0.915489 | 2.06E-07 |
| BTN3A2   | 1.060947 | 0.996102 | 1.130013 | 0.065975 |
| AKAP14   | 0.965899 | 0.891431 | 1.046589 | 0.396677 |
| INSIG1   | 1.04771  | 0.971412 | 1.130001 | 0.226997 |
| ZNF396   | 1.251179 | 1.068254 | 1.465426 | 0.005458 |
| TMEM222  | 1.02631  | 0.926781 | 1.136528 | 0.617796 |
| ARHGAP30 | 0.99345  | 0.923076 | 1.069189 | 0.860835 |
| CYP4F3   | 1.045333 | 1.006996 | 1.085129 | 0.020037 |
| SMYD4    | 1.015428 | 0.944539 | 1.091637 | 0.678406 |
| GPATCH8  | 1.041268 | 0.950451 | 1.140764 | 0.385106 |
| CEACAM1  | 1.179011 | 1.086532 | 1.279362 | 7.77E-05 |
| NF2      | 1.080307 | 1.000613 | 1.166347 | 0.048195 |
| SPATC1   | 1.261144 | 1.185067 | 1.342105 | 2.70E-13 |
| UBE2H    | 0.90398  | 0.852491 | 0.958578 | 0.000741 |

|          |          |          |          |          |
|----------|----------|----------|----------|----------|
| HPDL     | 1.096663 | 1.009063 | 1.191867 | 0.029827 |
| KATNA1   | 0.948012 | 0.857848 | 1.047652 | 0.295087 |
| ARAP1    | 1.025281 | 0.964886 | 1.089457 | 0.420246 |
| KIF24    | 1.054918 | 0.985894 | 1.128774 | 0.121501 |
| PDE2A    | 0.892562 | 0.83013  | 0.95969  | 0.002126 |
| PRG2     | 0.875359 | 0.815649 | 0.93944  | 0.000222 |
| PRR5     | 1.089543 | 1.016955 | 1.167313 | 0.014773 |
| ZFP91    | 0.945701 | 0.878676 | 1.017839 | 0.136613 |
| BCDIN3D  | 1.18761  | 1.048418 | 1.345283 | 0.006864 |
| LYRM7    | 1.027992 | 0.955    | 1.106563 | 0.462534 |
| BCR      | 0.912805 | 0.862303 | 0.966265 | 0.00168  |
| FSCN2    | 1.104349 | 1.017194 | 1.19897  | 0.017961 |
| SPIN4    | 1.066228 | 0.994316 | 1.143341 | 0.071866 |
| SPIN2B   | 0.989816 | 0.885908 | 1.105912 | 0.856453 |
| HYAL3    | 0.979463 | 0.923058 | 1.039314 | 0.492897 |
| CXCR3    | 1.075644 | 1.011826 | 1.143488 | 0.019455 |
| ZNF397   | 1.03283  | 0.959147 | 1.112174 | 0.392318 |
| TPCN1    | 1.055757 | 0.987688 | 1.128517 | 0.110568 |
| LILRB4   | 1.082688 | 1.042571 | 1.124348 | 3.72E-05 |
| TNFRSF4  | 1.041175 | 0.993896 | 1.090703 | 0.088804 |
| HEXIM1   | 1.05215  | 0.981316 | 1.128098 | 0.15284  |
| PDZD7    | 1.129171 | 1.052267 | 1.211695 | 0.000737 |
| POFUT2   | 0.980415 | 0.892009 | 1.077584 | 0.681645 |
| ERCC6L   | 1.16076  | 1.066745 | 1.263061 | 0.000542 |
| TMEM17   | 1.103965 | 0.992721 | 1.227674 | 0.067977 |
| TNFRSF18 | 1.049683 | 1.002442 | 1.099151 | 0.039039 |
| RTN4RL2  | 1.002154 | 0.909665 | 1.104046 | 0.965266 |
| ZDHHC17  | 0.975455 | 0.906829 | 1.049276 | 0.50435  |
| P2RY4    | 0.997414 | 0.845395 | 1.176769 | 0.975513 |
| ZNF395   | 0.947742 | 0.893788 | 1.004954 | 0.072699 |
| ZACN     | 1.058082 | 0.963123 | 1.162404 | 0.239283 |
| PPARA    | 1.136102 | 1.046051 | 1.233906 | 0.002458 |
| KANK3    | 0.961595 | 0.883122 | 1.047042 | 0.367258 |
| EMID1    | 1.013209 | 0.970679 | 1.057601 | 0.54866  |
| ACTL7A   | 1.070616 | 0.938574 | 1.221235 | 0.309616 |
| RHD      | 1.025277 | 0.979599 | 1.073084 | 0.28303  |
| ESPN     | 1.042738 | 0.97889  | 1.110749 | 0.194237 |
| GPR141   | 1.007575 | 0.96118  | 1.056209 | 0.7537   |
| TMPRSS6  | 1.355052 | 1.157282 | 1.586619 | 0.00016  |
| TMEM216  | 0.914497 | 0.836823 | 0.999381 | 0.048424 |
| RPS19BP1 | 1.020618 | 0.906258 | 1.149409 | 0.736429 |
| TEAD1    | 0.838521 | 0.738055 | 0.952663 | 0.006836 |
| OR2AK2   | 1.132592 | 1.029509 | 1.245997 | 0.01055  |
| PLCD1    | 1.073293 | 0.990679 | 1.162796 | 0.083486 |
| ENTPD5   | 1.04497  | 0.946234 | 1.154009 | 0.385044 |
| MITF     | 1.07617  | 0.997893 | 1.160587 | 0.05675  |
| HEATR4   | 1.119499 | 1.018122 | 1.230969 | 0.019763 |
| NAP1L1   | 0.856515 | 0.785471 | 0.933985 | 0.000455 |
| LILRA5   | 1.06282  | 1.02398  | 1.103133 | 0.001339 |
| CMC1     | 1.135075 | 0.996662 | 1.29271  | 0.056188 |
| SLIT1    | 1.161979 | 1.05714  | 1.277216 | 0.00186  |
| AKR1C1   | 1.109098 | 1.037527 | 1.185606 | 0.002347 |
| SPATA21  | 0.960912 | 0.904812 | 1.02049  | 0.193906 |
| RNF220   | 1.089139 | 1.017702 | 1.165592 | 0.013629 |
| ZNF546   | 0.991283 | 0.917046 | 1.07153  | 0.825527 |
| TSPYL4   | 1.103264 | 1.012611 | 1.202034 | 0.024677 |
| MT1X     | 1.197026 | 1.127547 | 1.270787 | 3.75E-09 |
| GCNT1    | 1.093416 | 1.031759 | 1.158758 | 0.002564 |

|          |          |          |          |          |
|----------|----------|----------|----------|----------|
| SESTD1   | 1.014495 | 0.965003 | 1.066525 | 0.572796 |
| FNBP1    | 1.011382 | 0.929025 | 1.101039 | 0.793974 |
| DYNC2H1  | 1.2642   | 1.169929 | 1.366067 | 3.04E-09 |
| BCAM     | 1.180871 | 1.110142 | 1.256106 | 1.32E-07 |
| RSBN1L   | 0.954342 | 0.883783 | 1.030534 | 0.23307  |
| WDR86    | 1.037097 | 0.965765 | 1.113699 | 0.316411 |
| EPOR     | 1.074804 | 1.019315 | 1.133314 | 0.007645 |
| TAF9B    | 1.00799  | 0.930026 | 1.092489 | 0.846372 |
| PCDHB13  | 1.116485 | 1.001748 | 1.244364 | 0.046424 |
| FPR3     | 1.091845 | 0.973399 | 1.224704 | 0.133671 |
| KCNJ11   | 0.964019 | 0.855385 | 1.08645  | 0.548029 |
| COL4A1   | 1.323399 | 1.172112 | 1.494212 | 6.07E-06 |
| GJA4     | 1.18865  | 1.114431 | 1.267811 | 1.49E-07 |
| PTMA     | 0.96537  | 0.88303  | 1.055387 | 0.438441 |
| HSPA14   | 0.961319 | 0.883505 | 1.045986 | 0.359663 |
| SIRT7    | 1.171403 | 1.057792 | 1.297216 | 0.002371 |
| IFT140   | 1.035592 | 0.958874 | 1.118447 | 0.373159 |
| TLR5     | 1.106069 | 1.027549 | 1.19059  | 0.00729  |
| USP7     | 0.960413 | 0.887785 | 1.038983 | 0.314044 |
| NANOS3   | 0.94295  | 0.852144 | 1.043431 | 0.255523 |
| NHLRC1   | 1.170314 | 1.059696 | 1.292479 | 0.001906 |
| COX8C    | 1.10428  | 1.006232 | 1.211881 | 0.036535 |
| PLEKHN1  | 1.115671 | 0.99062  | 1.256507 | 0.071139 |
| ZNF385C  | 0.934387 | 0.864468 | 1.00996  | 0.087228 |
| MAGEH1   | 1.254393 | 1.161586 | 1.354616 | 7.50E-09 |
| TET3     | 0.942135 | 0.877904 | 1.011066 | 0.098025 |
| ZNF286A  | 1.226897 | 1.108549 | 1.35788  | 7.78E-05 |
| ISG15    | 1.091803 | 1.038397 | 1.147956 | 0.000598 |
| EXD3     | 1.04062  | 0.953403 | 1.135816 | 0.372643 |
| ZKSCAN4  | 1.036147 | 0.955925 | 1.123101 | 0.387784 |
| DHRS4L2  | 1.167783 | 1.052587 | 1.295587 | 0.003421 |
| SAMD11   | 0.799206 | 0.737387 | 0.866209 | 4.85E-08 |
| VMAC     | 1.021976 | 0.951364 | 1.09783  | 0.551784 |
| SPRY4    | 0.947164 | 0.855037 | 1.049218 | 0.298468 |
| TRPV2    | 1.011093 | 0.944395 | 1.082501 | 0.751369 |
| TMEM203  | 1.072228 | 0.979744 | 1.173443 | 0.129693 |
| KBTBD12  | 1.198298 | 1.076427 | 1.333968 | 0.000947 |
| DNAJB13  | 1.025023 | 0.947217 | 1.109219 | 0.539469 |
| TCEA1    | 0.948387 | 0.86948  | 1.034455 | 0.231832 |
| NHEJ1    | 1.127832 | 1.003212 | 1.267932 | 0.044046 |
| FANCA    | 1.073058 | 0.994775 | 1.157501 | 0.068088 |
| SECISBP2 | 1.000722 | 0.933738 | 1.072511 | 0.983705 |
| OR52B6   | 0.999029 | 0.911305 | 1.095198 | 0.983475 |
| SEMA4D   | 1.109048 | 1.036585 | 1.186577 | 0.00268  |
| LIN28B   | 1.034087 | 0.975026 | 1.096726 | 0.26396  |
| DNAH17   | 1.067181 | 0.973676 | 1.169665 | 0.1646   |
| MCRS1    | 1.164707 | 1.052025 | 1.289458 | 0.003315 |
| TMEM72   | 1.153524 | 1.07669  | 1.235841 | 4.89E-05 |
| FANCM    | 1.064169 | 0.976585 | 1.159608 | 0.155816 |
| ZNF70    | 0.977966 | 0.918254 | 1.04156  | 0.488211 |
| CARD9    | 0.990682 | 0.934649 | 1.050074 | 0.75266  |
| PEAR1    | 0.981513 | 0.927828 | 1.038303 | 0.515551 |
| TMEM220  | 0.96042  | 0.879484 | 1.048804 | 0.368596 |
| EIF4EBP1 | 1.079655 | 1.011765 | 1.152101 | 0.020725 |
| P2RX2    | 1.072445 | 0.973417 | 1.181547 | 0.157095 |
| TTC24    | 0.975824 | 0.921208 | 1.033679 | 0.404972 |
| FAM122A  | 1.098757 | 0.990216 | 1.219196 | 0.07595  |
| CLEC17A  | 0.931919 | 0.866271 | 1.002541 | 0.058508 |

|          |          |          |          |          |
|----------|----------|----------|----------|----------|
| LDLRAD2  | 1.026061 | 0.958217 | 1.098709 | 0.461055 |
| PMS2CL   | 0.961999 | 0.887044 | 1.043289 | 0.349248 |
| CYHR1    | 1.097063 | 0.998634 | 1.205193 | 0.053425 |
| COL14A1  | 0.868898 | 0.797276 | 0.946954 | 0.001366 |
| CPSF4L   | 0.973033 | 0.867729 | 1.091117 | 0.639942 |
| KLHL17   | 1.176582 | 1.091026 | 1.268848 | 2.43E-05 |
| PLA2G2C  | 1.198971 | 1.101085 | 1.305559 | 2.97E-05 |
| ZSCAN23  | 0.81759  | 0.730745 | 0.914756 | 0.00044  |
| RINL     | 1.217184 | 1.131621 | 1.309216 | 1.26E-07 |
| MORN2    | 1.192881 | 1.092098 | 1.302964 | 9.00E-05 |
| S100A3   | 1.301837 | 1.168679 | 1.450166 | 1.66E-06 |
| UBQLN2   | 0.965754 | 0.881058 | 1.058591 | 0.456817 |
| RILPL1   | 0.942469 | 0.860142 | 1.032676 | 0.203905 |
| ZNF490   | 1.030876 | 0.941319 | 1.128953 | 0.511955 |
| CLCN1    | 1.095652 | 0.993493 | 1.208317 | 0.067365 |
| ARL4C    | 1.126512 | 1.073486 | 1.182156 | 1.28E-06 |
| TREML4   | 1.114715 | 1.045285 | 1.188758 | 0.000934 |
| RAB42    | 1.135969 | 1.025714 | 1.258076 | 0.014391 |
| SCGB1C1  | 0.979569 | 0.888035 | 1.080537 | 0.680025 |
| GPR89B   | 1.16283  | 1.057904 | 1.278163 | 0.001768 |
| EYS      | 0.9766   | 0.868618 | 1.098006 | 0.692061 |
| MAPK12   | 0.972996 | 0.910828 | 1.039407 | 0.416425 |
| COL4A5   | 1.033872 | 0.992273 | 1.077215 | 0.111893 |
| AGRN     | 0.866844 | 0.821094 | 0.915142 | 2.40E-07 |
| FAM166A  | 0.963607 | 0.92399  | 1.004922 | 0.083496 |
| ZNF626   | 0.879973 | 0.793034 | 0.976442 | 0.01599  |
| HEPACAM  | 1.029591 | 0.974884 | 1.087367 | 0.295173 |
| ZC3H6    | 0.990054 | 0.912342 | 1.074387 | 0.8106   |
| PRKAR1B  | 1.009904 | 0.933396 | 1.092682 | 0.806315 |
| DCUN1D3  | 1.0169   | 0.951127 | 1.087221 | 0.623271 |
| POTEE    | 0.894054 | 0.740152 | 1.079958 | 0.245278 |
| ZNF793   | 1.083268 | 0.979507 | 1.198021 | 0.119491 |
| COMMD6   | 0.939306 | 0.867196 | 1.017413 | 0.124447 |
| IL17REL  | 1.023943 | 0.939224 | 1.116304 | 0.591285 |
| RUFY4    | 1.200787 | 1.131271 | 1.274575 | 1.81E-09 |
| ZNF383   | 1.102099 | 1.011263 | 1.201095 | 0.026749 |
| HES4     | 0.983908 | 0.93921  | 1.030734 | 0.494057 |
| ZNF669   | 0.982177 | 0.903274 | 1.067972 | 0.673837 |
| CENPP    | 1.13804  | 1.035295 | 1.25098  | 0.007396 |
| PLSCR1   | 1.058833 | 0.988725 | 1.133912 | 0.101933 |
| ZNF559   | 1.100462 | 1.019405 | 1.187965 | 0.014195 |
| SBK1     | 1.053607 | 0.9808   | 1.131818 | 0.152913 |
| SLC38A3  | 0.87636  | 0.775818 | 0.989932 | 0.033777 |
| OR6N2    | 1.130823 | 0.984839 | 1.298446 | 0.081275 |
| GTF2F2   | 0.983455 | 0.884376 | 1.093634 | 0.758134 |
| PRR19    | 0.89767  | 0.78509  | 1.026393 | 0.114348 |
| ZP3      | 0.934191 | 0.84508  | 1.032699 | 0.183223 |
| PDCD1    | 1.034459 | 0.996711 | 1.073638 | 0.074059 |
| CLEC2A   | 1.194794 | 1.142346 | 1.249649 | 7.80E-15 |
| GPR21    | 1.074638 | 1.014342 | 1.138518 | 0.014553 |
| TCTEX1D4 | 1.011492 | 0.960735 | 1.064932 | 0.663554 |
| SELL     | 0.988369 | 0.950498 | 1.027748 | 0.557253 |
| CHM      | 1.031016 | 0.954402 | 1.113781 | 0.438149 |
| CERKL    | 1.036177 | 0.90787  | 1.182617 | 0.598257 |
| IER5L    | 0.993686 | 0.928997 | 1.06288  | 0.853679 |
| FAM83G   | 1.019614 | 0.949036 | 1.095441 | 0.595607 |
| HBA2     | 0.97592  | 0.953024 | 0.999366 | 0.044183 |
| DUSP28   | 1.137694 | 1.032139 | 1.254043 | 0.009412 |

|          |          |          |          |          |
|----------|----------|----------|----------|----------|
| NBR1     | 1.15047  | 1.06081  | 1.247708 | 0.000709 |
| RALGAP2  | 0.937254 | 0.884292 | 0.993389 | 0.029001 |
| NDOR1    | 0.995829 | 0.919213 | 1.078831 | 0.918495 |
| NKAIN2   | 1.236165 | 1.170285 | 1.305754 | 3.26E-14 |
| PAQR9    | 1.083591 | 1.004146 | 1.169322 | 0.038785 |
| CLN3     | 1.300565 | 1.169141 | 1.446764 | 1.33E-06 |
| FAM72B   | 1.216104 | 1.103578 | 1.340104 | 7.83E-05 |
| SUMO2    | 1.103012 | 0.979817 | 1.241695 | 0.104687 |
| NANOS1   | 1.006577 | 0.924678 | 1.095731 | 0.879659 |
| HMX3     | 1.050028 | 1.014432 | 1.086872 | 0.005532 |
| DPYD     | 0.984926 | 0.936933 | 1.035377 | 0.551222 |
| S100A16  | 0.991857 | 0.953689 | 1.031554 | 0.683012 |
| PTAR1    | 1.012535 | 0.938339 | 1.092598 | 0.748342 |
| CC2D2B   | 0.974401 | 0.869306 | 1.092201 | 0.656064 |
| RHCE     | 1.009167 | 0.965429 | 1.054887 | 0.686466 |
| PARVB    | 1.090801 | 1.010321 | 1.177692 | 0.026247 |
| SLC4A5   | 1.070664 | 0.915621 | 1.251959 | 0.392286 |
| UROS     | 1.156438 | 1.053608 | 1.269305 | 0.002221 |
| ZDHHC9   | 0.96161  | 0.880814 | 1.049818 | 0.381996 |
| QRFP     | 1.049406 | 0.948968 | 1.160476 | 0.347475 |
| TMEM120I | 1.061625 | 0.973314 | 1.157948 | 0.17716  |
| RBM34    | 1.080589 | 0.994061 | 1.174648 | 0.068746 |
| NOXA1    | 1.095553 | 1.033188 | 1.161683 | 0.002275 |
| BCL2L15  | 1.051154 | 0.968527 | 1.14083  | 0.232332 |
| FZD9     | 1.139729 | 0.985357 | 1.318287 | 0.078185 |
| SPRED3   | 0.962341 | 0.874214 | 1.059351 | 0.433414 |
| ZNF548   | 0.999058 | 0.926627 | 1.077151 | 0.980427 |
| MTF1     | 0.985494 | 0.910787 | 1.066329 | 0.716389 |
| TMCO2    | 0.921576 | 0.822327 | 1.032804 | 0.160088 |
| TMEM201  | 1.062011 | 0.973454 | 1.158625 | 0.17563  |
| NHLRC3   | 0.96794  | 0.909292 | 1.030371 | 0.306886 |
| HMX2     | 1.079117 | 1.023279 | 1.138003 | 0.004972 |
| ZDHHC11  | 1.026228 | 0.92198  | 1.142263 | 0.635711 |
| CNR2     | 0.960939 | 0.899621 | 1.026436 | 0.236267 |
| ENTPD8   | 1.189072 | 1.0559   | 1.33904  | 0.00427  |
| RPL14    | 0.847444 | 0.778183 | 0.92287  | 0.000142 |
| BEND4    | 1.099807 | 1.039729 | 1.163356 | 0.000902 |
| ZNF563   | 1.107249 | 1.013505 | 1.209663 | 0.023997 |
| TMC3     | 0.968942 | 0.848795 | 1.106097 | 0.640433 |
| FBF1     | 1.298373 | 1.153296 | 1.461701 | 1.57E-05 |
| KLRG2    | 0.764245 | 0.692877 | 0.842965 | 7.65E-08 |
| ASTL     | 0.947909 | 0.898345 | 1.000207 | 0.050889 |
| MSL1     | 0.992681 | 0.916015 | 1.075764 | 0.857843 |
| LRRK2    | 0.996781 | 0.955795 | 1.039525 | 0.880371 |
| TRMT2B   | 1.103979 | 1.00908  | 1.207804 | 0.031001 |
| FAM120AC | 1.098977 | 0.98881  | 1.221418 | 0.079916 |
| NOC2L    | 1.00559  | 0.925428 | 1.092697 | 0.895356 |
| ZNF292   | 0.977422 | 0.922105 | 1.036058 | 0.442332 |
| HUS1B    | 1.048008 | 0.96446  | 1.138794 | 0.268617 |
| KCTD21   | 1.006206 | 0.910839 | 1.111558 | 0.90308  |
| ADAT2    | 1.07848  | 0.999605 | 1.163579 | 0.051204 |
| KIR2DL4  | 1.210116 | 1.099322 | 1.332075 | 9.91E-05 |
| ZNF567   | 1.021539 | 0.936903 | 1.113822 | 0.629137 |
| NDUFA4   | 1.073217 | 0.980254 | 1.174996 | 0.126377 |
| ALKBH2   | 1.087495 | 0.984855 | 1.200833 | 0.097265 |
| RNFT1    | 1.113625 | 1.012029 | 1.225422 | 0.027459 |
| RELN     | 1.03619  | 0.936302 | 1.146735 | 0.491847 |
| FAM111B  | 1.165201 | 1.093341 | 1.241783 | 2.51E-06 |



|           |          |          |          |          |
|-----------|----------|----------|----------|----------|
| LITAF     | 1.007728 | 0.943531 | 1.076294 | 0.818692 |
| VSTM1     | 0.891783 | 0.862402 | 0.922164 | 2.07E-11 |
| TMEM120,  | 1.02404  | 0.935978 | 1.120387 | 0.604601 |
| ARID2     | 1.000785 | 0.941358 | 1.063963 | 0.979961 |
| SF3B3     | 1.021804 | 0.944955 | 1.104902 | 0.588722 |
| BLOC1S3   | 1.192102 | 1.07838  | 1.317815 | 0.000592 |
| SP6       | 1.193368 | 1.072944 | 1.327309 | 0.001125 |
| PLAC9     | 0.954305 | 0.901457 | 1.010252 | 0.107599 |
| ZNF573    | 1.064262 | 0.986807 | 1.147796 | 0.106206 |
| ZNF527    | 1.08753  | 0.988706 | 1.196233 | 0.084296 |
| S100A13   | 1.448971 | 1.285836 | 1.632803 | 1.16E-09 |
| ZNF33A    | 0.988475 | 0.921352 | 1.060489 | 0.746633 |
| ZNF600    | 1.127816 | 1.023833 | 1.24236  | 0.014801 |
| BTBD8     | 1.092463 | 0.999637 | 1.19391  | 0.050944 |
| MAOA      | 1.130309 | 1.03787  | 1.230983 | 0.004896 |
| TSPYL1    | 1.053777 | 0.978476 | 1.134873 | 0.166129 |
| PNRC2     | 1.030389 | 0.945535 | 1.122858 | 0.49478  |
| FHIT      | 0.950335 | 0.871801 | 1.035943 | 0.247048 |
| ZKSCAN3   | 1.01106  | 0.94664  | 1.079864 | 0.743329 |
| RRP7A     | 1.114992 | 1.021451 | 1.2171   | 0.014904 |
| LIN54     | 1.062765 | 0.972353 | 1.161583 | 0.179621 |
| FAM53B    | 1.056325 | 0.987286 | 1.130192 | 0.112078 |
| ALG1L     | 1.121162 | 0.992617 | 1.266353 | 0.065666 |
| GSPT2     | 1.081643 | 1.005735 | 1.16328  | 0.034516 |
| CXCL17    | 1.170969 | 1.069617 | 1.281924 | 0.000633 |
| HMGB1     | 1.102104 | 0.993394 | 1.22271  | 0.066526 |
| SH2D5     | 0.9664   | 0.879472 | 1.061919 | 0.477271 |
| ZFP92     | 1.023616 | 0.954202 | 1.098078 | 0.514734 |
| NCR1      | 1.08046  | 1.006064 | 1.160358 | 0.033499 |
| BLOC1S2   | 1.161652 | 1.036539 | 1.301866 | 0.00996  |
| SYCP2     | 1.132425 | 1.061287 | 1.208332 | 0.000172 |
| IL1RAP    | 0.948725 | 0.891847 | 1.00923  | 0.095178 |
| PAX5      | 0.990268 | 0.945018 | 1.037684 | 0.681936 |
| ZNF699    | 1.072403 | 0.975123 | 1.179387 | 0.149659 |
| TDRD7     | 1.040309 | 0.977623 | 1.107016 | 0.212671 |
| KIAA0895l | 1.127497 | 1.052908 | 1.20737  | 0.00059  |
| HLA-DRB1  | 0.979994 | 0.942729 | 1.018731 | 0.306907 |
| MYT1      | 1.187819 | 1.039686 | 1.357058 | 0.011321 |
| AKR1C3    | 0.9763   | 0.931696 | 1.023039 | 0.314755 |
| SPATS2L   | 1.367618 | 1.270443 | 1.472226 | 8.42E-17 |
| ZNF250    | 1.10165  | 1.006815 | 1.205419 | 0.035044 |
| WDSUB1    | 0.912199 | 0.843717 | 0.986239 | 0.021001 |
| ZNF79     | 1.070901 | 0.990667 | 1.157633 | 0.084714 |
| S100A4    | 1.084003 | 1.034538 | 1.135834 | 0.000712 |
| PLEKHG4   | 1.101292 | 1.036204 | 1.170468 | 0.001908 |
| FAT4      | 1.231321 | 1.13005  | 1.341667 | 2.01E-06 |
| ZNF681    | 0.943775 | 0.861625 | 1.033759 | 0.212984 |
| ACADSB    | 1.070376 | 0.99165  | 1.155353 | 0.081011 |
| STK40     | 0.925629 | 0.85373  | 1.003582 | 0.061029 |
| TMEM63A   | 1.029885 | 0.968264 | 1.095428 | 0.349555 |
| CTSE      | 1.039367 | 0.98892  | 1.092387 | 0.128247 |
| SEMA4A    | 1.035102 | 0.975691 | 1.09813  | 0.252645 |
| MPHOSPI-  | 1.09032  | 0.991934 | 1.198464 | 0.073115 |
| GREB1     | 1.094025 | 1.014826 | 1.179406 | 0.019087 |
| SIRPB2    | 0.923651 | 0.882941 | 0.966238 | 0.000554 |
| ZNF766    | 1.041799 | 0.95938  | 1.131299 | 0.330145 |
| RYR1      | 1.111993 | 1.017599 | 1.215142 | 0.019005 |
| SRGAP3    | 1.203449 | 1.137459 | 1.273267 | 1.22E-10 |

|          |          |          |          |          |
|----------|----------|----------|----------|----------|
| TUBB     | 1.06463  | 0.979385 | 1.157294 | 0.141356 |
| LCOR     | 1.026165 | 0.952357 | 1.105692 | 0.497652 |
| SUPT5H   | 0.953673 | 0.865255 | 1.051126 | 0.339304 |
| XPNPEP3  | 1.065707 | 0.965732 | 1.176033 | 0.205445 |
| ZNF107   | 0.974224 | 0.902851 | 1.051239 | 0.501125 |
| PPIA     | 0.927912 | 0.83676  | 1.028995 | 0.156137 |
| ZNF471   | 0.922067 | 0.835307 | 1.017838 | 0.107554 |
| ZNF836   | 1.103451 | 0.999583 | 1.218112 | 0.050974 |
| ZNF493   | 1.017702 | 0.954536 | 1.085048 | 0.591449 |
| GTF2IRD2 | 1.015499 | 0.909437 | 1.133931 | 0.784643 |
| SUPT3H   | 1.150175 | 1.061496 | 1.246261 | 0.000631 |
| NIF3L1   | 1.092511 | 1.008586 | 1.183418 | 0.030037 |
| ATP2A1   | 0.994316 | 0.91255  | 1.083408 | 0.896412 |
| POM121   | 0.838273 | 0.774498 | 0.9073   | 1.24E-05 |
| ZBTB44   | 1.047619 | 0.972064 | 1.129047 | 0.223195 |
| GIMAP5   | 1.109662 | 1.013524 | 1.214918 | 0.024417 |
| NLGN3    | 0.947367 | 0.888123 | 1.010563 | 0.100788 |
| CD55     | 0.895501 | 0.82753  | 0.969056 | 0.006136 |
| ZNF565   | 0.930556 | 0.856949 | 1.010487 | 0.086926 |
| NTNG2    | 0.871874 | 0.836144 | 0.909131 | 1.34E-10 |
| WDR5     | 1.095135 | 1.000303 | 1.198958 | 0.049239 |
| LONP1    | 0.943391 | 0.873721 | 1.018617 | 0.13656  |
| TRRAP    | 0.964173 | 0.904427 | 1.027865 | 0.263617 |
| NUDT11   | 1.288847 | 1.164939 | 1.425934 | 8.64E-07 |
| FUT4     | 0.943175 | 0.896617 | 0.99215  | 0.023508 |
| ASB13    | 0.947401 | 0.885764 | 1.013328 | 0.115435 |
| ZNF34    | 0.871698 | 0.785912 | 0.966848 | 0.009382 |
| ZNF140   | 1.03883  | 0.957467 | 1.127107 | 0.359945 |
| INCA1    | 1.08882  | 1.014098 | 1.169049 | 0.018981 |
| PTPN1    | 1.028499 | 0.942141 | 1.122771 | 0.530006 |
| EVL      | 1.117921 | 1.047425 | 1.19316  | 0.000796 |
| THEM5    | 1.087784 | 1.012233 | 1.168975 | 0.021962 |
| EPHB4    | 0.9027   | 0.848537 | 0.960321 | 0.001185 |
| PRTN3    | 0.967327 | 0.942393 | 0.99292  | 0.012659 |
| ZNF765   | 1.179584 | 1.068747 | 1.301915 | 0.001036 |
| ZNF124   | 1.047678 | 0.992173 | 1.106288 | 0.093536 |
| XRCC6    | 0.97852  | 0.880633 | 1.087287 | 0.686367 |
| S100A5   | 1.081033 | 0.979829 | 1.192691 | 0.120269 |
| TSC22D2  | 1.050095 | 0.977383 | 1.128216 | 0.181837 |
| ASMT     | 1.003413 | 0.875363 | 1.150193 | 0.960991 |
| ZNF569   | 1.178037 | 1.063561 | 1.304835 | 0.001681 |
| ARMCX4   | 1.098492 | 0.980331 | 1.230896 | 0.105696 |
| YRDC     | 1.066574 | 0.980784 | 1.159867 | 0.131952 |
| ZNF777   | 1.036268 | 0.954728 | 1.124773 | 0.394211 |
| PIK3R4   | 0.947884 | 0.889268 | 1.010364 | 0.100301 |
| ZNF775   | 0.90078  | 0.825951 | 0.982388 | 0.018199 |
| ZNF605   | 1.059051 | 0.965301 | 1.161906 | 0.225054 |
| TRAPPC2  | 1.048837 | 0.965616 | 1.139231 | 0.258291 |
| MYL6B    | 0.999669 | 0.896254 | 1.115016 | 0.995261 |
| ZNF799   | 0.988363 | 0.911424 | 1.071798 | 0.777121 |
| SIAH1    | 0.908907 | 0.848958 | 0.97309  | 0.006078 |
| IPO4     | 1.030507 | 0.929245 | 1.142803 | 0.569062 |
| NCOR2    | 1.055486 | 0.960291 | 1.160118 | 0.262813 |
| SULT1A1  | 0.985404 | 0.90091  | 1.077822 | 0.747854 |
| ARL9     | 1.197275 | 1.082444 | 1.324288 | 0.000465 |
| PRPF40A  | 0.948061 | 0.873991 | 1.028407 | 0.198764 |
| GDAP2    | 1.059674 | 0.984561 | 1.140517 | 0.122305 |
| TCEAL3   | 1.041108 | 0.963886 | 1.124517 | 0.30559  |

|          |          |          |          |          |
|----------|----------|----------|----------|----------|
| ANAPC7   | 1.065146 | 0.983513 | 1.153555 | 0.120825 |
| TPK1     | 0.952645 | 0.874564 | 1.037697 | 0.266195 |
| SLC6A9   | 1.051971 | 1.002388 | 1.104007 | 0.039705 |
| AFAP1    | 0.87064  | 0.764778 | 0.991155 | 0.036235 |
| NACA     | 0.814625 | 0.746407 | 0.889077 | 4.33E-06 |
| MYO18A   | 1.003421 | 0.940897 | 1.070101 | 0.917127 |
| MAN2A2   | 0.962349 | 0.899041 | 1.030115 | 0.268996 |
| MME      | 1.169287 | 1.113744 | 1.2276   | 3.01E-10 |
| FAM72A   | 1.356925 | 1.178216 | 1.56274  | 2.27E-05 |
| CACNA1H  | 0.716186 | 0.655964 | 0.781936 | 9.41E-14 |
| SULF2    | 0.986541 | 0.940878 | 1.034419 | 0.575192 |
| HBG2     | 1.02512  | 0.995403 | 1.055725 | 0.098339 |
| PLXNB2   | 1.016042 | 0.958264 | 1.077304 | 0.594185 |
| XRCC2    | 1.101511 | 1.027743 | 1.180573 | 0.006262 |
| MYO6     | 1.196094 | 1.144865 | 1.249616 | 1.08E-15 |
| HDAC2    | 1.002642 | 0.910065 | 1.104636 | 0.957428 |
| ZNF782   | 1.050402 | 0.980143 | 1.125697 | 0.16388  |
| ZNF846   | 1.054285 | 0.968196 | 1.148029 | 0.223871 |
| MMP1     | 1.297002 | 1.064941 | 1.579631 | 0.009723 |
| TCF4     | 1.179038 | 1.121564 | 1.239457 | 1.05E-10 |
| ZNF136   | 0.981106 | 0.918765 | 1.047677 | 0.569035 |
| ZKSCAN5  | 1.006145 | 0.911716 | 1.110355 | 0.903026 |
| ZNF502   | 1.166346 | 1.05954  | 1.283919 | 0.001688 |
| TRAPPC4  | 0.998959 | 0.899694 | 1.109177 | 0.984444 |
| TTC30B   | 1.088417 | 0.998377 | 1.186578 | 0.054469 |
| TECPR2   | 1.001108 | 0.927702 | 1.080323 | 0.977258 |
| TLR7     | 1.040345 | 0.973136 | 1.112196 | 0.245729 |
| ZFP62    | 1.066087 | 0.986789 | 1.151758 | 0.104647 |
| ERI2     | 1.018319 | 0.939419 | 1.103847 | 0.659082 |
| TOMM7    | 0.940929 | 0.872546 | 1.014671 | 0.113735 |
| HSH2D    | 1.108861 | 1.054334 | 1.166208 | 5.91E-05 |
| TRPV1    | 1.123423 | 1.02529  | 1.230948 | 0.012578 |
| ZNF33B   | 1.023255 | 0.946845 | 1.105832 | 0.56153  |
| ZNF512B  | 0.995747 | 0.930539 | 1.065524 | 0.901831 |
| AMZ2     | 1.133563 | 1.010122 | 1.272089 | 0.033075 |
| ZNF431   | 0.988066 | 0.91866  | 1.062716 | 0.746641 |
| NF1      | 0.975847 | 0.913305 | 1.042671 | 0.469384 |
| VKORC1L1 | 1.081274 | 1.011461 | 1.155907 | 0.021756 |
| ZNF418   | 0.998717 | 0.941168 | 1.059784 | 0.966172 |
| DAPK1    | 1.019655 | 0.969213 | 1.072721 | 0.452099 |
| HLA-DQA  | 0.941418 | 0.900968 | 0.983683 | 0.007056 |
| COL27A1  | 1.082279 | 0.972716 | 1.204183 | 0.146507 |
| GM2A     | 0.982709 | 0.91555  | 1.054794 | 0.62914  |
| S100A2   | 1.106858 | 0.971287 | 1.261353 | 0.127773 |
| ZNF700   | 1.004988 | 0.94392  | 1.070007 | 0.876385 |
| CD47     | 0.962233 | 0.903203 | 1.025121 | 0.233317 |
| TLE1     | 1.005531 | 0.952151 | 1.061904 | 0.842892 |
| MAML3    | 0.968246 | 0.901408 | 1.04004  | 0.376584 |
| STRN3    | 1.018584 | 0.952994 | 1.088687 | 0.58768  |
| ZNF239   | 1.196606 | 1.091968 | 1.311272 | 0.000121 |
| CHRNA1   | 1.141186 | 1.053977 | 1.235611 | 0.00113  |
| ZSCAN16  | 0.986427 | 0.906739 | 1.073117 | 0.750494 |
| ADA      | 0.95594  | 0.899844 | 1.015533 | 0.144176 |
| ARID5A   | 0.962694 | 0.901545 | 1.027989 | 0.256159 |
| PPTC7    | 0.919173 | 0.857972 | 0.98474  | 0.016513 |
| TOMM20L  | 0.917645 | 0.854259 | 0.985734 | 0.018602 |
| RGPD4    | 0.90803  | 0.746002 | 1.105248 | 0.336012 |
| NHLRC2   | 1.002316 | 0.930611 | 1.079545 | 0.951294 |

|          |          |          |          |          |
|----------|----------|----------|----------|----------|
| ZFP28    | 1.112964 | 1.006741 | 1.230396 | 0.036508 |
| CBWD3    | 0.959311 | 0.842646 | 1.092128 | 0.530075 |
| SCN8A    | 1.308707 | 1.164753 | 1.470452 | 6.04E-06 |
| LAMB3    | 1.045705 | 0.989927 | 1.104627 | 0.110052 |
| KPNA5    | 0.967708 | 0.892651 | 1.049077 | 0.425527 |
| ANKRD36f | 1.004474 | 0.942035 | 1.071051 | 0.891555 |
| ARHGEF12 | 1.025707 | 0.979793 | 1.073772 | 0.277346 |
| PDLIM7   | 1.079253 | 1.003838 | 1.160334 | 0.039055 |
| FLNA     | 1.055853 | 0.990458 | 1.125566 | 0.095703 |
| RPS26P11 | 1.040723 | 0.971128 | 1.115307 | 0.258338 |
| SRGAP1   | 1.267571 | 1.172934 | 1.369842 | 2.11E-09 |
| FAM3C    | 0.937289 | 0.862139 | 1.018989 | 0.128807 |
| SLC39A10 | 1.008169 | 0.944212 | 1.076458 | 0.807775 |
| CASP4    | 0.843647 | 0.769301 | 0.925177 | 0.000304 |
| AP2A1    | 0.962536 | 0.881378 | 1.051167 | 0.395536 |
| ZNF585A  | 1.136004 | 1.012709 | 1.27431  | 0.0296   |
| FUT11    | 1.009625 | 0.930489 | 1.095491 | 0.818089 |
| ANXA4    | 1.092573 | 1.010893 | 1.180852 | 0.025532 |
| LAGE3    | 1.175931 | 1.075637 | 1.285577 | 0.000367 |
| WDR5B    | 1.01489  | 0.950224 | 1.083957 | 0.659927 |
| WDR45    | 1.11907  | 0.994368 | 1.25941  | 0.062003 |
| METTL9   | 0.982609 | 0.886417 | 1.089239 | 0.738551 |
| ZNF138   | 0.980985 | 0.900917 | 1.068169 | 0.658545 |
| ZNF429   | 1.047203 | 0.96366  | 1.137989 | 0.276897 |
| ZNF470   | 1.304255 | 1.147613 | 1.482278 | 4.72E-05 |
| SERTAD1  | 0.951913 | 0.893206 | 1.014478 | 0.129167 |
| ZNF100   | 1.010006 | 0.937261 | 1.088397 | 0.794048 |
| ZNF398   | 1.048738 | 0.967339 | 1.136985 | 0.24833  |
| ANXA6    | 0.962799 | 0.913456 | 1.014808 | 0.157848 |
| ZNF441   | 1.071854 | 0.988049 | 1.162766 | 0.094816 |
| GMFB     | 1.016246 | 0.935743 | 1.103673 | 0.701933 |
| SIGLEC15 | 0.951314 | 0.889681 | 1.017218 | 0.144169 |
| ZNF420   | 1.146299 | 1.043618 | 1.259082 | 0.00435  |
| ZNF763   | 0.986815 | 0.880995 | 1.105346 | 0.818606 |
| ZMYM1    | 1.03727  | 0.965589 | 1.114272 | 0.316567 |
| MAFG     | 0.983722 | 0.921784 | 1.049823 | 0.620871 |
| ARRDC1   | 0.906716 | 0.831891 | 0.98827  | 0.025849 |
| KIAA1671 | 1.300073 | 1.127324 | 1.499294 | 0.000309 |
| IGF2R    | 1.095133 | 1.045906 | 1.146677 | 0.000108 |
| GAL3ST4  | 1.020831 | 0.954897 | 1.091318 | 0.545039 |
| DYNC1H1  | 0.970141 | 0.912442 | 1.031489 | 0.332566 |
| PCBP2    | 0.936835 | 0.852839 | 1.029103 | 0.173385 |
| ZGPAT    | 1.076142 | 0.970481 | 1.193307 | 0.164012 |
| SLC25A29 | 0.848829 | 0.801886 | 0.89852  | 1.64E-08 |
| PGAP1    | 1.026171 | 0.951016 | 1.107267 | 0.505583 |
| SRC      | 1.09464  | 1.039971 | 1.152183 | 0.000541 |
| ZNF682   | 0.971861 | 0.89991  | 1.049565 | 0.46705  |
| ZNF772   | 1.013381 | 0.94256  | 1.089524 | 0.719138 |
| ZNF257   | 0.917472 | 0.839382 | 1.002827 | 0.057726 |
| ADAM32   | 1.044391 | 0.939208 | 1.161354 | 0.422581 |
| ACSL5    | 1.197044 | 1.104983 | 1.296776 | 1.06E-05 |
| LRR8B    | 0.921791 | 0.8679   | 0.979029 | 0.008061 |
| ABC8B    | 1.161321 | 1.057026 | 1.275907 | 0.001839 |
| SND1     | 0.91383  | 0.846894 | 0.986057 | 0.020247 |
| ZNF785   | 1.078071 | 0.999412 | 1.16292  | 0.051805 |
| SULT1A2  | 0.862483 | 0.753698 | 0.986971 | 0.031507 |
| NEK5     | 1.238123 | 1.080443 | 1.418814 | 0.002118 |
| PSMD12   | 0.961296 | 0.894411 | 1.033182 | 0.283362 |

|          |          |          |          |          |
|----------|----------|----------|----------|----------|
| PIWIL2   | 1.037018 | 0.913567 | 1.177151 | 0.574057 |
| SLC22A4  | 0.958259 | 0.907624 | 1.011718 | 0.123715 |
| ENTPD4   | 0.977735 | 0.917952 | 1.041412 | 0.484264 |
| C1D      | 0.994626 | 0.892029 | 1.109025 | 0.922726 |
| TBC1D9B  | 1.002975 | 0.927228 | 1.08491  | 0.940894 |
| SERPINA1 | 0.951513 | 0.919732 | 0.984393 | 0.004137 |
| TPSB2    | 0.886767 | 0.857737 | 0.91678  | 1.48E-12 |
| KANK2    | 1.127957 | 1.060921 | 1.199228 | 0.000117 |
| GTF2E2   | 1.039282 | 0.948709 | 1.138503 | 0.40756  |
| IL27     | 1.170267 | 1.08258  | 1.265056 | 7.60E-05 |
| GUCA2A   | 0.864188 | 0.739281 | 1.010198 | 0.066866 |
| ZNF165   | 0.967578 | 0.905067 | 1.034407 | 0.333426 |
| SYNGAP1  | 0.981847 | 0.913144 | 1.055718 | 0.620611 |
| FITM2    | 1.154988 | 1.059083 | 1.259576 | 0.001123 |
| BLM      | 1.104074 | 1.023598 | 1.190877 | 0.010348 |
| ZNF720   | 1.038381 | 0.949691 | 1.135353 | 0.408353 |
| DDI2     | 0.967544 | 0.905847 | 1.033442 | 0.326367 |
| SVIL     | 0.972233 | 0.909396 | 1.039411 | 0.408772 |
| TRIM33   | 0.961848 | 0.89281  | 1.036225 | 0.306028 |
| LRP10    | 1.066834 | 0.979769 | 1.161636 | 0.136378 |
| PELI1    | 1.030438 | 0.976726 | 1.087103 | 0.272304 |
| ZNF655   | 0.932656 | 0.863663 | 1.00716  | 0.075402 |
| MRPL21   | 1.066041 | 0.943704 | 1.204236 | 0.303812 |
| LYPD2    | 0.931868 | 0.83833  | 1.035843 | 0.191054 |
| UAP1L1   | 1.019008 | 0.957939 | 1.08397  | 0.550396 |
| FBXL22   | 1.065463 | 0.984975 | 1.152529 | 0.1136   |
| ZNF786   | 0.979226 | 0.909755 | 1.054001 | 0.576062 |
| ZNF517   | 1.065327 | 0.968175 | 1.172227 | 0.194611 |
| ZNF675   | 0.959492 | 0.879015 | 1.047338 | 0.354883 |
| SLC22A5  | 1.265088 | 1.157918 | 1.382177 | 1.92E-07 |
| DACT3    | 1.088276 | 1.004755 | 1.17874  | 0.037856 |
| ADARB1   | 1.183974 | 1.111394 | 1.261295 | 1.68E-07 |
| HTT      | 0.987659 | 0.92905  | 1.049965 | 0.690736 |
| OR6N1    | 1.082292 | 0.941036 | 1.244753 | 0.267748 |
| C5AR1    | 0.95362  | 0.920055 | 0.988409 | 0.009385 |
| VEPH1    | 1.051801 | 0.898817 | 1.230824 | 0.528847 |
| SHPK     | 1.326052 | 1.164261 | 1.510327 | 2.13E-05 |
| IPP      | 1.310118 | 1.196287 | 1.43478  | 5.73E-09 |
| MAP3K5   | 1.060666 | 0.995035 | 1.130627 | 0.070726 |
| CYP2F1   | 1.265898 | 1.099368 | 1.457653 | 0.001051 |
| GSTK1    | 1.01591  | 0.928466 | 1.11159  | 0.731049 |
| HNRNPAB  | 1.10676  | 1.006597 | 1.216891 | 0.036099 |
| STMN3    | 0.93314  | 0.872432 | 0.998073 | 0.043784 |
| PDGFA    | 1.087336 | 1.022875 | 1.15586  | 0.007246 |
| GYPE     | 1.026919 | 0.982387 | 1.07347  | 0.240248 |
| SPN      | 1.026752 | 0.973434 | 1.08299  | 0.331883 |
| ZNF695   | 1.010406 | 0.911315 | 1.120272 | 0.844163 |
| ZNF628   | 0.859452 | 0.79218  | 0.932436 | 0.00027  |
| SLC2A10  | 1.22692  | 1.154487 | 1.303898 | 4.49E-11 |
| ZNF665   | 1.123999 | 0.980187 | 1.28891  | 0.094236 |
| RPF2     | 0.949722 | 0.854915 | 1.055042 | 0.336351 |
| SLC28A3  | 0.914881 | 0.867897 | 0.964409 | 0.000942 |
| FAM177B  | 1.041521 | 0.914268 | 1.186486 | 0.540622 |
| MIB2     | 0.956186 | 0.880584 | 1.038278 | 0.286373 |
| MYO5A    | 0.935574 | 0.874323 | 1.001116 | 0.053894 |
| GZMM     | 0.977815 | 0.916465 | 1.043272 | 0.497386 |
| ATG7     | 1.029538 | 0.967504 | 1.095549 | 0.358574 |
| SIPA1L1  | 0.86232  | 0.807852 | 0.92046  | 8.60E-06 |

|          |          |          |          |          |
|----------|----------|----------|----------|----------|
| TTC30A   | 1.274235 | 1.125465 | 1.442669 | 0.00013  |
| ELANE    | 0.933069 | 0.911147 | 0.955518 | 1.12E-08 |
| RAB40C   | 0.934952 | 0.863499 | 1.012317 | 0.097285 |
| PIGN     | 1.093028 | 1.013581 | 1.178703 | 0.020871 |
| ZNF624   | 1.033866 | 0.947305 | 1.128337 | 0.455342 |
| HHLA3    | 1.022237 | 0.940891 | 1.110616 | 0.603168 |
| HOXA4    | 1.166091 | 1.110879 | 1.224048 | 5.34E-10 |
| TOPORS   | 0.943779 | 0.88065  | 1.011433 | 0.101394 |
| BCO2     | 1.061077 | 0.938379 | 1.199819 | 0.344374 |
| ENTPD6   | 1.018236 | 0.935553 | 1.108225 | 0.675779 |
| KLKP1    | 1.07671  | 0.959584 | 1.208132 | 0.208446 |
| FAR1     | 1.038995 | 0.975369 | 1.106772 | 0.235436 |
| ZNF841   | 1.062498 | 1.006054 | 1.122109 | 0.029504 |
| VN1R5    | 0.939891 | 0.850408 | 1.038789 | 0.224579 |
| ZNF615   | 1.078139 | 0.994389 | 1.168943 | 0.068216 |
| CDC42SE1 | 0.985368 | 0.916248 | 1.059702 | 0.691195 |
| MPEG1    | 1.035454 | 1.005035 | 1.066793 | 0.022016 |
| SERPINB2 | 0.988499 | 0.952844 | 1.025489 | 0.537152 |
| DPP4     | 1.254795 | 1.142226 | 1.378458 | 2.21E-06 |
| PDCD1LG2 | 1.306104 | 1.145287 | 1.489502 | 6.79E-05 |
| ZNF433   | 0.970474 | 0.911863 | 1.032852 | 0.3457   |
| DNAH10   | 1.243425 | 1.106173 | 1.397707 | 0.000261 |
| SPTAN1   | 0.945386 | 0.881525 | 1.013874 | 0.115525 |
| NMB      | 0.96553  | 0.882417 | 1.056472 | 0.444991 |
| KLHL14   | 1.091665 | 1.002093 | 1.189244 | 0.04466  |
| FAM114A1 | 0.880564 | 0.803001 | 0.96562  | 0.006859 |
| RPE      | 1.040488 | 0.98028  | 1.104393 | 0.191873 |
| ZNF460   | 0.983102 | 0.935148 | 1.033515 | 0.50417  |
| CR1L     | 1.06827  | 1.014739 | 1.124624 | 0.011809 |
| PHF2     | 1.047771 | 0.958312 | 1.145582 | 0.305445 |
| RPS26    | 0.975383 | 0.927153 | 1.026121 | 0.335375 |
| PSAP     | 1.019757 | 0.954235 | 1.089779 | 0.56366  |
| S100A10  | 0.984743 | 0.951873 | 1.018748 | 0.374753 |
| LHFPL5   | 0.981015 | 0.916916 | 1.049596 | 0.578242 |
| RPL37A   | 0.889717 | 0.829832 | 0.953922 | 0.001013 |
| CFD      | 0.928058 | 0.900547 | 0.956409 | 1.16E-06 |
| EME2     | 1.127822 | 1.038325 | 1.225033 | 0.004351 |
| KLHDC1   | 0.979505 | 0.902143 | 1.063501 | 0.621788 |
| ZNF81    | 1.069959 | 0.991442 | 1.154694 | 0.082045 |
| TAF13    | 0.99868  | 0.922943 | 1.080631 | 0.973808 |
| ZNF780A  | 1.089868 | 1.011781 | 1.173982 | 0.023285 |
| ATAD3A   | 0.914643 | 0.841402 | 0.994261 | 0.03616  |
| FAM118B  | 1.046557 | 0.965349 | 1.134597 | 0.269495 |
| ZNF461   | 0.977338 | 0.902492 | 1.058391 | 0.572819 |
| SLC9A8   | 1.014694 | 0.939465 | 1.095947 | 0.710533 |
| OCLN     | 1.093368 | 1.033997 | 1.156149 | 0.001727 |
| ZNF181   | 1.16273  | 1.031794 | 1.310282 | 0.013382 |
| ZNF44    | 0.952358 | 0.888353 | 1.020973 | 0.169067 |
| GPAA1    | 1.179957 | 1.077957 | 1.29161  | 0.000334 |
| ADAMTSL1 | 1.260207 | 1.150913 | 1.379879 | 5.83E-07 |
| SGTB     | 0.998272 | 0.934154 | 1.06679  | 0.95927  |
| ZNF790   | 0.956369 | 0.880608 | 1.038648 | 0.289402 |
| PRB3     | 0.970799 | 0.895388 | 1.052561 | 0.472555 |
| MYO1C    | 0.970959 | 0.917254 | 1.027809 | 0.310039 |
| NKIRAS1  | 0.906016 | 0.844747 | 0.971729 | 0.005732 |
| SLC22A12 | 1.020307 | 0.929657 | 1.119796 | 0.671944 |
| KIF13B   | 0.93892  | 0.879487 | 1.002369 | 0.058886 |
| ADH5     | 0.969382 | 0.882327 | 1.065026 | 0.517166 |

|          |          |          |          |          |
|----------|----------|----------|----------|----------|
| TEAD4    | 1.012593 | 0.937745 | 1.093415 | 0.749423 |
| SPG7     | 0.981136 | 0.911787 | 1.055758 | 0.610608 |
| ZNF677   | 1.125183 | 1.026945 | 1.23282  | 0.011394 |
| ZNF823   | 0.937417 | 0.863125 | 1.018103 | 0.12501  |
| ZNF311   | 1.362668 | 1.20191  | 1.544927 | 1.36E-06 |
| ZNF347   | 1.079866 | 0.989977 | 1.177916 | 0.083133 |
| PLCG2    | 1.042082 | 0.976551 | 1.11201  | 0.21353  |
| FCHSD1   | 1.06642  | 0.992411 | 1.145948 | 0.079707 |
| ZNF71    | 1.082048 | 0.995289 | 1.17637  | 0.064426 |
| S100A6   | 1.093659 | 1.038725 | 1.151499 | 0.000662 |
| RPL12    | 0.912884 | 0.848585 | 0.982055 | 0.01445  |
| DNM3     | 1.201929 | 1.137422 | 1.270095 | 6.36E-11 |
| ZNF121   | 1.040596 | 0.97473  | 1.110912 | 0.232952 |
| MPZL1    | 1.036673 | 0.968979 | 1.109096 | 0.295867 |
| VPS13A   | 1.049009 | 0.989168 | 1.11247  | 0.110367 |
| MBP      | 1.16605  | 1.075328 | 1.264427 | 0.000201 |
| ELOVL2   | 1.080184 | 0.964963 | 1.209162 | 0.180167 |
| LEKR1    | 0.998619 | 0.872768 | 1.142618 | 0.98396  |
| SNHG12   | 0.999908 | 0.937877 | 1.066041 | 0.997749 |
| CLEC9A   | 1.091013 | 1.021686 | 1.165045 | 0.00931  |
| KEL      | 1.022691 | 0.987225 | 1.059431 | 0.212773 |
| NOL8     | 1.053561 | 0.970398 | 1.143849 | 0.21361  |
| IRAK4    | 1.094515 | 1.006374 | 1.190375 | 0.035006 |
| MRPL42   | 1.192579 | 1.08472  | 1.311163 | 0.000271 |
| ENTPD7   | 1.056561 | 0.992465 | 1.124797 | 0.084872 |
| FCGR1B   | 0.970992 | 0.898718 | 1.049077 | 0.455711 |
| ZNF335   | 0.940306 | 0.877056 | 1.008117 | 0.083199 |
| RPS4X    | 0.893884 | 0.831968 | 0.960409 | 0.002192 |
| ZNF273   | 1.001108 | 0.92517  | 1.083279 | 0.978056 |
| ZNF84    | 1.027547 | 0.950611 | 1.11071  | 0.493735 |
| MAK16    | 1.116347 | 1.015427 | 1.227297 | 0.022807 |
| ZNF667   | 0.969347 | 0.904254 | 1.039126 | 0.380047 |
| AVPR1B   | 0.831155 | 0.747477 | 0.924201 | 0.000636 |
| SIRPA    | 1.042544 | 0.985913 | 1.102428 | 0.143714 |
| GRK6     | 1.0295   | 0.955104 | 1.109691 | 0.447441 |
| PRIM1    | 1.102033 | 1.010986 | 1.201279 | 0.027223 |
| SULT1C4  | 0.958684 | 0.902876 | 1.017942 | 0.167948 |
| CD2AP    | 0.956394 | 0.895133 | 1.021846 | 0.1868   |
| NUP62CL  | 1.239647 | 1.171031 | 1.312284 | 1.42E-13 |
| SFI1     | 1.056356 | 0.981096 | 1.137389 | 0.145983 |
| ZNF649   | 0.991114 | 0.912281 | 1.076759 | 0.832836 |
| ZNF248   | 1.062116 | 0.98461  | 1.145723 | 0.119049 |
| LPAR1    | 1.01172  | 0.945311 | 1.082795 | 0.736585 |
| HIBCH    | 1.14235  | 1.060566 | 1.23044  | 0.000446 |
| ZNF544   | 0.948876 | 0.894834 | 1.006182 | 0.079432 |
| TMEM229  | 1.216927 | 1.13636  | 1.303206 | 1.94E-08 |
| ZNF770   | 1.009918 | 0.947076 | 1.07693  | 0.763349 |
| MIER1    | 0.967182 | 0.894929 | 1.045268 | 0.399596 |
| MAN1A2   | 1.02342  | 0.943403 | 1.110224 | 0.577308 |
| SVIP     | 1.194284 | 1.09665  | 1.300609 | 4.50E-05 |
| ZNF251   | 1.048294 | 0.958401 | 1.146618 | 0.302501 |
| DDRGK1   | 1.058258 | 0.942119 | 1.188714 | 0.339731 |
| TFDP1    | 1.024619 | 0.951804 | 1.103005 | 0.517868 |
| CLEC4C   | 1.046357 | 0.980921 | 1.116158 | 0.169038 |
| ZNF607   | 1.05924  | 0.963849 | 1.164072 | 0.231988 |
| ZNF334   | 1.293301 | 1.207121 | 1.385634 | 2.67E-13 |
| HSD17B11 | 0.760966 | 0.706446 | 0.819694 | 5.94E-13 |
| ZXDA     | 0.934938 | 0.86765  | 1.007444 | 0.077505 |

|          |          |          |          |          |
|----------|----------|----------|----------|----------|
| RPS6KL1  | 0.886283 | 0.832162 | 0.943924 | 0.000173 |
| QRICH1   | 0.933392 | 0.851944 | 1.022628 | 0.138966 |
| CSF2RA   | 1.085248 | 1.021867 | 1.152559 | 0.00771  |
| DDX42    | 0.917565 | 0.848869 | 0.99182  | 0.030246 |
| RPL23A   | 0.958449 | 0.905927 | 1.014016 | 0.139969 |
| SLC29A3  | 1.306924 | 1.19474  | 1.429643 | 5.05E-09 |
| STYX     | 1.018553 | 0.936813 | 1.107426 | 0.666684 |
| UBL5     | 1.129962 | 1.005785 | 1.26947  | 0.039678 |
| HELZ     | 0.98771  | 0.918653 | 1.061959 | 0.738086 |
| TMEM116  | 1.102143 | 0.991264 | 1.225425 | 0.072214 |
| UCKL1    | 1.009092 | 0.897049 | 1.135129 | 0.880192 |
| CARD11   | 1.020211 | 0.962365 | 1.081533 | 0.501663 |
| ZNF485   | 1.168679 | 1.077177 | 1.267954 | 0.000179 |
| SDAD1    | 1.171402 | 1.082299 | 1.267841 | 8.88E-05 |
| HYLS1    | 1.101079 | 1.000197 | 1.212137 | 0.049532 |
| MYL4     | 1.024385 | 0.989423 | 1.060583 | 0.173893 |
| ZNF442   | 1.165668 | 1.045761 | 1.299323 | 0.005642 |
| ZNF813   | 1.08101  | 0.989346 | 1.181167 | 0.084882 |
| HOXC4    | 1.278117 | 1.175689 | 1.389469 | 8.53E-09 |
| PIM3     | 0.956428 | 0.902416 | 1.013673 | 0.13308  |
| ASPH     | 0.946295 | 0.884208 | 1.012741 | 0.11087  |
| SPRED2   | 1.012093 | 0.950173 | 1.078047 | 0.709019 |
| WWP2     | 1.039234 | 0.936353 | 1.153418 | 0.469347 |
| GFPT1    | 0.935888 | 0.870011 | 1.006754 | 0.075205 |
| UVRAG    | 0.947122 | 0.879343 | 1.020126 | 0.15157  |
| ZNF26    | 1.066408 | 0.970057 | 1.172328 | 0.183269 |
| ITSN2    | 1.001585 | 0.928574 | 1.080337 | 0.967277 |
| NTRK1    | 0.89337  | 0.850148 | 0.93879  | 8.34E-06 |
| MT1F     | 1.196596 | 1.135904 | 1.26053  | 1.40E-11 |
| ZNF69    | 0.976632 | 0.915446 | 1.041909 | 0.473817 |
| TXNRD1   | 0.952256 | 0.888045 | 1.021111 | 0.169611 |
| NRARP    | 0.951797 | 0.886709 | 1.021663 | 0.171639 |
| ZNF583   | 1.460245 | 1.250815 | 1.70474  | 1.64E-06 |
| ZNF568   | 1.195386 | 1.064086 | 1.342889 | 0.002644 |
| ZXDB     | 0.915437 | 0.8496   | 0.986377 | 0.020332 |
| ZNF480   | 1.120429 | 1.020224 | 1.230476 | 0.017368 |
| ZNF587   | 1.058074 | 0.981863 | 1.1402   | 0.138854 |
| TPM2     | 1.135428 | 1.060518 | 1.215629 | 0.000265 |
| SH3BGRL2 | 1.067694 | 1.004293 | 1.135099 | 0.035984 |
| ZNF808   | 0.974444 | 0.909635 | 1.04387  | 0.460966 |
| ANKRD35  | 1.125918 | 1.009994 | 1.255147 | 0.032408 |
| YTHDF2   | 0.999885 | 0.920085 | 1.086606 | 0.99783  |
| NBR2     | 0.969375 | 0.902226 | 1.041522 | 0.395761 |
| HLA-DRB5 | 1.00102  | 0.966672 | 1.036588 | 0.954377 |
| ATL1     | 0.969594 | 0.874708 | 1.074774 | 0.556778 |
| MAFK     | 0.958538 | 0.905536 | 1.014642 | 0.144532 |
| ZNF43    | 0.988501 | 0.934513 | 1.045607 | 0.686488 |
| GPN1     | 1.050776 | 0.93924  | 1.175557 | 0.386986 |
| PLN      | 1.026747 | 0.96327  | 1.094406 | 0.417555 |
| ZNF28    | 1.061555 | 0.981725 | 1.147876 | 0.134247 |
| ZNF511   | 0.984578 | 0.867426 | 1.117552 | 0.809973 |
| ZNF627   | 1.112873 | 1.029453 | 1.203054 | 0.007143 |
| KCNRG    | 1.165335 | 1.034766 | 1.31238  | 0.011615 |
| WDHD1    | 1.101646 | 1.024301 | 1.184831 | 0.009149 |
| ZNF789   | 1.020088 | 0.954215 | 1.090509 | 0.559261 |
| CTNND1   | 1.014017 | 0.949338 | 1.083103 | 0.67892  |
| SLC34A3  | 1.14195  | 1.023452 | 1.274169 | 0.017564 |
| SH2D1B   | 1.118969 | 1.027542 | 1.218532 | 0.009746 |



|          |          |          |          |          |
|----------|----------|----------|----------|----------|
| ARC      | 0.797337 | 0.755915 | 0.841029 | 8.76E-17 |
| NUDT16   | 1.013994 | 0.944925 | 1.088111 | 0.699432 |
| TLK1     | 0.952051 | 0.883809 | 1.025563 | 0.195386 |
| LRBA     | 1.042522 | 0.987775 | 1.100304 | 0.130271 |
| MMP17    | 0.939508 | 0.88451  | 0.997926 | 0.042621 |
| BAZ1A    | 1.040683 | 0.963196 | 1.124404 | 0.312445 |
| AKR1C4   | 1.087801 | 0.976485 | 1.211807 | 0.126528 |
| COPS8    | 1.053999 | 0.951428 | 1.167629 | 0.314038 |
| CCDC69   | 0.960059 | 0.888024 | 1.037938 | 0.305707 |
| MDM4     | 0.966127 | 0.90674  | 1.029404 | 0.287044 |
| KLHL9    | 1.031488 | 0.951669 | 1.118001 | 0.450582 |
| NCOA6    | 0.955619 | 0.860112 | 1.061732 | 0.398122 |
| STK39    | 1.044276 | 0.973451 | 1.120254 | 0.226648 |
| CALM1    | 1.083952 | 0.985393 | 1.19237  | 0.097435 |
| TTC37    | 1.018284 | 0.951262 | 1.090029 | 0.601953 |
| TUSC1    | 1.017784 | 0.960275 | 1.078737 | 0.552497 |
| PAPSS2   | 0.95534  | 0.889273 | 1.026314 | 0.211455 |
| SLC9A6   | 1.121701 | 1.02697  | 1.22517  | 0.010738 |
| EIF1AY   | 1.018561 | 0.98349  | 1.054882 | 0.303608 |
| IPO9     | 1.127935 | 1.039106 | 1.224359 | 0.004021 |
| CEP290   | 1.089685 | 0.983119 | 1.207802 | 0.101897 |
| DLL1     | 1.057078 | 1.001177 | 1.1161   | 0.045241 |
| ANKRD13F | 0.931675 | 0.865403 | 1.003022 | 0.060132 |
| UNC13B   | 1.2033   | 1.127346 | 1.284371 | 2.65E-08 |
| LDB1     | 0.960171 | 0.892158 | 1.03337  | 0.278243 |
| PPP1R14C | 1.159392 | 1.052113 | 1.27761  | 0.002832 |
| CTR9     | 1.119877 | 1.034078 | 1.212796 | 0.00537  |
| F5       | 0.951289 | 0.897477 | 1.008327 | 0.092794 |
| ZNF652   | 1.098993 | 1.022169 | 1.181592 | 0.01068  |
| SMURF1   | 0.953143 | 0.898771 | 1.010805 | 0.109298 |
| SLC5A3   | 0.946516 | 0.899345 | 0.996162 | 0.035082 |
| GPATCH3  | 0.961328 | 0.88475  | 1.044535 | 0.351751 |
| CDC42BPE | 0.999318 | 0.947248 | 1.05425  | 0.980054 |
| PLXNB3   | 1.036466 | 0.955827 | 1.123909 | 0.386096 |
| OXCT2    | 1.474883 | 1.312671 | 1.657141 | 6.30E-11 |
| RPL10A   | 0.889851 | 0.820477 | 0.965091 | 0.004833 |
| RCSD1    | 0.966436 | 0.909983 | 1.026391 | 0.266255 |
| FAM169A  | 1.278123 | 1.198374 | 1.363179 | 8.32E-14 |
| ZNF830   | 1.113837 | 1.012575 | 1.225226 | 0.026627 |
| GRIN3A   | 1.118909 | 1.01536  | 1.233018 | 0.023353 |
| CNOT7    | 1.043796 | 0.949524 | 1.147428 | 0.374799 |
| TMEM184I | 0.931485 | 0.857839 | 1.011453 | 0.091224 |
| SCAMP5   | 1.218487 | 1.140247 | 1.302095 | 5.35E-09 |
| ZNF521   | 1.031766 | 1.00467  | 1.059593 | 0.021272 |
| LRIG2    | 0.986194 | 0.912938 | 1.065328 | 0.724076 |
| GK       | 0.980793 | 0.915781 | 1.050419 | 0.579411 |
| FOXJ3    | 0.925275 | 0.854109 | 1.002371 | 0.057175 |
| ZNF358   | 1.129042 | 1.052434 | 1.211227 | 0.00071  |
| SFT2D1   | 1.120269 | 1.009204 | 1.243557 | 0.033011 |
| CD247    | 1.013594 | 0.962582 | 1.067311 | 0.608305 |
| INPP5F   | 1.097178 | 1.011093 | 1.190592 | 0.026109 |
| ARHGAP11 | 1.090308 | 1.020475 | 1.164919 | 0.010464 |
| SUCNR1   | 0.899297 | 0.864361 | 0.935645 | 1.52E-07 |
| HMG2     | 1.185384 | 1.076461 | 1.305329 | 0.000544 |
| UBE2J1   | 0.914677 | 0.84056  | 0.99533  | 0.03859  |
| GJC2     | 0.936346 | 0.872708 | 1.004624 | 0.067026 |
| OPA1     | 0.973465 | 0.90755  | 1.044166 | 0.452168 |
| DENND4B  | 1.03899  | 0.954584 | 1.130859 | 0.376273 |

|          |          |          |          |          |
|----------|----------|----------|----------|----------|
| RYR3     | 1.027699 | 0.972006 | 1.086583 | 0.336474 |
| ZNF277   | 0.843706 | 0.767111 | 0.927949 | 0.000465 |
| KTI12    | 1.08122  | 0.979907 | 1.193008 | 0.119798 |
| TOX      | 0.98609  | 0.934249 | 1.040807 | 0.611185 |
| CES1     | 1.03927  | 1.010047 | 1.069338 | 0.008122 |
| CD3E     | 0.982664 | 0.932501 | 1.035525 | 0.513004 |
| RUSC2    | 1.028051 | 0.979094 | 1.079455 | 0.266451 |
| FICD     | 1.024782 | 0.959559 | 1.094437 | 0.465632 |
| OSTC     | 0.936169 | 0.854382 | 1.025785 | 0.15732  |
| TSEN15   | 1.27983  | 1.151976 | 1.421873 | 4.33E-06 |
| RUNDC1   | 0.995209 | 0.918534 | 1.078285 | 0.906542 |
| CCDC152  | 1.266375 | 1.145406 | 1.40012  | 4.02E-06 |
| GRK5     | 0.929507 | 0.869036 | 0.994187 | 0.033187 |
| TYW1     | 0.937501 | 0.864469 | 1.016703 | 0.118841 |
| SFMBT2   | 0.933036 | 0.881198 | 0.987924 | 0.017476 |
| PNMA5    | 1.033513 | 0.952988 | 1.120842 | 0.425757 |
| ITPRIPL1 | 1.133641 | 1.043734 | 1.231291 | 0.002927 |
| SMC5     | 0.918111 | 0.851276 | 0.990194 | 0.026726 |
| PRMT6    | 1.24478  | 1.149607 | 1.347832 | 6.83E-08 |
| SHISA4   | 1.146918 | 1.083222 | 1.214361 | 2.58E-06 |
| CAPZA2   | 1.055603 | 0.958923 | 1.162031 | 0.269543 |
| TOP1     | 0.953153 | 0.887901 | 1.023201 | 0.184821 |
| PRC1     | 1.034732 | 0.952107 | 1.124526 | 0.421336 |
| MAP3K3   | 0.924528 | 0.857566 | 0.996719 | 0.040791 |
| L1CAM    | 0.838198 | 0.723893 | 0.970551 | 0.018296 |
| SREBF2   | 1.011674 | 0.937024 | 1.092271 | 0.76664  |
| RASGEF1A | 1.086897 | 0.999104 | 1.182405 | 0.052488 |
| RPL39    | 0.875023 | 0.81674  | 0.937466 | 0.000147 |
| DZIP3    | 1.048492 | 0.968475 | 1.13512  | 0.242362 |
| KIAA0753 | 0.981822 | 0.902099 | 1.06859  | 0.671138 |
| DCLRE1A  | 1.115795 | 1.029908 | 1.208845 | 0.007339 |
| ATG9A    | 0.96382  | 0.904074 | 1.027515 | 0.259054 |
| NOS1AP   | 1.21974  | 1.141514 | 1.303326 | 4.26E-09 |
| APRT     | 1.054334 | 0.959313 | 1.158767 | 0.272216 |
| GPRASP1  | 1.001443 | 0.935893 | 1.071584 | 0.966696 |
| TBKBP1   | 0.958454 | 0.89827  | 1.02267  | 0.199676 |
| MAGEE1   | 1.133877 | 1.031029 | 1.246984 | 0.009602 |
| ZFP2     | 1.024723 | 0.912139 | 1.151202 | 0.680873 |
| L3MBTL3  | 1.122774 | 1.048449 | 1.202367 | 0.00092  |
| MFAP3L   | 1.13906  | 1.047573 | 1.238536 | 0.002304 |
| NAGA     | 1.082424 | 1.024562 | 1.143554 | 0.004719 |
| SMG5     | 0.994526 | 0.921763 | 1.073033 | 0.887394 |
| TGM2     | 1.144737 | 1.09197  | 1.200054 | 1.98E-08 |
| ARMCX6   | 1.081499 | 0.973432 | 1.201563 | 0.144664 |
| PJA2     | 0.900481 | 0.841826 | 0.963224 | 0.002286 |
| SGMS1    | 1.061107 | 0.989696 | 1.137671 | 0.095201 |
| OR10Z1   | 1.071754 | 0.996209 | 1.153029 | 0.063153 |
| MIR30E   | 0.99633  | 0.934481 | 1.062273 | 0.910479 |
| MIR429   | 0.943977 | 0.862691 | 1.032923 | 0.209516 |
| MIR345   | 0.960458 | 0.907969 | 1.015981 | 0.159415 |
| MIR16-2  | 1.033755 | 0.98749  | 1.082188 | 0.155296 |
| MIR340   | 0.960459 | 0.918877 | 1.003924 | 0.074011 |
| MIR339   | 1.152647 | 1.092583 | 1.216013 | 1.96E-07 |
| MIRLET7C | 1.020014 | 0.926218 | 1.123307 | 0.68722  |
| MIR425   | 0.987441 | 0.951899 | 1.02431  | 0.499203 |
| MIR210   | 0.996479 | 0.943002 | 1.052987 | 0.900248 |
| MIR324   | 1.029537 | 0.974591 | 1.087582 | 0.298233 |
| MIR101-2 | 1.134625 | 1.019733 | 1.262463 | 0.020412 |

|          |          |          |          |          |
|----------|----------|----------|----------|----------|
| MIR26A1  | 1.141331 | 1.053756 | 1.236184 | 0.001173 |
| MIR342   | 1.1482   | 1.077316 | 1.223748 | 2.13E-05 |
| MIR326   | 1.0269   | 0.979113 | 1.07702  | 0.274931 |
| MIR302C  | 0.998096 | 0.931918 | 1.068973 | 0.956574 |
| MIR26B   | 1.040515 | 0.983949 | 1.100333 | 0.163741 |
| MIR148B  | 1.032292 | 0.967461 | 1.101467 | 0.336876 |
| MIR101-1 | 1.078218 | 1.021575 | 1.138001 | 0.006233 |
| MIR373   | 1.101387 | 1.035649 | 1.171298 | 0.002101 |
| MIR302D  | 0.974995 | 0.907894 | 1.047054 | 0.486381 |
| MIRLET7G | 1.00788  | 0.963493 | 1.054313 | 0.732664 |
| MIR30D   | 1.013878 | 0.948108 | 1.084209 | 0.687125 |
| MIR126   | 0.949059 | 0.902109 | 0.998452 | 0.043403 |
| MIR374A  | 0.987463 | 0.934728 | 1.043173 | 0.652313 |
| MIR367   | 1.013426 | 0.935757 | 1.097542 | 0.743044 |
| MIR331   | 1.00628  | 0.952259 | 1.063366 | 0.824016 |
| MIRLET7I | 1.040791 | 0.978816 | 1.106691 | 0.201815 |
| SNORD114 | 0.958028 | 0.878238 | 1.045068 | 0.333836 |
| SNORD9   | 1.034899 | 0.975316 | 1.098121 | 0.25686  |
| SNORA63  | 1.006373 | 0.920036 | 1.100812 | 0.889595 |
| SNORA31  | 0.994285 | 0.933636 | 1.058874 | 0.858341 |
| SNORD104 | 1.082521 | 1.014799 | 1.154763 | 0.016143 |
| SNORD1B  | 1.078549 | 1.020804 | 1.13956  | 0.007073 |
| VTRNA1-1 | 1.073507 | 1.01897  | 1.130964 | 0.007667 |
| SNORA73I | 1.022803 | 0.996601 | 1.049693 | 0.088599 |
| SNORA70  | 1.080637 | 0.968548 | 1.205698 | 0.165137 |
| SNORA72  | 1.023184 | 0.957727 | 1.093115 | 0.496839 |
| SNORA38I | 1.047455 | 0.988156 | 1.110314 | 0.118938 |
| SNORA33  | 1.003319 | 0.9433   | 1.067157 | 0.91614  |
| RNU4-1   | 1.03142  | 0.997541 | 1.06645  | 0.069449 |
| SNORA38  | 1.015293 | 0.972829 | 1.05961  | 0.486271 |
| SNORD46  | 1.05408  | 1.003558 | 1.107146 | 0.03558  |
| SNORA74I | 0.977323 | 0.933992 | 1.022666 | 0.321525 |
| RNY1     | 1.102334 | 1.037585 | 1.171123 | 0.001607 |
| SNORA62  | 1.053618 | 0.956002 | 1.1612   | 0.292383 |
| SNORA65  | 1.064078 | 1.012378 | 1.118419 | 0.014524 |
| RNU105B  | 0.950812 | 0.902688 | 1.001501 | 0.056991 |
| SNORA16I | 1.008725 | 0.956871 | 1.06339  | 0.746971 |
| SNORA14I | 1.085399 | 1.011753 | 1.164406 | 0.02226  |
| SNORD11K | 0.891518 | 0.815621 | 0.974478 | 0.011424 |
| SNORA5C  | 0.997421 | 0.966376 | 1.029464 | 0.872834 |
| SNORD11J | 0.962877 | 0.920091 | 1.007653 | 0.102844 |
| SNORD48  | 1.013442 | 0.933279 | 1.100491 | 0.750796 |
| SNORD11L | 0.953541 | 0.869078 | 1.046214 | 0.314759 |
| SNORA23  | 1.015974 | 0.988221 | 1.044505 | 0.262084 |
| VTRNA1-2 | 0.971615 | 0.901667 | 1.046989 | 0.450013 |
| SNORD11M | 0.860546 | 0.764603 | 0.968527 | 0.012767 |
| SNORD6   | 0.946496 | 0.899643 | 0.99579  | 0.033768 |
| RNY3     | 1.128222 | 1.065764 | 1.19434  | 3.30E-05 |
| RNU4-2   | 1.028485 | 0.993294 | 1.064924 | 0.113838 |
| MIR146B  | 0.938837 | 0.876293 | 1.005846 | 0.072772 |
| MIR582   | 1.203827 | 1.106523 | 1.309689 | 1.60E-05 |
| ZNF525   | 1.105955 | 1.023955 | 1.194522 | 0.0104   |
| INF2     | 1.063795 | 0.992502 | 1.140208 | 0.080584 |
| EFCAB2   | 0.974249 | 0.902016 | 1.052266 | 0.506845 |
| CHML     | 1.049381 | 0.979046 | 1.124767 | 0.17329  |
| TATDN3   | 1.064686 | 0.956305 | 1.185349 | 0.252498 |
| CR1      | 0.921581 | 0.877779 | 0.967568 | 0.001013 |
| ECT2L    | 1.006467 | 0.927838 | 1.09176  | 0.876568 |

|          |          |          |          |          |
|----------|----------|----------|----------|----------|
| GPR52    | 1.032344 | 0.980261 | 1.087195 | 0.22814  |
| FCGR3A   | 1.001246 | 0.958159 | 1.04627  | 0.955763 |
| OR6K3    | 1.081742 | 0.927117 | 1.262154 | 0.318091 |
| MSTO2P   | 1.062374 | 0.984624 | 1.146263 | 0.118673 |
| SPRN     | 1.129171 | 1.000342 | 1.274591 | 0.049357 |
| FANK1    | 0.847645 | 0.748635 | 0.95975  | 0.009102 |
| DDO      | 0.937006 | 0.886988 | 0.989845 | 0.020092 |
| SNHG5    | 0.827684 | 0.763337 | 0.897456 | 4.65E-06 |
| GDI1     | 1.059874 | 0.952452 | 1.179411 | 0.286197 |
| PCMTD2   | 1.106485 | 1.022923 | 1.196875 | 0.011549 |
| SOX18    | 0.931564 | 0.845112 | 1.026861 | 0.153709 |
| LIME1    | 1.119062 | 1.005298 | 1.245699 | 0.039727 |
| SAMD13   | 1.090766 | 0.985551 | 1.207213 | 0.093204 |
| EFCAB7   | 1.092998 | 0.979658 | 1.219451 | 0.111378 |
| LCN8     | 0.741903 | 0.644339 | 0.85424  | 3.32E-05 |
| LIPN     | 0.873202 | 0.800014 | 0.953086 | 0.002399 |
| FOXO6    | 1.044892 | 0.947831 | 1.151893 | 0.377331 |
| SYS1     | 1.065585 | 0.97546  | 1.164036 | 0.158866 |
| INPP5B   | 1.042316 | 0.968822 | 1.121385 | 0.266597 |
| RPA4     | 0.974162 | 0.902637 | 1.051354 | 0.501056 |
| NEU4     | 0.981184 | 0.945282 | 1.018449 | 0.317914 |
| MAFB     | 1.045022 | 1.009616 | 1.081669 | 0.012274 |
| TRAF3IP1 | 1.194051 | 1.073775 | 1.327799 | 0.00106  |
| BMP2KL   | 0.993301 | 0.928879 | 1.062191 | 0.844244 |
| CHIC1    | 1.318907 | 1.224454 | 1.420646 | 2.86E-13 |
| GIGYF2   | 1.007704 | 0.934143 | 1.087058 | 0.8427   |
| RUFY2    | 0.987966 | 0.913644 | 1.068333 | 0.761568 |
| NHSL2    | 1.139496 | 1.082975 | 1.198968 | 4.88E-07 |
| GGTA1    | 0.859367 | 0.800329 | 0.922759 | 3.00E-05 |
| PHACTR4  | 1.001192 | 0.920137 | 1.089387 | 0.977942 |
| AGAP6    | 0.956368 | 0.864806 | 1.057624 | 0.384925 |
| TIMM23B  | 1.00168  | 0.912084 | 1.100078 | 0.971988 |
| ZDHHC18  | 0.987114 | 0.925193 | 1.053179 | 0.694762 |
| ZDBF2    | 1.054551 | 0.985503 | 1.128436 | 0.124217 |
| GGNBP1   | 1.101839 | 1.00303  | 1.210381 | 0.043066 |
| DAXX     | 1.135151 | 1.02161  | 1.261311 | 0.018394 |
| BMPR2    | 1.104685 | 1.047177 | 1.165351 | 0.000262 |
| TCEA3    | 0.998535 | 0.880634 | 1.132222 | 0.981759 |
| PFDN6    | 1.054296 | 0.941843 | 1.180175 | 0.358209 |
| RING1    | 1.076663 | 0.968342 | 1.1971   | 0.172147 |
| HSD17B8  | 1.046655 | 0.954348 | 1.147891 | 0.333036 |
| RXRB     | 1.083166 | 0.997541 | 1.176141 | 0.057253 |
| COL11A2  | 1.220145 | 1.096427 | 1.357823 | 0.000265 |
| HLA-DOA  | 0.955021 | 0.913967 | 0.99792  | 0.040088 |
| BRD2     | 0.918046 | 0.843706 | 0.998936 | 0.04718  |
| HLA-DMA  | 0.971862 | 0.922598 | 1.023758 | 0.282233 |
| COL5A2   | 1.135133 | 0.988922 | 1.302961 | 0.071606 |
| PSMB8    | 1.2481   | 1.129151 | 1.379581 | 1.44E-05 |
| TAP2     | 1.102881 | 1.020526 | 1.191882 | 0.013394 |
| SPIN3    | 1.09194  | 0.958525 | 1.243924 | 0.185878 |
| HLA-DRA  | 0.984283 | 0.946711 | 1.023346 | 0.424991 |
| NOTCH4   | 0.991227 | 0.905824 | 1.084682 | 0.847992 |
| PBX2     | 0.912933 | 0.84943  | 0.981183 | 0.013273 |
| AGER     | 1.02414  | 0.946418 | 1.108244 | 0.553612 |
| RNF5     | 1.075647 | 0.974309 | 1.187525 | 0.148616 |
| AGPAT1   | 1.084031 | 0.990182 | 1.186776 | 0.08074  |
| PRRT1    | 1.12815  | 0.949262 | 1.34075  | 0.171048 |
| FKBPL    | 1.012067 | 0.93337  | 1.097398 | 0.771497 |

|          |          |          |          |          |
|----------|----------|----------|----------|----------|
| MRPL38   | 1.226932 | 1.106828 | 1.360069 | 9.98E-05 |
| STK19    | 0.969514 | 0.857031 | 1.096759 | 0.622671 |
| SKIV2L   | 1.072273 | 0.988376 | 1.163292 | 0.093212 |
| ZBTB12   | 0.997587 | 0.93127  | 1.068626 | 0.94512  |
| SDHD     | 1.060379 | 0.967189 | 1.162547 | 0.211613 |
| EHMT2    | 1.02482  | 0.942805 | 1.113968 | 0.564563 |
| LAYN     | 1.099835 | 0.999586 | 1.210139 | 0.051002 |
| SLC44A4  | 1.049222 | 0.965746 | 1.139913 | 0.25598  |
| NEU1     | 0.932275 | 0.857226 | 1.013895 | 0.101481 |
| HSPA1B   | 1.022529 | 0.986072 | 1.060334 | 0.229067 |
| HSPA1A   | 1.021715 | 0.982277 | 1.062736 | 0.284794 |
| HSPA1L   | 1.025406 | 0.940277 | 1.118242 | 0.570467 |
| LSM2     | 0.990013 | 0.906532 | 1.081181 | 0.823288 |
| CARD16   | 1.056429 | 0.978703 | 1.140328 | 0.159171 |
| MBD5     | 1.04488  | 0.957866 | 1.139798 | 0.322363 |
| MSH5     | 1.116255 | 1.019204 | 1.222547 | 0.017795 |
| LY6G6C   | 0.950734 | 0.903838 | 1.000063 | 0.050285 |
| LY6G6F   | 1.109567 | 0.995736 | 1.23641  | 0.059756 |
| LY6G5C   | 1.138312 | 1.036562 | 1.250051 | 0.006696 |
| CSNK2B   | 1.153144 | 1.003924 | 1.324543 | 0.043868 |
| APOM     | 0.988711 | 0.898876 | 1.087524 | 0.815294 |
| AIF1     | 1.090472 | 1.026049 | 1.158941 | 0.00531  |
| NCR3     | 1.230899 | 1.138507 | 1.330789 | 1.81E-07 |
| LST1     | 1.112256 | 1.058414 | 1.168837 | 2.64E-05 |
| NFKBIL1  | 1.067076 | 0.949812 | 1.198817 | 0.274375 |
| MCCD1    | 1.025545 | 0.957353 | 1.098595 | 0.472443 |
| MICB     | 0.943716 | 0.859684 | 1.035961 | 0.223422 |
| ZNF551   | 0.997928 | 0.935926 | 1.064037 | 0.949459 |
| MICA     | 0.972791 | 0.887023 | 1.066851 | 0.558007 |
| ZNF805   | 1.030348 | 0.95574  | 1.110781 | 0.435649 |
| HLA-C    | 0.939034 | 0.866451 | 1.017697 | 0.12538  |
| PSORS1C3 | 1.131406 | 1.019669 | 1.255387 | 0.019959 |
| POU5F1   | 1.479615 | 1.284769 | 1.704012 | 5.38E-08 |
| CCHCR1   | 1.105114 | 1.011395 | 1.207518 | 0.027067 |
| DHX16    | 1.004799 | 0.913819 | 1.104836 | 0.92125  |
| MRPS18B  | 1.076012 | 0.981047 | 1.18017  | 0.120169 |
| PPP1R10  | 0.993905 | 0.936952 | 1.054319 | 0.839084 |
| ABCF1    | 1.005327 | 0.915363 | 1.104133 | 0.911553 |
| PRR3     | 1.125888 | 1.012965 | 1.251401 | 0.027889 |
| LILRB3   | 1.026396 | 0.973754 | 1.081884 | 0.332104 |
| DDR1     | 0.891275 | 0.810991 | 0.979506 | 0.016853 |
| GNL1     | 0.902411 | 0.837911 | 0.971875 | 0.006648 |
| HLA-E    | 1.023396 | 0.936807 | 1.117988 | 0.608147 |
| TRIM39   | 1.024861 | 0.935215 | 1.123099 | 0.599022 |
| ZNF468   | 1.022773 | 0.945357 | 1.106528 | 0.574994 |
| TRIM15   | 1.114189 | 1.030426 | 1.204761 | 0.006696 |
| ZNF616   | 1.090733 | 1.0041   | 1.184841 | 0.039699 |
| TRIM10   | 1.010907 | 0.971663 | 1.051737 | 0.591264 |
| RNF39    | 1.003289 | 0.926065 | 1.086953 | 0.935957 |
| PPP1R11  | 1.092503 | 0.980717 | 1.217031 | 0.108184 |
| HCG9     | 1.088875 | 0.987572 | 1.200569 | 0.08746  |
| HLA-G    | 0.985829 | 0.87919  | 1.105403 | 0.806964 |
| TBC1D8   | 1.040124 | 0.983323 | 1.100206 | 0.169747 |
| HLA-F    | 1.119763 | 1.053986 | 1.189645 | 0.00025  |
| ZFP57    | 1.011219 | 0.962303 | 1.062621 | 0.659206 |
| CBY3     | 1.103395 | 0.986946 | 1.233584 | 0.083801 |
| IL31     | 0.971103 | 0.887474 | 1.062613 | 0.523348 |
| AKT1S1   | 0.900343 | 0.8023   | 1.010366 | 0.074318 |

|          |          |          |          |          |
|----------|----------|----------|----------|----------|
| GABBR1   | 1.140023 | 1.093589 | 1.188429 | 6.54E-10 |
| SPDYC    | 1.061421 | 0.976763 | 1.153418 | 0.159853 |
| TRIM27   | 1.041872 | 0.961786 | 1.128627 | 0.314811 |
| RANBP17  | 1.06999  | 0.993021 | 1.152925 | 0.075718 |
| TTC25    | 0.956808 | 0.908976 | 1.007156 | 0.09152  |
| ATXN2    | 0.976051 | 0.893635 | 1.066067 | 0.590182 |
| DCTN1    | 1.020391 | 0.935817 | 1.112609 | 0.647477 |
| TCTN1    | 1.054523 | 0.948793 | 1.172035 | 0.324699 |
| ZBTB48   | 1.048553 | 0.963789 | 1.140773 | 0.270297 |
| NAT8B    | 0.871557 | 0.782784 | 0.970397 | 0.012134 |
| ZNF155   | 1.078766 | 0.978138 | 1.189745 | 0.129131 |
| FBXO48   | 1.004439 | 0.901539 | 1.119083 | 0.935987 |
| CD177    | 1.028069 | 0.994051 | 1.063252 | 0.106869 |
| ZNF783   | 1.039716 | 0.962102 | 1.123591 | 0.325151 |
| ZNF425   | 0.976151 | 0.859819 | 1.108221 | 0.709273 |
| TRIM13   | 0.956561 | 0.868459 | 1.0536   | 0.367669 |
| SPIRE2   | 1.081868 | 0.943284 | 1.240813 | 0.260537 |
| PKHD1L1  | 1.208932 | 1.090115 | 1.340699 | 0.000325 |
| SLFN12L  | 1.150476 | 1.026984 | 1.288818 | 0.01554  |
| SLC35B4  | 1.155219 | 1.074301 | 1.242232 | 9.85E-05 |
| SYCE1L   | 0.96155  | 0.876256 | 1.055146 | 0.408057 |
| TMEM231  | 1.446552 | 1.29599  | 1.614605 | 4.59E-11 |
| FAM71F2  | 1.041887 | 0.977619 | 1.110381 | 0.206532 |
| CCNI2    | 1.171653 | 0.983194 | 1.396235 | 0.076638 |
| CDKL4    | 1.039486 | 0.944732 | 1.143744 | 0.427127 |
| SDHAF1   | 1.090211 | 0.995833 | 1.193533 | 0.061543 |
| PSENE1   | 1.018642 | 0.930308 | 1.115364 | 0.689829 |
| ZBTB10   | 0.89616  | 0.847828 | 0.947247 | 0.000106 |
| CCDC144A | 1.120501 | 1.07301  | 1.170093 | 2.62E-07 |
| LGR4     | 1.092266 | 1.038576 | 1.148732 | 0.0006   |
| PSMB10   | 1.085828 | 0.978834 | 1.204518 | 0.119765 |
| E2F4     | 1.150065 | 1.033296 | 1.280029 | 0.01048  |
| PDE7A    | 1.085252 | 1.021959 | 1.152464 | 0.00762  |
| TMEM170A | 0.996677 | 0.943028 | 1.053378 | 0.906146 |
| SNX2     | 0.97902  | 0.886152 | 1.08162  | 0.676686 |
| NT5M     | 1.047587 | 0.978244 | 1.121846 | 0.183367 |
| IPO7     | 0.978595 | 0.912373 | 1.049624 | 0.545025 |
| PRR13    | 1.132315 | 1.007856 | 1.272142 | 0.036466 |
| TECPR1   | 1.050773 | 0.969603 | 1.138738 | 0.227276 |
| MT1H     | 1.080336 | 1.00468  | 1.16169  | 0.036979 |
| MT1M     | 1.161317 | 1.057558 | 1.275255 | 0.001737 |
| SAMD9    | 1.072553 | 1.009656 | 1.139367 | 0.023108 |
| ATP6AP1L | 1.087462 | 0.966907 | 1.223047 | 0.16193  |
| C2CD4B   | 0.963182 | 0.913265 | 1.015828 | 0.167097 |
| NAP1L4   | 0.996305 | 0.932367 | 1.064628 | 0.912903 |
| TMSB4X   | 0.853959 | 0.786219 | 0.927536 | 0.000181 |
| CPT1B    | 1.332727 | 1.16786  | 1.520869 | 2.02E-05 |
| SMN2     | 0.949729 | 0.867865 | 1.039316 | 0.26208  |
| SERF1B   | 0.952919 | 0.834948 | 1.087558 | 0.47449  |
| HMG1     | 0.956791 | 0.867918 | 1.054764 | 0.374522 |
| STAG3L1  | 0.921451 | 0.840448 | 1.010261 | 0.081418 |
| MUC19    | 1.056096 | 0.948318 | 1.176124 | 0.320337 |
| EIF3CL   | 0.940346 | 0.859276 | 1.029064 | 0.181176 |
| LCMT1    | 0.934246 | 0.839023 | 1.040277 | 0.214958 |
| MFSD2B   | 0.984538 | 0.932693 | 1.039264 | 0.572345 |
| LIN52    | 1.103303 | 1.013882 | 1.200611 | 0.022628 |
| DPF3     | 1.220792 | 1.1297   | 1.319229 | 4.60E-07 |
| ITSN1    | 0.972989 | 0.886976 | 1.067343 | 0.562009 |

|          |          |          |          |          |
|----------|----------|----------|----------|----------|
| ITPRIPL2 | 0.981126 | 0.926613 | 1.038847 | 0.513576 |
| DENND1C  | 0.978155 | 0.892859 | 1.0716   | 0.635177 |
| CRLF2    | 1.01328  | 0.96869  | 1.059921 | 0.565594 |
| CRYZL1   | 0.977162 | 0.889873 | 1.073014 | 0.628458 |
| RP9P     | 1.017229 | 0.938227 | 1.102883 | 0.678775 |
| CATSPER2 | 0.949502 | 0.896074 | 1.006115 | 0.079492 |
| ARRDC5   | 0.997724 | 0.931112 | 1.069101 | 0.94846  |
| LOH12CR2 | 1.134065 | 0.979965 | 1.312396 | 0.091341 |
| KLRC2    | 1.077216 | 0.99351  | 1.167975 | 0.071513 |
| KLRC3    | 1.054733 | 0.956256 | 1.163351 | 0.286628 |
| RFPL3S   | 0.987522 | 0.918418 | 1.061826 | 0.734439 |
| OLIG2    | 0.933316 | 0.858355 | 1.014825 | 0.106208 |
| RNPS1    | 0.950987 | 0.856908 | 1.055394 | 0.34437  |
| HSP90AB2 | 1.102379 | 0.981207 | 1.238516 | 0.100875 |
| NYNRIN   | 1.20096  | 1.146792 | 1.257686 | 7.45E-15 |
| DNAJC19  | 1.045844 | 0.929028 | 1.177347 | 0.458237 |
| IFITM5   | 1.116579 | 1.050598 | 1.186703 | 0.000388 |
| DEFA1    | 1.072222 | 1.00436  | 1.144669 | 0.036583 |
| DOK6     | 1.170422 | 1.094149 | 1.252011 | 4.72E-06 |
| ZDHHC11I | 0.928096 | 0.852258 | 1.010683 | 0.086228 |
| TMEM191I | 1.487779 | 1.203784 | 1.838775 | 0.000237 |
| HBA1     | 0.982538 | 0.957262 | 1.008482 | 0.185244 |
| HBM      | 0.986935 | 0.958423 | 1.016295 | 0.379247 |
| ATP10A   | 1.066067 | 1.010545 | 1.124638 | 0.019059 |
| HCP5     | 1.073191 | 1.01539  | 1.134281 | 0.012396 |
| HLA-H    | 1.027926 | 0.952365 | 1.109481 | 0.479539 |
| HCG27    | 1.006066 | 0.945706 | 1.070278 | 0.84807  |
| COL6A6   | 1.125932 | 1.076664 | 1.177455 | 2.04E-07 |
| RAB12    | 0.997981 | 0.931901 | 1.068747 | 0.953889 |
| HLA-A    | 1.007085 | 0.923393 | 1.098363 | 0.873274 |
| LNP1     | 0.964243 | 0.871364 | 1.067023 | 0.481052 |
| VGLL3    | 1.115044 | 0.983456 | 1.264238 | 0.089207 |
| TRIM71   | 0.871095 | 0.834054 | 0.909781 | 4.82E-10 |
| ANKRD28  | 0.968722 | 0.911308 | 1.029754 | 0.308014 |
| COLQ     | 1.171784 | 1.07424  | 1.278186 | 0.00035  |
| METTL6   | 1.248597 | 1.138074 | 1.369853 | 2.67E-06 |
| SNORA2A  | 0.991063 | 0.94332  | 1.041223 | 0.721572 |
| SNORA69  | 1.034909 | 0.952832 | 1.124056 | 0.415701 |
| RNU6-1   | 1.076222 | 1.013441 | 1.142893 | 0.016606 |
| SNORA22  | 1.073251 | 1.008649 | 1.141991 | 0.025626 |
| SNORD10I | 0.970535 | 0.933508 | 1.009031 | 0.131825 |
| SNORA30  | 1.012186 | 0.966058 | 1.060518 | 0.610774 |
| SNORD37  | 0.987858 | 0.941585 | 1.036404 | 0.6177   |
| SNORA5A  | 1.003052 | 0.965199 | 1.04239  | 0.876605 |
| SNORA75  | 1.094635 | 1.015496 | 1.179942 | 0.018197 |
| SNORA70I | 0.988351 | 0.936959 | 1.042561 | 0.667129 |
| SNORD15I | 1.083713 | 0.995453 | 1.179798 | 0.063621 |
| SNORD63  | 1.009172 | 0.918656 | 1.108606 | 0.848976 |
| SNORA54  | 0.987297 | 0.948818 | 1.027337 | 0.52851  |
| SNORA36I | 1.018701 | 0.94994  | 1.092438 | 0.603319 |
| SNORD59I | 0.982894 | 0.933425 | 1.034985 | 0.51257  |
| SNORD51  | 1.105726 | 1.011355 | 1.208902 | 0.027242 |
| SNORA7B  | 1.062002 | 1.003667 | 1.123728 | 0.036893 |
| SNORA15  | 1.04283  | 0.945562 | 1.150105 | 0.401195 |
| SNORA14I | 1.010457 | 0.967628 | 1.055181 | 0.637812 |
| SNORA37  | 1.024415 | 0.974548 | 1.076834 | 0.343438 |
| SNORA2B  | 1.001072 | 0.946841 | 1.058409 | 0.969918 |
| SNORA20  | 1.115723 | 1.039423 | 1.197623 | 0.002447 |

|          |          |          |          |          |
|----------|----------|----------|----------|----------|
| SNORD56I | 0.983483 | 0.946729 | 1.021664 | 0.391412 |
| SNORD15I | 1.013179 | 0.964741 | 1.06405  | 0.600387 |
| SNORA19  | 0.996302 | 0.945868 | 1.049424 | 0.888822 |
| SNORA46  | 1.014761 | 0.967167 | 1.064698 | 0.549933 |
| RNU1-3   | 0.935354 | 0.876165 | 0.998542 | 0.0451   |
| SNORA66  | 1.013213 | 0.948819 | 1.081977 | 0.695198 |
| MIR25    | 1.065813 | 1.00441  | 1.13097  | 0.035264 |
| MIR647   | 0.94273  | 0.881489 | 1.008226 | 0.085266 |
| MIR635   | 1.013379 | 0.967437 | 1.061502 | 0.5745   |
| MIR23B   | 1.057732 | 0.980675 | 1.140843 | 0.145857 |
| MIR199B  | 0.969088 | 0.912696 | 1.028963 | 0.304639 |
| MIR30B   | 1.085865 | 1.006996 | 1.170911 | 0.03226  |
| MIR606   | 0.97642  | 0.941021 | 1.01315  | 0.205319 |
| MIR593   | 0.987423 | 0.94567  | 1.031019 | 0.565844 |
| MIR215   | 1.057631 | 1.000494 | 1.118032 | 0.047998 |
| MIR181A2 | 1.0373   | 0.988317 | 1.088711 | 0.137863 |
| MIR191   | 1.002574 | 0.961718 | 1.045166 | 0.903608 |
| MIR554   | 1.043917 | 1.000692 | 1.089009 | 0.046366 |
| MIR200A  | 1.001361 | 0.914048 | 1.097014 | 0.976692 |
| MIR491   | 0.984211 | 0.935924 | 1.03499  | 0.535231 |
| MIR149   | 1.063957 | 0.977797 | 1.157708 | 0.150195 |
| MIR604   | 1.015729 | 0.976172 | 1.056889 | 0.441276 |
| MIR181C  | 0.951908 | 0.855047 | 1.059741 | 0.368017 |
| MIR193A  | 1.088753 | 0.99597  | 1.19018  | 0.06133  |
| MIR194-1 | 1.058929 | 1.001766 | 1.119354 | 0.043149 |
| MIR128-2 | 0.922182 | 0.831577 | 1.02266  | 0.124707 |
| MIR562   | 1.043845 | 0.987673 | 1.103212 | 0.128394 |
| MIR581   | 1.023532 | 0.971706 | 1.078123 | 0.380306 |
| MIR651   | 0.906956 | 0.823489 | 0.998882 | 0.047403 |
| MIR641   | 0.996959 | 0.956333 | 1.039311 | 0.885912 |
| MIR505   | 0.996697 | 0.954946 | 1.040274 | 0.879556 |
| MIR99A   | 0.97625  | 0.863886 | 1.10323  | 0.700037 |
| MIR571   | 0.997712 | 0.956197 | 1.041029 | 0.915864 |
| MIR570   | 1.010068 | 0.952387 | 1.071243 | 0.738446 |
| MIR558   | 0.942639 | 0.900092 | 0.987197 | 0.012184 |
| MIR128-1 | 1.013576 | 0.954564 | 1.076237 | 0.659497 |
| MIR602   | 0.974417 | 0.90521  | 1.048916 | 0.490539 |
| MIR184   | 1.220762 | 1.08386  | 1.374956 | 0.001013 |
| MIR659   | 1.100746 | 1.027457 | 1.179262 | 0.006324 |
| MIR573   | 0.996815 | 0.951555 | 1.044229 | 0.892981 |
| MIR32    | 0.975263 | 0.931275 | 1.021329 | 0.287465 |
| MIR597   | 0.995138 | 0.949171 | 1.04333  | 0.839913 |
| MIR141   | 0.930237 | 0.834363 | 1.037127 | 0.192547 |
| MIR627   | 0.987018 | 0.916393 | 1.063085 | 0.730118 |
| MIR200C  | 1.026354 | 0.955634 | 1.102309 | 0.475143 |
| MIR572   | 0.988446 | 0.901923 | 1.083269 | 0.803633 |
| MIR623   | 0.98565  | 0.946093 | 1.026862 | 0.489196 |
| MIR186   | 1.026256 | 0.976496 | 1.078552 | 0.306772 |
| MIR222   | 0.911125 | 0.869125 | 0.955155 | 0.000111 |
| MIR556   | 1.21193  | 1.141028 | 1.287238 | 4.12E-10 |
| MIR200B  | 1.020739 | 0.933335 | 1.116329 | 0.653117 |
| MIR657   | 1.084434 | 1.016103 | 1.157359 | 0.014645 |
| MIR181B2 | 1.026505 | 0.979664 | 1.075587 | 0.272301 |
| MIR590   | 0.973729 | 0.927146 | 1.022652 | 0.28714  |
| MIR575   | 1.045014 | 0.97309  | 1.122254 | 0.226207 |
| MIR553   | 1.020402 | 0.974396 | 1.06858  | 0.390871 |
| MIR199A1 | 0.99743  | 0.957877 | 1.038617 | 0.900812 |
| MIR580   | 1.079659 | 1.014398 | 1.149118 | 0.015981 |



|           |          |          |          |          |
|-----------|----------|----------|----------|----------|
| MIR93     | 1.043896 | 0.992532 | 1.097918 | 0.09516  |
| MIR181A1  | 0.945462 | 0.900069 | 0.993143 | 0.02548  |
| MIR617    | 1.019428 | 0.965992 | 1.075821 | 0.483642 |
| MIR626    | 0.966889 | 0.916087 | 1.020507 | 0.221414 |
| MIR586    | 1.083282 | 1.021717 | 1.148556 | 0.00737  |
| MIR551A   | 0.964539 | 0.905721 | 1.027176 | 0.260712 |
| MIR15B    | 1.024354 | 0.979127 | 1.071669 | 0.296306 |
| MIR648    | 0.962573 | 0.91893  | 1.008289 | 0.107118 |
| MIR26A2   | 1.000583 | 0.94982  | 1.054058 | 0.98251  |
| MIR646    | 1.015714 | 0.971837 | 1.061572 | 0.488929 |
| MIR599    | 1.038554 | 0.980797 | 1.099712 | 0.19505  |
| MIR563    | 1.046864 | 0.98184  | 1.116195 | 0.161571 |
| MIR545    | 1.009548 | 0.958044 | 1.063822 | 0.722072 |
| MIR640    | 0.99589  | 0.963488 | 1.029383 | 0.807225 |
| MIR596    | 1.01729  | 0.931245 | 1.111285 | 0.703815 |
| MIR33B    | 1.012159 | 0.960466 | 1.066633 | 0.65138  |
| MIR27B    | 1.117033 | 1.042813 | 1.196535 | 0.001605 |
| MIR221    | 0.911651 | 0.874932 | 0.949911 | 1.03E-05 |
| MIR610    | 0.983405 | 0.902373 | 1.071714 | 0.7029   |
| MIR302A   | 1.013051 | 0.944275 | 1.086836 | 0.717735 |
| MIR603    | 1.192201 | 1.101609 | 1.290244 | 1.30E-05 |
| MIR33A    | 0.991229 | 0.947277 | 1.03722  | 0.703405 |
| MIR634    | 1.043296 | 0.973618 | 1.117961 | 0.229426 |
| MIR574    | 0.962724 | 0.902111 | 1.027409 | 0.25222  |
| MIR624    | 1.03043  | 0.987371 | 1.075367 | 0.168701 |
| MIR579    | 0.97115  | 0.924594 | 1.020049 | 0.24282  |
| MIR30C1   | 1.036597 | 0.972134 | 1.105334 | 0.272544 |
| MIR569    | 1.000578 | 0.945679 | 1.058665 | 0.983977 |
| MIR629    | 1.040387 | 1.001945 | 1.080305 | 0.039293 |
| MIR620    | 0.999071 | 0.959217 | 1.040581 | 0.9643   |
| MIR638    | 0.975757 | 0.918154 | 1.036974 | 0.429233 |
| MIR589    | 0.982176 | 0.930653 | 1.036551 | 0.512991 |
| MIR181B1  | 0.964254 | 0.927819 | 1.00212  | 0.063995 |
| MIR607    | 0.947224 | 0.868908 | 1.032599 | 0.218168 |
| MIR613    | 1.009409 | 0.947872 | 1.07494  | 0.770437 |
| MIR576    | 0.960194 | 0.922268 | 0.999681 | 0.048213 |
| MIR182    | 1.042601 | 0.947512 | 1.147233 | 0.392556 |
| MIR601    | 1.008257 | 0.964801 | 1.05367  | 0.714494 |
| MIR301A   | 1.180677 | 1.101901 | 1.265086 | 2.43E-06 |
| MIR643    | 0.989767 | 0.942498 | 1.039407 | 0.680373 |
| MIR16-1   | 1.084218 | 1.013402 | 1.159982 | 0.018963 |
| MIR130A   | 1.023689 | 0.968978 | 1.081489 | 0.40346  |
| MIRLET7F2 | 1.038906 | 0.968483 | 1.11445  | 0.286534 |
| MIR652    | 1.029167 | 0.979834 | 1.080983 | 0.251336 |
| MIR140    | 1.044864 | 0.979508 | 1.114582 | 0.182958 |
| MIR645    | 0.998456 | 0.957998 | 1.040623 | 0.941645 |
| MIR618    | 1.030853 | 0.988428 | 1.0751   | 0.15644  |
| MIR185    | 1.055366 | 1.003999 | 1.109362 | 0.034284 |
| MIR591    | 1.003099 | 0.956983 | 1.051437 | 0.897487 |
| MIR616    | 0.941572 | 0.898436 | 0.986778 | 0.011861 |
| MIR548A3  | 0.96233  | 0.91279  | 1.014559 | 0.154464 |
| MIR106B   | 1.031377 | 0.982169 | 1.083051 | 0.215482 |
| MIR320A   | 0.977727 | 0.934513 | 1.02294  | 0.328772 |
| SNORD94   | 0.983577 | 0.932654 | 1.037279 | 0.541505 |
| SNORD96I  | 1.071308 | 1.017278 | 1.128207 | 0.009087 |
| SNORA49   | 1.024076 | 0.980056 | 1.070074 | 0.288555 |
| SNORD120  | 1.004189 | 0.965604 | 1.044315 | 0.83438  |
| SNORD83   | 0.975292 | 0.931247 | 1.02142  | 0.288652 |

|          |          |          |          |          |
|----------|----------|----------|----------|----------|
| SNORD101 | 1.13823  | 1.064552 | 1.217007 | 0.000149 |
| SNORD41  | 1.023575 | 0.952848 | 1.099552 | 0.523576 |
| MIR196A1 | 1.085792 | 0.998047 | 1.18125  | 0.055556 |
| GPX3     | 0.953672 | 0.897428 | 1.013441 | 0.126145 |
| GNRHR2   | 1.044402 | 0.94335  | 1.156278 | 0.402736 |
| DIO1     | 1.039402 | 0.94897  | 1.138452 | 0.405331 |
| AKR7L    | 1.116667 | 1.030497 | 1.210043 | 0.007078 |
| STK38L   | 0.903848 | 0.834141 | 0.979381 | 0.013558 |
| SACM1L   | 1.058445 | 0.986712 | 1.135392 | 0.112657 |
| TSN      | 1.081282 | 0.984538 | 1.187532 | 0.102232 |
| MIR454   | 1.190721 | 1.10032  | 1.288549 | 1.47E-05 |
| MIR760   | 1.027483 | 0.971434 | 1.086766 | 0.343478 |
| MIR766   | 0.937263 | 0.894551 | 0.982014 | 0.006476 |
| MIR769   | 1.088511 | 1.005805 | 1.178017 | 0.03542  |
| MIR765   | 1.094187 | 1.025539 | 1.167432 | 0.006473 |
| SLC48A1  | 1.1702   | 1.07874  | 1.269414 | 0.000153 |
| MIR301B  | 1.121381 | 1.038004 | 1.211455 | 0.003659 |
| PRR22    | 1.124371 | 0.998335 | 1.266319 | 0.0533   |
| TAS2R19  | 1.000681 | 0.947516 | 1.056828 | 0.980515 |
| TAS2R50  | 0.999157 | 0.929801 | 1.073686 | 0.981659 |
| TAS2R14  | 1.031345 | 0.958062 | 1.110234 | 0.411808 |
| TAS2R13  | 1.030015 | 0.950026 | 1.116738 | 0.473367 |
| SNORD67  | 1.030838 | 0.976822 | 1.087842 | 0.268723 |
| SNORD66  | 1.032538 | 0.972363 | 1.096437 | 0.295947 |
| SNORD91  | 1.159254 | 1.08551  | 1.238009 | 1.05E-05 |
| SNORD17  | 1.013278 | 0.98159  | 1.045989 | 0.415809 |
| SNORD89  | 1.043393 | 0.973822 | 1.117936 | 0.227619 |
| SNORD72  | 1.028157 | 0.974195 | 1.085108 | 0.312736 |
| SNORA74  | 1.025179 | 0.997626 | 1.053493 | 0.073615 |
| SNORA53  | 1.012369 | 0.989194 | 1.036087 | 0.29814  |
| SNORD90  | 1.034108 | 0.964618 | 1.108604 | 0.344662 |
| SNORD69  | 1.113328 | 1.045676 | 1.185356 | 0.00079  |
| SNORA12  | 1.042084 | 1.010903 | 1.074227 | 0.007824 |
| SNORD19  | 1.024877 | 0.978467 | 1.073488 | 0.298675 |
| SNORD70  | 1.014423 | 0.974729 | 1.055734 | 0.481963 |
| SNORD30  | 1.049258 | 0.965696 | 1.140051 | 0.25613  |
| RNF208   | 1.078769 | 0.989517 | 1.176071 | 0.085289 |
| PTTG3P   | 0.958444 | 0.902961 | 1.017335 | 0.162994 |
| ZNF580   | 0.915928 | 0.832801 | 1.007352 | 0.070442 |
| ZNF611   | 1.11602  | 1.027171 | 1.212555 | 0.009505 |
| NUP62    | 1.20933  | 1.105186 | 1.323287 | 3.52E-05 |
| DENND1B  | 0.96003  | 0.900464 | 1.023538 | 0.211994 |
| SFT2D2   | 0.971066 | 0.910268 | 1.035925 | 0.373446 |
| LPAL2    | 1.120247 | 1.03431  | 1.213324 | 0.005297 |
| ZNF254   | 0.968566 | 0.906829 | 1.034505 | 0.341878 |
| TCTEX1D2 | 1.223607 | 1.080332 | 1.385883 | 0.001493 |
| CRYGS    | 1.173513 | 1.06276  | 1.295807 | 0.001559 |
| CRIP1    | 1.131049 | 1.059879 | 1.206997 | 0.000204 |
| KLHL23   | 1.010284 | 0.945424 | 1.079593 | 0.762485 |
| FAM24B   | 0.95949  | 0.896883 | 1.026466 | 0.229673 |
| TRIM59   | 1.148668 | 1.051946 | 1.254284 | 0.002013 |
| MLLT11   | 0.991941 | 0.923589 | 1.065352 | 0.824213 |
| GIMAP1   | 1.091203 | 0.994978 | 1.196735 | 0.063873 |
| DNLZ     | 0.970405 | 0.881448 | 1.068339 | 0.540268 |
| SUPT4H1  | 0.933206 | 0.821718 | 1.059821 | 0.286905 |
| NRAS     | 0.944634 | 0.874397 | 1.020513 | 0.148497 |
| LTC4S    | 0.99379  | 0.945629 | 1.044405 | 0.805862 |
| ANKRD39  | 1.284156 | 1.137776 | 1.449369 | 5.12E-05 |

|          |          |          |          |          |
|----------|----------|----------|----------|----------|
| QTRT1    | 1.253232 | 1.137817 | 1.380355 | 4.67E-06 |
| CHUK     | 0.986927 | 0.909817 | 1.070573 | 0.751228 |
| MXD3     | 1.160864 | 1.064715 | 1.265695 | 0.000721 |
| GSTM2    | 1.079441 | 1.009374 | 1.154372 | 0.025586 |
| COG8     | 1.027987 | 0.939885 | 1.124347 | 0.545986 |
| ARHGAP15 | 1.048525 | 0.969036 | 1.134535 | 0.238792 |
| LCAT     | 1.122716 | 1.043972 | 1.2074   | 0.00181  |
| PVRIG    | 0.981706 | 0.869173 | 1.108808 | 0.766287 |
| GPC2     | 1.03373  | 0.968027 | 1.103893 | 0.322123 |
| SIPA1    | 1.097663 | 1.022137 | 1.178769 | 0.010409 |
| SYNJ2BP  | 1.102144 | 1.023129 | 1.187261 | 0.010395 |
| ARL2     | 1.122434 | 1.046279 | 1.204133 | 0.001273 |
| SRA1     | 1.003489 | 0.899896 | 1.119008 | 0.95004  |
| DNAJC9   | 1.065396 | 0.967379 | 1.173343 | 0.198286 |
| VDAC1    | 1.015517 | 0.929959 | 1.108947 | 0.731671 |
| ZBTB9    | 1.074096 | 0.988922 | 1.166605 | 0.089944 |
| HEXA     | 0.97726  | 0.902621 | 1.058072 | 0.570411 |
| NDUFS3   | 1.149798 | 1.020785 | 1.295116 | 0.021519 |
| LEPROT   | 1.034321 | 0.954046 | 1.12135  | 0.412972 |
| LBH      | 0.973723 | 0.917936 | 1.0329   | 0.376363 |
| ADAT3    | 1.00672  | 0.910255 | 1.113409 | 0.89631  |
| PPP1CB   | 1.002424 | 0.928753 | 1.08194  | 0.950425 |
| GPSM3    | 0.925626 | 0.840935 | 1.018847 | 0.114432 |
| LAT      | 1.099955 | 0.999938 | 1.209976 | 0.05015  |
| NCKIPSD  | 1.007643 | 0.932038 | 1.089381 | 0.848258 |
| ATF6B    | 1.029859 | 0.925243 | 1.146305 | 0.59035  |
| S1PR3    | 0.981637 | 0.913094 | 1.055325 | 0.61577  |
| CLIC1    | 0.938907 | 0.852512 | 1.034056 | 0.200551 |
| DDAH2    | 0.906422 | 0.843824 | 0.973664 | 0.007125 |
| RPS29    | 0.952414 | 0.896694 | 1.011596 | 0.112936 |
| UGT2B11  | 0.777755 | 0.734611 | 0.823434 | 6.04E-18 |
| ATP6V1G2 | 1.179739 | 1.028684 | 1.352976 | 0.018054 |
| ZNF134   | 0.954348 | 0.888729 | 1.024811 | 0.198569 |
| DDX47    | 1.014264 | 0.940403 | 1.093927 | 0.713506 |
| ZNF845   | 1.140466 | 1.049973 | 1.238758 | 0.001833 |
| KLRK1    | 1.046281 | 0.937054 | 1.16824  | 0.421254 |
| EMP2     | 1.229958 | 1.114186 | 1.35776  | 4.07E-05 |
| KCTD11   | 1.053824 | 0.963937 | 1.152092 | 0.249111 |
| LTB4R    | 1.172613 | 1.088916 | 1.262744 | 2.50E-05 |
| LTB4R2   | 1.149598 | 1.063955 | 1.242135 | 0.000416 |
| DNASE1   | 1.039875 | 0.977526 | 1.106201 | 0.215179 |
| CSNK1E   | 0.898778 | 0.833203 | 0.969514 | 0.005764 |
| IRF9     | 1.018262 | 0.960898 | 1.079051 | 0.54072  |
| GALT     | 1.209788 | 1.101396 | 1.328848 | 6.99E-05 |
| HBG1     | 1.049831 | 0.998901 | 1.103358 | 0.055285 |
| CLDN9    | 0.978609 | 0.908675 | 1.053925 | 0.567594 |
| KRT18P17 | 0.768823 | 0.599989 | 0.985167 | 0.037701 |
| NUDT19   | 0.996001 | 0.925225 | 1.072191 | 0.915153 |
| TAX1BP3  | 1.044088 | 0.927563 | 1.175251 | 0.474878 |
| AP1G2    | 1.12216  | 1.031695 | 1.220558 | 0.007198 |
| ZNF90    | 0.976418 | 0.888029 | 1.073604 | 0.622049 |
| MEF2B    | 1.069672 | 0.90635  | 1.262426 | 0.425593 |
| GANC     | 1.007287 | 0.940945 | 1.078305 | 0.834558 |
| TTLL3    | 1.073071 | 0.995313 | 1.156903 | 0.066128 |
| REPIN1   | 0.970102 | 0.900226 | 1.045401 | 0.426124 |
| MRPL23   | 0.967781 | 0.892662 | 1.049221 | 0.426944 |
| UCA1     | 0.891817 | 0.781441 | 1.017784 | 0.089421 |
| TSPAN4   | 0.888795 | 0.823227 | 0.959587 | 0.00257  |

|          |          |          |          |          |
|----------|----------|----------|----------|----------|
| CPNE1    | 1.022961 | 0.941946 | 1.110945 | 0.589704 |
| ARL16    | 1.117637 | 0.997348 | 1.252435 | 0.055587 |
| LYRM4    | 1.016861 | 0.912331 | 1.133367 | 0.762569 |
| MYCBP    | 1.195058 | 1.09459  | 1.304747 | 6.97E-05 |
| PRCD     | 0.776025 | 0.668489 | 0.900861 | 0.000863 |
| ALG3     | 1.085683 | 1.003416 | 1.174695 | 0.040877 |
| FIS1     | 1.044214 | 0.938483 | 1.161858 | 0.427011 |
| MBLAC1   | 1.080468 | 0.971867 | 1.201204 | 0.152149 |
| NEURL1B  | 1.014288 | 0.965685 | 1.065338 | 0.571207 |
| PLIN5    | 1.093639 | 1.011601 | 1.182329 | 0.024456 |
| HIGD1C   | 1.061982 | 0.939554 | 1.200363 | 0.335913 |
| PPME1    | 1.153772 | 1.056346 | 1.260184 | 0.001484 |
| STARD10  | 1.071227 | 0.994624 | 1.153731 | 0.069131 |
| MEG3     | 0.964082 | 0.915805 | 1.014904 | 0.162846 |
| IFRD2    | 1.098811 | 1.013294 | 1.191546 | 0.022642 |
| CAPN14   | 1.077618 | 0.974471 | 1.191682 | 0.145338 |
| ZBED1    | 1.018607 | 0.940418 | 1.103297 | 0.650955 |
| HNRNPUL  | 1.080932 | 0.988932 | 1.18149  | 0.086393 |
| POLR2J4  | 1.103291 | 0.990855 | 1.228485 | 0.073062 |
| MTCP1    | 1.155255 | 0.981981 | 1.359102 | 0.081744 |
| SMTNL1   | 1.006132 | 0.949124 | 1.066565 | 0.837241 |
| ZSWIM7   | 0.981719 | 0.883923 | 1.090334 | 0.730381 |
| LRRC69   | 1.097197 | 1.004969 | 1.19789  | 0.038396 |
| PHB2     | 0.883134 | 0.797836 | 0.977551 | 0.016482 |
| NEURL4   | 1.036377 | 0.968008 | 1.109574 | 0.304818 |
| UBXN2B   | 1.119811 | 1.030811 | 1.216496 | 0.007403 |
| CBWD6    | 0.896918 | 0.785569 | 1.02405  | 0.10771  |
| FAM166B  | 0.926252 | 0.845772 | 1.014391 | 0.098559 |
| PEX26    | 1.042825 | 0.967581 | 1.12392  | 0.27244  |
| FASTKD5  | 1.001211 | 0.931431 | 1.076219 | 0.973801 |
| GOLGA8B  | 1.099595 | 1.048073 | 1.153649 | 0.000105 |
| HOMEZ    | 1.049378 | 0.962996 | 1.143508 | 0.271473 |
| DDX3X    | 0.940247 | 0.875518 | 1.009761 | 0.090448 |
| VPS16    | 1.183982 | 1.073333 | 1.306037 | 0.000742 |
| MYL5     | 1.143361 | 1.043262 | 1.253064 | 0.004157 |
| ZNF407   | 1.008292 | 0.948035 | 1.072379 | 0.792822 |
| NPEPL1   | 1.101365 | 1.005329 | 1.206575 | 0.038067 |
| SIAH3    | 1.036269 | 0.926273 | 1.159327 | 0.533762 |
| GCGR     | 0.83531  | 0.732278 | 0.95284  | 0.00738  |
| CELA2B   | 0.970522 | 0.89845  | 1.048377 | 0.447262 |
| TMEM167I | 0.949658 | 0.872081 | 1.034137 | 0.23485  |
| FAM72D   | 1.269156 | 1.11213  | 1.448352 | 0.000405 |
| TNFRSF25 | 0.979847 | 0.925136 | 1.037794 | 0.48738  |
| ZC3H11B  | 0.823073 | 0.711705 | 0.951868 | 0.008665 |
| TSTD1    | 0.937504 | 0.866494 | 1.014334 | 0.108314 |
| PDZK1P1  | 1.230976 | 1.099698 | 1.377927 | 0.000304 |
| CYB5RL   | 1.070738 | 0.983784 | 1.165378 | 0.113735 |
| TTC34    | 1.305933 | 1.126823 | 1.513513 | 0.000391 |
| MMP23A   | 0.879756 | 0.74705  | 1.036036 | 0.124632 |
| ATAD3C   | 0.855533 | 0.727881 | 1.005573 | 0.058417 |
| MIR942   | 1.058537 | 1.005838 | 1.113998 | 0.029009 |
| MIR933   | 0.98023  | 0.943973 | 1.017879 | 0.299072 |
| MIR874   | 1.092052 | 1.01502  | 1.174931 | 0.018304 |
| MIR938   | 0.97194  | 0.930471 | 1.015257 | 0.20078  |
| MIR875   | 1.029829 | 0.971646 | 1.091497 | 0.321886 |
| MIR920   | 1.085876 | 1.021397 | 1.154426 | 0.008344 |
| IFI30    | 1.011498 | 0.9653   | 1.059907 | 0.631715 |
| CCDC7    | 1.092911 | 1.012066 | 1.180214 | 0.02346  |

|           |          |          |          |          |
|-----------|----------|----------|----------|----------|
| FNIP1     | 0.960075 | 0.905274 | 1.018193 | 0.174236 |
| CKLF      | 1.164491 | 1.073091 | 1.263677 | 0.000261 |
| RPS10P3   | 0.921685 | 0.853061 | 0.995828 | 0.038841 |
| ZNF579    | 0.876294 | 0.806535 | 0.952086 | 0.001808 |
| RNASEK    | 1.048819 | 0.957266 | 1.149128 | 0.306403 |
| NBPF1     | 1.11876  | 1.02901  | 1.216338 | 0.008533 |
| LINGO3    | 0.967779 | 0.918731 | 1.019446 | 0.217132 |
| VAMP2     | 0.875297 | 0.7996   | 0.958161 | 0.003901 |
| MIR1250   | 1.048338 | 0.995618 | 1.103849 | 0.072952 |
| MIR1272   | 1.044084 | 0.983736 | 1.108135 | 0.155562 |
| MIR1286   | 0.935202 | 0.886584 | 0.986486 | 0.013913 |
| MIR1296   | 1.000485 | 0.960275 | 1.042379 | 0.981501 |
| SNORD111  | 1.037379 | 0.982576 | 1.095239 | 0.185099 |
| MIR1302-5 | 1.083825 | 1.03562  | 1.134274 | 0.000525 |
| SNORA111  | 1.024349 | 0.97029  | 1.081419 | 0.384485 |
| MIR548E   | 0.99225  | 0.951057 | 1.035226 | 0.719112 |
| MIR548L   | 0.997212 | 0.956267 | 1.03991  | 0.896169 |
| MIR548P   | 0.98236  | 0.916828 | 1.052576 | 0.613377 |
| MIR1284   | 0.996689 | 0.953823 | 1.041481 | 0.882436 |
| MIR1255A  | 0.945147 | 0.906391 | 0.98556  | 0.00827  |
| MIR1302-8 | 1.111062 | 1.019854 | 1.210428 | 0.015961 |
| MIR548I2  | 0.995813 | 0.930927 | 1.065222 | 0.902867 |
| MIR663B   | 0.985248 | 0.961412 | 1.009675 | 0.234275 |
| SNORA79   | 1.030901 | 0.963806 | 1.102667 | 0.375446 |
| MIR1200   | 0.987819 | 0.952498 | 1.02445  | 0.509452 |
| MIR548Q   | 1.003569 | 0.954809 | 1.054818 | 0.888514 |
| MIR548K   | 0.990345 | 0.951963 | 1.030276 | 0.630487 |
| MIR1288   | 0.980888 | 0.9264   | 1.038582 | 0.508134 |
| MIR320B2  | 1.02166  | 0.961344 | 1.08576  | 0.490078 |
| MIR1301   | 0.995182 | 0.944698 | 1.048364 | 0.855726 |
| MIR1202   | 0.991779 | 0.94824  | 1.037317 | 0.718544 |
| MIR1277   | 1.021103 | 0.969388 | 1.075576 | 0.43098  |
| MIR1271   | 1.088744 | 1.014911 | 1.167949 | 0.017642 |
| MIR1827   | 1.102666 | 1.047952 | 1.160235 | 0.000167 |
| MIR320C1  | 0.968585 | 0.919927 | 1.019816 | 0.22483  |
| SNORD100  | 1.009059 | 0.960528 | 1.060042 | 0.719905 |
| MIR548O   | 0.988547 | 0.939236 | 1.040448 | 0.659071 |
| SNORD112  | 1.015673 | 0.967976 | 1.065721 | 0.526279 |
| MIR548H1  | 1.011037 | 0.951835 | 1.073922 | 0.72143  |
| SNORD99   | 1.000809 | 0.955113 | 1.048691 | 0.972945 |
| MIR1180   | 0.977446 | 0.894986 | 1.067504 | 0.61194  |
| MIR1255B  | 0.974473 | 0.906496 | 1.047549 | 0.483383 |
| MIR1249   | 1.040456 | 0.983729 | 1.100454 | 0.165611 |
| MIR1276   | 0.953045 | 0.907014 | 1.001412 | 0.056899 |
| SNORA77   | 1.176381 | 1.105593 | 1.251701 | 2.89E-07 |
| MIR1290   | 1.004827 | 0.964484 | 1.046857 | 0.817847 |
| MIR548N   | 1.004954 | 0.918149 | 1.099967 | 0.914613 |
| RNU6ATA1  | 1.088486 | 1.029503 | 1.150849 | 0.002855 |
| MIR1278   | 1.007582 | 0.965936 | 1.051025 | 0.725788 |
| SNORA11   | 1.040079 | 0.979615 | 1.104274 | 0.198451 |
| MIR1203   | 0.998905 | 0.948378 | 1.052123 | 0.966986 |
| SNORD93   | 1.079165 | 1.00949  | 1.153649 | 0.025265 |
| MIR548J   | 1.047555 | 0.999377 | 1.098055 | 0.053112 |
| MIR1289-1 | 1.02221  | 0.954616 | 1.094589 | 0.529135 |
| MIR1205   | 1.016486 | 0.969704 | 1.065526 | 0.496371 |
| MIR548F2  | 1.024337 | 0.863838 | 1.214656 | 0.782128 |
| MIR1183   | 0.982816 | 0.926559 | 1.04249  | 0.56439  |
| MIR1256   | 1.003662 | 0.963976 | 1.044981 | 0.85907  |

|          |          |          |          |          |
|----------|----------|----------|----------|----------|
| PPP3R1   | 0.943021 | 0.873365 | 1.018233 | 0.134014 |
| FANCG    | 1.282399 | 1.123308 | 1.464021 | 0.000233 |
| AP4M1    | 1.059268 | 0.947245 | 1.184538 | 0.312677 |
| TAS2R41  | 1.025521 | 0.961835 | 1.093424 | 0.441065 |
| PLXNA4   | 1.18539  | 1.090857 | 1.288115 | 6.05E-05 |
| CEBPD    | 0.941589 | 0.905109 | 0.979538 | 0.002832 |
| OR3A2    | 0.957316 | 0.850737 | 1.077246 | 0.468835 |
| NPTXR    | 1.12792  | 1.032377 | 1.232306 | 0.007686 |
| PPP2R2A  | 0.941685 | 0.877436 | 1.010638 | 0.095622 |
| TRIM16   | 1.138437 | 1.037768 | 1.248871 | 0.006055 |
| TIGD1    | 1.143016 | 1.051983 | 1.241927 | 0.001595 |
| FXYP7    | 0.985884 | 0.870798 | 1.11618  | 0.822389 |
| SLC12A8  | 1.360576 | 1.228059 | 1.507392 | 3.88E-09 |
| KIR2DS4  | 1.141557 | 1.023362 | 1.273402 | 0.017593 |
| APOL6    | 1.015211 | 0.953254 | 1.081195 | 0.638444 |
| FADS3    | 1.013014 | 0.947132 | 1.083478 | 0.706283 |
| CCNL2    | 1.035369 | 0.963953 | 1.112075 | 0.340498 |
| UBA52    | 0.91698  | 0.840199 | 1.000776 | 0.052068 |
| MYBPHL   | 1.113864 | 1.016951 | 1.220012 | 0.020239 |
| PPT2     | 0.981806 | 0.912581 | 1.056282 | 0.622575 |
| ZNF630   | 1.093871 | 0.986459 | 1.212978 | 0.088863 |
| TIAF1    | 1.077059 | 1.002741 | 1.156886 | 0.041852 |
| DCDC2B   | 1.043486 | 0.966123 | 1.127044 | 0.278779 |
| MIR1915  | 1.123394 | 1.082585 | 1.165741 | 7.14E-10 |
| SNORD121 | 0.972854 | 0.925971 | 1.022111 | 0.274784 |
| SNORA361 | 1.031551 | 0.944526 | 1.126596 | 0.489695 |
| MIR1537  | 0.993983 | 0.959657 | 1.029536 | 0.736418 |
| MIR1913  | 0.891834 | 0.840567 | 0.946227 | 0.000151 |
| SNORD71  | 0.967688 | 0.930237 | 1.006646 | 0.102886 |
| EXOSC6   | 1.079754 | 0.991607 | 1.175737 | 0.077397 |
| VPS52    | 1.065115 | 0.982474 | 1.154708 | 0.125798 |
| RPL23AP5 | 1.100439 | 1.008813 | 1.200387 | 0.030945 |
| CDRT15   | 1.093272 | 0.993029 | 1.203633 | 0.069155 |
| ZNF844   | 0.997321 | 0.923067 | 1.077549 | 0.945827 |
| HBD      | 0.99814  | 0.969552 | 1.027572 | 0.900081 |
| RFPL4A   | 1.01454  | 0.93638  | 1.099226 | 0.724149 |
| HLA-DPB1 | 0.957386 | 0.918101 | 0.998353 | 0.041642 |
| OR2L1P   | 1.058601 | 0.981916 | 1.141274 | 0.137728 |
| ATXN1L   | 0.920873 | 0.861845 | 0.983943 | 0.014733 |
| HLA-DPB2 | 1.072462 | 0.982581 | 1.170565 | 0.117235 |
| TMEM1831 | 0.948472 | 0.855221 | 1.05189  | 0.316389 |
| SRP14P1  | 1.065253 | 0.952369 | 1.191517 | 0.268707 |
| INE1     | 0.996582 | 0.930473 | 1.067388 | 0.922122 |
| BRI3P1   | 1.021692 | 0.936163 | 1.115035 | 0.63044  |
| PLEKHM1  | 0.951285 | 0.877648 | 1.031099 | 0.22439  |
| HSPA7    | 1.053777 | 1.013992 | 1.095124 | 0.00764  |
| ZNF469   | 0.940813 | 0.874644 | 1.011989 | 0.101073 |
| SLC26A6  | 1.112276 | 1.040932 | 1.188509 | 0.001655 |
| DHRS4L1  | 1.170375 | 0.996018 | 1.375254 | 0.055941 |
| MIAT     | 1.052927 | 0.975094 | 1.136973 | 0.188084 |
| ERCC6    | 1.137595 | 1.042264 | 1.241646 | 0.00389  |
| NOL7     | 1.029617 | 0.92008  | 1.152194 | 0.611054 |
| GTF2H2B  | 0.947298 | 0.876049 | 1.024342 | 0.174745 |
| TMEM191  | 1.095308 | 0.943195 | 1.271953 | 0.232732 |
| NPY6R    | 1.081829 | 0.981458 | 1.192464 | 0.11337  |
| TMEM1851 | 1.127037 | 1.041912 | 1.219117 | 0.002839 |
| SMCR5    | 1.072087 | 0.989873 | 1.16113  | 0.087282 |
| TAS2R46  | 0.995489 | 0.939918 | 1.054345 | 0.877385 |

|          |          |          |          |          |
|----------|----------|----------|----------|----------|
| SRRM5    | 0.987677 | 0.891022 | 1.094816 | 0.813446 |
| FAM30A   | 1.085581 | 1.047368 | 1.125188 | 7.08E-06 |
| PGAM4    | 0.956112 | 0.878303 | 1.040813 | 0.300058 |
| HNRNPA3  | 0.76204  | 0.614883 | 0.944415 | 0.013051 |
| LTA      | 1.006055 | 0.934477 | 1.083117 | 0.872628 |
| WDR46    | 1.0701   | 0.964634 | 1.187098 | 0.200611 |
| ZNF717   | 0.987298 | 0.917571 | 1.062323 | 0.732285 |
| PARG     | 1.037319 | 0.966461 | 1.113373 | 0.310123 |
| SCAMP4   | 0.932508 | 0.848765 | 1.024512 | 0.145521 |
| LTB      | 1.051896 | 0.99226  | 1.115116 | 0.089316 |
| POLR2J2  | 1.01496  | 0.938983 | 1.097084 | 0.708362 |
| PPIAP19  | 1.059322 | 0.981718 | 1.14306  | 0.137645 |
| ORM2     | 0.994609 | 0.943873 | 1.048072 | 0.839646 |
| LYPLA2P1 | 0.994983 | 0.834941 | 1.185702 | 0.955172 |
| CCT6P1   | 0.991851 | 0.916575 | 1.073309 | 0.838992 |
| ARL17B   | 0.996722 | 0.913462 | 1.08757  | 0.941183 |
| DHFR     | 1.075587 | 1.004718 | 1.151455 | 0.036143 |
| RPL41    | 0.926423 | 0.875492 | 0.980316 | 0.008071 |
| CCDC26   | 1.015627 | 0.939469 | 1.097958 | 0.696614 |
| TTY10    | 1.046884 | 0.977073 | 1.121684 | 0.193174 |
| ORM1     | 1.010937 | 0.970859 | 1.052669 | 0.598165 |
| HLA-DRB1 | 0.97785  | 0.942102 | 1.014955 | 0.238496 |
| SPINK8   | 1.070034 | 0.994124 | 1.151742 | 0.07139  |
| PATL2    | 1.001291 | 0.929971 | 1.07808  | 0.972707 |
| ZNF492   | 0.889732 | 0.812428 | 0.974392 | 0.011757 |
| XIST     | 0.996755 | 0.974957 | 1.01904  | 0.773286 |
| ZNF688   | 1.193668 | 1.058006 | 1.346725 | 0.004028 |
| EMX2OS   | 0.991664 | 0.885714 | 1.110288 | 0.884548 |
| HBBP1    | 1.104024 | 1.045918 | 1.165358 | 0.000334 |
| ACBD6    | 0.999808 | 0.900344 | 1.110259 | 0.997132 |
| HERC2P4  | 1.14178  | 1.062455 | 1.227027 | 0.000307 |
| DSCR9    | 1.108072 | 1.010316 | 1.215287 | 0.029424 |
| ANKRD18F | 1.18982  | 1.13262  | 1.249909 | 4.71E-12 |
| PA2G4P4  | 0.894683 | 0.813177 | 0.98436  | 0.022406 |
| PRB4     | 0.984935 | 0.920975 | 1.053336 | 0.657675 |
| YY2      | 1.044539 | 0.89415  | 1.220223 | 0.582738 |
| HSBP1    | 1.128862 | 1.016364 | 1.253812 | 0.023635 |
| HCG18    | 1.048796 | 0.971184 | 1.13261  | 0.224536 |
| HLA-DPA1 | 0.959378 | 0.924256 | 0.995834 | 0.029303 |
| RPS18    | 0.939306 | 0.883103 | 0.999086 | 0.046699 |
| SNORD62I | 0.935332 | 0.884505 | 0.989081 | 0.019022 |
| DLEU2    | 1.079533 | 0.988504 | 1.178945 | 0.088625 |
| PRH1     | 1.022621 | 0.952007 | 1.098473 | 0.540048 |
| TAPBP    | 1.050406 | 0.95439  | 1.156081 | 0.314665 |
| ANXA2P2  | 0.980439 | 0.923464 | 1.040929 | 0.517807 |
| MCTS1    | 1.081474 | 0.958358 | 1.220406 | 0.204018 |
| DYTN     | 1.096822 | 1.032835 | 1.164773 | 0.002583 |
| HLA-DQB1 | 0.954409 | 0.905854 | 1.005566 | 0.079838 |
| TNF      | 1.04147  | 0.998135 | 1.086687 | 0.06095  |
| SNHG7    | 0.856598 | 0.79573  | 0.922123 | 3.86E-05 |
| RAB1C    | 0.910166 | 0.805982 | 1.027816 | 0.12911  |
| GPX1     | 0.99984  | 0.931383 | 1.073329 | 0.996474 |
| KRT8P15  | 1.0814   | 0.998635 | 1.171025 | 0.054062 |
| MYCNOS   | 1.078973 | 1.00892  | 1.153891 | 0.02647  |
| RPS28    | 0.932807 | 0.869934 | 1.000225 | 0.050743 |
| UQCRHL   | 1.090068 | 0.963814 | 1.23286  | 0.169713 |
| NUDT9P1  | 1.162521 | 1.035991 | 1.304505 | 0.010426 |
| TRIM26   | 0.946274 | 0.868471 | 1.031047 | 0.20712  |

|          |          |          |          |          |
|----------|----------|----------|----------|----------|
| FAM133B  | 0.981078 | 0.890205 | 1.081226 | 0.700079 |
| JRK      | 1.034156 | 0.9708   | 1.101646 | 0.297774 |
| GAS5     | 0.863291 | 0.793162 | 0.939619 | 0.000672 |
| HLA-B    | 0.973956 | 0.897428 | 1.057009 | 0.527352 |
| MORF4    | 0.863    | 0.761992 | 0.977396 | 0.020344 |
| MIR155HC | 1.114614 | 1.048612 | 1.184771 | 0.000494 |
| APOC2    | 1.071005 | 0.963637 | 1.190337 | 0.203116 |
| SUMO1P3  | 0.980112 | 0.917682 | 1.046789 | 0.549689 |
| PPP1R3E  | 1.057776 | 0.973245 | 1.149649 | 0.186241 |
| SNORA71H | 1.011066 | 0.956993 | 1.068194 | 0.694739 |
| NFAM1    | 0.973331 | 0.936307 | 1.011819 | 0.171894 |
| CYCSP52  | 1.003964 | 0.94712  | 1.064221 | 0.89416  |
| KIAA0040 | 1.005883 | 0.937535 | 1.079214 | 0.870217 |
| IFITM4P  | 1.190738 | 1.107595 | 1.280124 | 2.28E-06 |
| B3GALT4  | 1.057072 | 0.973654 | 1.147637 | 0.185715 |
| EGOT     | 1.020518 | 0.971623 | 1.071874 | 0.417488 |
| PNMA6A   | 1.140393 | 1.019076 | 1.276151 | 0.022065 |
| ZBTB22   | 0.963051 | 0.886983 | 1.045643 | 0.369817 |
| CLEC2L   | 0.824404 | 0.749602 | 0.906671 | 6.93E-05 |
| ZBED5    | 1.08568  | 0.996187 | 1.183214 | 0.061079 |
| SLFN14   | 1.039164 | 0.979962 | 1.101942 | 0.19927  |
| BCYRN1   | 1.043025 | 1.008409 | 1.07883  | 0.014435 |
| B3GNT9   | 1.022882 | 0.941639 | 1.111134 | 0.592094 |
| CDKN2AIP | 1.054297 | 0.936606 | 1.186776 | 0.381296 |
| CECR7    | 1.128619 | 1.038835 | 1.226162 | 0.004226 |
| RGL2     | 1.07789  | 0.998123 | 1.164032 | 0.055868 |
| ID2B     | 1.004733 | 0.904424 | 1.116167 | 0.929888 |
| HLA-DQA  | 0.975115 | 0.944503 | 1.006719 | 0.121507 |
| PYY2     | 1.088887 | 0.986127 | 1.202355 | 0.092232 |
| KIFC1    | 1.075006 | 1.014716 | 1.138877 | 0.014047 |
| IRGM     | 0.931115 | 0.869543 | 0.997047 | 0.040885 |
| PTENP1   | 1.094381 | 0.980098 | 1.221991 | 0.108997 |
| LRR37A2  | 0.980943 | 0.903354 | 1.065196 | 0.647197 |
| OR2W3    | 1.008464 | 0.963115 | 1.055948 | 0.71958  |
| PAGE2B   | 1.006928 | 0.91004  | 1.114131 | 0.893601 |
| SNORD12  | 0.997986 | 0.909895 | 1.094606 | 0.965901 |
| SNORD11  | 0.985176 | 0.92831  | 1.045526 | 0.622479 |
| SNORD12  | 1.033207 | 0.982675 | 1.086338 | 0.20165  |
| SNORA13  | 1.082813 | 1.021045 | 1.148317 | 0.007933 |
| SNORD42  | 1.164538 | 1.074711 | 1.261872 | 0.0002   |
| MIR1976  | 1.131249 | 1.042739 | 1.227271 | 0.003009 |
| SCARNA7  | 1.034737 | 0.997351 | 1.073525 | 0.068962 |
| SNORD12  | 1.027868 | 0.966469 | 1.093168 | 0.381754 |
| SCARNA18 | 1.069745 | 1.013776 | 1.128804 | 0.013934 |
| SNORD12  | 1.005159 | 0.956236 | 1.056585 | 0.839828 |
| SNORA47  | 0.980382 | 0.932241 | 1.03101  | 0.440575 |
| SNORD13  | 1.019469 | 0.980055 | 1.060469 | 0.337809 |
| SNORD12  | 0.986917 | 0.935165 | 1.041534 | 0.631805 |
| SNORA59  | 1.030078 | 0.978813 | 1.084027 | 0.255211 |
| SNORA84  | 0.955807 | 0.886527 | 1.030501 | 0.239055 |
| TXNDC5   | 0.930736 | 0.8508   | 1.018183 | 0.117192 |
| RNF103   | 0.978602 | 0.917484 | 1.04379  | 0.510924 |
| RBM14    | 0.966756 | 0.915791 | 1.020557 | 0.221122 |
| ALKBH6   | 1.279367 | 1.108434 | 1.476659 | 0.00076  |
| ASB14    | 0.934013 | 0.87681  | 0.994948 | 0.034256 |
| NME1     | 1.196128 | 1.105477 | 1.294214 | 8.44E-06 |
| TNFSF12  | 0.962183 | 0.89183  | 1.038086 | 0.319687 |
| CDRT4    | 1.028562 | 0.936336 | 1.129871 | 0.556839 |



|           |          |          |          |          |
|-----------|----------|----------|----------|----------|
| APOBEC3C  | 1.133096 | 1.022668 | 1.255448 | 0.016921 |
| WBP1      | 1.157009 | 1.057933 | 1.265363 | 0.001408 |
| MRPS17    | 1.138907 | 1.039959 | 1.24727  | 0.005033 |
| DEFA3     | 1.018608 | 0.99882  | 1.038789 | 0.06547  |
| ADSL      | 1.054393 | 0.970914 | 1.145049 | 0.208185 |
| LILRA4    | 1.05744  | 0.972419 | 1.149895 | 0.191559 |
| LILRA2    | 0.974656 | 0.925984 | 1.025885 | 0.326008 |
| AMY2B     | 1.05085  | 0.948317 | 1.16447  | 0.343697 |
| LY6G5B    | 1.001781 | 0.929643 | 1.079516 | 0.96278  |
| PSMB9     | 1.153706 | 1.07489  | 1.238301 | 7.49E-05 |
| PCDHGC3   | 0.936176 | 0.870348 | 1.006983 | 0.076246 |
| COX19     | 1.026165 | 0.937924 | 1.122708 | 0.573427 |
| DEFA1B    | 1.104223 | 1.025739 | 1.188712 | 0.008401 |
| GHRLOS    | 1.039803 | 0.965927 | 1.119328 | 0.299266 |
| ACAD11    | 1.021427 | 0.886841 | 1.176437 | 0.768687 |
| PPIL3     | 0.943045 | 0.845999 | 1.051225 | 0.289893 |
| RPL23AP7  | 1.00484  | 0.907103 | 1.113108 | 0.926321 |
| KIR3DL2   | 1.157507 | 1.026387 | 1.305377 | 0.017099 |
| RPL29P2   | 1.01244  | 0.859912 | 1.192022 | 0.882033 |
| TNFRSF13  | 0.901171 | 0.771716 | 1.052342 | 0.188453 |
| AQP1      | 0.974412 | 0.931443 | 1.019364 | 0.259964 |
| ISY1      | 1.064294 | 0.961513 | 1.178063 | 0.229155 |
| PCDHGC5   | 0.895078 | 0.802029 | 0.998922 | 0.04779  |
| RDH14     | 1.096118 | 0.988801 | 1.215082 | 0.080858 |
| PLCXD2    | 1.019611 | 0.954316 | 1.089375 | 0.565184 |
| NSUN6     | 1.070878 | 0.99583  | 1.151582 | 0.064711 |
| HLA-DOB   | 1.041916 | 0.973101 | 1.115597 | 0.238867 |
| KRTAP5-8  | 1.055016 | 0.935592 | 1.189682 | 0.382243 |
| CRCP      | 0.955263 | 0.880477 | 1.0364   | 0.271167 |
| RPL36A    | 1.061531 | 0.975598 | 1.155033 | 0.165631 |
| PDXP      | 1.11768  | 1.020822 | 1.223727 | 0.016148 |
| RPP21     | 1.126385 | 0.99693  | 1.27265  | 0.056056 |
| CD302     | 0.889038 | 0.822354 | 0.961128 | 0.00311  |
| EGFL8     | 1.042877 | 0.954416 | 1.139537 | 0.353243 |
| ARHGAP8   | 1.122031 | 1.026554 | 1.226388 | 0.011163 |
| ARPC4     | 1.19297  | 1.071707 | 1.327954 | 0.001254 |
| CORT      | 1.063208 | 0.932839 | 1.211797 | 0.358456 |
| ARPC1A    | 1.125784 | 1.00786  | 1.257505 | 0.035849 |
| SUMO1P1   | 1.070946 | 1.020296 | 1.124111 | 0.005558 |
| PLEKHO2   | 0.979736 | 0.918103 | 1.045508 | 0.536883 |
| PISD      | 1.06     | 0.968318 | 1.160364 | 0.20679  |
| PWP2      | 1.170933 | 1.059174 | 1.294483 | 0.002048 |
| PI4KA     | 1.010009 | 0.930771 | 1.095992 | 0.811175 |
| AMACR     | 1.161353 | 0.969508 | 1.39116  | 0.104417 |
| SNHG3     | 0.942199 | 0.86909  | 1.021457 | 0.148519 |
| ARFGAP3   | 0.950209 | 0.873936 | 1.033139 | 0.231572 |
| BGLAP     | 1.068898 | 0.973513 | 1.173628 | 0.162386 |
| PEG10     | 1.135863 | 1.017456 | 1.268049 | 0.023325 |
| AK2P2     | 1.027368 | 0.928724 | 1.136489 | 0.600109 |
| EIF6      | 1.05128  | 0.95422  | 1.158212 | 0.311625 |
| PCDHGC4   | 0.907007 | 0.816998 | 1.006932 | 0.067188 |
| MRPL20    | 1.201493 | 1.048608 | 1.37667  | 0.008206 |
| SERPINB1C | 0.964429 | 0.9274   | 1.002936 | 0.069804 |
| HLA-DMB   | 0.947639 | 0.902802 | 0.994703 | 0.029649 |
| DECR2     | 1.063574 | 0.952553 | 1.187536 | 0.273181 |
| CNTF      | 0.983463 | 0.918187 | 1.05338  | 0.634166 |
| ZNF702P   | 0.91117  | 0.799754 | 1.038106 | 0.162125 |
| ZNF709    | 0.994151 | 0.881464 | 1.121245 | 0.923867 |

|          |          |          |          |          |
|----------|----------|----------|----------|----------|
| EIF4EBP3 | 0.932109 | 0.851888 | 1.019884 | 0.125727 |
| ABCC13   | 1.036259 | 0.926064 | 1.159568 | 0.534658 |
| MRPL33   | 1.034507 | 0.97633  | 1.09615  | 0.250639 |
| MICAL3   | 0.967462 | 0.902068 | 1.037598 | 0.35426  |
| STON1    | 1.222275 | 1.080738 | 1.382349 | 0.001391 |
| PRAF2    | 1.178347 | 1.037908 | 1.337788 | 0.011258 |
| KCTD7    | 0.958405 | 0.90128  | 1.019151 | 0.17543  |
| EFNA4    | 1.19356  | 1.095657 | 1.300212 | 5.08E-05 |
| INGX     | 1.087701 | 0.94809  | 1.247871 | 0.230366 |
| AOX2P    | 0.951883 | 0.911289 | 0.994286 | 0.026578 |
| UPK3B    | 1.122348 | 1.018063 | 1.237316 | 0.020355 |
| IL10RB   | 1.049922 | 0.942372 | 1.169747 | 0.376961 |
| CFB      | 1.084921 | 0.964985 | 1.219764 | 0.17268  |
| ZNF487   | 1.0534   | 0.940038 | 1.180432 | 0.370508 |
| WDR92    | 1.116481 | 1.013391 | 1.230058 | 0.025809 |
| NME2     | 1.181875 | 1.056846 | 1.321695 | 0.003399 |
| PLA2G4B  | 1.255037 | 1.038892 | 1.516151 | 0.018492 |
| TTC4     | 1.477121 | 1.216801 | 1.793133 | 8.02E-05 |
| RPLP0P2  | 1.129081 | 0.96433  | 1.321979 | 0.131398 |
| JMJD7    | 1.144063 | 1.048075 | 1.248842 | 0.002611 |
| APOBEC3I | 0.972651 | 0.851425 | 1.111137 | 0.683052 |
| RPL12P6  | 0.933719 | 0.851811 | 1.023504 | 0.14319  |
| MRPS6    | 0.958444 | 0.884137 | 1.038996 | 0.302612 |
| ZNF512   | 1.062178 | 0.984938 | 1.145476 | 0.117357 |
| NFS1     | 1.206325 | 1.099398 | 1.32365  | 7.46E-05 |
| DDOST    | 0.981992 | 0.903175 | 1.067688 | 0.670334 |
| TMEM199  | 1.189515 | 1.067705 | 1.32522  | 0.001641 |
| P2RY11   | 1.051549 | 0.972161 | 1.137421 | 0.20947  |
| TMEM141  | 1.156759 | 1.034874 | 1.292998 | 0.010365 |
| DBNDD2   | 1.04898  | 0.906708 | 1.213576 | 0.520212 |
| ETV5     | 0.977328 | 0.921447 | 1.036598 | 0.445212 |
| KRTAP5-7 | 0.973878 | 0.852308 | 1.112788 | 0.697219 |
| RBM12    | 0.999568 | 0.923132 | 1.082332 | 0.991497 |
| LILRA6   | 1.009369 | 0.959548 | 1.061777 | 0.718033 |
| SCARF2   | 1.135928 | 1.02543  | 1.258332 | 0.01465  |
| APOBEC3C | 1.068334 | 0.983577 | 1.160395 | 0.117039 |
| KRT18P34 | 1.094836 | 0.987462 | 1.213887 | 0.085363 |
| ASPRV1   | 1.145388 | 1.044505 | 1.256014 | 0.003907 |
| FCGR2C   | 1.043744 | 1.001281 | 1.088009 | 0.043345 |
| UBE2V1   | 0.988855 | 0.927227 | 1.054578 | 0.732821 |
| HBB      | 0.965436 | 0.940258 | 0.991287 | 0.00908  |
| N4BP2L2  | 1.02768  | 0.95921  | 1.101038 | 0.437659 |
| ZNF585B  | 1.100673 | 1.013844 | 1.194937 | 0.022143 |
| CEBPA    | 0.933799 | 0.890465 | 0.979243 | 0.004726 |
| SNHG6    | 0.992702 | 0.944299 | 1.043586 | 0.773969 |
| DNM1P35  | 1.429465 | 1.282442 | 1.593342 | 1.10E-10 |
| PGAM5    | 0.962973 | 0.900547 | 1.029726 | 0.26987  |
| SNHG10   | 1.237371 | 1.126392 | 1.359285 | 8.90E-06 |
| ZCCHC3   | 1.043624 | 0.952576 | 1.143375 | 0.35925  |
| TWF2     | 1.132638 | 1.032151 | 1.242909 | 0.0086   |
| MARS2    | 1.091787 | 1.016235 | 1.172956 | 0.01639  |
| USP51    | 1.125468 | 1.02372  | 1.237328 | 0.01449  |
| BCKDHA   | 1.20761  | 1.08306  | 1.346482 | 0.000682 |
| INSL3    | 0.93314  | 0.872542 | 0.997948 | 0.043392 |
| PCDHGB8I | 0.969741 | 0.885187 | 1.062373 | 0.509188 |
| POU5F2   | 1.030961 | 0.967552 | 1.098526 | 0.346462 |
| PCP4L1   | 1.034582 | 0.939359 | 1.139459 | 0.490122 |
| ABHD14A  | 1.301639 | 1.178197 | 1.438015 | 2.15E-07 |

|          |          |          |          |          |
|----------|----------|----------|----------|----------|
| ANP32C   | 1.089237 | 0.896959 | 1.322734 | 0.388368 |
| CCDC153  | 0.851043 | 0.732815 | 0.988346 | 0.034552 |
| ACTN3    | 0.927268 | 0.797118 | 1.078667 | 0.327777 |
| FMN1     | 1.180982 | 1.092714 | 1.276381 | 2.70E-05 |
| SNORA58  | 1.065957 | 1.007954 | 1.127297 | 0.025255 |
| HAUS5    | 1.210167 | 1.103065 | 1.327669 | 5.47E-05 |
| SLED1    | 1.033789 | 0.989521 | 1.080037 | 0.136703 |
| TMEM150  | 1.215665 | 1.112716 | 1.32814  | 1.52E-05 |
| NAIP     | 1.076513 | 1.009392 | 1.148098 | 0.024797 |
| ZNF324B  | 1.127245 | 1.032884 | 1.230226 | 0.007245 |
| ZNF564   | 1.017127 | 0.950881 | 1.087989 | 0.621152 |
| PVT1     | 1.038361 | 0.969252 | 1.112397 | 0.284066 |
| PDCD6    | 1.067402 | 0.986264 | 1.155215 | 0.105865 |
| TMEM158  | 1.044371 | 0.986352 | 1.105803 | 0.136559 |
| YJEFN3   | 0.983172 | 0.909345 | 1.062993 | 0.670024 |
| PTTG2    | 1.009853 | 0.925356 | 1.102066 | 0.825935 |
| ZNF718   | 0.967177 | 0.914897 | 1.022445 | 0.239163 |
| GYPB     | 1.017087 | 0.977503 | 1.058273 | 0.402868 |
| CHCHD10  | 1.032683 | 0.97499  | 1.093789 | 0.272883 |
| GPR162   | 0.988678 | 0.933548 | 1.047063 | 0.697293 |
| ATP6V1E2 | 1.195802 | 1.054977 | 1.355426 | 0.005156 |
| GLI4     | 1.172834 | 1.078217 | 1.275755 | 0.000203 |
| RNF138P1 | 0.884283 | 0.819866 | 0.953763 | 0.001439 |
| ZNF674   | 1.057883 | 0.962745 | 1.162422 | 0.241874 |
| ZNF345   | 0.986284 | 0.911818 | 1.066832 | 0.730236 |
| SHANK3   | 0.975817 | 0.940303 | 1.012671 | 0.195578 |
| ZNF550   | 1.014832 | 0.942181 | 1.093084 | 0.697663 |
| RPL32P3  | 1.020797 | 0.951761 | 1.094841 | 0.56453  |
| FOXD1    | 1.260646 | 1.1292   | 1.407393 | 3.74E-05 |
| MALAT1   | 0.95066  | 0.904927 | 0.998704 | 0.044271 |
| PRB1     | 0.999187 | 0.922046 | 1.082782 | 0.984165 |
| SCARNA8  | 0.98675  | 0.935164 | 1.041181 | 0.626343 |
| SCARNA6  | 1.01208  | 0.981174 | 1.043959 | 0.447931 |
| SCARNA23 | 1.057191 | 0.997411 | 1.120554 | 0.061114 |
| SNORD79  | 0.994696 | 0.935887 | 1.057201 | 0.864201 |
| SCARNA17 | 1.024225 | 0.959611 | 1.09319  | 0.471554 |
| SCARNA5  | 1.015099 | 0.992789 | 1.03791  | 0.18627  |
| SNORD27  | 1.021891 | 0.965736 | 1.08131  | 0.452692 |
| MIR2278  | 1.026892 | 0.983585 | 1.072105 | 0.227405 |
| RNY4     | 1.038697 | 0.976434 | 1.104931 | 0.228657 |
| SCARNA20 | 1.037608 | 0.979926 | 1.098686 | 0.205844 |
| MIR2276  | 0.993767 | 0.955417 | 1.033656 | 0.755492 |
| SCARNA14 | 1.07492  | 0.997372 | 1.158498 | 0.058614 |
| SCARNA21 | 1.046049 | 1.020428 | 1.072314 | 0.000373 |
| SCARNA3  | 1.013879 | 0.97284  | 1.056649 | 0.513229 |
| SCARNA1  | 1.039689 | 0.992091 | 1.08957  | 0.103551 |
| MIR2116  | 1.082377 | 1.028624 | 1.13894  | 0.00232  |
| PCDHGA1  | 0.977585 | 0.888236 | 1.075922 | 0.642959 |
| HOXA10   | 1.159087 | 1.122658 | 1.196697 | 1.29E-19 |
| TMEM200  | 0.932336 | 0.810799 | 1.072091 | 0.325535 |
| PCDHGB6  | 0.985827 | 0.889454 | 1.092642 | 0.785656 |
| SERPINE3 | 0.981587 | 0.897843 | 1.073143 | 0.682939 |
| TUG1     | 1.056091 | 0.968881 | 1.151152 | 0.214588 |
| TRNP1    | 1.074381 | 0.995778 | 1.159189 | 0.064196 |
| PCDHGA5  | 0.975219 | 0.883082 | 1.076968 | 0.620194 |
| NACA2    | 0.966389 | 0.886138 | 1.053907 | 0.439555 |
| PCDHGA7  | 0.93198  | 0.854196 | 1.016846 | 0.113135 |
| RNF5P1   | 1.038687 | 0.962886 | 1.120456 | 0.326219 |

|          |          |          |          |          |
|----------|----------|----------|----------|----------|
| SLC10A5  | 0.930428 | 0.859383 | 1.007346 | 0.075183 |
| EIF5A11  | 1.044695 | 0.930081 | 1.173433 | 0.46084  |
| ALG11    | 1.080065 | 0.988236 | 1.180428 | 0.089332 |
| PRKDC    | 1.06613  | 1.006218 | 1.129609 | 0.030004 |
| PCDHGA6  | 0.925572 | 0.855682 | 1.001169 | 0.053509 |
| PCDHGA8  | 0.942981 | 0.837242 | 1.062073 | 0.333287 |
| PCDHGA1  | 1.01548  | 0.930347 | 1.108403 | 0.730952 |
| PCDHGA1  | 0.938567 | 0.858881 | 1.025645 | 0.161337 |
| PCDHGB2  | 0.958965 | 0.903053 | 1.018338 | 0.171604 |
| PCDHGB4  | 0.895952 | 0.797083 | 1.007085 | 0.06553  |
| CLDN23   | 1.172339 | 1.085927 | 1.265627 | 4.70E-05 |
| ZNF260   | 1.031575 | 0.948067 | 1.122438 | 0.470445 |
| LYN      | 0.948939 | 0.877294 | 1.026434 | 0.190685 |
| PINX1    | 1.202482 | 1.076225 | 1.34355  | 0.001122 |
| PCDHGB7  | 0.938931 | 0.861116 | 1.023779 | 0.153419 |
| SIGLEC14 | 1.019084 | 0.974296 | 1.065932 | 0.40972  |
| CHMP4A   | 1.106033 | 0.988165 | 1.237961 | 0.079621 |
| SIGLEC12 | 1.070129 | 1.024603 | 1.117678 | 0.002245 |
| FLJ20021 | 0.868201 | 0.788489 | 0.955971 | 0.004023 |
| PABPC4L  | 1.042354 | 0.956331 | 1.136115 | 0.345208 |
| OMP      | 1.331633 | 1.195334 | 1.483474 | 2.01E-07 |
| FPGT     | 1.173371 | 1.081618 | 1.272908 | 0.000119 |
| MEX3A    | 1.044607 | 0.979689 | 1.113827 | 0.182493 |
| SLC22A18 | 1.293919 | 1.115112 | 1.501397 | 0.000684 |
| MPV17L2  | 1.111661 | 1.016221 | 1.216064 | 0.020817 |
| SCARNA9  | 1.043475 | 0.980537 | 1.110452 | 0.180006 |
| DPP3     | 1.082222 | 1.001708 | 1.169208 | 0.045152 |
| ANKHD1-1 | 1.000164 | 0.91188  | 1.096995 | 0.99723  |
| KRTAP5-9 | 0.956298 | 0.860403 | 1.06288  | 0.407194 |
| CHMP1B   | 1.072234 | 0.972597 | 1.182077 | 0.161039 |
| EID3     | 0.942801 | 0.893426 | 0.994904 | 0.031865 |
| SNHG9    | 1.013926 | 0.967652 | 1.062412 | 0.561732 |
| CARD17   | 1.090152 | 0.96162  | 1.235863 | 0.177487 |
| EID1     | 1.178728 | 1.088928 | 1.275932 | 4.76E-05 |
| TAS2R43  | 0.994425 | 0.940495 | 1.051448 | 0.844205 |
| LY6G6E   | 1.097626 | 1.001978 | 1.202404 | 0.045236 |
| FDXACB1  | 1.25469  | 1.089984 | 1.444283 | 0.001578 |
| SNHG1    | 0.931662 | 0.864209 | 1.004379 | 0.06489  |
| TIFAB    | 1.034564 | 0.98115  | 1.090885 | 0.208987 |
| CYP2A6   | 0.987262 | 0.913153 | 1.067386 | 0.747454 |
| CTSO     | 1.016076 | 0.947783 | 1.089289 | 0.65326  |
| ZNF432   | 1.071403 | 0.990813 | 1.158548 | 0.083872 |
| TAS2R30  | 0.996192 | 0.949987 | 1.044644 | 0.874879 |
| ZNF10    | 0.952481 | 0.886061 | 1.02388  | 0.186811 |
| ZNF486   | 0.911981 | 0.857668 | 0.969734 | 0.003272 |
| HMBS     | 1.03721  | 0.987553 | 1.089364 | 0.144405 |
| ZNF225   | 1.229527 | 1.09802  | 1.376785 | 0.000343 |
| TAS2R31  | 1.004464 | 0.953418 | 1.058244 | 0.867069 |
| POLG2    | 1.009874 | 0.939258 | 1.0858   | 0.790499 |
| CLEC12B  | 0.980141 | 0.912535 | 1.052756 | 0.582264 |
| ZNF350   | 1.06104  | 0.971006 | 1.159423 | 0.190324 |
| ZNF253   | 1.011436 | 0.938914 | 1.08956  | 0.764521 |
| CAPNS2   | 1.039652 | 0.962745 | 1.122701 | 0.321342 |
| HP       | 0.961109 | 0.913407 | 1.011302 | 0.1267   |
| LSM14A   | 0.930148 | 0.84904  | 1.019005 | 0.119819 |
| NHLRC4   | 0.972546 | 0.904043 | 1.04624  | 0.45507  |
| GATC     | 1.001578 | 0.925396 | 1.084033 | 0.968836 |
| MGAM     | 0.998554 | 0.960968 | 1.037609 | 0.941054 |

|          |          |          |          |          |
|----------|----------|----------|----------|----------|
| FNTB     | 0.977325 | 0.904721 | 1.055755 | 0.560322 |
| ZNF878   | 0.939229 | 0.882457 | 0.999654 | 0.048741 |
| CNPY2    | 1.219311 | 1.085969 | 1.369025 | 0.000792 |
| MRS2P2   | 0.974884 | 0.926542 | 1.025748 | 0.326954 |
| CUX1     | 0.88115  | 0.81392  | 0.953933 | 0.00178  |
| MAP1LC3E | 1.06949  | 0.97511  | 1.173005 | 0.154084 |
| CLEC5A   | 0.900164 | 0.865141 | 0.936606 | 2.05E-07 |
| CHURC1   | 1.091329 | 1.007277 | 1.182394 | 0.032575 |
| RTKL1    | 1.260996 | 1.107742 | 1.435452 | 0.000452 |
| PDF      | 0.959641 | 0.861068 | 1.069499 | 0.456302 |
| SPESP1   | 0.987877 | 0.905262 | 1.078032 | 0.78429  |
| MC1R     | 0.94414  | 0.860135 | 1.036349 | 0.226661 |
| TUBB3    | 0.869445 | 0.769745 | 0.982058 | 0.024366 |
| ITGB3    | 1.123542 | 1.084877 | 1.163585 | 7.06E-11 |
| THTPA    | 1.103255 | 1.003677 | 1.212713 | 0.04175  |
| MRPL46   | 1.533265 | 1.331912 | 1.765058 | 2.68E-09 |
| TYRO3P   | 0.985431 | 0.927272 | 1.047237 | 0.636316 |
| RBM15B   | 0.927731 | 0.858618 | 1.002407 | 0.057552 |
| HOXB7    | 1.131484 | 1.080807 | 1.184537 | 1.27E-07 |
| MRC1     | 1.031734 | 0.987915 | 1.077497 | 0.158281 |
| HSPB9    | 1.017846 | 0.948583 | 1.092167 | 0.62276  |
| MT1L     | 1.134489 | 1.064564 | 1.209006 | 0.000101 |
| CCPG1    | 0.999094 | 0.92008  | 1.084894 | 0.982799 |
| EPPK1    | 1.017823 | 0.923075 | 1.122297 | 0.723065 |
| BOP1     | 1.078808 | 1.000574 | 1.163159 | 0.048278 |
| FIGNL2   | 1.24372  | 1.117637 | 1.384026 | 6.35E-05 |
| PECAM1   | 1.150295 | 1.083566 | 1.221134 | 4.39E-06 |
| UBE2MP1  | 0.821096 | 0.733973 | 0.918561 | 0.000573 |
| GAN      | 1.080722 | 0.996068 | 1.17257  | 0.06214  |
| HPR      | 1.112607 | 0.979292 | 1.26407  | 0.101292 |
| PCDHGA9  | 0.966543 | 0.876051 | 1.066382 | 0.497461 |
| PCDHGB3  | 0.91951  | 0.858107 | 0.985308 | 0.017326 |
| CORO7    | 1.045296 | 0.955151 | 1.143948 | 0.335677 |
| SPON1    | 1.108436 | 1.035177 | 1.186878 | 0.003168 |
| MRPL12   | 1.126903 | 1.023384 | 1.240894 | 0.015094 |
| ALOX12P2 | 1.018818 | 0.966958 | 1.073459 | 0.484291 |
| GTF2I    | 0.964816 | 0.891489 | 1.044174 | 0.374473 |
| ZNF234   | 1.121425 | 1.037403 | 1.212253 | 0.003926 |
| IKBKE    | 0.98225  | 0.920135 | 1.048558 | 0.591039 |
| SNORD43  | 0.998599 | 0.914376 | 1.090578 | 0.975112 |
| SNORD3A  | 1.022644 | 0.984061 | 1.062739 | 0.253817 |
| NBPF11   | 1.04436  | 0.964072 | 1.131334 | 0.28757  |
| RNU4ATA  | 1.004244 | 0.962037 | 1.048303 | 0.846709 |
| DYNLL2   | 0.943156 | 0.858462 | 1.036206 | 0.222806 |
| OTUD7B   | 1.054695 | 0.974714 | 1.141239 | 0.185685 |
| DPRXP4   | 1.013574 | 0.944735 | 1.087429 | 0.707131 |
| SNORD3C  | 1.027629 | 0.993455 | 1.062979 | 0.114238 |
| SNORD92  | 1.014901 | 0.970192 | 1.061671 | 0.519905 |
| SNORD53  | 0.97127  | 0.926373 | 1.018343 | 0.227355 |
| ANXA8    | 0.801806 | 0.718531 | 0.894733 | 7.88E-05 |
| RBM8A    | 1.155965 | 1.024696 | 1.30405  | 0.018441 |
| ARGFXP2  | 0.961029 | 0.908441 | 1.016662 | 0.166222 |
| TIMM23   | 1.067763 | 0.963824 | 1.182911 | 0.209552 |
| RNF115   | 0.924981 | 0.847963 | 1.008995 | 0.078733 |
| RPL17    | 1.017445 | 0.923802 | 1.120581 | 0.725531 |
| SEC22B   | 1.116552 | 1.021041 | 1.220996 | 0.015676 |
| FSBP     | 1.26084  | 1.097628 | 1.448321 | 0.001049 |
| TXNIP    | 0.93633  | 0.886472 | 0.988992 | 0.018451 |

|          |          |          |          |          |
|----------|----------|----------|----------|----------|
| SRGAP2   | 1.101448 | 1.025352 | 1.183192 | 0.00816  |
| BAHCC1   | 1.058229 | 1.015833 | 1.102395 | 0.006669 |
| RASSF5   | 0.998197 | 0.930429 | 1.070901 | 0.959876 |
| STRADA   | 0.964593 | 0.900077 | 1.033733 | 0.307427 |
| MIR744   | 0.968608 | 0.919416 | 1.020432 | 0.230383 |
| NBPF15   | 1.071448 | 0.984128 | 1.166516 | 0.111592 |
| NCOA4    | 0.956821 | 0.889772 | 1.028922 | 0.233737 |
| MRPS21   | 1.128539 | 1.015626 | 1.254004 | 0.02456  |
| GDF10    | 1.252261 | 1.149544 | 1.364156 | 2.58E-07 |
| MYO15B   | 0.959242 | 0.905768 | 1.015873 | 0.155072 |
| AARSD1   | 1.144428 | 1.025633 | 1.276983 | 0.015839 |
| MIR212   | 1.030345 | 0.96664  | 1.098248 | 0.358613 |
| MIR132   | 1.030903 | 0.960767 | 1.10616  | 0.397204 |
| LCN6     | 0.840104 | 0.76644  | 0.920848 | 0.000198 |
| S1PR2    | 1.138436 | 1.063249 | 1.218939 | 0.0002   |
| ZNF224   | 1.126266 | 1.029037 | 1.232682 | 0.009841 |
| LIN37    | 1.031805 | 0.869936 | 1.223793 | 0.71914  |
| NDUFA7   | 1.035657 | 0.957388 | 1.120325 | 0.382196 |
| NBPF12   | 1.016843 | 0.94573  | 1.093304 | 0.651604 |
| CLEC4GP1 | 1.204402 | 1.119762 | 1.29544  | 5.66E-07 |
| CT45A1   | 1.082536 | 1.023418 | 1.14507  | 0.005643 |
| MAGIX    | 1.227456 | 1.092101 | 1.379587 | 0.000586 |
| IKBK     | 1.064548 | 0.960597 | 1.179747 | 0.232812 |
| SPIB     | 1.021472 | 0.952991 | 1.094875 | 0.548478 |
| TMEM185  | 0.98406  | 0.880877 | 1.099329 | 0.776164 |
| NBPF9    | 1.085451 | 0.991193 | 1.188672 | 0.076876 |
| KCNQ1OT  | 1.038595 | 0.974455 | 1.106957 | 0.244285 |
| EGLN2    | 1.002951 | 0.947017 | 1.062189 | 0.919834 |
| SNHG8    | 0.865134 | 0.797799 | 0.938153 | 0.000458 |
| TERC     | 1.156533 | 1.043876 | 1.281348 | 0.005416 |
| NBPF8    | 1.010059 | 0.948832 | 1.075237 | 0.753746 |
| NBPF14   | 1.025233 | 0.943197 | 1.114404 | 0.558123 |
| TAF15    | 0.963415 | 0.885811 | 1.047818 | 0.384394 |
| RASL10B  | 1.149138 | 1.002857 | 1.316757 | 0.045388 |
| SRXN1    | 1.204522 | 1.040338 | 1.394617 | 0.012814 |
| NBPF10   | 1.022192 | 0.932764 | 1.120192 | 0.638435 |
| MMP28    | 0.845967 | 0.790723 | 0.90507  | 1.21E-06 |
| CCL5     | 1.03567  | 0.988238 | 1.085379 | 0.142839 |
| LIX1L    | 1.04796  | 0.965919 | 1.13697  | 0.260046 |
| SNORD111 | 1.014596 | 0.966494 | 1.065092 | 0.558725 |
| MIR98    | 1.037522 | 0.979379 | 1.099117 | 0.210623 |
| ANKRD34  | 1.069496 | 0.941717 | 1.214612 | 0.300692 |
| SNORD14  | 1.053244 | 0.983631 | 1.127784 | 0.13704  |
| MIR139   | 0.949829 | 0.872924 | 1.03351  | 0.232148 |
| GTF2H5   | 1.215298 | 1.074345 | 1.374744 | 0.001935 |
| NUDT3    | 0.576201 | 0.474375 | 0.699885 | 2.75E-08 |
| POM121C  | 0.894827 | 0.821617 | 0.974561 | 0.010722 |
| CD24     | 0.995165 | 0.965254 | 1.026003 | 0.755588 |
| SNORA28  | 1.01464  | 0.976777 | 1.05397  | 0.453848 |
| ZNF595   | 1.034158 | 0.980884 | 1.090326 | 0.213241 |
| DOC2B    | 0.887505 | 0.841778 | 0.935715 | 9.79E-06 |
| MESTIT1  | 0.839478 | 0.750385 | 0.93915  | 0.002238 |
| DCP1A    | 0.909695 | 0.853754 | 0.9693   | 0.003468 |
| FAM106A  | 1.107404 | 1.030662 | 1.18986  | 0.005366 |
| SNURF    | 1.047775 | 0.969943 | 1.131852 | 0.236007 |
| DGCR11   | 1.088455 | 1.005468 | 1.178291 | 0.036195 |
| ZNHIT3   | 1.272979 | 1.103711 | 1.468207 | 0.000915 |
| CYFIP1   | 1.044827 | 0.982302 | 1.111332 | 0.163674 |

|          |          |          |          |          |
|----------|----------|----------|----------|----------|
| USP27X   | 1.22369  | 1.113968 | 1.34422  | 2.53E-05 |
| TAF9     | 0.967922 | 0.87227  | 1.074062 | 0.539119 |
| NOL12    | 1.178211 | 1.080245 | 1.28506  | 0.000213 |
| ANTXRL   | 1.132226 | 0.987871 | 1.297675 | 0.074326 |
| SOCS7    | 1.009276 | 0.937438 | 1.086618 | 0.806396 |
| ADRA2B   | 0.896803 | 0.818842 | 0.982187 | 0.018909 |
| ZNF658   | 1.398123 | 1.253146 | 1.559873 | 1.97E-09 |
| SEBOX    | 1.115453 | 0.965976 | 1.288061 | 0.136643 |
| PI4KAP1  | 1.020468 | 0.961551 | 1.082994 | 0.504283 |
| CCL23    | 1.062516 | 1.028886 | 1.097245 | 0.00022  |
| RNU11    | 1.031677 | 0.979398 | 1.086746 | 0.239849 |
| ZNF280B  | 1.147317 | 1.044289 | 1.260509 | 0.004201 |
| MLLT6    | 1.114358 | 1.02469  | 1.211871 | 0.011412 |
| NUDT18   | 1.096299 | 1.017616 | 1.181066 | 0.015541 |
| SNORD91I | 1.125408 | 1.040841 | 1.216846 | 0.003034 |
| ZNF2     | 1.153105 | 1.041393 | 1.2768   | 0.006142 |
| LENG9    | 1.00999  | 0.934387 | 1.091709 | 0.80228  |
| CCL4     | 1.116387 | 1.064511 | 1.17079  | 5.76E-06 |
| MIR1299  | 1.002416 | 0.964179 | 1.042169 | 0.903216 |
| CCL18    | 1.027369 | 0.924669 | 1.141475 | 0.615331 |
| FCGBP    | 0.973888 | 0.891489 | 1.063904 | 0.55747  |
| XKR5     | 1.188655 | 1.052737 | 1.342122 | 0.005279 |
| MT1IP    | 0.97638  | 0.845892 | 1.126996 | 0.743986 |
| AATF     | 1.067487 | 0.948564 | 1.20132  | 0.278497 |
| ARHGAP2I | 0.918045 | 0.86334  | 0.976217 | 0.006375 |
| TUBGCP5  | 1.116595 | 1.031028 | 1.209264 | 0.006706 |
| PRSS2    | 1.229069 | 1.1786   | 1.281699 | 5.35E-22 |
| DUSP14   | 1.003622 | 0.930458 | 1.082538 | 0.925418 |
| UHRF1    | 1.020969 | 0.967309 | 1.077606 | 0.451233 |
| ORAI1    | 0.990896 | 0.919304 | 1.068062 | 0.811076 |
| CCL4L2   | 1.095456 | 1.047429 | 1.145686 | 6.73E-05 |
| CCL3L3   | 1.064738 | 1.025656 | 1.105309 | 0.00101  |
| RN7SL1   | 1.017887 | 0.995499 | 1.040778 | 0.11819  |
| PIK3R6   | 0.969397 | 0.912742 | 1.029568 | 0.311739 |
| TADA2A   | 1.101658 | 1.013023 | 1.198048 | 0.023679 |
| PIP4K2B  | 1.069502 | 0.998822 | 1.145184 | 0.054082 |
| PCDHGB5  | 0.974542 | 0.884555 | 1.073683 | 0.601882 |
| HERC2P2  | 1.064455 | 1.009064 | 1.122887 | 0.021968 |
| RAB7B    | 0.957    | 0.916449 | 0.999344 | 0.046628 |
| DACH1    | 1.03916  | 1.003734 | 1.075837 | 0.029964 |
| PADI6    | 1.083335 | 0.972564 | 1.206723 | 0.145819 |
| GTF2IP1  | 0.962086 | 0.855271 | 1.08224  | 0.519758 |
| STAG3L2  | 0.949083 | 0.892469 | 1.009287 | 0.09584  |
| TYW1B    | 0.985423 | 0.917517 | 1.058355 | 0.686878 |
| F8A3     | 0.887635 | 0.741864 | 1.062049 | 0.192829 |
| PIGW     | 1.163695 | 1.061256 | 1.276022 | 0.001262 |
| F8A1     | 0.982862 | 0.915227 | 1.055496 | 0.634647 |
| PCGF2    | 1.300035 | 1.205042 | 1.402515 | 1.22E-11 |
| MARCKS   | 1.096296 | 1.056642 | 1.137438 | 1.00E-06 |
| ZNF670   | 1.075728 | 0.976272 | 1.185316 | 0.140267 |
| PKD1L3   | 1.087941 | 0.994283 | 1.190422 | 0.066486 |
| CCL3     | 1.084977 | 1.03361  | 1.138896 | 0.000981 |
| PGM5P2   | 0.986511 | 0.91993  | 1.057912 | 0.703266 |
| PSMB3    | 1.248083 | 1.124834 | 1.384836 | 2.95E-05 |
| CISD3    | 1.275576 | 1.158746 | 1.404186 | 6.83E-07 |
| RDM1     | 1.547885 | 1.37803  | 1.738676 | 1.75E-13 |
| DDX52    | 1.006713 | 0.932384 | 1.086968 | 0.864247 |
| ZNF8     | 0.968538 | 0.905336 | 1.036152 | 0.35316  |

|          |          |          |          |          |
|----------|----------|----------|----------|----------|
| SSTR3    | 1.031868 | 0.92065  | 1.156521 | 0.589801 |
| MYO19    | 1.112212 | 1.021416 | 1.21108  | 0.014379 |
| GGNBP2   | 0.957955 | 0.880566 | 1.042145 | 0.317578 |
| ZNF229   | 1.103058 | 0.99338  | 1.224844 | 0.066408 |
| DHRS11   | 1.005766 | 0.938659 | 1.07767  | 0.870377 |
| ACACA    | 1.000968 | 0.939156 | 1.066847 | 0.976276 |
| TMEM191  | 1.088826 | 0.959321 | 1.235813 | 0.187781 |
| NR2E3    | 1.050929 | 0.925454 | 1.193417 | 0.443833 |
| MRM1     | 1.068018 | 1.002059 | 1.138319 | 0.043052 |
| MRPL45   | 0.887916 | 0.814714 | 0.967696 | 0.006769 |
| OR2L8    | 1.10746  | 1.020258 | 1.202115 | 0.014718 |
| FLJ42393 | 0.987693 | 0.927916 | 1.051321 | 0.69746  |
| TMEM75   | 1.032367 | 0.963635 | 1.106001 | 0.364846 |
| PLAC4    | 1.062306 | 0.983655 | 1.147246 | 0.123546 |
| SNHG4    | 0.902912 | 0.844383 | 0.965499 | 0.00282  |
| HSP90AB4 | 0.989092 | 0.928853 | 1.053238 | 0.732276 |
| WASH5P   | 1.006756 | 0.885081 | 1.145157 | 0.918398 |
| ADORA3   | 0.834268 | 0.707039 | 0.984391 | 0.031848 |
| HYMAI    | 0.930236 | 0.859473 | 1.006825 | 0.073219 |
| MIR1322  | 1.029165 | 0.98462  | 1.075725 | 0.202874 |
| MIR1910  | 1.020785 | 0.972944 | 1.070979 | 0.400914 |
| SNORD98  | 0.985055 | 0.914207 | 1.061394 | 0.692559 |
| MIR924   | 1.068114 | 0.983101 | 1.160479 | 0.119425 |
| EXOC3L2  | 1.043332 | 0.989938 | 1.099607 | 0.1135   |
| MIR555   | 1.155458 | 1.064783 | 1.253855 | 0.00053  |
| MIR130B  | 0.890152 | 0.816913 | 0.969956 | 0.0079   |
| MIR628   | 0.984669 | 0.93218  | 1.040114 | 0.580422 |
| MIR1281  | 0.99428  | 0.936292 | 1.05586  | 0.851587 |
| MIR29A   | 0.989046 | 0.935831 | 1.045286 | 0.696271 |
| SCO2     | 1.042743 | 0.952948 | 1.141    | 0.362301 |
| MIR718   | 0.999117 | 0.941893 | 1.059817 | 0.97657  |
| TBCE     | 1.033265 | 0.91358  | 1.16863  | 0.602375 |
| ARHGAP1  | 1.0374   | 0.951608 | 1.130927 | 0.404445 |
| TOP1P1   | 1.042798 | 0.925815 | 1.174562 | 0.490008 |
| NPBWR1   | 1.101023 | 0.99507  | 1.218259 | 0.06229  |



## Supplementary file 3. Results of univariate Cox regression analysis in TCGA-LAML

| id       | HR       | HR.95L   | HR.95H   | pvalue   |
|----------|----------|----------|----------|----------|
| TSPAN6   | 1.308024 | 0.919863 | 1.85998  | 0.134934 |
| DPM1     | 1.172525 | 0.606693 | 2.266082 | 0.635898 |
| SCYL3    | 0.989455 | 0.596158 | 1.642218 | 0.967289 |
| FGR      | 1.193546 | 1.06726  | 1.334776 | 0.00193  |
| CFH      | 1.03815  | 0.89135  | 1.209127 | 0.630287 |
| FUCA2    | 1.174529 | 0.806424 | 1.710662 | 0.401738 |
| GCLC     | 1.384228 | 0.985245 | 1.944783 | 0.060893 |
| NFYA     | 0.644811 | 0.462227 | 0.899517 | 0.009782 |
| LAS1L    | 0.982545 | 0.637264 | 1.514905 | 0.936465 |
| ENPP4    | 1.275568 | 1.038335 | 1.567002 | 0.020434 |
| SEMA3F   | 1.01047  | 0.750738 | 1.360059 | 0.945224 |
| ANKIB1   | 0.667029 | 0.444891 | 1.000083 | 0.050047 |
| CYP51A1  | 1.375975 | 0.749159 | 2.527244 | 0.303519 |
| KRIT1    | 0.475548 | 0.275084 | 0.822098 | 0.007782 |
| RAD52    | 0.857186 | 0.521834 | 1.408049 | 0.542817 |
| BAD      | 1.733881 | 1.040857 | 2.888335 | 0.034536 |
| LAP3     | 1.529674 | 1.141949 | 2.049042 | 0.004373 |
| CD99     | 0.798002 | 0.612203 | 1.04019  | 0.095199 |
| HS3ST1   | 1.052227 | 0.814456 | 1.359412 | 0.696872 |
| MAD1L1   | 0.757041 | 0.454855 | 1.259987 | 0.284238 |
| LASP1    | 1.417485 | 0.839442 | 2.393571 | 0.191823 |
| SNX11    | 1.488601 | 0.960261 | 2.307637 | 0.075294 |
| TMEM176  | 0.988252 | 0.871848 | 1.120199 | 0.853375 |
| M6PR     | 0.976399 | 0.57892  | 1.646781 | 0.92864  |
| KLHL13   | 0.973209 | 0.816041 | 1.160647 | 0.762508 |
| ICA1     | 1.011627 | 0.854395 | 1.197794 | 0.893298 |
| DBNDD1   | 0.858823 | 0.630125 | 1.170525 | 0.335379 |
| ALS2     | 0.721027 | 0.575179 | 0.903859 | 0.00456  |
| CASP10   | 1.713509 | 1.147327 | 2.559091 | 0.0085   |
| CFLAR    | 1.003017 | 0.660818 | 1.52242  | 0.98871  |
| TFPI     | 1.066773 | 0.906434 | 1.255474 | 0.436674 |
| RBM5     | 0.862391 | 0.549399 | 1.353694 | 0.519868 |
| MTMR7    | 0.539141 | 0.361944 | 0.803087 | 0.002377 |
| SLC7A2   | 0.910097 | 0.643776 | 1.286593 | 0.593813 |
| ARF5     | 1.208865 | 0.819371 | 1.783509 | 0.339097 |
| SARM1    | 1.345895 | 1.018075 | 1.779273 | 0.037002 |
| POLDIP2  | 2.572155 | 1.335496 | 4.95395  | 0.004727 |
| PLXND1   | 1.059395 | 0.811101 | 1.383696 | 0.67197  |
| AK2      | 1.46612  | 1.054894 | 2.037653 | 0.022717 |
| CD38     | 0.967887 | 0.803026 | 1.166594 | 0.731901 |
| FKBP4    | 0.982245 | 0.749266 | 1.287667 | 0.896815 |
| RBM6     | 0.784236 | 0.435201 | 1.413199 | 0.418574 |
| CAMKK1   | 1.148464 | 0.841603 | 1.567213 | 0.382808 |
| RECQL    | 1.057716 | 0.739198 | 1.513483 | 0.758887 |
| HSPB6    | 1.176226 | 0.81279  | 1.702173 | 0.389382 |
| NDUFAB1  | 1.490506 | 0.844864 | 2.629546 | 0.168221 |
| PK4      | 1.146207 | 1.009031 | 1.302032 | 0.035887 |
| SLC22A16 | 0.729984 | 0.575173 | 0.926462 | 0.009652 |
| ZMYND10  | 0.992281 | 0.700013 | 1.406578 | 0.965281 |
| SLC25A13 | 0.747685 | 0.483508 | 1.156203 | 0.191085 |
| ST7      | 1.081429 | 0.864297 | 1.353109 | 0.493601 |
| CDC27    | 0.770268 | 0.500439 | 1.185585 | 0.235515 |
| SLC4A1   | 0.905971 | 0.820559 | 1.000275 | 0.05064  |
| HCCS     | 2.002266 | 1.197059 | 3.349097 | 0.008162 |
| DVL2     | 1.030984 | 0.69516  | 1.529041 | 0.879392 |
| UPF1     | 1.759156 | 1.137902 | 2.719591 | 0.011048 |

|          |          |          |          |          |
|----------|----------|----------|----------|----------|
| SKAP2    | 1.170731 | 0.994339 | 1.378413 | 0.058513 |
| SLC25A5  | 1.402847 | 0.910235 | 2.162056 | 0.125078 |
| HOXA11   | 1.096112 | 0.941566 | 1.276024 | 0.236624 |
| POLR2J   | 1.425908 | 0.85599  | 2.375278 | 0.172965 |
| DHX33    | 0.764036 | 0.512005 | 1.140125 | 0.187555 |
| THSD7A   | 0.963904 | 0.833298 | 1.114979 | 0.620676 |
| LIG3     | 0.563919 | 0.372847 | 0.852908 | 0.006654 |
| RPAP3    | 1.079239 | 0.674197 | 1.727622 | 0.750737 |
| ACSM3    | 0.811364 | 0.70375  | 0.935433 | 0.003985 |
| CIAPIN1  | 1.811119 | 0.990923 | 3.310198 | 0.053566 |
| SPPL2B   | 0.909541 | 0.709505 | 1.165974 | 0.454332 |
| COPZ2    | 1.122538 | 0.900984 | 1.398571 | 0.302795 |
| PRKAR2B  | 1.20174  | 1.031589 | 1.399955 | 0.018313 |
| MSL3     | 1.41666  | 0.909662 | 2.206232 | 0.123306 |
| CREBBP   | 0.977678 | 0.628508 | 1.52083  | 0.920231 |
| MPO      | 0.877387 | 0.818684 | 0.940298 | 0.000214 |
| WDR54    | 1.458565 | 1.043484 | 2.03876  | 0.027169 |
| CROT     | 0.893476 | 0.61418  | 1.299781 | 0.555886 |
| ABCB4    | 1.286943 | 0.741975 | 2.23218  | 0.369281 |
| RHBDD2   | 1.127246 | 0.854149 | 1.487661 | 0.397441 |
| IBTK     | 0.687311 | 0.449564 | 1.050787 | 0.083409 |
| ZNF195   | 0.656385 | 0.48289  | 0.892213 | 0.007184 |
| MYCBP2   | 0.927629 | 0.654858 | 1.314018 | 0.67241  |
| FBXL3    | 0.901655 | 0.552859 | 1.470503 | 0.678269 |
| ITGAL    | 1.433612 | 1.167971 | 1.759669 | 0.000571 |
| PKD2     | 1.191421 | 0.870212 | 1.631191 | 0.274535 |
| ITGA3    | 1.088823 | 0.820365 | 1.445131 | 0.555766 |
| ZFX      | 0.873263 | 0.558715 | 1.364897 | 0.552014 |
| LAMP2    | 0.646447 | 0.39518  | 1.057477 | 0.082317 |
| ITGA2B   | 1.074775 | 0.935185 | 1.235199 | 0.309672 |
| GDE1     | 1.1988   | 0.684604 | 2.099201 | 0.525856 |
| CRLF1    | 1.057127 | 0.524977 | 2.128698 | 0.876379 |
| OSBPL7   | 1.187032 | 0.794771 | 1.772895 | 0.402202 |
| TMEM98   | 0.933823 | 0.682204 | 1.278247 | 0.669066 |
| YBX2     | 0.854811 | 0.554546 | 1.317659 | 0.477375 |
| MAP3K14  | 1.453573 | 1.045284 | 2.021339 | 0.026201 |
| TMEM132  | 1.136206 | 0.791577 | 1.630877 | 0.488639 |
| AP2B1    | 1.068456 | 0.697301 | 1.637167 | 0.761048 |
| ZNF263   | 1.016612 | 0.562223 | 1.838238 | 0.956524 |
| SPATA20  | 1.267853 | 0.973942 | 1.65046  | 0.077776 |
| TNFRSF12 | 0.992469 | 0.780786 | 1.261543 | 0.950754 |
| MAP3K9   | 1.244809 | 0.884444 | 1.752005 | 0.209197 |
| RALA     | 0.832632 | 0.560426 | 1.23705  | 0.364515 |
| BAIAP2L1 | 0.744994 | 0.515692 | 1.076255 | 0.116781 |
| AGK      | 0.787886 | 0.462051 | 1.343495 | 0.381275 |
| ALDH3B1  | 1.173511 | 0.940428 | 1.464363 | 0.156691 |
| TTC22    | 1.266061 | 0.948149 | 1.690568 | 0.109806 |
| PHTF2    | 1.121308 | 0.756242 | 1.662605 | 0.568866 |
| FARP2    | 1.563409 | 1.041606 | 2.346613 | 0.031029 |
| GGCT     | 1.164362 | 0.756751 | 1.791525 | 0.488827 |
| DBF4     | 0.762519 | 0.472556 | 1.230405 | 0.266731 |
| TBXA2R   | 1.163004 | 1.002441 | 1.349285 | 0.046357 |
| IFRD1    | 0.701174 | 0.495584 | 0.992053 | 0.04496  |
| COX10    | 1.147154 | 0.619069 | 2.12571  | 0.662675 |
| GTF2IRD1 | 0.914521 | 0.702911 | 1.189837 | 0.505751 |
| PAF1     | 2.550544 | 1.218606 | 5.338288 | 0.012969 |
| VPS41    | 1.015119 | 0.660499 | 1.560133 | 0.94544  |
| ELAC2    | 1.574458 | 0.932918 | 2.657164 | 0.089147 |

|          |          |          |          |          |
|----------|----------|----------|----------|----------|
| ARSD     | 0.995799 | 0.763977 | 1.297966 | 0.975163 |
| PNPLA4   | 1.475556 | 0.970158 | 2.244239 | 0.06901  |
| ADIPOR2  | 1.237789 | 0.742299 | 2.064022 | 0.413531 |
| CDKL3    | 0.497874 | 0.236043 | 1.050144 | 0.06703  |
| PRSS21   | 0.98683  | 0.915906 | 1.063246 | 0.727551 |
| MARK4    | 0.920525 | 0.560728 | 1.511188 | 0.743346 |
| PROM1    | 1.036318 | 0.953743 | 1.126043 | 0.399758 |
| CCDC124  | 1.950503 | 1.36656  | 2.783969 | 0.000233 |
| CEACAM2  | 1.440663 | 1.129655 | 1.837296 | 0.003256 |
| PAFAH1B1 | 0.725104 | 0.402555 | 1.306099 | 0.284366 |
| KIAA0100 | 0.986715 | 0.680702 | 1.430299 | 0.943714 |
| GAS7     | 1.104335 | 0.911223 | 1.338373 | 0.311549 |
| TRAPPC6A | 0.995042 | 0.718846 | 1.377358 | 0.976097 |
| MATK     | 0.934653 | 0.741437 | 1.178221 | 0.56736  |
| CD79B    | 1.391767 | 1.10339  | 1.755514 | 0.005263 |
| SCN4A    | 1.526465 | 1.094368 | 2.129169 | 0.012735 |
| ST7L     | 0.76093  | 0.412515 | 1.403621 | 0.381793 |
| TKTL1    | 1.217282 | 0.944067 | 1.569566 | 0.129485 |
| RPUSD1   | 1.491871 | 1.038851 | 2.142443 | 0.030282 |
| RHBDF1   | 1.130884 | 0.955203 | 1.338875 | 0.153318 |
| LUC7L    | 0.569826 | 0.329231 | 0.986243 | 0.044489 |
| CACNA2D  | 0.929748 | 0.749302 | 1.153648 | 0.508188 |
| BAIAP3   | 1.166909 | 0.955694 | 1.424805 | 0.129736 |
| PIGQ     | 0.953149 | 0.702891 | 1.29251  | 0.757486 |
| TEAD3    | 0.989476 | 0.718725 | 1.362221 | 0.948283 |
| DNAJC11  | 1.243078 | 0.686708 | 2.250217 | 0.47236  |
| MYLIP    | 0.993429 | 0.704662 | 1.400532 | 0.96999  |
| E2F2     | 1.128949 | 0.880044 | 1.448252 | 0.339869 |
| PSMB1    | 1.784095 | 0.968496 | 3.286533 | 0.063273 |
| SYN1     | 0.856001 | 0.6026   | 1.21596  | 0.385301 |
| JARID2   | 0.589817 | 0.364231 | 0.95512  | 0.031819 |
| CDKL5    | 1.172052 | 0.890667 | 1.542335 | 0.257059 |
| CAMK1G   | 5.301362 | 0.161121 | 174.4302 | 0.349395 |
| NADK     | 1.341704 | 1.038664 | 1.733159 | 0.024424 |
| DLEC1    | 0.856926 | 0.561172 | 1.308551 | 0.474683 |
| CYTH3    | 0.778951 | 0.557067 | 1.089213 | 0.144184 |
| ADAM22   | 0.783307 | 0.606854 | 1.011067 | 0.060731 |
| SYPL1    | 0.776031 | 0.528197 | 1.140151 | 0.196437 |
| CYB561   | 1.400851 | 1.038513 | 1.889611 | 0.027284 |
| SPAG9    | 0.770416 | 0.478154 | 1.241315 | 0.283845 |
| CELSR3   | 1.055024 | 0.832246 | 1.337435 | 0.658049 |
| AASS     | 0.962211 | 0.805924 | 1.148806 | 0.670129 |
| PLEKHG6  | 0.648863 | 0.475615 | 0.885217 | 0.006347 |
| SS18L2   | 2.414363 | 1.287187 | 4.528594 | 0.006021 |
| MPND     | 0.829668 | 0.604351 | 1.138988 | 0.248091 |
| MGST1    | 0.883785 | 0.788099 | 0.991088 | 0.034594 |
| CRY1     | 1.259438 | 0.929793 | 1.705953 | 0.136274 |
| PGLYRP1  | 0.985682 | 0.847565 | 1.146307 | 0.851484 |
| NFIX     | 1.092803 | 0.845772 | 1.411985 | 0.497277 |
| ST3GAL1  | 1.17004  | 0.782662 | 1.749153 | 0.443993 |
| MMP25    | 0.883842 | 0.725804 | 1.076292 | 0.219263 |
| IL32     | 1.166648 | 0.935775 | 1.454482 | 0.170698 |
| PKD1     | 0.899965 | 0.692034 | 1.170371 | 0.431686 |
| MED24    | 1.230578 | 0.791287 | 1.913748 | 0.357089 |
| RHOBTB2  | 2.166647 | 1.543622 | 3.041131 | 7.84E-06 |
| HEATR5B  | 1.075947 | 0.700041 | 1.653704 | 0.738534 |
| SEC62    | 0.901133 | 0.592812 | 1.369809 | 0.626098 |
| RPS20    | 1.276672 | 0.805645 | 2.02309  | 0.29839  |

|          |          |          |          |          |
|----------|----------|----------|----------|----------|
| CSDE1    | 0.917868 | 0.60044  | 1.403108 | 0.692257 |
| UBE3C    | 0.722154 | 0.431826 | 1.207676 | 0.214705 |
| REV3L    | 0.618514 | 0.429675 | 0.890347 | 0.009742 |
| MASP2    | 0.835567 | 0.575358 | 1.213459 | 0.345345 |
| FAM76A   | 1.345623 | 0.729974 | 2.480501 | 0.341444 |
| TRAF3IP3 | 1.224477 | 0.876105 | 1.711374 | 0.235779 |
| POMT2    | 0.954571 | 0.654323 | 1.392593 | 0.809332 |
| VTA1     | 1.079786 | 0.650423 | 1.792582 | 0.76661  |
| MLXIPL   | 1.21267  | 0.882822 | 1.665758 | 0.233854 |
| BAZ1B    | 1.062767 | 0.661344 | 1.707846 | 0.801404 |
| RANBP9   | 0.689184 | 0.395217 | 1.201808 | 0.189507 |
| ETV7     | 1.266991 | 0.964401 | 1.66452  | 0.089201 |
| DYRK4    | 2.561907 | 1.255468 | 5.227825 | 0.009734 |
| ZNF207   | 0.539697 | 0.308657 | 0.94368  | 0.030519 |
| UQCRC1   | 1.970608 | 1.303733 | 2.978597 | 0.001289 |
| STARD3NL | 0.659204 | 0.37395  | 1.162054 | 0.149664 |
| CD9      | 0.989345 | 0.864199 | 1.132613 | 0.876624 |
| NCAPD2   | 1.076592 | 0.76035  | 1.524366 | 0.67747  |
| IFFO1    | 0.927148 | 0.659236 | 1.303938 | 0.663758 |
| GIPR     | 1.051358 | 0.788121 | 1.402517 | 0.733394 |
| PHF7     | 0.687492 | 0.452619 | 1.044245 | 0.078924 |
| SEMA3G   | 0.851825 | 0.633471 | 1.145444 | 0.288543 |
| NISCH    | 1.059931 | 0.783078 | 1.434665 | 0.706298 |
| STAB1    | 1.024641 | 0.946947 | 1.10871  | 0.545148 |
| FUZ      | 1.046517 | 0.643949 | 1.700754 | 0.854394 |
| SLC6A13  | 0.81861  | 0.325426 | 2.059214 | 0.670654 |
| IDS      | 0.84046  | 0.605078 | 1.167409 | 0.299875 |
| PRSS3    | 0.576054 | 0.362903 | 0.914398 | 0.019307 |
| ZNF200   | 0.903616 | 0.577798 | 1.41316  | 0.656886 |
| CD4      | 1.251775 | 1.073569 | 1.459563 | 0.004158 |
| LRRC23   | 0.779772 | 0.488677 | 1.244266 | 0.296794 |
| BTK      | 1.527776 | 0.977901 | 2.386846 | 0.062632 |
| HFE      | 1.290635 | 0.972331 | 1.713139 | 0.077434 |
| SCMH1    | 0.75295  | 0.57097  | 0.992931 | 0.044408 |
| FYN      | 1.032462 | 0.808016 | 1.319251 | 0.798385 |
| HIVEP2   | 0.860614 | 0.700241 | 1.057716 | 0.153675 |
| LYPLA2   | 1.91867  | 1.238193 | 2.973118 | 0.003545 |
| CLCN6    | 1.174175 | 0.738428 | 1.867057 | 0.497431 |
| MRC2     | 0.847195 | 0.748066 | 0.95946  | 0.009007 |
| TSPAN9   | 1.037722 | 0.788598 | 1.365546 | 0.791502 |
| BTBD7    | 0.844652 | 0.504974 | 1.41282  | 0.520059 |
| APBA3    | 1.293978 | 0.853838 | 1.961003 | 0.224361 |
| MKS1     | 0.880779 | 0.566473 | 1.369476 | 0.572942 |
| ABHD5    | 0.974635 | 0.717682 | 1.323584 | 0.869303 |
| AKAP8L   | 1.098339 | 0.70209  | 1.718225 | 0.681199 |
| MBTD1    | 0.517371 | 0.351215 | 0.762134 | 0.000855 |
| UTP18    | 0.746761 | 0.46899  | 1.189048 | 0.218554 |
| RNF216   | 0.835716 | 0.492838 | 1.41714  | 0.505376 |
| TTC19    | 0.724544 | 0.420332 | 1.248928 | 0.246118 |
| PTBP1    | 1.016091 | 0.615083 | 1.678538 | 0.950302 |
| DPF1     | 0.752937 | 0.523667 | 1.082584 | 0.125605 |
| LARS2    | 0.95476  | 0.583946 | 1.561047 | 0.853578 |
| PIK3C2A  | 0.819556 | 0.514933 | 1.304389 | 0.401334 |
| PLAUR    | 1.022245 | 0.862373 | 1.211755 | 0.79984  |
| ANLN     | 0.817105 | 0.630676 | 1.058642 | 0.126345 |
| WIZ      | 0.926471 | 0.62208  | 1.379805 | 0.707066 |
| RABGAP1  | 1.247031 | 0.879684 | 1.767776 | 0.214992 |
| QPCTL    | 0.950114 | 0.669604 | 1.348135 | 0.77438  |

|          |          |          |          |          |
|----------|----------|----------|----------|----------|
| PPP5C    | 1.764405 | 1.029112 | 3.02506  | 0.03899  |
| CEP68    | 0.848473 | 0.57533  | 1.251292 | 0.407112 |
| MAP4K3   | 0.675826 | 0.46016  | 0.99257  | 0.045717 |
| ZBTB32   | 1.254023 | 0.909604 | 1.728856 | 0.16708  |
| TYROBP   | 1.128465 | 0.95431  | 1.334401 | 0.157614 |
| TMEM159  | 1.273325 | 0.821037 | 1.974765 | 0.280482 |
| BRCA1    | 0.946006 | 0.704981 | 1.269435 | 0.711429 |
| ERCC1    | 1.716449 | 1.079647 | 2.728852 | 0.022375 |
| CD22     | 1.169157 | 0.958686 | 1.425836 | 0.122754 |
| SEMA3B   | 0.808651 | 0.511412 | 1.278647 | 0.363606 |
| MBTPS2   | 0.654567 | 0.40763  | 1.051097 | 0.079476 |
| PRICKLE3 | 1.592469 | 1.033796 | 2.453053 | 0.034794 |
| LTF      | 0.981419 | 0.896798 | 1.074024 | 0.683496 |
| EXTL3    | 1.249187 | 0.831958 | 1.875657 | 0.283338 |
| ELOVL5   | 1.018949 | 0.792851 | 1.309523 | 0.883414 |
| ALOX5    | 0.995674 | 0.883468 | 1.122131 | 0.943344 |
| CALCOCO  | 0.933122 | 0.634256 | 1.372817 | 0.725293 |
| UBR7     | 1.195309 | 0.742179 | 1.925091 | 0.463122 |
| MAP4K5   | 0.626176 | 0.416754 | 0.940834 | 0.024224 |
| EHD3     | 0.986543 | 0.813291 | 1.196701 | 0.89063  |
| PSMC4    | 2.184279 | 1.27609  | 3.738824 | 0.004386 |
| MAN2B2   | 1.132439 | 0.782527 | 1.638817 | 0.509546 |
| SLC25A39 | 1.03266  | 0.768612 | 1.387421 | 0.83109  |
| MVP      | 1.551315 | 1.231312 | 1.954483 | 0.000195 |
| NUB1     | 1.336504 | 0.833184 | 2.143877 | 0.228965 |
| PGM3     | 0.911568 | 0.621276 | 1.337499 | 0.635975 |
| RWDD2A   | 0.997446 | 0.697161 | 1.427072 | 0.988835 |
| CLK1     | 0.627255 | 0.39839  | 0.987599 | 0.044026 |
| POLR3B   | 0.707871 | 0.424893 | 1.179314 | 0.184626 |
| ANGEL1   | 1.738614 | 1.090434 | 2.772086 | 0.020142 |
| RNF14    | 0.861275 | 0.562662 | 1.318367 | 0.491752 |
| DNASE1L1 | 2.209972 | 1.497677 | 3.261034 | 6.48E-05 |
| DDX11    | 1.556969 | 1.066009 | 2.274044 | 0.021982 |
| HEBP1    | 1.153562 | 0.716188 | 1.85804  | 0.556942 |
| GPRC5A   | 0.162911 | 0.006137 | 4.324408 | 0.278066 |
| MAMLD1   | 0.877969 | 0.672105 | 1.146888 | 0.339756 |
| CD6      | 0.991468 | 0.817216 | 1.202874 | 0.930757 |
| TACC3    | 1.523321 | 0.96165  | 2.413047 | 0.072918 |
| POLA2    | 1.404954 | 0.857213 | 2.302692 | 0.177408 |
| ZC3H3    | 0.896125 | 0.670507 | 1.197663 | 0.458621 |
| CAPN1    | 1.797663 | 1.18762  | 2.721066 | 0.005555 |
| MDH1     | 1.580903 | 0.963583 | 2.59371  | 0.069815 |
| SLC30A9  | 0.908171 | 0.552433 | 1.492986 | 0.704109 |
| MTMR11   | 1.064405 | 0.948368 | 1.194641 | 0.28923  |
| COX15    | 1.44337  | 0.855343 | 2.43565  | 0.169237 |
| CCDC88C  | 1.153632 | 0.773431 | 1.720732 | 0.483575 |
| YAF2     | 0.790664 | 0.469789 | 1.330704 | 0.376532 |
| ZMYND11  | 0.953947 | 0.694607 | 1.310116 | 0.770853 |
| WAS      | 1.988237 | 1.402118 | 2.819367 | 0.000115 |
| DPEP1    | 1.155051 | 0.969748 | 1.375761 | 0.10617  |
| BID      | 1.593981 | 0.999143 | 2.542953 | 0.050422 |
| MATR3    | 0.548313 | 0.368818 | 0.815164 | 0.002977 |
| NPC1L1   | 1.362638 | 0.730512 | 2.541757 | 0.330667 |
| XYLT2    | 0.830223 | 0.546627 | 1.260953 | 0.382897 |
| NUDCD3   | 0.83879  | 0.504785 | 1.393798 | 0.497466 |
| GLT8D1   | 0.832237 | 0.550334 | 1.258544 | 0.384172 |
| ATP2C1   | 0.696168 | 0.469955 | 1.03127  | 0.070858 |
| SLC38A5  | 1.198173 | 0.890975 | 1.611289 | 0.23162  |

|          |          |          |          |          |
|----------|----------|----------|----------|----------|
| RALBP1   | 0.92849  | 0.593511 | 1.452531 | 0.74521  |
| RUFY3    | 0.659621 | 0.512247 | 0.849395 | 0.001259 |
| SLC11A1  | 1.10616  | 0.996408 | 1.228002 | 0.058429 |
| WWTR1    | 1.062932 | 0.772621 | 1.462328 | 0.707672 |
| AGPS     | 0.928975 | 0.664687 | 1.298345 | 0.666219 |
| TTC27    | 0.915668 | 0.658102 | 1.274039 | 0.601118 |
| ZNF582   | 0.986295 | 0.613098 | 1.586661 | 0.954634 |
| VSIG2    | 1.206224 | 1.030139 | 1.412408 | 0.019871 |
| PHLDB1   | 0.848924 | 0.59069  | 1.22005  | 0.376091 |
| MARCO    | 1.079641 | 0.962207 | 1.211407 | 0.192152 |
| PRDM11   | 0.856391 | 0.632023 | 1.16041  | 0.317235 |
| CD74     | 1.349687 | 1.139216 | 1.599042 | 0.000527 |
| HGF      | 0.803982 | 0.721099 | 0.896392 | 8.48E-05 |
| ZRANB1   | 0.646779 | 0.402384 | 1.039612 | 0.071934 |
| NCDN     | 1.38556  | 0.941168 | 2.039782 | 0.098397 |
| ZFP64    | 0.956546 | 0.554493 | 1.650119 | 0.873125 |
| MNAT1    | 0.462585 | 0.268883 | 0.795826 | 0.005353 |
| SAMD4A   | 1.250089 | 0.942897 | 1.657363 | 0.120824 |
| RUNX3    | 1.167539 | 0.982819 | 1.386976 | 0.077944 |
| PLEKHB1  | 1.128638 | 0.776756 | 1.639926 | 0.525574 |
| SERPINB1 | 0.824693 | 0.617484 | 1.101434 | 0.191704 |
| SPAST    | 0.752875 | 0.446487 | 1.269512 | 0.286965 |
| OSBPL5   | 0.846009 | 0.674941 | 1.060434 | 0.146818 |
| AQR      | 0.89534  | 0.539011 | 1.487228 | 0.669393 |
| FHL1     | 1.242384 | 1.065501 | 1.44863  | 0.005612 |
| NLRP2    | 1.13235  | 0.989621 | 1.295665 | 0.070577 |
| SLC45A4  | 1.31242  | 0.982061 | 1.753909 | 0.066119 |
| RNF10    | 1.31896  | 0.796902 | 2.183021 | 0.281535 |
| ZNF839   | 0.635302 | 0.371557 | 1.086264 | 0.097394 |
| ZDHHC6   | 1.259972 | 0.65189  | 2.435272 | 0.491876 |
| GRAMD1B  | 1.162118 | 0.957225 | 1.410867 | 0.128961 |
| RNH1     | 1.11671  | 0.833853 | 1.495516 | 0.458861 |
| NDUFS1   | 0.86854  | 0.523928 | 1.439819 | 0.584712 |
| RB1CC1   | 0.718569 | 0.485398 | 1.06375  | 0.098698 |
| ERP44    | 1.470219 | 0.830937 | 2.601332 | 0.18556  |
| ALAS1    | 1.162772 | 0.797659 | 1.695008 | 0.432881 |
| BIRC3    | 1.185498 | 0.902702 | 1.556888 | 0.221034 |
| AKAP11   | 0.842246 | 0.598107 | 1.18604  | 0.325594 |
| GLRX2    | 0.736215 | 0.416023 | 1.302844 | 0.293006 |
| SNAPC1   | 0.818358 | 0.528774 | 1.266532 | 0.368338 |
| DERA     | 0.862196 | 0.575987 | 1.290622 | 0.471275 |
| STRAP    | 1.094489 | 0.647538 | 1.84994  | 0.736001 |
| ABCC2    | 0.965551 | 0.596356 | 1.563309 | 0.886614 |
| DEF6     | 1.9073   | 1.215076 | 2.993879 | 0.005004 |
| PLEKHO1  | 1.333909 | 0.974404 | 1.826054 | 0.072155 |
| GCLM     | 1.216014 | 0.944057 | 1.566315 | 0.129964 |
| UBR2     | 0.747377 | 0.459085 | 1.216709 | 0.241563 |
| EHD2     | 1.062854 | 0.93375  | 1.209808 | 0.356241 |
| DEPDC1   | 0.947987 | 0.732958 | 1.226098 | 0.684036 |
| CCDC28A  | 1.411923 | 0.764433 | 2.607848 | 0.270506 |
| RRAGD    | 0.750557 | 0.590305 | 0.954314 | 0.019203 |
| HSF2     | 0.623197 | 0.421159 | 0.922157 | 0.018015 |
| PHF20    | 0.878494 | 0.503291 | 1.533408 | 0.648523 |
| NR1H3    | 1.03642  | 0.812755 | 1.321635 | 0.773032 |
| TYMP     | 1.137895 | 0.988275 | 1.310166 | 0.072496 |
| NCAPH2   | 1.439288 | 0.95562  | 2.167756 | 0.081383 |
| TOMM34   | 1.606685 | 0.987432 | 2.614293 | 0.056256 |
| SEC63    | 0.795728 | 0.481645 | 1.314627 | 0.372374 |

|          |          |          |          |          |
|----------|----------|----------|----------|----------|
| KPNA6    | 1.462568 | 0.65807  | 3.250576 | 0.350796 |
| VIM      | 1.098811 | 0.90105  | 1.339977 | 0.351975 |
| FAS      | 0.956253 | 0.659535 | 1.386461 | 0.813425 |
| RNASET2  | 0.990299 | 0.706351 | 1.388391 | 0.954905 |
| CD44     | 0.80007  | 0.622938 | 1.027569 | 0.080643 |
| AGPAT4   | 1.107914 | 0.895685 | 1.370429 | 0.344887 |
| SLAMF7   | 0.995607 | 0.817771 | 1.212117 | 0.965025 |
| BTN3A1   | 0.912091 | 0.673668 | 1.234894 | 0.551707 |
| MIPEP    | 1.241831 | 0.751979 | 2.050781 | 0.39742  |
| PRKCH    | 1.158478 | 0.947426 | 1.416545 | 0.151674 |
| IFNGR1   | 1.381254 | 1.093252 | 1.745127 | 0.006784 |
| B4GALT7  | 0.976721 | 0.633335 | 1.506284 | 0.91513  |
| SH2D2A   | 1.287254 | 1.01838  | 1.627115 | 0.034659 |
| VRK2     | 1.275284 | 0.781605 | 2.080781 | 0.330304 |
| TNFRSF1B | 1.197713 | 1.057608 | 1.356377 | 0.004478 |
| VEZT     | 0.859912 | 0.546309 | 1.353535 | 0.514357 |
| POU2F2   | 1.240076 | 1.048811 | 1.46622  | 0.011817 |
| BRD9     | 1.250945 | 0.675953 | 2.315047 | 0.475885 |
| SNX1     | 1.002505 | 0.586511 | 1.713551 | 0.992702 |
| TBPL1    | 0.897599 | 0.5421   | 1.486228 | 0.674567 |
| ARNTL2   | 1.221792 | 0.961106 | 1.553186 | 0.101844 |
| BCLAF1   | 0.712609 | 0.460465 | 1.102824 | 0.128338 |
| SLC39A9  | 1.098472 | 0.64537  | 1.869685 | 0.729259 |
| ANK1     | 0.95418  | 0.838259 | 1.086132 | 0.477872 |
| TFB1M    | 1.417569 | 0.814342 | 2.46764  | 0.217278 |
| RABEP1   | 0.729008 | 0.484588 | 1.09671  | 0.129287 |
| HMGB3    | 0.815801 | 0.650104 | 1.023729 | 0.078831 |
| NUP160   | 0.913807 | 0.596614 | 1.399637 | 0.678608 |
| BAK1     | 2.25285  | 1.445206 | 3.511839 | 0.000336 |
| IKZF2    | 0.885316 | 0.770521 | 1.017214 | 0.085598 |
| GRN      | 1.047153 | 0.894592 | 1.225731 | 0.566306 |
| FAM13B   | 0.658325 | 0.431211 | 1.005055 | 0.052793 |
| CENPQ    | 0.875948 | 0.60308  | 1.272278 | 0.486753 |
| RANBP3   | 1.26752  | 0.659389 | 2.436512 | 0.477092 |
| ARID4A   | 0.773701 | 0.472722 | 1.266312 | 0.307406 |
| PNPLA6   | 1.676777 | 1.264464 | 2.223535 | 0.000331 |
| IFT88    | 0.675015 | 0.424277 | 1.073935 | 0.097138 |
| ALG1     | 1.61193  | 0.934811 | 2.779512 | 0.085894 |
| ZCCHC8   | 0.528602 | 0.270893 | 1.03148  | 0.06161  |
| ABCF2    | 0.895122 | 0.542839 | 1.476023 | 0.664156 |
| CHPF2    | 0.99352  | 0.684622 | 1.441791 | 0.972704 |
| LRRC7    | 1.242731 | 0.529611 | 2.916064 | 0.617521 |
| FUT8     | 0.758303 | 0.538645 | 1.067536 | 0.112862 |
| UBA6     | 0.454285 | 0.280608 | 0.735456 | 0.001327 |
| GAB2     | 0.701041 | 0.512887 | 0.95822  | 0.025906 |
| ATP6V0A1 | 1.14207  | 0.9148   | 1.425801 | 0.240639 |
| PIAS1    | 0.835683 | 0.463363 | 1.507168 | 0.550789 |
| SLC4A7   | 0.813319 | 0.664782 | 0.995045 | 0.044618 |
| APBA2    | 1.098255 | 0.909543 | 1.326121 | 0.3299   |
| MAP2K3   | 1.640633 | 1.113199 | 2.417966 | 0.012353 |
| TMSB10   | 1.240215 | 0.889258 | 1.729681 | 0.204641 |
| ASTE1    | 0.696795 | 0.409819 | 1.184724 | 0.182197 |
| RNF19A   | 0.877396 | 0.558995 | 1.377155 | 0.569592 |
| PEX3     | 0.700181 | 0.489103 | 1.002353 | 0.05152  |
| GABARAPI | 1.355036 | 0.696004 | 2.638093 | 0.371415 |
| SH3YL1   | 0.571262 | 0.39763  | 0.820713 | 0.002456 |
| FAM136A  | 1.102283 | 0.66998  | 1.813529 | 0.701457 |
| VCL      | 1.620959 | 1.203153 | 2.183852 | 0.001493 |

|         |          |          |          |          |
|---------|----------|----------|----------|----------|
| DEPDC1B | 1.029114 | 0.797296 | 1.328335 | 0.825574 |
| DAPK2   | 1.195098 | 0.905726 | 1.576923 | 0.207683 |
| NSMAF   | 0.678461 | 0.435142 | 1.057837 | 0.086924 |
| STAP1   | 0.919245 | 0.758515 | 1.114033 | 0.390502 |
| TIMP2   | 0.958239 | 0.716236 | 1.282011 | 0.773938 |
| RFC1    | 0.932915 | 0.632801 | 1.375362 | 0.725861 |
| TBC1D23 | 0.810631 | 0.472034 | 1.392108 | 0.446701 |
| CUL3    | 0.803165 | 0.454234 | 1.420138 | 0.450984 |
| MYOM2   | 1.054416 | 0.779061 | 1.427094 | 0.731491 |
| CYP46A1 | 1.101774 | 0.915786 | 1.325536 | 0.304226 |
| ZZZ3    | 0.789083 | 0.506164 | 1.230137 | 0.295717 |
| USP2    | 1.283092 | 0.921961 | 1.785678 | 0.139367 |
| TUBG2   | 1.310818 | 1.020177 | 1.68426  | 0.034332 |
| RPL26L1 | 1.522879 | 0.908744 | 2.55205  | 0.110333 |
| FLT4    | 0.811714 | 0.660907 | 0.996933 | 0.046673 |
| NSUN2   | 1.446289 | 0.876375 | 2.386824 | 0.148829 |
| FBXO42  | 1.031399 | 0.54605  | 1.948144 | 0.924092 |
| MFAP3   | 0.856449 | 0.586299 | 1.251074 | 0.422875 |
| MRI1    | 1.183577 | 0.812436 | 1.724263 | 0.379975 |
| METTL1  | 1.244484 | 0.812866 | 1.905282 | 0.314168 |
| AGA     | 0.876324 | 0.598977 | 1.282092 | 0.496496 |
| PI4K2B  | 1.275368 | 0.841343 | 1.933296 | 0.251789 |
| MAT2B   | 0.845897 | 0.546942 | 1.308259 | 0.451911 |
| EDC4    | 1.103247 | 0.777942 | 1.564582 | 0.581468 |
| TRIO    | 0.977957 | 0.778188 | 1.229009 | 0.848375 |
| VCAN    | 1.047505 | 0.972425 | 1.128382 | 0.221301 |
| CLEC16A | 1.52688  | 0.867833 | 2.686419 | 0.142049 |
| MSR1    | 1.151595 | 1.001552 | 1.324116 | 0.047508 |
| CDH1    | 0.925935 | 0.751141 | 1.141405 | 0.470969 |
| ZFYVE16 | 0.537286 | 0.37906  | 0.761557 | 0.000482 |
| RAI14   | 1.133686 | 0.86639  | 1.483446 | 0.360413 |
| PNKP    | 1.285093 | 0.814167 | 2.028408 | 0.281427 |
| BEST2   | 0.611244 | 0.301325 | 1.239921 | 0.172548 |
| PHLPP2  | 1.056282 | 0.75109  | 1.485483 | 0.752967 |
| STAU2   | 0.581181 | 0.36093  | 0.935835 | 0.025561 |
| CTNS    | 1.481594 | 0.929508 | 2.361593 | 0.098401 |
| RTN4R   | 0.839118 | 0.716826 | 0.982274 | 0.029073 |
| PHF23   | 1.037606 | 0.642208 | 1.676447 | 0.880122 |
| INPP4A  | 1.144428 | 0.783528 | 1.671561 | 0.485227 |
| RAB27B  | 1.246875 | 1.085882 | 1.431736 | 0.00176  |
| PSMA4   | 1.669763 | 0.96093  | 2.901469 | 0.068973 |
| MYO16   | 1.100126 | 0.772472 | 1.56676  | 0.596839 |
| LSG1    | 0.890673 | 0.553598 | 1.432986 | 0.633229 |
| PARP3   | 1.856059 | 1.42855  | 2.411505 | 3.65E-06 |
| TNC     | 0.998089 | 0.822993 | 1.210438 | 0.984494 |
| THAP3   | 1.374145 | 0.776511 | 2.431743 | 0.275101 |
| TDP1    | 0.921007 | 0.559667 | 1.515641 | 0.746109 |
| AIFM2   | 1.85184  | 1.363762 | 2.514597 | 7.89E-05 |
| SPATA7  | 0.522412 | 0.330816 | 0.824972 | 0.005347 |
| MED17   | 0.603379 | 0.363232 | 1.002296 | 0.051044 |
| RETSAT  | 1.495264 | 0.924503 | 2.418396 | 0.101012 |
| CAPG    | 1.102947 | 0.942539 | 1.290655 | 0.22172  |
| AP2S1   | 1.571127 | 1.04253  | 2.367741 | 0.03085  |
| TG      | 1.812477 | 0.978457 | 3.3574   | 0.058661 |
| ADAM28  | 1.190018 | 1.007026 | 1.406261 | 0.041136 |
| DCUN1D1 | 0.81652  | 0.483216 | 1.379723 | 0.448843 |
| LCP2    | 1.406649 | 0.892655 | 2.216602 | 0.14141  |
| TRIT1   | 0.739992 | 0.406485 | 1.34713  | 0.324567 |



|          |          |          |          |          |
|----------|----------|----------|----------|----------|
| ADRB1    | 1.170022 | 0.995734 | 1.374815 | 0.056388 |
| CUL7     | 0.941056 | 0.637433 | 1.3893   | 0.759858 |
| CTNNA1   | 1.105268 | 0.870354 | 1.403586 | 0.411657 |
| PHKA2    | 1.124154 | 0.773421 | 1.633939 | 0.539633 |
| CNTLN    | 1.350776 | 0.989179 | 1.844557 | 0.058555 |
| HSPA5    | 0.87901  | 0.675748 | 1.143414 | 0.336488 |
| DSG2     | 1.032394 | 0.910496 | 1.170612 | 0.618978 |
| GEMIN8   | 0.892101 | 0.565316 | 1.407787 | 0.623753 |
| OFD1     | 1.575708 | 1.012962 | 2.451086 | 0.043686 |
| GPM6B    | 1.04869  | 0.817048 | 1.346006 | 0.70891  |
| PREX2    | 1.058373 | 0.828937 | 1.351314 | 0.649055 |
| WDR37    | 1.168763 | 0.716586 | 1.90627  | 0.532109 |
| YTHDC2   | 0.640101 | 0.412784 | 0.9926   | 0.046245 |
| CTPS2    | 0.852658 | 0.622067 | 1.168725 | 0.321779 |
| ATP6V1H  | 2.153376 | 1.173853 | 3.950263 | 0.013221 |
| POLR2B   | 0.938539 | 0.585542 | 1.504343 | 0.792156 |
| ARAP2    | 1.005483 | 0.790649 | 1.278692 | 0.964438 |
| TPR      | 0.925463 | 0.628423 | 1.362906 | 0.694894 |
| CP       | 0.897708 | 0.68579  | 1.17511  | 0.432188 |
| DTNBP1   | 0.746133 | 0.427222 | 1.303103 | 0.303304 |
| XK       | 0.939793 | 0.810841 | 1.089253 | 0.409582 |
| SCML1    | 0.967619 | 0.766336 | 1.221772 | 0.782064 |
| WWC3     | 0.974064 | 0.78483  | 1.208925 | 0.811544 |
| ARHGAP6  | 1.259218 | 1.011741 | 1.567228 | 0.038969 |
| FAM184B  | 0.455345 | 0.214379 | 0.967163 | 0.040674 |
| MAP4     | 0.831122 | 0.517823 | 1.333976 | 0.44352  |
| GOPC     | 0.754959 | 0.502889 | 1.133379 | 0.175105 |
| USP28    | 0.985293 | 0.669349 | 1.450367 | 0.940128 |
| HDAC9    | 1.151998 | 0.973488 | 1.363242 | 0.099521 |
| TSPAN17  | 1.219804 | 0.894874 | 1.662716 | 0.208691 |
| NOP16    | 1.082076 | 0.727686 | 1.609058 | 0.696787 |
| CC2D2A   | 0.958536 | 0.740119 | 1.241412 | 0.748239 |
| RRM2B    | 1.000674 | 0.651193 | 1.537715 | 0.997547 |
| ZNF800   | 0.708982 | 0.448057 | 1.121854 | 0.141865 |
| TNFRSF17 | 0.927965 | 0.722706 | 1.191521 | 0.557785 |
| SNX29    | 1.049568 | 0.708971 | 1.55379  | 0.809019 |
| MRPS10   | 1.408548 | 0.759741 | 2.611426 | 0.27678  |
| RSF1     | 0.86757  | 0.534973 | 1.406946 | 0.564691 |
| VPS13D   | 0.911838 | 0.615636 | 1.350551 | 0.645151 |
| FAM120A  | 1.635038 | 0.963229 | 2.775403 | 0.068578 |
| R3HDM1   | 0.898936 | 0.50951  | 1.586004 | 0.713023 |
| COL9A2   | 1.152825 | 0.966    | 1.375782 | 0.114909 |
| KITLG    | 1.135524 | 0.828309 | 1.556683 | 0.429743 |
| ERCC8    | 0.710234 | 0.437807 | 1.152179 | 0.165712 |
| ADAMTS6  | 1.088413 | 0.847162 | 1.398368 | 0.507554 |
| H6PD     | 0.85195  | 0.609418 | 1.191002 | 0.348567 |
| VAMP3    | 1.437078 | 0.909743 | 2.270084 | 0.120075 |
| PER3     | 0.992423 | 0.790117 | 1.24653  | 0.947864 |
| UTS2     | 1.017241 | 0.766817 | 1.349447 | 0.905629 |
| TNFRSF9  | 1.318079 | 0.867858 | 2.00186  | 0.195229 |
| LTBP1    | 0.961723 | 0.849903 | 1.088255 | 0.536001 |
| RCN1     | 0.662502 | 0.478504 | 0.917253 | 0.013128 |
| ELN      | 1.148845 | 0.961891 | 1.372135 | 0.125719 |
| RFC2     | 1.598049 | 0.959136 | 2.662564 | 0.071895 |
| ARID1B   | 0.713714 | 0.483069 | 1.054482 | 0.090345 |
| CLPTM1L  | 1.106212 | 0.644423 | 1.898915 | 0.714258 |
| NEDD4L   | 0.985766 | 0.723587 | 1.342941 | 0.927591 |
| FOXP3    | 1.53703  | 0.974782 | 2.42358  | 0.064308 |

|          |          |          |          |          |
|----------|----------|----------|----------|----------|
| PPP1R3F  | 1.116936 | 0.614819 | 2.029129 | 0.716562 |
| HEXB     | 1.131684 | 0.881797 | 1.452386 | 0.331156 |
| PTCD2    | 0.977491 | 0.642947 | 1.486109 | 0.915175 |
| DKK3     | 0.56295  | 0.045287 | 6.997871 | 0.654987 |
| ARHGEF5  | 1.742903 | 1.251955 | 2.426375 | 0.000998 |
| NFE2L3   | 1.119744 | 0.834777 | 1.50199  | 0.450382 |
| LIMA1    | 1.367901 | 0.986865 | 1.896058 | 0.060027 |
| LETMD1   | 1.153964 | 0.634712 | 2.098012 | 0.638698 |
| SLC4A8   | 1.330616 | 0.93421  | 1.895227 | 0.113456 |
| LAMC3    | 0.640004 | 0.461114 | 0.888296 | 0.007628 |
| PTGER3   | 0.826243 | 0.653946 | 1.043935 | 0.109684 |
| MAPK9    | 1.073005 | 0.597711 | 1.926246 | 0.813408 |
| COL23A1  | 0.909659 | 0.820565 | 1.008426 | 0.071796 |
| BCAR1    | 1.225755 | 0.609212 | 2.466262 | 0.56824  |
| FAM160A2 | 1.095501 | 0.752801 | 1.594209 | 0.633707 |
| HERPUD1  | 1.046828 | 0.784685 | 1.396547 | 0.755654 |
| HOMER3   | 0.882336 | 0.75717  | 1.028194 | 0.108767 |
| RAD51    | 1.507681 | 1.014908 | 2.239714 | 0.042028 |
| POLQ     | 1.012351 | 0.759091 | 1.350109 | 0.933399 |
| PIK3CB   | 0.693257 | 0.499769 | 0.961655 | 0.028226 |
| CYBA     | 1.352976 | 1.016596 | 1.800659 | 0.038188 |
| THOC3    | 1.536503 | 0.889184 | 2.655064 | 0.123781 |
| HEBP2    | 1.503161 | 0.967626 | 2.335089 | 0.069751 |
| MPHOSP1  | 0.718801 | 0.474829 | 1.088127 | 0.118588 |
| PLEKHA5  | 0.714667 | 0.573837 | 0.890059 | 0.002699 |
| PRSS8    | 0.85463  | 0.442892 | 1.649143 | 0.639514 |
| RRP12    | 1.064285 | 0.842944 | 1.343745 | 0.600468 |
| FNIP2    | 1.274103 | 0.987107 | 1.644541 | 0.062842 |
| TTC17    | 0.794007 | 0.508518 | 1.239773 | 0.310303 |
| ALX4     | 0.518258 | 0.265168 | 1.01291  | 0.05455  |
| FOXN3    | 1.129784 | 0.755821 | 1.688774 | 0.551858 |
| AKR7A2   | 1.7994   | 1.262616 | 2.564391 | 0.001154 |
| MRTO4    | 1.466964 | 0.944998 | 2.277236 | 0.087668 |
| NNAT     | 0.924467 | 0.599862 | 1.424725 | 0.721917 |
| USE1     | 1.333029 | 0.808602 | 2.197577 | 0.259734 |
| MCF2L2   | 1.113562 | 0.621572 | 1.994973 | 0.717672 |
| NRIP2    | 0.738353 | 0.501433 | 1.087214 | 0.124434 |
| LAMA3    | 1.586432 | 1.211522 | 2.07736  | 0.000794 |
| ANAPC4   | 0.71267  | 0.427774 | 1.187305 | 0.193358 |
| KCNQ1    | 1.273931 | 1.077495 | 1.506179 | 0.004604 |
| TRAPPC3  | 3.72678  | 1.578657 | 8.797917 | 0.002684 |
| THRAP3   | 1.269722 | 0.675039 | 2.388297 | 0.458804 |
| PHPT1    | 1.002161 | 0.735748 | 1.365042 | 0.989075 |
| ENTPD2   | 1.452812 | 0.739885 | 2.852688 | 0.277966 |
| LY75     | 1.093858 | 0.778734 | 1.536499 | 0.604837 |
| ARID4B   | 0.850553 | 0.532626 | 1.358251 | 0.497896 |
| OPN3     | 1.284085 | 0.88455  | 1.864081 | 0.188553 |
| SDCCAG8  | 0.712242 | 0.463539 | 1.09438  | 0.121519 |
| HHAT     | 1.126323 | 0.829582 | 1.529207 | 0.445785 |
| KIF1B    | 1.118409 | 0.900788 | 1.388604 | 0.310776 |
| FOXC1    | 1.023904 | 0.918476 | 1.141434 | 0.670047 |
| TBC1D22A | 1.435375 | 0.847151 | 2.432035 | 0.17914  |
| SYNE2    | 1.016964 | 0.821615 | 1.258758 | 0.877165 |
| PLEKHH1  | 1.069813 | 0.672022 | 1.70307  | 0.776046 |
| ATP9A    | 0.839668 | 0.71001  | 0.993003 | 0.04115  |
| FAM168A  | 1.409466 | 0.979574 | 2.028019 | 0.064487 |
| RELT     | 1.393848 | 1.116245 | 1.74049  | 0.003385 |
| GALC     | 0.932378 | 0.774988 | 1.121733 | 0.457953 |

|          |          |          |          |          |
|----------|----------|----------|----------|----------|
| NOP58    | 0.953787 | 0.624271 | 1.457234 | 0.826812 |
| KCNH2    | 0.949326 | 0.82979  | 1.086082 | 0.448842 |
| CUL1     | 0.701684 | 0.509312 | 0.966718 | 0.030234 |
| FAM114A2 | 0.991635 | 0.607101 | 1.619731 | 0.973231 |
| CYFIP2   | 1.161041 | 0.932186 | 1.44608  | 0.182519 |
| EIF2AK2  | 1.244004 | 0.893269 | 1.732453 | 0.196342 |
| USP36    | 0.951729 | 0.644956 | 1.404418 | 0.803193 |
| PUM2     | 0.571995 | 0.346088 | 0.94536  | 0.02932  |
| MRPL43   | 1.620859 | 0.857487 | 3.063817 | 0.1371   |
| ITIH4    | 1.001045 | 0.496714 | 2.017441 | 0.997668 |
| ZFR      | 0.861062 | 0.525555 | 1.410752 | 0.552615 |
| ZNF280C  | 0.584478 | 0.383621 | 0.890499 | 0.012427 |
| TRAF1    | 1.139159 | 0.858383 | 1.511777 | 0.366864 |
| RC3H2    | 0.982612 | 0.653898 | 1.476573 | 0.932728 |
| IL17RB   | 0.800556 | 0.53255  | 1.203437 | 0.284811 |
| TRAF3IP2 | 0.69473  | 0.481751 | 1.001864 | 0.051177 |
| GYG2     | 0.818087 | 0.659213 | 1.01525  | 0.068367 |
| DCBLD2   | 0.712224 | 0.543082 | 0.934046 | 0.01416  |
| SOAT1    | 1.149669 | 0.832335 | 1.587991 | 0.397361 |
| PKP2     | 1.122253 | 0.90996  | 1.384074 | 0.281014 |
| MSH4     | 0.638532 | 0.365349 | 1.11598  | 0.115315 |
| GDI2     | 0.906838 | 0.611039 | 1.345832 | 0.627339 |
| PRDM1    | 1.26972  | 0.942537 | 1.710479 | 0.116252 |
| ATG5     | 0.962478 | 0.501145 | 1.848495 | 0.90856  |
| TMCC3    | 1.071394 | 0.837197 | 1.371105 | 0.583712 |
| MTA3     | 0.96123  | 0.759726 | 1.216179 | 0.741831 |
| USP13    | 0.736203 | 0.538318 | 1.006831 | 0.055195 |
| ATP11B   | 1.045992 | 0.736055 | 1.486436 | 0.801979 |
| SEC61A1  | 1.353703 | 0.794844 | 2.305499 | 0.264949 |
| PPP1R12A | 0.813371 | 0.466569 | 1.417953 | 0.466331 |
| CROCC    | 1.231375 | 0.941262 | 1.610906 | 0.128925 |
| POLR3E   | 0.820277 | 0.530228 | 1.268992 | 0.373521 |
| ATP2B4   | 1.002124 | 0.764981 | 1.312782 | 0.987713 |
| ZC3H11A  | 0.142696 | 0.039321 | 0.517845 | 0.00307  |
| RIOK2    | 0.772413 | 0.497615 | 1.198961 | 0.249687 |
| YIPF1    | 1.494822 | 0.822626 | 2.716291 | 0.187094 |
| DGKG     | 0.760446 | 0.593878 | 0.973733 | 0.029933 |
| FLYWCH1  | 1.220655 | 0.883955 | 1.685605 | 0.225946 |
| UNKL     | 0.923134 | 0.626945 | 1.359253 | 0.685366 |
| TBXAS1   | 1.003566 | 0.763837 | 1.318535 | 0.979607 |
| PARP12   | 1.143312 | 0.847073 | 1.543152 | 0.381418 |
| ALDH18A1 | 0.926979 | 0.668659 | 1.285095 | 0.649144 |
| TARBP1   | 0.958605 | 0.719908 | 1.276445 | 0.772306 |
| MXD1     | 0.834252 | 0.649711 | 1.071211 | 0.155409 |
| DNAJC25  | 0.824534 | 0.506975 | 1.341003 | 0.436853 |
| SLC2A3   | 0.928097 | 0.782561 | 1.100699 | 0.391196 |
| PSD      | 1.052511 | 0.705589 | 1.570009 | 0.801942 |
| CTDP1    | 0.792728 | 0.556329 | 1.12958  | 0.19859  |
| STYK1    | 0.866494 | 0.715693 | 1.049069 | 0.141854 |
| WNK1     | 0.967098 | 0.650569 | 1.437632 | 0.868634 |
| CCAR1    | 0.940416 | 0.51795  | 1.707467 | 0.840015 |
| OGFR     | 1.685029 | 1.191067 | 2.383847 | 0.003201 |
| GNA15    | 0.899389 | 0.725386 | 1.115133 | 0.33374  |
| CREB3L3  | 1.044287 | 0.797277 | 1.367826 | 0.752987 |
| PIGV     | 0.953255 | 0.620869 | 1.463585 | 0.826777 |
| PTPRU    | 1.039538 | 0.727308 | 1.485808 | 0.831501 |
| SNRNP40  | 2.055324 | 1.025144 | 4.120745 | 0.042363 |
| COL11A1  | 1.209228 | 0.847444 | 1.725464 | 0.294923 |

|          |          |          |          |          |
|----------|----------|----------|----------|----------|
| QSER1    | 0.895551 | 0.617402 | 1.29901  | 0.561002 |
| ACAA1    | 1.290572 | 0.848641 | 1.962639 | 0.233012 |
| BCAT1    | 1.122013 | 0.976085 | 1.289758 | 0.105348 |
| HDAC7    | 1.574772 | 1.098753 | 2.257018 | 0.013407 |
| LZTS1    | 0.496238 | 0.258493 | 0.952645 | 0.035225 |
| SPAG4    | 0.790899 | 0.54996  | 1.137392 | 0.205699 |
| NCKAP1   | 1.277355 | 0.858491 | 1.900586 | 0.227281 |
| MRPS35   | 1.148111 | 0.710908 | 1.854191 | 0.572237 |
| TNK2     | 1.131405 | 0.817697 | 1.565467 | 0.456163 |
| MON2     | 0.578489 | 0.371381 | 0.901096 | 0.015498 |
| GPBP1    | 0.701533 | 0.426797 | 1.153122 | 0.162094 |
| DGAT2    | 1.259879 | 0.990419 | 1.602651 | 0.059896 |
| CS       | 1.988833 | 0.984987 | 4.015744 | 0.05514  |
| LTK      | 0.830199 | 0.732475 | 0.940961 | 0.003587 |
| MRPS24   | 0.848107 | 0.434955 | 1.653701 | 0.628701 |
| ELMO2    | 1.083415 | 0.712683 | 1.646998 | 0.707724 |
| APPBP2   | 0.703835 | 0.441088 | 1.123093 | 0.140733 |
| POLD1    | 1.175888 | 0.853585 | 1.619887 | 0.321518 |
| SEZ6     | 0.848974 | 0.593979 | 1.213438 | 0.368965 |
| EIF4B    | 0.97671  | 0.674263 | 1.414822 | 0.900808 |
| SLC6A16  | 1.538953 | 1.095585 | 2.161746 | 0.012901 |
| SPHK2    | 1.100326 | 0.688443 | 1.75863  | 0.68945  |
| RPL18    | 1.127592 | 0.748227 | 1.699302 | 0.566059 |
| CA11     | 1.043492 | 0.760173 | 1.432405 | 0.792241 |
| ISOC2    | 1.15868  | 0.806751 | 1.66413  | 0.425235 |
| U2AF2    | 1.343094 | 0.83831  | 2.15183  | 0.219979 |
| EPN1     | 1.648697 | 1.111683 | 2.445123 | 0.012901 |
| MED29    | 2.215884 | 1.207348 | 4.066883 | 0.010224 |
| ZNF275   | 1.754892 | 1.162976 | 2.648073 | 0.007379 |
| MTMR1    | 1.617429 | 1.041481 | 2.51188  | 0.03228  |
| GPC1     | 1.140737 | 0.862228 | 1.509208 | 0.356529 |
| ADCK1    | 1.371713 | 0.858712 | 2.191186 | 0.185979 |
| HAGH     | 1.132876 | 0.737244 | 1.740816 | 0.569224 |
| RNF4     | 1.296594 | 0.648412 | 2.592728 | 0.462559 |
| CASP8    | 1.39329  | 0.771148 | 2.517362 | 0.271804 |
| TM7SF3   | 0.73045  | 0.567698 | 0.939861 | 0.014597 |
| DLX3     | 0.518444 | 0.23986  | 1.120588 | 0.09483  |
| SPA17    | 0.881929 | 0.489716 | 1.588266 | 0.675508 |
| TSPAN32  | 1.194737 | 0.997031 | 1.431647 | 0.053886 |
| ST3GAL6  | 0.796905 | 0.644175 | 0.985846 | 0.036503 |
| ATP2C2   | 1.358681 | 0.709567 | 2.601606 | 0.355075 |
| NGFR     | 1.094228 | 0.853987 | 1.402051 | 0.476474 |
| TAF2     | 0.792072 | 0.450009 | 1.394144 | 0.419046 |
| HIPK2    | 1.119942 | 0.859659 | 1.459033 | 0.401244 |
| TNPO3    | 0.687532 | 0.449518 | 1.051569 | 0.083982 |
| RFXANK   | 1.709977 | 1.066562 | 2.741539 | 0.025912 |
| TMEM161, | 1.178661 | 0.816821 | 1.700791 | 0.379644 |
| LPAR2    | 1.111116 | 0.844255 | 1.462329 | 0.452131 |
| CTSA     | 1.087913 | 0.833316 | 1.420297 | 0.535616 |
| SLC12A2  | 0.733982 | 0.551333 | 0.977141 | 0.034145 |
| SNX24    | 1.202962 | 0.939641 | 1.540075 | 0.142639 |
| CNN2     | 0.957372 | 0.754549 | 1.214713 | 0.719863 |
| ABCA7    | 1.255845 | 1.005509 | 1.568504 | 0.044601 |
| DDX20    | 1.059468 | 0.626447 | 1.791807 | 0.829399 |
| BTBD1    | 1.095694 | 0.682667 | 1.75861  | 0.705004 |
| FAR2     | 1.177937 | 0.835233 | 1.661255 | 0.350522 |
| POU1F1   | 0.773706 | 0.423973 | 1.411932 | 0.403172 |
| CHI3L2   | 1.03875  | 0.709077 | 1.521699 | 0.845267 |

|          |          |          |          |          |
|----------|----------|----------|----------|----------|
| SBNO2    | 1.270415 | 0.932603 | 1.73059  | 0.129127 |
| PMS1     | 0.884034 | 0.550277 | 1.420223 | 0.610337 |
| HMG20B   | 1.315996 | 0.857146 | 2.020481 | 0.209374 |
| CALCRL   | 1.337461 | 1.158689 | 1.543817 | 7.13E-05 |
| TAF11    | 0.966503 | 0.448344 | 2.083507 | 0.930722 |
| ANKS1A   | 0.818992 | 0.583748 | 1.149037 | 0.247753 |
| AP3D1    | 1.3387   | 0.818787 | 2.188748 | 0.244868 |
| ZNF76    | 1.030381 | 0.67374  | 1.575809 | 0.890183 |
| SLC9A3R2 | 1.07469  | 0.909754 | 1.269528 | 0.396795 |
| NTHL1    | 1.166017 | 0.840125 | 1.618326 | 0.358428 |
| UHRF1BP1 | 0.828326 | 0.520454 | 1.318317 | 0.426969 |
| GNAI3    | 1.223428 | 0.719946 | 2.079012 | 0.456028 |
| IPO5     | 1.05539  | 0.746504 | 1.492087 | 0.760252 |
| OAT      | 1.168532 | 0.935943 | 1.458922 | 0.169018 |
| WDR3     | 0.981338 | 0.677948 | 1.420498 | 0.920478 |
| PKN2     | 0.645737 | 0.408213 | 1.021467 | 0.061596 |
| WDR18    | 1.485048 | 1.038917 | 2.122755 | 0.030051 |
| TRAM2    | 0.983164 | 0.654392 | 1.477114 | 0.934843 |
| NTN1     | 1.075935 | 0.888358 | 1.303119 | 0.453974 |
| MCM10    | 1.147279 | 0.857504 | 1.534977 | 0.354972 |
| DGKA     | 1.622544 | 1.133662 | 2.322252 | 0.008151 |
| ERBB3    | 0.510073 | 0.083851 | 3.10281  | 0.464907 |
| ANKRD44  | 0.860613 | 0.625262 | 1.184551 | 0.35709  |
| ADAT1    | 0.993131 | 0.545379 | 1.808483 | 0.982019 |
| PDIA5    | 0.884549 | 0.653801 | 1.196735 | 0.426353 |
| TBC1D22B | 1.667189 | 1.010496 | 2.750649 | 0.04541  |
| NDUFB4   | 1.084594 | 0.59718  | 1.969832 | 0.789689 |
| SPEN     | 0.974865 | 0.596542 | 1.593116 | 0.919085 |
| MYLK     | 1.186418 | 0.964449 | 1.459473 | 0.105781 |
| ZC3H15   | 1.019098 | 0.620099 | 1.674829 | 0.940506 |
| MAP2K4   | 0.792264 | 0.480628 | 1.305965 | 0.36116  |
| SLK      | 1.055943 | 0.744788 | 1.49709  | 0.759895 |
| CYB5R4   | 0.880876 | 0.601518 | 1.289973 | 0.514592 |
| COL17A1  | 0.966991 | 0.641282 | 1.458129 | 0.872742 |
| GSTO2    | 1.219219 | 0.741906 | 2.003614 | 0.434176 |
| SEC61A2  | 1.056005 | 0.733663 | 1.519971 | 0.769324 |
| PRKCQ    | 0.989672 | 0.784975 | 1.247749 | 0.93003  |
| TLE2     | 0.7582   | 0.52591  | 1.09309  | 0.138054 |
| ASB1     | 1.252169 | 0.811729 | 1.931589 | 0.309245 |
| FAM107B  | 1.114073 | 0.890174 | 1.394288 | 0.345341 |
| ME1      | 0.997739 | 0.857979 | 1.160265 | 0.976546 |
| TBC1D1   | 1.45051  | 1.055662 | 1.993043 | 0.021785 |
| MTHFD2   | 0.828657 | 0.553397 | 1.240831 | 0.361546 |
| SLC9A7   | 1.201784 | 0.994471 | 1.452315 | 0.057096 |
| FOXJ2    | 0.899848 | 0.517249 | 1.565448 | 0.708741 |
| YBX1     | 1.196038 | 0.73785  | 1.93875  | 0.467608 |
| PDE4A    | 1.173795 | 0.987872 | 1.394709 | 0.068564 |
| PPP2R5A  | 1.374199 | 0.822824 | 2.295053 | 0.224469 |
| ELAVL1   | 0.848808 | 0.429597 | 1.677093 | 0.637076 |
| TIE1     | 1.017414 | 0.850835 | 1.216607 | 0.849902 |
| DIP2B    | 0.903707 | 0.618333 | 1.320785 | 0.601009 |
| SMARCD1  | 1.204752 | 0.757753 | 1.915435 | 0.431055 |
| NFYC     | 0.915166 | 0.504496 | 1.660132 | 0.770479 |
| ZMYND12  | 0.871976 | 0.594247 | 1.279506 | 0.483806 |
| SLC9A3   | 0.697611 | 0.511081 | 0.95222  | 0.023306 |
| NGEF     | 0.798508 | 0.42453  | 1.501934 | 0.485137 |
| ASPM     | 0.86027  | 0.680789 | 1.087068 | 0.207421 |
| CD84     | 1.117503 | 0.91671  | 1.362278 | 0.2716   |

|          |          |          |          |          |
|----------|----------|----------|----------|----------|
| ELOVL1   | 2.140014 | 1.312426 | 3.489461 | 0.00229  |
| SPI1     | 1.362742 | 1.041923 | 1.782344 | 0.023832 |
| MPPED2   | 1.000361 | 0.722883 | 1.38435  | 0.998261 |
| CLDN18   | 0.646737 | 0.34357  | 1.21742  | 0.176894 |
| ZBTB11   | 0.66204  | 0.422293 | 1.037899 | 0.072207 |
| ATXN3    | 0.510633 | 0.295922 | 0.881131 | 0.015752 |
| GOLGA5   | 0.941701 | 0.59724  | 1.484831 | 0.795991 |
| LRRC40   | 1.025898 | 0.598804 | 1.757614 | 0.92584  |
| ISOC1    | 0.722085 | 0.475205 | 1.097226 | 0.12718  |
| TRMT11   | 0.952327 | 0.559283 | 1.621588 | 0.857253 |
| THUMPD1  | 0.658758 | 0.47883  | 0.906296 | 0.010334 |
| KIF26A   | 0.710516 | 0.572857 | 0.881257 | 0.001868 |
| ATG2B    | 0.716539 | 0.486582 | 1.055173 | 0.091412 |
| ARFGEF1  | 0.451645 | 0.308538 | 0.661128 | 4.34E-05 |
| ZFAT     | 1.475732 | 0.981632 | 2.218534 | 0.061367 |
| MTFR1    | 0.605861 | 0.388111 | 0.945779 | 0.027433 |
| STAG3    | 0.632573 | 0.451805 | 0.885666 | 0.007652 |
| FECH     | 0.982977 | 0.751893 | 1.285082 | 0.900072 |
| MYO9A    | 0.622568 | 0.419219 | 0.924554 | 0.018837 |
| DDX3Y    | 0.986319 | 0.92435  | 1.052442 | 0.677342 |
| PFKP     | 1.299882 | 0.976828 | 1.729776 | 0.071997 |
| IDI1     | 1.637795 | 1.098976 | 2.440793 | 0.015367 |
| SP100    | 1.82398  | 1.10043  | 3.023275 | 0.019745 |
| KLF6     | 0.923062 | 0.692456 | 1.230467 | 0.585155 |
| NEO1     | 1.110587 | 0.929311 | 1.327222 | 0.24865  |
| TRAM1    | 0.906824 | 0.562688 | 1.461432 | 0.68791  |
| PHKA1    | 1.089351 | 0.928107 | 1.278608 | 0.295047 |
| TNFRSF1A | 1.134556 | 0.701813 | 1.834132 | 0.606466 |
| CACNB1   | 1.359471 | 1.078295 | 1.713965 | 0.009388 |
| EVI5     | 1.009269 | 0.785577 | 1.296657 | 0.942466 |
| STOML1   | 0.895519 | 0.514917 | 1.557445 | 0.695923 |
| DHX29    | 1.107399 | 0.694616 | 1.765483 | 0.668152 |
| DNTTIP2  | 1.161569 | 0.760764 | 1.773538 | 0.487914 |
| TP53BP1  | 0.710722 | 0.518025 | 0.9751   | 0.034325 |
| TRO      | 1.113734 | 0.957799 | 1.295057 | 0.161604 |
| RRP15    | 0.809204 | 0.54445  | 1.202702 | 0.295061 |
| RHOA     | 1.852598 | 1.099889 | 3.120422 | 0.020456 |
| DHX8     | 1.181419 | 0.717621 | 1.944971 | 0.512183 |
| PRKCZ    | 1.142022 | 0.895358 | 1.45664  | 0.284769 |
| ZFY      | 0.980857 | 0.885008 | 1.087086 | 0.712565 |
| IARS2    | 1.308991 | 0.84575  | 2.025963 | 0.226966 |
| NAV3     | 0.843245 | 0.696019 | 1.021614 | 0.081589 |
| IDH3G    | 1.552458 | 1.056406 | 2.28144  | 0.025134 |
| ROGDI    | 1.100284 | 0.891768 | 1.357556 | 0.372685 |
| PDZD4    | 1.063393 | 0.842697 | 1.341887 | 0.604534 |
| ROCK1    | 0.896513 | 0.575558 | 1.396447 | 0.629003 |
| CBFB     | 1.229252 | 0.812403 | 1.859988 | 0.328678 |
| PDK3     | 0.952707 | 0.661356 | 1.37241  | 0.794755 |
| HYAL2    | 0.860669 | 0.626502 | 1.182361 | 0.354406 |
| HDAC4    | 0.936547 | 0.701012 | 1.25122  | 0.657366 |
| RASSF1   | 0.763583 | 0.502401 | 1.160545 | 0.206635 |
| FGFR3    | 0.891985 | 0.715613 | 1.111825 | 0.309192 |
| IFI35    | 1.779256 | 1.240008 | 2.55301  | 0.001762 |
| HEATR6   | 1.156419 | 0.729825 | 1.832366 | 0.536023 |
| COASY    | 1.608169 | 0.965616 | 2.678299 | 0.067922 |
| PLEKHH3  | 1.124344 | 0.890538 | 1.419534 | 0.324465 |
| MEF2A    | 0.853566 | 0.639512 | 1.139267 | 0.282445 |
| OTUD5    | 1.851369 | 1.082604 | 3.166038 | 0.024456 |

|         |          |          |          |          |
|---------|----------|----------|----------|----------|
| TFE3    | 1.696574 | 1.188555 | 2.421732 | 0.003599 |
| TBC1D25 | 1.056515 | 0.709727 | 1.572753 | 0.78652  |
| ACSL4   | 1.188846 | 0.835543 | 1.691539 | 0.336356 |
| INPP5A  | 1.184352 | 0.832693 | 1.684524 | 0.346536 |
| GPKOW   | 2.120778 | 1.166214 | 3.856668 | 0.013743 |
| GRIPAP1 | 1.199225 | 0.715907 | 2.008837 | 0.490048 |
| FTSJ1   | 2.224586 | 1.231026 | 4.020046 | 0.008087 |
| PRR11   | 1.188372 | 0.889442 | 1.587768 | 0.243035 |
| ATP11A  | 0.809094 | 0.611551 | 1.070449 | 0.137999 |
| POLR1A  | 1.098208 | 0.720818 | 1.673185 | 0.662781 |
| LAPTM4A | 0.870098 | 0.527571 | 1.43501  | 0.58568  |
| TTC7A   | 0.905515 | 0.640813 | 1.279558 | 0.573706 |
| IP6K2   | 0.802233 | 0.494918 | 1.300373 | 0.371231 |
| SRBD1   | 0.854764 | 0.553713 | 1.319495 | 0.478691 |
| KIF2A   | 0.792212 | 0.550356 | 1.140352 | 0.2101   |
| RASGRP2 | 1.207004 | 0.863464 | 1.687226 | 0.270927 |
| PSME4   | 0.909599 | 0.561635 | 1.473144 | 0.700112 |
| IFT80   | 1.274887 | 0.907824 | 1.790365 | 0.160981 |
| SIRT2   | 1.676464 | 1.085852 | 2.588319 | 0.019719 |
| PPP2R5B | 1.354133 | 0.949086 | 1.932044 | 0.094565 |
| PYGM    | 0.876232 | 0.598212 | 1.283464 | 0.497481 |
| PITX1   | 1.214171 | 1.045186 | 1.410479 | 0.011151 |
| MAST4   | 1.075155 | 0.869965 | 1.328743 | 0.502423 |
| SDK2    | 1.004661 | 0.900692 | 1.120631 | 0.933511 |
| NUP133  | 0.941132 | 0.607732 | 1.457435 | 0.785699 |
| NUCKS1  | 1.059526 | 0.716784 | 1.566155 | 0.771826 |
| VPS35   | 1.009583 | 0.62419  | 1.632928 | 0.96899  |
| DNAJA2  | 1.14822  | 0.645622 | 2.042078 | 0.637997 |
| BCL3    | 1.261234 | 1.020682 | 1.558479 | 0.03159  |
| KCNAB2  | 1.612768 | 1.122662 | 2.316834 | 0.00971  |
| GAL     | 1.047236 | 0.720264 | 1.52264  | 0.809025 |
| CLEC2D  | 0.953045 | 0.710232 | 1.27887  | 0.748561 |
| FUNDC1  | 1.390767 | 0.840629 | 2.300933 | 0.199099 |
| RORA    | 0.881477 | 0.665052 | 1.168333 | 0.380137 |
| DRD4    | 0.967863 | 0.745931 | 1.255826 | 0.805835 |
| TGFBR3  | 1.148757 | 0.88589  | 1.489624 | 0.295539 |
| PLA2G10 | 0.910035 | 0.63299  | 1.308335 | 0.610773 |
| ATP1B3  | 1.38858  | 0.949452 | 2.030806 | 0.090544 |
| NEDD4   | 0.833213 | 0.665314 | 1.043483 | 0.112006 |
| PIGB    | 0.736197 | 0.408705 | 1.326106 | 0.307745 |
| MAPK6   | 0.846614 | 0.54421  | 1.317055 | 0.460203 |
| GNB5    | 1.000448 | 0.777514 | 1.287302 | 0.997224 |
| RAB27A  | 0.816746 | 0.629975 | 1.058889 | 0.126504 |
| LRP6    | 0.966774 | 0.844249 | 1.107081 | 0.625053 |
| SCT     | 0.949044 | 0.745064 | 1.208868 | 0.67185  |
| PHRF1   | 1.183325 | 0.744868 | 1.879873 | 0.475998 |
| NUCB2   | 0.639655 | 0.498526 | 0.820737 | 0.000443 |
| PFN2    | 1.001294 | 0.693209 | 1.446303 | 0.994501 |
| SPTB    | 0.931594 | 0.796268 | 1.089918 | 0.376263 |
| DAPP1   | 1.266685 | 1.01405  | 1.582261 | 0.037261 |
| SLC44A1 | 1.21879  | 1.031942 | 1.439469 | 0.019792 |
| SMG6    | 0.795227 | 0.525461 | 1.203488 | 0.278445 |
| EXOC5   | 0.724536 | 0.467288 | 1.123402 | 0.149878 |
| CLTCL1  | 0.91721  | 0.807708 | 1.041558 | 0.182778 |
| FGF22   | 0.565744 | 0.247646 | 1.292434 | 0.176577 |
| FSTL3   | 0.73237  | 0.568793 | 0.942989 | 0.01573  |
| DGCR2   | 1.038389 | 0.668927 | 1.611911 | 0.866665 |
| RNF126  | 1.632436 | 1.123729 | 2.371433 | 0.010104 |

|          |          |          |          |          |
|----------|----------|----------|----------|----------|
| MNT      | 1.191022 | 0.755867 | 1.876699 | 0.45114  |
| ZXDC     | 1.044011 | 0.671723 | 1.62263  | 0.848191 |
| JMJD6    | 0.993667 | 0.707786 | 1.395017 | 0.970721 |
| POLB     | 0.846684 | 0.53     | 1.352593 | 0.486228 |
| ST6GALNA | 1.043246 | 0.769315 | 1.414716 | 0.785293 |
| WIPI1    | 0.932015 | 0.731632 | 1.18728  | 0.56864  |
| GBA2     | 1.410789 | 0.932788 | 2.133736 | 0.103027 |
| NDST1    | 0.805382 | 0.592504 | 1.094744 | 0.166977 |
| ASNS     | 0.672308 | 0.457188 | 0.988647 | 0.043592 |
| AP3M2    | 0.852494 | 0.578993 | 1.255189 | 0.418802 |
| ST6GALNA | 0.914078 | 0.650815 | 1.283834 | 0.604207 |
| PABPC1   | 1.227282 | 0.772371 | 1.950127 | 0.386057 |
| TESK2    | 1.214208 | 0.725497 | 2.032124 | 0.460101 |
| CSNK2A2  | 0.722439 | 0.409606 | 1.274196 | 0.261441 |
| EIF2B3   | 1.12348  | 0.692418 | 1.8229   | 0.637289 |
| CAMK2A   | 11.91446 | 3.807951 | 37.27842 | 2.07E-05 |
| TCOF1    | 1.393366 | 0.859055 | 2.260004 | 0.178851 |
| CDC42    | 1.369811 | 0.780371 | 2.404474 | 0.273022 |
| OSBPL3   | 1.14734  | 0.878873 | 1.497816 | 0.312202 |
| SLC12A3  | 1.657228 | 1.163696 | 2.360072 | 0.005104 |
| RAD18    | 0.897641 | 0.583138 | 1.381763 | 0.623661 |
| ATP2B1   | 0.989519 | 0.745444 | 1.313509 | 0.941877 |
| TRPM5    | 1.771706 | 0.887405 | 3.537214 | 0.104945 |
| NCK2     | 1.176599 | 0.770743 | 1.796168 | 0.451159 |
| MAP4K4   | 0.6323   | 0.466099 | 0.857764 | 0.003219 |
| MGAT4A   | 0.811035 | 0.618996 | 1.062653 | 0.128716 |
| RPL31    | 0.991212 | 0.659047 | 1.490789 | 0.966188 |
| WDR1     | 1.952314 | 1.201167 | 3.173187 | 0.006943 |
| SNX13    | 0.837019 | 0.57003  | 1.229058 | 0.364043 |
| ARHGAP10 | 0.775858 | 0.627853 | 0.958753 | 0.018773 |
| RPS6KA2  | 0.828559 | 0.703062 | 0.976457 | 0.024815 |
| ING3     | 0.775849 | 0.504662 | 1.192763 | 0.247422 |
| VASH1    | 1.295009 | 0.977343 | 1.715927 | 0.071804 |
| SEL1L    | 0.726063 | 0.485301 | 1.08627  | 0.119379 |
| TRIP13   | 1.192612 | 0.857061 | 1.659535 | 0.29605  |
| ATP6AP1  | 1.41359  | 0.95959  | 2.082387 | 0.079901 |
| TCF3     | 0.880741 | 0.647766 | 1.197508 | 0.417866 |
| TRIB2    | 0.871461 | 0.716924 | 1.05931  | 0.167143 |
| DAZAP1   | 0.771153 | 0.396006 | 1.501689 | 0.444726 |
| MBD3     | 1.244924 | 0.786511 | 1.970521 | 0.349783 |
| HLTF     | 0.827162 | 0.6218   | 1.10035  | 0.192505 |
| FAM50A   | 1.441324 | 1.055441 | 1.968292 | 0.021485 |
| FAM3A    | 1.335776 | 0.866676 | 2.058785 | 0.18963  |
| CPSF1    | 1.230299 | 0.898367 | 1.684874 | 0.196392 |
| CYBRD1   | 0.947606 | 0.699312 | 1.284056 | 0.728476 |
| PDCD2    | 1.322755 | 0.651859 | 2.684139 | 0.438497 |
| RDH11    | 1.148648 | 0.694911 | 1.898648 | 0.588865 |
| PRKACA   | 1.359056 | 0.974677 | 1.89502  | 0.070491 |
| ACTN1    | 0.915427 | 0.708167 | 1.183345 | 0.499892 |
| ZFYVE26  | 1.011199 | 0.639198 | 1.599696 | 0.962046 |
| EPN2     | 0.952846 | 0.717603 | 1.265208 | 0.738466 |
| PTPN18   | 1.195004 | 0.889801 | 1.604893 | 0.236417 |
| LIMS2    | 0.973102 | 0.624127 | 1.517204 | 0.904226 |
| LNX1     | 1.144472 | 0.745693 | 1.75651  | 0.536971 |
| ALDH3A2  | 1.107071 | 0.861489 | 1.42266  | 0.426687 |
| TFRC     | 0.853477 | 0.67471  | 1.079608 | 0.186431 |
| SREBF1   | 1.598011 | 1.200858 | 2.126511 | 0.001302 |
| TRPC5    | 0.787721 | 0.45     | 1.3789   | 0.403562 |



|          |          |          |          |          |
|----------|----------|----------|----------|----------|
| AFF4     | 0.649236 | 0.430292 | 0.979584 | 0.039566 |
| UBE2D1   | 1.179704 | 0.909153 | 1.530766 | 0.213723 |
| MPP5     | 0.586144 | 0.364142 | 0.943491 | 0.027845 |
| RHOBTB1  | 0.99928  | 0.840457 | 1.188117 | 0.993494 |
| SMC1A    | 1.126543 | 0.757125 | 1.676209 | 0.55674  |
| HSD17B10 | 2.026524 | 1.289571 | 3.184623 | 0.002194 |
| MARK2    | 1.578083 | 0.941039 | 2.646381 | 0.083707 |
| HMMR     | 0.839894 | 0.660125 | 1.068618 | 0.155641 |
| CHFR     | 0.997916 | 0.697121 | 1.428497 | 0.990903 |
| P4HA2    | 0.719356 | 0.447639 | 1.156006 | 0.173519 |
| FCGR2B   | 1.156905 | 0.948198 | 1.41155  | 0.151026 |
| NFATC3   | 0.771787 | 0.502222 | 1.18604  | 0.237339 |
| TRNT1    | 0.51865  | 0.343714 | 0.782621 | 0.001762 |
| ACADVL   | 1.210524 | 0.863295 | 1.697415 | 0.267995 |
| STK10    | 1.883264 | 1.290342 | 2.74864  | 0.001033 |
| FBXW11   | 1.115569 | 0.637528 | 1.952063 | 0.701648 |
| ACAP1    | 1.439679 | 0.989983 | 2.093648 | 0.056485 |
| CRMP1    | 0.728203 | 0.533992 | 0.993048 | 0.045066 |
| EVC      | 0.955384 | 0.78858  | 1.157472 | 0.641064 |
| DERL2    | 0.693392 | 0.344607 | 1.395189 | 0.304695 |
| SIDT1    | 1.066012 | 0.839529 | 1.353594 | 0.599878 |
| NDE1     | 1.197771 | 0.741437 | 1.934966 | 0.460851 |
| TMEM38A  | 0.975864 | 0.760794 | 1.251732 | 0.84747  |
| AP1M1    | 1.368733 | 0.861118 | 2.175581 | 0.184323 |
| PVR      | 1.023817 | 0.849915 | 1.233302 | 0.804271 |
| XRCC1    | 1.618599 | 0.91771  | 2.854784 | 0.096243 |
| SCARB1   | 1.080769 | 0.765661 | 1.525559 | 0.658735 |
| CYP2W1   | 0.964458 | 0.681718 | 1.364464 | 0.838014 |
| MCM2     | 1.308599 | 1.006645 | 1.701127 | 0.04449  |
| PANX2    | 1.041945 | 0.860145 | 1.26217  | 0.674482 |
| TP63     | 1.100634 | 0.85094  | 1.423596 | 0.465143 |
| ALPK1    | 0.849225 | 0.584316 | 1.234235 | 0.391591 |
| LLGL2    | 0.905543 | 0.695752 | 1.178593 | 0.460573 |
| PDE8A    | 0.585402 | 0.407985 | 0.83997  | 0.003654 |
| CLCN4    | 0.993776 | 0.792381 | 1.246358 | 0.956908 |
| NLE1     | 1.033031 | 0.722895 | 1.47622  | 0.858396 |
| SDHA     | 2.45569  | 1.320811 | 4.565691 | 0.004521 |
| SMARCE1  | 0.637435 | 0.381789 | 1.064262 | 0.085102 |
| GSDMB    | 0.754741 | 0.581786 | 0.979113 | 0.034097 |
| KDM5A    | 0.866277 | 0.52137  | 1.439351 | 0.579491 |
| ADAM11   | 1.023413 | 0.782605 | 1.338319 | 0.86573  |
| PPP2R3A  | 0.67805  | 0.441481 | 1.041386 | 0.075943 |
| FERMT2   | 0.895917 | 0.508845 | 1.577428 | 0.703358 |
| DHRS9    | 1.240587 | 1.085153 | 1.418284 | 0.001597 |
| CD5L     | 0.951153 | 0.798936 | 1.132371 | 0.573548 |
| PTGS2    | 1.063424 | 0.923538 | 1.224499 | 0.392789 |
| IGF2BP2  | 1.366707 | 1.06275  | 1.757598 | 0.014926 |
| MAP3K13  | 1.6969   | 1.08947  | 2.643    | 0.019336 |
| ST6GAL1  | 1.108818 | 0.796466 | 1.543666 | 0.540611 |
| TBX21    | 1.159297 | 0.949933 | 1.414806 | 0.1458   |
| FRY      | 0.838323 | 0.686568 | 1.02362  | 0.083481 |
| PICALM   | 0.98544  | 0.647335 | 1.500138 | 0.945459 |
| NSF      | 1.124629 | 0.734362 | 1.722298 | 0.589111 |
| CLASP1   | 0.67479  | 0.40355  | 1.128339 | 0.133711 |
| MRPS34   | 1.854132 | 1.212315 | 2.835737 | 0.004398 |
| NOTCH3   | 0.922706 | 0.779352 | 1.092427 | 0.350408 |
| CLNS1A   | 0.809213 | 0.481352 | 1.36039  | 0.424448 |
| TEAD2    | 0.925051 | 0.620516 | 1.379043 | 0.702159 |

|          |          |          |          |          |
|----------|----------|----------|----------|----------|
| EED      | 1.117717 | 0.629411 | 1.98486  | 0.704071 |
| TSG101   | 1.383911 | 0.742084 | 2.580853 | 0.306856 |
| ATP2A3   | 1.120626 | 0.845172 | 1.485854 | 0.428796 |
| MGLL     | 1.177644 | 1.001803 | 1.384351 | 0.047502 |
| BCS1L    | 1.336974 | 0.865514 | 2.065247 | 0.190546 |
| NUAK1    | 1.700766 | 0.810459 | 3.569095 | 0.160237 |
| DPP8     | 0.822306 | 0.472099 | 1.432299 | 0.489564 |
| SLC24A1  | 0.653501 | 0.447224 | 0.95492  | 0.027926 |
| ZNF532   | 1.340649 | 1.141506 | 1.574535 | 0.000353 |
| SCARF1   | 1.137575 | 0.917821 | 1.409945 | 0.239211 |
| LMAN1    | 0.677647 | 0.488696 | 0.939653 | 0.019639 |
| ZZEF1    | 0.918034 | 0.637642 | 1.321723 | 0.645579 |
| ENO1     | 2.208462 | 1.481273 | 3.292645 | 0.000101 |
| ANO8     | 1.100466 | 0.87599  | 1.382464 | 0.410806 |
| TUBE1    | 0.775362 | 0.508422 | 1.182455 | 0.237358 |
| ARHGEF1C | 1.165879 | 1.025857 | 1.325014 | 0.018722 |
| TXK      | 0.941804 | 0.763299 | 1.162054 | 0.57602  |
| TACR2    | 1.173203 | 0.810279 | 1.698679 | 0.397608 |
| ACTR6    | 0.980247 | 0.596319 | 1.611358 | 0.937291 |
| TIPIN    | 1.06416  | 0.679445 | 1.666706 | 0.785888 |
| SRI      | 1.159952 | 0.737014 | 1.825596 | 0.52137  |
| EIF4G3   | 0.84996  | 0.549664 | 1.314316 | 0.464788 |
| NUP37    | 1.309873 | 0.77803  | 2.205271 | 0.309814 |
| SEMA3A   | 1.18818  | 0.776287 | 1.818622 | 0.427234 |
| GTSE1    | 1.029008 | 0.77956  | 1.358277 | 0.840011 |
| SEMA3C   | 1.229015 | 1.015471 | 1.487465 | 0.034208 |
| TTC38    | 1.495863 | 1.086546 | 2.059374 | 0.013556 |
| ACAT1    | 1.185532 | 0.795333 | 1.767167 | 0.403367 |
| GRAMD4   | 1.005107 | 0.734187 | 1.376    | 0.974639 |
| CELSR1   | 0.97534  | 0.774696 | 1.22795  | 0.831727 |
| WNT8B    | 1.090926 | 0.729285 | 1.631898 | 0.671896 |
| ZNF638   | 0.655794 | 0.432791 | 0.993703 | 0.046618 |
| SLC25A40 | 0.626622 | 0.436813 | 0.898908 | 0.011122 |
| ADD2     | 0.961145 | 0.833141 | 1.108815 | 0.586809 |
| RASAL2   | 0.81301  | 0.644885 | 1.024966 | 0.079887 |
| ZNF37A   | 0.833268 | 0.564784 | 1.229381 | 0.357976 |
| MARK3    | 0.695494 | 0.391014 | 1.237072 | 0.216498 |
| SLC25A3  | 1.560272 | 0.851862 | 2.857799 | 0.149664 |
| FNDC3B   | 0.552201 | 0.406656 | 0.749837 | 0.000142 |
| FOSL2    | 1.077814 | 0.866307 | 1.340959 | 0.501378 |
| CACNG4   | 1.21524  | 1.012653 | 1.458356 | 0.036162 |
| FRYL     | 0.535106 | 0.341542 | 0.83837  | 0.006342 |
| TMEM131  | 0.944633 | 0.530763 | 1.681226 | 0.846449 |
| FSCN1    | 0.983476 | 0.847353 | 1.141466 | 0.826482 |
| ACTB     | 1.439206 | 1.020271 | 2.030159 | 0.038052 |
| PLD1     | 0.764842 | 0.624532 | 0.936676 | 0.009525 |
| WDR62    | 1.075762 | 0.786742 | 1.470957 | 0.647334 |
| DLG1     | 0.549448 | 0.337035 | 0.895734 | 0.016326 |
| RAB7A    | 1.829625 | 0.93574  | 3.577412 | 0.077425 |
| BCAP29   | 0.523763 | 0.240374 | 1.141254 | 0.103638 |
| SEC31B   | 1.038026 | 0.734278 | 1.467424 | 0.832659 |
| SART3    | 1.236456 | 0.625586 | 2.443825 | 0.541474 |
| ARHGAP11 | 0.949141 | 0.595998 | 1.511528 | 0.825978 |
| TUBA3D   | 1.059527 | 0.749712 | 1.497372 | 0.743176 |
| EXOSC7   | 0.940896 | 0.510054 | 1.735668 | 0.845386 |
| KIFAP3   | 1.016742 | 0.739926 | 1.397117 | 0.918445 |
| MKRN2    | 0.679106 | 0.404179 | 1.141042 | 0.143846 |
| MCM6     | 1.17139  | 0.868614 | 1.579706 | 0.299834 |

|          |          |          |          |          |
|----------|----------|----------|----------|----------|
| REXO2    | 0.899982 | 0.663907 | 1.220003 | 0.497207 |
| RBM7     | 0.914888 | 0.508023 | 1.647603 | 0.766949 |
| RBMS2    | 0.882337 | 0.655845 | 1.187046 | 0.408196 |
| BAZ2A    | 1.05971  | 0.646857 | 1.736064 | 0.817879 |
| PTPN23   | 1.109134 | 0.745533 | 1.650064 | 0.609307 |
| MLH1     | 1.180229 | 0.651682 | 2.137455 | 0.584475 |
| UNG      | 1.190003 | 0.844539 | 1.67678  | 0.320102 |
| FMO4     | 1.043328 | 0.698604 | 1.558155 | 0.8358   |
| KLHL20   | 0.904737 | 0.503833 | 1.624643 | 0.737489 |
| SLC46A1  | 1.501519 | 0.989755 | 2.277896 | 0.055936 |
| PLXNA2   | 1.065628 | 0.808681 | 1.404215 | 0.65161  |
| SPAG5    | 1.019596 | 0.746804 | 1.392034 | 0.902769 |
| ANKRD13  | 1.587949 | 0.984288 | 2.561834 | 0.058083 |
| TPD52    | 1.251765 | 1.003712 | 1.561121 | 0.046278 |
| ACACB    | 0.843941 | 0.665335 | 1.070493 | 0.161963 |
| TRAF4    | 0.970927 | 0.76529  | 1.231819 | 0.808027 |
| PAG1     | 1.059428 | 0.840636 | 1.335163 | 0.624755 |
| GPATCH1  | 0.914457 | 0.504803 | 1.656551 | 0.768005 |
| ICAM3    | 1.469012 | 1.110129 | 1.943916 | 0.007124 |
| NT5C2    | 0.558902 | 0.367941 | 0.848973 | 0.00638  |
| MCAM     | 0.809155 | 0.596765 | 1.097137 | 0.17282  |
| GPC4     | 1.095808 | 0.939343 | 1.278336 | 0.244457 |
| MBNL3    | 0.821994 | 0.594969 | 1.135647 | 0.234583 |
| RAP1GAP  | 0.962511 | 0.751249 | 1.233183 | 0.762494 |
| XAB2     | 1.446718 | 0.984393 | 2.126177 | 0.060123 |
| ARHGEF1  | 1.607152 | 1.15319  | 2.239819 | 0.005085 |
| STXBP2   | 1.245178 | 0.950148 | 1.631817 | 0.111987 |
| MAP2K7   | 1.161823 | 0.667602 | 2.02191  | 0.595703 |
| DGKD     | 1.03913  | 0.754366 | 1.43139  | 0.814281 |
| RARB     | 0.846834 | 0.571889 | 1.253963 | 0.40651  |
| TOP2B    | 0.670566 | 0.469894 | 0.956935 | 0.027625 |
| TM9SF3   | 0.766341 | 0.482999 | 1.215901 | 0.258497 |
| NFKB2    | 1.364759 | 1.082426 | 1.720734 | 0.008545 |
| UBE2T    | 1.130999 | 0.813975 | 1.571498 | 0.463242 |
| PPP1R12B | 0.934345 | 0.582284 | 1.499271 | 0.778356 |
| DNAJC10  | 1.832227 | 1.111963 | 3.019036 | 0.017479 |
| GTF3C1   | 1.513151 | 0.901991 | 2.538411 | 0.116606 |
| IL4R     | 1.130073 | 0.887269 | 1.439321 | 0.321773 |
| USP33    | 0.686135 | 0.417543 | 1.127502 | 0.137169 |
| SNRPA    | 1.503126 | 0.938703 | 2.406925 | 0.089768 |
| SPAG6    | 1.074262 | 0.958643 | 1.203825 | 0.217581 |
| EXOSC5   | 1.395455 | 0.945969 | 2.058517 | 0.092971 |
| DYNC112  | 0.945533 | 0.557631 | 1.603268 | 0.835323 |
| APBB1IP  | 1.577412 | 1.027744 | 2.421061 | 0.037055 |
| LRCH4    | 0.865488 | 0.608041 | 1.231938 | 0.422563 |
| FAM76B   | 0.855191 | 0.499759 | 1.463408 | 0.568178 |
| SIRT6    | 1.798757 | 1.196333 | 2.704538 | 0.004781 |
| POLD3    | 1.328201 | 0.843326 | 2.091859 | 0.220692 |
| CAPZB    | 2.513919 | 1.467304 | 4.307076 | 0.000792 |
| GPR137B  | 1.070467 | 0.854572 | 1.340905 | 0.553507 |
| NAALAD2  | 0.971067 | 0.650613 | 1.449356 | 0.885745 |
| SLC25A43 | 1.075409 | 0.675712 | 1.711533 | 0.759119 |
| UBE2A    | 1.409784 | 0.675504 | 2.942234 | 0.360243 |
| FGFR1    | 0.862385 | 0.750325 | 0.991181 | 0.037098 |
| SMC1B    | 0.932677 | 0.717581 | 1.21225  | 0.602343 |
| FBLN1    | 0.800207 | 0.635531 | 1.007552 | 0.057965 |
| CST7     | 0.90585  | 0.806386 | 1.017581 | 0.095659 |
| PIAS2    | 0.645232 | 0.430364 | 0.967376 | 0.033965 |

|          |          |          |          |          |
|----------|----------|----------|----------|----------|
| AMPH     | 1.208667 | 0.95432  | 1.530804 | 0.115926 |
| ARAF     | 1.467341 | 0.887804 | 2.425186 | 0.134717 |
| MCCC1    | 1.037065 | 0.653867 | 1.644837 | 0.877096 |
| LAMP3    | 1.718552 | 1.114647 | 2.649648 | 0.014233 |
| ACER3    | 1.425084 | 1.035066 | 1.962062 | 0.029915 |
| UBE2K    | 0.840362 | 0.481625 | 1.466306 | 0.5403   |
| PIK3C3   | 0.820297 | 0.514337 | 1.308262 | 0.405555 |
| N4BP2    | 0.720902 | 0.505476 | 1.028141 | 0.070802 |
| TULP3    | 0.765074 | 0.459887 | 1.272788 | 0.302474 |
| SYNJ2    | 1.111657 | 0.897728 | 1.376565 | 0.331725 |
| PPP2R5C  | 1.553084 | 0.883145 | 2.731229 | 0.126385 |
| GNB1     | 1.871412 | 0.994393 | 3.52193  | 0.052072 |
| HOXA9    | 1.191805 | 1.087711 | 1.30586  | 0.000168 |
| EDN1     | 2.090877 | 1.26055  | 3.468142 | 0.00428  |
| MLLT10   | 0.650175 | 0.387723 | 1.09028  | 0.102626 |
| ZCWPW1   | 0.848757 | 0.615347 | 1.170703 | 0.317593 |
| P2RY10   | 1.005001 | 0.795858 | 1.269106 | 0.966574 |
| ITM2A    | 0.874776 | 0.78801  | 0.971096 | 0.012063 |
| VDAC3    | 1.074952 | 0.646939 | 1.786138 | 0.780262 |
| PCM1     | 0.630191 | 0.414597 | 0.957895 | 0.03067  |
| TNRC6C   | 0.774016 | 0.570215 | 1.050659 | 0.100382 |
| CBFA2T2  | 0.605307 | 0.343236 | 1.067479 | 0.082853 |
| ITCH     | 0.761672 | 0.442582 | 1.310816 | 0.325681 |
| PKD2L2   | 0.776869 | 0.540146 | 1.117337 | 0.173315 |
| TP53INP2 | 1.069852 | 0.939394 | 1.218427 | 0.308837 |
| SDF4     | 1.232836 | 0.829104 | 1.833164 | 0.301091 |
| MYH7B    | 0.872337 | 0.600747 | 1.26671  | 0.472965 |
| TP73     | 1.050712 | 0.828109 | 1.333154 | 0.683829 |
| TOLLIP   | 1.488521 | 0.976821 | 2.268272 | 0.064192 |
| UBE2D4   | 0.81564  | 0.470211 | 1.414828 | 0.46836  |
| RUNX1T1  | 0.951987 | 0.804451 | 1.126582 | 0.56685  |
| THOC1    | 0.556795 | 0.363289 | 0.853373 | 0.007193 |
| FKBP7    | 0.712052 | 0.499776 | 1.01449  | 0.060066 |
| OSBPL6   | 1.094048 | 0.742988 | 1.610983 | 0.648916 |
| SLC1A3   | 1.023258 | 0.8443   | 1.240149 | 0.814663 |
| XRCC5    | 1.210968 | 0.764117 | 1.919136 | 0.415188 |
| LXN      | 1.135344 | 0.876143 | 1.471228 | 0.337065 |
| SP140    | 1.016687 | 0.793109 | 1.303292 | 0.896085 |
| MKMK1    | 1.079427 | 0.775674 | 1.50213  | 0.65032  |
| TNS1     | 1.052939 | 0.875518 | 1.266314 | 0.583744 |
| REXO1    | 0.962408 | 0.661139 | 1.40096  | 0.841471 |
| SAR1A    | 1.07838  | 0.604694 | 1.923128 | 0.798212 |
| CDC14A   | 0.876693 | 0.508544 | 1.511355 | 0.635781 |
| RAPGEF3  | 1.263744 | 0.973655 | 1.640261 | 0.078525 |
| CEACAM1  | 1.070196 | 0.901599 | 1.270322 | 0.437955 |
| SENP1    | 1.077568 | 0.657714 | 1.765437 | 0.766782 |
| DUSP13   | 0.678054 | 0.255001 | 1.802963 | 0.436178 |
| CIC      | 1.332745 | 0.949672 | 1.870339 | 0.096652 |
| LIPE     | 1.142024 | 0.830532 | 1.570341 | 0.413785 |
| FDFT1    | 1.104067 | 0.715695 | 1.703191 | 0.654438 |
| PAFAH1B3 | 1.437231 | 0.99637  | 2.073159 | 0.052318 |
| OPHN1    | 1.068618 | 0.832026 | 1.372485 | 0.603227 |
| KIF22    | 1.236411 | 0.815748 | 1.874    | 0.317232 |
| PGM1     | 1.255889 | 0.96143  | 1.640533 | 0.094638 |
| DDX1     | 1.181953 | 0.750256 | 1.862049 | 0.470987 |
| DNM2     | 1.179295 | 0.787054 | 1.767018 | 0.424096 |
| EPB41L2  | 1.25713  | 1.08648  | 1.454584 | 0.00211  |
| STX7     | 1.036465 | 0.702071 | 1.530128 | 0.85699  |

|          |          |          |          |          |
|----------|----------|----------|----------|----------|
| RABL2B   | 0.698765 | 0.433492 | 1.126372 | 0.141171 |
| KEAP1    | 1.548732 | 1.041788 | 2.302361 | 0.030593 |
| DDX43    | 1.105484 | 0.822731 | 1.485411 | 0.505824 |
| PTPRH    | 1.084032 | 0.834014 | 1.409    | 0.5464   |
| SLC35C2  | 0.734665 | 0.512493 | 1.053151 | 0.093324 |
| CRYBG3   | 1.049648 | 0.876198 | 1.257432 | 0.599024 |
| RFX3     | 0.794704 | 0.543278 | 1.162489 | 0.236373 |
| RIF1     | 0.635403 | 0.430726 | 0.93734  | 0.022244 |
| RAB21    | 1.188561 | 0.687024 | 2.056227 | 0.536784 |
| SLC4A4   | 0.976106 | 0.737476 | 1.29195  | 0.86573  |
| SMARCA2  | 0.896679 | 0.578776 | 1.389195 | 0.62537  |
| SESN1    | 1.493822 | 1.150339 | 1.939867 | 0.002608 |
| MID2     | 0.907412 | 0.653306 | 1.260352 | 0.562183 |
| SRCAP    | 0.767482 | 0.421604 | 1.397116 | 0.386575 |
| KCNN2    | 2.497696 | 1.384933 | 4.504542 | 0.002348 |
| CNOT4    | 0.532295 | 0.298293 | 0.949864 | 0.032839 |
| PSEN1    | 0.970765 | 0.612978 | 1.537388 | 0.899345 |
| CPOX     | 0.997621 | 0.724803 | 1.373128 | 0.988342 |
| CLDND1   | 0.818583 | 0.44693  | 1.499293 | 0.516779 |
| HSP90AA1 | 1.136889 | 0.795083 | 1.625639 | 0.481953 |
| RBL1     | 1.026313 | 0.719397 | 1.464168 | 0.886076 |
| DLGAP4   | 0.751195 | 0.492648 | 1.145431 | 0.183802 |
| IGSF9B   | 0.810038 | 0.659998 | 0.994187 | 0.043827 |
| NDC80    | 0.934049 | 0.698854 | 1.248397 | 0.64482  |
| AP4E1    | 0.87171  | 0.547388 | 1.388189 | 0.563035 |
| RSBN1    | 0.7019   | 0.411066 | 1.198505 | 0.194752 |
| MAGI3    | 0.798471 | 0.572957 | 1.112748 | 0.183826 |
| CXCL2    | 1.066639 | 0.920593 | 1.235854 | 0.390508 |
| COL4A4   | 1.33318  | 0.73628  | 2.413985 | 0.342459 |
| TCF7     | 0.893924 | 0.704599 | 1.134119 | 0.355756 |
| OSTM1    | 0.987611 | 0.691032 | 1.411477 | 0.94545  |
| IMPG2    | 1.113912 | 0.684409 | 1.812951 | 0.664219 |
| PCNP     | 1.058542 | 0.617353 | 1.815027 | 0.836167 |
| EXD2     | 0.872594 | 0.647979 | 1.17507  | 0.369442 |
| ARG2     | 1.230432 | 0.843088 | 1.795734 | 0.282344 |
| MEF2C    | 1.253546 | 1.043873 | 1.505334 | 0.015532 |
| PTPRC    | 1.297578 | 0.971663 | 1.732811 | 0.077534 |
| UBA5     | 0.684552 | 0.431614 | 1.085718 | 0.107292 |
| STK17B   | 0.88626  | 0.674849 | 1.163901 | 0.385181 |
| CDC14B   | 0.759135 | 0.51999  | 1.108263 | 0.153439 |
| ZNF510   | 0.937654 | 0.640908 | 1.371796 | 0.740193 |
| ZNF506   | 0.704646 | 0.512902 | 0.968071 | 0.030756 |
| JMJD4    | 1.87818  | 1.05564  | 3.34163  | 0.03202  |
| DUSP12   | 0.901919 | 0.520559 | 1.56266  | 0.712781 |
| AACS     | 0.955579 | 0.643219 | 1.419627 | 0.82199  |
| PHLPP1   | 1.028311 | 0.77611  | 1.362465 | 0.845816 |
| ATP8B1   | 0.782284 | 0.598687 | 1.022184 | 0.07199  |
| IL12RB2  | 1.096382 | 0.956063 | 1.257295 | 0.187868 |
| SMARCD3  | 0.93359  | 0.77868  | 1.119318 | 0.457892 |
| WDR70    | 0.854322 | 0.45296  | 1.611326 | 0.62672  |
| STRADB   | 1.023954 | 0.716408 | 1.463527 | 0.896649 |
| BZW1     | 0.760056 | 0.471592 | 1.224968 | 0.259876 |
| C1QTNF3  | 0.482072 | 0.322524 | 0.720547 | 0.000373 |
| ME2      | 0.997872 | 0.620623 | 1.604436 | 0.992986 |
| CCNT2    | 0.621859 | 0.376004 | 1.02847  | 0.064227 |
| FAM135A  | 0.835181 | 0.630122 | 1.106971 | 0.210219 |
| COL19A1  | 0.739951 | 0.433229 | 1.26383  | 0.270166 |
| EPB41L3  | 1.16196  | 1.014741 | 1.330539 | 0.029881 |

|          |          |          |          |          |
|----------|----------|----------|----------|----------|
| COBLL1   | 1.051164 | 0.897394 | 1.231282 | 0.536339 |
| DLG3     | 1.140972 | 0.882088 | 1.475835 | 0.315176 |
| TRAF5    | 1.02344  | 0.821219 | 1.275455 | 0.836568 |
| MRPL22   | 0.747348 | 0.364825 | 1.530953 | 0.42606  |
| GEMIN5   | 0.832074 | 0.598109 | 1.15756  | 0.275118 |
| NFE2L1   | 1.317671 | 0.803578 | 2.160659 | 0.274263 |
| GSK3B    | 0.810557 | 0.48325  | 1.359551 | 0.426058 |
| ITGB5    | 1.073089 | 0.848313 | 1.357425 | 0.556386 |
| ERC1     | 0.824838 | 0.519015 | 1.310864 | 0.415228 |
| XPO1     | 0.799992 | 0.490172 | 1.305638 | 0.371921 |
| RNF13    | 1.275865 | 0.887933 | 1.833282 | 0.187743 |
| PALB2    | 1.083502 | 0.695592 | 1.687738 | 0.722837 |
| LYRM2    | 1.527354 | 0.83489  | 2.794153 | 0.169323 |
| BCKDHB   | 0.661    | 0.456675 | 0.956743 | 0.028211 |
| ULK2     | 1.141801 | 0.92654  | 1.407073 | 0.213451 |
| TNPO1    | 0.814617 | 0.535619 | 1.238942 | 0.337845 |
| PLOD1    | 1.242898 | 0.934976 | 1.65223  | 0.134375 |
| P2RX5    | 0.833755 | 0.672045 | 1.034375 | 0.098384 |
| ITGAE    | 1.096467 | 0.801479 | 1.500028 | 0.564642 |
| DIS3     | 1.014135 | 0.618298 | 1.66339  | 0.955663 |
| PIBF1    | 0.604271 | 0.405184 | 0.901179 | 0.013503 |
| TDRD3    | 0.559578 | 0.329803 | 0.949437 | 0.031372 |
| NUFIP1   | 0.87435  | 0.548992 | 1.392531 | 0.571747 |
| PDS5B    | 0.729159 | 0.44791  | 1.187007 | 0.20393  |
| OXCT1    | 1.375713 | 1.055209 | 1.793566 | 0.01842  |
| RRAGB    | 0.974303 | 0.690727 | 1.374299 | 0.882077 |
| CYLD     | 1.306652 | 0.798725 | 2.13758  | 0.286851 |
| SLC27A5  | 1.049714 | 0.625769 | 1.760873 | 0.854147 |
| ZNF324   | 0.969658 | 0.574894 | 1.635496 | 0.90803  |
| ZNF671   | 0.901543 | 0.649165 | 1.252039 | 0.536211 |
| ZNF416   | 0.974394 | 0.675286 | 1.405989 | 0.889727 |
| ZNF586   | 0.824963 | 0.537852 | 1.265339 | 0.37797  |
| ZNF446   | 0.799596 | 0.515585 | 1.240056 | 0.317821 |
| ZNF264   | 0.850777 | 0.583323 | 1.240858 | 0.401328 |
| RPS5     | 1.176536 | 0.849618 | 1.629246 | 0.32768  |
| FAT1     | 1.000749 | 0.741175 | 1.351232 | 0.996099 |
| YTHDC1   | 0.712608 | 0.392654 | 1.293277 | 0.265182 |
| CHMP2B   | 1.107772 | 0.736073 | 1.667168 | 0.62361  |
| SMAP2    | 1.445214 | 1.113477 | 1.875786 | 0.005643 |
| PIIE     | 1.159167 | 0.73209  | 1.835386 | 0.528735 |
| ZMPSTE24 | 0.971885 | 0.602063 | 1.568874 | 0.907083 |
| STARD7   | 1.752967 | 1.017577 | 3.019814 | 0.043098 |
| REST     | 0.775943 | 0.533512 | 1.128537 | 0.184417 |
| HAL      | 0.882247 | 0.762513 | 1.020782 | 0.092266 |
| SSH1     | 1.06595  | 0.67495  | 1.683458 | 0.784147 |
| GSTP1    | 1.77349  | 1.247212 | 2.521839 | 0.001423 |
| APLP2    | 1.073188 | 0.850615 | 1.354001 | 0.55143  |
| WBP11    | 0.998325 | 0.588413 | 1.693797 | 0.99504  |
| EIF3I    | 1.844108 | 1.05683  | 3.217864 | 0.031197 |
| TXLNA    | 0.98351  | 0.556526 | 1.738087 | 0.954359 |
| NCOA1    | 0.856734 | 0.553073 | 1.327118 | 0.488622 |
| AGBL5    | 0.860571 | 0.548548 | 1.350078 | 0.513403 |
| EFR3B    | 0.823619 | 0.6259   | 1.083798 | 0.165922 |
| KIF3C    | 1.05857  | 0.757557 | 1.47919  | 0.738807 |
| RAB10    | 1.105057 | 0.689948 | 1.769915 | 0.677654 |
| HADHA    | 1.306613 | 0.826655 | 2.065235 | 0.252225 |
| MAPRE3   | 1.098443 | 0.822406 | 1.46713  | 0.524867 |
| CAD      | 1.179457 | 0.839185 | 1.657701 | 0.341902 |

|          |          |          |          |          |
|----------|----------|----------|----------|----------|
| CD59     | 1.036336 | 0.871315 | 1.23261  | 0.686712 |
| CD82     | 1.136148 | 0.87272  | 1.47909  | 0.342919 |
| BCORL1   | 1.212239 | 0.863765 | 1.701298 | 0.265695 |
| ATRX     | 0.932232 | 0.635968 | 1.366512 | 0.71912  |
| FCN1     | 1.066388 | 0.972107 | 1.169814 | 0.173522 |
| MYNN     | 0.691019 | 0.411719 | 1.159791 | 0.161849 |
| SCAMP1   | 0.624177 | 0.417905 | 0.932264 | 0.0213   |
| PREP     | 1.263016 | 0.673001 | 2.370292 | 0.467224 |
| HACE1    | 0.559622 | 0.380713 | 0.822604 | 0.003141 |
| SEH1L    | 0.671245 | 0.418715 | 1.076076 | 0.09783  |
| WDR47    | 0.750252 | 0.445543 | 1.263354 | 0.279816 |
| WDFY1    | 1.154084 | 0.794788 | 1.675805 | 0.451423 |
| OVGP1    | 1.23217  | 0.884075 | 1.717324 | 0.217743 |
| SLC25A24 | 1.226606 | 0.945367 | 1.591513 | 0.124257 |
| MAP3K4   | 0.738822 | 0.454762 | 1.200318 | 0.221505 |
| PILRA    | 1.025225 | 0.866923 | 1.212432 | 0.770956 |
| IGSF9    | 1.215768 | 0.690979 | 2.139128 | 0.497945 |
| ABCB1    | 1.006849 | 0.877291 | 1.15554  | 0.92263  |
| ZNF213   | 1.448039 | 0.972788 | 2.15547  | 0.068147 |
| AKR1B1   | 1.556501 | 1.196522 | 2.024781 | 0.000977 |
| CPNE3    | 1.27017  | 1.010553 | 1.596484 | 0.04037  |
| RRN3     | 1.306092 | 0.85442  | 1.996532 | 0.217456 |
| CTTN     | 1.055972 | 0.840421 | 1.326809 | 0.640122 |
| WNT11    | 0.964759 | 0.757801 | 1.228238 | 0.770883 |
| MTIF2    | 0.89512  | 0.569817 | 1.406136 | 0.630645 |
| DDHD2    | 0.865463 | 0.575864 | 1.3007   | 0.486966 |
| TTC39A   | 1.187174 | 0.736314 | 1.914106 | 0.481433 |
| EPS15    | 0.843015 | 0.572511 | 1.241328 | 0.387052 |
| MGST2    | 1.707791 | 1.209659 | 2.411053 | 0.002352 |
| CHERP    | 0.962497 | 0.65015  | 1.424902 | 0.848557 |
| ATG16L1  | 0.89376  | 0.50442  | 1.583614 | 0.700355 |
| USP40    | 1.027024 | 0.756913 | 1.393527 | 0.864021 |
| POMGNT1  | 1.256207 | 0.794357 | 1.986585 | 0.329344 |
| RAD54L   | 1.154372 | 0.777272 | 1.714423 | 0.47685  |
| MAST2    | 1.419699 | 0.960966 | 2.097417 | 0.078408 |
| DNAJA1   | 1.241236 | 0.786125 | 1.959825 | 0.353747 |
| B4GALT1  | 1.609596 | 1.116871 | 2.319695 | 0.010687 |
| CHMP5    | 1.428536 | 0.8545   | 2.388198 | 0.173748 |
| NFX1     | 1.520338 | 0.881702 | 2.621555 | 0.131798 |
| IPO11    | 0.778063 | 0.507024 | 1.19399  | 0.250757 |
| EIF2AK1  | 1.020279 | 0.652612 | 1.595081 | 0.92983  |
| EPDR1    | 0.880961 | 0.697991 | 1.111895 | 0.285964 |
| SNX10    | 1.186756 | 0.988694 | 1.424495 | 0.066075 |
| SEPHS1   | 0.958051 | 0.544495 | 1.685711 | 0.88183  |
| MRPL28   | 2.160246 | 1.346482 | 3.465819 | 0.001406 |
| HBQ1     | 1.023359 | 0.824034 | 1.270899 | 0.834523 |
| ITPKC    | 1.520371 | 0.933487 | 2.476227 | 0.092296 |
| CEACAM6  | 1.028328 | 0.900329 | 1.174525 | 0.680432 |
| FAT2     | 0.626272 | 0.420538 | 0.932656 | 0.021274 |
| RBM22    | 0.959047 | 0.544686 | 1.688625 | 0.884815 |
| TMED2    | 0.773172 | 0.439412 | 1.360443 | 0.372231 |
| ZFAND6   | 0.856755 | 0.492322 | 1.490953 | 0.584418 |
| PPEF1    | 1.315283 | 0.441418 | 3.919115 | 0.622746 |
| LAT2     | 1.232116 | 1.004404 | 1.511454 | 0.045273 |
| HUWE1    | 1.123005 | 0.737481 | 1.710063 | 0.588723 |
| ZW10     | 0.968007 | 0.595241 | 1.574216 | 0.895729 |
| ALG9     | 0.696238 | 0.415906 | 1.165521 | 0.168418 |
| MYBPC2   | 1.380985 | 0.944864 | 2.018408 | 0.095501 |

|          |          |          |          |          |
|----------|----------|----------|----------|----------|
| ACOX3    | 1.233644 | 0.722973 | 2.105025 | 0.441206 |
| MTMR2    | 0.720251 | 0.447442 | 1.159391 | 0.176676 |
| PPP1R15A | 0.905792 | 0.662589 | 1.238263 | 0.53508  |
| HSD17B14 | 0.990885 | 0.765106 | 1.28329  | 0.944667 |
| TRIP6    | 1.267647 | 1.014621 | 1.583772 | 0.036821 |
| ACHE     | 0.853423 | 0.694462 | 1.04877  | 0.131769 |
| FTL      | 1.29792  | 0.974167 | 1.72927  | 0.074882 |
| BAX      | 1.30794  | 0.85727  | 1.995528 | 0.212957 |
| NLK      | 0.943227 | 0.689793 | 1.289774 | 0.714296 |
| PIGS     | 1.12722  | 0.658691 | 1.929016 | 0.662201 |
| ADAMTS2  | 0.97256  | 0.858876 | 1.101291 | 0.660877 |
| ATXN7L3  | 1.290651 | 0.776482 | 2.145291 | 0.325039 |
| PGS1     | 0.945464 | 0.619115 | 1.443838 | 0.795165 |
| PSMC5    | 1.458531 | 0.860867 | 2.471128 | 0.160604 |
| UIMC1    | 0.910408 | 0.502908 | 1.6481   | 0.756578 |
| CETP     | 0.975344 | 0.790072 | 1.204063 | 0.816332 |
| MMP2     | 0.875833 | 0.78926  | 0.971901 | 0.012536 |
| LPCAT2   | 0.788304 | 0.614444 | 1.011359 | 0.061329 |
| OGFOD1   | 1.275277 | 0.734823 | 2.213228 | 0.387311 |
| SH3BP2   | 1.372488 | 1.061666 | 1.77431  | 0.015662 |
| NOP14    | 1.264233 | 0.747132 | 2.139229 | 0.382285 |
| ADD1     | 1.483391 | 0.847495 | 2.596416 | 0.167395 |
| L2HGDH   | 1.102423 | 0.708257 | 1.715953 | 0.665783 |
| TXNDC16  | 1.029586 | 0.718604 | 1.475148 | 0.873737 |
| NID2     | 0.927523 | 0.669746 | 1.284513 | 0.650639 |
| GMCL1    | 0.440061 | 0.281036 | 0.689069 | 0.000334 |
| SF3B2    | 2.145266 | 1.107189 | 4.156621 | 0.023717 |
| GNAS     | 1.648551 | 0.970178 | 2.801261 | 0.064597 |
| DNM1L    | 0.933122 | 0.548828 | 1.586503 | 0.79825  |
| PHACTR3  | 1.170608 | 0.991681 | 1.38182  | 0.062709 |
| ERGIC2   | 0.582221 | 0.367088 | 0.923433 | 0.021536 |
| AURKA    | 0.935605 | 0.710597 | 1.231861 | 0.635326 |
| CASS4    | 1.30388  | 1.049256 | 1.620294 | 0.016679 |
| PIR      | 1.022799 | 0.834272 | 1.253928 | 0.828316 |
| RFX2     | 1.139602 | 0.855122 | 1.518721 | 0.37248  |
| METTL2A  | 0.840527 | 0.495841 | 1.424824 | 0.518826 |
| SULT2B1  | 1.170876 | 0.970849 | 1.412117 | 0.098852 |
| ALG6     | 0.589968 | 0.351533 | 0.990127 | 0.045768 |
| CNOT3    | 1.276205 | 0.768703 | 2.11876  | 0.34571  |
| GP6      | 1.157663 | 0.969336 | 1.382578 | 0.106058 |
| PTPN4    | 0.76843  | 0.535199 | 1.103298 | 0.153495 |
| DDX18    | 0.92089  | 0.587154 | 1.444322 | 0.719662 |
| KHSRP    | 1.191769 | 0.753193 | 1.885725 | 0.45365  |
| GNA11    | 0.859098 | 0.650847 | 1.133983 | 0.28361  |
| EDEM2    | 1.159317 | 0.710421 | 1.891858 | 0.554092 |
| DNMT3B   | 1.151205 | 0.960762 | 1.379398 | 0.126979 |
| TPX2     | 1.051185 | 0.810989 | 1.362521 | 0.70607  |
| FER1L4   | 0.972944 | 0.721017 | 1.312895 | 0.857622 |
| PDRG1    | 1.909251 | 1.163316 | 3.133489 | 0.010515 |
| EPB41L1  | 0.69546  | 0.411992 | 1.173964 | 0.173968 |
| DOCK9    | 1.076088 | 0.850162 | 1.362053 | 0.541928 |
| ANKRD10  | 0.8638   | 0.548576 | 1.360159 | 0.527346 |
| TGDS     | 0.923533 | 0.569011 | 1.498938 | 0.747504 |
| DOCK3    | 1.014141 | 0.825397 | 1.246045 | 0.893684 |
| COQ9     | 1.754006 | 0.966206 | 3.184143 | 0.064753 |
| TMEM40   | 1.286615 | 0.942408 | 1.75654  | 0.112618 |
| KIF9     | 0.692999 | 0.4497   | 1.067927 | 0.096492 |
| CRLS1    | 0.574745 | 0.273451 | 1.208011 | 0.143924 |



|          |          |          |          |          |
|----------|----------|----------|----------|----------|
| PPP1R13B | 0.870333 | 0.653064 | 1.159886 | 0.343251 |
| ATRN     | 1.134597 | 0.717881 | 1.79321  | 0.588705 |
| SMOX     | 1.029075 | 0.819796 | 1.29178  | 0.804855 |
| SIGLEC1  | 1.148699 | 1.015033 | 1.299966 | 0.028066 |
| FKBP1A   | 2.340197 | 1.33683  | 4.096649 | 0.002919 |
| NSFL1C   | 1.024414 | 0.619364 | 1.694357 | 0.925146 |
| SLC4A11  | 0.936913 | 0.743688 | 1.180342 | 0.58028  |
| ZNF343   | 1.121293 | 0.673428 | 1.867013 | 0.659873 |
| EBF4     | 0.734146 | 0.58929  | 0.91461  | 0.005853 |
| CPXM1    | 1.163459 | 0.967472 | 1.39915  | 0.107703 |
| XRN2     | 0.863826 | 0.551475 | 1.353088 | 0.522618 |
| DYNLL1   | 1.096438 | 0.694293 | 1.731512 | 0.692905 |
| TESC     | 1.021959 | 0.877125 | 1.19071  | 0.780572 |
| SNX5     | 1.12431  | 0.673286 | 1.87747  | 0.654246 |
| RPL6     | 1.066739 | 0.73146  | 1.555699 | 0.737177 |
| SIRPG    | 1.007866 | 0.799993 | 1.269753 | 0.946993 |
| MAPKAPK  | 0.519108 | 0.281321 | 0.957885 | 0.035939 |
| P2RX7    | 1.170988 | 0.959027 | 1.429798 | 0.121303 |
| ESF1     | 0.95461  | 0.65457  | 1.39218  | 0.809327 |
| RBBP9    | 1.05886  | 0.633998 | 1.768434 | 0.826999 |
| ANAPC5   | 0.853458 | 0.534711 | 1.362213 | 0.506544 |
| SLC23A2  | 0.93078  | 0.634516 | 1.365374 | 0.713672 |
| KDM2B    | 0.810685 | 0.493434 | 1.331911 | 0.40738  |
| TASP1    | 0.556133 | 0.367647 | 0.841253 | 0.00546  |
| OAS1     | 1.335049 | 1.127436 | 1.580893 | 0.000806 |
| RPLP0    | 1.265192 | 0.863636 | 1.853455 | 0.227267 |
| PXN      | 1.412076 | 1.071963 | 1.860101 | 0.014119 |
| SIRT4    | 0.841162 | 0.555806 | 1.273025 | 0.413269 |
| KIF16B   | 1.397553 | 1.120779 | 1.742676 | 0.002953 |
| TRMT6    | 1.583353 | 1.039018 | 2.412863 | 0.032513 |
| PEBP1    | 1.411807 | 0.867678 | 2.297166 | 0.164982 |
| BRAP     | 1.083962 | 0.54036  | 2.174428 | 0.820431 |
| ERP29    | 1.080971 | 0.655305 | 1.783138 | 0.760448 |
| FUS      | 0.962185 | 0.576861 | 1.604893 | 0.882596 |
| IGBP1    | 0.935489 | 0.618195 | 1.415638 | 0.75238  |
| FXD5     | 0.956984 | 0.66826  | 1.370451 | 0.81035  |
| ZNF302   | 0.950768 | 0.678742 | 1.331818 | 0.769071 |
| GRAMD1A  | 0.843522 | 0.568608 | 1.251351 | 0.397737 |
| CMTM1    | 1.229212 | 0.934193 | 1.617398 | 0.140529 |
| KCNH4    | 1.220702 | 0.946473 | 1.574385 | 0.12449  |
| GANAB    | 0.856763 | 0.555093 | 1.322379 | 0.485108 |
| GMIP     | 1.330871 | 0.980498 | 1.806448 | 0.06671  |
| RBM41    | 0.978415 | 0.657097 | 1.456855 | 0.914445 |
| BIRC5    | 1.035808 | 0.773445 | 1.387168 | 0.813371 |
| LAG3     | 1.20205  | 1.013767 | 1.425302 | 0.034237 |
| MLF2     | 1.611441 | 1.024964 | 2.533496 | 0.038755 |
| OTUB2    | 1.122985 | 0.710446 | 1.775073 | 0.619522 |
| DDX24    | 1.282688 | 0.809954 | 2.031336 | 0.288523 |
| ZBTB25   | 0.778446 | 0.469184 | 1.291556 | 0.332272 |
| NECAP1   | 0.756229 | 0.429154 | 1.332578 | 0.333716 |
| ARHGAP4  | 1.482752 | 1.167261 | 1.883514 | 0.001251 |
| ANKRD24  | 1.432859 | 1.001053 | 2.050925 | 0.049331 |
| DHX32    | 0.769901 | 0.577287 | 1.026781 | 0.075067 |
| RCOR1    | 0.917656 | 0.560024 | 1.503675 | 0.733068 |
| LTBP4    | 1.008041 | 0.853284 | 1.190865 | 0.924969 |
| BLVRB    | 1.087156 | 0.908129 | 1.301478 | 0.362691 |
| SLC9A1   | 1.706134 | 1.096189 | 2.655466 | 0.01794  |
| SPTLC1   | 1.139083 | 0.651785 | 1.990701 | 0.647534 |

|           |          |          |          |          |
|-----------|----------|----------|----------|----------|
| PAPOLA    | 0.726033 | 0.430672 | 1.223955 | 0.229541 |
| CCNK      | 0.989126 | 0.561193 | 1.743377 | 0.969839 |
| PCBP4     | 0.908368 | 0.742009 | 1.112025 | 0.351769 |
| RGS1      | 0.963838 | 0.81438  | 1.140726 | 0.668338 |
| YPEL3     | 1.149056 | 0.827331 | 1.595891 | 0.407105 |
| MRPS33    | 1.106506 | 0.679195 | 1.802656 | 0.684423 |
| NDUFB2    | 0.915103 | 0.515563 | 1.624269 | 0.761848 |
| NUDC      | 2.439977 | 1.367179 | 4.354577 | 0.002543 |
| MAEA      | 1.251124 | 0.718227 | 2.17941  | 0.428838 |
| ICAM1     | 1.127096 | 0.913401 | 1.390786 | 0.264649 |
| STRN4     | 1.35535  | 0.882096 | 2.08251  | 0.165293 |
| IRAK3     | 0.928242 | 0.744413 | 1.157467 | 0.508428 |
| LYZ       | 1.052192 | 0.963427 | 1.149135 | 0.257888 |
| MUL1      | 2.454429 | 1.343122 | 4.485238 | 0.003512 |
| TFAP4     | 0.785949 | 0.48556  | 1.272173 | 0.326958 |
| PDCD7     | 1.019617 | 0.606735 | 1.713465 | 0.941526 |
| SPG21     | 1.799027 | 1.128211 | 2.8687   | 0.013638 |
| DNAJB11   | 0.571501 | 0.372656 | 0.876446 | 0.010334 |
| FLT3LG    | 1.194927 | 0.742759 | 1.92236  | 0.46289  |
| RAB11FIP3 | 0.880407 | 0.6591   | 1.176023 | 0.388524 |
| GNPTG     | 1.182896 | 0.76254  | 1.834976 | 0.453382 |
| ZNF268    | 0.905785 | 0.596648 | 1.375094 | 0.642244 |
| GOLGA3    | 0.746681 | 0.47778  | 1.166923 | 0.199731 |
| PABPC4    | 1.279561 | 0.733195 | 2.23307  | 0.385582 |
| CD209     | 1.050491 | 0.762714 | 1.446849 | 0.762975 |
| MCOLN1    | 1.563156 | 1.160444 | 2.105623 | 0.003293 |
| USP48     | 0.757319 | 0.497768 | 1.152207 | 0.1942   |
| EFNB1     | 1.027519 | 0.828554 | 1.274263 | 0.804733 |
| PDPR      | 0.953222 | 0.676792 | 1.342557 | 0.783957 |
| GLG1      | 1.304877 | 0.899591 | 1.892755 | 0.160814 |
| KIF4A     | 0.991647 | 0.765451 | 1.284684 | 0.949366 |
| TNRC6A    | 0.77347  | 0.45384  | 1.318208 | 0.34501  |
| PLEKHG2   | 1.078554 | 0.850401 | 1.367919 | 0.532876 |
| DLL3      | 0.519191 | 0.342349 | 0.787383 | 0.002036 |
| NAT14     | 0.890313 | 0.671541 | 1.180355 | 0.419379 |
| PITPNM2   | 0.89538  | 0.697249 | 1.149813 | 0.386496 |
| EXOC1     | 1.01941  | 0.654094 | 1.588758 | 0.93233  |
| RBM27     | 0.92617  | 0.602359 | 1.424052 | 0.72677  |
| OSBPL8    | 0.874933 | 0.602139 | 1.271313 | 0.483415 |
| DTX2      | 0.988898 | 0.657519 | 1.487286 | 0.957242 |
| NLRC4     | 1.077177 | 0.922214 | 1.258178 | 0.34818  |
| PUS7      | 0.803702 | 0.583352 | 1.107285 | 0.181346 |
| NRCAM     | 0.522299 | 0.203991 | 1.337292 | 0.17572  |
| LAMB1     | 0.607534 | 0.364945 | 1.011377 | 0.055307 |
| DLD       | 0.910995 | 0.60269  | 1.37701  | 0.658314 |
| WDR7      | 0.96296  | 0.606387 | 1.529208 | 0.872921 |
| TXNL1     | 0.710712 | 0.372582 | 1.355708 | 0.300027 |
| IL5RA     | 0.913344 | 0.751944 | 1.109387 | 0.360908 |
| ABCC6     | 0.88663  | 0.702686 | 1.118726 | 0.31045  |
| CMTM6     | 0.884151 | 0.608312 | 1.285069 | 0.518694 |
| ITGA6     | 0.912424 | 0.7484   | 1.112396 | 0.364688 |
| RAPGEF4   | 0.764031 | 0.505597 | 1.154562 | 0.201358 |
| FH        | 1.655195 | 1.056865 | 2.592263 | 0.027694 |
| SEL1L3    | 1.541608 | 1.245051 | 1.908803 | 7.17E-05 |
| CDV3      | 1.065687 | 0.647756 | 1.753265 | 0.802235 |
| MYO15A    | 1.183605 | 0.460169 | 3.04436  | 0.726556 |
| ALKBH5    | 2.1831   | 1.16284  | 4.098522 | 0.015124 |
| NLRP1     | 1.100505 | 0.916553 | 1.321375 | 0.304779 |

|          |          |          |          |          |
|----------|----------|----------|----------|----------|
| PITPNM3  | 1.042885 | 0.570184 | 1.907472 | 0.891578 |
| SPAG7    | 1.593315 | 0.89451  | 2.838037 | 0.113768 |
| ZC3HC1   | 1.016991 | 0.554644 | 1.864746 | 0.956564 |
| ESR1     | 1.158106 | 0.7876   | 1.702907 | 0.455551 |
| ANGPT2   | 1.12114  | 0.789566 | 1.591957 | 0.522693 |
| TMEM101  | 0.844908 | 0.493655 | 1.446089 | 0.538784 |
| CD200    | 0.958353 | 0.859845 | 1.068146 | 0.442073 |
| CCDC80   | 0.994391 | 0.696471 | 1.419748 | 0.975302 |
| CMA1     | 0.570644 | 0.336056 | 0.968989 | 0.037841 |
| PSME1    | 1.828311 | 1.177296 | 2.839319 | 0.007215 |
| PPP2R3C  | 0.957235 | 0.569814 | 1.608068 | 0.868838 |
| HAUS4    | 1.20146  | 0.810561 | 1.780874 | 0.360707 |
| JPH4     | 1.854355 | 1.418722 | 2.423753 | 6.19E-06 |
| CEBPE    | 0.887202 | 0.773856 | 1.017151 | 0.08614  |
| SLC7A8   | 0.925186 | 0.727456 | 1.176661 | 0.52617  |
| OSGEP    | 1.067219 | 0.6261   | 1.81913  | 0.811034 |
| SLC22A17 | 1.001111 | 0.797501 | 1.256704 | 0.992363 |
| RNF31    | 0.938097 | 0.484182 | 1.817554 | 0.849806 |
| SCFD1    | 0.519243 | 0.287305 | 0.938419 | 0.029973 |
| HECTD1   | 0.694201 | 0.429449 | 1.122172 | 0.136341 |
| HNRNPC   | 1.255501 | 0.607453 | 2.594904 | 0.539045 |
| RPGRIP1  | 0.925545 | 0.65651  | 1.30483  | 0.658816 |
| SUPT16H  | 1.135977 | 0.739262 | 1.745582 | 0.560792 |
| TOX4     | 1.694087 | 0.859001 | 3.341012 | 0.128176 |
| TGM1     | 1.289452 | 0.781953 | 2.126326 | 0.319173 |
| TINF2    | 2.372381 | 1.284639 | 4.381143 | 0.005775 |
| TBL1Y    | 0.622507 | 0.386786 | 1.001884 | 0.050913 |
| SEMA6A   | 0.990899 | 0.695296 | 1.412176 | 0.959658 |
| TRPM7    | 0.740701 | 0.46664  | 1.175721 | 0.202924 |
| TYRO3    | 0.8175   | 0.553757 | 1.206858 | 0.310628 |
| WDR76    | 1.099911 | 0.775883 | 1.55926  | 0.592768 |
| CAPN3    | 0.822186 | 0.608097 | 1.111649 | 0.203302 |
| SNAP23   | 0.720052 | 0.422977 | 1.225776 | 0.226288 |
| PHGDH    | 1.266403 | 1.049591 | 1.528001 | 0.013696 |
| COL9A3   | 1.024534 | 0.743432 | 1.411925 | 0.882244 |
| EZR      | 1.249815 | 0.930019 | 1.679575 | 0.139185 |
| MYL6     | 1.703849 | 1.106202 | 2.624387 | 0.015609 |
| TEKT2    | 0.72006  | 0.565733 | 0.916487 | 0.007618 |
| CLSPN    | 1.207644 | 0.889182 | 1.640165 | 0.227059 |
| RFFL     | 0.479037 | 0.277704 | 0.826334 | 0.008152 |
| UNC13D   | 1.416484 | 1.037345 | 1.934196 | 0.028477 |
| MFSD11   | 0.980392 | 0.555053 | 1.731669 | 0.945606 |
| DPYSL2   | 1.180492 | 1.01011  | 1.379614 | 0.036938 |
| GPATCH2  | 0.871251 | 0.478674 | 1.585796 | 0.651962 |
| NUP50    | 0.814999 | 0.494732 | 1.342593 | 0.421846 |
| COMT     | 0.828413 | 0.572671 | 1.198363 | 0.317638 |
| VNN3     | 1.136584 | 0.967747 | 1.334877 | 0.118668 |
| ECHDC1   | 0.981986 | 0.61771  | 1.561085 | 0.938737 |
| LRRFIP2  | 0.987378 | 0.60483  | 1.611883 | 0.959486 |
| SEC22C   | 1.656488 | 1.005411 | 2.729186 | 0.047575 |
| XYLB     | 1.291739 | 0.985401 | 1.69331  | 0.063813 |
| HDAC6    | 0.901975 | 0.615485 | 1.321817 | 0.596741 |
| CDC6     | 1.120645 | 0.818818 | 1.533729 | 0.47681  |
| UPRT     | 1.079741 | 0.557172 | 2.092423 | 0.820205 |
| CDC23    | 0.724883 | 0.475978 | 1.103949 | 0.13383  |
| AAAS     | 1.880548 | 1.088033 | 3.250326 | 0.023687 |
| CBX5     | 1.017813 | 0.726324 | 1.426281 | 0.918313 |
| MSH2     | 0.918281 | 0.650701 | 1.295894 | 0.627611 |

|          |          |          |          |          |
|----------|----------|----------|----------|----------|
| MAP3K1   | 0.639028 | 0.485323 | 0.841413 | 0.001423 |
| DHPS     | 0.863268 | 0.542323 | 1.374148 | 0.535317 |
| HOOK2    | 1.147536 | 0.712778 | 1.847475 | 0.571117 |
| ARCN1    | 1.303235 | 0.822185 | 2.065742 | 0.259784 |
| TMEM38B  | 1.681539 | 1.278218 | 2.212121 | 0.000204 |
| PSMD5    | 1.055111 | 0.626218 | 1.777749 | 0.840277 |
| PTGS1    | 1.267044 | 1.043294 | 1.538781 | 0.016964 |
| NUP188   | 1.091412 | 0.691394 | 1.722866 | 0.707256 |
| CRAT     | 1.234305 | 0.966751 | 1.575906 | 0.091276 |
| SH2D3C   | 1.296087 | 1.024965 | 1.638927 | 0.03032  |
| NANS     | 1.680349 | 0.823188 | 3.430045 | 0.154001 |
| TBC1D2   | 1.263114 | 1.004144 | 1.588872 | 0.046011 |
| PDE6C    | 0.903757 | 0.55456  | 1.472838 | 0.684662 |
| CWF19L1  | 1.381215 | 0.751512 | 2.538553 | 0.298324 |
| SEMA4G   | 0.821462 | 0.559389 | 1.206316 | 0.31577  |
| BTAF1    | 0.96418  | 0.66258  | 1.403067 | 0.848855 |
| IKZF5    | 0.839894 | 0.502821 | 1.402929 | 0.505053 |
| BLNK     | 1.178707 | 1.034324 | 1.343244 | 0.013657 |
| SORBS1   | 1.000238 | 0.756272 | 1.322907 | 0.998667 |
| BAMBI    | 0.866097 | 0.710084 | 1.056389 | 0.156007 |
| IL11     | 1.93598  | 0.637241 | 5.88164  | 0.243944 |
| WAC      | 1.077995 | 0.570733 | 2.036104 | 0.816952 |
| CREM     | 0.9044   | 0.490939 | 1.666071 | 0.747182 |
| NUBP2    | 1.258671 | 0.831643 | 1.904966 | 0.276568 |
| TPSD1    | 0.95104  | 0.857388 | 1.05492  | 0.342564 |
| HIVEP1   | 1.113535 | 0.766034 | 1.618673 | 0.57312  |
| TREM2    | 0.977842 | 0.82125  | 1.164291 | 0.801311 |
| KCNK16   | 0.903264 | 0.647784 | 1.259503 | 0.54864  |
| CRISP3   | 1.109733 | 0.924841 | 1.331587 | 0.262838 |
| FKBP5    | 1.427539 | 1.148217 | 1.774811 | 0.001355 |
| SRPK1    | 0.898406 | 0.575755 | 1.40187  | 0.636983 |
| BRPF3    | 0.831374 | 0.534816 | 1.292374 | 0.411946 |
| MRPS18A  | 2.722712 | 1.465804 | 5.057402 | 0.001523 |
| TMEM14A  | 1.318208 | 1.03954  | 1.671578 | 0.022609 |
| EFHC1    | 0.638277 | 0.420742 | 0.968282 | 0.034725 |
| NCR2     | 1.198832 | 1.040161 | 1.381706 | 0.012295 |
| HSP90AB1 | 1.179816 | 0.820677 | 1.696119 | 0.371928 |
| MLN      | 1.281777 | 0.766852 | 2.142464 | 0.343566 |
| CDC5L    | 1.058333 | 0.649405 | 1.724759 | 0.820019 |
| ITPR3    | 1.129774 | 0.952748 | 1.339693 | 0.160534 |
| ZNF184   | 0.790923 | 0.577298 | 1.083599 | 0.144248 |
| SIRT1    | 0.694406 | 0.413055 | 1.167397 | 0.168822 |
| HNRNPH3  | 0.583408 | 0.348489 | 0.976689 | 0.040396 |
| IFT74    | 0.712865 | 0.431752 | 1.177008 | 0.185854 |
| JAK2     | 1.03601  | 0.77669  | 1.381912 | 0.809804 |
| IL12RB1  | 1.730883 | 1.347771 | 2.222897 | 1.72E-05 |
| ABL1     | 0.893861 | 0.582074 | 1.372655 | 0.60817  |
| ACOT7    | 1.655416 | 1.222753 | 2.241174 | 0.00111  |
| SH3GLB1  | 1.013683 | 0.609717 | 1.685296 | 0.958212 |
| CDC7     | 0.939028 | 0.660848 | 1.334305 | 0.725612 |
| SYDE2    | 1.07578  | 0.731608 | 1.581863 | 0.710394 |
| PCSK5    | 1.096049 | 0.76726  | 1.565731 | 0.614251 |
| SCD      | 1.196441 | 1.029015 | 1.391107 | 0.019709 |
| TMED1    | 1.009895 | 0.628232 | 1.623427 | 0.967571 |
| ABLIM1   | 1.116539 | 0.953961 | 1.306823 | 0.169772 |
| ERMP1    | 1.062872 | 0.776897 | 1.454114 | 0.702979 |
| RAB18    | 0.841225 | 0.497361 | 1.42283  | 0.519058 |
| NRP1     | 0.933959 | 0.778878 | 1.119917 | 0.460827 |

|          |          |          |          |          |
|----------|----------|----------|----------|----------|
| HSD17B7P | 0.908882 | 0.701717 | 1.177205 | 0.46914  |
| PRTFDC1  | 1.091699 | 0.918185 | 1.298004 | 0.320489 |
| TSPAN15  | 1.326777 | 1.008624 | 1.745287 | 0.043244 |
| MAST3    | 1.281446 | 0.964228 | 1.703024 | 0.087462 |
| MZF1     | 0.805472 | 0.52539  | 1.234865 | 0.321058 |
| OCEL1    | 1.751209 | 1.206937 | 2.540923 | 0.003174 |
| MYO9B    | 1.210287 | 0.793601 | 1.845755 | 0.375421 |
| KCNK6    | 1.044201 | 0.840176 | 1.297772 | 0.696576 |
| PSMD8    | 2.084584 | 1.261332 | 3.445159 | 0.004161 |
| FBXL19   | 1.371131 | 0.933948 | 2.012963 | 0.107147 |
| STX1B    | 1.279011 | 0.914287 | 1.789229 | 0.150782 |
| HSD3B7   | 1.185231 | 0.943303 | 1.489205 | 0.144596 |
| SETD1A   | 1.220426 | 0.808871 | 1.841381 | 0.342515 |
| BCL7C    | 1.01255  | 0.599903 | 1.70904  | 0.962753 |
| CIRBP    | 1.616394 | 1.005957 | 2.597257 | 0.047199 |
| PRKY     | 0.986131 | 0.90302  | 1.07689  | 0.755871 |
| IGFALS   | 0.747346 | 0.509904 | 1.095353 | 0.135427 |
| HNRNPM   | 1.057317 | 0.618073 | 1.808717 | 0.838771 |
| NDUFB7   | 1.654452 | 1.115986 | 2.452729 | 0.012203 |
| TECR     | 1.604835 | 1.001011 | 2.572896 | 0.049512 |
| TIMM13   | 1.099844 | 0.781297 | 1.548268 | 0.585445 |
| CDC34    | 1.128556 | 0.740287 | 1.720464 | 0.574011 |
| MTAP     | 0.872843 | 0.553448 | 1.37656  | 0.558495 |
| POLR2E   | 1.954633 | 1.259536 | 3.033332 | 0.002798 |
| POLRMT   | 1.181195 | 0.848547 | 1.644247 | 0.323747 |
| HCN2     | 1.365862 | 0.958444 | 1.946467 | 0.084506 |
| RASSF7   | 1.415648 | 1.042671 | 1.922042 | 0.025895 |
| GADD45B  | 0.987369 | 0.801705 | 1.21603  | 0.904796 |
| PALM     | 0.795405 | 0.685626 | 0.92276  | 0.002521 |
| MADCAM   | 0.974893 | 0.535151 | 1.775978 | 0.933778 |
| MKNK2    | 1.396634 | 0.968153 | 2.014749 | 0.073962 |
| ARVCF    | 0.870724 | 0.70613  | 1.073683 | 0.195346 |
| TRMT2A   | 1.459574 | 0.945026 | 2.254283 | 0.088191 |
| RANBP1   | 1.558281 | 0.955322 | 2.541803 | 0.075589 |
| ZDHHC8   | 1.060479 | 0.800008 | 1.405756 | 0.683029 |
| KLHL22   | 1.084531 | 0.718767 | 1.636424 | 0.69903  |
| MED15    | 1.522725 | 1.014208 | 2.286209 | 0.04256  |
| SERPIND1 | 0.816714 | 0.56023  | 1.190623 | 0.292456 |
| SNAP29   | 1.823382 | 1.043329 | 3.186649 | 0.034955 |
| CRKL     | 1.228531 | 0.695676 | 2.169526 | 0.47811  |
| LZTR1    | 1.779132 | 1.056256 | 2.996729 | 0.030334 |
| MMP11    | 1.094119 | 0.813963 | 1.4707   | 0.551161 |
| CECR2    | 0.57917  | 0.308869 | 1.086017 | 0.088622 |
| SMARCB1  | 1.188166 | 0.696891 | 2.025765 | 0.5265   |
| DERL3    | 0.946587 | 0.698517 | 1.282757 | 0.723327 |
| BCL2L13  | 1.260548 | 0.680652 | 2.334502 | 0.461472 |
| DDTL     | 1.597812 | 0.89286  | 2.859355 | 0.114497 |
| OSM      | 1.126451 | 0.947468 | 1.339244 | 0.177422 |
| CABIN1   | 1.418216 | 0.956475 | 2.102863 | 0.082116 |
| TBC1D10A | 1.117227 | 0.76226  | 1.637495 | 0.569848 |
| SUSD2    | 1.010489 | 0.718421 | 1.421296 | 0.952195 |
| SF3A1    | 1.934816 | 1.057368 | 3.540406 | 0.032281 |
| GGT5     | 0.980729 | 0.836824 | 1.149381 | 0.810058 |
| RNF215   | 1.551727 | 0.937862 | 2.567388 | 0.087219 |
| SEC14L2  | 1.280445 | 0.911716 | 1.798302 | 0.153699 |
| SEC14L3  | 0.845574 | 0.594618 | 1.202445 | 0.350444 |
| PPIL2    | 1.265629 | 0.785137 | 2.040174 | 0.333546 |
| UPB1     | 1.292511 | 0.942526 | 1.772455 | 0.111255 |

|         |          |          |          |          |
|---------|----------|----------|----------|----------|
| YPEL1   | 0.708082 | 0.532861 | 0.940921 | 0.017323 |
| SNRPD3  | 1.412901 | 0.818101 | 2.440149 | 0.215045 |
| PES1    | 1.916742 | 1.103006 | 3.330807 | 0.021016 |
| MAPK1   | 1.429493 | 0.906604 | 2.25396  | 0.124061 |
| GGT1    | 1.363058 | 0.870569 | 2.134154 | 0.175729 |
| PRODH   | 0.897541 | 0.744611 | 1.081881 | 0.256714 |
| PPM1F   | 1.479492 | 1.123688 | 1.947957 | 0.005257 |
| SLC35E4 | 1.520865 | 1.150246 | 2.010901 | 0.003259 |
| TOP3B   | 0.523538 | 0.224806 | 1.219239 | 0.133516 |
| CYTH4   | 1.399781 | 1.165515 | 1.681135 | 0.000319 |
| MFNG    | 1.905779 | 1.388353 | 2.616046 | 6.60E-05 |
| CARD10  | 1.336432 | 0.868049 | 2.057545 | 0.187763 |
| LRP5L   | 0.812489 | 0.603027 | 1.094709 | 0.172223 |
| SLC25A1 | 1.432057 | 1.12309  | 1.826021 | 0.003778 |
| LGALS2  | 1.119239 | 1.023258 | 1.224222 | 0.013794 |
| GGA1    | 1.823286 | 1.135299 | 2.928192 | 0.012957 |
| HIRA    | 2.165761 | 1.03067  | 4.550942 | 0.04138  |
| SH3BP1  | 1.709634 | 1.212593 | 2.410412 | 0.002215 |
| SEZ6L   | 0.93444  | 0.773166 | 1.129354 | 0.482994 |
| LGALS1  | 1.297314 | 1.128732 | 1.491075 | 0.000247 |
| HPS4    | 0.818183 | 0.613447 | 1.091249 | 0.17204  |
| PIK3IP1 | 1.342227 | 1.058369 | 1.702217 | 0.015186 |
| SRRD    | 0.966677 | 0.613101 | 1.52416  | 0.884016 |
| PATZ1   | 1.040689 | 0.669011 | 1.618858 | 0.859573 |
| TRIOBP  | 1.343011 | 0.902382 | 1.998795 | 0.14604  |
| TFIP11  | 1.030703 | 0.654069 | 1.624215 | 0.896305 |
| GCAT    | 0.934338 | 0.753398 | 1.158733 | 0.536287 |
| CRYBB1  | 1.461527 | 1.082707 | 1.972888 | 0.013172 |
| ANKRD54 | 1.095929 | 0.707579 | 1.697422 | 0.681541 |
| EIF3L   | 0.986484 | 0.72538  | 1.341575 | 0.930871 |
| MICALL1 | 1.285285 | 0.94237  | 1.752982 | 0.112946 |
| POLR2F  | 1.359174 | 0.727423 | 2.539589 | 0.335971 |
| SOX10   | 0.79012  | 0.523234 | 1.193135 | 0.262614 |
| CCDC134 | 0.949058 | 0.615575 | 1.463203 | 0.812878 |
| DEPDC5  | 1.136508 | 0.655094 | 1.971701 | 0.648951 |
| PICK1   | 1.695292 | 1.19192  | 2.411247 | 0.003317 |
| TTC28   | 1.06617  | 0.880469 | 1.291038 | 0.511692 |
| SLC16A8 | 1.420675 | 1.136057 | 1.776598 | 0.002082 |
| CENPM   | 1.282676 | 0.957331 | 1.718589 | 0.09535  |
| SLC5A4  | 0.982842 | 0.825092 | 1.170753 | 0.84627  |
| KDELR3  | 0.836177 | 0.584383 | 1.196459 | 0.327705 |
| CYP2D6  | 0.964676 | 0.708667 | 1.313169 | 0.819219 |
| DDX17   | 0.724259 | 0.463851 | 1.130862 | 0.155892 |
| DMC1    | 0.860138 | 0.63335  | 1.168134 | 0.33465  |
| TCF20   | 0.959519 | 0.612489 | 1.503171 | 0.85682  |
| HSCB    | 1.366603 | 0.757031 | 2.467008 | 0.300037 |
| CBY1    | 0.964768 | 0.615313 | 1.512688 | 0.875791 |
| TOMM22  | 1.406822 | 0.77826  | 2.543042 | 0.258469 |
| XBP1    | 0.932119 | 0.641226 | 1.354977 | 0.712648 |
| JOSD1   | 1.521669 | 0.919156 | 2.519134 | 0.102636 |
| FBXO7   | 1.526598 | 0.902107 | 2.583397 | 0.114995 |
| GTPBP1  | 1.305699 | 0.820645 | 2.077453 | 0.260275 |
| POLDIP3 | 1.901208 | 1.001866 | 3.607861 | 0.049337 |
| RAB36   | 2.517543 | 1.437831 | 4.408045 | 0.001235 |
| TIMP3   | 1.067536 | 0.926507 | 1.230033 | 0.365977 |
| SBF1    | 1.183513 | 0.877623 | 1.596018 | 0.269441 |
| CYB5R3  | 1.638916 | 1.137788 | 2.360763 | 0.007973 |
| DNAL4   | 0.968036 | 0.587539 | 1.59495  | 0.898535 |

|          |          |          |          |          |
|----------|----------|----------|----------|----------|
| LMF2     | 1.252496 | 0.93759  | 1.673169 | 0.127559 |
| RHBDD3   | 1.151367 | 0.812202 | 1.632163 | 0.428555 |
| PACSIN2  | 1.647941 | 0.966283 | 2.810469 | 0.066649 |
| TTLL1    | 1.302686 | 0.849194 | 1.998353 | 0.225816 |
| RASL10A  | 0.884293 | 0.672542 | 1.162714 | 0.378595 |
| AP1B1    | 1.25596  | 0.933257 | 1.690247 | 0.132559 |
| HMGXB4   | 1.439303 | 0.794635 | 2.606975 | 0.229551 |
| TOM1     | 1.044333 | 0.800472 | 1.362485 | 0.749193 |
| NEFH     | 0.95225  | 0.763664 | 1.187407 | 0.663915 |
| CHKB     | 1.31266  | 0.762433 | 2.25997  | 0.326369 |
| BIK      | 0.924314 | 0.785206 | 1.088067 | 0.344281 |
| HMOX1    | 1.153015 | 1.02222  | 1.300546 | 0.020466 |
| MCAT     | 1.084687 | 0.716059 | 1.643084 | 0.701229 |
| THOC5    | 0.921605 | 0.51067  | 1.66322  | 0.786375 |
| MCM5     | 1.67416  | 1.184851 | 2.36554  | 0.003482 |
| APOBEC3F | 1.307322 | 1.050863 | 1.626369 | 0.016161 |
| ARSA     | 1.140828 | 0.900138 | 1.445877 | 0.275813 |
| TSPO     | 1.281582 | 1.006688 | 1.631541 | 0.044001 |
| RASD2    | 2.445276 | 0.744004 | 8.036752 | 0.140786 |
| TTLL12   | 1.338844 | 0.934506 | 1.918127 | 0.111674 |
| CBX7     | 1.051942 | 0.72852  | 1.518945 | 0.787043 |
| PDGFB    | 1.375746 | 1.025915 | 1.844868 | 0.0331   |
| ACR      | 0.831324 | 0.631319 | 1.094692 | 0.188296 |
| CABP7    | 0.668883 | 0.263534 | 1.697707 | 0.397428 |
| RPL3     | 1.150689 | 0.826965 | 1.601138 | 0.404987 |
| ZMAT5    | 1.627139 | 0.848986 | 3.118521 | 0.142451 |
| SYNGR1   | 0.865757 | 0.677282 | 1.10668  | 0.249828 |
| ASCC2    | 1.598465 | 0.898938 | 2.842342 | 0.110227 |
| MTMR3    | 0.758011 | 0.467542 | 1.228939 | 0.261104 |
| APOL4    | 1.05916  | 0.919786 | 1.219654 | 0.424619 |
| APOL1    | 1.510266 | 1.076917 | 2.117994 | 0.016874 |
| PNPLA3   | 1.36436  | 0.913783 | 2.037113 | 0.128734 |
| MYH9     | 1.550224 | 1.096332 | 2.192032 | 0.013127 |
| CACNA1I  | 1.16481  | 0.81161  | 1.671718 | 0.407894 |
| SAMM50   | 1.936629 | 1.011631 | 3.707411 | 0.046057 |
| TXN2     | 2.97384  | 1.643085 | 5.382389 | 0.000318 |
| FOXRED2  | 1.206712 | 0.876208 | 1.661881 | 0.249865 |
| GRAP2    | 0.919287 | 0.753534 | 1.1215   | 0.406764 |
| EIF3D    | 1.246068 | 0.807018 | 1.923978 | 0.320916 |
| TNRC6B   | 0.840248 | 0.578364 | 1.220713 | 0.361033 |
| SGSM3    | 0.991242 | 0.611325 | 1.607266 | 0.971546 |
| NCF4     | 1.510928 | 1.113873 | 2.049518 | 0.007972 |
| CSF2RB   | 1.136284 | 0.954819 | 1.352236 | 0.150102 |
| SLC25A17 | 0.973635 | 0.53208  | 1.78162  | 0.930936 |
| UPK3A    | 1.223589 | 1.015111 | 1.474883 | 0.034231 |
| FAM118A  | 1.11201  | 0.864414 | 1.430525 | 0.408711 |
| KCTD17   | 1.657669 | 1.277093 | 2.151657 | 0.000146 |
| ST13     | 0.779758 | 0.508911 | 1.194754 | 0.253183 |
| IL2RB    | 1.036162 | 0.870865 | 1.232834 | 0.688696 |
| RBX1     | 1.712188 | 0.819416 | 3.577656 | 0.152641 |
| EP300    | 0.98836  | 0.602481 | 1.621387 | 0.963023 |
| L3MBTL2  | 1.725167 | 0.932806 | 3.190588 | 0.082168 |
| CHADL    | 1.012571 | 0.662001 | 1.548788 | 0.954056 |
| RANGAP1  | 1.752248 | 1.086896 | 2.8249   | 0.021339 |
| ZC3H7B   | 1.147151 | 0.73433  | 1.792049 | 0.546386 |
| PHF5A    | 1.815445 | 0.986355 | 3.341432 | 0.055387 |
| ACO2     | 2.065766 | 1.176577 | 3.626951 | 0.011532 |
| POLR3H   | 1.482351 | 0.899702 | 2.442324 | 0.122322 |

|          |          |          |          |          |
|----------|----------|----------|----------|----------|
| TRMU     | 1.152487 | 0.709222 | 1.872795 | 0.566692 |
| PMM1     | 1.739321 | 1.267603 | 2.386583 | 0.000606 |
| CERK     | 0.974767 | 0.634879 | 1.496618 | 0.907001 |
| BRD1     | 0.84253  | 0.520497 | 1.363804 | 0.48562  |
| ZBED4    | 0.70851  | 0.483198 | 1.038882 | 0.077627 |
| MLC1     | 0.930112 | 0.783812 | 1.10372  | 0.406683 |
| HDAC10   | 1.088736 | 0.632097 | 1.875261 | 0.759255 |
| KCNK10   | 1.45354  | 1.097688 | 1.924754 | 0.00904  |
| ABHD4    | 0.796136 | 0.63932  | 0.991417 | 0.041651 |
| KHNYN    | 1.221394 | 0.795593 | 1.875083 | 0.360492 |
| FKBP3    | 1.283557 | 0.733627 | 2.245717 | 0.381758 |
| SDR39U1  | 1.120705 | 0.708782 | 1.772025 | 0.625907 |
| CTSG     | 0.978415 | 0.909054 | 1.053069 | 0.5608   |
| GZMH     | 1.2404   | 1.057048 | 1.455557 | 0.008296 |
| GZMB     | 1.257178 | 1.073068 | 1.472876 | 0.004613 |
| RBM23    | 1.058821 | 0.587498 | 1.908265 | 0.849167 |
| PRMT5    | 1.182742 | 0.751464 | 1.86154  | 0.468296 |
| COCH     | 0.910761 | 0.743859 | 1.115111 | 0.365441 |
| AP4S1    | 0.606209 | 0.360644 | 1.018982 | 0.058892 |
| POLE2    | 0.911698 | 0.649433 | 1.279877 | 0.593233 |
| SOS2     | 0.660256 | 0.413764 | 1.053591 | 0.08168  |
| CDKL1    | 1.118333 | 0.709955 | 1.761617 | 0.629521 |
| NIN      | 0.887878 | 0.643497 | 1.225067 | 0.469039 |
| PYGL     | 0.977721 | 0.721596 | 1.324757 | 0.884414 |
| TRIM9    | 1.158349 | 0.895745 | 1.497942 | 0.262449 |
| PSMC6    | 0.777515 | 0.475536 | 1.271258 | 0.315767 |
| GNPNAT1  | 0.912872 | 0.598661 | 1.391999 | 0.67194  |
| DDHD1    | 0.826722 | 0.5638   | 1.212256 | 0.329879 |
| CDKN3    | 1.032099 | 0.762506 | 1.39701  | 0.837925 |
| CGRRF1   | 0.997529 | 0.543039 | 1.8324   | 0.993638 |
| ATP6V1D  | 0.946808 | 0.550087 | 1.629645 | 0.843606 |
| PLEK2    | 0.976502 | 0.71475  | 1.334111 | 0.881275 |
| PIGH     | 1.228653 | 0.699656 | 2.157616 | 0.473526 |
| PSMA3    | 0.944174 | 0.506754 | 1.759165 | 0.856423 |
| VTI1B    | 1.068347 | 0.609513 | 1.872586 | 0.817398 |
| TIMM9    | 0.913673 | 0.580509 | 1.438046 | 0.696441 |
| GSTZ1    | 1.048371 | 0.660251 | 1.664643 | 0.841295 |
| KIAA0586 | 0.75092  | 0.470175 | 1.199301 | 0.230463 |
| TMED8    | 0.742435 | 0.475748 | 1.158615 | 0.189658 |
| AHSA1    | 1.497214 | 0.932413 | 2.404139 | 0.09485  |
| DAAM1    | 1.181051 | 0.876945 | 1.590616 | 0.273298 |
| SPTLC2   | 1.223873 | 0.897147 | 1.669586 | 0.202316 |
| RIN3     | 1.514475 | 1.093844 | 2.096856 | 0.012409 |
| LGMIN    | 1.091117 | 0.893159 | 1.332951 | 0.393247 |
| ALKBH1   | 1.053694 | 0.564964 | 1.965206 | 0.869365 |
| SNW1     | 1.250868 | 0.683969 | 2.287635 | 0.467389 |
| CHGA     | 1.097952 | 0.757485 | 1.591449 | 0.621726 |
| ITPK1    | 1.818953 | 1.301401 | 2.542329 | 0.000462 |
| DHRS7    | 0.72223  | 0.499446 | 1.044389 | 0.083778 |
| PPM1A    | 0.639029 | 0.416287 | 0.980954 | 0.040569 |
| ASB2     | 1.824095 | 1.348307 | 2.467778 | 9.70E-05 |
| ERH      | 1.359878 | 0.841344 | 2.197993 | 0.209558 |
| HIF1A    | 0.848077 | 0.601691 | 1.195355 | 0.346714 |
| SLC10A1  | 0.944303 | 0.68687  | 1.298221 | 0.724182 |
| EIF5     | 0.836884 | 0.518    | 1.352074 | 0.466892 |
| SLC8A3   | 1.152751 | 0.959763 | 1.384546 | 0.128352 |
| DICER1   | 0.736408 | 0.503352 | 1.077371 | 0.115006 |
| ZFYVE21  | 0.872619 | 0.572053 | 1.331106 | 0.5271   |



|          |          |          |          |          |
|----------|----------|----------|----------|----------|
| MTHFD1   | 1.327608 | 0.892604 | 1.974608 | 0.161796 |
| TCL1A    | 0.97811  | 0.805763 | 1.18732  | 0.822909 |
| ZC3H14   | 0.69999  | 0.415135 | 1.180306 | 0.18087  |
| TELO2    | 1.240952 | 0.942912 | 1.633197 | 0.123439 |
| VRK1     | 1.147308 | 0.730442 | 1.802082 | 0.55084  |
| PSMC1    | 1.249621 | 0.681176 | 2.292434 | 0.471646 |
| PAPLN    | 0.8185   | 0.635564 | 1.05409  | 0.120707 |
| RPS6KA5  | 0.865189 | 0.546387 | 1.370003 | 0.536903 |
| PSMB5    | 1.634331 | 1.067714 | 2.501643 | 0.023721 |
| YY1      | 1.180699 | 0.619022 | 2.25202  | 0.614131 |
| ACIN1    | 0.731314 | 0.423597 | 1.262567 | 0.261382 |
| CCNB1IP1 | 1.229795 | 0.893618 | 1.69244  | 0.204227 |
| TRIP11   | 0.782792 | 0.519758 | 1.17894  | 0.241164 |
| APEX1    | 1.122298 | 0.75044  | 1.678418 | 0.574206 |
| PABPN1   | 0.836712 | 0.56258  | 1.244422 | 0.378722 |
| ARHGAP5  | 0.809668 | 0.69018  | 0.949843 | 0.009553 |
| CINP     | 2.208453 | 1.025157 | 4.757579 | 0.04303  |
| SRP54    | 0.827479 | 0.437264 | 1.565922 | 0.560636 |
| CHD8     | 1.055686 | 0.621122 | 1.794288 | 0.841292 |
| PCK2     | 1.206267 | 0.848678 | 1.714524 | 0.295859 |
| PSMA6    | 0.93373  | 0.57747  | 1.509778 | 0.779729 |
| NFKBIA   | 1.292151 | 0.997671 | 1.673551 | 0.052101 |
| PSME2    | 2.081149 | 1.400542 | 3.092502 | 0.000287 |
| BRMS1L   | 0.734766 | 0.507848 | 1.063076 | 0.101965 |
| REC8     | 1.323945 | 1.027364 | 1.706143 | 0.030114 |
| TM9SF1   | 0.924972 | 0.446226 | 1.917355 | 0.833899 |
| SEC23A   | 0.851708 | 0.518632 | 1.398691 | 0.525946 |
| GMPR2    | 1.24991  | 0.699608 | 2.23307  | 0.4512   |
| PNN      | 1.040439 | 0.647059 | 1.672973 | 0.870056 |
| RABGGTA  | 1.669563 | 1.123398 | 2.481257 | 0.011226 |
| NFATC4   | 1.368382 | 0.941338 | 1.989159 | 0.100337 |
| PLTP     | 0.969602 | 0.794119 | 1.183863 | 0.761856 |
| PCIF1    | 1.476915 | 0.932276 | 2.339733 | 0.096668 |
| GSS      | 1.794708 | 1.055382 | 3.051952 | 0.030854 |
| MMP9     | 0.931352 | 0.804963 | 1.077587 | 0.3392   |
| TRPC4AP  | 0.943476 | 0.560084 | 1.589308 | 0.826896 |
| PYGB     | 0.959473 | 0.680512 | 1.35279  | 0.813411 |
| ABHD12   | 1.35708  | 0.855688 | 2.152266 | 0.194415 |
| PROCR    | 0.805606 | 0.532286 | 1.219271 | 0.306625 |
| GINS1    | 1.048432 | 0.763101 | 1.440452 | 0.770429 |
| NINL     | 1.194506 | 0.745385 | 1.914239 | 0.460104 |
| CD40     | 1.200043 | 0.970188 | 1.484355 | 0.092768 |
| ZMYND8   | 0.909554 | 0.655938 | 1.261229 | 0.569756 |
| SGK2     | 0.799744 | 0.539696 | 1.185093 | 0.26543  |
| IFT52    | 0.73685  | 0.470791 | 1.153266 | 0.181527 |
| MYBL2    | 1.336639 | 1.038205 | 1.720858 | 0.024398 |
| NDRG3    | 0.619995 | 0.410152 | 0.937198 | 0.023351 |
| SLA2     | 1.018351 | 0.831985 | 1.246464 | 0.860031 |
| NFATC2   | 1.049198 | 0.834546 | 1.319061 | 0.6809   |
| PABPC1L  | 1.191118 | 0.887948 | 1.597797 | 0.243218 |
| STK4     | 1.31538  | 0.82342  | 2.101268 | 0.251378 |
| SALL4    | 0.8524   | 0.696344 | 1.04343  | 0.121646 |
| ADNP     | 0.837496 | 0.541678 | 1.294863 | 0.425064 |
| PFDN4    | 0.768971 | 0.502093 | 1.177701 | 0.227086 |
| DOK5     | 1.864779 | 1.120907 | 3.102311 | 0.016419 |
| CSTF1    | 1.18081  | 0.718369 | 1.940942 | 0.51217  |
| RAE1     | 1.616138 | 0.82936  | 3.149297 | 0.158455 |
| TPD52L2  | 1.465704 | 0.99385  | 2.161582 | 0.05375  |

|          |          |          |          |          |
|----------|----------|----------|----------|----------|
| DNAJC5   | 1.428135 | 0.989749 | 2.060692 | 0.056794 |
| CTSZ     | 1.259608 | 1.024762 | 1.548275 | 0.028358 |
| PRPF6    | 1.546433 | 0.958809 | 2.494195 | 0.073858 |
| TUBB1    | 1.117129 | 0.941415 | 1.325639 | 0.204605 |
| PSMA7    | 2.072017 | 1.289259 | 3.330018 | 0.002617 |
| SLCO4A1  | 1.414185 | 1.121477 | 1.783291 | 0.003402 |
| NTSR1    | 0.953462 | 0.808708 | 1.124128 | 0.570554 |
| TCFL5    | 0.77778  | 0.509435 | 1.187476 | 0.2444   |
| DIDO1    | 1.026563 | 0.651712 | 1.61702  | 0.909963 |
| SLC17A9  | 0.910317 | 0.734513 | 1.128199 | 0.390766 |
| BIRC7    | 0.849734 | 0.485043 | 1.488628 | 0.569218 |
| ARFGAP1  | 1.186487 | 0.81213  | 1.733405 | 0.376653 |
| AVP      | 1.005363 | 0.811238 | 1.245941 | 0.96103  |
| COL20A1  | 1.141237 | 0.782019 | 1.665461 | 0.493322 |
| EEF1A2   | 1.03105  | 0.847667 | 1.254105 | 0.759596 |
| PTK6     | 1.326773 | 1.038983 | 1.69428  | 0.02342  |
| GMEB2    | 1.140935 | 0.79593  | 1.635486 | 0.472979 |
| CDC25B   | 1.485388 | 1.057966 | 2.085489 | 0.022287 |
| ISM1     | 0.611901 | 0.311229 | 1.203044 | 0.154436 |
| RNF24    | 0.880327 | 0.581713 | 1.332232 | 0.546531 |
| ARFRP1   | 1.549759 | 0.898546 | 2.672933 | 0.115188 |
| TRIB3    | 1.142511 | 0.908532 | 1.436747 | 0.254491 |
| RASSF2   | 1.177143 | 0.890644 | 1.555802 | 0.25175  |
| CSNK2A1  | 0.874972 | 0.454068 | 1.686039 | 0.689829 |
| CDS2     | 1.15841  | 0.719593 | 1.864822 | 0.544958 |
| HM13     | 2.27177  | 1.180976 | 4.370059 | 0.013959 |
| SNPH     | 1.478523 | 1.090873 | 2.003929 | 0.011715 |
| MYLK2    | 0.933599 | 0.630668 | 1.382038 | 0.731372 |
| SIRPB1   | 1.077857 | 0.961533 | 1.208254 | 0.198184 |
| SEC23B   | 1.672136 | 1.1172   | 2.502721 | 0.012469 |
| FERMT1   | 1.088375 | 0.916852 | 1.291987 | 0.33312  |
| PLCB4    | 0.984003 | 0.833605 | 1.161537 | 0.848879 |
| MYL9     | 1.087279 | 0.875327 | 1.350555 | 0.449432 |
| HCK      | 1.278427 | 1.097273 | 1.489489 | 0.001629 |
| TM9SF4   | 1.524367 | 0.847768 | 2.740956 | 0.159047 |
| CRNKL1   | 1.045991 | 0.635056 | 1.722838 | 0.859814 |
| POFUT1   | 1.262306 | 0.746062 | 2.13577  | 0.385305 |
| SAMHD1   | 1.173932 | 1.03418  | 1.332569 | 0.01315  |
| KIF3B    | 1.60112  | 0.950181 | 2.697996 | 0.077058 |
| NOP56    | 1.143525 | 0.754609 | 1.732884 | 0.52714  |
| MANBAL   | 1.788987 | 0.977054 | 3.275636 | 0.059464 |
| IDH3B    | 1.448401 | 0.894564 | 2.345125 | 0.131865 |
| MAPRE1   | 0.987197 | 0.611124 | 1.594698 | 0.958    |
| JAG1     | 0.972131 | 0.846979 | 1.115776 | 0.687704 |
| CDK5RAP1 | 1.080704 | 0.563817 | 2.071454 | 0.815141 |
| SNTA1    | 1.234676 | 0.868144 | 1.755959 | 0.240751 |
| OXT      | 1.072314 | 0.845027 | 1.360734 | 0.565647 |
| E2F1     | 0.991198 | 0.750097 | 1.309795 | 0.950426 |
| RPRD1B   | 1.040471 | 0.583056 | 1.856734 | 0.893194 |
| PXMP4    | 1.133776 | 0.591195 | 2.174323 | 0.705497 |
| CHMP4B   | 1.972265 | 1.285289 | 3.026425 | 0.001879 |
| BPI      | 0.994424 | 0.891845 | 1.108801 | 0.919813 |
| CST3     | 1.022619 | 0.899809 | 1.162189 | 0.731864 |
| ASIP     | 0.92922  | 0.656267 | 1.3157   | 0.679086 |
| ACTR5    | 0.919102 | 0.597895 | 1.41287  | 0.700588 |
| AHCY     | 1.416965 | 0.94534  | 2.123879 | 0.091458 |
| PPP1R16B | 1.104231 | 0.91703  | 1.329646 | 0.295513 |
| FAM83D   | 0.990978 | 0.768067 | 1.278582 | 0.944423 |

|          |          |          |          |          |
|----------|----------|----------|----------|----------|
| DHX35    | 1.183865 | 0.633504 | 2.212356 | 0.596759 |
| DNTTIP1  | 3.552182 | 1.901851 | 6.63459  | 6.99E-05 |
| MAP1LC3A | 1.137923 | 0.915446 | 1.414469 | 0.244406 |
| PIGU     | 1.188054 | 0.79381  | 1.778098 | 0.402268 |
| TNNC2    | 1.65693  | 1.135757 | 2.417258 | 0.008777 |
| ACOT8    | 1.347754 | 0.819214 | 2.217298 | 0.240029 |
| ZNF516   | 0.822368 | 0.667722 | 1.012831 | 0.065767 |
| ADNP2    | 1.079518 | 0.703945 | 1.655467 | 0.725783 |
| USP14    | 0.810484 | 0.494555 | 1.32823  | 0.404437 |
| VAPA     | 1.027699 | 0.617344 | 1.710823 | 0.916317 |
| METTL4   | 0.865253 | 0.49967  | 1.498315 | 0.60541  |
| LPIN2    | 0.801028 | 0.562438 | 1.140828 | 0.218812 |
| SMCHD1   | 0.67473  | 0.446295 | 1.020089 | 0.062091 |
| MYOM1    | 1.029358 | 0.718961 | 1.473763 | 0.874438 |
| MYL12A   | 1.680579 | 1.112889 | 2.53785  | 0.013565 |
| CEP76    | 0.541678 | 0.318791 | 0.9204   | 0.023413 |
| CEP192   | 0.636656 | 0.433601 | 0.934803 | 0.021224 |
| RNMT     | 0.653362 | 0.415923 | 1.02635  | 0.064734 |
| SMAD7    | 0.939153 | 0.711107 | 1.240396 | 0.658302 |
| RNF125   | 0.8272   | 0.636019 | 1.075847 | 0.15714  |
| ANKRD12  | 0.957344 | 0.635709 | 1.441711 | 0.834697 |
| POLI     | 0.749923 | 0.47983  | 1.172048 | 0.206532 |
| MIB1     | 0.527843 | 0.390625 | 0.713262 | 3.18E-05 |
| RBBP8    | 1.182383 | 0.833024 | 1.678257 | 0.348471 |
| RIOK3    | 1.113453 | 0.723154 | 1.714404 | 0.625535 |
| CSTF2    | 1.866017 | 1.049439 | 3.31798  | 0.033646 |
| VSIG1    | 0.957471 | 0.630671 | 1.453612 | 0.83834  |
| PSMD10   | 1.08215  | 0.65548  | 1.786549 | 0.757586 |
| ATG4A    | 1.473421 | 0.890748 | 2.437245 | 0.131194 |
| STS      | 1.173087 | 0.9566   | 1.438566 | 0.125105 |
| TBL1X    | 0.990816 | 0.79446  | 1.235702 | 0.934745 |
| GPR143   | 0.674714 | 0.389965 | 1.167385 | 0.159526 |
| PGRMC1   | 1.709611 | 1.121497 | 2.606131 | 0.012666 |
| POLA1    | 1.007112 | 0.642807 | 1.577883 | 0.975321 |
| MID1     | 1.14097  | 0.436353 | 2.983394 | 0.787994 |
| NKAP     | 0.912422 | 0.499279 | 1.667432 | 0.765752 |
| RHOXF1   | 0.932708 | 0.678255 | 1.282622 | 0.668219 |
| NXT2     | 1.147469 | 0.856736 | 1.536862 | 0.356144 |
| ALG13    | 0.795369 | 0.49806  | 1.270152 | 0.337733 |
| PRPS2    | 0.987934 | 0.626645 | 1.557521 | 0.958317 |
| TLR8     | 1.100852 | 1.005665 | 1.205049 | 0.037306 |
| MOSPD1   | 0.923155 | 0.632717 | 1.346913 | 0.678259 |
| AMMECR1  | 1.119725 | 0.837698 | 1.496702 | 0.44499  |
| CHRD1    | 1.112181 | 0.977369 | 1.265587 | 0.1068   |
| WDR13    | 1.207727 | 0.826695 | 1.764381 | 0.329115 |
| SUV39H1  | 1.305619 | 0.848391 | 2.009261 | 0.225339 |
| SRPX     | 0.994554 | 0.749251 | 1.320168 | 0.969853 |
| XIAP     | 0.867783 | 0.567554 | 1.326832 | 0.512724 |
| STAG2    | 0.85195  | 0.644024 | 1.127006 | 0.26169  |
| ATP11C   | 1.027823 | 0.750171 | 1.408239 | 0.864375 |
| MCF2     | 1.003484 | 0.647884 | 1.55426  | 0.98757  |
| ABCD1    | 1.576909 | 1.181212 | 2.105161 | 0.002003 |
| CCDC22   | 1.743328 | 1.119801 | 2.714049 | 0.013856 |
| CACNA1F  | 1.433443 | 1.032107 | 1.990839 | 0.031672 |
| SYP      | 1.792581 | 1.053514 | 3.050122 | 0.031382 |
| PLP2     | 1.126922 | 0.890691 | 1.425808 | 0.319479 |
| BMX      | 0.818381 | 0.669827 | 0.999883 | 0.049866 |
| PLS3     | 0.957111 | 0.764085 | 1.1989   | 0.702874 |

|          |          |          |          |          |
|----------|----------|----------|----------|----------|
| RENBP    | 1.541343 | 1.183667 | 2.0071   | 0.00132  |
| ELF4     | 1.397383 | 1.02205  | 1.910552 | 0.036027 |
| SMARCA1  | 0.915703 | 0.741911 | 1.130205 | 0.412157 |
| MTMR8    | 0.952465 | 0.70493  | 1.286923 | 0.751117 |
| ASB9     | 1.041143 | 0.866512 | 1.250967 | 0.666893 |
| ZC3H12B  | 0.838117 | 0.60886  | 1.153697 | 0.278764 |
| RBBP7    | 1.494927 | 0.885671 | 2.523293 | 0.132222 |
| KCND1    | 1.014069 | 0.699561 | 1.469975 | 0.941205 |
| SLC25A14 | 0.841462 | 0.473041 | 1.496823 | 0.556936 |
| FMR1     | 1.001684 | 0.623214 | 1.609996 | 0.994454 |
| PIM2     | 1.133335 | 0.833806 | 1.540463 | 0.42412  |
| SCML2    | 0.993587 | 0.810379 | 1.218214 | 0.95067  |
| SLC35A2  | 1.009497 | 0.652821 | 1.561045 | 0.966102 |
| PQBP1    | 1.871571 | 1.102092 | 3.1783   | 0.020355 |
| PCSK1N   | 1.523198 | 1.079582 | 2.149102 | 0.016577 |
| EMD      | 1.737258 | 1.14776  | 2.629527 | 0.009012 |
| TAZ      | 1.4153   | 0.940335 | 2.13017  | 0.095901 |
| PGK1     | 1.499632 | 0.9536   | 2.358323 | 0.079383 |
| GATA1    | 1.011932 | 0.882831 | 1.159911 | 0.86475  |
| MAGT1    | 0.88187  | 0.537709 | 1.446313 | 0.618466 |
| SMS      | 0.835485 | 0.506094 | 1.379259 | 0.4822   |
| PHEX     | 1.413384 | 1.030666 | 1.938216 | 0.031758 |
| UBL4A    | 1.831952 | 1.18328  | 2.836224 | 0.006636 |
| CD99L2   | 1.0796   | 0.729447 | 1.597833 | 0.701804 |
| EEA1     | 0.949779 | 0.655314 | 1.376561 | 0.785526 |
| RP2      | 1.147885 | 0.826032 | 1.595145 | 0.411341 |
| USP11    | 1.117484 | 0.797601 | 1.565659 | 0.518542 |
| PCYT1B   | 0.911717 | 0.71274  | 1.166243 | 0.461885 |
| HTATSF1  | 1.513882 | 0.93099  | 2.461723 | 0.094584 |
| CD40LG   | 0.995951 | 0.780227 | 1.271321 | 0.974014 |
| TIMP1    | 1.033818 | 0.870111 | 1.228326 | 0.705338 |
| GABRE    | 0.822772 | 0.71561  | 0.945983 | 0.006145 |
| FGD1     | 0.943678 | 0.550379 | 1.618027 | 0.833099 |
| PIN4     | 1.075701 | 0.544675 | 2.124444 | 0.833542 |
| PORCN    | 1.285213 | 0.898349 | 1.838677 | 0.169664 |
| MAGED2   | 0.997052 | 0.730996 | 1.359945 | 0.985129 |
| RBM3     | 1.16417  | 0.74218  | 1.826097 | 0.50809  |
| KLF8     | 1.012103 | 0.750684 | 1.364559 | 0.937103 |
| SYTL4    | 1.328083 | 1.139627 | 1.547704 | 0.000279 |
| ZDHHC15  | 1.126298 | 0.836596 | 1.516319 | 0.433064 |
| CENPI    | 0.820768 | 0.582528 | 1.156443 | 0.258862 |
| GLA      | 1.199208 | 0.799644 | 1.798426 | 0.379622 |
| ARMCX3   | 0.820463 | 0.568338 | 1.184437 | 0.2908   |
| BEX4     | 0.941203 | 0.768248 | 1.153095 | 0.558597 |
| NDFIP2   | 0.764205 | 0.613191 | 0.952408 | 0.016663 |
| TNFSF13B | 1.127432 | 0.906195 | 1.402682 | 0.28185  |
| FNDC3A   | 0.513312 | 0.348038 | 0.75707  | 0.000769 |
| MLNR     | 0.796839 | 0.624304 | 1.017057 | 0.068134 |
| CDADC1   | 0.72119  | 0.517829 | 1.004416 | 0.053126 |
| CAB39L   | 0.807995 | 0.501426 | 1.301999 | 0.381118 |
| KLF5     | 1.115373 | 0.910605 | 1.366187 | 0.29139  |
| STK24    | 1.187168 | 0.833918 | 1.690057 | 0.341047 |
| ACP5     | 1.013525 | 0.792151 | 1.296764 | 0.91491  |
| DNAJC3   | 0.87129  | 0.58995  | 1.286798 | 0.488602 |
| ARHGEF7  | 0.953825 | 0.628169 | 1.448308 | 0.824436 |
| FGF9     | 0.859809 | 0.300143 | 2.463065 | 0.778489 |
| PARP4    | 0.848186 | 0.58666  | 1.226297 | 0.381359 |
| MRPS31   | 0.913642 | 0.529167 | 1.577463 | 0.745842 |

|          |          |          |          |          |
|----------|----------|----------|----------|----------|
| SLC25A15 | 1.064058 | 0.714791 | 1.583987 | 0.7597   |
| KPNA3    | 0.911651 | 0.566154 | 1.46799  | 0.703536 |
| FLT1     | 0.806777 | 0.500543 | 1.300367 | 0.378011 |
| DGKH     | 1.074879 | 0.846791 | 1.364403 | 0.552931 |
| KATNAL1  | 0.82448  | 0.576174 | 1.179796 | 0.291138 |
| INTS6    | 0.969018 | 0.54053  | 1.737177 | 0.915843 |
| DHRS12   | 1.261511 | 0.892529 | 1.783033 | 0.188198 |
| TSC22D1  | 0.99705  | 0.771692 | 1.28822  | 0.981969 |
| CLN5     | 0.648662 | 0.336091 | 1.251929 | 0.196974 |
| OLFM4    | 0.980876 | 0.825804 | 1.165068 | 0.825935 |
| MSLN     | 0.9101   | 0.804108 | 1.030064 | 0.135936 |
| MGRN1    | 1.192821 | 0.816488 | 1.742614 | 0.36194  |
| ZNF629   | 0.890592 | 0.599778 | 1.322412 | 0.565657 |
| TRADD    | 1.75874  | 1.133578 | 2.728676 | 0.011754 |
| HSF4     | 1.039971 | 0.765055 | 1.413676 | 0.802418 |
| CORO1A   | 1.447857 | 1.110615 | 1.887503 | 0.00623  |
| MAPK3    | 1.481726 | 0.99271  | 2.211635 | 0.054335 |
| GDPD3    | 0.926811 | 0.653516 | 1.314395 | 0.669833 |
| ELMO3    | 1.098814 | 0.743796 | 1.623286 | 0.636001 |
| PHKB     | 0.848907 | 0.521608 | 1.381581 | 0.509767 |
| LYRM1    | 1.174784 | 0.798954 | 1.727407 | 0.412838 |
| NUTF2    | 1.324223 | 0.781787 | 2.243025 | 0.296291 |
| NUP93    | 1.878928 | 1.030383 | 3.426271 | 0.039628 |
| CENPT    | 1.102511 | 0.754095 | 1.611908 | 0.614556 |
| TSNAXIP1 | 0.824515 | 0.474055 | 1.434063 | 0.494409 |
| NFAT5    | 0.56004  | 0.401526 | 0.781132 | 0.000638 |
| LONP2    | 0.822324 | 0.503652 | 1.342627 | 0.434173 |
| N4BP1    | 1.389437 | 0.781984 | 2.468766 | 0.262097 |
| ARL2BP   | 2.185422 | 1.172097 | 4.074809 | 0.013912 |
| PLLP     | 1.867407 | 0.807019 | 4.321096 | 0.144547 |
| CCL22    | 2.539634 | 1.652695 | 3.90256  | 2.12E-05 |
| DHODH    | 0.678119 | 0.420599 | 1.093308 | 0.110957 |
| CCL17    | 1.066134 | 0.456644 | 2.489119 | 0.882319 |
| CTCF     | 0.899512 | 0.507621 | 1.593951 | 0.716753 |
| ACD      | 1.304617 | 0.875583 | 1.943877 | 0.191234 |
| POLR2C   | 2.148445 | 1.098966 | 4.200144 | 0.02536  |
| PARD6A   | 1.358135 | 0.916423 | 2.012748 | 0.127227 |
| ZNF821   | 1.264042 | 0.725884 | 2.20118  | 0.407699 |
| MMP15    | 0.951564 | 0.814327 | 1.111931 | 0.532111 |
| CYB5B    | 0.754471 | 0.399594 | 1.424512 | 0.384944 |
| NME3     | 1.2875   | 0.985512 | 1.682025 | 0.063889 |
| NDRG4    | 0.816217 | 0.448282 | 1.48614  | 0.506569 |
| PSMD7    | 1.395841 | 0.832573 | 2.340181 | 0.205888 |
| SETD6    | 0.679809 | 0.393589 | 1.174169 | 0.166317 |
| SLC38A7  | 1.187484 | 0.742547 | 1.89903  | 0.473166 |
| VAC14    | 1.286671 | 0.801407 | 2.065771 | 0.296731 |
| HAS3     | 0.578513 | 0.377456 | 0.886666 | 0.012002 |
| COG4     | 1.513544 | 0.971991 | 2.356828 | 0.066619 |
| SMPD3    | 1.371591 | 1.015452 | 1.852636 | 0.039405 |
| SLC7A6OS | 0.991468 | 0.55825  | 1.760873 | 0.976673 |
| SLC7A6   | 1.336747 | 0.85857  | 2.081245 | 0.198828 |
| PLA2G15  | 1.409858 | 0.999781 | 1.988135 | 0.050146 |
| ESRP2    | 0.764333 | 0.545501 | 1.070952 | 0.118371 |
| WDR59    | 0.776837 | 0.52739  | 1.144267 | 0.201264 |
| MON1B    | 1.416529 | 0.834529 | 2.404414 | 0.197088 |
| AXIN1    | 1.131456 | 0.787546 | 1.625545 | 0.504092 |
| HCFC1R1  | 1.465708 | 1.01105  | 2.124822 | 0.043595 |
| MLYCD    | 0.510867 | 0.340678 | 0.766076 | 0.001158 |

|          |          |          |          |          |
|----------|----------|----------|----------|----------|
| MPG      | 1.358855 | 0.986865 | 1.871063 | 0.060251 |
| HSDL1    | 0.603311 | 0.443838 | 0.820084 | 0.001254 |
| TAF1C    | 0.979841 | 0.692786 | 1.385839 | 0.908339 |
| NAGPA    | 1.243093 | 0.847339 | 1.823687 | 0.265789 |
| WFDC1    | 0.811825 | 0.608635 | 1.08285  | 0.156074 |
| COTL1    | 1.32591  | 1.100556 | 1.597409 | 0.002997 |
| USP10    | 1.21296  | 0.719877 | 2.043781 | 0.46829  |
| CRISPLD2 | 1.085944 | 0.935056 | 1.26118  | 0.280048 |
| TSC2     | 1.121676 | 0.746176 | 1.68614  | 0.580871 |
| ZNF500   | 1.085182 | 0.67871  | 1.735087 | 0.732801 |
| NME4     | 1.107188 | 0.812471 | 1.508811 | 0.519043 |
| ABCC1    | 1.101611 | 0.80679  | 1.504168 | 0.542545 |
| NOMO3    | 0.795899 | 0.498498 | 1.270727 | 0.33892  |
| LMF1     | 0.884458 | 0.618837 | 1.264089 | 0.500421 |
| FOXF1    | 0.477758 | 0.142914 | 1.597137 | 0.230303 |
| MTHFSD   | 0.909876 | 0.533843 | 1.550784 | 0.728465 |
| CLCN7    | 1.151975 | 0.854521 | 1.552971 | 0.353225 |
| HAGHL    | 0.922274 | 0.713404 | 1.192297 | 0.536866 |
| SLC7A5   | 0.936485 | 0.782118 | 1.121319 | 0.475208 |
| METRN    | 0.799519 | 0.601439 | 1.062836 | 0.123462 |
| FBXO31   | 0.887252 | 0.584395 | 1.347064 | 0.574446 |
| STUB1    | 1.50203  | 1.044936 | 2.159074 | 0.027993 |
| RHBDL1   | 0.98424  | 0.755151 | 1.282826 | 0.906452 |
| NUBP1    | 1.569686 | 0.895742 | 2.750694 | 0.115191 |
| UBE2I    | 1.150724 | 0.630561 | 2.099981 | 0.64736  |
| MEFV     | 1.13473  | 1.018323 | 1.264444 | 0.022094 |
| CRYM     | 1.384657 | 0.888644 | 2.157527 | 0.150366 |
| EEF2K    | 0.711999 | 0.458051 | 1.106736 | 0.131213 |
| GSPT1    | 1.037653 | 0.631981 | 1.703729 | 0.883845 |
| ZNF174   | 1.02924  | 0.591558 | 1.790752 | 0.91876  |
| CLUAP1   | 0.828809 | 0.556631 | 1.234076 | 0.355251 |
| UBFD1    | 0.705034 | 0.458898 | 1.083188 | 0.110658 |
| PRSS33   | 0.872407 | 0.350178 | 2.173452 | 0.769457 |
| EARS2    | 0.842317 | 0.539517 | 1.315063 | 0.450267 |
| GGA2     | 1.391015 | 0.949286 | 2.038293 | 0.090458 |
| AQP8     | 0.855779 | 0.425636 | 1.720622 | 0.662073 |
| CPPED1   | 1.164597 | 0.922481 | 1.470259 | 0.200051 |
| USP31    | 1.099971 | 0.76108  | 1.589761 | 0.612109 |
| HMOX2    | 1.812847 | 1.111213 | 2.957501 | 0.017207 |
| DNAJA3   | 1.792533 | 0.99019  | 3.245005 | 0.053929 |
| BFAR     | 1.102203 | 0.538577 | 2.255669 | 0.789988 |
| RRN3P2   | 1.209484 | 0.809155 | 1.807876 | 0.353722 |
| RBL2     | 0.774316 | 0.535641 | 1.11934  | 0.173718 |
| QPRT     | 0.907111 | 0.734293 | 1.120601 | 0.365964 |
| XYLT1    | 0.919368 | 0.729391 | 1.158825 | 0.476566 |
| PYCARD   | 1.720254 | 1.284803 | 2.30329  | 0.00027  |
| RPGRIP1L | 0.57132  | 0.374263 | 0.872132 | 0.009489 |
| MAZ      | 0.99355  | 0.734872 | 1.343286 | 0.966459 |
| STX4     | 1.759733 | 1.060883 | 2.918947 | 0.028607 |
| CDIPT    | 1.649698 | 1.0225   | 2.661618 | 0.040254 |
| BCKDK    | 2.477864 | 1.658086 | 3.70295  | 9.56E-06 |
| NOMO1    | 0.971495 | 0.633972 | 1.488712 | 0.894355 |
| IL21R    | 1.283448 | 0.963868 | 1.708988 | 0.087623 |
| SYT17    | 1.48604  | 1.116814 | 1.977334 | 0.006567 |
| TMC5     | 0.588029 | 0.209563 | 1.649995 | 0.313132 |
| RNF40    | 1.317968 | 0.842601 | 2.061521 | 0.226424 |
| AQP9     | 1.075307 | 0.968081 | 1.194408 | 0.175512 |
| AAGAB    | 1.718127 | 1.009464 | 2.924284 | 0.046078 |

|          |          |          |          |          |
|----------|----------|----------|----------|----------|
| IQCH     | 0.810448 | 0.472473 | 1.390186 | 0.445239 |
| LACTB    | 1.187742 | 0.838804 | 1.681836 | 0.332301 |
| CORO2B   | 0.714118 | 0.561241 | 0.908638 | 0.006154 |
| CSK      | 2.027055 | 1.401233 | 2.932383 | 0.000176 |
| HERC1    | 1.095878 | 0.767701 | 1.564344 | 0.61413  |
| TRIP4    | 1.239976 | 0.632197 | 2.432059 | 0.531442 |
| MTFMT    | 1.665561 | 0.942123 | 2.944515 | 0.07928  |
| ACSBG1   | 1.125913 | 0.853931 | 1.484522 | 0.400541 |
| IGDCC4   | 0.458391 | 0.266561 | 0.788268 | 0.0048   |
| RAB11A   | 1.249708 | 0.725971 | 2.151283 | 0.421186 |
| CTSH     | 1.146221 | 0.920588 | 1.427156 | 0.222401 |
| TTC23    | 0.80212  | 0.636674 | 1.010558 | 0.061365 |
| CD276    | 1.20817  | 1.027959 | 1.419974 | 0.021759 |
| FAH      | 1.136352 | 0.799457 | 1.615216 | 0.476189 |
| RPAP1    | 1.000971 | 0.642292 | 1.559948 | 0.99658  |
| HOMER2   | 0.919596 | 0.729336 | 1.159487 | 0.478483 |
| EHD4     | 1.293864 | 1.03277  | 1.620966 | 0.025068 |
| TMEM87A  | 0.558392 | 0.387618 | 0.804403 | 0.001756 |
| CEP152   | 0.962985 | 0.643743 | 1.440543 | 0.854361 |
| ATP8B4   | 0.867999 | 0.715634 | 1.052805 | 0.150588 |
| DTWD1    | 0.889559 | 0.559628 | 1.414001 | 0.620655 |
| TGM5     | 0.872763 | 0.714712 | 1.065766 | 0.181841 |
| FAM189A1 | 0.848915 | 0.358901 | 2.007958 | 0.709224 |
| GABPB1   | 0.984982 | 0.64079  | 1.514051 | 0.945001 |
| BMF      | 1.36286  | 1.031424 | 1.800799 | 0.029436 |
| DMXL2    | 0.92891  | 0.800805 | 1.077509 | 0.330066 |
| SCG3     | 1.130452 | 0.485946 | 2.62976  | 0.775909 |
| DNAJC17  | 1.906978 | 1.003219 | 3.624898 | 0.048865 |
| EIF3J    | 1.024483 | 0.604195 | 1.737133 | 0.928461 |
| SPG11    | 0.799136 | 0.515529 | 1.238764 | 0.316062 |
| RHOV     | 1.091709 | 0.519219 | 2.295424 | 0.816999 |
| VPS18    | 1.285753 | 0.850059 | 1.94476  | 0.233846 |
| OIP5     | 0.754809 | 0.473761 | 1.202582 | 0.236534 |
| SLC30A4  | 0.816463 | 0.537708 | 1.23973  | 0.341328 |
| MYEF2    | 1.124877 | 0.953017 | 1.327728 | 0.1642   |
| SGK3     | 1.034102 | 0.688024 | 1.554258 | 0.871857 |
| CSPP1    | 0.465801 | 0.287569 | 0.754498 | 0.001904 |
| ZDHHC2   | 1.025188 | 0.77736  | 1.352025 | 0.860148 |
| BRF2     | 1.251057 | 0.754272 | 2.07504  | 0.385601 |
| TRIM35   | 1.663455 | 0.955183 | 2.896914 | 0.072182 |
| ZFAND1   | 0.890857 | 0.611426 | 1.297994 | 0.547302 |
| CA2      | 0.991755 | 0.864587 | 1.137629 | 0.905872 |
| FZD3     | 0.942545 | 0.717799 | 1.237661 | 0.670286 |
| INTS9    | 1.492904 | 0.834683 | 2.670189 | 0.176753 |
| RIPK2    | 1.351345 | 0.90578  | 2.016088 | 0.140173 |
| NBN      | 0.953728 | 0.607583 | 1.497075 | 0.836837 |
| DECR1    | 1.295968 | 0.812306 | 2.067611 | 0.276697 |
| SFRP1    | 0.849735 | 0.517246 | 1.395949 | 0.520283 |
| LAPTM4B  | 1.026861 | 0.912411 | 1.155666 | 0.660207 |
| UBE2W    | 0.588615 | 0.376687 | 0.919778 | 0.019957 |
| POP1     | 1.143832 | 0.728759 | 1.795314 | 0.559036 |
| NIPAL2   | 0.952736 | 0.73959  | 1.227309 | 0.707862 |
| IKBKB    | 0.945887 | 0.618514 | 1.446537 | 0.79743  |
| PLAT     | 0.562645 | 0.291604 | 1.085614 | 0.086345 |
| DKK4     | 0.701943 | 0.371687 | 1.325642 | 0.275287 |
| STK3     | 0.526595 | 0.291127 | 0.952513 | 0.033934 |
| GDAP1    | 1.837193 | 1.094261 | 3.084527 | 0.021409 |
| RAB2A    | 1.227056 | 0.685563 | 2.19625  | 0.490873 |

|          |          |          |          |          |
|----------|----------|----------|----------|----------|
| EIF3E    | 0.809551 | 0.56593  | 1.158046 | 0.247415 |
| NDRG1    | 0.813164 | 0.618375 | 1.069312 | 0.138791 |
| IL7      | 1.242401 | 1.049852 | 1.470265 | 0.011531 |
| ARMC1    | 0.78268  | 0.494789 | 1.238078 | 0.294991 |
| TRPS1    | 1.137686 | 0.991857 | 1.304955 | 0.065308 |
| SPAG1    | 1.656166 | 1.217566 | 2.252761 | 0.001309 |
| CHRACT   | 2.126955 | 1.189226 | 3.804103 | 0.010953 |
| NCALD    | 1.324467 | 1.049438 | 1.671572 | 0.017967 |
| SNX16    | 0.702552 | 0.45079  | 1.094922 | 0.118901 |
| UBR5     | 0.779986 | 0.526584 | 1.155328 | 0.215107 |
| GSDMD    | 1.165861 | 0.816811 | 1.664072 | 0.397924 |
| EEF1D    | 0.903314 | 0.582832 | 1.400019 | 0.649221 |
| SQLE     | 1.28376  | 0.940642 | 1.752039 | 0.115418 |
| SH2D4A   | 1.131458 | 0.915799 | 1.397902 | 0.252322 |
| INTS10   | 1.094845 | 0.686302 | 1.746586 | 0.703757 |
| ERI1     | 1.286821 | 0.824144 | 2.009246 | 0.267334 |
| SLC39A14 | 1.13949  | 0.883809 | 1.469139 | 0.313821 |
| MTMR9    | 0.923422 | 0.534355 | 1.595771 | 0.775299 |
| LEPROTL1 | 0.822008 | 0.507442 | 1.331574 | 0.425792 |
| DCTN6    | 0.975384 | 0.524298 | 1.814567 | 0.937277 |
| R3HCC1   | 1.514708 | 0.8735   | 2.626605 | 0.139297 |
| GSR      | 1.188374 | 0.813708 | 1.735551 | 0.37179  |
| TNFRSF10 | 1.026183 | 0.761519 | 1.38283  | 0.865145 |
| UBXN8    | 0.893832 | 0.532213 | 1.501158 | 0.671358 |
| PPP2CB   | 0.960151 | 0.499937 | 1.844014 | 0.902799 |
| ERICH1   | 0.988136 | 0.679651 | 1.436639 | 0.950161 |
| TUSC3    | 1.304951 | 0.701711 | 2.426779 | 0.400422 |
| KLHDC4   | 0.906466 | 0.596325 | 1.377906 | 0.645791 |
| MCM4     | 1.211879 | 0.902867 | 1.626651 | 0.200689 |
| KCTD9    | 1.13137  | 0.66624  | 1.921225 | 0.647781 |
| ASAH1    | 0.928753 | 0.654773 | 1.317375 | 0.678557 |
| BNIP3L   | 0.98816  | 0.680769 | 1.43435  | 0.950047 |
| MAN2B1   | 1.127431 | 0.820052 | 1.550026 | 0.460219 |
| KCNN4    | 1.091995 | 0.800932 | 1.488831 | 0.577909 |
| TULP2    | 0.806597 | 0.619543 | 1.050126 | 0.110348 |
| NUCB1    | 1.200938 | 0.877575 | 1.643451 | 0.252614 |
| DHDH     | 1.142474 | 0.65208  | 2.001669 | 0.641554 |
| GYS1     | 1.208218 | 0.775448 | 1.882515 | 0.403171 |
| MAP4K1   | 2.250635 | 1.494665 | 3.388958 | 0.000103 |
| ECH1     | 1.811712 | 1.216274 | 2.698653 | 0.003467 |
| HNRNPL   | 0.973319 | 0.51938  | 1.824    | 0.932745 |
| NFKBIB   | 1.656665 | 1.109477 | 2.473724 | 0.013593 |
| LHB      | 1.075177 | 0.684477 | 1.688889 | 0.753067 |
| SARS2    | 1.163172 | 0.664909 | 2.034818 | 0.596304 |
| SNRNP70  | 0.985088 | 0.676976 | 1.433431 | 0.937425 |
| CLPTM1   | 1.392753 | 0.862037 | 2.250205 | 0.175913 |
| RELB     | 1.297242 | 0.995271 | 1.690834 | 0.054242 |
| LIN7B    | 0.740253 | 0.503595 | 1.088125 | 0.125952 |
| FCGRT    | 1.019277 | 0.86325  | 1.203505 | 0.821794 |
| PIH1D1   | 1.232193 | 0.759521 | 1.999023 | 0.397687 |
| CKM      | 1.118049 | 0.843196 | 1.482495 | 0.438249 |
| ARHGEF1E | 1.245546 | 0.822514 | 1.886148 | 0.299691 |
| PPP1R13L | 1.451995 | 1.065391 | 1.978888 | 0.018228 |
| PEX11G   | 0.909183 | 0.701564 | 1.178245 | 0.471628 |
| ERCC2    | 1.45537  | 0.953534 | 2.221316 | 0.081961 |
| DOT1L    | 1.117265 | 0.750293 | 1.663725 | 0.585197 |
| PLEKHJ1  | 1.832829 | 1.131022 | 2.970114 | 0.0139   |
| KLC3     | 1.1013   | 0.464456 | 2.611357 | 0.826615 |



|         |          |          |          |          |
|---------|----------|----------|----------|----------|
| CD37    | 2.112876 | 1.483271 | 3.00973  | 3.41E-05 |
| SF3A2   | 1.377879 | 0.976631 | 1.94398  | 0.067954 |
| AMH     | 0.955878 | 0.752132 | 1.214815 | 0.712164 |
| LYL1    | 1.145252 | 0.81219  | 1.614896 | 0.439211 |
| OAZ1    | 2.095643 | 1.372979 | 3.198677 | 0.000606 |
| TRMT1   | 1.293575 | 0.903891 | 1.851261 | 0.159291 |
| STX10   | 1.61658  | 1.082641 | 2.413848 | 0.018867 |
| RETN    | 0.917888 | 0.837646 | 1.005818 | 0.066406 |
| FCER2   | 1.085183 | 0.941605 | 1.250654 | 0.258901 |
| DMPK    | 1.09769  | 0.831451 | 1.449182 | 0.510774 |
| TBC1D17 | 1.077675 | 0.737549 | 1.574653 | 0.699039 |
| IL4I1   | 1.392832 | 1.147527 | 1.690576 | 0.000802 |
| CCDC130 | 1.241137 | 0.818037 | 1.88307  | 0.309789 |
| PTOV1   | 0.864401 | 0.603701 | 1.237679 | 0.426236 |
| SGTA    | 1.319945 | 0.829697 | 2.09987  | 0.241262 |
| KIR3DX1 | 1.249886 | 1.004187 | 1.555702 | 0.045784 |
| LILRB1  | 1.175856 | 1.035026 | 1.335848 | 0.012814 |
| MED25   | 0.968115 | 0.663359 | 1.412879 | 0.866578 |
| LILRA1  | 1.185246 | 1.055343 | 1.331138 | 0.004112 |
| SNAPC2  | 1.640285 | 1.132143 | 2.376497 | 0.008895 |
| TIMM44  | 1.142798 | 0.706264 | 1.849149 | 0.586702 |
| CCDC61  | 0.834315 | 0.49875  | 1.395654 | 0.490163 |
| IL27RA  | 1.620423 | 1.100351 | 2.386304 | 0.014517 |
| ASF1B   | 1.385576 | 1.024323 | 1.874235 | 0.034355 |
| TNNT1   | 1.124816 | 0.983381 | 1.286593 | 0.086249 |
| VRK3    | 2.190833 | 1.003814 | 4.781509 | 0.048893 |
| FAM32A  | 1.268038 | 0.710593 | 2.262787 | 0.42158  |
| MED26   | 1.458694 | 0.879485 | 2.419356 | 0.143604 |
| OLFM2   | 0.803525 | 0.560533 | 1.151852 | 0.233833 |
| RASAL3  | 1.226735 | 0.914855 | 1.644937 | 0.172131 |
| AKAP8   | 1.010848 | 0.606959 | 1.683499 | 0.96693  |
| ILVBL   | 1.351606 | 0.878237 | 2.080122 | 0.170779 |
| ZNF419  | 0.848053 | 0.549815 | 1.308064 | 0.456031 |
| SYDE1   | 0.744786 | 0.576369 | 0.962415 | 0.024268 |
| AURKC   | 0.636722 | 0.393537 | 1.030184 | 0.06594  |
| POP4    | 1.846424 | 0.894652 | 3.810734 | 0.097148 |
| CCNE1   | 1.096068 | 0.819962 | 1.465148 | 0.535607 |
| PDCD5   | 0.683063 | 0.393638 | 1.185289 | 0.175267 |
| ANKRD27 | 0.674274 | 0.511222 | 0.88933  | 0.005265 |
| RPS16   | 1.388388 | 0.868792 | 2.218736 | 0.170088 |
| TIMM50  | 1.509798 | 0.81463  | 2.798192 | 0.19064  |
| FBL     | 1.131927 | 0.752684 | 1.702253 | 0.551676 |
| DYRK1B  | 1.082186 | 0.781649 | 1.498276 | 0.634192 |
| CLC     | 1.033713 | 0.953994 | 1.120094 | 0.418077 |
| GPI     | 0.893496 | 0.653167 | 1.222254 | 0.48114  |
| AKT2    | 0.809948 | 0.525771 | 1.24772  | 0.339024 |
| PLD3    | 1.267746 | 1.018515 | 1.577964 | 0.033651 |
| PRX     | 1.082103 | 0.899114 | 1.302334 | 0.403814 |
| PIAS4   | 0.877423 | 0.508009 | 1.515467 | 0.639078 |
| NUMBL   | 0.901151 | 0.680892 | 1.19266  | 0.466695 |
| EBI3    | 1.390856 | 1.140503 | 1.696165 | 0.00112  |
| SHD     | 0.898893 | 0.796512 | 1.014433 | 0.084042 |
| TBCB    | 1.826842 | 1.161866 | 2.872407 | 0.009062 |
| FSD1    | 1.326928 | 0.860347 | 2.046545 | 0.200706 |
| POLR2I  | 1.404127 | 1.042244 | 1.891662 | 0.025611 |
| CLIP3   | 0.908027 | 0.764304 | 1.078777 | 0.272449 |
| SLC1A5  | 1.425935 | 0.985747 | 2.062689 | 0.059599 |
| PRKD2   | 1.282461 | 0.934605 | 1.759787 | 0.123309 |

|         |          |          |          |          |
|---------|----------|----------|----------|----------|
| TJP3    | 0.866984 | 0.536341 | 1.401462 | 0.560218 |
| APLP1   | 1.163252 | 0.80024  | 1.690937 | 0.428163 |
| CCDC9   | 0.958988 | 0.617353 | 1.489679 | 0.852167 |
| HNRNPUL | 1.969475 | 1.027011 | 3.776818 | 0.041331 |
| FZR1    | 1.030267 | 0.705819 | 1.503857 | 0.877197 |
| BBC3    | 1.298208 | 0.913267 | 1.845402 | 0.145842 |
| TGFB1   | 1.877843 | 1.380692 | 2.554006 | 5.92E-05 |
| DENND3  | 0.946159 | 0.710016 | 1.260841 | 0.705586 |
| CEACAM4 | 1.014402 | 0.865824 | 1.188476 | 0.85954  |
| MRPL4   | 1.69679  | 1.137328 | 2.531456 | 0.009586 |
| SIGLEC8 | 0.821006 | 0.580818 | 1.160521 | 0.264036 |
| CD79A   | 1.144605 | 0.945099 | 1.386225 | 0.166933 |
| RPS19   | 1.283166 | 0.854139 | 1.927689 | 0.229865 |
| NKG7    | 1.183628 | 0.974409 | 1.437771 | 0.089369 |
| ICAM5   | 0.992608 | 0.857955 | 1.148394 | 0.920542 |
| ETFB    | 2.613619 | 1.465488 | 4.661247 | 0.001135 |
| CD33    | 1.017106 | 0.834002 | 1.240411 | 0.866981 |
| TYK2    | 1.395399 | 0.981899 | 1.983035 | 0.063156 |
| CDC37   | 1.678634 | 1.136686 | 2.478972 | 0.009213 |
| NAPA    | 1.2717   | 0.87267  | 1.853188 | 0.210916 |
| RABAC1  | 1.369982 | 0.903911 | 2.076368 | 0.137865 |
| PTPRS   | 0.916834 | 0.784487 | 1.07151  | 0.274999 |
| CNFN    | 0.983699 | 0.741315 | 1.305335 | 0.909342 |
| MEGF8   | 0.965578 | 0.680367 | 1.370351 | 0.84453  |
| KDELR1  | 1.213068 | 0.68597  | 2.145186 | 0.506643 |
| CYTH2   | 0.657425 | 0.434973 | 0.993644 | 0.046567 |
| GRWD1   | 1.039448 | 0.673657 | 1.603863 | 0.861207 |
| GRIN2D  | 1.117314 | 0.830224 | 1.503678 | 0.46413  |
| CLEC11A | 0.830047 | 0.751232 | 0.917131 | 0.000253 |
| CCDC114 | 0.913296 | 0.608243 | 1.371345 | 0.66189  |
| CARD8   | 0.867646 | 0.552589 | 1.362329 | 0.537397 |
| LIG1    | 1.186602 | 0.815675 | 1.726209 | 0.370984 |
| SIGLEC6 | 1.036714 | 0.878483 | 1.223446 | 0.669593 |
| ZNF175  | 0.964558 | 0.698881 | 1.331231 | 0.826248 |
| PLA2G4C | 1.186461 | 0.920298 | 1.529601 | 0.187122 |
| SIGLEC5 | 1.059743 | 0.79858  | 1.406315 | 0.687721 |
| HAS1    | 1.391955 | 0.703937 | 2.752432 | 0.341747 |
| RAB3D   | 1.363105 | 1.046488 | 1.775514 | 0.021624 |
| DBP     | 0.902527 | 0.531993 | 1.53114  | 0.703733 |
| TMEM205 | 1.52846  | 1.087749 | 2.14773  | 0.014501 |
| CAPS    | 1.072918 | 0.765862 | 1.503081 | 0.682413 |
| FAM83E  | 1.43256  | 0.797746 | 2.572533 | 0.228801 |
| RASIP1  | 1.119741 | 0.75879  | 1.652396 | 0.568914 |
| BCAT2   | 1.175616 | 0.789831 | 1.749833 | 0.425281 |
| MIER2   | 1.085369 | 0.753424 | 1.563565 | 0.660057 |
| PLEKHA4 | 1.199182 | 0.894785 | 1.607132 | 0.224051 |
| PPP2R1A | 1.815609 | 1.0318   | 3.194841 | 0.03859  |
| TNPO2   | 1.053457 | 0.715922 | 1.55013  | 0.791588 |
| GCDH    | 0.765533 | 0.513778 | 1.140649 | 0.189124 |
| LILRB5  | 1.140228 | 0.858744 | 1.513977 | 0.364301 |
| KLF1    | 0.90066  | 0.776219 | 1.045051 | 0.167857 |
| DNASE2  | 0.922249 | 0.730867 | 1.163746 | 0.495194 |
| MAST1   | 0.689879 | 0.497267 | 0.957098 | 0.026251 |
| LENG1   | 1.872067 | 0.973176 | 3.601234 | 0.060312 |
| PRPF31  | 1.788427 | 1.032119 | 3.098936 | 0.038202 |
| TFPT    | 1.683999 | 1.001483 | 2.831654 | 0.04935  |
| JAK3    | 0.821483 | 0.64791  | 1.041557 | 0.104429 |
| RPL18A  | 1.452386 | 1.009951 | 2.08864  | 0.044074 |

|         |          |          |          |          |
|---------|----------|----------|----------|----------|
| SLC5A5  | 1.369042 | 1.075867 | 1.742107 | 0.010627 |
| KCNN1   | 1.132654 | 0.727655 | 1.763068 | 0.581127 |
| ARRDC2  | 1.727294 | 1.211934 | 2.461804 | 0.002501 |
| RAB3A   | 1.76626  | 1.22882  | 2.538756 | 0.002118 |
| ISYNA1  | 1.129189 | 0.897644 | 1.42046  | 0.299407 |
| ELL     | 1.348627 | 0.866239 | 2.099647 | 0.185436 |
| CRTC1   | 1.456088 | 0.978071 | 2.167729 | 0.064206 |
| COPE    | 1.323014 | 0.927822 | 1.886532 | 0.122067 |
| DDX49   | 1.101733 | 0.743462 | 1.632654 | 0.629247 |
| ETV2    | 0.868863 | 0.542089 | 1.392617 | 0.559209 |
| ARMC6   | 1.474691 | 0.99351  | 2.18892  | 0.053898 |
| TMEM147 | 1.265719 | 0.766878 | 2.089048 | 0.356671 |
| HAMP    | 0.803478 | 0.463357 | 1.39326  | 0.435928 |
| USF2    | 1.512693 | 0.984677 | 2.323848 | 0.058829 |
| LSR     | 1.276127 | 0.96425  | 1.688877 | 0.088129 |
| FKBP8   | 1.408398 | 1.034967 | 1.916567 | 0.02936  |
| ZNF14   | 0.682818 | 0.458577 | 1.016711 | 0.06033  |
| SCN1B   | 0.879831 | 0.635275 | 1.218533 | 0.441015 |
| PBX4    | 1.004413 | 0.753388 | 1.33908  | 0.976058 |
| ERF     | 1.221901 | 0.855381 | 1.745469 | 0.270705 |
| GSK3A   | 1.974713 | 0.982867 | 3.967463 | 0.055951 |
| ATP13A1 | 1.639884 | 1.053143 | 2.553519 | 0.028587 |
| ZNF574  | 1.009393 | 0.720089 | 1.414928 | 0.956732 |
| GRIK5   | 1.063592 | 0.909488 | 1.243807 | 0.440122 |
| SIPA1L3 | 0.721715 | 0.505168 | 1.031088 | 0.073171 |
| ZNF85   | 0.701113 | 0.522816 | 0.940216 | 0.017706 |
| ETHE1   | 1.04349  | 0.696624 | 1.56307  | 0.83641  |
| CADM4   | 1.068268 | 0.736615 | 1.549244 | 0.727695 |
| AVL9    | 0.524453 | 0.318292 | 0.864145 | 0.011308 |
| RUNDC3B | 0.633764 | 0.370998 | 1.082639 | 0.09505  |
| GTPBP10 | 0.557842 | 0.369506 | 0.842174 | 0.005482 |
| RASA4   | 0.777999 | 0.376387 | 1.60814  | 0.498026 |
| CDK6    | 0.713409 | 0.568216 | 0.895702 | 0.00363  |
| PMPCB   | 0.77748  | 0.497196 | 1.215768 | 0.269838 |
| DNAJC2  | 0.715395 | 0.471161 | 1.086233 | 0.116002 |
| TFPI2   | 10.53528 | 0.733911 | 151.2337 | 0.083209 |
| BET1    | 0.795908 | 0.509356 | 1.24367  | 0.316156 |
| NAMPT   | 1.063004 | 0.910112 | 1.241581 | 0.440608 |
| PIK3CG  | 1.125256 | 0.784389 | 1.61425  | 0.521551 |
| PON2    | 0.930207 | 0.802359 | 1.078427 | 0.337525 |
| ITGB8   | 0.824449 | 0.600052 | 1.132761 | 0.233687 |
| HBP1    | 0.571881 | 0.380162 | 0.860284 | 0.007311 |
| DUS4L   | 0.587352 | 0.324059 | 1.064566 | 0.079472 |
| SP4     | 0.757733 | 0.531486 | 1.080291 | 0.125237 |
| WDR91   | 1.428791 | 1.009273 | 2.022687 | 0.044219 |
| DNAH11  | 0.653409 | 0.416343 | 1.02546  | 0.064223 |
| CBLL1   | 0.708716 | 0.439229 | 1.143544 | 0.1584   |
| MTPN    | 1.120611 | 0.78004  | 1.609879 | 0.537855 |
| MPP6    | 1.064202 | 0.887233 | 1.276469 | 0.502492 |
| ZC3HAV1 | 0.707416 | 0.410123 | 1.220212 | 0.213341 |
| TTC26   | 0.591533 | 0.398984 | 0.877006 | 0.008971 |
| OGDH    | 1.334397 | 0.941627 | 1.890999 | 0.104841 |
| ADAP1   | 1.233126 | 0.982576 | 1.547565 | 0.070562 |
| TFEC    | 0.939844 | 0.745277 | 1.185205 | 0.600118 |
| CAV2    | 0.823798 | 0.648946 | 1.045762 | 0.111303 |
| CAV1    | 0.950351 | 0.805876 | 1.120727 | 0.545004 |
| MET     | 0.84498  | 0.404929 | 1.763248 | 0.653572 |
| RNF32   | 0.63228  | 0.371831 | 1.075161 | 0.090566 |

|          |          |          |          |          |
|----------|----------|----------|----------|----------|
| LMBR1    | 0.653577 | 0.407961 | 1.047067 | 0.076945 |
| HOXA1    | 1.293868 | 1.02533  | 1.632738 | 0.029952 |
| DNAJB6   | 0.622193 | 0.446987 | 0.866076 | 0.004923 |
| HOXA2    | 1.185867 | 1.011234 | 1.390657 | 0.035958 |
| HOXA3    | 1.190722 | 1.064439 | 1.331987 | 0.002276 |
| LFNG     | 1.261468 | 1.065838 | 1.493005 | 0.006901 |
| HOXA5    | 1.135112 | 1.04952  | 1.227685 | 0.001533 |
| HOXA6    | 1.154302 | 1.052605 | 1.265824 | 0.002292 |
| IQCE     | 1.443047 | 1.052242 | 1.978998 | 0.022847 |
| TSPAN12  | 0.983809 | 0.478773 | 2.021584 | 0.964568 |
| SSBP1    | 0.591176 | 0.348081 | 1.004045 | 0.051772 |
| HOXA13   | 1.020101 | 0.766418 | 1.357754 | 0.891487 |
| HIBADH   | 0.752084 | 0.485359 | 1.165385 | 0.2023   |
| TAX1BP1  | 0.744605 | 0.531426 | 1.0433   | 0.086594 |
| CPVL     | 1.124227 | 0.997009 | 1.267679 | 0.055996 |
| CHN2     | 0.904822 | 0.639417 | 1.280389 | 0.572324 |
| GRB10    | 0.986521 | 0.839487 | 1.159306 | 0.869094 |
| ABHD11   | 1.681288 | 1.242424 | 2.275174 | 0.000762 |
| FKBP14   | 0.927664 | 0.760354 | 1.131788 | 0.459327 |
| PLEKHA8  | 0.836217 | 0.668671 | 1.045744 | 0.116907 |
| STX1A    | 1.204843 | 0.821398 | 1.767288 | 0.340397 |
| NOD1     | 0.722043 | 0.506407 | 1.029502 | 0.071967 |
| CRHR2    | 1.276343 | 0.788263 | 2.066635 | 0.321033 |
| EPHB6    | 0.852131 | 0.638578 | 1.137101 | 0.276996 |
| CASP2    | 0.670707 | 0.453624 | 0.991676 | 0.0453   |
| CHCHD2   | 1.643315 | 0.976442 | 2.765637 | 0.061456 |
| CCL24    | 0.939906 | 0.754391 | 1.171041 | 0.58063  |
| HSPB1    | 1.221722 | 0.996958 | 1.49716  | 0.053533 |
| NPTX2    | 1.048143 | 0.928367 | 1.183371 | 0.447587 |
| PDAP1    | 1.385589 | 0.720309 | 2.665324 | 0.328539 |
| BUD31    | 0.982024 | 0.56572  | 1.704681 | 0.948602 |
| PTCD1    | 0.672685 | 0.398248 | 1.136239 | 0.138231 |
| CYP3A5   | 0.537245 | 0.343793 | 0.839552 | 0.006376 |
| ZKSCAN1  | 0.814878 | 0.572833 | 1.159196 | 0.254934 |
| EIF3B    | 1.025723 | 0.665263 | 1.581492 | 0.908467 |
| SNX8     | 1.940377 | 1.287673 | 2.923929 | 0.001532 |
| NUDT1    | 1.529298 | 1.060647 | 2.205024 | 0.022886 |
| TAF6     | 1.064495 | 0.647909 | 1.748936 | 0.805123 |
| WASL     | 0.675491 | 0.433473 | 1.052635 | 0.083038 |
| AIMP2    | 1.258959 | 0.720358 | 2.200265 | 0.418833 |
| TFR2     | 0.974475 | 0.825733 | 1.15001  | 0.759624 |
| FSCN3    | 1.040848 | 0.532382 | 2.034938 | 0.906826 |
| MOSPD3   | 1.271343 | 0.934617 | 1.729385 | 0.126204 |
| PCOLCE   | 0.909712 | 0.671713 | 1.232039 | 0.54087  |
| FBXO24   | 0.55434  | 0.291136 | 1.055494 | 0.07256  |
| RBM28    | 0.662495 | 0.44237  | 0.992155 | 0.045696 |
| USP42    | 0.584498 | 0.325272 | 1.050313 | 0.072525 |
| IMPDH1   | 1.186877 | 0.881581 | 1.597898 | 0.258801 |
| AGFG2    | 0.909313 | 0.605123 | 1.366414 | 0.6473   |
| LSM5     | 0.941074 | 0.574444 | 1.5417   | 0.809441 |
| SERPINE1 | 0.844446 | 0.727649 | 0.979989 | 0.026007 |
| AP1S1    | 1.186116 | 0.814642 | 1.726981 | 0.373224 |
| C1GALT1  | 0.632836 | 0.430837 | 0.929544 | 0.019679 |
| PLOD3    | 0.970113 | 0.733213 | 1.283555 | 0.831785 |
| RPA3     | 1.003372 | 0.630006 | 1.598009 | 0.988688 |
| ZNHIT1   | 0.978207 | 0.57665  | 1.659392 | 0.934872 |
| CLDN15   | 0.811549 | 0.580657 | 1.134254 | 0.221535 |
| GLCCI1   | 1.043154 | 0.834762 | 1.30357  | 0.710215 |

|          |          |          |          |          |
|----------|----------|----------|----------|----------|
| PHF14    | 0.69522  | 0.478021 | 1.01111  | 0.057151 |
| NRF1     | 0.588257 | 0.310649 | 1.113944 | 0.10337  |
| TMEM106I | 0.97879  | 0.698782 | 1.370999 | 0.900767 |
| EZH2     | 0.756537 | 0.521821 | 1.096828 | 0.14095  |
| ZNF862   | 1.213345 | 0.87879  | 1.675265 | 0.240024 |
| SFRP4    | 0.742123 | 0.468974 | 1.174365 | 0.202807 |
| MEST     | 0.887477 | 0.784753 | 1.003649 | 0.057179 |
| ANKMY2   | 0.716657 | 0.487822 | 1.052837 | 0.089583 |
| TSPAN13  | 1.002678 | 0.863617 | 1.16413  | 0.971993 |
| RARRES2  | 0.874132 | 0.665889 | 1.147497 | 0.332562 |
| AGR2     | 0.986015 | 0.81522  | 1.192594 | 0.884619 |
| AHR      | 1.156514 | 0.9889   | 1.352537 | 0.068722 |
| CHCHD3   | 1.212383 | 0.723432 | 2.031804 | 0.464751 |
| GIMAP2   | 1.080783 | 0.843794 | 1.384332 | 0.538478 |
| TMEM176I | 0.967987 | 0.870784 | 1.07604  | 0.546769 |
| PSMA2    | 0.48791  | 0.276014 | 0.862479 | 0.013551 |
| MRPL32   | 0.642497 | 0.356001 | 1.159556 | 0.141956 |
| BLVRA    | 1.069806 | 0.913782 | 1.252469 | 0.401498 |
| STAG3L4  | 0.473903 | 0.27339  | 0.821478 | 0.0078   |
| RHEB     | 0.698264 | 0.398666 | 1.223011 | 0.209128 |
| PRKAG2   | 0.66105  | 0.419872 | 1.040763 | 0.073868 |
| AEBP1    | 0.855271 | 0.73189  | 0.999452 | 0.049199 |
| POLD2    | 1.090839 | 0.744571 | 1.598141 | 0.65543  |
| BCL7B    | 1.326636 | 0.829587 | 2.121494 | 0.238002 |
| YKT6     | 1.071464 | 0.6211   | 1.848391 | 0.804053 |
| TBL2     | 0.673392 | 0.369147 | 1.228391 | 0.197304 |
| CLIP2    | 1.010269 | 0.859185 | 1.187921 | 0.901619 |
| EIF4H    | 1.09712  | 0.651391 | 1.847848 | 0.727491 |
| LIMK1    | 1.559918 | 1.09668  | 2.21883  | 0.013386 |
| FKTN     | 0.703979 | 0.457037 | 1.084346 | 0.111259 |
| FSD1L    | 0.954376 | 0.646661 | 1.408516 | 0.814097 |
| CNTNAP3  | 0.652338 | 0.287792 | 1.478656 | 0.306231 |
| SPIN1    | 0.778457 | 0.547706 | 1.106425 | 0.162665 |
| PRUNE2   | 1.177699 | 0.897462 | 1.545442 | 0.238123 |
| MEGF9    | 1.110348 | 0.941455 | 1.309539 | 0.213737 |
| TRIM14   | 1.046303 | 0.709037 | 1.543998 | 0.819652 |
| CORO2A   | 1.008037 | 0.821    | 1.237683 | 0.939066 |
| TGFBR1   | 0.921099 | 0.635459 | 1.335133 | 0.664334 |
| SEC61B   | 1.276008 | 0.838353 | 1.942138 | 0.255424 |
| C5       | 0.89451  | 0.675727 | 1.184128 | 0.435986 |
| OGN      | 0.926746 | 0.676439 | 1.269678 | 0.635791 |
| ASPN     | 0.827454 | 0.64493  | 1.061634 | 0.136333 |
| ECM2     | 0.955443 | 0.721571 | 1.265117 | 0.750327 |
| TLE4     | 1.20758  | 0.910279 | 1.601981 | 0.190856 |
| LHX6     | 1.078813 | 0.923722 | 1.259944 | 0.338066 |
| PTGR1    | 0.867373 | 0.713344 | 1.054661 | 0.153744 |
| SUSD1    | 1.006785 | 0.704557 | 1.438656 | 0.970383 |
| AKNA     | 1.259589 | 0.871293 | 1.82093  | 0.219715 |
| TNFSF8   | 1.217458 | 0.997785 | 1.485495 | 0.052609 |
| DNM1     | 0.816669 | 0.705377 | 0.945521 | 0.00674  |
| ENG      | 1.217318 | 0.994537 | 1.490002 | 0.056541 |
| AK1      | 1.927653 | 1.262571 | 2.943078 | 0.002367 |
| CDC37L1  | 0.756412 | 0.453545 | 1.261527 | 0.284738 |
| TBC1D13  | 1.426074 | 0.95655  | 2.126063 | 0.081518 |
| DOCK8    | 1.089033 | 0.765366 | 1.549574 | 0.635521 |
| KANK1    | 0.758771 | 0.593287 | 0.970413 | 0.027861 |
| TESK1    | 1.004686 | 0.736048 | 1.371372 | 0.976504 |
| FUBP3    | 0.766992 | 0.361398 | 1.627778 | 0.489596 |

|           |          |          |          |          |
|-----------|----------|----------|----------|----------|
| CREB3     | 3.758782 | 1.931495 | 7.31477  | 9.71E-05 |
| RGP1      | 1.516997 | 0.897434 | 2.564288 | 0.119726 |
| DDX58     | 1.156812 | 0.802229 | 1.668121 | 0.435388 |
| EDF1      | 1.655676 | 0.990044 | 2.768828 | 0.054628 |
| PIP5K1B   | 0.957687 | 0.781    | 1.174347 | 0.677784 |
| GLIS3     | 0.594223 | 0.397464 | 0.888384 | 0.011188 |
| BAG1      | 1.631974 | 0.867776 | 3.069156 | 0.128543 |
| RAPGEF1   | 1.248876 | 0.88525  | 1.761867 | 0.205594 |
| NPDC1     | 1.010649 | 0.900654 | 1.134077 | 0.857013 |
| APBA1     | 0.885032 | 0.725416 | 1.079768 | 0.228735 |
| SETX      | 0.966672 | 0.681121 | 1.371936 | 0.849504 |
| PTGDS     | 1.018028 | 0.837362 | 1.237673 | 0.857743 |
| ABCA2     | 1.002647 | 0.837892 | 1.199798 | 0.97697  |
| SHB       | 1.622269 | 1.037134 | 2.537527 | 0.034031 |
| UBE2R2    | 1.346536 | 0.737659 | 2.457991 | 0.332541 |
| EXOSC3    | 0.856733 | 0.521098 | 1.408548 | 0.542153 |
| ZFAND5    | 0.83547  | 0.564527 | 1.236451 | 0.368774 |
| DVL1      | 1.182866 | 0.851271 | 1.643626 | 0.317029 |
| PDLIM1    | 1.146096 | 0.996144 | 1.31862  | 0.056656 |
| CCNJ      | 0.754616 | 0.482228 | 1.180863 | 0.217832 |
| DNTT      | 0.991911 | 0.926153 | 1.062338 | 0.816482 |
| GATA3     | 0.99817  | 0.820943 | 1.213658 | 0.98535  |
| HPS1      | 1.822896 | 1.202199 | 2.76406  | 0.004698 |
| PHYH      | 1.242759 | 0.849316 | 1.818462 | 0.263129 |
| RASSF4    | 1.067209 | 0.919482 | 1.238671 | 0.392171 |
| DNMBP     | 1.301916 | 0.961301 | 1.763221 | 0.088209 |
| RAB11FIP2 | 0.658371 | 0.390185 | 1.11089  | 0.117353 |
| CXCL12    | 0.917796 | 0.836959 | 1.00644  | 0.068229 |
| ERLIN1    | 0.80016  | 0.564942 | 1.133312 | 0.209362 |
| EIF3A     | 0.772593 | 0.550382 | 1.084521 | 0.135949 |
| CUBN      | 1.022535 | 0.730276 | 1.431757 | 0.896763 |
| TRDMT1    | 0.950988 | 0.617491 | 1.464603 | 0.819582 |
| DDX50     | 1.010664 | 0.635876 | 1.606352 | 0.964213 |
| MAPK8     | 0.715567 | 0.446493 | 1.146796 | 0.164294 |
| SEC23IP   | 1.071227 | 0.62641  | 1.831912 | 0.801554 |
| ATE1      | 0.738371 | 0.466528 | 1.168614 | 0.195391 |
| NSMCE4A   | 1.756175 | 0.9489   | 3.250241 | 0.072979 |
| PLEKHA1   | 0.997881 | 0.694155 | 1.434502 | 0.990861 |
| UNC5B     | 1.120324 | 0.873399 | 1.437057 | 0.37111  |
| CDH23     | 1.3147   | 1.050559 | 1.645254 | 0.016803 |
| SPOCK2    | 1.153478 | 0.954065 | 1.394571 | 0.140377 |
| PPP3CB    | 0.60033  | 0.335654 | 1.073712 | 0.085395 |
| BMPR1A    | 0.799044 | 0.567004 | 1.126045 | 0.19994  |
| MINPP1    | 0.969409 | 0.74878  | 1.255046 | 0.813584 |
| ACTA2     | 1.052442 | 0.736353 | 1.504216 | 0.7791   |
| LIPA      | 1.466351 | 1.12944  | 1.903763 | 0.004055 |
| LZTS2     | 1.554539 | 1.121114 | 2.155528 | 0.008157 |
| SFXN3     | 1.552198 | 1.210624 | 1.990144 | 0.000526 |
| KAZALD1   | 1.41893  | 1.09992  | 1.830463 | 0.007083 |
| FBXW4     | 2.55129  | 1.563871 | 4.162159 | 0.000176 |
| NPM3      | 1.174779 | 0.824054 | 1.674775 | 0.373288 |
| TNKS2     | 0.967171 | 0.603088 | 1.551051 | 0.889832 |
| GBF1      | 1.113341 | 0.641716 | 1.931583 | 0.702516 |
| ARHGAP2   | 0.958125 | 0.819544 | 1.120138 | 0.591502 |
| CPEB3     | 1.232046 | 0.816551 | 1.858961 | 0.320076 |
| FBXL15    | 1.511761 | 1.072391 | 2.131144 | 0.01833  |
| CUEDC2    | 1.995286 | 1.183341 | 3.364345 | 0.009556 |
| SUFU      | 1.857941 | 1.095352 | 3.151448 | 0.021574 |

|          |          |          |          |          |
|----------|----------|----------|----------|----------|
| ANKRD26  | 0.679737 | 0.477456 | 0.967717 | 0.03219  |
| ACBD5    | 0.698092 | 0.378233 | 1.288444 | 0.250377 |
| LHPP     | 1.410941 | 0.976179 | 2.039333 | 0.066998 |
| LARP4B   | 1.097628 | 0.605828 | 1.988664 | 0.758689 |
| GTPBP4   | 1.103695 | 0.718049 | 1.696463 | 0.652826 |
| BCCIP    | 1.150914 | 0.694384 | 1.907594 | 0.585612 |
| MTPAP    | 0.669672 | 0.378918 | 1.18353  | 0.167579 |
| SH3PXD2A | 1.036005 | 0.861016 | 1.246557 | 0.707871 |
| PITRM1   | 1.461782 | 0.842019 | 2.537718 | 0.177342 |
| MAP3K8   | 0.989713 | 0.769002 | 1.273769 | 0.935981 |
| EBF3     | 0.774476 | 0.606528 | 0.98893  | 0.04044  |
| GLRX3    | 1.022594 | 0.552177 | 1.893774 | 0.943349 |
| SORCS1   | 0.997982 | 0.749886 | 1.328159 | 0.988945 |
| XPNPEP1  | 1.309718 | 0.787316 | 2.178743 | 0.298772 |
| SMC3     | 0.967123 | 0.660974 | 1.415073 | 0.863322 |
| SHOC2    | 0.985626 | 0.592461 | 1.639701 | 0.955541 |
| TFAM     | 1.002497 | 0.674478 | 1.490042 | 0.99016  |
| CCDC6    | 1.823417 | 1.198564 | 2.774027 | 0.005016 |
| CUL2     | 1.101943 | 0.622133 | 1.951797 | 0.739273 |
| CCNY     | 1.235548 | 0.820397 | 1.860781 | 0.311344 |
| UBE2S    | 0.958553 | 0.648424 | 1.417011 | 0.831908 |
| RPL28    | 1.651184 | 1.103627 | 2.470408 | 0.014702 |
| ZMIZ1    | 1.404548 | 1.055916 | 1.868288 | 0.01961  |
| DNAJC12  | 1.043988 | 0.907911 | 1.20046  | 0.545751 |
| PPIF     | 1.875768 | 1.352853 | 2.600804 | 0.000162 |
| PBLD     | 0.482885 | 0.278941 | 0.835941 | 0.009323 |
| TSPAN14  | 1.314809 | 0.995531 | 1.736484 | 0.053805 |
| TBC1D12  | 1.368129 | 1.131074 | 1.654866 | 0.001244 |
| KRT23    | 1.119755 | 0.885856 | 1.415412 | 0.344076 |
| CRYBA1   | 0.748324 | 0.5036   | 1.11197  | 0.151362 |
| NUFIP2   | 0.732986 | 0.468142 | 1.147662 | 0.174496 |
| GIT1     | 1.01541  | 0.693019 | 1.487777 | 0.937457 |
| RPL19    | 1.29517  | 0.844942 | 1.985301 | 0.235295 |
| FBXL20   | 0.510865 | 0.324093 | 0.805271 | 0.003819 |
| RUNDC3A  | 0.833849 | 0.589888 | 1.178705 | 0.303514 |
| UBTF     | 1.351735 | 0.76398  | 2.39167  | 0.300556 |
| CSF3     | 0.460452 | 0.161572 | 1.312207 | 0.146654 |
| PSMD3    | 1.832475 | 1.048921 | 3.201351 | 0.033357 |
| CASC3    | 0.732583 | 0.373826 | 1.435638 | 0.364659 |
| RAPGEFL1 | 0.730796 | 0.481985 | 1.108049 | 0.139724 |
| RGS9     | 1.387568 | 0.802414 | 2.39944  | 0.241119 |
| RNF43    | 0.837474 | 0.61365  | 1.142938 | 0.263611 |
| RAD51C   | 1.021707 | 0.610232 | 1.710637 | 0.934912 |
| MTMR4    | 0.741336 | 0.534043 | 1.029092 | 0.07368  |
| TRIM37   | 1.093365 | 0.683516 | 1.748965 | 0.709586 |
| P2RX1    | 1.010311 | 0.769916 | 1.325766 | 0.941018 |
| DHX40    | 0.860621 | 0.549169 | 1.348708 | 0.51256  |
| TUBD1    | 0.713805 | 0.449638 | 1.133175 | 0.152784 |
| KPNB1    | 1.324082 | 0.810602 | 2.162829 | 0.262177 |
| GOSR2    | 0.879916 | 0.5346   | 1.448281 | 0.61484  |
| PNPO     | 1.877747 | 1.214106 | 2.904141 | 0.004626 |
| RPS6KB1  | 0.614714 | 0.352589 | 1.071712 | 0.086206 |
| TRIM16L  | 1.27395  | 0.853756 | 1.900952 | 0.235745 |
| CDK5RAP3 | 0.912529 | 0.645722 | 1.289578 | 0.603944 |
| CBX1     | 1.177593 | 0.835946 | 1.658869 | 0.349773 |
| RECQL5   | 1.076188 | 0.656785 | 1.763409 | 0.770728 |
| PIGL     | 0.744625 | 0.514371 | 1.077951 | 0.118223 |
| GALK1    | 1.659866 | 1.123733 | 2.451788 | 0.010893 |

|          |          |          |          |          |
|----------|----------|----------|----------|----------|
| INTS2    | 0.768507 | 0.492451 | 1.199314 | 0.246227 |
| CAMTA2   | 1.320745 | 0.934298 | 1.867035 | 0.115217 |
| MED13    | 0.728508 | 0.472663 | 1.122837 | 0.151268 |
| HOXB6    | 1.185985 | 1.050897 | 1.338438 | 0.0057   |
| ENO3     | 1.400189 | 0.958011 | 2.046457 | 0.082136 |
| PFN1     | 1.809423 | 1.207652 | 2.711055 | 0.004046 |
| RNF167   | 1.714077 | 1.07226  | 2.740061 | 0.024356 |
| SLC25A11 | 1.34948  | 0.854762 | 2.13053  | 0.198301 |
| RASD1    | 1.157427 | 1.012768 | 1.322749 | 0.031856 |
| CHRNE    | 0.999554 | 0.728718 | 1.371047 | 0.99779  |
| RAI1     | 1.029554 | 0.74797  | 1.417145 | 0.858203 |
| NUP88    | 1.132703 | 0.673866 | 1.903963 | 0.638164 |
| C1QBP    | 1.286363 | 0.870748 | 1.900356 | 0.20594  |
| SLC6A4   | 0.83416  | 0.420909 | 1.653142 | 0.603352 |
| BLMH     | 1.159714 | 0.80865  | 1.663188 | 0.42056  |
| CPD      | 0.825255 | 0.630705 | 1.079817 | 0.161468 |
| GOSR1    | 0.623871 | 0.341537 | 1.139599 | 0.124819 |
| CCDC47   | 1.037615 | 0.667738 | 1.612376 | 0.869583 |
| MED31    | 0.770637 | 0.454325 | 1.307174 | 0.33385  |
| DRG2     | 1.3034   | 0.805026 | 2.110307 | 0.281124 |
| FTSJ3    | 1.107746 | 0.701431 | 1.749424 | 0.660738 |
| AKAP10   | 0.90787  | 0.586284 | 1.405851 | 0.664868 |
| SMARCD2  | 1.608256 | 0.914432 | 2.82852  | 0.099058 |
| ICAM2    | 1.511368 | 1.006079 | 2.270431 | 0.046684 |
| SYNGR2   | 1.110706 | 0.788544 | 1.56449  | 0.548019 |
| B9D1     | 1.543744 | 1.04961  | 2.270506 | 0.027388 |
| UTP6     | 1.118149 | 0.662603 | 1.886887 | 0.675727 |
| DDX5     | 0.932009 | 0.629663 | 1.379532 | 0.724901 |
| CYTH1    | 1.442571 | 1.010721 | 2.058939 | 0.043517 |
| PSMD11   | 1.05645  | 0.507265 | 2.200202 | 0.883363 |
| LGALS3BP | 1.108383 | 0.995951 | 1.233507 | 0.059346 |
| CCL7     | 1.329518 | 0.743772 | 2.37656  | 0.336513 |
| CCL2     | 1.221238 | 0.905921 | 1.646307 | 0.189661 |
| CCL1     | 1.022222 | 0.886716 | 1.178437 | 0.761951 |
| PEX12    | 1.212808 | 0.866297 | 1.697919 | 0.261058 |
| DHX58    | 1.445034 | 1.00803  | 2.071489 | 0.045125 |
| KAT2A    | 1.106038 | 0.805568 | 1.51858  | 0.533186 |
| RAB5C    | 1.922668 | 1.201918 | 3.07563  | 0.006386 |
| NAGLU    | 0.897954 | 0.58886  | 1.369294 | 0.617079 |
| HSD17B1  | 0.561938 | 0.225531 | 1.400135 | 0.215943 |
| MLX      | 1.586519 | 0.961837 | 2.616911 | 0.070673 |
| CNTNAP1  | 1.283131 | 0.921917 | 1.785871 | 0.139413 |
| ABI3     | 1.298918 | 1.1106   | 1.519167 | 0.001066 |
| EZH1     | 0.91102  | 0.616576 | 1.346075 | 0.639876 |
| DLX4     | 0.905805 | 0.701829 | 1.169065 | 0.447259 |
| PPP1R9B  | 1.594717 | 1.059382 | 2.40057  | 0.025326 |
| COL1A1   | 0.903236 | 0.745761 | 1.093962 | 0.297786 |
| MRPL27   | 1.217254 | 0.613104 | 2.416731 | 0.574221 |
| VAT1     | 0.848091 | 0.66667  | 1.078882 | 0.179693 |
| LRRC59   | 1.139661 | 0.765631 | 1.696415 | 0.519487 |
| RND2     | 0.791681 | 0.464961 | 1.347981 | 0.389639 |
| ALOX12   | 0.955777 | 0.681797 | 1.339857 | 0.792982 |
| HDAC5    | 1.303455 | 0.90581  | 1.875664 | 0.153518 |
| ABCC3    | 1.203396 | 1.000249 | 1.447801 | 0.049692 |
| MPP2     | 1.125498 | 0.82303  | 1.539126 | 0.459093 |
| SMURF2   | 0.422432 | 0.264166 | 0.675517 | 0.000321 |
| DUSP3    | 1.094369 | 0.78924  | 1.517463 | 0.588692 |
| EFTUD2   | 1.207647 | 0.666111 | 2.189441 | 0.53425  |



|          |          |          |          |          |
|----------|----------|----------|----------|----------|
| HLF      | 1.102426 | 0.922617 | 1.317278 | 0.283093 |
| SLC16A6  | 1.030927 | 0.824832 | 1.288518 | 0.788961 |
| PRKAR1A  | 0.799733 | 0.515639 | 1.24035  | 0.318263 |
| FAM20A   | 1.018963 | 0.754116 | 1.376825 | 0.902643 |
| YWHAE    | 1.464615 | 0.879264 | 2.439649 | 0.142722 |
| MMD      | 1.453248 | 1.076562 | 1.961735 | 0.014611 |
| RANGRF   | 1.148913 | 0.707832 | 1.864851 | 0.574311 |
| DPH1     | 1.078222 | 0.727573 | 1.597866 | 0.707464 |
| MAP2K6   | 1.092831 | 0.789027 | 1.51361  | 0.593233 |
| DHRS7B   | 1.354451 | 0.828143 | 2.215244 | 0.226773 |
| WSB1     | 0.789599 | 0.532061 | 1.171796 | 0.240857 |
| RCVRN    | 1.007494 | 0.716486 | 1.416697 | 0.965758 |
| SLC9A3R1 | 1.473307 | 1.027605 | 2.112322 | 0.035022 |
| MYH3     | 0.8748   | 0.613543 | 1.247305 | 0.459894 |
| NAT9     | 1.061392 | 0.66855  | 1.685069 | 0.800547 |
| TMEM104  | 1.47734  | 1.105773 | 1.973762 | 0.008286 |
| VTN      | 1.03989  | 0.755856 | 1.430658 | 0.81009  |
| TNFAIP1  | 1.174585 | 0.722156 | 1.91046  | 0.516743 |
| IFT20    | 0.708095 | 0.465805 | 1.076412 | 0.10623  |
| TMEM97   | 1.254829 | 0.98528  | 1.598119 | 0.065801 |
| CDR2L    | 0.86165  | 0.595762 | 1.246203 | 0.428998 |
| PMP22    | 0.831279 | 0.640673 | 1.078593 | 0.164343 |
| UNC119   | 1.463526 | 1.127907 | 1.89901  | 0.004162 |
| ALDOC    | 1.369769 | 1.088058 | 1.72442  | 0.007398 |
| SUPT6H   | 1.269584 | 0.759599 | 2.121966 | 0.362416 |
| RAB34    | 1.202863 | 1.009957 | 1.432616 | 0.038354 |
| PHF12    | 0.933148 | 0.533408 | 1.632459 | 0.808411 |
| TMEM33   | 0.912632 | 0.574308 | 1.450262 | 0.698854 |
| GNRHR    | 0.641405 | 0.459023 | 0.896251 | 0.009277 |
| SLAIN2   | 0.704445 | 0.41294  | 1.201731 | 0.198573 |
| OCIAD1   | 0.78769  | 0.419648 | 1.478514 | 0.457589 |
| DCUN1D4  | 0.611849 | 0.407638 | 0.91836  | 0.01774  |
| USP46    | 0.678576 | 0.434725 | 1.059209 | 0.087864 |
| CHIC2    | 0.43592  | 0.235    | 0.808624 | 0.008444 |
| NMU      | 0.973943 | 0.811713 | 1.168598 | 0.776408 |
| PF4V1    | 0.899034 | 0.6296   | 1.283771 | 0.558153 |
| NFKB1    | 1.476896 | 0.957205 | 2.278739 | 0.078019 |
| AREG     | 1.136077 | 1.043407 | 1.236977 | 0.003296 |
| MANBA    | 0.632709 | 0.410197 | 0.975922 | 0.038435 |
| UBE2D3   | 0.818597 | 0.453408 | 1.477922 | 0.506667 |
| ELF2     | 0.378584 | 0.224921 | 0.63723  | 0.000256 |
| NDUFC1   | 2.514668 | 1.381697 | 4.576656 | 0.002543 |
| TBC1D9   | 1.172775 | 0.987355 | 1.393016 | 0.069518 |
| ZNF330   | 1.083201 | 0.657758 | 1.783822 | 0.753512 |
| INPP4B   | 1.143237 | 0.970185 | 1.347157 | 0.109929 |
| GAB1     | 0.941347 | 0.689439 | 1.285299 | 0.703656 |
| KLHL2    | 1.360924 | 1.014701 | 1.82528  | 0.039648 |
| RPL34    | 0.811628 | 0.537051 | 1.226586 | 0.321876 |
| WFS1     | 1.208932 | 1.023776 | 1.427574 | 0.025286 |
| GRPEL1   | 1.248926 | 0.794406 | 1.963501 | 0.335586 |
| GAR1     | 0.878059 | 0.561593 | 1.372856 | 0.568489 |
| FRG1     | 1.012435 | 0.578077 | 1.773162 | 0.965526 |
| CLCN3    | 1.222618 | 0.888582 | 1.682224 | 0.217034 |
| AADAT    | 0.984636 | 0.859672 | 1.127766 | 0.823077 |
| GALNT7   | 0.613382 | 0.447445 | 0.840857 | 0.00239  |
| DHX15    | 0.632815 | 0.398856 | 1.004008 | 0.052019 |
| SEPSECS  | 0.70977  | 0.441918 | 1.139969 | 0.15617  |
| SLC2A9   | 1.172373 | 0.959687 | 1.432196 | 0.119452 |

|          |          |          |          |          |
|----------|----------|----------|----------|----------|
| FBXW7    | 0.976587 | 0.633908 | 1.504512 | 0.914435 |
| NEIL3    | 0.922024 | 0.728825 | 1.166438 | 0.4986   |
| TBC1D19  | 0.691734 | 0.451377 | 1.060082 | 0.090629 |
| CLNK     | 1.258945 | 1.080138 | 1.467351 | 0.003216 |
| SH3D19   | 0.971073 | 0.728079 | 1.295166 | 0.841661 |
| STIM2    | 2.371586 | 1.498081 | 3.754416 | 0.000229 |
| MFSD10   | 0.958271 | 0.775748 | 1.183739 | 0.692568 |
| GLRB     | 0.813894 | 0.56716  | 1.167966 | 0.263808 |
| BST1     | 1.042631 | 0.891195 | 1.2198   | 0.60211  |
| RAPGEF2  | 1.10994  | 0.830943 | 1.482612 | 0.480084 |
| HGFAC    | 0.886625 | 0.507883 | 1.547805 | 0.672079 |
| SNX25    | 1.162764 | 0.936778 | 1.443265 | 0.17142  |
| LRP2BP   | 1.210324 | 0.889889 | 1.646143 | 0.22379  |
| UFSP2    | 0.955021 | 0.608057 | 1.499968 | 0.841641 |
| KLF3     | 1.096831 | 0.74921  | 1.605743 | 0.634602 |
| KLHL5    | 1.025318 | 0.74471  | 1.411659 | 0.878201 |
| NCAPG    | 0.980572 | 0.736181 | 1.306093 | 0.893289 |
| UGDH     | 0.618444 | 0.428304 | 0.892992 | 0.010354 |
| HTATIP2  | 1.494869 | 1.187125 | 1.882391 | 0.00063  |
| CTSC     | 0.846563 | 0.57483  | 1.246749 | 0.399029 |
| CCDC34   | 0.97289  | 0.733553 | 1.290316 | 0.848706 |
| ZBTB16   | 0.868964 | 0.734642 | 1.027845 | 0.10113  |
| ELP4     | 0.905232 | 0.479574 | 1.708691 | 0.758714 |
| MTCH2    | 1.256491 | 0.607318 | 2.599578 | 0.538206 |
| FNBP4    | 1.086127 | 0.606412 | 1.945329 | 0.781136 |
| TECTA    | 0.880832 | 0.428577 | 1.810329 | 0.729929 |
| CRTAM    | 1.411774 | 1.05805  | 1.883754 | 0.019108 |
| HSPA8    | 1.260076 | 0.87857  | 1.807245 | 0.208981 |
| VWA5A    | 1.415642 | 1.150728 | 1.741545 | 0.001009 |
| DNAJC4   | 1.585453 | 1.047951 | 2.398644 | 0.029133 |
| SIAE     | 1.061549 | 0.82743  | 1.36191  | 0.638465 |
| LPXN     | 1.293365 | 0.995    | 1.6812   | 0.054542 |
| DTX4     | 1.189739 | 1.004258 | 1.409477 | 0.044527 |
| ATG2A    | 1.339752 | 0.910213 | 1.971995 | 0.138082 |
| EHD1     | 1.265881 | 0.904875 | 1.770913 | 0.168696 |
| OSBP     | 0.951896 | 0.508539 | 1.781783 | 0.877509 |
| UNC93B1  | 1.503581 | 1.204184 | 1.877418 | 0.000318 |
| PUS3     | 1.059714 | 0.685791 | 1.637515 | 0.793927 |
| DCPS     | 1.27158  | 0.762455 | 2.120672 | 0.357219 |
| FOXRED1  | 1.476434 | 0.899345 | 2.423829 | 0.123436 |
| NRXN2    | 1.128127 | 0.980536 | 1.297934 | 0.091949 |
| MS4A6A   | 1.126575 | 1.021904 | 1.241966 | 0.016599 |
| MS4A4A   | 1.174577 | 1.047485 | 1.31709  | 0.005888 |
| ST3GAL4  | 0.896411 | 0.734059 | 1.094671 | 0.283412 |
| CPT1A    | 1.346858 | 0.938342 | 1.933226 | 0.106346 |
| CCND1    | 1.067386 | 0.89317  | 1.275585 | 0.473196 |
| CCDC86   | 1.273074 | 0.863577 | 1.876751 | 0.222746 |
| PRPF19   | 2.233369 | 1.353027 | 3.686501 | 0.001676 |
| TMEM109  | 2.064369 | 1.380764 | 3.086421 | 0.000412 |
| HPX      | 1.47959  | 0.737547 | 2.968201 | 0.27006  |
| TRIM3    | 1.121357 | 0.81938  | 1.534626 | 0.474284 |
| CHORDC1  | 0.686808 | 0.399629 | 1.18036  | 0.173893 |
| FOLR1    | 1.535268 | 0.936758 | 2.516174 | 0.088984 |
| FOLR3    | 1.131573 | 0.971736 | 1.317701 | 0.111623 |
| PANX1    | 1.385687 | 0.999025 | 1.922003 | 0.050687 |
| ARHGEF17 | 0.926533 | 0.776887 | 1.105004 | 0.395876 |
| CEP164   | 1.632651 | 0.992287 | 2.686269 | 0.05367  |
| RNF141   | 1.102173 | 0.739176 | 1.643431 | 0.633166 |

|          |          |          |          |          |
|----------|----------|----------|----------|----------|
| EIF4G2   | 0.820984 | 0.522528 | 1.289912 | 0.39219  |
| IL10RA   | 1.122939 | 0.96508  | 1.306618 | 0.133587 |
| BIRC2    | 1.194391 | 0.733925 | 1.943755 | 0.474651 |
| UBE4A    | 0.962058 | 0.647512 | 1.429403 | 0.848154 |
| DDX6     | 0.840103 | 0.54095  | 1.304693 | 0.437894 |
| UPK2     | 2.274918 | 1.038248 | 4.984604 | 0.04     |
| CBL      | 1.097301 | 0.795921 | 1.512801 | 0.57088  |
| HIPK3    | 0.958342 | 0.674634 | 1.361359 | 0.812209 |
| FBXO3    | 0.759383 | 0.482333 | 1.195567 | 0.234589 |
| PDHX     | 1.061978 | 0.634726 | 1.776824 | 0.818878 |
| SLC1A2   | 0.388064 | 0.10496  | 1.434774 | 0.155944 |
| COMMD9   | 1.517735 | 0.944898 | 2.43785  | 0.084428 |
| SLC15A3  | 1.211359 | 1.058509 | 1.386282 | 0.005333 |
| CD5      | 1.057026 | 0.869752 | 1.284623 | 0.577248 |
| ACCS     | 0.756149 | 0.616411 | 0.927565 | 0.007335 |
| MDK      | 0.922266 | 0.775103 | 1.097371 | 0.361583 |
| AMBRA1   | 0.97268  | 0.614156 | 1.540501 | 0.906011 |
| MADD     | 1.283024 | 0.804596 | 2.045937 | 0.295203 |
| PTPMT1   | 1.685318 | 0.832392 | 3.41221  | 0.14699  |
| SLC22A18 | 1.211826 | 0.938975 | 1.563964 | 0.139898 |
| CD81     | 1.159025 | 0.895536 | 1.500038 | 0.262073 |
| SLC35F2  | 0.892903 | 0.719751 | 1.107711 | 0.303054 |
| SOX6     | 0.776012 | 0.519997 | 1.158075 | 0.214429 |
| PITPNM1  | 1.230513 | 0.939107 | 1.612342 | 0.132494 |
| RPS13    | 1.132025 | 0.710638 | 1.803283 | 0.601659 |
| AIP      | 1.694481 | 1.084099 | 2.648526 | 0.02065  |
| NUP98    | 0.89607  | 0.550387 | 1.458869 | 0.65901  |
| NDUFS8   | 1.850565 | 1.308492 | 2.617203 | 0.000501 |
| TCIRG1   | 1.308089 | 1.080776 | 1.583212 | 0.005824 |
| CHKA     | 0.971386 | 0.640673 | 1.472812 | 0.891257 |
| EXPH5    | 1.201437 | 0.932982 | 1.547136 | 0.15493  |
| HPS5     | 1.103537 | 0.692439 | 1.758701 | 0.678639 |
| GTF2H1   | 1.043499 | 0.667355 | 1.631649 | 0.851902 |
| POU2AF1  | 1.122018 | 0.884503 | 1.423313 | 0.342789 |
| VWF      | 1.172312 | 1.028426 | 1.336329 | 0.017336 |
| PSMD9    | 0.818201 | 0.4012   | 1.668629 | 0.581065 |
| PPFIBP1  | 1.027974 | 0.787016 | 1.342706 | 0.83956  |
| PRPF40B  | 0.736383 | 0.448174 | 1.209932 | 0.227122 |
| CD69     | 1.084713 | 0.933683 | 1.260173 | 0.287796 |
| PRDM4    | 1.217792 | 0.715557 | 2.072537 | 0.467663 |
| CLEC2B   | 1.292254 | 1.084024 | 1.540484 | 0.004238 |
| COQ5     | 1.085304 | 0.624024 | 1.887565 | 0.771886 |
| SELPLG   | 1.604691 | 1.237093 | 2.08152  | 0.000367 |
| CORO1C   | 1.546502 | 1.09183  | 2.190513 | 0.014105 |
| CAPRIN2  | 0.951676 | 0.767866 | 1.179487 | 0.651021 |
| TSPAN11  | 0.794729 | 0.461301 | 1.369161 | 0.407757 |
| KCTD10   | 1.355541 | 0.734916 | 2.500274 | 0.330105 |
| SLC11A2  | 0.788174 | 0.530081 | 1.171931 | 0.239559 |
| MLEC     | 0.740255 | 0.487497 | 1.124066 | 0.158183 |
| MVK      | 1.984152 | 1.184725 | 3.323016 | 0.009208 |
| CSRNP2   | 0.63679  | 0.400407 | 1.012721 | 0.056577 |
| CAMKK2   | 0.870911 | 0.572919 | 1.323895 | 0.517727 |
| BIN2     | 1.810508 | 1.266954 | 2.58726  | 0.001118 |
| IL23A    | 1.146303 | 0.780379 | 1.683812 | 0.486439 |
| PTGES3   | 0.940925 | 0.548555 | 1.61395  | 0.824949 |
| BCL7A    | 1.046559 | 0.84148  | 1.301619 | 0.68257  |
| RSRC2    | 0.67183  | 0.413393 | 1.091833 | 0.108415 |
| CYP27B1  | 1.0401   | 0.750425 | 1.441593 | 0.813383 |

|          |          |          |          |          |
|----------|----------|----------|----------|----------|
| LIN7A    | 0.839112 | 0.74237  | 0.948461 | 0.005007 |
| KRT18    | 0.979576 | 0.875592 | 1.09591  | 0.718546 |
| GLI1     | 1.116981 | 0.806854 | 1.54631  | 0.504982 |
| PPM1H    | 0.797268 | 0.665147 | 0.955633 | 0.01425  |
| METAP2   | 1.167462 | 0.763024 | 1.786271 | 0.475514 |
| LTA4H    | 1.227095 | 0.965862 | 1.558982 | 0.093821 |
| ELK3     | 1.342709 | 0.978836 | 1.841849 | 0.067652 |
| SLC6A12  | 1.119779 | 0.864778 | 1.449972 | 0.390862 |
| WNT5B    | 1.284667 | 0.915555 | 1.802589 | 0.147207 |
| MAGOHB   | 0.735037 | 0.436469 | 1.237841 | 0.247028 |
| TRPV4    | 1.267598 | 0.988095 | 1.626164 | 0.062079 |
| ITFG2    | 0.799443 | 0.488827 | 1.307432 | 0.372459 |
| FOXM1    | 1.091409 | 0.779866 | 1.527407 | 0.61     |
| PRR4     | 0.726285 | 0.507479 | 1.039432 | 0.080375 |
| PARP11   | 0.901631 | 0.588811 | 1.380644 | 0.633856 |
| ARPC3    | 1.553368 | 0.97173  | 2.483149 | 0.065747 |
| GPN3     | 1.134023 | 0.804502 | 1.598515 | 0.47273  |
| VPS29    | 1.104039 | 0.616412 | 1.977414 | 0.73925  |
| RAD51AP1 | 1.018165 | 0.764505 | 1.355989 | 0.901998 |
| CUX2     | 1.075044 | 0.878391 | 1.315722 | 0.482665 |
| SH2B3    | 1.516144 | 1.110213 | 2.070497 | 0.008856 |
| MANSC1   | 1.372038 | 1.119907 | 1.680934 | 0.002265 |
| DUSP16   | 0.843487 | 0.604012 | 1.177907 | 0.317808 |
| CREBL2   | 1.083512 | 0.742417 | 1.58132  | 0.677536 |
| ACAD10   | 0.894347 | 0.519745 | 1.538938 | 0.686782 |
| ALDH2    | 1.076643 | 0.899294 | 1.288968 | 0.421318 |
| CDKN1B   | 1.081782 | 0.723082 | 1.618422 | 0.702118 |
| GPRC5D   | 1.14727  | 0.913826 | 1.44035  | 0.236571 |
| GSG1     | 0.369282 | 0.188165 | 0.724735 | 0.003781 |
| SCNN1A   | 2.724078 | 1.417601 | 5.234618 | 0.002637 |
| LTBR     | 1.347545 | 0.949059 | 1.913345 | 0.095385 |
| OGFOD2   | 0.745531 | 0.42111  | 1.319884 | 0.313632 |
| CDK2AP1  | 1.184479 | 0.748165 | 1.875242 | 0.470138 |
| OAS3     | 1.310549 | 1.087207 | 1.57977  | 0.004553 |
| OAS2     | 1.331279 | 1.121244 | 1.580658 | 0.00109  |
| ART4     | 0.841391 | 0.622597 | 1.137076 | 0.26104  |
| MGP      | 0.742756 | 0.518509 | 1.063987 | 0.10486  |
| RASAL1   | 1.040847 | 0.828732 | 1.307255 | 0.730609 |
| ARHGDI1  | 1.435097 | 0.914518 | 2.252008 | 0.116118 |
| GTF2H3   | 1.194282 | 0.742943 | 1.919811 | 0.463506 |
| EIF2B1   | 1.442986 | 0.789674 | 2.636795 | 0.233163 |
| DDX55    | 0.814234 | 0.478709 | 1.384929 | 0.448259 |
| SLC38A1  | 1.171476 | 1.012032 | 1.356041 | 0.03399  |
| VDR      | 1.317003 | 1.121718 | 1.546285 | 0.000772 |
| RFC5     | 1.514457 | 0.927444 | 2.473013 | 0.097133 |
| STX2     | 0.887157 | 0.684975 | 1.149017 | 0.364229 |
| COPZ1    | 1.787955 | 0.812141 | 3.936242 | 0.148973 |
| CAND1    | 0.897084 | 0.564325 | 1.426057 | 0.646067 |
| IFNG     | 1.116271 | 0.833985 | 1.494104 | 0.459616 |
| RAB5B    | 0.55752  | 0.367432 | 0.845947 | 0.006026 |
| MDM1     | 0.676414 | 0.463769 | 0.98656  | 0.042333 |
| NUP107   | 0.792349 | 0.52153  | 1.203799 | 0.275386 |
| CNOT2    | 0.711209 | 0.377262 | 1.340761 | 0.292121 |
| TIMELESS | 1.251445 | 0.895507 | 1.748857 | 0.188977 |
| CPSF6    | 0.666432 | 0.436522 | 1.017433 | 0.060121 |
| KRR1     | 0.781924 | 0.473889 | 1.290189 | 0.335659 |
| MRPL51   | 1.691433 | 0.949508 | 3.013082 | 0.074409 |
| GAPDH    | 1.153619 | 0.802175 | 1.659035 | 0.440776 |

|          |          |          |          |          |
|----------|----------|----------|----------|----------|
| NOP2     | 0.590529 | 0.370299 | 0.941737 | 0.026962 |
| CHD4     | 0.507254 | 0.276375 | 0.931005 | 0.028473 |
| ACRBP    | 1.374235 | 0.968468 | 1.950009 | 0.074992 |
| UHRF1BP1 | 1.068688 | 0.729877 | 1.564775 | 0.732756 |
| COPS7A   | 1.579511 | 0.970281 | 2.571272 | 0.065972 |
| ING4     | 0.878583 | 0.518678 | 1.488223 | 0.630238 |
| GNB3     | 0.84003  | 0.643002 | 1.097431 | 0.20117  |
| CDCA3    | 0.947683 | 0.696521 | 1.289412 | 0.732326 |
| CHPT1    | 0.763091 | 0.472198 | 1.233187 | 0.269564 |
| USP5     | 2.255929 | 1.373941 | 3.7041   | 0.001302 |
| TP11     | 1.975292 | 1.261916 | 3.091948 | 0.002906 |
| GNPTAB   | 0.922642 | 0.67911  | 1.253507 | 0.606605 |
| SPSB2    | 1.232499 | 0.832377 | 1.82496  | 0.296563 |
| ENO2     | 1.057108 | 0.874326 | 1.278101 | 0.566386 |
| ATN1     | 1.037235 | 0.853498 | 1.260527 | 0.71324  |
| PTPN6    | 1.661441 | 1.253441 | 2.202246 | 0.000414 |
| LPCAT3   | 2.385871 | 1.485296 | 3.832488 | 0.000323 |
| NT5DC3   | 1.077664 | 0.877817 | 1.323009 | 0.474787 |
| SUDS3    | 0.577969 | 0.300386 | 1.11206  | 0.100617 |
| GOLT1B   | 0.805944 | 0.474705 | 1.368312 | 0.424379 |
| LDHB     | 1.003768 | 0.751683 | 1.340391 | 0.979667 |
| PRKAB1   | 1.192483 | 0.735488 | 1.933431 | 0.475252 |
| CMAS     | 1.227961 | 0.811162 | 1.858924 | 0.331704 |
| HCFC2    | 1.017297 | 0.612453 | 1.689753 | 0.947187 |
| CLEC4A   | 1.057357 | 0.863992 | 1.293998 | 0.58834  |
| RAB35    | 1.542358 | 0.970583 | 2.45097  | 0.066711 |
| PHC1     | 0.98727  | 0.713335 | 1.366402 | 0.938412 |
| COX6A1   | 1.777999 | 1.065808 | 2.966088 | 0.027521 |
| RIC8B    | 0.809753 | 0.544552 | 1.204109 | 0.297209 |
| FGFR1OP2 | 0.896533 | 0.618938 | 1.298631 | 0.563446 |
| KLRB1    | 0.888    | 0.677128 | 1.164542 | 0.39049  |
| BTN3A3   | 1.000757 | 0.770675 | 1.299529 | 0.99547  |
| DSE      | 0.735967 | 0.578465 | 0.936353 | 0.012588 |
| RWDD1    | 1.211494 | 0.655382 | 2.239485 | 0.540516 |
| MAK      | 0.661837 | 0.480385 | 0.911828 | 0.011585 |
| TMEM14C  | 0.94623  | 0.597014 | 1.499716 | 0.814043 |
| PAK1IP1  | 1.00396  | 0.643657 | 1.56595  | 0.986097 |
| GCNT2    | 1.012688 | 0.817757 | 1.254086 | 0.90798  |
| NEDD9    | 1.343414 | 1.012066 | 1.783245 | 0.041056 |
| ASF1A    | 0.886221 | 0.618576 | 1.26967  | 0.510252 |
| MCM9     | 0.731978 | 0.394872 | 1.356876 | 0.321778 |
| RNGTT    | 1.238747 | 0.669311 | 2.292646 | 0.495459 |
| MAN1A1   | 0.904166 | 0.774446 | 1.055614 | 0.202311 |
| GABRR2   | 1.156428 | 0.90994  | 1.469686 | 0.234711 |
| SERINC1  | 1.100383 | 0.701753 | 1.725456 | 0.676829 |
| HDDC2    | 1.947213 | 1.175347 | 3.225973 | 0.009675 |
| HINT3    | 0.956738 | 0.586442 | 1.56085  | 0.859432 |
| NCOA7    | 0.94274  | 0.747992 | 1.188192 | 0.617469 |
| SASH1    | 1.25811  | 1.006938 | 1.571936 | 0.043299 |
| UST      | 1.51931  | 1.195839 | 1.93028  | 0.000617 |
| FBXO5    | 0.95073  | 0.631193 | 1.432029 | 0.808969 |
| MTRF1L   | 1.376312 | 0.732769 | 2.585034 | 0.320627 |
| PPARD    | 1.267748 | 0.995776 | 1.614001 | 0.054153 |
| FANCE    | 1.327641 | 0.873041 | 2.018955 | 0.185129 |
| SLC26A8  | 0.862613 | 0.677745 | 1.097907 | 0.229774 |
| MAPK14   | 0.859478 | 0.564608 | 1.308343 | 0.479977 |
| RHAG     | 0.976697 | 0.869158 | 1.097542 | 0.691982 |
| KCTD20   | 1.038912 | 0.666478 | 1.619464 | 0.866157 |

|          |          |          |          |          |
|----------|----------|----------|----------|----------|
| STK38    | 0.72915  | 0.494217 | 1.075763 | 0.111404 |
| SOD2     | 1.318906 | 1.030539 | 1.687965 | 0.027882 |
| MRPL18   | 2.328397 | 1.364331 | 3.973693 | 0.001941 |
| MCM3     | 1.356813 | 0.946277 | 1.945455 | 0.096989 |
| RNF8     | 1.813455 | 1.096262 | 2.999848 | 0.020458 |
| PHACTR1  | 1.335942 | 0.961    | 1.857171 | 0.084838 |
| MDGA1    | 0.974924 | 0.825852 | 1.150905 | 0.764215 |
| FBXO9    | 0.906123 | 0.557925 | 1.47163  | 0.690322 |
| CD83     | 1.149691 | 0.915497 | 1.443794 | 0.23003  |
| MDN1     | 0.925868 | 0.66076  | 1.297342 | 0.654508 |
| BACH2    | 1.064316 | 0.85303  | 1.327936 | 0.580898 |
| TREML2   | 1.789009 | 1.420717 | 2.252773 | 7.58E-07 |
| ZNF451   | 0.673981 | 0.418215 | 1.086166 | 0.105127 |
| BAG2     | 1.110358 | 0.844222 | 1.460392 | 0.454007 |
| RAB23    | 1.046616 | 0.706182 | 1.551166 | 0.820446 |
| KHDRBS2  | 1.271275 | 1.003089 | 1.611163 | 0.047091 |
| FBXL4    | 0.624343 | 0.402353 | 0.96881  | 0.035613 |
| CCNC     | 0.742677 | 0.468485 | 1.177344 | 0.205698 |
| E2F3     | 0.803951 | 0.470606 | 1.373415 | 0.424487 |
| PTP4A1   | 0.393956 | 0.130547 | 1.188852 | 0.098332 |
| ASCC3    | 0.977872 | 0.642242 | 1.4889   | 0.916916 |
| BVES     | 1.753438 | 1.343619 | 2.288256 | 3.56E-05 |
| MED23    | 0.734633 | 0.435352 | 1.239653 | 0.248006 |
| WASF1    | 0.905915 | 0.784068 | 1.046697 | 0.180017 |
| GPLD1    | 0.910247 | 0.643718 | 1.287131 | 0.594727 |
| ALDH5A1  | 0.939688 | 0.735556 | 1.200471 | 0.618618 |
| VNN1     | 1.196333 | 1.080046 | 1.32514  | 0.000591 |
| VNN2     | 1.133525 | 1.012053 | 1.269578 | 0.030226 |
| SMAP1    | 1.244001 | 0.615122 | 2.515826 | 0.543442 |
| RPS12    | 1.313928 | 0.896409 | 1.925914 | 0.161685 |
| B3GAT2   | 0.43277  | 0.199495 | 0.938822 | 0.034028 |
| GMNN     | 1.293945 | 0.865861 | 1.933675 | 0.208661 |
| SOBP     | 1.523218 | 0.982882 | 2.360603 | 0.059739 |
| SNX3     | 1.204669 | 0.60203  | 2.410556 | 0.598795 |
| HBS1L    | 0.842305 | 0.498206 | 1.424066 | 0.521835 |
| TRIM38   | 1.370096 | 0.911137 | 2.060242 | 0.130319 |
| PEX7     | 1.688618 | 0.865423 | 3.294843 | 0.124498 |
| ZBTB24   | 1.160288 | 0.69351  | 1.941237 | 0.571278 |
| FIG4     | 0.922075 | 0.52303  | 1.62557  | 0.779135 |
| PERP     | 1.362479 | 0.66859  | 2.776513 | 0.39445  |
| SLC16A10 | 0.909187 | 0.634855 | 1.302064 | 0.603382 |
| HECA     | 1.3044   | 0.907229 | 1.875447 | 0.15145  |
| PHACTR2  | 1.010558 | 0.723327 | 1.411848 | 0.950915 |
| EPM2A    | 0.707855 | 0.416872 | 1.20195  | 0.200885 |
| SLC39A7  | 0.992219 | 0.618372 | 1.592081 | 0.974171 |
| PHF1     | 1.027418 | 0.710131 | 1.486469 | 0.88587  |
| CUTA     | 1.455362 | 0.929223 | 2.279408 | 0.101153 |
| QKI      | 1.058794 | 0.734117 | 1.527065 | 0.759789 |
| MDFI     | 0.883215 | 0.783787 | 0.995255 | 0.041548 |
| TFEB     | 1.54307  | 1.260454 | 1.889053 | 2.64E-05 |
| CCND3    | 1.876008 | 1.40272  | 2.508987 | 2.22E-05 |
| BYSL     | 1.566506 | 1.002253 | 2.448426 | 0.048857 |
| FAM120B  | 0.976203 | 0.608264 | 1.566708 | 0.920514 |
| TBP      | 0.720838 | 0.366225 | 1.418822 | 0.343414 |
| GUCA1B   | 0.926985 | 0.654613 | 1.312686 | 0.669275 |
| PRPH2    | 1.033725 | 0.68024  | 1.570898 | 0.876546 |
| PPP2R5D  | 1.267694 | 0.696345 | 2.307834 | 0.437755 |
| MRPL2    | 1.306458 | 0.732563 | 2.329949 | 0.365126 |

|         |          |          |          |          |
|---------|----------|----------|----------|----------|
| PTK7    | 0.904976 | 0.766281 | 1.068774 | 0.239456 |
| SRF     | 1.491977 | 0.943186 | 2.360082 | 0.08727  |
| CUL9    | 0.914762 | 0.614205 | 1.362394 | 0.661121 |
| DUSP22  | 1.033083 | 0.71632  | 1.489923 | 0.861698 |
| EXOC2   | 0.839463 | 0.527353 | 1.336291 | 0.460657 |
| COX7A2  | 1.685512 | 0.994105 | 2.8578   | 0.052621 |
| TMEM30A | 0.94941  | 0.643505 | 1.400732 | 0.793605 |
| GMDS    | 1.284775 | 0.809999 | 2.037837 | 0.287029 |
| SENP6   | 0.745772 | 0.423442 | 1.313463 | 0.309741 |
| VEGFA   | 0.869644 | 0.728886 | 1.037584 | 0.121043 |
| PRPF4B  | 0.604452 | 0.372    | 0.982156 | 0.042087 |
| TTK     | 0.940944 | 0.704251 | 1.257186 | 0.680515 |
| SLC29A1 | 1.226265 | 0.861767 | 1.744935 | 0.25707  |
| BTN2A1  | 0.945159 | 0.597504 | 1.495094 | 0.809512 |
| LAMA4   | 0.872566 | 0.568337 | 1.33965  | 0.533162 |
| CLIC5   | 1.214568 | 0.586592 | 2.514823 | 0.600643 |
| LY86    | 1.12544  | 1.006247 | 1.258753 | 0.038547 |
| HARS2   | 0.962999 | 0.611895 | 1.515566 | 0.870558 |
| NUDT12  | 1.109164 | 0.855747 | 1.437627 | 0.433705 |
| CEP72   | 1.096421 | 0.692696 | 1.73545  | 0.694406 |
| MAN2A1  | 0.878131 | 0.58225  | 1.32437  | 0.535322 |
| HMGCS1  | 1.310321 | 0.909349 | 1.888099 | 0.147027 |
| DAP     | 1.08496  | 0.735561 | 1.600327 | 0.680921 |
| BRD8    | 0.809114 | 0.547976 | 1.194696 | 0.286745 |
| KIF20A  | 0.829734 | 0.658284 | 1.045837 | 0.113999 |
| NNT     | 1.023095 | 0.669628 | 1.563141 | 0.915918 |
| MRPS30  | 0.831578 | 0.521988 | 1.324785 | 0.43761  |
| HSPA9   | 0.921225 | 0.631875 | 1.343076 | 0.669703 |
| MRPS27  | 0.960865 | 0.643024 | 1.435814 | 0.845547 |
| PFDN1   | 1.442391 | 0.811661 | 2.563251 | 0.211795 |
| HBEGF   | 1.020529 | 0.893328 | 1.165842 | 0.764797 |
| LOX     | 0.94766  | 0.751664 | 1.19476  | 0.649291 |
| GZMK    | 1.007625 | 0.786399 | 1.291085 | 0.952111 |
| CDH9    | 0.909808 | 0.775214 | 1.067771 | 0.247198 |
| APBB3   | 0.976945 | 0.679551 | 1.40449  | 0.89978  |
| TMCO6   | 0.880641 | 0.52698  | 1.471648 | 0.627566 |
| SPARC   | 0.92724  | 0.832197 | 1.033138 | 0.170962 |
| IK      | 1.123497 | 0.649672 | 1.942897 | 0.676911 |
| HMGCR   | 1.107031 | 0.710148 | 1.725719 | 0.653509 |
| FAF2    | 1.224863 | 0.670479 | 2.237637 | 0.509438 |
| PDE8B   | 0.589385 | 0.300376 | 1.156467 | 0.124229 |
| CLK4    | 0.932809 | 0.604644 | 1.439082 | 0.753192 |
| HAVCR1  | 1.190956 | 0.848589 | 1.671454 | 0.312226 |
| ITK     | 1.008585 | 0.810873 | 1.254505 | 0.938791 |
| RNF130  | 0.621433 | 0.398088 | 0.970084 | 0.036293 |
| THG1L   | 1.121725 | 0.719249 | 1.749418 | 0.612442 |
| ARSB    | 0.857379 | 0.575804 | 1.276647 | 0.44872  |
| CLINT1  | 0.487919 | 0.318366 | 0.747771 | 0.000987 |
| THBS4   | 0.800558 | 0.603814 | 1.061409 | 0.12215  |
| CNOT6   | 0.694497 | 0.445764 | 1.082023 | 0.107071 |
| BTNL8   | 0.766584 | 0.478433 | 1.228283 | 0.269113 |
| TTC1    | 1.547813 | 0.807109 | 2.96828  | 0.188537 |
| MSH3    | 0.807202 | 0.541837 | 1.202529 | 0.29228  |
| RASGRF2 | 0.724708 | 0.486755 | 1.078986 | 0.11283  |
| CCNG1   | 1.109942 | 0.83152  | 1.481589 | 0.479024 |
| POLR3G  | 0.654907 | 0.470442 | 0.911701 | 0.012154 |
| LMNB1   | 0.780795 | 0.551525 | 1.105374 | 0.162981 |
| ARRDC3  | 0.971209 | 0.775542 | 1.216242 | 0.799108 |

|          |          |          |          |          |
|----------|----------|----------|----------|----------|
| GOLPH3   | 1.137293 | 0.728425 | 1.775661 | 0.571415 |
| SUB1     | 0.794361 | 0.461803 | 1.366405 | 0.405471 |
| NPR3     | 1.027097 | 0.940275 | 1.121936 | 0.552958 |
| FAM172A  | 0.686139 | 0.414817 | 1.134928 | 0.14237  |
| SLC27A6  | 0.834674 | 0.65426  | 1.064837 | 0.145841 |
| LNPEP    | 0.775138 | 0.530865 | 1.131811 | 0.187217 |
| PDE4D    | 0.898916 | 0.671549 | 1.203263 | 0.473828 |
| RAD1     | 1.185185 | 0.585266 | 2.400046 | 0.636969 |
| BRIX1    | 0.962755 | 0.590099 | 1.57075  | 0.879207 |
| PRLR     | 1.068275 | 0.913074 | 1.249857 | 0.409606 |
| SLC12A7  | 1.208244 | 0.97377  | 1.499178 | 0.085706 |
| RAD50    | 0.742833 | 0.386936 | 1.426077 | 0.371659 |
| ST8SIA4  | 0.771087 | 0.562136 | 1.057706 | 0.10695  |
| GNPDA1   | 1.138213 | 0.917704 | 1.411707 | 0.238675 |
| PCDH12   | 1.449781 | 1.077403 | 1.950862 | 0.014199 |
| SKP1     | 0.78058  | 0.479813 | 1.269878 | 0.318425 |
| NUP155   | 1.011235 | 0.645162 | 1.58502  | 0.961141 |
| PPP2CA   | 0.922306 | 0.568396 | 1.496574 | 0.743304 |
| NR3C1    | 0.897296 | 0.598169 | 1.346007 | 0.600429 |
| PPWD1    | 0.748444 | 0.452502 | 1.237936 | 0.259066 |
| LIFR     | 0.80438  | 0.593726 | 1.089774 | 0.160004 |
| TRIM23   | 0.684155 | 0.438429 | 1.067604 | 0.094557 |
| SEC24A   | 0.645574 | 0.394135 | 1.057419 | 0.082175 |
| TXNDC15  | 0.740348 | 0.410956 | 1.333758 | 0.316819 |
| TTC33    | 0.903334 | 0.586324 | 1.391742 | 0.644794 |
| TCERG1   | 0.508137 | 0.304579 | 0.847737 | 0.009528 |
| DPYSL3   | 1.165776 | 1.006801 | 1.349852 | 0.040308 |
| SMAD5    | 0.73579  | 0.553753 | 0.977668 | 0.03437  |
| CSNK1A1  | 0.856171 | 0.508631 | 1.441179 | 0.558913 |
| ERGIC1   | 1.162768 | 0.835409 | 1.618404 | 0.371354 |
| PDGFRB   | 0.976628 | 0.793755 | 1.201633 | 0.823095 |
| ATP6V0E1 | 1.333496 | 0.82758  | 2.148688 | 0.237033 |
| BNIP1    | 0.903036 | 0.527856 | 1.544882 | 0.709672 |
| CPEB4    | 0.959037 | 0.700065 | 1.313811 | 0.794523 |
| HRH2     | 1.032026 | 0.897704 | 1.186446 | 0.657689 |
| DBN1     | 1.10434  | 0.912948 | 1.335855 | 0.306753 |
| ZNF346   | 1.099764 | 0.69432  | 1.741964 | 0.685291 |
| UNC5A    | 1.08263  | 0.91661  | 1.27872  | 0.349905 |
| EHHADH   | 1.11709  | 0.841854 | 1.482313 | 0.442964 |
| SMC4     | 1.234942 | 0.932581 | 1.635334 | 0.140802 |
| ACTR8    | 0.929429 | 0.602457 | 1.43386  | 0.740762 |
| TBCCD1   | 0.979213 | 0.568025 | 1.688056 | 0.939736 |
| CRBN     | 0.625626 | 0.40324  | 0.970657 | 0.036361 |
| BCL6     | 1.112327 | 0.964406 | 1.282936 | 0.143696 |
| HGD      | 1.436668 | 1.022382 | 2.018828 | 0.036844 |
| ARL6     | 0.769005 | 0.494496 | 1.195903 | 0.243668 |
| NPHP3    | 0.808702 | 0.450852 | 1.450586 | 0.476325 |
| CD86     | 1.143123 | 1.015471 | 1.286821 | 0.026823 |
| AMOTL2   | 0.983679 | 0.696659 | 1.388951 | 0.92552  |
| NIT2     | 0.832553 | 0.50199  | 1.380795 | 0.477732 |
| FAM162A  | 2.479064 | 1.367778 | 4.493244 | 0.00277  |
| OGG1     | 0.996822 | 0.746552 | 1.330993 | 0.982786 |
| KPNA1    | 0.799216 | 0.463569 | 1.377887 | 0.419961 |
| PCCB     | 0.852785 | 0.570803 | 1.274068 | 0.436889 |
| UBE3A    | 0.763208 | 0.457126 | 1.274236 | 0.301472 |
| ARMC8    | 0.845787 | 0.521329 | 1.372179 | 0.497518 |
| CEP70    | 0.958113 | 0.779251 | 1.17803  | 0.684841 |
| RBP2     | 0.816568 | 0.595    | 1.120646 | 0.209586 |



|          |          |          |          |          |
|----------|----------|----------|----------|----------|
| SLC25A36 | 0.646741 | 0.427716 | 0.977923 | 0.038849 |
| GRK7     | 1.200003 | 0.550131 | 2.617571 | 0.646819 |
| RNF7     | 1.50036  | 0.832106 | 2.705281 | 0.177375 |
| TFDP2    | 0.909229 | 0.703942 | 1.174384 | 0.466111 |
| XRN1     | 0.709707 | 0.489856 | 1.028227 | 0.069862 |
| KAT2B    | 1.131982 | 0.761139 | 1.683508 | 0.540424 |
| SERPINI2 | 1.285509 | 1.106375 | 1.493646 | 0.001037 |
| PDCD10   | 1.506025 | 0.852302 | 2.661158 | 0.158614 |
| PFKFB4   | 1.060338 | 0.853815 | 1.316816 | 0.596056 |
| COL7A1   | 1.282128 | 0.809835 | 2.029859 | 0.289066 |
| PRKAR2A  | 1.435967 | 0.883438 | 2.334064 | 0.144311 |
| HES1     | 1.162594 | 0.879837 | 1.536222 | 0.289335 |
| USP4     | 1.116491 | 0.698771 | 1.783921 | 0.644898 |
| ACAP2    | 0.874921 | 0.571284 | 1.339942 | 0.53894  |
| ECT2     | 0.839361 | 0.576504 | 1.222069 | 0.360907 |
| GNAT1    | 0.216696 | 0.010937 | 4.293573 | 0.315545 |
| GNAI2    | 1.545705 | 1.066788 | 2.239625 | 0.021353 |
| TFG      | 0.799523 | 0.420159 | 1.521419 | 0.4955   |
| USP9Y    | 1.013268 | 0.907958 | 1.130792 | 0.813888 |
| HYAL1    | 0.888737 | 0.593388 | 1.33109  | 0.567112 |
| TUSC2    | 1.114629 | 0.637107 | 1.95006  | 0.703747 |
| RPL24    | 0.909688 | 0.544986 | 1.518448 | 0.71728  |
| CYB561D2 | 1.359732 | 0.88487  | 2.089426 | 0.160935 |
| FXR1     | 0.503926 | 0.313425 | 0.810214 | 0.004675 |
| CBLB     | 0.966498 | 0.561424 | 1.663838 | 0.902145 |
| BBX      | 1.127916 | 0.818496 | 1.554306 | 0.461884 |
| IFT57    | 1.640215 | 1.116964 | 2.408588 | 0.011595 |
| GNB4     | 0.74102  | 0.458523 | 1.197563 | 0.221018 |
| HHLA2    | 1.210593 | 0.959162 | 1.527933 | 0.107631 |
| IQCG     | 1.461296 | 0.965878 | 2.210823 | 0.072555 |
| GBE1     | 0.788647 | 0.518937 | 1.198533 | 0.266183 |
| UMPS     | 1.323829 | 0.822423 | 2.130927 | 0.248079 |
| NCBP2    | 0.70118  | 0.407525 | 1.206437 | 0.199794 |
| SNX4     | 0.826161 | 0.486949 | 1.40167  | 0.478927 |
| FRMD4B   | 1.060885 | 0.854269 | 1.317474 | 0.5928   |
| SLC41A3  | 0.94083  | 0.600547 | 1.473925 | 0.790016 |
| PLXNA1   | 1.30595  | 1.05559  | 1.615688 | 0.013965 |
| ATP6V1A  | 1.439385 | 1.005573 | 2.060346 | 0.046554 |
| ABTB1    | 1.142116 | 0.870331 | 1.498772 | 0.337886 |
| PODXL2   | 1.136423 | 0.99336  | 1.300089 | 0.062474 |
| UPK1B    | 1.440211 | 0.947591 | 2.188926 | 0.08765  |
| CSPG5    | 0.646653 | 0.341659 | 1.223909 | 0.180488 |
| KLHL18   | 1.20026  | 0.763619 | 1.886573 | 0.428869 |
| SCAP     | 1.074911 | 0.712581 | 1.621475 | 0.730544 |
| NEK11    | 1.198315 | 0.795721 | 1.804601 | 0.386451 |
| MRPL3    | 0.994618 | 0.628222 | 1.574707 | 0.981634 |
| PLSCR4   | 1.038399 | 0.876015 | 1.230885 | 0.664079 |
| HEMK1    | 0.804881 | 0.531089 | 1.219819 | 0.306187 |
| CISH     | 1.122569 | 0.904536 | 1.393158 | 0.294015 |
| MAPKAPK  | 1.231638 | 0.757798 | 2.001766 | 0.400476 |
| ACVR2B   | 0.877348 | 0.674719 | 1.14083  | 0.328763 |
| WDR48    | 0.60191  | 0.386545 | 0.937266 | 0.024659 |
| COMMD2   | 1.235428 | 0.778974 | 1.95935  | 0.368933 |
| GORASP1  | 0.753899 | 0.451846 | 1.257868 | 0.279433 |
| RRP9     | 1.538671 | 0.993351 | 2.383355 | 0.053596 |
| ABCC5    | 0.909748 | 0.635584 | 1.302174 | 0.605193 |
| ABHD14B  | 1.596944 | 1.01249  | 2.51877  | 0.044078 |
| EIF1B    | 1.31728  | 0.868885 | 1.997073 | 0.194295 |

|         |          |          |          |          |
|---------|----------|----------|----------|----------|
| KLHL24  | 0.636574 | 0.442878 | 0.914985 | 0.01469  |
| PLCH1   | 0.818835 | 0.680735 | 0.98495  | 0.033933 |
| VIPR1   | 1.196554 | 0.968906 | 1.477688 | 0.095595 |
| DNAH1   | 1.017546 | 0.745592 | 1.388696 | 0.912702 |
| SSR3    | 1.269236 | 0.760811 | 2.117425 | 0.361216 |
| ZBTB47  | 1.458828 | 1.055218 | 2.016816 | 0.022301 |
| NKTR    | 0.604548 | 0.417651 | 0.875079 | 0.00765  |
| CLCN2   | 0.988109 | 0.654572 | 1.4916   | 0.9546   |
| FOXP1   | 0.737822 | 0.483275 | 1.126443 | 0.159004 |
| EIF4G1  | 1.39204  | 0.871298 | 2.224009 | 0.166465 |
| SPCS1   | 1.553387 | 0.89674  | 2.690871 | 0.116144 |
| NEK4    | 0.793041 | 0.512542 | 1.227049 | 0.297782 |
| SLC4A3  | 1.206742 | 0.99428  | 1.464604 | 0.057183 |
| INO80D  | 0.503121 | 0.319095 | 0.793279 | 0.003109 |
| EEF1B2  | 0.983148 | 0.713658 | 1.354404 | 0.917186 |
| ADAM23  | 0.960404 | 0.579043 | 1.59293  | 0.875638 |
| DGUOK   | 2.450117 | 0.931776 | 6.442615 | 0.069261 |
| LMAN2L  | 0.801526 | 0.467931 | 1.372945 | 0.420422 |
| RTKN    | 0.841259 | 0.67508  | 1.048345 | 0.123687 |
| TTL     | 1.209873 | 0.73009  | 2.00495  | 0.459748 |
| IL1A    | 1.101878 | 0.701396 | 1.731025 | 0.673784 |
| CCL20   | 0.688439 | 0.325302 | 1.456948 | 0.329044 |
| PIKFYVE | 0.564047 | 0.377915 | 0.841854 | 0.005071 |
| FAHD2A  | 0.995108 | 0.625686 | 1.582647 | 0.983473 |
| NCL     | 1.111061 | 0.743324 | 1.660726 | 0.607568 |
| ACTR1B  | 2.019536 | 1.245726 | 3.274014 | 0.004354 |
| SLC35F5 | 0.401028 | 0.25314  | 0.635314 | 9.92E-05 |
| ZAP70   | 0.995273 | 0.846428 | 1.170293 | 0.954286 |
| ACTR3   | 1.271147 | 0.783676 | 2.06184  | 0.33095  |
| STEAP3  | 0.932035 | 0.750132 | 1.158048 | 0.525187 |
| EPB41L5 | 0.984795 | 0.73726  | 1.31544  | 0.917382 |
| TFCP2L1 | 1.162479 | 0.878793 | 1.537744 | 0.291533 |
| TP53I3  | 1.266563 | 0.891486 | 1.799447 | 0.18721  |
| DNAJC27 | 0.789068 | 0.462798 | 1.345356 | 0.384175 |
| POMC    | 1.028454 | 0.882362 | 1.198734 | 0.719653 |
| STAM2   | 0.735222 | 0.435839 | 1.240254 | 0.248951 |
| OTOF    | 1.616565 | 1.08618  | 2.40594  | 0.017912 |
| GPD2    | 1.042429 | 0.73596  | 1.476518 | 0.815028 |
| CENPA   | 0.782148 | 0.587383 | 1.041495 | 0.092627 |
| CYTIP   | 1.270199 | 1.03256  | 1.562529 | 0.023627 |
| ACVR1   | 1.367483 | 0.985849 | 1.896853 | 0.060848 |
| TANC1   | 0.953757 | 0.801061 | 1.13556  | 0.594815 |
| SLC30A3 | 0.328451 | 0.109221 | 0.987725 | 0.047485 |
| MPV17   | 1.189431 | 0.611673 | 2.312911 | 0.609168 |
| GTF3C2  | 1.083539 | 0.52487  | 2.23685  | 0.828248 |
| EIF2B4  | 1.267327 | 0.65266  | 2.460881 | 0.484107 |
| NRBP1   | 0.914449 | 0.551878 | 1.515222 | 0.728513 |
| ITGA4   | 0.606979 | 0.446449 | 0.825232 | 0.001444 |
| PSMD14  | 1.546195 | 0.898296 | 2.661393 | 0.115751 |
| SNX17   | 1.862673 | 1.056902 | 3.282755 | 0.031446 |
| ASB3    | 0.638519 | 0.339802 | 1.199838 | 0.163353 |
| PPM1G   | 2.016478 | 1.107297 | 3.672169 | 0.021835 |
| REEP6   | 0.972117 | 0.778061 | 1.214573 | 0.803426 |
| PCSK4   | 0.887375 | 0.717261 | 1.097835 | 0.271168 |
| APC2    | 0.915726 | 0.590789 | 1.41938  | 0.693787 |
| IFIH1   | 1.264703 | 0.909262 | 1.759091 | 0.163035 |
| RPS15   | 1.285598 | 0.944079 | 1.750661 | 0.110783 |
| GCA     | 1.047874 | 0.82564  | 1.329926 | 0.700591 |

|         |          |          |          |          |
|---------|----------|----------|----------|----------|
| INO80B  | 1.042468 | 0.628282 | 1.729702 | 0.872103 |
| MOGS    | 0.939217 | 0.603909 | 1.460697 | 0.780775 |
| TTC31   | 1.337046 | 0.756    | 2.364673 | 0.318058 |
| NDUFS7  | 1.204425 | 0.692569 | 2.094579 | 0.510011 |
| PCGF1   | 1.339199 | 0.806514 | 2.22371  | 0.258958 |
| CLIP4   | 1.339461 | 1.12491  | 1.594933 | 0.001033 |
| SPTBN1  | 0.931328 | 0.724768 | 1.196758 | 0.578165 |
| AUP1    | 1.440085 | 0.888844 | 2.333194 | 0.138514 |
| RTN4    | 1.808435 | 0.976026 | 3.350768 | 0.059721 |
| HTRA2   | 1.238553 | 0.765751 | 2.00328  | 0.383177 |
| LOXL3   | 0.942089 | 0.740102 | 1.199201 | 0.628009 |
| DOK1    | 1.091187 | 0.764933 | 1.556594 | 0.630173 |
| GALNT3  | 0.778151 | 0.616089 | 0.982843 | 0.035273 |
| POLE4   | 1.653787 | 1.135198 | 2.409282 | 0.00878  |
| TACR1   | 0.725963 | 0.423158 | 1.245448 | 0.24486  |
| CCDC88A | 0.83453  | 0.565718 | 1.231074 | 0.36181  |
| MRPL19  | 0.891806 | 0.577292 | 1.377672 | 0.605824 |
| LANCL1  | 1.002438 | 0.708814 | 1.417695 | 0.989015 |
| WDR75   | 0.93785  | 0.563362 | 1.561276 | 0.805101 |
| EFEMP1  | 1.160245 | 0.874766 | 1.538891 | 0.302331 |
| FANCL   | 0.93953  | 0.62479  | 1.412821 | 0.764429 |
| FN1     | 1.119766 | 0.943319 | 1.329216 | 0.196012 |
| STAT1   | 1.089742 | 0.823008 | 1.442922 | 0.5485   |
| GLS     | 0.764543 | 0.524494 | 1.114459 | 0.162612 |
| PAPOLG  | 0.718769 | 0.466819 | 1.106702 | 0.133729 |
| PECR    | 1.090935 | 0.876539 | 1.357771 | 0.43562  |
| UNC50   | 0.68244  | 0.348382 | 1.336821 | 0.265382 |
| IGFBP2  | 0.94636  | 0.853466 | 1.049365 | 0.295619 |
| ELMOD3  | 1.050318 | 0.692251 | 1.593597 | 0.817469 |
| IGFBP5  | 0.801767 | 0.673387 | 0.954622 | 0.01308  |
| USP34   | 0.693376 | 0.48678  | 0.987656 | 0.042481 |
| KCNJ13  | 0.691779 | 0.471807 | 1.01431  | 0.059134 |
| CCT4    | 0.9544   | 0.638973 | 1.425537 | 0.819652 |
| GGCX    | 0.649526 | 0.365081 | 1.155591 | 0.142105 |
| EHBP1   | 0.774196 | 0.522867 | 1.146332 | 0.201247 |
| TXNDC9  | 1.013753 | 0.598623 | 1.716766 | 0.959469 |
| COQ10B  | 1.263162 | 0.707705 | 2.254579 | 0.429326 |
| GNLY    | 1.062657 | 0.924439 | 1.221541 | 0.392651 |
| SF3B1   | 0.85732  | 0.583262 | 1.26015  | 0.433425 |
| ST3GAL5 | 0.962493 | 0.746654 | 1.240725 | 0.767937 |
| CHST10  | 0.937399 | 0.701566 | 1.25251  | 0.661954 |
| PDCL3   | 0.932693 | 0.579962 | 1.499955 | 0.773773 |
| HSPE1   | 1.171134 | 0.795954 | 1.723158 | 0.422703 |
| PLCD4   | 0.931977 | 0.536079 | 1.620246 | 0.802842 |
| ZNF142  | 1.289121 | 0.805836 | 2.062246 | 0.289408 |
| IL1R2   | 1.198935 | 1.082241 | 1.328212 | 0.000515 |
| IL1R1   | 1.060428 | 0.891492 | 1.261377 | 0.507534 |
| IL1RL1  | 0.853541 | 0.726774 | 1.002418 | 0.053543 |
| IL18R1  | 0.957936 | 0.787173 | 1.165744 | 0.667922 |
| IL18RAP | 1.037905 | 0.867742 | 1.241436 | 0.683846 |
| FHL2    | 1.232269 | 0.996777 | 1.523396 | 0.053591 |
| UXS1    | 0.823513 | 0.543152 | 1.248589 | 0.360489 |
| ABCB6   | 0.811297 | 0.502722 | 1.309278 | 0.391777 |
| STK16   | 1.899585 | 1.151482 | 3.133719 | 0.011997 |
| HDLBP   | 1.042776 | 0.695762 | 1.562862 | 0.839223 |
| PPP1R7  | 3.322565 | 1.764258 | 6.25727  | 0.000201 |
| PASK    | 0.947922 | 0.601463 | 1.493949 | 0.817756 |
| STK25   | 1.543017 | 0.984251 | 2.418997 | 0.058656 |

|          |          |          |          |          |
|----------|----------|----------|----------|----------|
| TPO      | 0.897281 | 0.687515 | 1.171048 | 0.425005 |
| PROC     | 1.060603 | 0.675071 | 1.666313 | 0.798522 |
| ID2      | 1.153397 | 0.983947 | 1.35203  | 0.07835  |
| TAF1B    | 0.932723 | 0.574613 | 1.514012 | 0.778098 |
| HPCAL1   | 1.487762 | 1.019634 | 2.170815 | 0.03932  |
| ODC1     | 1.146467 | 0.820314 | 1.602298 | 0.423546 |
| BIRC6    | 0.677295 | 0.46928  | 0.977516 | 0.037393 |
| NOL10    | 0.970868 | 0.552209 | 1.706933 | 0.918206 |
| PLEKHB2  | 1.205523 | 0.739096 | 1.966303 | 0.453978 |
| GORASP2  | 1.316206 | 0.6845   | 2.530896 | 0.410149 |
| STRN     | 0.900756 | 0.574491 | 1.412313 | 0.648757 |
| CEBPZ    | 1.027811 | 0.7035   | 1.501628 | 0.887228 |
| PRKD3    | 0.985387 | 0.805813 | 1.204978 | 0.885962 |
| QPCT     | 0.981609 | 0.856037 | 1.1256   | 0.790397 |
| RAB3GAP1 | 1.073261 | 0.674142 | 1.708675 | 0.765706 |
| SLC25A12 | 1.629378 | 0.967745 | 2.743358 | 0.066266 |
| DLX2     | 1.271311 | 0.510201 | 3.167831 | 0.606329 |
| LCT      | 1.43125  | 1.162033 | 1.762839 | 0.000745 |
| SDC1     | 0.950646 | 0.785879 | 1.149957 | 0.602239 |
| PLCL1    | 0.914608 | 0.713445 | 1.172491 | 0.481234 |
| SLC1A4   | 0.727917 | 0.537562 | 0.985677 | 0.04005  |
| SOS1     | 0.80133  | 0.548998 | 1.169641 | 0.251025 |
| KYNU     | 1.205114 | 1.014739 | 1.431205 | 0.033441 |
| WIPF1    | 1.095709 | 0.685846 | 1.750506 | 0.702183 |
| COX7A2L  | 0.355726 | 0.186555 | 0.678302 | 0.001697 |
| PNO1     | 1.199265 | 0.725447 | 1.982555 | 0.478639 |
| PLEK     | 1.154109 | 0.767795 | 1.734797 | 0.490655 |
| RND3     | 1.225556 | 0.870395 | 1.72564  | 0.244043 |
| ATF2     | 0.595214 | 0.338179 | 1.047611 | 0.072064 |
| THADA    | 0.654968 | 0.399519 | 1.073747 | 0.093378 |
| AAK1     | 0.780961 | 0.564861 | 1.079734 | 0.134701 |
| TRAK2    | 1.099791 | 0.819537 | 1.475881 | 0.526193 |
| TIA1     | 0.676992 | 0.464161 | 0.987413 | 0.042791 |
| PCYOX1   | 0.725475 | 0.504664 | 1.0429   | 0.083074 |
| KISS1R   | 0.83797  | 0.51684  | 1.358628 | 0.4734   |
| EPAS1    | 0.800618 | 0.645545 | 0.992942 | 0.042924 |
| ARID3A   | 0.96565  | 0.66727  | 1.397455 | 0.852953 |
| SUMO1    | 1.203172 | 0.666752 | 2.171156 | 0.539132 |
| GRIN3B   | 1.049213 | 0.716043 | 1.537403 | 0.805335 |
| NFE2L2   | 1.165573 | 0.659278 | 2.060679 | 0.5982   |
| MSH6     | 0.865879 | 0.558018 | 1.343588 | 0.520593 |
| PLEKHA3  | 0.594552 | 0.340437 | 1.03835  | 0.067598 |
| SPR      | 1.032503 | 0.81314  | 1.311044 | 0.792946 |
| EPHA4    | 0.86012  | 0.571434 | 1.294648 | 0.470157 |
| PARD3B   | 0.971986 | 0.679766 | 1.389825 | 0.876239 |
| FARSB    | 1.20854  | 0.761345 | 1.918407 | 0.421735 |
| ALMS1    | 0.691058 | 0.489183 | 0.976241 | 0.036049 |
| BCL9     | 1.281034 | 1.047555 | 1.56655  | 0.015843 |
| DHCR24   | 1.098984 | 0.935664 | 1.290811 | 0.250205 |
| DNAJC16  | 0.821612 | 0.494398 | 1.36539  | 0.448334 |
| MORN1    | 0.828058 | 0.484267 | 1.415915 | 0.490615 |
| GPX7     | 1.13486  | 0.869756 | 1.480768 | 0.35135  |
| CACYBP   | 1.45655  | 0.831995 | 2.549939 | 0.188098 |
| SCP2     | 1.222664 | 0.76454  | 1.955304 | 0.401357 |
| TPSG1    | 1.058404 | 0.715838 | 1.564905 | 0.776039 |
| RALGPS2  | 0.887323 | 0.700788 | 1.123509 | 0.320802 |
| ANGPTL1  | 0.742401 | 0.576523 | 0.956007 | 0.020962 |
| FAM20B   | 0.814213 | 0.503576 | 1.316472 | 0.401812 |

|          |          |          |          |          |
|----------|----------|----------|----------|----------|
| TMEM59   | 1.35079  | 0.688239 | 2.651163 | 0.382123 |
| LRRRC42  | 1.926638 | 1.055224 | 3.517677 | 0.032764 |
| MRPL37   | 2.131066 | 1.225217 | 3.706641 | 0.00738  |
| ICMT     | 1.514057 | 0.912258 | 2.512852 | 0.108561 |
| RPL22    | 0.899301 | 0.640417 | 1.262837 | 0.540045 |
| CHD5     | 0.811549 | 0.644188 | 1.022389 | 0.076386 |
| QSOX1    | 1.037062 | 0.808239 | 1.330668 | 0.774788 |
| STXBP3   | 0.714258 | 0.438096 | 1.164505 | 0.177239 |
| PHF13    | 0.859401 | 0.632301 | 1.168068 | 0.333171 |
| ERRFI1   | 0.823896 | 0.565584 | 1.200182 | 0.312851 |
| PARK7    | 2.297428 | 1.279982 | 4.123631 | 0.005319 |
| AMPD2    | 0.994456 | 0.721511 | 1.370656 | 0.972909 |
| MECR     | 1.236397 | 0.727415 | 2.10152  | 0.433011 |
| KCNC4    | 0.885467 | 0.670963 | 1.168547 | 0.390096 |
| EDEM3    | 0.704533 | 0.491102 | 1.01072  | 0.057164 |
| WDR77    | 1.755588 | 0.92044  | 3.348493 | 0.087577 |
| RAP1A    | 1.374051 | 0.915743 | 2.06173  | 0.124827 |
| HDAC1    | 1.805467 | 1.01303  | 3.217781 | 0.045084 |
| CAPZA1   | 1.482097 | 0.92746  | 2.368417 | 0.099949 |
| S100PBP  | 0.812538 | 0.521959 | 1.264885 | 0.35792  |
| RNF19B   | 1.405562 | 0.996865 | 1.981816 | 0.052131 |
| SCAMP3   | 1.716693 | 1.028274 | 2.866001 | 0.038773 |
| TRIM62   | 1.303388 | 0.891729 | 1.905087 | 0.17124  |
| ASH1L    | 0.647067 | 0.44398  | 0.943051 | 0.023509 |
| DLGAP3   | 1.154611 | 0.933903 | 1.427479 | 0.184114 |
| SFPQ     | 0.701815 | 0.441237 | 1.116279 | 0.13481  |
| RHOA     | 1.064023 | 0.907374 | 1.247716 | 0.44503  |
| GON4L    | 1.038212 | 0.592898 | 1.817994 | 0.895621 |
| ARHGEF2  | 1.158848 | 0.674086 | 1.992223 | 0.593831 |
| MEF2D    | 1.330331 | 0.974058 | 1.816913 | 0.072702 |
| DOCK7    | 0.672629 | 0.477842 | 0.946818 | 0.023013 |
| SRM      | 1.587803 | 1.116707 | 2.257636 | 0.010034 |
| DLEU2L   | 0.684137 | 0.434068 | 1.078271 | 0.101983 |
| FBXO6    | 1.506885 | 1.079741 | 2.103005 | 0.015905 |
| MAD2L2   | 1.223155 | 0.858826 | 1.742038 | 0.264229 |
| DNAJC6   | 1.079162 | 0.910978 | 1.278397 | 0.378128 |
| LEPR     | 0.960474 | 0.76513  | 1.205692 | 0.72813  |
| IVNS1ABP | 1.075273 | 0.84367  | 1.370455 | 0.557603 |
| KIAA2013 | 1.413333 | 0.901386 | 2.216044 | 0.131672 |
| MFN2     | 1.278282 | 0.764926 | 2.13616  | 0.348697 |
| PRG4     | 0.893493 | 0.5356   | 1.490534 | 0.66624  |
| MIIP     | 1.315863 | 0.917635 | 1.886912 | 0.135549 |
| SMG7     | 1.106613 | 0.62597  | 1.956313 | 0.727475 |
| NCF2     | 1.203676 | 1.058867 | 1.368289 | 0.004589 |
| PDC      | 1.212978 | 0.807061 | 1.823053 | 0.35299  |
| SLC35D1  | 0.757634 | 0.492091 | 1.166469 | 0.20745  |
| PLA2G4A  | 1.578436 | 1.27946  | 1.947273 | 2.04E-05 |
| GADD45A  | 1.618904 | 1.152104 | 2.274837 | 0.005507 |
| PRDM2    | 1.026299 | 0.716172 | 1.470723 | 0.887544 |
| RGS2     | 1.074587 | 0.949176 | 1.216568 | 0.255893 |
| UCHL5    | 1.142684 | 0.703656 | 1.855632 | 0.589763 |
| BCAS2    | 1.582065 | 0.936465 | 2.672742 | 0.086417 |
| CTH      | 0.616585 | 0.464727 | 0.818067 | 0.000802 |
| AGMAT    | 1.295629 | 0.897021 | 1.871367 | 0.167389 |
| OLFML3   | 0.964661 | 0.797698 | 1.166571 | 0.710603 |
| PLEKHM2  | 1.787214 | 1.21089  | 2.637838 | 0.003463 |
| CRYZ     | 0.959    | 0.685714 | 1.341201 | 0.806751 |
| PHTF1    | 1.069403 | 0.678275 | 1.686076 | 0.772695 |

|         |          |          |          |          |
|---------|----------|----------|----------|----------|
| ZBTB17  | 1.136801 | 0.799455 | 1.616497 | 0.475326 |
| CD58    | 0.637343 | 0.462823 | 0.877669 | 0.005793 |
| TFAP2E  | 0.9934   | 0.726354 | 1.358627 | 0.966936 |
| CD2     | 1.134369 | 0.936724 | 1.373717 | 0.196791 |
| TTF2    | 0.982607 | 0.646885 | 1.492561 | 0.934435 |
| NR5A2   | 1.071492 | 0.791874 | 1.449845 | 0.654483 |
| KIF21B  | 1.405026 | 1.07912  | 1.829361 | 0.011554 |
| TMEM9   | 1.176472 | 0.884093 | 1.565544 | 0.264906 |
| MAP7D1  | 1.765835 | 1.192108 | 2.61568  | 0.00456  |
| WARS2   | 0.979574 | 0.597942 | 1.60478  | 0.934692 |
| OSCP1   | 0.946948 | 0.759687 | 1.180368 | 0.627752 |
| MRPS15  | 1.474321 | 0.835636 | 2.60116  | 0.180214 |
| EXOC8   | 1.647966 | 1.021816 | 2.657811 | 0.040515 |
| GNPAT   | 1.102075 | 0.638911 | 1.901    | 0.726774 |
| TSNAX   | 1.11075  | 0.715971 | 1.723205 | 0.639226 |
| RRAGC   | 1.599356 | 0.840085 | 3.044859 | 0.152855 |
| NID1    | 0.990569 | 0.887872 | 1.105144 | 0.865255 |
| LGALS8  | 1.43066  | 0.819225 | 2.498445 | 0.20803  |
| NT5C1A  | 1.547319 | 0.141526 | 16.91701 | 0.72056  |
| HPCAL4  | 0.84868  | 0.495832 | 1.452626 | 0.549612 |
| MTR     | 0.931529 | 0.63598  | 1.364423 | 0.715676 |
| BMP8B   | 1.445747 | 1.07997  | 1.935411 | 0.013253 |
| SIPA1L2 | 1.042246 | 0.885725 | 1.226427 | 0.618219 |
| RLF     | 0.784837 | 0.499675 | 1.232739 | 0.29294  |
| KMO     | 1.495085 | 1.096754 | 2.038085 | 0.010953 |
| ZNF684  | 1.173456 | 0.672819 | 2.046609 | 0.573014 |
| KCNQ4   | 0.955529 | 0.563244 | 1.621031 | 0.866045 |
| RIMS3   | 1.332874 | 0.993043 | 1.788999 | 0.055687 |
| AKT3    | 1.199744 | 1.003789 | 1.433952 | 0.045336 |
| ETV3    | 0.992453 | 0.597376 | 1.648814 | 0.976665 |
| ACADM   | 1.131812 | 0.729602 | 1.75575  | 0.58046  |
| SLAMF1  | 1.303559 | 1.005439 | 1.690074 | 0.045403 |
| CD48    | 1.036252 | 0.866288 | 1.239562 | 0.696839 |
| PADI2   | 1.010765 | 0.8852   | 1.154141 | 0.874294 |
| SDHB    | 2.484819 | 1.514236 | 4.077518 | 0.000316 |
| MFAP2   | 1.338463 | 1.021031 | 1.754583 | 0.034802 |
| RPF1    | 2.108843 | 1.086434 | 4.093406 | 0.027458 |
| KDM5B   | 0.61919  | 0.480206 | 0.798399 | 0.000219 |
| UAP1    | 0.997095 | 0.752029 | 1.322022 | 0.983871 |
| CTBS    | 0.83386  | 0.559449 | 1.24287  | 0.372264 |
| KLHL12  | 1.690074 | 1.021535 | 2.796135 | 0.041061 |
| SSX2IP  | 1.004603 | 0.715896 | 1.40974  | 0.978805 |
| ZNHIT6  | 1.058379 | 0.682584 | 1.641067 | 0.799851 |
| PLA2G2D | 1.415292 | 0.931637 | 2.150035 | 0.103515 |
| RBBP5   | 0.95298  | 0.586171 | 1.549328 | 0.845993 |
| GBP3    | 1.21079  | 0.906324 | 1.617538 | 0.195541 |
| GBP1    | 1.122308 | 0.962577 | 1.308546 | 0.140738 |
| KIF17   | 1.081886 | 0.930846 | 1.257435 | 0.304943 |
| GPR89A  | 0.645981 | 0.34921  | 1.194957 | 0.163793 |
| CD160   | 0.677283 | 0.470681 | 0.974573 | 0.035845 |
| ECE1    | 1.316261 | 1.087437 | 1.593235 | 0.004799 |
| HMGCL   | 0.959659 | 0.65363  | 1.408971 | 0.83355  |
| GALE    | 1.543678 | 0.972286 | 2.450863 | 0.06565  |
| ID3     | 1.085562 | 0.840811 | 1.401558 | 0.528816 |
| CR2     | 1.003925 | 0.74419  | 1.354311 | 0.979542 |
| CD46    | 0.955391 | 0.611728 | 1.492121 | 0.840997 |
| PRPF3   | 0.90045  | 0.474491 | 1.708799 | 0.748359 |
| APH1A   | 1.993896 | 1.143889 | 3.475531 | 0.014927 |

|          |          |          |          |          |
|----------|----------|----------|----------|----------|
| SLC2A1   | 0.969464 | 0.765287 | 1.228113 | 0.797163 |
| EBNA1BP2 | 1.403785 | 0.905556 | 2.176135 | 0.129413 |
| CDC20    | 0.974631 | 0.770995 | 1.232052 | 0.829857 |
| MPL      | 0.991706 | 0.866584 | 1.134894 | 0.903663 |
| ARTN     | 1.004457 | 0.865044 | 1.166634 | 0.953479 |
| IPO13    | 1.8699   | 1.19919  | 2.91574  | 0.005756 |
| ATP6V0B  | 1.060836 | 0.759202 | 1.482308 | 0.729349 |
| B4GALT2  | 0.840462 | 0.659768 | 1.070644 | 0.159348 |
| ERI3     | 1.359715 | 0.800663 | 2.309118 | 0.255456 |
| PTCH2    | 1.281599 | 0.890254 | 1.844973 | 0.181996 |
| AKR1A1   | 1.375837 | 0.880946 | 2.148745 | 0.160708 |
| PRDX1    | 1.359324 | 1.022539 | 1.807032 | 0.034566 |
| PIK3R3   | 1.013529 | 0.774209 | 1.326828 | 0.922102 |
| BLZF1    | 0.689337 | 0.452382 | 1.050408 | 0.08343  |
| SLC19A2  | 0.851534 | 0.62471  | 1.160715 | 0.309185 |
| FAAH     | 1.201684 | 0.965023 | 1.496384 | 0.100631 |
| NSUN4    | 1.343657 | 0.780011 | 2.314601 | 0.287067 |
| TMED5    | 0.855442 | 0.540541 | 1.353794 | 0.504997 |
| DR1      | 1.405512 | 0.841291 | 2.348133 | 0.193607 |
| CNN3     | 1.02623  | 0.855787 | 1.230619 | 0.779935 |
| F3       | 0.894071 | 0.777135 | 1.028602 | 0.117433 |
| ABCD3    | 1.056024 | 0.691396 | 1.61295  | 0.800851 |
| VAMP4    | 0.698035 | 0.446997 | 1.090058 | 0.113929 |
| DPH5     | 0.767319 | 0.500125 | 1.177261 | 0.225232 |
| FASLG    | 1.074372 | 0.806953 | 1.430411 | 0.62327  |
| PTBP2    | 0.537475 | 0.325318 | 0.887992 | 0.015364 |
| TNFSF4   | 1.196193 | 0.986706 | 1.450156 | 0.068194 |
| PRDX6    | 1.446956 | 0.766569 | 2.73124  | 0.254353 |
| DARS2    | 1.031114 | 0.635364 | 1.673365 | 0.901296 |
| IRF6     | 0.882433 | 0.783177 | 0.994268 | 0.039938 |
| RCAN3    | 0.969934 | 0.718205 | 1.309895 | 0.842165 |
| SYF2     | 1.239724 | 0.714642 | 2.150611 | 0.444526 |
| SLC35A3  | 0.422248 | 0.24722  | 0.721195 | 0.001596 |
| RCOR3    | 0.442313 | 0.252808 | 0.773871 | 0.004261 |
| STMN1    | 0.769527 | 0.587722 | 1.007572 | 0.056766 |
| MAN1C1   | 1.268576 | 0.961291 | 1.674087 | 0.092762 |
| NEK2     | 0.981619 | 0.749271 | 1.286018 | 0.892913 |
| RPS6KA1  | 1.920265 | 1.310662 | 2.813401 | 0.000813 |
| DHDDS    | 1.118469 | 0.593473 | 2.107887 | 0.729141 |
| NENF     | 1.586513 | 1.037222 | 2.426696 | 0.033295 |
| NSL1     | 0.779468 | 0.415386 | 1.462664 | 0.437847 |
| ARID1A   | 0.984819 | 0.549324 | 1.765567 | 0.959039 |
| CENPF    | 0.847462 | 0.678148 | 1.059049 | 0.145544 |
| RPA2     | 2.161095 | 1.165691 | 4.006492 | 0.014415 |
| PPP1R8   | 1.29057  | 0.75067  | 2.218779 | 0.356192 |
| STX12    | 1.396485 | 0.939952 | 2.074757 | 0.098255 |
| SLC5A9   | 1.205463 | 0.863579 | 1.682697 | 0.272171 |
| OSBPL9   | 0.811992 | 0.480944 | 1.37091  | 0.435756 |
| TXNDC12  | 0.918094 | 0.514592 | 1.63799  | 0.772342 |
| RCN2     | 0.674037 | 0.437386 | 1.038729 | 0.073815 |
| MUC5B    | 0.43659  | 0.222927 | 0.855036 | 0.015665 |
| CTSD     | 1.352244 | 1.12285  | 1.628501 | 0.001465 |
| STAG1    | 0.681655 | 0.448041 | 1.03708  | 0.073468 |
| STK11    | 1.245819 | 0.819989 | 1.892788 | 0.30303  |
| MMP8     | 1.037786 | 0.947929 | 1.136161 | 0.422161 |
| APOA1    | 1.259935 | 0.768194 | 2.066454 | 0.36003  |
| KPTN     | 1.246416 | 0.88388  | 1.757651 | 0.209084 |
| RPS25    | 1.052449 | 0.711911 | 1.555884 | 0.797719 |

|          |          |          |          |          |
|----------|----------|----------|----------|----------|
| KIF14    | 0.908605 | 0.68848  | 1.19911  | 0.498325 |
| DDX59    | 0.748107 | 0.42369  | 1.320925 | 0.317091 |
| ATF6     | 1.032846 | 0.624045 | 1.709445 | 0.899957 |
| CRYGD    | 1.152338 | 1.006673 | 1.319081 | 0.039742 |
| MREG     | 1.07524  | 0.878776 | 1.315627 | 0.481007 |
| FASTKD2  | 1.036792 | 0.640851 | 1.677361 | 0.882974 |
| NRP2     | 1.149893 | 0.802649 | 1.647363 | 0.446389 |
| CREB1    | 0.587365 | 0.348865 | 0.988913 | 0.045295 |
| KLF7     | 0.984084 | 0.710588 | 1.362844 | 0.923064 |
| B4GALT6  | 1.01018  | 0.870624 | 1.172106 | 0.893782 |
| CA14     | 1.688849 | 1.066985 | 2.67315  | 0.025306 |
| SPCS2    | 0.68047  | 0.349423 | 1.325152 | 0.2576   |
| USP35    | 0.836085 | 0.611187 | 1.143739 | 0.262774 |
| CASP8AP2 | 0.915242 | 0.635113 | 1.318926 | 0.634727 |
| HMG3     | 1.026794 | 0.679138 | 1.552418 | 0.900231 |
| ANKRD13C | 0.961944 | 0.559392 | 1.654181 | 0.888441 |
| PHF3     | 0.73897  | 0.463811 | 1.177371 | 0.20306  |
| PLAGL1   | 0.811249 | 0.623807 | 1.055015 | 0.118653 |
| FBXO30   | 0.719491 | 0.460249 | 1.124755 | 0.148678 |
| TNFAIP3  | 1.054367 | 0.827652 | 1.343185 | 0.668226 |
| AKAP7    | 1.34315  | 1.084944 | 1.662807 | 0.00676  |
| RAB32    | 0.929859 | 0.748233 | 1.155572 | 0.511903 |
| MYB      | 0.590362 | 0.450438 | 0.773753 | 0.000134 |
| ALDH8A1  | 1.122663 | 0.75231  | 1.675336 | 0.571057 |
| SGK1     | 1.078056 | 0.922427 | 1.259942 | 0.344729 |
| RNF146   | 0.668652 | 0.456394 | 0.979627 | 0.038866 |
| ARG1     | 0.878602 | 0.705614 | 1.093999 | 0.247314 |
| PMFBP1   | 0.879671 | 0.580912 | 1.33208  | 0.544799 |
| FBXL5    | 0.951865 | 0.689906 | 1.313291 | 0.763873 |
| MED28    | 0.578038 | 0.354694 | 0.942017 | 0.02783  |
| SLC16A7  | 0.780223 | 0.579929 | 1.049694 | 0.101097 |
| ZNF430   | 0.691695 | 0.417975 | 1.144666 | 0.151502 |
| VAMP8    | 1.267938 | 0.80852  | 1.988407 | 0.301095 |
| DCLRE1B  | 1.669854 | 1.026437 | 2.716592 | 0.038918 |
| FOXO3    | 0.841657 | 0.5484   | 1.291733 | 0.430272 |
| ARMC2    | 1.319888 | 0.80603  | 2.16134  | 0.270025 |
| GHRH     | 0.841607 | 0.509393 | 1.390483 | 0.500856 |
| RPN2     | 0.995803 | 0.689553 | 1.438066 | 0.982103 |
| TGIF2    | 0.822935 | 0.582641 | 1.162332 | 0.26867  |
| OLFM3    | 0.599997 | 0.1994   | 1.805402 | 0.363426 |
| PKD2     | 0.793041 | 0.630412 | 0.997624 | 0.047672 |
| ABCG2    | 1.000469 | 0.729562 | 1.371971 | 0.997679 |
| SPP1     | 0.972083 | 0.815825 | 1.15827  | 0.751492 |
| STBD1    | 1.727155 | 1.068081 | 2.79292  | 0.025843 |
| CCNI     | 0.711325 | 0.391994 | 1.290793 | 0.262552 |
| RARRES1  | 0.944846 | 0.62837  | 1.420713 | 0.785154 |
| MFSD1    | 1.021341 | 0.68735  | 1.517623 | 0.916766 |
| RAB3GAP2 | 1.242304 | 0.72237  | 2.136466 | 0.432851 |
| PPL      | 0.753207 | 0.513055 | 1.105771 | 0.147972 |
| UBN1     | 1.389933 | 0.78386  | 2.464616 | 0.259887 |
| KLF12    | 0.914101 | 0.768822 | 1.086832 | 0.309127 |
| UCHL3    | 0.844759 | 0.498153 | 1.432527 | 0.531271 |
| HS1BP3   | 1.374072 | 0.91882  | 2.054891 | 0.121711 |
| WDR35    | 0.998151 | 0.829153 | 1.201594 | 0.984398 |
| CCND2    | 0.791297 | 0.675283 | 0.927243 | 0.003806 |
| ELL2     | 1.026679 | 0.815428 | 1.292658 | 0.822754 |
| CYP20A1  | 0.994815 | 0.574249 | 1.723395 | 0.985206 |
| NDUFB3   | 1.604392 | 0.98156  | 2.622433 | 0.059332 |



|          |          |          |          |          |
|----------|----------|----------|----------|----------|
| GTF3C3   | 0.718934 | 0.45787  | 1.128849 | 0.151723 |
| SATB2    | 1.192098 | 0.871335 | 1.630943 | 0.27188  |
| UBE2B    | 0.669347 | 0.400149 | 1.119647 | 0.126161 |
| TRPM6    | 0.29742  | 0.153001 | 0.578155 | 0.000349 |
| KLF9     | 1.182024 | 0.989177 | 1.412467 | 0.065736 |
| TJP2     | 1.047043 | 0.674656 | 1.624977 | 0.837576 |
| ITGB1BP1 | 1.108568 | 0.72311  | 1.699499 | 0.636353 |
| CPSF3    | 1.162487 | 0.742433 | 1.820199 | 0.510455 |
| PIGZ     | 0.934955 | 0.682103 | 1.281538 | 0.675905 |
| SENP5    | 0.640479 | 0.426336 | 0.962183 | 0.031904 |
| CCDC92   | 1.065042 | 0.7789   | 1.456303 | 0.693043 |
| HEATR1   | 0.931322 | 0.647247 | 1.340078 | 0.701544 |
| RAD23B   | 1.059389 | 0.671049 | 1.672463 | 0.80441  |
| FKBP15   | 1.134315 | 0.846988 | 1.519114 | 0.397749 |
| CTNNA1   | 1.2185   | 0.956291 | 1.552605 | 0.10994  |
| SET      | 0.982168 | 0.609689 | 1.582207 | 0.941041 |
| GLE1     | 1.345878 | 0.716441 | 2.528313 | 0.355806 |
| RAB14    | 1.510264 | 0.840728 | 2.713001 | 0.167745 |
| TRIM32   | 1.403492 | 1.154214 | 1.706608 | 0.00068  |
| FBXW2    | 0.931089 | 0.568692 | 1.524423 | 0.776527 |
| PHF19    | 1.141057 | 0.765993 | 1.69977  | 0.516377 |
| NEK6     | 1.354771 | 1.051364 | 1.745737 | 0.018917 |
| BSPRY    | 1.140937 | 0.916905 | 1.419706 | 0.237143 |
| PPP6C    | 1.212319 | 0.620986 | 2.366748 | 0.572697 |
| NDUFA8   | 1.843844 | 1.207761 | 2.814927 | 0.004591 |
| HDHD3    | 1.383681 | 0.929946 | 2.058799 | 0.109213 |
| RBM18    | 1.196833 | 0.744006 | 1.925267 | 0.458816 |
| SLC46A2  | 1.081421 | 0.885177 | 1.321173 | 0.443584 |
| HSDL2    | 1.369937 | 0.897368 | 2.091369 | 0.144766 |
| MAPKAP1  | 2.047436 | 1.027877 | 4.078304 | 0.041533 |
| NR4A3    | 0.907021 | 0.712712 | 1.154305 | 0.427561 |
| INVS     | 0.795922 | 0.535328 | 1.183372 | 0.259342 |
| GALNT12  | 1.287435 | 1.058465 | 1.565937 | 0.011451 |
| DENND1A  | 1.137828 | 0.800133 | 1.618048 | 0.472291 |
| ALG2     | 1.665209 | 0.972264 | 2.852025 | 0.063239 |
| CSF3R    | 0.809149 | 0.669556 | 0.977846 | 0.028391 |
| KDSR     | 0.668011 | 0.406754 | 1.097073 | 0.110949 |
| VPS4B    | 0.836395 | 0.498722 | 1.402696 | 0.498267 |
| ONECUT2  | 1.299788 | 0.933293 | 1.810201 | 0.120788 |
| ZBTB45   | 1.437042 | 0.969439 | 2.13019  | 0.071009 |
| YLPM1    | 0.866052 | 0.518619 | 1.446239 | 0.58254  |
| PROX2    | 0.896392 | 0.612249 | 1.312405 | 0.573902 |
| VSX2     | 0.226341 | 0.011232 | 4.561009 | 0.332248 |
| FCF1     | 0.912809 | 0.504573 | 1.65134  | 0.762943 |
| PGF      | 1.129657 | 0.889548 | 1.434577 | 0.317329 |
| IFI27L2  | 1.577454 | 1.229877 | 2.023261 | 0.000332 |
| NEK9     | 1.324255 | 0.811032 | 2.162247 | 0.261566 |
| ACYP1    | 0.893789 | 0.592595 | 1.34807  | 0.592293 |
| NPC2     | 1.251903 | 0.925075 | 1.694198 | 0.145548 |
| DNAL1    | 0.558812 | 0.327886 | 0.952375 | 0.032407 |
| ACOT2    | 1.734175 | 1.230796 | 2.443428 | 0.001649 |
| LTBP2    | 0.831794 | 0.620086 | 1.115782 | 0.219099 |
| MLH3     | 0.881349 | 0.623437 | 1.245956 | 0.47459  |
| TTLL5    | 0.686196 | 0.400681 | 1.175163 | 0.170079 |
| FLVCR2   | 1.281802 | 1.020307 | 1.610316 | 0.032953 |
| ABCD4    | 0.874863 | 0.547134 | 1.398899 | 0.576679 |
| DLST     | 1.475218 | 0.825162 | 2.637384 | 0.189638 |
| TGFB3    | 0.880356 | 0.585487 | 1.32373  | 0.540324 |

|         |          |          |          |          |
|---------|----------|----------|----------|----------|
| RBM25   | 0.603674 | 0.376652 | 0.967529 | 0.035983 |
| ALDH6A1 | 0.72351  | 0.469927 | 1.113934 | 0.141585 |
| GPR68   | 1.018638 | 0.746874 | 1.389288 | 0.907152 |
| EIF2B2  | 1.138372 | 0.629256 | 2.0594   | 0.668302 |
| COQ6    | 0.979177 | 0.473118 | 2.026531 | 0.954783 |
| ZNF410  | 0.482567 | 0.255535 | 0.911309 | 0.024686 |
| RHOQ    | 1.085171 | 0.688092 | 1.711395 | 0.725098 |
| GPR75   | 0.855754 | 0.582274 | 1.257679 | 0.42782  |
| SUPT7L  | 0.729972 | 0.41673  | 1.27867  | 0.271123 |
| KLHL29  | 0.952113 | 0.774236 | 1.170856 | 0.641884 |
| DNMT3A  | 0.638684 | 0.448329 | 0.909861 | 0.013023 |
| TMEM214 | 1.204673 | 0.774291 | 1.874279 | 0.408989 |
| ATAD2B  | 0.609703 | 0.390904 | 0.950969 | 0.029137 |
| FKBP1B  | 0.60759  | 0.423184 | 0.872352 | 0.006935 |
| ATL2    | 0.481992 | 0.264325 | 0.878905 | 0.017262 |
| YPEL5   | 0.917889 | 0.625727 | 1.346465 | 0.661192 |
| FAM98A  | 1.063896 | 0.667422 | 1.695891 | 0.794592 |
| YIPF4   | 0.698637 | 0.443408 | 1.100777 | 0.122096 |
| AFTPH   | 1.76376  | 1.061954 | 2.929364 | 0.028366 |
| CNRIP1  | 0.972027 | 0.810749 | 1.165387 | 0.759221 |
| BCL11A  | 0.919381 | 0.714737 | 1.182617 | 0.512914 |
| CRIP1   | 0.663135 | 0.396076 | 1.110261 | 0.118244 |
| EPCAM   | 0.933775 | 0.806161 | 1.081591 | 0.360784 |
| SLC17A5 | 1.229241 | 0.782971 | 1.929871 | 0.369799 |
| OGFRL1  | 1.093458 | 0.88618  | 1.349218 | 0.404756 |
| IDE     | 0.794538 | 0.500359 | 1.261674 | 0.329659 |
| ELOVL3  | 1.165596 | 0.908844 | 1.494882 | 0.227414 |
| IFIT3   | 1.361361 | 1.118823 | 1.656478 | 0.002059 |
| NKX2-3  | 1.146428 | 1.038859 | 1.265137 | 0.006562 |
| IFIT2   | 1.314973 | 1.073936 | 1.610109 | 0.008039 |
| GPAM    | 0.89101  | 0.600455 | 1.322162 | 0.566585 |
| CUTC    | 1.021215 | 0.632376 | 1.649146 | 0.931583 |
| CNNM1   | 1.248587 | 1.066074 | 1.462347 | 0.005896 |
| MXI1    | 1.078001 | 0.730943 | 1.589846 | 0.704768 |
| SMNDC1  | 1.121722 | 0.560988 | 2.242935 | 0.745255 |
| HELLS   | 1.141891 | 0.887135 | 1.469803 | 0.302932 |
| TCTN3   | 1.058838 | 0.645149 | 1.737797 | 0.821069 |
| AVPI1   | 1.408372 | 1.03654  | 1.913588 | 0.028566 |
| KCNIP2  | 0.708206 | 0.44432  | 1.128816 | 0.146908 |
| GOT1    | 1.717964 | 1.081784 | 2.728272 | 0.021843 |
| SFRP5   | 1.265945 | 1.007782 | 1.590243 | 0.042705 |
| GNA13   | 0.959581 | 0.650265 | 1.416031 | 0.835371 |
| HOXB8   | 1.189085 | 1.034867 | 1.366285 | 0.014544 |
| HOXB5   | 1.176786 | 1.058919 | 1.307772 | 0.002502 |
| HOXB3   | 1.111323 | 1.014147 | 1.21781  | 0.023767 |
| DUSP1   | 1.024658 | 0.836611 | 1.254972 | 0.813847 |
| PANK3   | 0.852859 | 0.561433 | 1.295558 | 0.455602 |
| TEK     | 1.055334 | 0.782941 | 1.422495 | 0.723665 |
| RCL1    | 1.076095 | 0.767237 | 1.509285 | 0.670914 |
| INSL6   | 0.895904 | 0.676282 | 1.186846 | 0.443617 |
| MLANA   | 0.808605 | 0.589843 | 1.108502 | 0.186851 |
| CD274   | 1.338023 | 1.001176 | 1.788202 | 0.049079 |
| NUP43   | 0.764662 | 0.464712 | 1.258218 | 0.290975 |
| MTHFD1L | 0.928709 | 0.701183 | 1.230064 | 0.60598  |
| PCMT1   | 1.106476 | 0.718344 | 1.704322 | 0.646188 |
| PLEKHG1 | 0.894476 | 0.695864 | 1.149775 | 0.384024 |
| MYCT1   | 1.090464 | 0.969205 | 1.226894 | 0.149896 |
| WDR55   | 0.879094 | 0.549626 | 1.406059 | 0.590733 |

|          |          |          |          |          |
|----------|----------|----------|----------|----------|
| ARAP3    | 0.987004 | 0.846956 | 1.15021  | 0.866945 |
| SLC25A2  | 0.547991 | 0.238884 | 1.257073 | 0.155639 |
| TNN      | 0.802865 | 0.595479 | 1.082477 | 0.149824 |
| MRPS14   | 1.285565 | 0.676955 | 2.44134  | 0.442687 |
| CENPL    | 1.27466  | 0.754521 | 2.153364 | 0.36435  |
| ACAT2    | 1.512864 | 0.977278 | 2.341973 | 0.063329 |
| TCP1     | 1.08306  | 0.701806 | 1.671429 | 0.718527 |
| SNX19    | 1.139163 | 0.781339 | 1.660856 | 0.498212 |
| KCNJ5    | 0.659938 | 0.31142  | 1.398491 | 0.278074 |
| ARR3     | 1.107357 | 0.77223  | 1.58792  | 0.579236 |
| PDZD11   | 1.684527 | 0.955306 | 2.97039  | 0.071551 |
| SLC10A7  | 0.473878 | 0.256494 | 0.875497 | 0.017102 |
| NUDCD1   | 0.906332 | 0.608172 | 1.350667 | 0.628972 |
| ENY2     | 1.433645 | 0.806158 | 2.549548 | 0.220058 |
| MASTL    | 1.390298 | 0.845301 | 2.286673 | 0.194298 |
| KIAA1217 | 0.810659 | 0.644769 | 1.019231 | 0.072351 |
| PLXDC2   | 0.969518 | 0.827266 | 1.13623  | 0.702176 |
| EPC1     | 0.665903 | 0.356203 | 1.244871 | 0.202735 |
| IQSEC3   | 1.057917 | 0.907902 | 1.232721 | 0.47053  |
| CCDC77   | 0.73154  | 0.438598 | 1.220139 | 0.231044 |
| TAF12    | 1.404378 | 0.797755 | 2.472282 | 0.239236 |
| MTRF1    | 0.795419 | 0.499295 | 1.267169 | 0.335368 |
| DNAJC15  | 1.459782 | 1.035717 | 2.057477 | 0.030743 |
| UFM1     | 0.638774 | 0.395556 | 1.031543 | 0.066808 |
| WBP4     | 1.015004 | 0.596801 | 1.726259 | 0.956169 |
| ELF1     | 0.907345 | 0.565553 | 1.455697 | 0.686843 |
| SMAD9    | 0.663488 | 0.400822 | 1.098284 | 0.110626 |
| HSPH1    | 1.098459 | 0.779737 | 1.547461 | 0.591221 |
| KBTBD7   | 1.134524 | 0.803969 | 1.600988 | 0.4726   |
| ALG5     | 0.676517 | 0.368845 | 1.240833 | 0.206685 |
| EXOSC8   | 0.955382 | 0.521156 | 1.751406 | 0.882652 |
| ETF1     | 0.968703 | 0.663266 | 1.414794 | 0.869312 |
| TGFBI    | 1.006839 | 0.89511  | 1.132515 | 0.909575 |
| FAM53C   | 1.044735 | 0.662608 | 1.647233 | 0.850582 |
| SIL1     | 1.062653 | 0.719708 | 1.569014 | 0.759872 |
| PAIP2    | 0.78453  | 0.463124 | 1.328991 | 0.366866 |
| MYOT     | 1.341629 | 0.916654 | 1.963628 | 0.130488 |
| KDM3B    | 0.678648 | 0.441488 | 1.043206 | 0.077204 |
| EGR1     | 0.899797 | 0.802385 | 1.009036 | 0.070903 |
| SERP1    | 0.955089 | 0.524613 | 1.738797 | 0.880514 |
| PLS1     | 1.154396 | 0.962183 | 1.385006 | 0.122321 |
| ZFP30    | 0.678446 | 0.474678 | 0.969686 | 0.033264 |
| NR2C1    | 0.523077 | 0.303365 | 0.901917 | 0.019735 |
| UTP20    | 0.909875 | 0.63771  | 1.298196 | 0.602485 |
| TMPO     | 0.880635 | 0.595977 | 1.301254 | 0.523417 |
| ARL1     | 0.723633 | 0.433301 | 1.208501 | 0.216382 |
| GLT8D2   | 0.750873 | 0.340883 | 1.65397  | 0.477013 |
| SOCS2    | 1.192839 | 1.052164 | 1.352323 | 0.005884 |
| NFYB     | 0.587394 | 0.349748 | 0.986515 | 0.044295 |
| APAF1    | 0.990066 | 0.726208 | 1.349794 | 0.94966  |
| DUSP4    | 0.961968 | 0.731439 | 1.265152 | 0.781479 |
| CLU      | 1.014585 | 0.918111 | 1.121195 | 0.776388 |
| TNFRSF10 | 1.308919 | 0.976694 | 1.754151 | 0.071529 |
| SORBS3   | 1.30672  | 1.065387 | 1.60272  | 0.01023  |
| PTK2B    | 1.505719 | 1.031903 | 2.197096 | 0.033766 |
| CHRNA2   | 1.144066 | 0.723228 | 1.809784 | 0.565169 |
| PPP3CC   | 1.250973 | 0.859806 | 1.820101 | 0.241825 |
| PDLIM2   | 1.758687 | 1.251149 | 2.472111 | 0.001155 |

|          |          |          |          |          |
|----------|----------|----------|----------|----------|
| EPHX2    | 1.175541 | 0.900142 | 1.535199 | 0.23503  |
| RNF170   | 0.96931  | 0.567044 | 1.656947 | 0.909278 |
| NPPB     | 1.275562 | 0.851738 | 1.910279 | 0.237536 |
| UBIAD1   | 1.380831 | 0.834146 | 2.285805 | 0.209558 |
| TARDBP   | 1.109695 | 0.606052 | 2.031875 | 0.735917 |
| TNFRSF8  | 1.178325 | 0.95468  | 1.454361 | 0.126495 |
| ZNF706   | 1.215749 | 0.674183 | 2.192351 | 0.516075 |
| LYPLA1   | 1.140758 | 0.758962 | 1.714618 | 0.526464 |
| CRISPLD1 | 1.2818   | 1.077247 | 1.525195 | 0.005129 |
| COPS5    | 1.024569 | 0.552504 | 1.899973 | 0.938598 |
| RDH10    | 1.481103 | 1.076977 | 2.036874 | 0.015686 |
| EPX      | 0.874641 | 0.756218 | 1.011608 | 0.071157 |
| AKAP1    | 1.329546 | 0.887229 | 1.992375 | 0.167529 |
| COIL     | 0.770016 | 0.469993 | 1.261561 | 0.299486 |
| TRIM25   | 1.288424 | 0.85713  | 1.936736 | 0.222987 |
| SCPEP1   | 1.103503 | 0.965111 | 1.261739 | 0.149713 |
| SPOP     | 2.058138 | 1.055721 | 4.012361 | 0.034077 |
| SLC35B1  | 0.672537 | 0.340302 | 1.329131 | 0.253724 |
| TEX14    | 1.151017 | 0.928022 | 1.427597 | 0.200515 |
| FAM117A  | 0.980619 | 0.76523  | 1.256635 | 0.877086 |
| NCAPH    | 1.079279 | 0.800206 | 1.455681 | 0.617211 |
| MND1     | 0.751746 | 0.460157 | 1.228106 | 0.254504 |
| TRIM6    | 0.67362  | 0.531318 | 0.854033 | 0.001102 |
| ADCY7    | 1.242954 | 1.012964 | 1.525164 | 0.03722  |
| TSHZ3    | 0.914331 | 0.774202 | 1.079824 | 0.291345 |
| ECHDC2   | 1.012811 | 0.844565 | 1.214573 | 0.890763 |
| TAS2R10  | 0.826283 | 0.616021 | 1.108313 | 0.202812 |
| PRB2     | 0.761572 | 0.391675 | 1.480801 | 0.422081 |
| PYROXD1  | 0.847368 | 0.513816 | 1.397452 | 0.516424 |
| PSPC1    | 1.025695 | 0.508095 | 2.070577 | 0.943567 |
| ZNF549   | 0.717583 | 0.479727 | 1.073372 | 0.10624  |
| A1BG     | 0.581599 | 0.412148 | 0.82072  | 0.00204  |
| ZSCAN18  | 0.972422 | 0.723576 | 1.306849 | 0.852888 |
| ZNF211   | 0.930499 | 0.622211 | 1.391535 | 0.725724 |
| PDZRN3   | 0.657207 | 0.331545 | 1.302755 | 0.22922  |
| LHX4     | 0.624643 | 0.442123 | 0.882511 | 0.007612 |
| RNF2     | 1.30712  | 0.843288 | 2.026072 | 0.231024 |
| SEC22A   | 1.160046 | 0.647572 | 2.078081 | 0.617699 |
| CSTA     | 1.0543   | 0.93783  | 1.185235 | 0.375994 |
| DPPA4    | 1.122446 | 1.013984 | 1.242511 | 0.025894 |
| POPDC2   | 1.484553 | 0.889168 | 2.478609 | 0.13084  |
| B4GALT4  | 1.476823 | 0.848024 | 2.571869 | 0.168345 |
| CD80     | 1.371542 | 0.979392 | 1.920709 | 0.065949 |
| KIF18A   | 1.11669  | 0.802564 | 1.553767 | 0.512537 |
| MAPK8IP1 | 1.068178 | 0.697163 | 1.63664  | 0.761922 |
| CRY2     | 1.716532 | 1.038475 | 2.837317 | 0.0351   |
| PEX16    | 1.7519   | 1.160465 | 2.644764 | 0.007627 |
| DEPDC7   | 0.759012 | 0.626651 | 0.919331 | 0.004799 |
| CAT      | 1.212537 | 0.963795 | 1.525475 | 0.099937 |
| PILRB    | 0.844813 | 0.57792  | 1.23496  | 0.384001 |
| ZMYM2    | 0.482932 | 0.308789 | 0.755283 | 0.001423 |
| GJB6     | 0.706149 | 0.463798 | 1.075138 | 0.104765 |
| TBC1D15  | 1.014626 | 0.650967 | 1.581441 | 0.948872 |
| HCRTR1   | 1.062067 | 0.79771  | 1.414032 | 0.680089 |
| ZCCHC17  | 3.177377 | 1.614532 | 6.253034 | 0.000817 |
| FABP3    | 0.82566  | 0.559419 | 1.218612 | 0.334783 |
| KHDRBS1  | 1.120733 | 0.593193 | 2.117426 | 0.725483 |
| TMEM39B  | 1.357686 | 0.797796 | 2.310505 | 0.259652 |

|          |          |          |          |          |
|----------|----------|----------|----------|----------|
| CCRL2    | 1.329983 | 0.997748 | 1.772847 | 0.051824 |
| CCR2     | 1.098824 | 0.994414 | 1.214196 | 0.064314 |
| POLR3GL  | 1.955833 | 1.150256 | 3.325595 | 0.013256 |
| TNFSF10  | 1.055482 | 0.890243 | 1.251392 | 0.534201 |
| ZNF639   | 0.703001 | 0.454506 | 1.087359 | 0.113285 |
| PIK3CA   | 0.53227  | 0.322601 | 0.87821  | 0.013576 |
| PDS5A    | 0.801318 | 0.500007 | 1.284202 | 0.357326 |
| TMEM156  | 1.490973 | 1.080658 | 2.057083 | 0.015002 |
| LIAS     | 0.810783 | 0.482119 | 1.363499 | 0.429008 |
| ZSCAN20  | 0.820704 | 0.505185 | 1.333285 | 0.424805 |
| CLCC1    | 1.029126 | 0.754463 | 1.403779 | 0.856173 |
| GPSM2    | 0.760093 | 0.5587   | 1.034083 | 0.080712 |
| GTDC1    | 0.891323 | 0.539204 | 1.473386 | 0.653693 |
| CXCR4    | 1.105551 | 0.894306 | 1.366694 | 0.353686 |
| ZRANB3   | 0.717461 | 0.485739 | 1.059725 | 0.095222 |
| ACVR2A   | 1.261856 | 0.935013 | 1.702952 | 0.12835  |
| POLK     | 0.794249 | 0.518409 | 1.216859 | 0.28993  |
| FLT3     | 1.115388 | 0.918904 | 1.353886 | 0.269359 |
| RPL21    | 1.205222 | 0.767781 | 1.891894 | 0.417158 |
| MTIF3    | 0.817965 | 0.52627  | 1.271336 | 0.371844 |
| GTF3A    | 1.236537 | 0.780295 | 1.959546 | 0.366077 |
| RASL11A  | 1.482679 | 1.097513 | 2.003018 | 0.010281 |
| UBL3     | 1.095934 | 0.777578 | 1.544631 | 0.600846 |
| FYTTD1   | 0.740526 | 0.487382 | 1.125152 | 0.159288 |
| XPNPEP2  | 0.908723 | 0.644376 | 1.281515 | 0.585253 |
| SASH3    | 1.493851 | 1.098341 | 2.031783 | 0.010536 |
| OCRL     | 0.923916 | 0.600562 | 1.42137  | 0.718799 |
| MRPS2    | 1.333975 | 0.854761 | 2.081856 | 0.204472 |
| FMOD     | 1.026004 | 0.790614 | 1.331478 | 0.846908 |
| LAX1     | 0.86511  | 0.698788 | 1.071019 | 0.183473 |
| KIAA1191 | 1.216617 | 0.676525 | 2.187882 | 0.512571 |
| COPA     | 1.267828 | 0.752253 | 2.136766 | 0.37291  |
| CD244    | 0.923847 | 0.701128 | 1.217314 | 0.573583 |
| LY9      | 0.922299 | 0.717515 | 1.185528 | 0.527765 |
| HS3ST2   | 0.575367 | 0.203268 | 1.628628 | 0.297778 |
| RBBP6    | 1.026138 | 0.573561 | 1.835827 | 0.930721 |
| ZC3H7A   | 1.037405 | 0.600704 | 1.791581 | 0.895196 |
| SERAC1   | 0.641033 | 0.403176 | 1.019215 | 0.060174 |
| ANXA11   | 1.995189 | 1.17548  | 3.386513 | 0.0105   |
| ZNF205   | 0.874706 | 0.620148 | 1.233756 | 0.44554  |
| RPL5     | 1.026229 | 0.719611 | 1.463493 | 0.886314 |
| ODF2L    | 0.909645 | 0.634037 | 1.305055 | 0.607088 |
| SPATA1   | 0.836511 | 0.592121 | 1.18177  | 0.31125  |
| LRRRC39  | 0.875798 | 0.552082 | 1.389324 | 0.573227 |
| RWDD3    | 0.774913 | 0.512032 | 1.172758 | 0.227745 |
| ZNF644   | 0.761275 | 0.499714 | 1.159742 | 0.204098 |
| CCDC18   | 0.778939 | 0.50174  | 1.209282 | 0.26562  |
| RPAP2    | 0.751562 | 0.531465 | 1.062809 | 0.106221 |
| BBS9     | 0.560975 | 0.312709 | 1.006344 | 0.052531 |
| PMS2     | 0.748184 | 0.445829 | 1.255591 | 0.272078 |
| ZMIZ2    | 0.939933 | 0.656148 | 1.346456 | 0.735513 |
| OCM      | 0.866912 | 0.650821 | 1.154751 | 0.328898 |
| EEPD1    | 0.774802 | 0.579375 | 1.036148 | 0.08534  |
| KIAA0087 | 1.109735 | 0.964177 | 1.277268 | 0.146657 |
| KLHL7    | 0.744402 | 0.448279 | 1.23614  | 0.253991 |
| HERPUD2  | 0.859198 | 0.482634 | 1.529566 | 0.606049 |
| CBX3     | 0.862577 | 0.56969  | 1.306043 | 0.484892 |
| HNRNPA2  | 0.629482 | 0.37385  | 1.05991  | 0.081667 |

|          |          |          |          |          |
|----------|----------|----------|----------|----------|
| WIPF3    | 0.885994 | 0.634512 | 1.23715  | 0.477322 |
| NPY      | 1.205325 | 0.792065 | 1.834202 | 0.383335 |
| FAM126A  | 1.017344 | 0.730506 | 1.416811 | 0.918951 |
| HOXA7    | 1.2661   | 1.105328 | 1.450257 | 0.000661 |
| INHBA    | 1.194504 | 1.003314 | 1.422126 | 0.045809 |
| FKBP9    | 0.947633 | 0.730744 | 1.228896 | 0.68502  |
| ARL4A    | 0.994575 | 0.803394 | 1.231251 | 0.960167 |
| POLM     | 0.966237 | 0.612419 | 1.52447  | 0.882638 |
| RAMP3    | 1.119747 | 0.794514 | 1.578115 | 0.518246 |
| TWIST1   | 0.553223 | 0.391132 | 0.782485 | 0.000818 |
| SMU1     | 1.644814 | 0.848136 | 3.189832 | 0.140872 |
| GLIPR2   | 1.190613 | 0.978024 | 1.449411 | 0.082116 |
| CLTA     | 3.467843 | 1.740232 | 6.910538 | 0.000408 |
| RECK     | 1.312374 | 1.105218 | 1.558358 | 0.001927 |
| SPINK4   | 0.83806  | 0.625955 | 1.122038 | 0.235394 |
| ACO1     | 1.038079 | 0.673805 | 1.599287 | 0.865419 |
| DCAF10   | 0.751245 | 0.441245 | 1.279038 | 0.292117 |
| KIAA1549 | 0.719338 | 0.589175 | 0.878259 | 0.001218 |
| TRIM24   | 0.573131 | 0.414333 | 0.792788 | 0.000772 |
| CALD1    | 1.061094 | 0.804846 | 1.398927 | 0.674125 |
| NUDT10   | 0.833663 | 0.705123 | 0.985634 | 0.033227 |
| NEUROG3  | 1.385544 | 0.638429 | 3.006962 | 0.409452 |
| PLAU     | 0.981843 | 0.797071 | 1.209449 | 0.863235 |
| SRGN     | 1.03332  | 0.897551 | 1.189625 | 0.648349 |
| BICC1    | 0.81684  | 0.584765 | 1.141019 | 0.235478 |
| CISD1    | 1.71939  | 1.068579 | 2.766574 | 0.02553  |
| EGR2     | 1.1567   | 0.99205  | 1.348678 | 0.063157 |
| ECD      | 0.892969 | 0.462573 | 1.723821 | 0.735872 |
| P4HA1    | 1.03878  | 0.693163 | 1.556723 | 0.853751 |
| SLC25A16 | 0.816193 | 0.436772 | 1.525216 | 0.524335 |
| ZWINT    | 1.333648 | 0.962544 | 1.847829 | 0.083539 |
| VPS26A   | 1.462575 | 0.854305 | 2.503937 | 0.165763 |
| RBM19    | 1.056033 | 0.669235 | 1.66639  | 0.814781 |
| CIT      | 0.88537  | 0.642147 | 1.220716 | 0.457513 |
| IFT81    | 0.653692 | 0.442719 | 0.965201 | 0.032509 |
| ACADS    | 1.439149 | 0.993678 | 2.084329 | 0.054054 |
| HVCN1    | 1.122277 | 0.905155 | 1.391481 | 0.292987 |
| NME2P1   | 1.04058  | 0.695318 | 1.557283 | 0.846662 |
| DDX54    | 1.456605 | 0.944797 | 2.245665 | 0.088593 |
| MED13L   | 0.764275 | 0.524944 | 1.112722 | 0.160717 |
| CDKN2C   | 1.034126 | 0.821196 | 1.302267 | 0.775438 |
| RNF11    | 1.115244 | 0.686537 | 1.811656 | 0.659482 |
| RASSF8   | 1.049234 | 0.788248 | 1.396631 | 0.741888 |
| ITPR2    | 0.567199 | 0.434752 | 0.739997 | 2.93E-05 |
| CCDC91   | 0.95877  | 0.568355 | 1.617368 | 0.874602 |
| NECAB1   | 1.041014 | 0.836796 | 1.295069 | 0.718273 |
| WWP1     | 0.836801 | 0.531293 | 1.317987 | 0.442067 |
| ACOT9    | 1.752505 | 1.233327 | 2.490236 | 0.001749 |
| PRDX4    | 1.527209 | 1.17753  | 1.980729 | 0.001414 |
| PKN1     | 1.89707  | 1.270486 | 2.832674 | 0.001746 |
| GIPC1    | 1.210224 | 0.932264 | 1.571059 | 0.151817 |
| EBPL     | 0.921711 | 0.672957 | 1.262414 | 0.611469 |
| ATP7B    | 0.912551 | 0.756204 | 1.101223 | 0.339891 |
| ZC3H13   | 0.99694  | 0.649478 | 1.53029  | 0.988817 |
| GUCY1B2  | 0.89976  | 0.647676 | 1.249957 | 0.528851 |
| NLN      | 1.030367 | 0.694671 | 1.528288 | 0.881769 |
| CENPK    | 0.866381 | 0.628363 | 1.194557 | 0.381467 |
| OPTN     | 1.272207 | 1.059983 | 1.52692  | 0.009722 |

|          |          |          |          |          |
|----------|----------|----------|----------|----------|
| ATF1     | 1.177003 | 0.711635 | 1.946695 | 0.525544 |
| TSFM     | 0.528355 | 0.238699 | 1.169502 | 0.11555  |
| ARHGAP9  | 1.646335 | 1.164966 | 2.326607 | 0.004724 |
| NCKAP1L  | 1.464765 | 0.912899 | 2.350244 | 0.113601 |
| MMP19    | 1.094276 | 0.944746 | 1.267474 | 0.229451 |
| PFDN5    | 1.406716 | 0.87437  | 2.263172 | 0.159546 |
| SPATS2   | 1.107787 | 0.768964 | 1.595902 | 0.582622 |
| ORMDL2   | 2.224721 | 1.231933 | 4.017577 | 0.00801  |
| NR4A1    | 1.120265 | 0.968387 | 1.295962 | 0.126561 |
| PDE1B    | 1.485739 | 1.138762 | 1.938439 | 0.003528 |
| CDK2     | 0.822528 | 0.531601 | 1.272669 | 0.380334 |
| LRP1     | 1.061279 | 0.960485 | 1.17265  | 0.242761 |
| NFE2     | 0.979532 | 0.728144 | 1.317709 | 0.89129  |
| IKZF4    | 1.139174 | 0.733285 | 1.76973  | 0.56209  |
| SMUG1    | 1.029374 | 0.529303 | 2.0019   | 0.932016 |
| TUBA1B   | 1.236092 | 0.930207 | 1.642561 | 0.14396  |
| KBTBD4   | 1.272522 | 0.732997 | 2.209167 | 0.391827 |
| SARDH    | 1.193349 | 0.957668 | 1.487029 | 0.115337 |
| DBH      | 1.135756 | 0.837757 | 1.539756 | 0.412304 |
| ATPAF1   | 2.009545 | 1.120127 | 3.60519  | 0.019264 |
| STIL     | 1.014129 | 0.735036 | 1.399193 | 0.931916 |
| HJURP    | 0.904686 | 0.701832 | 1.166172 | 0.439373 |
| COL10A1  | 0.672871 | 0.417569 | 1.084264 | 0.103606 |
| AMD1     | 0.97821  | 0.652534 | 1.466429 | 0.915065 |
| USP45    | 0.807905 | 0.603843 | 1.080928 | 0.150985 |
| MORF4L2  | 0.82337  | 0.5109   | 1.326947 | 0.424762 |
| RAB9B    | 1.033615 | 0.818855 | 1.304701 | 0.78084  |
| RAB9A    | 1.352864 | 0.793972 | 2.305172 | 0.266358 |
| METTL8   | 0.927944 | 0.594467 | 1.448492 | 0.742041 |
| TTC21B   | 0.716369 | 0.446388 | 1.149639 | 0.166927 |
| NMI      | 1.261447 | 0.818012 | 1.945265 | 0.293267 |
| TNFAIP6  | 0.989965 | 0.81796  | 1.198139 | 0.917506 |
| BAZ2B    | 0.791301 | 0.538546 | 1.162681 | 0.233166 |
| SLC36A1  | 0.831582 | 0.67915  | 1.018228 | 0.074243 |
| LPGAT1   | 0.895826 | 0.654269 | 1.226564 | 0.492602 |
| BATF3    | 1.611657 | 1.15873  | 2.241626 | 0.004581 |
| G0S2     | 1.012282 | 0.892773 | 1.14779  | 0.848955 |
| KCNJ2    | 1.168198 | 0.937945 | 1.454975 | 0.16514  |
| RAP2C    | 1.257788 | 0.798582 | 1.981052 | 0.322392 |
| EXOSC9   | 0.941722 | 0.582223 | 1.523197 | 0.806655 |
| PLA2G12A | 0.951154 | 0.659918 | 1.370921 | 0.788316 |
| B9D2     | 0.941085 | 0.645352 | 1.372338 | 0.752393 |
| PFKFB2   | 1.123801 | 0.918973 | 1.374283 | 0.255581 |
| RAB38    | 0.91806  | 0.770422 | 1.09399  | 0.33921  |
| MXD4     | 1.146286 | 0.815527 | 1.611194 | 0.431873 |
| CKS2     | 1.155248 | 0.808452 | 1.650807 | 0.428118 |
| ACSL3    | 1.393075 | 0.908618 | 2.135837 | 0.128399 |
| CHPF     | 1.086887 | 0.872499 | 1.353954 | 0.457332 |
| DNPEP    | 1.52749  | 0.838462 | 2.782744 | 0.166281 |
| OBSL1    | 0.968025 | 0.838864 | 1.117074 | 0.656497 |
| FAM124B  | 1.35314  | 1.075489 | 1.702471 | 0.00985  |
| SLC12A4  | 1.300962 | 0.931747 | 1.816483 | 0.122378 |
| GCNT7    | 0.742626 | 0.508291 | 1.084996 | 0.123986 |
| PI3      | 1.15074  | 0.927298 | 1.428023 | 0.202415 |
| SNX21    | 1.346233 | 0.926824 | 1.955435 | 0.118528 |
| SLPI     | 0.98624  | 0.89932  | 1.081562 | 0.768499 |
| TTPAL    | 1.059455 | 0.642602 | 1.746718 | 0.820891 |
| PREX1    | 1.507283 | 1.11701  | 2.033913 | 0.00728  |

|         |          |          |          |          |
|---------|----------|----------|----------|----------|
| KCNS1   | 1.210236 | 0.765783 | 1.912646 | 0.413836 |
| SDC4    | 1.158246 | 0.971197 | 1.38132  | 0.102102 |
| NCOA3   | 1.099099 | 0.740598 | 1.63114  | 0.638992 |
| PIGT    | 0.951937 | 0.652851 | 1.38804  | 0.797969 |
| MATN4   | 1.052092 | 0.871774 | 1.269707 | 0.596537 |
| NCOA5   | 1.199615 | 0.671781 | 2.142178 | 0.538414 |
| VAPB    | 1.421984 | 0.738692 | 2.73732  | 0.29208  |
| PARD6B  | 1.04509  | 0.728732 | 1.498784 | 0.81053  |
| CHD6    | 0.653876 | 0.438771 | 0.974437 | 0.036871 |
| PLCG1   | 1.050672 | 0.866703 | 1.273691 | 0.614749 |
| TOX2    | 0.994117 | 0.687885 | 1.436676 | 0.974946 |
| ARFGEF2 | 0.818256 | 0.536175 | 1.248739 | 0.352364 |
| ZNFX1   | 1.300202 | 0.821051 | 2.058979 | 0.263014 |
| ZNF831  | 1.225013 | 0.911254 | 1.646802 | 0.17883  |
| CSE1L   | 1.023479 | 0.699854 | 1.496754 | 0.904743 |
| RAB22A  | 0.707788 | 0.403585 | 1.241282 | 0.22788  |
| STAU1   | 1.558486 | 0.771128 | 3.149776 | 0.216461 |
| CDH26   | 0.709402 | 0.552535 | 0.910805 | 0.007088 |
| SNAI1   | 1.000879 | 0.849632 | 1.17905  | 0.991618 |
| MOCS3   | 1.188465 | 0.705695 | 2.001499 | 0.516176 |
| STX16   | 1.378388 | 0.816703 | 2.326371 | 0.229466 |
| PPP4R1L | 1.09199  | 0.842757 | 1.414931 | 0.505574 |
| PMEPA1  | 0.856347 | 0.662574 | 1.106791 | 0.236101 |
| RNF114  | 0.803405 | 0.449655 | 1.435457 | 0.459773 |
| DDX27   | 1.109835 | 0.642349 | 1.917546 | 0.708765 |
| BCAS4   | 0.99052  | 0.758165 | 1.294084 | 0.944323 |
| TP53TG5 | 0.881952 | 0.565705 | 1.374991 | 0.57928  |
| ZBP1    | 1.561004 | 1.16738  | 2.087352 | 0.002666 |
| NEURL2  | 0.978108 | 0.602373 | 1.588211 | 0.928687 |
| MTRR    | 1.019523 | 0.591221 | 1.758101 | 0.944556 |
| FASTKD3 | 1.011944 | 0.611879 | 1.673582 | 0.963107 |
| PEPD    | 1.408302 | 1.007962 | 1.967649 | 0.04481  |
| IQSEC2  | 1.089013 | 0.88286  | 1.343304 | 0.425809 |
| VAMP7   | 1.046489 | 0.612501 | 1.78798  | 0.867944 |
| IL9R    | 0.76546  | 0.515352 | 1.136948 | 0.185464 |
| XG      | 0.848882 | 0.567243 | 1.270355 | 0.425717 |
| STAMBP  | 0.817784 | 0.433819 | 1.541588 | 0.534013 |
| NAGK    | 1.115983 | 0.788951 | 1.578574 | 0.535126 |
| MCEE    | 0.756089 | 0.449457 | 1.271913 | 0.292064 |
| PAIP2B  | 1.009351 | 0.791839 | 1.286613 | 0.940082 |
| SNRNP27 | 1.130725 | 0.590663 | 2.16458  | 0.710772 |
| MPHOSP1 | 0.910319 | 0.596612 | 1.388979 | 0.662947 |
| IL17C   | 1.116513 | 0.789948 | 1.578082 | 0.532427 |
| ATP8A1  | 1.081487 | 0.905065 | 1.292298 | 0.3886   |
| USP22   | 0.977044 | 0.642703 | 1.485312 | 0.913462 |
| POF1B   | 0.956992 | 0.493863 | 1.854428 | 0.896373 |
| HIF3A   | 1.467873 | 1.032353 | 2.087126 | 0.032576 |
| ZNF576  | 1.157185 | 0.585374 | 2.287555 | 0.674584 |
| IRGC    | 1.112179 | 0.768264 | 1.610049 | 0.573236 |
| ZNF45   | 0.854663 | 0.572041 | 1.276918 | 0.44329  |
| LYPD3   | 2.211743 | 1.445728 | 3.383628 | 0.000253 |
| CEACAM8 | 0.992223 | 0.882085 | 1.116113 | 0.896519 |
| USP9X   | 1.068337 | 0.699443 | 1.631789 | 0.759701 |
| CRISP2  | 0.787472 | 0.519644 | 1.193341 | 0.259933 |
| F13A1   | 0.986273 | 0.880817 | 1.104355 | 0.810663 |
| TRERF1  | 0.802625 | 0.649197 | 0.992314 | 0.04223  |
| PACSIN1 | 1.26592  | 1.111251 | 1.442116 | 0.00039  |
| BTN2A2  | 1.236425 | 0.909688 | 1.680517 | 0.175279 |



|          |          |          |          |          |
|----------|----------|----------|----------|----------|
| SIRT5    | 0.736971 | 0.456936 | 1.188626 | 0.210774 |
| MRS2     | 0.897657 | 0.549756 | 1.465718 | 0.666042 |
| WRNIP1   | 0.949377 | 0.627997 | 1.435225 | 0.805393 |
| SNRPC    | 1.340062 | 0.780783 | 2.299954 | 0.288195 |
| SERPINB6 | 1.407072 | 1.117124 | 1.772275 | 0.003723 |
| XPO5     | 0.938642 | 0.596    | 1.47827  | 0.784664 |
| ABCC10   | 1.310107 | 0.841402 | 2.039905 | 0.231855 |
| PEX6     | 1.106093 | 0.759059 | 1.611787 | 0.599652 |
| NQO2     | 1.057286 | 0.756107 | 1.478433 | 0.744697 |
| UNC5CL   | 1.220066 | 0.829775 | 1.793935 | 0.311891 |
| AARS2    | 1.328772 | 0.813762 | 2.16972  | 0.25587  |
| ZNF391   | 1.023653 | 0.850433 | 1.232154 | 0.804791 |
| RPS10    | 1.054917 | 0.669839 | 1.661369 | 0.817539 |
| MOCS1    | 1.143085 | 0.818601 | 1.59619  | 0.432446 |
| MED20    | 2.708696 | 1.424226 | 5.151592 | 0.00238  |
| OR2B6    | 1.142704 | 0.875804 | 1.490941 | 0.325672 |
| TBCC     | 2.286971 | 1.458134 | 3.586939 | 0.000315 |
| SPDEF    | 1.712441 | 0.756266 | 3.877543 | 0.197046 |
| TCP11    | 0.70146  | 0.420092 | 1.171282 | 0.175237 |
| MAD2L1Bf | 1.86856  | 0.973413 | 3.586881 | 0.060248 |
| APOBEC2  | 1.17362  | 0.780658 | 1.764387 | 0.441534 |
| KLHDC3   | 1.350092 | 0.805132 | 2.26391  | 0.255063 |
| GNMT     | 1.061114 | 0.803203 | 1.401841 | 0.676304 |
| DNAH8    | 0.619488 | 0.292945 | 1.310028 | 0.210124 |
| TREM1    | 1.083114 | 0.944137 | 1.242549 | 0.254487 |
| MEA1     | 2.58428  | 1.337583 | 4.992962 | 0.004719 |
| CDKN1A   | 1.175044 | 0.9916   | 1.392425 | 0.062524 |
| SOX4     | 0.849053 | 0.703544 | 1.024657 | 0.088006 |
| GLO1     | 1.339867 | 0.919074 | 1.953318 | 0.128212 |
| CPNE5    | 1.102327 | 0.81698  | 1.487338 | 0.523855 |
| KCNK17   | 1.004028 | 0.899052 | 1.121262 | 0.94312  |
| RREB1    | 0.541786 | 0.330372 | 0.888488 | 0.015164 |
| SSR1     | 0.699981 | 0.430983 | 1.136875 | 0.149433 |
| RIOK1    | 1.022035 | 0.620042 | 1.684653 | 0.931882 |
| NRN1     | 1.102775 | 0.771773 | 1.575738 | 0.591093 |
| SLC35B3  | 0.947681 | 0.589586 | 1.52327  | 0.824375 |
| RPP40    | 1.032732 | 0.749179 | 1.423606 | 0.844092 |
| ATXN1    | 0.856513 | 0.709654 | 1.033763 | 0.106538 |
| NUP153   | 0.738671 | 0.446105 | 1.22311  | 0.239102 |
| DEK      | 1.298996 | 0.859856 | 1.962409 | 0.213983 |
| EEF1E1   | 0.961664 | 0.636078 | 1.453908 | 0.852952 |
| RUNX2    | 0.962773 | 0.749658 | 1.236472 | 0.766323 |
| LRRFIP1  | 1.336258 | 0.872381 | 2.046795 | 0.182727 |
| RAB17    | 2.494763 | 1.597615 | 3.89571  | 5.81E-05 |
| CXCL6    | 1.320713 | 0.80495  | 2.166945 | 0.270853 |
| EREG     | 1.080815 | 0.995271 | 1.173712 | 0.064704 |
| AHNAK    | 1.117382 | 0.920867 | 1.355834 | 0.260748 |
| WNT1     | 1.068606 | 0.659947 | 1.730318 | 0.787277 |
| SH3TC1   | 1.458707 | 1.205524 | 1.765062 | 0.000104 |
| CNOT1    | 0.906372 | 0.642088 | 1.279436 | 0.576215 |
| LRRC29   | 1.017972 | 0.698972 | 1.482558 | 0.926013 |
| BBS2     | 0.882141 | 0.582915 | 1.334967 | 0.553019 |
| MT1G     | 1.107237 | 0.922593 | 1.328835 | 0.273777 |
| MT2A     | 1.04253  | 0.864748 | 1.256863 | 0.662388 |
| GOT2     | 1.69498  | 1.024988 | 2.802917 | 0.039769 |
| DOK4     | 1.028571 | 0.826354 | 1.280272 | 0.800868 |
| GPR18    | 0.870963 | 0.654898 | 1.158314 | 0.342264 |
| CLYBL    | 1.443765 | 0.859041 | 2.426495 | 0.165627 |

|          |          |          |          |          |
|----------|----------|----------|----------|----------|
| TMTC4    | 0.548608 | 0.341166 | 0.882182 | 0.013242 |
| RAP2A    | 0.919015 | 0.669745 | 1.26106  | 0.600877 |
| SLC10A2  | 1.114698 | 0.960999 | 1.292978 | 0.151449 |
| ABCC4    | 1.001902 | 0.82231  | 1.220715 | 0.984962 |
| EFNB2    | 0.542671 | 0.286004 | 1.029677 | 0.061418 |
| TM9SF2   | 1.15928  | 0.66354  | 2.025394 | 0.60364  |
| IRF1     | 1.130546 | 0.847553 | 1.508029 | 0.403868 |
| UPF3B    | 1.079709 | 0.663342 | 1.757424 | 0.757662 |
| RNF113A  | 1.964805 | 1.204618 | 3.204715 | 0.006815 |
| NDUFA1   | 1.753898 | 1.126158 | 2.73155  | 0.012934 |
| BMP4     | 0.532344 | 0.347752 | 0.81492  | 0.003707 |
| PTGER2   | 1.09206  | 0.84827  | 1.405914 | 0.494446 |
| FAM193A  | 0.819852 | 0.453055 | 1.483613 | 0.511576 |
| GRK4     | 0.974498 | 0.671681 | 1.413837 | 0.89178  |
| HS3ST3B1 | 0.672231 | 0.551204 | 0.819831 | 8.80E-05 |
| SLC25A35 | 1.174465 | 0.836481 | 1.649012 | 0.353014 |
| MRPS7    | 2.025687 | 1.057647 | 3.879752 | 0.033254 |
| GGA3     | 0.910486 | 0.596764 | 1.389134 | 0.663512 |
| ARMC7    | 1.408973 | 0.860406 | 2.307288 | 0.173044 |
| NUP85    | 0.864702 | 0.549199 | 1.361454 | 0.530211 |
| SLC25A19 | 1.111803 | 0.683073 | 1.809626 | 0.669804 |
| MIF4GD   | 1.05678  | 0.730208 | 1.529406 | 0.769659 |
| NT5C     | 0.991962 | 0.702733 | 1.400233 | 0.963401 |
| MSTO1    | 0.955044 | 0.56221  | 1.622364 | 0.8649   |
| TTF1     | 1.032842 | 0.634779 | 1.680525 | 0.896483 |
| GTF3C4   | 0.977821 | 0.611598 | 1.563338 | 0.925364 |
| DDX31    | 1.001489 | 0.677709 | 1.479959 | 0.99404  |
| PPP1R12C | 1.539171 | 1.008231 | 2.349707 | 0.045723 |
| MBOAT7   | 1.096278 | 0.786927 | 1.527239 | 0.58685  |
| SRMS     | 1.513603 | 0.830232 | 2.759462 | 0.176132 |
| OPRL1    | 1.343164 | 0.795793 | 2.267033 | 0.269294 |
| SLC2A4RG | 1.053872 | 0.828941 | 1.339837 | 0.668383 |
| PPDPF    | 1.514974 | 1.160698 | 1.977384 | 0.00224  |
| IL1B     | 0.987408 | 0.830235 | 1.174336 | 0.886088 |
| CHCHD5   | 1.336505 | 0.84893  | 2.104113 | 0.210329 |
| PAX8     | 1.100628 | 0.895587 | 1.352611 | 0.362004 |
| INSIG2   | 0.861374 | 0.577023 | 1.28585  | 0.46538  |
| POLR1B   | 0.991364 | 0.656037 | 1.498088 | 0.967155 |
| CCDC93   | 0.930034 | 0.601746 | 1.437423 | 0.744029 |
| PSD4     | 1.657201 | 1.085879 | 2.529116 | 0.019183 |
| SLC25A23 | 1.032057 | 0.855632 | 1.24486  | 0.74148  |
| PSPN     | 0.66519  | 0.385453 | 1.147941 | 0.14309  |
| GTF2F1   | 1.170568 | 0.718019 | 1.908348 | 0.527676 |
| ALKBH7   | 0.98321  | 0.725431 | 1.332589 | 0.913084 |
| CLPP     | 1.622044 | 1.001774 | 2.626368 | 0.049163 |
| TNFSF9   | 1.161098 | 0.970321 | 1.389383 | 0.102893 |
| THOC2    | 0.823485 | 0.499521 | 1.357557 | 0.446391 |
| MED1     | 0.862669 | 0.586583 | 1.268698 | 0.452867 |
| RPL23    | 1.076011 | 0.699914 | 1.654205 | 0.738468 |
| ATG4C    | 0.990691 | 0.650601 | 1.508557 | 0.965229 |
| CD70     | 1.059304 | 0.918448 | 1.221763 | 0.428714 |
| C3       | 1.179865 | 0.899818 | 1.547071 | 0.231543 |
| SH2D3A   | 1.42709  | 1.024548 | 1.987789 | 0.035431 |
| TRIP10   | 1.153178 | 0.912968 | 1.456589 | 0.23173  |
| GPR108   | 1.483617 | 0.966139 | 2.278263 | 0.071458 |
| TNFSF14  | 1.246137 | 1.003324 | 1.547712 | 0.046594 |
| FOSB     | 0.866355 | 0.737246 | 1.018075 | 0.08144  |
| OPA3     | 1.702545 | 0.907994 | 3.19238  | 0.097107 |

|         |          |          |          |          |
|---------|----------|----------|----------|----------|
| SNRPD2  | 1.459863 | 0.812561 | 2.622818 | 0.205648 |
| RTN2    | 1.424409 | 1.120827 | 1.810217 | 0.003819 |
| EML2    | 1.404558 | 0.898    | 2.196863 | 0.136604 |
| VASP    | 1.555905 | 1.111932 | 2.177147 | 0.00991  |
| SYMPK   | 1.208219 | 0.720203 | 2.026921 | 0.473651 |
| SDCBP2  | 1.15733  | 0.635061 | 2.109108 | 0.633231 |
| PANK2   | 1.529208 | 0.826649 | 2.828864 | 0.175936 |
| GNRH2   | 0.875972 | 0.675975 | 1.13514  | 0.316632 |
| CD93    | 1.122973 | 0.996407 | 1.265616 | 0.057307 |
| GZF1    | 0.822082 | 0.515266 | 1.311592 | 0.411097 |
| NAPB    | 0.873934 | 0.545112 | 1.401108 | 0.5758   |
| CENPB   | 2.008647 | 1.295861 | 3.113501 | 0.001815 |
| PSMF1   | 2.637605 | 1.395432 | 4.985521 | 0.002829 |
| DTD1    | 2.059578 | 1.305609 | 3.248954 | 0.001893 |
| RBCK1   | 1.572934 | 1.015601 | 2.436117 | 0.042426 |
| TMX4    | 0.610639 | 0.428568 | 0.870063 | 0.006324 |
| STK35   | 1.295558 | 0.775388 | 2.164685 | 0.322825 |
| SNRPB   | 1.442822 | 0.983764 | 2.116091 | 0.060629 |
| NRSN2   | 1.062726 | 0.827491 | 1.364832 | 0.633658 |
| RRBP1   | 1.328913 | 0.908067 | 1.944801 | 0.143302 |
| BMP2    | 1.610914 | 1.178413 | 2.202153 | 0.002797 |
| ZNF133  | 1.394853 | 0.923405 | 2.106999 | 0.113806 |
| MKKS    | 1.171456 | 0.705435 | 1.945339 | 0.54085  |
| BFSP1   | 2.367292 | 1.36543  | 4.104254 | 0.002145 |
| DSTN    | 1.194576 | 0.808296 | 1.765457 | 0.372348 |
| SNRPB2  | 1.6849   | 0.996436 | 2.849042 | 0.051578 |
| TBC1D20 | 0.86853  | 0.528881 | 1.426303 | 0.57757  |
| ITPA    | 2.337501 | 1.272946 | 4.292336 | 0.006177 |
| MCM8    | 1.167355 | 0.772765 | 1.76343  | 0.462217 |
| FAM110A | 1.461167 | 1.094333 | 1.950968 | 0.010137 |
| SIRPD   | 1.109322 | 0.973516 | 1.264072 | 0.119442 |
| MRPS26  | 1.321469 | 0.884969 | 1.973269 | 0.17301  |
| S1PR4   | 0.973429 | 0.695555 | 1.362314 | 0.875217 |
| NCLN    | 1.011558 | 0.735642 | 1.390961 | 0.943624 |
| HNRNPR  | 1.007892 | 0.586524 | 1.731977 | 0.977297 |
| ZNF436  | 0.948599 | 0.644853 | 1.395419 | 0.788725 |
| MAX     | 0.537093 | 0.330934 | 0.87168  | 0.011876 |
| ARMCX5  | 0.90706  | 0.575485 | 1.429677 | 0.674341 |
| MMP24   | 0.848482 | 0.576972 | 1.247758 | 0.4037   |
| NECAB3  | 0.850731 | 0.61315  | 1.180368 | 0.333287 |
| ID1     | 1.219174 | 1.028076 | 1.445794 | 0.022709 |
| RALY    | 1.146127 | 0.700292 | 1.8758   | 0.587397 |
| DYNLRB1 | 1.500334 | 0.816946 | 2.755388 | 0.190851 |
| EIF2S2  | 1.215679 | 0.707799 | 2.087989 | 0.479139 |
| ERGIC3  | 1.078298 | 0.674214 | 1.724566 | 0.753039 |
| ROMO1   | 1.327008 | 0.937959 | 1.87743  | 0.110006 |
| CEP250  | 1.101259 | 0.682636 | 1.776601 | 0.692629 |
| PLAGL2  | 1.070391 | 0.679059 | 1.68724  | 0.769542 |
| AMOT    | 1.076651 | 0.872249 | 1.328952 | 0.491737 |
| TMEM115 | 1.821926 | 1.147953 | 2.891592 | 0.010914 |
| PSMB2   | 2.485682 | 1.272495 | 4.855514 | 0.007691 |
| UROD    | 1.453785 | 1.085805 | 1.946474 | 0.011977 |
| ST3GAL3 | 0.619465 | 0.432334 | 0.887595 | 0.009061 |
| TMEM53  | 1.00951  | 0.694333 | 1.467755 | 0.960468 |
| HECTD3  | 1.841928 | 1.188109 | 2.855544 | 0.006325 |
| KLC1    | 0.935265 | 0.587317 | 1.48935  | 0.777999 |
| XRCC3   | 1.200304 | 0.835829 | 1.723714 | 0.322778 |
| TUBGCP3 | 0.781658 | 0.484357 | 1.261445 | 0.313064 |

|         |          |          |          |          |
|---------|----------|----------|----------|----------|
| MCF2L   | 0.733339 | 0.526274 | 1.021875 | 0.066931 |
| PCID2   | 1.023918 | 0.629119 | 1.66647  | 0.924225 |
| PROZ    | 1.091249 | 0.772974 | 1.540574 | 0.619663 |
| LRFN3   | 0.904126 | 0.706679 | 1.156739 | 0.422712 |
| CAPNS1  | 1.733045 | 1.178812 | 2.547858 | 0.005164 |
| PDCD2L  | 1.418302 | 0.888089 | 2.265066 | 0.143447 |
| RBM42   | 1.712134 | 1.111983 | 2.636194 | 0.014607 |
| KIRREL2 | 1.0701   | 0.717588 | 1.595782 | 0.739661 |
| UBA2    | 1.064971 | 0.672211 | 1.687211 | 0.7886   |
| FFAR2   | 1.252839 | 1.066263 | 1.472062 | 0.006148 |
| HCST    | 1.258413 | 1.016984 | 1.557156 | 0.034436 |
| FFAR1   | 1.305108 | 0.737506 | 2.309552 | 0.360505 |
| COX6B1  | 1.894461 | 1.180228 | 3.040923 | 0.008138 |
| THRA    | 0.682327 | 0.445501 | 1.045049 | 0.078853 |
| CCR7    | 1.032478 | 0.843988 | 1.263065 | 0.755978 |
| NR1D1   | 1.309345 | 0.921813 | 1.859796 | 0.132251 |
| FRMD8   | 1.525445 | 1.060351 | 2.194539 | 0.02286  |
| PRDX5   | 2.040855 | 1.383018 | 3.011594 | 0.000326 |
| BCL2L12 | 1.195531 | 0.767065 | 1.863329 | 0.430253 |
| IRF3    | 1.435845 | 0.897502 | 2.297098 | 0.131323 |
| PRMT1   | 1.127871 | 0.778683 | 1.633646 | 0.524393 |
| RRAS    | 1.279221 | 1.056149 | 1.549409 | 0.011778 |
| PRRG2   | 1.783074 | 1.046924 | 3.036852 | 0.033275 |
| SCAF1   | 1.394454 | 0.922429 | 2.108022 | 0.114795 |
| PRR12   | 1.075353 | 0.710654 | 1.62721  | 0.73103  |
| TSKS    | 1.021225 | 0.842558 | 1.237779 | 0.830509 |
| FLRT1   | 0.962346 | 0.673302 | 1.375474 | 0.833191 |
| ASL     | 1.080677 | 0.783873 | 1.48986  | 0.63579  |
| SBDS    | 1.18396  | 0.811316 | 1.727761 | 0.381212 |
| CSN1S1  | 1.057537 | 0.867197 | 1.289655 | 0.580562 |
| STAT5A  | 0.971934 | 0.704289 | 1.341289 | 0.862475 |
| WNK4    | 0.729993 | 0.365242 | 1.459006 | 0.37305  |
| BECN1   | 1.204219 | 0.71189  | 2.037031 | 0.488383 |
| PRKCG   | 1.255483 | 0.76067  | 2.07217  | 0.373493 |
| TRAP1   | 1.602601 | 1.071925 | 2.395999 | 0.021536 |
| GLIS2   | 0.536788 | 0.319798 | 0.901009 | 0.01855  |
| DNAJC8  | 3.808824 | 1.910772 | 7.592293 | 0.000145 |
| AHDC1   | 1.015898 | 0.800801 | 1.288771 | 0.896613 |
| IFI6    | 1.203912 | 1.029697 | 1.407604 | 0.01997  |
| ZNF384  | 1.213493 | 0.72897  | 2.020061 | 0.456761 |
| EMG1    | 1.78126  | 0.77556  | 4.091094 | 0.173564 |
| UXT     | 1.119402 | 0.663029 | 1.889904 | 0.672942 |
| CFP     | 1.111587 | 0.913239 | 1.353015 | 0.291459 |
| ELK1    | 1.282326 | 0.812114 | 2.024789 | 0.285972 |
| TIMM17B | 1.63351  | 1.04521  | 2.552936 | 0.031236 |
| KTN1    | 0.821779 | 0.53494  | 1.262422 | 0.3702   |
| RHOJ    | 0.881754 | 0.439277 | 1.769931 | 0.723355 |
| DLGAP5  | 0.913748 | 0.723494 | 1.154033 | 0.448902 |
| HSPA2   | 1.521071 | 1.048167 | 2.207337 | 0.027274 |
| ZBTB1   | 0.957876 | 0.601341 | 1.525803 | 0.856226 |
| TRMT5   | 0.910252 | 0.620043 | 1.336293 | 0.6312   |
| SGPP1   | 0.955493 | 0.819968 | 1.113417 | 0.559644 |
| PLEKHG3 | 0.892441 | 0.753658 | 1.05678  | 0.186981 |
| PZP     | 1.265075 | 1.014944 | 1.576851 | 0.036444 |
| RHOT1   | 0.703962 | 0.450056 | 1.101113 | 0.12406  |
| EVI2A   | 1.001516 | 0.777747 | 1.289668 | 0.990629 |
| OMG     | 0.667145 | 0.481356 | 0.924642 | 0.015081 |
| AIF1L   | 0.937646 | 0.832942 | 1.055513 | 0.286564 |

|         |          |          |          |          |
|---------|----------|----------|----------|----------|
| FAM78A  | 1.556534 | 1.034949 | 2.340984 | 0.033591 |
| NUP214  | 1.141024 | 0.600562 | 2.167864 | 0.687041 |
| CTAG2   | 1.249158 | 0.862292 | 1.809592 | 0.239411 |
| AVPR2   | 1.328807 | 1.051685 | 1.678951 | 0.017207 |
| SLC10A3 | 1.570104 | 1.114236 | 2.212481 | 0.009934 |
| MAP2K2  | 1.452808 | 0.980573 | 2.152468 | 0.062582 |
| HNRNPH2 | 1.393232 | 0.84355  | 2.301103 | 0.195188 |
| ARMCX1  | 0.94044  | 0.784245 | 1.127744 | 0.507552 |
| TIMM8A  | 0.929625 | 0.526646 | 1.640957 | 0.801278 |
| ZC4H2   | 0.936593 | 0.688698 | 1.273718 | 0.676239 |
| CANX    | 0.64119  | 0.440595 | 0.933111 | 0.020254 |
| IPPK    | 0.920523 | 0.51828  | 1.634951 | 0.777513 |
| ZNF484  | 0.834282 | 0.556775 | 1.250103 | 0.379887 |
| OMD     | 0.802982 | 0.612409 | 1.052858 | 0.112435 |
| FGD3    | 1.283203 | 0.906379 | 1.816689 | 0.159784 |
| HIVEP3  | 1.44894  | 1.131903 | 1.854776 | 0.003246 |
| PPCS    | 2.156832 | 1.079853 | 4.307922 | 0.029435 |
| BCL11B  | 0.908315 | 0.733444 | 1.124879 | 0.378102 |
| COX7C   | 1.053936 | 0.632782 | 1.755392 | 0.840058 |
| TRAF2   | 1.119212 | 0.729574 | 1.716942 | 0.605962 |
| ABHD8   | 1.468194 | 1.038174 | 2.076333 | 0.029869 |
| ATP13A4 | 0.897761 | 0.595134 | 1.354276 | 0.607134 |
| HELB    | 0.767185 | 0.555561 | 1.05942  | 0.107521 |
| RAP1B   | 0.80919  | 0.498558 | 1.313365 | 0.391548 |
| BEST3   | 0.758394 | 0.534843 | 1.075383 | 0.120643 |
| RAB3IP  | 1.009136 | 0.767862 | 1.326223 | 0.947986 |
| PTPRB   | 1.001802 | 0.767798 | 1.307123 | 0.989418 |
| DYRK2   | 0.863263 | 0.573365 | 1.299736 | 0.481266 |
| YEATS4  | 1.134491 | 0.719401 | 1.789084 | 0.587178 |
| TAS2R3  | 0.737674 | 0.581606 | 0.935621 | 0.01212  |
| TAS2R4  | 0.707724 | 0.536899 | 0.9329   | 0.014176 |
| TAS2R5  | 0.72951  | 0.558171 | 0.953444 | 0.020943 |
| LRR61   | 1.267521 | 1.042265 | 1.541458 | 0.017567 |
| IDUA    | 0.982383 | 0.759863 | 1.270068 | 0.892114 |
| FGFRL1  | 0.942472 | 0.801218 | 1.108629 | 0.4745   |
| TMEM175 | 1.231801 | 0.891744 | 1.701536 | 0.205932 |
| PIN1    | 1.347631 | 0.832392 | 2.181798 | 0.224869 |
| FBXL12  | 1.620345 | 0.94977  | 2.764373 | 0.076582 |
| UBR4    | 1.039514 | 0.728123 | 1.484076 | 0.831067 |
| HP1BP3  | 0.852606 | 0.469939 | 1.546875 | 0.599826 |
| SIN3B   | 1.230725 | 0.828984 | 1.827158 | 0.303149 |
| SLC35E1 | 0.942824 | 0.537219 | 1.654666 | 0.837452 |
| EPS15L1 | 0.949498 | 0.582394 | 1.548003 | 0.835388 |
| KLF2    | 1.176509 | 0.985176 | 1.405002 | 0.072648 |
| F2RL3   | 1.306785 | 1.019171 | 1.675564 | 0.034885 |
| GFER    | 1.273175 | 0.834333 | 1.942839 | 0.262708 |
| SYNGR3  | 1.224255 | 0.634617 | 2.361739 | 0.54615  |
| PKMYT1  | 1.145071 | 0.869147 | 1.508592 | 0.335544 |
| WFIKN1  | 0.712148 | 0.478858 | 1.059091 | 0.093651 |
| WDR24   | 1.126317 | 0.803266 | 1.57929  | 0.490364 |
| FBXL16  | 0.893777 | 0.602303 | 1.326305 | 0.577083 |
| CHTF18  | 1.133322 | 0.850659 | 1.50991  | 0.392555 |
| GNG13   | 1.574158 | 0.852512 | 2.906672 | 0.147055 |
| MACF1   | 0.861765 | 0.640603 | 1.15928  | 0.325509 |
| SMARCA4 | 1.097238 | 0.688719 | 1.748073 | 0.696143 |
| TICAM1  | 1.668499 | 1.208024 | 2.304497 | 0.00189  |
| IL17B   | 1.224781 | 0.740773 | 2.025031 | 0.429323 |
| TUBA4A  | 1.219527 | 1.032537 | 1.44038  | 0.019439 |

|          |          |          |          |          |
|----------|----------|----------|----------|----------|
| VIL1     | 1.026081 | 0.373808 | 2.816535 | 0.960143 |
| AAMP     | 1.71985  | 0.963841 | 3.068851 | 0.06646  |
| PNKD     | 1.112906 | 0.785086 | 1.577611 | 0.547924 |
| TNFRSF19 | 0.855087 | 0.658759 | 1.109926 | 0.239469 |
| RNF6     | 1.07099  | 0.67306  | 1.704187 | 0.772284 |
| ECHS1    | 2.096824 | 1.341993 | 3.276225 | 0.001147 |
| AKAP9    | 0.5847   | 0.441157 | 0.774948 | 0.000189 |
| GNG11    | 1.168524 | 1.013718 | 1.346971 | 0.031725 |
| HIP1     | 1.380969 | 1.131734 | 1.685093 | 0.00148  |
| PTPN12   | 0.988552 | 0.703615 | 1.388879 | 0.947082 |
| POR      | 1.356929 | 0.998315 | 1.844365 | 0.051272 |
| FGL2     | 1.10052  | 0.987512 | 1.22646  | 0.08316  |
| STYXL1   | 0.970125 | 0.599034 | 1.571102 | 0.901866 |
| STEAP4   | 1.087805 | 0.843059 | 1.403602 | 0.517512 |
| GNAI1    | 1.060535 | 0.888485 | 1.265902 | 0.51519  |
| PEX1     | 0.485701 | 0.322157 | 0.732268 | 0.000566 |
| CASD1    | 0.613795 | 0.431026 | 0.874063 | 0.006804 |
| ZNF780B  | 0.769783 | 0.569156 | 1.041131 | 0.089446 |
| LRFN1    | 0.937285 | 0.680087 | 1.29175  | 0.69229  |
| ZFP36    | 1.161752 | 0.938483 | 1.438139 | 0.168546 |
| SRD5A3   | 0.72502  | 0.483984 | 1.086099 | 0.118896 |
| SPINK2   | 1.181733 | 1.067307 | 1.308426 | 0.001311 |
| PAICS    | 0.992775 | 0.723732 | 1.361834 | 0.964137 |
| KDR      | 0.844586 | 0.58394  | 1.221573 | 0.369692 |
| PPAT     | 1.023073 | 0.722633 | 1.448423 | 0.897677 |
| TUBGCP6  | 1.069041 | 0.781298 | 1.462756 | 0.676456 |
| ADM2     | 0.835771 | 0.650331 | 1.074089 | 0.161041 |
| DGCR6L   | 1.313683 | 0.943886 | 1.828358 | 0.105753 |
| DGCR8    | 0.985505 | 0.633594 | 1.532875 | 0.948347 |
| ASPHD2   | 1.251701 | 0.923201 | 1.697089 | 0.148325 |
| VPREB3   | 1.135423 | 0.946123 | 1.362598 | 0.172311 |
| SDF2L1   | 1.019513 | 0.798306 | 1.302016 | 0.876931 |
| YWHAH    | 1.815401 | 1.153845 | 2.856261 | 0.009914 |
| RFPL2    | 0.945197 | 0.551544 | 1.61981  | 0.837514 |
| GNAZ     | 1.362694 | 1.069628 | 1.736058 | 0.012253 |
| MGAT3    | 0.908936 | 0.757529 | 1.090605 | 0.304406 |
| ADORA2A  | 0.801111 | 0.480721 | 1.335031 | 0.394749 |
| ATF4     | 0.956716 | 0.633021 | 1.445934 | 0.833678 |
| A4GALT   | 0.991337 | 0.829989 | 1.18405  | 0.923522 |
| CDC42EP1 | 1.236429 | 1.055986 | 1.447706 | 0.00837  |
| APOL3    | 1.245527 | 1.025377 | 1.512945 | 0.026933 |
| TPST2    | 1.389544 | 0.978502 | 1.973253 | 0.065988 |
| BAIAP2L2 | 1.432915 | 1.063036 | 1.931492 | 0.018214 |
| MPST     | 0.973483 | 0.654073 | 1.448874 | 0.894622 |
| GALR3    | 0.831185 | 0.527191 | 1.310472 | 0.426042 |
| TST      | 1.150529 | 0.873104 | 1.516104 | 0.31923  |
| IGLL1    | 0.931472 | 0.841108 | 1.031545 | 0.172739 |
| APOL2    | 1.285355 | 0.901405 | 1.832848 | 0.16556  |
| RAC2     | 2.203807 | 1.51852  | 3.198355 | 3.21E-05 |
| LIF      | 1.156233 | 0.898812 | 1.487381 | 0.258587 |
| APOBEC3/ | 1.073602 | 0.958076 | 1.203058 | 0.221463 |
| APOBEC3F | 1.30344  | 0.90274  | 1.881999 | 0.15736  |
| RIBC2    | 1.167991 | 0.901653 | 1.513004 | 0.239607 |
| KRT17    | 0.868201 | 0.737692 | 1.021798 | 0.089035 |
| DOCK4    | 0.742712 | 0.550305 | 1.002393 | 0.051855 |
| POT1     | 0.677428 | 0.419773 | 1.093231 | 0.11073  |
| ATP6V1F  | 1.452887 | 1.017149 | 2.075292 | 0.040031 |
| LSM8     | 0.728281 | 0.450807 | 1.176541 | 0.195104 |

|          |          |          |          |          |
|----------|----------|----------|----------|----------|
| PRKRIP1  | 0.886828 | 0.548459 | 1.433954 | 0.624229 |
| VGFB     | 1.067567 | 0.603079 | 1.889799 | 0.822455 |
| PODXL    | 0.913312 | 0.659376 | 1.265042 | 0.585386 |
| MKLN1    | 0.713922 | 0.501826 | 1.015658 | 0.060988 |
| DNAJB9   | 0.648492 | 0.449167 | 0.93627  | 0.020811 |
| FLNC     | 0.682487 | 0.495352 | 0.94032  | 0.019475 |
| LRRC4    | 0.739815 | 0.550435 | 0.994354 | 0.045771 |
| CALU     | 0.71372  | 0.49412  | 1.030917 | 0.072229 |
| CCDC136  | 1.07615  | 0.90891  | 1.274162 | 0.394413 |
| SMO      | 0.822564 | 0.683122 | 0.99047  | 0.039302 |
| IRF5     | 1.358798 | 1.032397 | 1.788395 | 0.028711 |
| LRRC17   | 0.868967 | 0.601614 | 1.255129 | 0.454056 |
| KLHDC10  | 0.683613 | 0.448637 | 1.04166  | 0.076723 |
| NDUFA5   | 0.644093 | 0.389465 | 1.065194 | 0.086546 |
| OPN1SW   | 0.719148 | 0.431972 | 1.197239 | 0.204889 |
| MRPS12   | 1.959275 | 1.262601 | 3.040358 | 0.002699 |
| MYO1B    | 1.06721  | 0.864351 | 1.317679 | 0.545358 |
| MTX2     | 0.90628  | 0.562529 | 1.46009  | 0.685896 |
| GAD1     | 0.973648 | 0.735718 | 1.288526 | 0.851821 |
| OSGEPL1  | 0.783436 | 0.509832 | 1.203871 | 0.265502 |
| ORMDL1   | 1.040233 | 0.62734  | 1.72488  | 0.878496 |
| HAT1     | 1.413258 | 0.844714 | 2.364467 | 0.187743 |
| HERC2    | 0.909238 | 0.652473 | 1.267047 | 0.574128 |
| SNRPN    | 0.997004 | 0.795472 | 1.249594 | 0.979225 |
| PSMG2    | 0.898494 | 0.439126 | 1.838407 | 0.769505 |
| TWSG1    | 0.980268 | 0.714472 | 1.344945 | 0.901713 |
| ARHGAP21 | 1.199904 | 1.018588 | 1.413494 | 0.029234 |
| WDFY4    | 1.328191 | 0.995109 | 1.772762 | 0.05402  |
| EIF2AK4  | 1.487539 | 0.916052 | 2.415555 | 0.108388 |
| MYO5C    | 0.932512 | 0.809866 | 1.073733 | 0.331465 |
| CGNL1    | 1.331196 | 0.941086 | 1.88302  | 0.105922 |
| TMOD2    | 0.975828 | 0.780016 | 1.220796 | 0.830451 |
| TTBK2    | 0.789177 | 0.509036 | 1.22349  | 0.289903 |
| ELL3     | 0.604231 | 0.303209 | 1.204103 | 0.152137 |
| INO80    | 1.043446 | 0.587731 | 1.852513 | 0.884542 |
| DLL4     | 0.675937 | 0.281282 | 1.624318 | 0.381276 |
| ALDH1A2  | 1.398358 | 0.754834 | 2.590511 | 0.286479 |
| IVD      | 1.129979 | 0.729342 | 1.750693 | 0.584342 |
| DUT      | 1.229247 | 0.80763  | 1.870967 | 0.335513 |
| CHAC1    | 1.317869 | 1.000854 | 1.735295 | 0.049293 |
| CLN6     | 0.798256 | 0.486855 | 1.308836 | 0.371777 |
| ARPP19   | 1.134287 | 0.662109 | 1.943196 | 0.646406 |
| VPS13C   | 0.691057 | 0.506563 | 0.942745 | 0.019698 |
| LOXL1    | 1.036837 | 0.844029 | 1.27369  | 0.730384 |
| ANAPC13  | 1.347515 | 0.792414 | 2.291474 | 0.270875 |
| MBD4     | 1.051616 | 0.616873 | 1.792744 | 0.853291 |
| COPB1    | 0.915754 | 0.565753 | 1.48228  | 0.720214 |
| PSMA1    | 0.87379  | 0.47392  | 1.611048 | 0.665585 |
| SUMF2    | 0.937577 | 0.582151 | 1.510005 | 0.790943 |
| PALLD    | 1.149839 | 0.869367 | 1.520797 | 0.327731 |
| SPCS3    | 0.677029 | 0.404999 | 1.131775 | 0.136807 |
| MYOD1    | 0.175737 | 0.001177 | 26.22842 | 0.495985 |
| SERGEF   | 1.097814 | 0.658245 | 1.830921 | 0.720653 |
| TPH1     | 1.119619 | 0.721524 | 1.737361 | 0.61425  |
| E2F8     | 1.057063 | 0.806826 | 1.384912 | 0.687221 |
| DCTD     | 0.930583 | 0.522046 | 1.658828 | 0.807282 |
| SOX15    | 0.91408  | 0.658168 | 1.269496 | 0.591907 |
| RPAIN    | 0.648485 | 0.408851 | 1.028572 | 0.065729 |

|          |          |          |          |          |
|----------|----------|----------|----------|----------|
| USP6     | 0.777761 | 0.598252 | 1.011133 | 0.060481 |
| SHBG     | 0.657617 | 0.351426 | 1.230586 | 0.189867 |
| PLD2     | 1.180981 | 0.989065 | 1.410138 | 0.065997 |
| CD68     | 1.364245 | 0.888399 | 2.094965 | 0.155826 |
| TXNDC17  | 1.250839 | 0.783904 | 1.995906 | 0.347853 |
| ATP1B2   | 0.953723 | 0.801459 | 1.134914 | 0.593404 |
| FXR2     | 1.042937 | 0.631148 | 1.723397 | 0.869686 |
| KIF1C    | 1.155089 | 0.903226 | 1.477184 | 0.250598 |
| MPDU1    | 1.772236 | 1.147057 | 2.738155 | 0.009935 |
| PHF20L1  | 0.85131  | 0.489126 | 1.481682 | 0.569114 |
| LRRC6    | 1.003291 | 0.682404 | 1.475071 | 0.986668 |
| CCNT1    | 0.868454 | 0.589372 | 1.279688 | 0.47579  |
| PUS7L    | 0.766129 | 0.514177 | 1.141539 | 0.190418 |
| KRI1     | 1.663865 | 1.087762 | 2.545084 | 0.01888  |
| ILF3     | 0.882653 | 0.571165 | 1.364014 | 0.574061 |
| SLC44A2  | 1.126249 | 0.904564 | 1.402263 | 0.287739 |
| CDKN2D   | 1.28051  | 1.001657 | 1.636991 | 0.048475 |
| MTUS1    | 1.769724 | 0.876135 | 3.574703 | 0.111537 |
| SIGLEC9  | 1.100103 | 0.985151 | 1.228469 | 0.090212 |
| NGDN     | 0.956394 | 0.564886 | 1.619248 | 0.868189 |
| RIPK3    | 1.416064 | 1.055978 | 1.898938 | 0.020136 |
| ADCY4    | 1.185363 | 0.968998 | 1.45004  | 0.098188 |
| RAB2B    | 0.756574 | 0.391594 | 1.461728 | 0.406431 |
| BCL2L2   | 1.063456 | 0.598302 | 1.890249 | 0.833943 |
| PARP2    | 1.474066 | 0.860509 | 2.525099 | 0.157679 |
| HEATR5A  | 0.559881 | 0.379532 | 0.825931 | 0.003455 |
| SNX6     | 1.011058 | 0.676967 | 1.510027 | 0.957147 |
| EAPP     | 1.340749 | 0.72844  | 2.467751 | 0.346174 |
| NRL      | 1.262773 | 0.562203 | 2.836333 | 0.572007 |
| RNASE1   | 1.098123 | 0.952086 | 1.266562 | 0.198586 |
| NEDD8    | 2.31643  | 1.204353 | 4.45538  | 0.011831 |
| DAD1     | 1.015649 | 0.656732 | 1.570721 | 0.944352 |
| TEP1     | 1.225885 | 0.850009 | 1.767972 | 0.275658 |
| EPB41L4A | 1.307857 | 0.660408 | 2.590049 | 0.441384 |
| REEP5    | 0.687829 | 0.530567 | 0.891703 | 0.004723 |
| ITFG1    | 0.646572 | 0.377819 | 1.106495 | 0.111656 |
| QRICH2   | 0.967077 | 0.675143 | 1.385243 | 0.85512  |
| FOXJ1    | 1.154456 | 0.643662 | 2.070604 | 0.629905 |
| SEC14L1  | 1.56673  | 1.047803 | 2.342657 | 0.028709 |
| RHBDF2   | 1.510777 | 1.214145 | 1.87988  | 0.000216 |
| AANAT    | 1.321353 | 1.020391 | 1.711083 | 0.034598 |
| ARHGEF6  | 0.752496 | 0.542914 | 1.042983 | 0.087768 |
| MAP7D3   | 1.250326 | 0.843447 | 1.853484 | 0.266017 |
| ASH2L    | 1.30641  | 0.742302 | 2.29921  | 0.354065 |
| CHRNA10  | 0.797686 | 0.535366 | 1.188539 | 0.266566 |
| CDKN1C   | 0.917508 | 0.771436 | 1.091239 | 0.330508 |
| RPS4Y1   | 0.994885 | 0.940065 | 1.052903 | 0.859256 |
| KLF16    | 1.226492 | 0.866855 | 1.735332 | 0.248906 |
| DOHH     | 1.032322 | 0.754378 | 1.412671 | 0.842447 |
| SHC2     | 0.78578  | 0.490671 | 1.258378 | 0.315666 |
| LBP      | 0.967694 | 0.815418 | 1.148407 | 0.706972 |
| CBFA2T3  | 0.88581  | 0.682353 | 1.149932 | 0.362457 |
| GAMT     | 1.14826  | 0.884962 | 1.489897 | 0.29819  |
| PHF10    | 0.722937 | 0.432043 | 1.209691 | 0.216757 |
| PRRG3    | 0.229551 | 0.023525 | 2.239853 | 0.205459 |
| STARD8   | 1.310653 | 1.07112  | 1.603751 | 0.008609 |
| GDPD2    | 2.398509 | 1.307929 | 4.398438 | 0.00469  |
| SAT1     | 1.276681 | 1.064601 | 1.531009 | 0.008405 |



|         |          |          |          |          |
|---------|----------|----------|----------|----------|
| GNL3L   | 1.253379 | 0.702409 | 2.236533 | 0.444635 |
| SH3BP4  | 1.035473 | 0.904056 | 1.185994 | 0.61469  |
| MOSPD2  | 0.985859 | 0.707587 | 1.373566 | 0.932924 |
| DOCK6   | 1.085604 | 0.880956 | 1.33779  | 0.440892 |
| ECSIT   | 1.555066 | 0.973107 | 2.485061 | 0.064894 |
| LDLR    | 1.322273 | 1.096421 | 1.594649 | 0.003464 |
| ELOF1   | 2.017057 | 1.201363 | 3.386586 | 0.007958 |
| TSPAN16 | 1.093109 | 0.8808   | 1.356595 | 0.419091 |
| PRKCSH  | 1.03966  | 0.695167 | 1.554867 | 0.849785 |
| CDC16   | 1.130816 | 0.711222 | 1.797954 | 0.603322 |
| APOE    | 0.990314 | 0.850295 | 1.15339  | 0.900409 |
| TOMM40  | 1.505727 | 1.00905  | 2.24688  | 0.045062 |
| APOC1   | 1.07848  | 0.877792 | 1.32505  | 0.472023 |
| GADD45G | 1.336475 | 0.981207 | 1.820375 | 0.065823 |
| XPO7    | 1.061871 | 0.742284 | 1.519055 | 0.74245  |
| FAM98C  | 1.484189 | 0.994986 | 2.213917 | 0.05295  |
| SAFB2   | 0.926968 | 0.521611 | 1.647336 | 0.796021 |
| RPL36   | 1.225925 | 0.83314  | 1.80389  | 0.301312 |
| ATP8B3  | 0.9681   | 0.72246  | 1.297259 | 0.828124 |
| GTPBP3  | 1.199561 | 0.770473 | 1.867614 | 0.420496 |
| PLVAP   | 1.113981 | 0.922757 | 1.344833 | 0.26129  |
| BST2    | 1.477331 | 1.117313 | 1.953352 | 0.006175 |
| SLC27A1 | 0.805301 | 0.562654 | 1.152592 | 0.236543 |
| NSUN5   | 1.288089 | 0.847255 | 1.958294 | 0.236233 |
| USHBP1  | 0.816718 | 0.29654  | 2.249368 | 0.695293 |
| DDA1    | 1.534891 | 0.931131 | 2.530136 | 0.092927 |
| MRPL34  | 2.286455 | 1.375149 | 3.801679 | 0.001433 |
| PGLS    | 1.43549  | 0.930761 | 2.213921 | 0.101972 |
| LSM7    | 1.133227 | 0.773704 | 1.659812 | 0.520667 |
| TULP4   | 0.808437 | 0.638191 | 1.024098 | 0.077969 |
| SNX9    | 1.00191  | 0.821388 | 1.222107 | 0.984978 |
| RTN4IP1 | 1.240934 | 0.724951 | 2.124167 | 0.431214 |
| QRSL1   | 1.018116 | 0.616565 | 1.681185 | 0.944064 |
| RSPH3   | 0.980313 | 0.567394 | 1.693731 | 0.943184 |
| MLLT1   | 0.909156 | 0.605889 | 1.364217 | 0.645538 |
| FUT5    | 3.183425 | 0.291426 | 34.77444 | 0.3425   |
| ACTN4   | 1.536624 | 1.056455 | 2.235034 | 0.024624 |
| NDUFA10 | 0.893843 | 0.516756 | 1.546099 | 0.688118 |
| ARPC1B  | 1.053868 | 0.67604  | 1.642856 | 0.816832 |
| ZSWIM6  | 1.046374 | 0.779329 | 1.404924 | 0.763009 |
| FCHO1   | 1.231362 | 0.856104 | 1.771109 | 0.261769 |
| MAP1S   | 1.139496 | 0.811205 | 1.600645 | 0.451344 |
| KLHDC7B | 1.040385 | 0.823385 | 1.314575 | 0.7401   |
| PXDN    | 0.909664 | 0.815647 | 1.014517 | 0.088938 |
| SSBP4   | 1.616717 | 1.178682 | 2.21754  | 0.002886 |
| GDF15   | 1.188533 | 0.960046 | 1.471399 | 0.112822 |
| PGPEP1  | 1.427146 | 0.910081 | 2.237981 | 0.121264 |
| LSM4    | 2.583936 | 1.662605 | 4.015823 | 2.45E-05 |
| JUND    | 1.274295 | 0.972217 | 1.67023  | 0.079112 |
| HRC     | 1.826656 | 1.239576 | 2.691784 | 0.002322 |
| TRPM4   | 1.207777 | 1.004606 | 1.452038 | 0.044551 |
| SULT4A1 | 1.445026 | 0.964675 | 2.164563 | 0.074176 |
| ZNF557  | 1.067073 | 0.686312 | 1.659078 | 0.773116 |
| CRB3    | 2.13529  | 0.703724 | 6.479049 | 0.1804   |
| CAMSAP1 | 1.157414 | 0.734029 | 1.825007 | 0.529234 |
| UBAC1   | 1.381767 | 0.985709 | 1.936961 | 0.060596 |
| ZBTB46  | 1.232041 | 0.972632 | 1.560637 | 0.083645 |
| SAMD10  | 1.141351 | 0.866504 | 1.503377 | 0.346918 |

|         |          |          |          |          |
|---------|----------|----------|----------|----------|
| LSP1    | 1.365152 | 1.163424 | 1.601858 | 0.000136 |
| TNNT3   | 1.345178 | 1.114146 | 1.624117 | 0.002041 |
| TNNI2   | 1.343478 | 1.153778 | 1.564369 | 0.000144 |
| H19     | 1.379895 | 0.997719 | 1.908464 | 0.051635 |
| COL5A1  | 1.085876 | 0.955724 | 1.233752 | 0.20596  |
| ATXN10  | 0.956585 | 0.552297 | 1.656817 | 0.87416  |
| TUBGCP2 | 1.757253 | 1.119109 | 2.759283 | 0.014334 |
| CYP2E1  | 0.600013 | 0.444151 | 0.81057  | 0.000873 |
| PNPLA7  | 1.047715 | 0.813187 | 1.349883 | 0.718459 |
| HBZ     | 0.891194 | 0.50437  | 1.574689 | 0.691649 |
| PAK4    | 0.813932 | 0.54659  | 1.212033 | 0.310868 |
| MXN1    | 1.004099 | 0.7373   | 1.367442 | 0.979292 |
| ZNF337  | 0.827059 | 0.551986 | 1.239211 | 0.357379 |
| TAF4    | 0.72511  | 0.39263  | 1.339134 | 0.304438 |
| LAMA5   | 0.941858 | 0.753442 | 1.177391 | 0.59889  |
| OSBPL2  | 0.992207 | 0.551132 | 1.786278 | 0.979193 |
| ADRM1   | 1.123428 | 0.853562 | 1.478615 | 0.406352 |
| ASS1    | 0.832791 | 0.706354 | 0.981859 | 0.029416 |
| EXOSC2  | 1.03573  | 0.613637 | 1.748161 | 0.895422 |
| POMT1   | 0.88525  | 0.642064 | 1.220543 | 0.457004 |
| UCK1    | 1.796201 | 1.123859 | 2.870769 | 0.014364 |
| FIBCD1  | 0.563843 | 0.293662 | 1.082605 | 0.08516  |
| CHMP2A  | 1.796489 | 1.159668 | 2.783015 | 0.008709 |
| UBE2M   | 1.642714 | 1.035947 | 2.604871 | 0.03485  |
| TRIM28  | 1.17514  | 0.801435 | 1.723101 | 0.408552 |
| YIPF2   | 1.070497 | 0.764356 | 1.499254 | 0.691825 |
| ATG4D   | 1.203612 | 0.889093 | 1.629392 | 0.230425 |
| EIF2S3  | 0.936489 | 0.576252 | 1.521924 | 0.791126 |
| TMEM160 | 1.160793 | 0.848869 | 1.587335 | 0.350406 |
| ZC3H4   | 1.271275 | 0.683412 | 2.364811 | 0.448492 |
| NPAS1   | 0.896618 | 0.637099 | 1.26185  | 0.531364 |
| GMFG    | 1.359718 | 0.80879  | 2.285924 | 0.24633  |
| MAP3K10 | 1.186945 | 0.84518  | 1.66691  | 0.322589 |
| LRRC47  | 1.857997 | 1.061121 | 3.253309 | 0.030194 |
| SESN2   | 1.429712 | 1.067394 | 1.915015 | 0.016514 |
| SMPDL3B | 1.27685  | 1.030327 | 1.582356 | 0.025553 |
| MED18   | 1.619441 | 0.985384 | 2.661489 | 0.057188 |
| CLIP1   | 0.908301 | 0.571869 | 1.442657 | 0.683686 |
| CCDC62  | 0.95905  | 0.689909 | 1.333187 | 0.803519 |
| HIP1R   | 0.813735 | 0.652871 | 1.014236 | 0.066627 |
| ZNF317  | 1.369118 | 0.72523  | 2.584673 | 0.332528 |
| PPAN    | 1.052014 | 0.742591 | 1.490367 | 0.775397 |
| EIF3G   | 1.729731 | 1.069258 | 2.798173 | 0.02556  |
| ANGPTL6 | 1.014845 | 0.798941 | 1.289094 | 0.903897 |
| DNMT1   | 1.320759 | 0.844426 | 2.065785 | 0.222835 |
| ZNF426  | 0.937213 | 0.614464 | 1.429487 | 0.763372 |
| SLC6A8  | 0.908186 | 0.733592 | 1.124332 | 0.376628 |
| DKC1    | 1.082169 | 0.725703 | 1.61373  | 0.698507 |
| PLXNA3  | 0.941857 | 0.757826 | 1.170579 | 0.589168 |
| MPP1    | 1.43394  | 1.011572 | 2.03266  | 0.042909 |
| ZNF331  | 1.146935 | 0.805164 | 1.633778 | 0.447579 |
| ZNF236  | 0.674991 | 0.41586  | 1.09559  | 0.111713 |
| LRP3    | 0.966636 | 0.833843 | 1.120575 | 0.652664 |
| NOL11   | 0.900944 | 0.586811 | 1.38324  | 0.633464 |
| UBE4B   | 0.973958 | 0.613733 | 1.545614 | 0.910832 |
| CASZ1   | 1.122277 | 0.76707  | 1.641971 | 0.552403 |
| PKDREJ  | 0.924293 | 0.661559 | 1.291371 | 0.644525 |
| HABP4   | 1.024296 | 0.720936 | 1.455307 | 0.893429 |

|           |          |          |          |          |
|-----------|----------|----------|----------|----------|
| SLC35D2   | 1.142367 | 0.787099 | 1.657988 | 0.483721 |
| PRRG1     | 0.871207 | 0.663024 | 1.144757 | 0.322365 |
| UBA1      | 1.891203 | 1.189712 | 3.006314 | 0.007049 |
| PPIL4     | 0.942935 | 0.52272  | 1.700961 | 0.84523  |
| ULBP2     | 1.252362 | 0.805999 | 1.945923 | 0.316927 |
| AKAP12    | 0.665416 | 0.474765 | 0.932628 | 0.018035 |
| SYNE1     | 1.173931 | 0.875008 | 1.574973 | 0.284858 |
| ULBP3     | 1.642656 | 1.248275 | 2.161638 | 0.000395 |
| LATS1     | 0.836202 | 0.521138 | 1.341744 | 0.458409 |
| EPS8L1    | 1.391349 | 1.011059 | 1.914678 | 0.042613 |
| LILRB2    | 1.170131 | 1.058689 | 1.293304 | 0.002092 |
| TTLL9     | 1.790752 | 0.9252   | 3.466052 | 0.08377  |
| RBM39     | 0.627939 | 0.376405 | 1.047562 | 0.074747 |
| ZNF341    | 1.131112 | 0.695251 | 1.84022  | 0.619785 |
| GGT7      | 1.212075 | 0.982505 | 1.495286 | 0.072618 |
| ACSS2     | 1.214717 | 0.895983 | 1.646837 | 0.210336 |
| EDA2R     | 0.914942 | 0.770052 | 1.087094 | 0.312209 |
| ARHGEF9   | 1.045199 | 0.67551  | 1.617207 | 0.842654 |
| HIGD1B    | 0.633138 | 0.439426 | 0.912244 | 0.014172 |
| ATP6V1E1  | 2.007583 | 1.14412  | 3.522699 | 0.01513  |
| ZNF227    | 0.62952  | 0.410583 | 0.965201 | 0.033805 |
| ZNF428    | 1.053896 | 0.665313 | 1.669435 | 0.823015 |
| ZNF141    | 0.703052 | 0.508294 | 0.972433 | 0.033265 |
| CCL25     | 1.367375 | 1.06843  | 1.749965 | 0.012925 |
| COX4I1    | 1.49953  | 0.954991 | 2.354567 | 0.078422 |
| GINS2     | 1.230508 | 0.83842  | 1.805957 | 0.289303 |
| CHMP1A    | 1.564193 | 1.002549 | 2.44048  | 0.048703 |
| SH3BGRL   | 1.479005 | 0.950127 | 2.302276 | 0.083029 |
| COX7B     | 1.715793 | 0.997442 | 2.951497 | 0.051092 |
| F12       | 1.661622 | 1.325769 | 2.082555 | 1.04E-05 |
| PRR7      | 1.452125 | 1.176093 | 1.792942 | 0.000525 |
| NFATC1    | 1.400247 | 0.992535 | 1.975438 | 0.055201 |
| CAP1      | 1.979381 | 1.377672 | 2.843891 | 0.000222 |
| PPT1      | 1.312692 | 0.943519 | 1.826314 | 0.106335 |
| RAB11FIP4 | 1.286281 | 0.983911 | 1.681572 | 0.065573 |
| ABCB7     | 0.838293 | 0.501141 | 1.40227  | 0.501604 |
| TRAF3     | 1.460251 | 0.994599 | 2.143913 | 0.05332  |
| HAUS8     | 2.044524 | 1.145263 | 3.649886 | 0.015577 |
| MRPS25    | 1.072518 | 0.688088 | 1.671726 | 0.757209 |
| SH3BP5    | 1.306612 | 1.030565 | 1.6566   | 0.027202 |
| HACL1     | 0.706396 | 0.442355 | 1.128044 | 0.145546 |
| TBC1D5    | 0.923894 | 0.587413 | 1.45312  | 0.731912 |
| CAPN7     | 1.103768 | 0.667588 | 1.824935 | 0.70035  |
| RFTN1     | 1.672546 | 1.12728  | 2.481557 | 0.010615 |
| SLC6A6    | 1.459154 | 1.066691 | 1.996015 | 0.018086 |
| KCNC3     | 1.295416 | 1.081288 | 1.551947 | 0.004989 |
| NAPSA     | 0.968836 | 0.698772 | 1.343275 | 0.849391 |
| NAPSB     | 1.20706  | 1.075408 | 1.35483  | 0.001404 |
| NR1H2     | 1.663367 | 1.061559 | 2.606344 | 0.026373 |
| LRRC4B    | 0.863306 | 0.586397 | 1.270975 | 0.456359 |
| PDLIM4    | 0.617243 | 0.36683  | 1.038596 | 0.069167 |
| KIF3A     | 0.882446 | 0.595475 | 1.307714 | 0.533186 |
| MGAT1     | 1.505941 | 1.018846 | 2.225908 | 0.040013 |
| TUBG1     | 1.310384 | 0.926332 | 1.853661 | 0.126625 |
| PSME3     | 1.906326 | 1.069035 | 3.399401 | 0.028804 |
| RPL27     | 1.137355 | 0.717964 | 1.801728 | 0.583459 |
| PSMC3IP   | 1.10567  | 0.676758 | 1.806415 | 0.688371 |
| AOC3      | 1.110219 | 0.759194 | 1.623548 | 0.589743 |

|         |          |          |          |          |
|---------|----------|----------|----------|----------|
| ACLY    | 1.305336 | 0.79565  | 2.141522 | 0.291455 |
| VPS25   | 2.271835 | 1.301085 | 3.96687  | 0.003908 |
| RAMP2   | 0.934594 | 0.684402 | 1.276245 | 0.670455 |
| AOC2    | 1.182478 | 0.810082 | 1.726065 | 0.385093 |
| NDUFA2  | 1.804982 | 1.062078 | 3.067534 | 0.029069 |
| ANKHD1  | 0.462419 | 0.277267 | 0.771213 | 0.003122 |
| DIAPH1  | 0.930251 | 0.678077 | 1.276207 | 0.654034 |
| NDFIP1  | 1.452254 | 1.177724 | 1.790777 | 0.000483 |
| UBE2D2  | 1.27197  | 0.703178 | 2.300851 | 0.426323 |
| EXOC4   | 0.973255 | 0.594157 | 1.594234 | 0.914261 |
| ACAP3   | 1.158701 | 0.863206 | 1.55535  | 0.326769 |
| PPFIA1  | 0.931038 | 0.580645 | 1.492876 | 0.76676  |
| TMEM204 | 1.154957 | 0.927094 | 1.438825 | 0.198852 |
| KREMEN2 | 0.68967  | 0.461083 | 1.031581 | 0.070512 |
| THOC6   | 1.308695 | 0.87717  | 1.952509 | 0.187523 |
| TRAF7   | 1.409252 | 0.937667 | 2.118014 | 0.098872 |
| BARX1   | 0.694693 | 0.1573   | 3.068016 | 0.630733 |
| NINJ1   | 1.250666 | 1.047343 | 1.493461 | 0.013475 |
| CA6     | 1.043778 | 0.684371 | 1.591932 | 0.842301 |
| NPHP4   | 0.977596 | 0.696172 | 1.372786 | 0.895927 |
| MAP1B   | 1.052539 | 0.592502 | 1.869761 | 0.861348 |
| IL13RA1 | 1.116522 | 0.965173 | 1.291603 | 0.138072 |
| WDR44   | 1.276911 | 0.716208 | 2.276576 | 0.407349 |
| CKMT2   | 0.731133 | 0.543446 | 0.983641 | 0.038552 |
| ZCCHC9  | 1.007262 | 0.585334 | 1.733331 | 0.979157 |
| TOP2A   | 0.887167 | 0.720185 | 1.092867 | 0.260471 |
| STARD3  | 1.103819 | 0.649367 | 1.876313 | 0.715177 |
| RARA    | 1.26571  | 0.963327 | 1.66301  | 0.090699 |
| PPP1R1B | 0.835601 | 0.179169 | 3.897046 | 0.819172 |
| KHDRBS3 | 0.920172 | 0.679099 | 1.246824 | 0.591446 |
| CHD1L   | 0.791013 | 0.504586 | 1.240028 | 0.306748 |
| PEX11B  | 2.224803 | 1.045765 | 4.733137 | 0.037881 |
| FMO5    | 1.308199 | 0.952942 | 1.795897 | 0.096552 |
| PIAS3   | 0.972183 | 0.666123 | 1.418867 | 0.883725 |
| PRKAB2  | 1.123893 | 0.76933  | 1.641866 | 0.54587  |
| PDHA1   | 1.370105 | 0.774012 | 2.425269 | 0.279809 |
| RAI2    | 1.045121 | 0.193015 | 5.659023 | 0.959159 |
| MCCC2   | 1.162659 | 0.71389  | 1.893535 | 0.544763 |
| ZNF304  | 0.829198 | 0.578391 | 1.188762 | 0.308148 |
| ZSCAN5A | 0.667031 | 0.411856 | 1.080307 | 0.09977  |
| ZNF132  | 0.943508 | 0.678214 | 1.312574 | 0.729924 |
| CHSY1   | 0.684882 | 0.45866  | 1.022684 | 0.064269 |
| SNRPA1  | 1.070053 | 0.654971 | 1.748188 | 0.786895 |
| LLGL1   | 1.095195 | 0.793408 | 1.511772 | 0.58034  |
| THAP1   | 1.271627 | 0.759304 | 2.129627 | 0.361053 |
| ACTR10  | 1.851535 | 0.865041 | 3.96303  | 0.112611 |
| ABHD12B | 0.791357 | 0.614095 | 1.019786 | 0.070523 |
| GCH1    | 1.108884 | 0.919066 | 1.337906 | 0.280621 |
| LGALS3  | 1.094478 | 0.955488 | 1.253686 | 0.192627 |
| PODNL1  | 1.77662  | 1.114193 | 2.832882 | 0.01577  |
| DNAJB1  | 1.534849 | 0.895977 | 2.629266 | 0.118757 |
| ZSWIM4  | 0.747282 | 0.527114 | 1.059412 | 0.101867 |
| FBXW9   | 1.106675 | 0.801335 | 1.528361 | 0.538314 |
| RFX1    | 1.187525 | 0.787601 | 1.79052  | 0.412021 |
| ZNF20   | 0.533744 | 0.347574 | 0.819631 | 0.00412  |
| DCAF15  | 1.288575 | 0.865153 | 1.919229 | 0.212272 |
| CC2D1A  | 1.744126 | 1.138064 | 2.67294  | 0.010659 |
| TRIM21  | 1.594988 | 1.078589 | 2.358623 | 0.019336 |

|          |          |          |          |          |
|----------|----------|----------|----------|----------|
| SPATA6   | 1.002949 | 0.811699 | 1.239259 | 0.97824  |
| LRRRC41  | 1.184783 | 0.690527 | 2.032811 | 0.538166 |
| CCT6B    | 1.023055 | 0.647476 | 1.616496 | 0.922205 |
| DHX30    | 1.153334 | 0.707971 | 1.878861 | 0.566682 |
| RAF1     | 0.783149 | 0.523908 | 1.17067  | 0.233375 |
| PPARG    | 0.946633 | 0.819434 | 1.093577 | 0.456314 |
| NUP210   | 1.676635 | 1.268864 | 2.21545  | 0.000278 |
| FCRLA    | 1.128354 | 0.913297 | 1.394052 | 0.263003 |
| HSD17B7  | 1.365131 | 0.770768 | 2.417824 | 0.285875 |
| ENOSF1   | 0.797966 | 0.607691 | 1.047819 | 0.104404 |
| EMILIN2  | 0.937131 | 0.788114 | 1.114326 | 0.462425 |
| ARFIP2   | 1.342881 | 0.780164 | 2.311475 | 0.287323 |
| TRIM5    | 0.753193 | 0.490741 | 1.156006 | 0.194728 |
| CNGA4    | 1.519771 | 0.983992 | 2.347278 | 0.059133 |
| TRIM22   | 1.291762 | 0.883963 | 1.88769  | 0.185934 |
| RRP8     | 0.819632 | 0.481099 | 1.39638  | 0.464353 |
| EFR3A    | 1.346923 | 0.955573 | 1.898547 | 0.089038 |
| PTCD3    | 0.732581 | 0.473658 | 1.133041 | 0.161937 |
| IMMT     | 1.390406 | 0.766969 | 2.52061  | 0.277532 |
| MRPL35   | 1.190408 | 0.731825 | 1.936354 | 0.482572 |
| ILKAP    | 0.737218 | 0.39688  | 1.369406 | 0.334575 |
| PER2     | 0.961373 | 0.618792 | 1.493616 | 0.860892 |
| RAMP1    | 0.943941 | 0.839263 | 1.061674 | 0.336043 |
| SCLY     | 0.601895 | 0.378429 | 0.957319 | 0.032018 |
| PTPRE    | 1.11837  | 0.883338 | 1.415939 | 0.352678 |
| RAN      | 1.313326 | 0.827063 | 2.085483 | 0.248004 |
| PRKAA1   | 0.791786 | 0.493856 | 1.269449 | 0.332368 |
| CARD6    | 1.640661 | 1.091382 | 2.466385 | 0.017294 |
| INPP5K   | 1.451317 | 0.905792 | 2.325392 | 0.121481 |
| MYBBP1A  | 1.255085 | 0.889322 | 1.771281 | 0.196139 |
| RPA1     | 1.383456 | 0.896554 | 2.134787 | 0.142491 |
| SERPINF1 | 1.072448 | 0.87747  | 1.310751 | 0.494484 |
| UBE2G1   | 0.673196 | 0.370728 | 1.222439 | 0.193568 |
| EEFSEC   | 1.479779 | 0.946561 | 2.313371 | 0.085604 |
| TBC1D14  | 1.16019  | 0.800594 | 1.681303 | 0.432461 |
| TMEM128  | 0.816323 | 0.434687 | 1.53302  | 0.527918 |
| COQ3     | 1.199213 | 0.798995 | 1.799902 | 0.380569 |
| SEC61G   | 0.776498 | 0.498637 | 1.209192 | 0.262972 |
| LANCL2   | 1.615426 | 0.958923 | 2.721387 | 0.071493 |
| FIGNL1   | 0.940626 | 0.690554 | 1.281259 | 0.697883 |
| GRSF1    | 0.68588  | 0.405393 | 1.160433 | 0.15991  |
| ANKRD17  | 0.842073 | 0.527797 | 1.343484 | 0.470807 |
| UTP3     | 1.41123  | 0.872664 | 2.282172 | 0.160147 |
| ITGB4    | 0.792965 | 0.607042 | 1.035831 | 0.088809 |
| WBP2     | 1.426641 | 0.884143 | 2.302006 | 0.145518 |
| UNK      | 0.673923 | 0.408726 | 1.111191 | 0.121927 |
| TRIM47   | 1.017817 | 0.814945 | 1.271191 | 0.876263 |
| ZRANB2   | 0.768543 | 0.500601 | 1.179899 | 0.228736 |
| EIF5A    | 1.387656 | 0.922503 | 2.087351 | 0.115781 |
| KDM6B    | 1.021008 | 0.710959 | 1.466271 | 0.910357 |
| CLEC10A  | 1.033922 | 0.931657 | 1.147412 | 0.530148 |
| GUCY2D   | 0.976852 | 0.758473 | 1.258106 | 0.856042 |
| GPS2     | 1.097451 | 0.630512 | 1.910191 | 0.742263 |
| XAF1     | 0.999175 | 0.806988 | 1.237132 | 0.993957 |
| DLG4     | 1.109977 | 0.847221 | 1.454223 | 0.449028 |
| VPS13B   | 0.680038 | 0.459603 | 1.006197 | 0.053723 |
| MATN2    | 0.81095  | 0.549373 | 1.197074 | 0.291589 |
| REEP2    | 0.528182 | 0.27143  | 1.027799 | 0.060212 |

|          |          |          |          |          |
|----------|----------|----------|----------|----------|
| PCBD2    | 0.456056 | 0.284767 | 0.730378 | 0.001085 |
| SDF2     | 1.428894 | 0.697189 | 2.928529 | 0.329663 |
| FLOT2    | 1.348032 | 0.949296 | 1.914252 | 0.09509  |
| ERAL1    | 1.642553 | 0.893413 | 3.019859 | 0.110218 |
| PRMT7    | 1.216817 | 0.766837 | 1.930845 | 0.404836 |
| NIP7     | 1.084076 | 0.661111 | 1.77765  | 0.749023 |
| TERF2    | 2.147685 | 1.175025 | 3.925491 | 0.012987 |
| VPS4A    | 1.289144 | 0.69555  | 2.389321 | 0.419811 |
| HSPA12B  | 0.952498 | 0.717537 | 1.264398 | 0.736311 |
| BTBD3    | 1.231491 | 0.819264 | 1.851137 | 0.31667  |
| PCNA     | 1.358968 | 0.948501 | 1.947067 | 0.094567 |
| NXT1     | 1.208804 | 0.817386 | 1.787658 | 0.342165 |
| POLR3F   | 0.586458 | 0.309565 | 1.111018 | 0.101626 |
| RIN2     | 0.980427 | 0.814957 | 1.179493 | 0.833989 |
| PTPRA    | 2.05797  | 1.03248  | 4.102009 | 0.040287 |
| DAP3     | 1.160487 | 0.60779  | 2.215783 | 0.651957 |
| ARHGEF11 | 1.039311 | 0.906453 | 1.191642 | 0.580586 |
| FCRL2    | 1.010036 | 0.77041  | 1.324195 | 0.942386 |
| SYT11    | 1.395017 | 0.991913 | 1.961938 | 0.05571  |
| IGHMBP2  | 1.105297 | 0.702665 | 1.738638 | 0.664893 |
| ACY3     | 1.123214 | 0.999208 | 1.26261  | 0.051571 |
| MMACHC   | 1.630129 | 1.016414 | 2.614406 | 0.04261  |
| DPH2     | 1.418818 | 0.9009   | 2.234482 | 0.131143 |
| TOE1     | 1.543792 | 0.915442 | 2.603433 | 0.103394 |
| NASP     | 0.970982 | 0.628369 | 1.5004   | 0.894488 |
| MUTYH    | 1.241775 | 0.61701  | 2.499154 | 0.543973 |
| CTNBL1   | 1.283271 | 0.832385 | 1.978393 | 0.258775 |
| LPIN3    | 1.203385 | 0.858124 | 1.68756  | 0.283224 |
| ZSWIM3   | 1.316947 | 0.863078 | 2.009494 | 0.201608 |
| RBM38    | 1.182255 | 0.962967 | 1.45148  | 0.109719 |
| VSTM2L   | 1.202775 | 0.827561 | 1.748108 | 0.333135 |
| SERINC3  | 0.951361 | 0.583877 | 1.550135 | 0.841343 |
| PPP1R3D  | 1.274915 | 0.868571 | 1.871358 | 0.214839 |
| AP3B1    | 0.864762 | 0.550318 | 1.358876 | 0.528622 |
| ZBED3    | 0.877424 | 0.719066 | 1.070657 | 0.197862 |
| ANGPTL3  | 0.486349 | 0.301152 | 0.785434 | 0.003203 |
| FBXO44   | 1.198312 | 0.937079 | 1.53237  | 0.149309 |
| CASP9    | 1.881089 | 1.078067 | 3.282259 | 0.026107 |
| DCTN4    | 1.091466 | 0.722962 | 1.647802 | 0.67709  |
| PDE6A    | 1.297754 | 0.673302 | 2.501351 | 0.436287 |
| MTUS2    | 0.768585 | 0.60414  | 0.977791 | 0.032128 |
| ZMYM5    | 0.739443 | 0.423141 | 1.292184 | 0.289187 |
| USPL1    | 1.049898 | 0.612156 | 1.800662 | 0.859579 |
| XPO4     | 0.659567 | 0.41264  | 1.054257 | 0.082006 |
| POMP     | 1.790042 | 1.100847 | 2.910715 | 0.018909 |
| CDK8     | 0.623203 | 0.352541 | 1.101662 | 0.103764 |
| ALOX5AP  | 1.167622 | 1.02278  | 1.332975 | 0.021831 |
| WASF3    | 1.258454 | 0.874383 | 1.811228 | 0.215937 |
| GPR12    | 0.641464 | 0.485402 | 0.847703 | 0.001799 |
| MYH10    | 0.906458 | 0.712134 | 1.153809 | 0.424995 |
| PEMT     | 0.990862 | 0.738277 | 1.329862 | 0.951241 |
| SCO1     | 0.748789 | 0.424824 | 1.319805 | 0.317113 |
| MPRIP    | 0.869111 | 0.6246   | 1.209341 | 0.405252 |
| CHI3L1   | 0.949095 | 0.829821 | 1.085513 | 0.445771 |
| MYBPH    | 1.105297 | 0.939596 | 1.30022  | 0.227005 |
| PIK3C2B  | 1.027261 | 0.805077 | 1.310761 | 0.828756 |
| DSTYK    | 0.887008 | 0.578829 | 1.359267 | 0.58194  |
| CHIT1    | 1.057385 | 0.756193 | 1.478542 | 0.744268 |

|          |          |          |          |          |
|----------|----------|----------|----------|----------|
| SLC41A1  | 1.127156 | 0.951095 | 1.33581  | 0.167179 |
| LGR6     | 1.070675 | 0.87663  | 1.307674 | 0.503266 |
| TMCC2    | 0.92214  | 0.798851 | 1.064457 | 0.268321 |
| CCNA1    | 0.928216 | 0.840045 | 1.025641 | 0.143523 |
| COG6     | 0.636272 | 0.39544  | 1.023774 | 0.062442 |
| RXFP2    | 1.001051 | 0.891305 | 1.124309 | 0.985859 |
| EPST11   | 1.240681 | 1.067579 | 1.44185  | 0.00491  |
| RFXAP    | 1.144717 | 0.723122 | 1.81211  | 0.564135 |
| TPT1     | 0.793557 | 0.522866 | 1.204385 | 0.277347 |
| RFC3     | 1.213775 | 0.841709 | 1.750306 | 0.299591 |
| STARD13  | 1.134258 | 0.85274  | 1.508714 | 0.386756 |
| MORC4    | 1.105037 | 0.835038 | 1.462338 | 0.484709 |
| BEX2     | 1.153713 | 1.015273 | 1.311029 | 0.028352 |
| TCEAL4   | 0.927937 | 0.69603  | 1.237112 | 0.610229 |
| BEX1     | 1.032576 | 0.944783 | 1.128528 | 0.479508 |
| FAM104A  | 1.180081 | 0.726708 | 1.916301 | 0.503237 |
| SLC39A11 | 0.689261 | 0.526317 | 0.90265  | 0.006846 |
| EPHB2    | 1.131674 | 0.854864 | 1.498116 | 0.387426 |
| SRRM1    | 1.339207 | 0.769345 | 2.331174 | 0.301708 |
| BTBD2    | 1.197687 | 0.848464 | 1.690647 | 0.305056 |
| PRAM1    | 1.139631 | 0.912989 | 1.422535 | 0.24796  |
| ZNF414   | 1.424561 | 1.021448 | 1.986762 | 0.037069 |
| PDE6B    | 1.090096 | 0.733773 | 1.619451 | 0.669265 |
| HSPBP1   | 1.264723 | 0.867552 | 1.843721 | 0.222018 |
| CSNK1G2  | 1.098021 | 0.744576 | 1.619242 | 0.637062 |
| CNDP2    | 1.171925 | 0.846407 | 1.622634 | 0.339291 |
| MACROD1  | 1.142798 | 0.88882  | 1.46935  | 0.297929 |
| WDR74    | 1.363223 | 0.98581  | 1.885128 | 0.060993 |
| LGALS12  | 0.941754 | 0.841724 | 1.053671 | 0.294893 |
| RTN3     | 0.97538  | 0.588518 | 1.616545 | 0.922959 |
| MYH11    | 0.696174 | 0.487576 | 0.994015 | 0.046261 |
| MED10    | 1.780405 | 0.969293 | 3.270263 | 0.062967 |
| PDZD2    | 0.916493 | 0.695865 | 1.207072 | 0.534865 |
| MORC2    | 1.251971 | 0.738333 | 2.122933 | 0.404257 |
| MYO18B   | 0.981772 | 0.834834 | 1.154573 | 0.82401  |
| SLC2A11  | 1.041644 | 0.689765 | 1.573032 | 0.846175 |
| C1QTNF6  | 1.184819 | 0.888653 | 1.579689 | 0.247851 |
| FAM83F   | 0.704582 | 0.358842 | 1.383438 | 0.30909  |
| SEC14L4  | 0.878949 | 0.705701 | 1.09473  | 0.24935  |
| GIMAP6   | 1.198203 | 0.993702 | 1.44479  | 0.058252 |
| GIMAP4   | 1.03845  | 0.911913 | 1.182546 | 0.569289 |
| ADCK2    | 1.371566 | 0.914868 | 2.056247 | 0.126191 |
| MKRN1    | 0.891043 | 0.592221 | 1.340644 | 0.579931 |
| AGAP3    | 1.045506 | 0.821463 | 1.330653 | 0.717612 |
| KRBA1    | 1.010192 | 0.769918 | 1.325451 | 0.941665 |
| ACTR3B   | 0.759497 | 0.493244 | 1.169472 | 0.211621 |
| BTG1     | 0.991966 | 0.765829 | 1.284878 | 0.951275 |
| ATP13A3  | 0.62884  | 0.40731  | 0.970857 | 0.03631  |
| KRAS     | 0.918081 | 0.569961 | 1.478826 | 0.725291 |
| IPO8     | 0.916312 | 0.584629 | 1.43617  | 0.703063 |
| IMPA1    | 0.895928 | 0.576984 | 1.391179 | 0.624509 |
| LRRCC1   | 1.137568 | 0.873882 | 1.480819 | 0.338066 |
| E2F5     | 1.310866 | 0.911346 | 1.885529 | 0.144442 |
| CA1      | 0.949994 | 0.849364 | 1.062546 | 0.369193 |
| CCDC59   | 0.842923 | 0.499914 | 1.421283 | 0.52148  |
| SWAP70   | 1.382228 | 1.004908 | 1.901223 | 0.046584 |
| ARNTL    | 1.140806 | 0.914572 | 1.423003 | 0.242756 |
| LYVE1    | 1.21782  | 0.979736 | 1.51376  | 0.075814 |

|           |          |          |          |          |
|-----------|----------|----------|----------|----------|
| AMPD3     | 0.826809 | 0.609828 | 1.120995 | 0.220747 |
| SBF2      | 1.20332  | 0.943519 | 1.534658 | 0.135839 |
| MICAL2    | 1.128913 | 0.934387 | 1.363937 | 0.208884 |
| RRAS2     | 1.005279 | 0.825528 | 1.22417  | 0.95822  |
| HSD17B4   | 0.908872 | 0.61087  | 1.352249 | 0.637392 |
| ZFC3H1    | 0.74771  | 0.472805 | 1.182455 | 0.213761 |
| RNF122    | 1.003918 | 0.674959 | 1.493204 | 0.984599 |
| DPF2      | 1.234068 | 0.682504 | 2.231378 | 0.486461 |
| MEN1      | 1.355941 | 0.870418 | 2.11229  | 0.178194 |
| NUMB      | 1.027353 | 0.689407 | 1.530958 | 0.89452  |
| COX16     | 1.474928 | 0.88697  | 2.452633 | 0.134211 |
| TTC9      | 1.015821 | 0.834342 | 1.236774 | 0.875775 |
| MED6      | 0.689541 | 0.335278 | 1.418126 | 0.312296 |
| EIF2S1    | 1.255326 | 0.789579 | 1.995802 | 0.336423 |
| ADAM20    | 0.593996 | 0.314798 | 1.120816 | 0.10786  |
| LOXL2     | 1.115546 | 0.670532 | 1.855904 | 0.673741 |
| ELP3      | 1.351022 | 0.768092 | 2.376359 | 0.296385 |
| ADAMDEC   | 1.257576 | 1.063946 | 1.486444 | 0.007219 |
| MBD2      | 1.35235  | 0.915522 | 1.997606 | 0.129387 |
| IER3IP1   | 0.689874 | 0.437675 | 1.087396 | 0.109804 |
| MRPS36    | 1.019411 | 0.639926 | 1.623936 | 0.935502 |
| CCNB1     | 0.873472 | 0.673449 | 1.132906 | 0.307955 |
| CDK7      | 0.803592 | 0.430165 | 1.501192 | 0.492838 |
| CD180     | 1.249424 | 1.082374 | 1.442255 | 0.002359 |
| IRAK2     | 0.908045 | 0.726429 | 1.135068 | 0.396871 |
| CAMK1     | 1.076547 | 0.821788 | 1.410284 | 0.592401 |
| THUMPD3   | 1.130219 | 0.629655 | 2.02872  | 0.681714 |
| VHL       | 1.315245 | 0.706848 | 2.447301 | 0.38709  |
| ARL8B     | 1.173883 | 0.720773 | 1.911836 | 0.519435 |
| EDEM1     | 0.996356 | 0.654553 | 1.516647 | 0.986414 |
| MEIS2     | 1.026891 | 0.689609 | 1.529134 | 0.896076 |
| GNAT2     | 0.990232 | 0.711547 | 1.378068 | 0.953581 |
| GSTM1     | 1.031718 | 0.928133 | 1.146862 | 0.562979 |
| PRPF38B   | 0.998789 | 0.513472 | 1.942809 | 0.997151 |
| TSPAN2    | 1.07722  | 0.927694 | 1.250846 | 0.329267 |
| TSHB      | 1.022688 | 0.774432 | 1.350528 | 0.874351 |
| GSTM5     | 1.08888  | 0.906289 | 1.308258 | 0.363216 |
| GSTM3     | 1.066331 | 0.863241 | 1.317201 | 0.551329 |
| VAV3      | 1.290059 | 0.983931 | 1.691431 | 0.065364 |
| PSRC1     | 1.290152 | 1.015394 | 1.639258 | 0.03707  |
| PTPN22    | 1.002239 | 0.768272 | 1.307458 | 0.986844 |
| SORT1     | 1.223751 | 1.091471 | 1.372062 | 0.000541 |
| WNT2B     | 0.958805 | 0.543253 | 1.692227 | 0.884607 |
| PTGFRN    | 0.911174 | 0.759357 | 1.093344 | 0.317161 |
| NOTCH2    | 1.221798 | 0.981465 | 1.520981 | 0.073045 |
| TRIM45    | 1.198847 | 0.816786 | 1.759622 | 0.354286 |
| CEPT1     | 0.695934 | 0.452827 | 1.069557 | 0.098274 |
| AP4B1     | 1.258151 | 0.791128 | 2.000872 | 0.331969 |
| NAPG      | 0.822094 | 0.477607 | 1.415054 | 0.479557 |
| SPIRE1    | 0.931034 | 0.759249 | 1.141687 | 0.492291 |
| PPHLN1    | 1.17756  | 0.609784 | 2.273998 | 0.626416 |
| FKBP11    | 1.458629 | 0.91042  | 2.33694  | 0.116481 |
| ARF3      | 2.230019 | 1.370876 | 3.627596 | 0.001235 |
| TMEM106   | 1.444498 | 1.064511 | 1.960125 | 0.018208 |
| SLC38A2   | 0.734997 | 0.542711 | 0.995412 | 0.046626 |
| YWHAQ     | 1.093504 | 0.655052 | 1.825428 | 0.732432 |
| KIDINS220 | 0.99668  | 0.656682 | 1.512713 | 0.987537 |
| GRHL1     | 0.628647 | 0.244555 | 1.615983 | 0.335234 |



|         |          |          |          |          |
|---------|----------|----------|----------|----------|
| ROCK2   | 0.931617 | 0.646332 | 1.342824 | 0.704148 |
| RSAD2   | 1.113699 | 0.911556 | 1.360669 | 0.29198  |
| MYCN    | 0.925696 | 0.820687 | 1.044142 | 0.208816 |
| LPIN1   | 1.294438 | 0.979298 | 1.71099  | 0.069831 |
| CMPK2   | 1.077658 | 0.835882 | 1.389368 | 0.563952 |
| IAH1    | 1.421156 | 0.73406  | 2.751386 | 0.297069 |
| LDHA    | 1.230618 | 0.791412 | 1.913569 | 0.356878 |
| IL6ST   | 1.086621 | 0.8813   | 1.339777 | 0.436897 |
| FST     | 0.755515 | 0.563323 | 1.013279 | 0.061223 |
| NAV1    | 0.922233 | 0.781848 | 1.087825 | 0.336626 |
| CDC73   | 0.983524 | 0.595715 | 1.623797 | 0.948219 |
| TIMM17A | 1.281881 | 0.715416 | 2.296872 | 0.403982 |
| RPS15A  | 0.985555 | 0.602233 | 1.612864 | 0.953832 |
| RBM17   | 1.622642 | 0.848477 | 3.103169 | 0.143396 |
| IL2RA   | 1.328435 | 1.180061 | 1.495464 | 2.60E-06 |
| ANKRD16 | 1.01519  | 0.673139 | 1.531051 | 0.942672 |
| ECHDC3  | 1.421469 | 1.178842 | 1.714034 | 0.000231 |
| IL15RA  | 1.585023 | 1.213275 | 2.070674 | 0.000731 |
| CCNH    | 0.565794 | 0.342217 | 0.935438 | 0.02641  |
| HRH4    | 0.704738 | 0.523233 | 0.949205 | 0.021276 |
| KCTD1   | 0.636908 | 0.478731 | 0.847348 | 0.001954 |
| CABLES1 | 0.879901 | 0.732532 | 1.056918 | 0.171293 |
| DOCK2   | 1.033946 | 0.70843  | 1.509033 | 0.86261  |
| EMP1    | 1.056344 | 0.920946 | 1.211648 | 0.433493 |
| SOX5    | 1.360048 | 0.815278 | 2.268836 | 0.238882 |
| KLRD1   | 1.167905 | 0.91971  | 1.483078 | 0.202901 |
| KLRC1   | 1.010044 | 0.702797 | 1.451612 | 0.956929 |
| PRH2    | 0.679666 | 0.476709 | 0.96903  | 0.032859 |
| LRP4    | 0.865832 | 0.689717 | 1.086917 | 0.214369 |
| MYBPC3  | 0.847376 | 0.581548 | 1.234716 | 0.388557 |
| DDB2    | 1.269902 | 0.852804 | 1.890997 | 0.239524 |
| ACP2    | 1.449664 | 1.059115 | 1.984229 | 0.020418 |
| RAB33A  | 1.181376 | 0.976501 | 1.429234 | 0.086299 |
| RBMX2   | 1.992215 | 1.077631 | 3.683005 | 0.027918 |
| PIWIL4  | 0.904124 | 0.756399 | 1.080699 | 0.268156 |
| PUM1    | 0.817141 | 0.47296  | 1.411786 | 0.469155 |
| PHC2    | 1.434747 | 1.004091 | 2.050111 | 0.047436 |
| CDCA8   | 1.040573 | 0.766357 | 1.412909 | 0.798845 |
| GNL2    | 1.240766 | 0.693647 | 2.219429 | 0.467168 |
| HOOK1   | 1.037259 | 0.840954 | 1.279389 | 0.732538 |
| BTF3L4  | 0.497461 | 0.296529 | 0.834547 | 0.008166 |
| PRPF38A | 0.912951 | 0.529615 | 1.573746 | 0.743059 |
| DSC2    | 0.904715 | 0.785652 | 1.041823 | 0.164266 |
| RNF138  | 0.890651 | 0.593808 | 1.335887 | 0.575571 |
| ELP2    | 0.703953 | 0.458613 | 1.080541 | 0.108349 |
| DSC3    | 0.033744 | 7.41E-06 | 153.6718 | 0.430398 |
| DTNA    | 1.066341 | 0.883253 | 1.287382 | 0.503931 |
| DAGLA   | 0.979262 | 0.819108 | 1.17073  | 0.8181   |
| SLC43A3 | 1.455232 | 1.00451  | 2.108191 | 0.047283 |
| TIMM10  | 1.536323 | 0.973646 | 2.424175 | 0.065009 |
| DHX34   | 1.286518 | 0.872114 | 1.897835 | 0.20404  |
| APLNR   | 0.979049 | 0.733135 | 1.307448 | 0.885916 |
| FADS2   | 1.211222 | 0.965652 | 1.519242 | 0.097393 |
| TCN1    | 0.899025 | 0.794989 | 1.016676 | 0.089813 |
| TMEM165 | 0.435134 | 0.242648 | 0.780314 | 0.005232 |
| CLOCK   | 0.686208 | 0.46372  | 1.015443 | 0.059657 |
| COL4A2  | 0.796974 | 0.516781 | 1.229084 | 0.304548 |
| CLDN10  | 0.852746 | 0.720974 | 1.0086   | 0.06289  |

|         |          |          |          |          |
|---------|----------|----------|----------|----------|
| UBAC2   | 1.230933 | 0.699018 | 2.167605 | 0.471728 |
| ARGLU1  | 0.787906 | 0.520413 | 1.192891 | 0.259968 |
| BIVM    | 1.021411 | 0.810951 | 1.286491 | 0.857184 |
| ERCC5   | 0.748306 | 0.438595 | 1.276716 | 0.287454 |
| TPP2    | 0.51179  | 0.344813 | 0.759625 | 0.000886 |
| CARS2   | 1.19188  | 0.661188 | 2.148522 | 0.559318 |
| STT3A   | 0.836404 | 0.513379 | 1.362681 | 0.473161 |
| ACRV1   | 1.043714 | 0.705173 | 1.544782 | 0.830649 |
| ETS1    | 1.037135 | 0.835255 | 1.28781  | 0.741308 |
| SLC37A2 | 1.122665 | 0.968522 | 1.301339 | 0.124658 |
| KLB     | 0.643515 | 0.362697 | 1.141756 | 0.131859 |
| TMED7   | 0.779989 | 0.537576 | 1.131717 | 0.190736 |
| APC     | 0.831744 | 0.584596 | 1.183377 | 0.305808 |
| WDR36   | 0.812635 | 0.523935 | 1.260415 | 0.354203 |
| OSTF1   | 1.218939 | 0.897152 | 1.656143 | 0.205523 |
| RFK     | 1.034123 | 0.698946 | 1.530033 | 0.86668  |
| UBQLN1  | 0.971062 | 0.590951 | 1.595666 | 0.907744 |
| ANXA1   | 1.018565 | 0.829611 | 1.250556 | 0.860527 |
| AGTPBP1 | 0.663008 | 0.515973 | 0.851944 | 0.001316 |
| GOLM1   | 0.868872 | 0.643776 | 1.172674 | 0.358214 |
| PSAT1   | 1.299826 | 1.085875 | 1.555932 | 0.004266 |
| ISCA1   | 1.110452 | 0.701495 | 1.75782  | 0.65483  |
| ADAM19  | 1.084873 | 0.878852 | 1.339189 | 0.448369 |
| HAVCR2  | 1.202172 | 1.004936 | 1.438119 | 0.044028 |
| CCNJL   | 0.397057 | 0.217628 | 0.72442  | 0.002606 |
| TAOK3   | 1.265893 | 0.818376 | 1.958129 | 0.289424 |
| USP30   | 0.620032 | 0.368559 | 1.043088 | 0.071701 |
| SDS     | 1.666156 | 1.162239 | 2.388558 | 0.005467 |
| HNF1A   | 0.569004 | 0.139414 | 2.322339 | 0.431994 |
| FBXO21  | 1.237232 | 0.878622 | 1.742209 | 0.222851 |
| OASL    | 1.343831 | 1.095096 | 1.649063 | 0.004657 |
| HRK     | 4.395182 | 1.723955 | 11.20541 | 0.001932 |
| RNFT2   | 1.174268 | 0.931471 | 1.480353 | 0.174056 |
| P2RX4   | 0.887846 | 0.566197 | 1.392221 | 0.604265 |
| DTX1    | 1.050394 | 0.841372 | 1.311344 | 0.664078 |
| TRAFD1  | 1.330806 | 0.83419  | 2.123071 | 0.230445 |
| DMTF1   | 0.712953 | 0.461078 | 1.102421 | 0.12814  |
| CCDC146 | 0.620533 | 0.436101 | 0.882962 | 0.00801  |
| TMEM60  | 1.066838 | 0.682026 | 1.668768 | 0.776839 |
| CD36    | 1.120785 | 1.000155 | 1.255964 | 0.049689 |
| UGT2B28 | 0.935413 | 0.788802 | 1.109274 | 0.442702 |
| PNPLA8  | 0.876467 | 0.606903 | 1.26576  | 0.481952 |
| RINT1   | 0.631465 | 0.375479 | 1.061973 | 0.08305  |
| SRPK2   | 0.641014 | 0.43624  | 0.94191  | 0.023529 |
| TES     | 1.009029 | 0.825078 | 1.233992 | 0.93025  |
| MDFIC   | 1.000195 | 0.859514 | 1.163903 | 0.997986 |
| MTO1    | 1.14084  | 0.65112  | 1.998887 | 0.645166 |
| ANKRD6  | 1.058669 | 0.788819 | 1.420833 | 0.70411  |
| KHDC1   | 1.469265 | 1.106953 | 1.950163 | 0.007737 |
| SYNCRIP | 0.764659 | 0.48115  | 1.215219 | 0.256267 |
| SNX14   | 0.883095 | 0.485506 | 1.606277 | 0.683784 |
| NT5E    | 0.866373 | 0.717858 | 1.045613 | 0.134897 |
| AKIRIN2 | 1.415259 | 0.949043 | 2.110501 | 0.088485 |
| LCA5    | 0.995633 | 0.734743 | 1.349159 | 0.977479 |
| MAP3K7  | 0.975527 | 0.563108 | 1.689998 | 0.929577 |
| CGA     | 4.056403 | 0.026221 | 627.5326 | 0.586175 |
| LMO2    | 1.42761  | 0.991186 | 2.056194 | 0.055824 |
| PHF21A  | 0.891379 | 0.506668 | 1.568199 | 0.689937 |

|           |          |          |          |          |
|-----------|----------|----------|----------|----------|
| NAT10     | 1.223048 | 0.807119 | 1.853316 | 0.342378 |
| PRRG4     | 1.150859 | 0.913873 | 1.449299 | 0.232329 |
| CAPRIN1   | 0.870101 | 0.566835 | 1.335617 | 0.524517 |
| DNAJC14   | 1.134482 | 0.675986 | 1.903957 | 0.632909 |
| CD63      | 1.005403 | 0.740785 | 1.364547 | 0.972414 |
| AVIL      | 0.804106 | 0.560238 | 1.154126 | 0.237004 |
| GDF11     | 0.713031 | 0.534575 | 0.951059 | 0.02137  |
| GLS2      | 0.940631 | 0.486375 | 1.819146 | 0.855683 |
| ITGA7     | 1.259143 | 1.071361 | 1.479839 | 0.005166 |
| FAM186B   | 0.855745 | 0.630087 | 1.162221 | 0.318556 |
| RDH5      | 1.58627  | 1.080951 | 2.327814 | 0.018386 |
| AGAP2     | 1.334297 | 0.961256 | 1.852106 | 0.084746 |
| BLOC1S1   | 1.984776 | 1.339402 | 2.941115 | 0.000635 |
| CDK4      | 1.340117 | 0.851566 | 2.108954 | 0.205716 |
| PPP1R1A   | 1.401706 | 0.889475 | 2.20892  | 0.145604 |
| TROAP     | 0.967059 | 0.744596 | 1.255988 | 0.801713 |
| TSPAN31   | 0.921038 | 0.449665 | 1.886541 | 0.822099 |
| TFCP2     | 0.918095 | 0.521248 | 1.617077 | 0.767326 |
| COQ10A    | 0.630681 | 0.433262 | 0.918056 | 0.016116 |
| PAN2      | 0.801873 | 0.571808 | 1.124504 | 0.200607 |
| ESPL1     | 1.092537 | 0.825581 | 1.445815 | 0.535829 |
| ZC3H10    | 1.004946 | 0.548989 | 1.839591 | 0.98724  |
| HNRNPA1   | 0.900654 | 0.61392  | 1.321308 | 0.592581 |
| ACVR1B    | 0.740646 | 0.551428 | 0.994791 | 0.04608  |
| OS9       | 0.974934 | 0.641377 | 1.481963 | 0.90542  |
| KCNH3     | 1.215325 | 0.945716 | 1.561795 | 0.127549 |
| LTV1      | 0.92225  | 0.55456  | 1.53373  | 0.75513  |
| MAP7      | 1.19867  | 1.036965 | 1.385592 | 0.01425  |
| CD164     | 1.012366 | 0.744842 | 1.375976 | 0.937432 |
| AHI1      | 0.738867 | 0.506311 | 1.07824  | 0.11657  |
| HEY2      | 1.133182 | 0.653708 | 1.964332 | 0.655994 |
| PKIB      | 1.228509 | 1.031437 | 1.463235 | 0.021058 |
| SMPD2     | 1.314706 | 0.816565 | 2.116736 | 0.260164 |
| MICAL1    | 1.317466 | 1.033238 | 1.679879 | 0.02617  |
| REPS1     | 0.750198 | 0.418592 | 1.344498 | 0.334278 |
| STX11     | 1.192411 | 1.023766 | 1.388838 | 0.023706 |
| TEC       | 0.86351  | 0.669463 | 1.113802 | 0.258465 |
| SEMA4F    | 1.138318 | 0.862265 | 1.502749 | 0.360607 |
| CCT7      | 1.611181 | 0.96197  | 2.698528 | 0.06989  |
| EGR4      | 1.058575 | 0.866873 | 1.292671 | 0.576543 |
| RAB11FIP5 | 1.147392 | 0.944959 | 1.393191 | 0.165042 |
| SMYD5     | 1.108354 | 0.72991  | 1.683012 | 0.629301 |
| DYSF      | 1.131514 | 0.980539 | 1.305736 | 0.090837 |
| CCDC142   | 1.268074 | 0.769047 | 2.090915 | 0.351962 |
| EMX1      | 0.215427 | 0.066511 | 0.697762 | 0.010463 |
| KCNMB4    | 0.908246 | 0.728188 | 1.132827 | 0.393279 |
| USP15     | 0.954965 | 0.60842  | 1.498897 | 0.841214 |
| GNS       | 1.1368   | 0.90312  | 1.430944 | 0.274809 |
| CPM       | 1.144936 | 0.993054 | 1.320047 | 0.062325 |
| MDM2      | 1.287373 | 0.841979 | 1.968374 | 0.243609 |
| KLHL36    | 0.910865 | 0.583881 | 1.420966 | 0.680721 |
| MPHOSP1   | 1.253252 | 0.750777 | 2.092018 | 0.387864 |
| KIAA0513  | 1.225866 | 1.038824 | 1.446586 | 0.015914 |
| DYNC1LI2  | 0.888196 | 0.59035  | 1.336314 | 0.569431 |
| FBXL8     | 1.010568 | 0.72465  | 1.409296 | 0.950602 |
| FHOD1     | 1.192705 | 0.844323 | 1.684834 | 0.317383 |
| CCDC102A  | 1.385269 | 1.118272 | 1.716015 | 0.002852 |
| SLC9A5    | 1.237713 | 0.855339 | 1.791025 | 0.257984 |

|          |          |          |          |          |
|----------|----------|----------|----------|----------|
| AGT      | 0.948999 | 0.734756 | 1.225713 | 0.688434 |
| KCNK1    | 1.295136 | 1.044401 | 1.606066 | 0.018489 |
| URB2     | 1.140146 | 0.769678 | 1.688933 | 0.512981 |
| EGLN1    | 1.130693 | 0.868776 | 1.471573 | 0.360908 |
| COG2     | 1.011893 | 0.602454 | 1.699596 | 0.964357 |
| ABC10    | 0.770941 | 0.541317 | 1.09797  | 0.149326 |
| TAF5L    | 0.985688 | 0.549127 | 1.769317 | 0.961479 |
| GLUL     | 1.058343 | 0.769968 | 1.454722 | 0.726811 |
| STX6     | 0.642417 | 0.413823 | 0.997284 | 0.0486   |
| RNASEL   | 1.000971 | 0.665601 | 1.505319 | 0.996282 |
| DHX9     | 1.095421 | 0.71026  | 1.689447 | 0.680128 |
| KIAA1614 | 0.593957 | 0.390168 | 0.904188 | 0.015111 |
| CEP350   | 0.846579 | 0.570629 | 1.255976 | 0.407931 |
| NPL      | 1.027597 | 0.875632 | 1.205935 | 0.738826 |
| PIGC     | 1.202077 | 0.523881 | 2.758238 | 0.664045 |
| LAMC1    | 0.943448 | 0.840061 | 1.059558 | 0.325588 |
| RC3H1    | 0.661928 | 0.392245 | 1.117026 | 0.12224  |
| GPR55    | 1.585341 | 1.154595 | 2.176786 | 0.004391 |
| SP110    | 1.373956 | 0.964936 | 1.956353 | 0.078069 |
| MRPL44   | 1.627599 | 0.933362 | 2.838211 | 0.085999 |
| CHRND    | 1.940772 | 0.771867 | 4.879851 | 0.15868  |
| DOCK10   | 0.961828 | 0.767202 | 1.205829 | 0.735819 |
| TTLL4    | 1.073766 | 0.745627 | 1.546312 | 0.702099 |
| USP37    | 0.701661 | 0.456953 | 1.077413 | 0.105403 |
| HTR2B    | 0.673716 | 0.46572  | 0.974605 | 0.036037 |
| ITM2C    | 0.898947 | 0.766858 | 1.053789 | 0.188908 |
| SERPINE2 | 1.032387 | 0.867265 | 1.228947 | 0.720014 |
| DNAJB2   | 1.645331 | 1.104688 | 2.450569 | 0.014294 |
| WNT10A   | 1.122645 | 0.765756 | 1.645865 | 0.553401 |
| TMBIM1   | 1.907554 | 1.281205 | 2.840108 | 0.001472 |
| CYP27A1  | 1.091603 | 0.974612 | 1.222637 | 0.12968  |
| EIF4E2   | 1.896183 | 1.066061 | 3.372707 | 0.02943  |
| ARMC9    | 0.891887 | 0.614395 | 1.29471  | 0.547382 |
| CAB39    | 1.338815 | 0.879628 | 2.037709 | 0.173354 |
| COX5B    | 2.306599 | 1.485151 | 3.582396 | 0.000199 |
| REV1     | 0.637425 | 0.400525 | 1.014444 | 0.057502 |
| TSGA10   | 0.722145 | 0.551371 | 0.945811 | 0.018047 |
| MFSD9    | 1.168567 | 0.690138 | 1.978662 | 0.562084 |
| TMEM127  | 1.557119 | 1.027858 | 2.358905 | 0.036652 |
| EDAR     | 0.667587 | 0.37568  | 1.186308 | 0.168344 |
| TGFBRAP1 | 0.982553 | 0.717542 | 1.345442 | 0.912607 |
| GCC2     | 0.779088 | 0.532868 | 1.139078 | 0.197727 |
| MRPS9    | 1.057498 | 0.655676 | 1.705573 | 0.818685 |
| ANKRD36  | 0.727816 | 0.524229 | 1.010466 | 0.057726 |
| EPC2     | 0.712133 | 0.437914 | 1.158067 | 0.171177 |
| ARHGEF4  | 0.29585  | 0.059864 | 1.4621   | 0.135181 |
| ISCU     | 1.131433 | 0.712165 | 1.797532 | 0.601104 |
| ALDH1L2  | 1.137508 | 0.809223 | 1.598971 | 0.458345 |
| STAB2    | 1.004639 | 0.657058 | 1.536091 | 0.982954 |
| USP44    | 0.95411  | 0.776322 | 1.172615 | 0.655244 |
| SCYL2    | 0.845705 | 0.528094 | 1.354336 | 0.485476 |
| CKAP4    | 0.991232 | 0.862415 | 1.13929  | 0.901323 |
| PLXNC1   | 1.263506 | 1.039073 | 1.536415 | 0.019073 |
| APPL2    | 0.620362 | 0.387316 | 0.993631 | 0.046972 |
| PWP1     | 1.109176 | 0.692633 | 1.776225 | 0.666251 |
| DRAM1    | 1.043732 | 0.798328 | 1.364573 | 0.75429  |
| SLC41A2  | 1.365716 | 1.018669 | 1.830996 | 0.037195 |
| VILL     | 1.022554 | 0.69644  | 1.501372 | 0.909386 |

|          |          |          |          |          |
|----------|----------|----------|----------|----------|
| FLNB     | 1.117689 | 0.963302 | 1.29682  | 0.142375 |
| NEK3     | 0.994273 | 0.709067 | 1.394199 | 0.973438 |
| VPS36    | 0.610659 | 0.377573 | 0.987634 | 0.044358 |
| RNASEH2E | 0.366514 | 0.222215 | 0.604518 | 8.44E-05 |
| CKAP2    | 0.917708 | 0.642049 | 1.31172  | 0.637511 |
| TBC1D4   | 1.0406   | 0.847268 | 1.278047 | 0.704313 |
| THSD1    | 1.030937 | 0.720849 | 1.474414 | 0.867449 |
| LRCH1    | 0.769498 | 0.486233 | 1.217785 | 0.263265 |
| SUCLA2   | 1.129627 | 0.644461 | 1.979579 | 0.670225 |
| RCBTB1   | 0.93743  | 0.695835 | 1.262907 | 0.670892 |
| MED4     | 1.05941  | 0.605751 | 1.852824 | 0.839641 |
| PHF11    | 1.222625 | 0.728569 | 2.05171  | 0.446652 |
| COG3     | 0.709473 | 0.434552 | 1.158323 | 0.169961 |
| LMO7     | 0.813707 | 0.533335 | 1.241469 | 0.33884  |
| ITM2B    | 1.144763 | 0.740088 | 1.770711 | 0.543518 |
| SPRY2    | 0.81392  | 0.711794 | 0.930699 | 0.002614 |
| NUDT15   | 1.173497 | 0.739756 | 1.861552 | 0.496775 |
| EDNRB    | 1.135649 | 0.694228 | 1.857746 | 0.612453 |
| RCBTB2   | 1.109688 | 0.875721 | 1.406164 | 0.388965 |
| LCP1     | 1.347402 | 1.001238 | 1.813247 | 0.049053 |
| SETDB2   | 1.016229 | 0.676045 | 1.527592 | 0.938295 |
| SCRN1    | 1.130101 | 1.001541 | 1.275164 | 0.04715  |
| TNS3     | 1.300352 | 1.086357 | 1.556501 | 0.004199 |
| SPDYE1   | 0.657103 | 0.441229 | 0.978595 | 0.038787 |
| CHST12   | 1.01041  | 0.840666 | 1.214428 | 0.91212  |
| IGF2BP3  | 1.855275 | 1.308994 | 2.629533 | 0.000515 |
| GPNMB    | 1.274525 | 0.976062 | 1.664253 | 0.074753 |
| RAPGEF5  | 1.046703 | 0.710971 | 1.540972 | 0.817074 |
| RAC1     | 1.225308 | 0.766179 | 1.959569 | 0.396335 |
| KDELR2   | 0.713863 | 0.422472 | 1.206235 | 0.207891 |
| IL6      | 1.340381 | 0.596589 | 3.01149  | 0.478128 |
| ZDHHC4   | 1.021513 | 0.544273 | 1.917218 | 0.947169 |
| AOAH     | 0.939392 | 0.811417 | 1.087551 | 0.402736 |
| BZW2     | 1.131644 | 0.76797  | 1.667536 | 0.531811 |
| TBRG4    | 1.225409 | 0.766521 | 1.959016 | 0.395778 |
| DDX56    | 0.952814 | 0.594735 | 1.526487 | 0.840694 |
| HUS1     | 0.751112 | 0.431716 | 1.306805 | 0.311097 |
| NACAD    | 0.805254 | 0.442732 | 1.46462  | 0.477906 |
| DBNL     | 1.544251 | 1.030589 | 2.313931 | 0.035205 |
| CCM2     | 0.869405 | 0.586757 | 1.288209 | 0.485438 |
| MYO1G    | 1.406619 | 1.08151  | 1.829458 | 0.01095  |
| TTYH3    | 1.388346 | 1.103464 | 1.746777 | 0.005107 |
| TTC5     | 0.901153 | 0.545213 | 1.489467 | 0.684773 |
| ZFHX2    | 0.734408 | 0.508735 | 1.060188 | 0.099364 |
| MTHFS    | 1.391178 | 0.617065 | 3.136423 | 0.426039 |
| ADAMTS7  | 0.633068 | 0.456519 | 0.877894 | 0.006132 |
| IREB2    | 0.813406 | 0.508514 | 1.301104 | 0.388843 |
| ALPK3    | 0.918797 | 0.741203 | 1.138942 | 0.439639 |
| TM6SF1   | 0.728816 | 0.59978  | 0.885613 | 0.001464 |
| CIB2     | 1.262666 | 0.999317 | 1.595416 | 0.050673 |
| CALCOCO  | 0.902934 | 0.681085 | 1.197045 | 0.477855 |
| RSAD1    | 1.043511 | 0.634545 | 1.716058 | 0.866729 |
| NMT1     | 1.474508 | 0.813227 | 2.673513 | 0.200892 |
| MYCBPAP  | 1.062816 | 0.841373 | 1.342542 | 0.609307 |
| VEZF1    | 1.001495 | 0.635014 | 1.579479 | 0.994874 |
| CHAD     | 1.212686 | 0.795832 | 1.847885 | 0.369548 |
| TACO1    | 2.298965 | 1.062276 | 4.975393 | 0.034572 |
| TEX2     | 1.149408 | 0.82116  | 1.608868 | 0.417038 |

|           |          |          |          |          |
|-----------|----------|----------|----------|----------|
| DCAF7     | 1.172239 | 0.737882 | 1.862281 | 0.501021 |
| LIMD2     | 1.200279 | 0.861738 | 1.671817 | 0.280232 |
| BRIP1     | 0.955731 | 0.714356 | 1.278666 | 0.760471 |
| RTP4      | 1.405848 | 1.138405 | 1.736122 | 0.001556 |
| ACTL6A    | 0.812653 | 0.524363 | 1.259442 | 0.353382 |
| NDUFB5    | 1.218545 | 0.741143 | 2.003462 | 0.4359   |
| MRPL47    | 1.232691 | 0.68912  | 2.205027 | 0.480769 |
| ERMN      | 1.387721 | 1.045472 | 1.842009 | 0.023346 |
| GALNT5    | 1.26167  | 0.961872 | 1.654909 | 0.093126 |
| TANK      | 0.826545 | 0.507052 | 1.347349 | 0.444801 |
| BLK       | 1.057136 | 0.869715 | 1.284946 | 0.576819 |
| SKIL      | 0.843026 | 0.650647 | 1.092288 | 0.196345 |
| HLX       | 1.322992 | 1.050384 | 1.666349 | 0.01743  |
| VPS45     | 1.082225 | 0.651472 | 1.797792 | 0.760253 |
| IL10      | 1.47975  | 1.18107  | 1.853962 | 0.000657 |
| KCTD3     | 1.160211 | 0.82466  | 1.632296 | 0.393574 |
| RPS6KC1   | 1.211599 | 0.74911  | 1.959621 | 0.433966 |
| CBWD2     | 1.322453 | 0.807389 | 2.166095 | 0.266937 |
| IL1RN     | 1.212351 | 1.06223  | 1.383688 | 0.004303 |
| SMPD4     | 1.224005 | 0.792993 | 1.889285 | 0.361413 |
| WDR33     | 0.778724 | 0.374733 | 1.618249 | 0.502755 |
| CCDC115   | 1.672915 | 0.859263 | 3.257029 | 0.130089 |
| SAP130    | 1.082953 | 0.644308 | 1.820228 | 0.763574 |
| BIN1      | 1.159964 | 0.960211 | 1.401272 | 0.12383  |
| IMP4      | 1.436774 | 0.803362 | 2.569599 | 0.221784 |
| HS6ST1    | 0.93     | 0.679762 | 1.272357 | 0.649981 |
| GYPC      | 0.87019  | 0.735149 | 1.030037 | 0.106094 |
| STAM      | 0.787766 | 0.542417 | 1.144094 | 0.210226 |
| ABI1      | 1.28035  | 0.663026 | 2.472444 | 0.461703 |
| YME1L1    | 1.122488 | 0.625672 | 2.013801 | 0.698405 |
| DNAJC1    | 1.392114 | 1.075751 | 1.801516 | 0.0119   |
| NIPSNAP3  | 1.118794 | 0.717801 | 1.743798 | 0.62009  |
| LRRRC8A   | 0.949415 | 0.686662 | 1.31271  | 0.753513 |
| CDK9      | 1.337642 | 0.907018 | 1.972714 | 0.142209 |
| TXN       | 1.316668 | 0.838147 | 2.068388 | 0.23256  |
| ODF2      | 0.955422 | 0.576276 | 1.584016 | 0.859673 |
| TOR1B     | 1.059892 | 0.660921 | 1.699704 | 0.809253 |
| SMC2      | 1.049808 | 0.773411 | 1.424982 | 0.755199 |
| KLF4      | 1.094535 | 0.976833 | 1.22642  | 0.11967  |
| TOR1A     | 0.883455 | 0.571905 | 1.364726 | 0.576512 |
| RALGPS1   | 1.1049   | 0.763899 | 1.598122 | 0.596288 |
| ST6GALNA7 | 1.453722 | 1.138045 | 1.856963 | 0.002742 |
| TMOD1     | 1.211028 | 1.004853 | 1.459507 | 0.044346 |
| DAB2IP    | 0.895322 | 0.638231 | 1.255975 | 0.522005 |
| STXBP1    | 0.820099 | 0.665332 | 1.010868 | 0.063075 |
| SLC2A8    | 1.362025 | 1.078454 | 1.720158 | 0.009484 |
| ANGPTL2   | 0.865495 | 0.621129 | 1.206001 | 0.393443 |
| CDK5RAP2  | 0.946704 | 0.628754 | 1.425438 | 0.793093 |
| SLC31A2   | 0.838846 | 0.623459 | 1.128645 | 0.24578  |
| SLC31A1   | 1.197729 | 0.893236 | 1.606021 | 0.227985 |
| TLR4      | 1.121704 | 0.973518 | 1.292446 | 0.112129 |
| ZNF189    | 0.899504 | 0.601463 | 1.345232 | 0.606021 |
| STX17     | 0.825708 | 0.548469 | 1.243083 | 0.358875 |
| PRPF4     | 1.797119 | 0.931207 | 3.468227 | 0.080552 |
| FPGS      | 1.301099 | 0.919482 | 1.8411   | 0.137271 |
| USP20     | 0.979734 | 0.748947 | 1.281639 | 0.881247 |
| ATP6V1G1  | 1.218393 | 0.68001  | 2.183029 | 0.506771 |
| TEX10     | 0.741999 | 0.505044 | 1.090129 | 0.128433 |

|          |          |          |          |          |
|----------|----------|----------|----------|----------|
| GARNL3   | 1.364333 | 1.006356 | 1.849647 | 0.045417 |
| MRPL50   | 1.258286 | 0.844449 | 1.874931 | 0.258862 |
| DPM2     | 1.945801 | 1.19075  | 3.179628 | 0.00789  |
| WDR38    | 1.344228 | 0.760987 | 2.374479 | 0.30818  |
| TSTD2    | 0.860073 | 0.586788 | 1.260635 | 0.439705 |
| HEMGN    | 0.989733 | 0.87985  | 1.11334  | 0.863541 |
| PSMB7    | 1.376294 | 0.738173 | 2.566046 | 0.314962 |
| NR5A1    | 0.878406 | 0.694786 | 1.110554 | 0.278556 |
| RABEPK   | 0.908001 | 0.488256 | 1.688592 | 0.760449 |
| GOLGA1   | 1.014547 | 0.624276 | 1.648801 | 0.953516 |
| XPA      | 1.010896 | 0.66785  | 1.53015  | 0.959136 |
| NCBP1    | 0.925116 | 0.602859 | 1.419634 | 0.721657 |
| ANP32B   | 1.498614 | 0.881161 | 2.548733 | 0.135428 |
| PDCL     | 0.931653 | 0.58126  | 1.493268 | 0.768664 |
| RPL35    | 1.422462 | 0.887602 | 2.279624 | 0.143069 |
| LMX1B    | 1.165897 | 0.812215 | 1.673592 | 0.405278 |
| ARPC5L   | 1.74944  | 1.221997 | 2.50454  | 0.00225  |
| ENPP2    | 1.319093 | 1.099795 | 1.582119 | 0.002832 |
| DSCC1    | 0.986085 | 0.733378 | 1.325871 | 0.926096 |
| DERL1    | 1.154247 | 0.555235 | 2.399498 | 0.700839 |
| MYC      | 0.997855 | 0.802387 | 1.240941 | 0.984598 |
| RANBP6   | 0.999141 | 0.676417 | 1.475838 | 0.996554 |
| POLR1E   | 1.136079 | 0.786264 | 1.641529 | 0.496871 |
| PLAA     | 0.914657 | 0.517492 | 1.616638 | 0.75886  |
| IL11RA   | 0.909376 | 0.688989 | 1.20026  | 0.502305 |
| UBAP2    | 0.918165 | 0.531893 | 1.584956 | 0.759211 |
| APTX     | 1.359365 | 0.580282 | 3.184441 | 0.479637 |
| RNF38    | 0.737622 | 0.433744 | 1.254395 | 0.261296 |
| TLN1     | 1.550396 | 1.154472 | 2.0821   | 0.00356  |
| SIT1     | 1.087593 | 0.86908  | 1.361047 | 0.463095 |
| DNAJB5   | 2.006377 | 1.13868  | 3.535277 | 0.015983 |
| SPAG8    | 1.051328 | 0.669575 | 1.650735 | 0.827862 |
| DCTN3    | 1.45258  | 0.881229 | 2.394371 | 0.143162 |
| CD72     | 1.153842 | 0.941358 | 1.414289 | 0.168199 |
| TMEM8B   | 1.139273 | 0.817964 | 1.586797 | 0.440514 |
| GRHPR    | 1.070681 | 0.705049 | 1.625925 | 0.748669 |
| ALDH1B1  | 1.192422 | 0.846286 | 1.680132 | 0.314436 |
| DENND4C  | 0.745145 | 0.557785 | 0.995439 | 0.046492 |
| RPS6     | 1.091511 | 0.755217 | 1.577556 | 0.641241 |
| CNPY3    | 1.436159 | 0.951882 | 2.166814 | 0.084534 |
| FOXP4    | 1.178582 | 0.898199 | 1.54649  | 0.235858 |
| PPIL1    | 1.204541 | 0.82468  | 1.759372 | 0.335673 |
| KLC4     | 1.042413 | 0.664159 | 1.636092 | 0.856673 |
| KIF13A   | 0.951429 | 0.751208 | 1.205016 | 0.679601 |
| PIM1     | 1.306328 | 1.061058 | 1.608294 | 0.011784 |
| GMPR     | 0.933888 | 0.764596 | 1.140662 | 0.502685 |
| YIPF3    | 1.52983  | 0.857392 | 2.72965  | 0.150109 |
| TMEM14B  | 1.224044 | 0.680411 | 2.202024 | 0.499834 |
| TMEM63B  | 1.149493 | 0.870675 | 1.517597 | 0.325645 |
| FRS3     | 1.429282 | 0.963391 | 2.120476 | 0.075955 |
| TJAP1    | 1.192195 | 0.723807 | 1.963686 | 0.489909 |
| CAPN11   | 1.002822 | 0.826812 | 1.2163   | 0.977172 |
| IRF4     | 1.110318 | 0.903728 | 1.364134 | 0.319124 |
| SLC22A23 | 0.856542 | 0.647776 | 1.13259  | 0.27729  |
| TUBB2A   | 0.981643 | 0.816433 | 1.180285 | 0.84379  |
| LRRC1    | 1.000255 | 0.665661 | 1.503031 | 0.999022 |
| GCM1     | 0.56873  | 0.045747 | 7.070452 | 0.660746 |
| BPHL     | 0.735422 | 0.476789 | 1.134348 | 0.164574 |

|          |          |          |          |          |
|----------|----------|----------|----------|----------|
| RIPK1    | 0.920426 | 0.545288 | 1.553647 | 0.756234 |
| TUBB2B   | 1.673858 | 0.598002 | 4.685267 | 0.326639 |
| HMG1A1   | 1.462361 | 1.107285 | 1.9313   | 0.007404 |
| TCF19    | 1.434876 | 1.019742 | 2.019009 | 0.038251 |
| FLOT1    | 1.411542 | 1.108261 | 1.797817 | 0.005224 |
| IER3     | 1.170183 | 0.993482 | 1.378312 | 0.05988  |
| MDC1     | 0.997066 | 0.599549 | 1.658149 | 0.990968 |
| PGBD1    | 0.785885 | 0.60422  | 1.022169 | 0.072419 |
| TPMT     | 1.437861 | 0.982159 | 2.105001 | 0.061847 |
| RNF144B  | 1.25893  | 1.06026  | 1.494828 | 0.008596 |
| NRM      | 1.750806 | 1.185615 | 2.585429 | 0.004862 |
| MTCH1    | 1.984989 | 1.312633 | 3.001738 | 0.001158 |
| VARS2    | 1.009126 | 0.466049 | 2.185039 | 0.981613 |
| TAF8     | 1.428446 | 0.801387 | 2.546157 | 0.226598 |
| FAM8A1   | 0.758261 | 0.481356 | 1.194458 | 0.232652 |
| FGFBP2   | 1.172162 | 0.990238 | 1.387509 | 0.064897 |
| CPEB2    | 1.155431 | 0.874    | 1.527484 | 0.310401 |
| FHDC1    | 0.955872 | 0.786885 | 1.161148 | 0.64933  |
| TLR2     | 1.010259 | 0.870498 | 1.17246  | 0.89312  |
| MYO7A    | 1.353745 | 1.150382 | 1.593058 | 0.000266 |
| FCHSD2   | 0.697597 | 0.462499 | 1.052199 | 0.085921 |
| ARRB1    | 1.268202 | 0.829305 | 1.939379 | 0.272932 |
| SLCO2B1  | 1.099625 | 0.814209 | 1.485091 | 0.535649 |
| ANKRD42  | 0.601406 | 0.352852 | 1.025045 | 0.061617 |
| IL18BP   | 1.287689 | 0.81766  | 2.027913 | 0.275186 |
| NUMA1    | 1.061713 | 0.695545 | 1.620649 | 0.781392 |
| CCDC90B  | 0.908037 | 0.4935   | 1.670781 | 0.756495 |
| SYTL2    | 0.860408 | 0.638428 | 1.15957  | 0.323382 |
| RAB30    | 0.931117 | 0.650518 | 1.332753 | 0.696491 |
| CREBZF   | 0.686313 | 0.43474  | 1.083466 | 0.106128 |
| LRR32    | 1.384277 | 1.119232 | 1.712088 | 0.002711 |
| PRCP     | 1.046626 | 0.712366 | 1.537729 | 0.816417 |
| NARS2    | 0.622748 | 0.411784 | 0.941792 | 0.024824 |
| RNF121   | 0.735886 | 0.437415 | 1.238017 | 0.247884 |
| MRPL15   | 1.485069 | 0.955747 | 2.307546 | 0.078633 |
| PI15     | 1.135313 | 0.971043 | 1.327373 | 0.111503 |
| GGH      | 1.156942 | 0.832232 | 1.608343 | 0.385753 |
| SLCO5A1  | 0.936983 | 0.804548 | 1.091219 | 0.402492 |
| TGS1     | 1.189363 | 0.762289 | 1.855706 | 0.444827 |
| SDCBP    | 1.020586 | 0.733066 | 1.420877 | 0.90393  |
| NEK1     | 0.911572 | 0.596422 | 1.393248 | 0.668831 |
| DDX60    | 1.129385 | 0.895226 | 1.424791 | 0.304727 |
| SORL1    | 0.70987  | 0.57789  | 0.871992 | 0.001094 |
| BUD13    | 1.27853  | 0.696601 | 2.346593 | 0.427746 |
| TRPC6    | 1.083684 | 0.742987 | 1.580606 | 0.676444 |
| MMP7     | 1.202558 | 1.075477 | 1.344655 | 0.001208 |
| DCUN1D5  | 0.984738 | 0.526758 | 1.840899 | 0.961572 |
| SLC37A4  | 1.038767 | 0.72056  | 1.497498 | 0.8385   |
| RDX      | 0.966742 | 0.64297  | 1.453552 | 0.870874 |
| PPP2R1B  | 1.064449 | 0.693534 | 1.633737 | 0.775079 |
| FDX1     | 1.012413 | 0.599861 | 1.708697 | 0.963152 |
| FXYD6    | 1.288736 | 1.064054 | 1.56086  | 0.009455 |
| TMPRSS13 | 1.20534  | 0.845148 | 1.719041 | 0.302495 |
| CASP1    | 1.32179  | 1.097118 | 1.592471 | 0.003335 |
| CASP5    | 1.100526 | 0.910591 | 1.330078 | 0.321693 |
| ALKBH8   | 0.966961 | 0.644731 | 1.45024  | 0.870945 |
| MAP2K5   | 0.787477 | 0.388854 | 1.594734 | 0.506926 |
| CTDSPL2  | 0.663587 | 0.409766 | 1.074633 | 0.095451 |



|          |          |          |          |          |
|----------|----------|----------|----------|----------|
| SLTM     | 0.886194 | 0.536416 | 1.464052 | 0.637148 |
| THBS1    | 1.174938 | 1.063386 | 1.298193 | 0.001538 |
| MAPKBP1  | 1.034878 | 0.776261 | 1.379656 | 0.815233 |
| NUSAP1   | 1.043756 | 0.476598 | 2.28584  | 0.914729 |
| NDUFAF1  | 1.3468   | 0.647428 | 2.801656 | 0.425643 |
| KIF23    | 0.933649 | 0.702262 | 1.241274 | 0.636579 |
| ITGA11   | 0.795097 | 0.442615 | 1.428284 | 0.44296  |
| RTF1     | 1.297604 | 0.728524 | 2.311215 | 0.376401 |
| PARP6    | 0.878386 | 0.547902 | 1.408212 | 0.590261 |
| RPLP1    | 1.533769 | 1.047211 | 2.246394 | 0.028028 |
| PAQR5    | 0.939472 | 0.685673 | 1.287213 | 0.697576 |
| TUBGCP4  | 1.045536 | 0.671071 | 1.628957 | 0.84396  |
| ITPKA    | 0.739166 | 0.595605 | 0.91733  | 0.006086 |
| UACA     | 1.182173 | 0.90312  | 1.547451 | 0.223143 |
| SMAD6    | 1.58231  | 1.020515 | 2.453374 | 0.040295 |
| PLCB2    | 1.499239 | 1.157651 | 1.94162  | 0.002143 |
| TMEM62   | 0.873581 | 0.485383 | 1.572251 | 0.652159 |
| PAK6     | 1.077517 | 0.848282 | 1.3687   | 0.540709 |
| ADAM10   | 0.980555 | 0.672306 | 1.430136 | 0.918776 |
| DUOX1    | 0.895841 | 0.611873 | 1.311599 | 0.571751 |
| ZNF280D  | 0.500891 | 0.307725 | 0.815312 | 0.005412 |
| BCL2L10  | 0.946947 | 0.810345 | 1.106576 | 0.492814 |
| RSL24D1  | 0.789698 | 0.515632 | 1.209433 | 0.277643 |
| SPTBN5   | 1.363324 | 0.785705 | 2.365588 | 0.270358 |
| GCHFR    | 1.46463  | 0.911992 | 2.352151 | 0.114378 |
| BCAR3    | 0.857703 | 0.650617 | 1.130704 | 0.276286 |
| TTLL7    | 0.963152 | 0.736365 | 1.259786 | 0.784027 |
| FNBP1L   | 0.853209 | 0.741802 | 0.981347 | 0.026168 |
| GTF2B    | 1.971815 | 0.92495  | 4.203529 | 0.078754 |
| RABGGTB  | 1.055493 | 0.63808  | 1.745966 | 0.833419 |
| IFI44L   | 1.144085 | 1.01921  | 1.284259 | 0.022452 |
| IFI44    | 1.177916 | 0.938597 | 1.478256 | 0.157625 |
| SLC44A5  | 0.858134 | 0.695196 | 1.05926  | 0.15442  |
| DBT      | 0.749186 | 0.480001 | 1.169331 | 0.203628 |
| IFT172   | 0.767319 | 0.57803  | 1.018595 | 0.066878 |
| CGREF1   | 1.215733 | 0.987749 | 1.496338 | 0.065238 |
| HADHB    | 0.805656 | 0.48978  | 1.325253 | 0.394769 |
| KHK      | 1.355203 | 0.896688 | 2.048175 | 0.149173 |
| ADCY3    | 1.241197 | 0.980831 | 1.570679 | 0.072045 |
| PPM1B    | 0.862383 | 0.525784 | 1.414466 | 0.557567 |
| PNPT1    | 0.920468 | 0.57905  | 1.463192 | 0.726006 |
| DYNC2LI1 | 0.751374 | 0.543455 | 1.038842 | 0.083734 |
| THUMPD2  | 1.225528 | 0.762501 | 1.969728 | 0.400906 |
| CYP1B1   | 1.046039 | 0.910491 | 1.201766 | 0.524993 |
| RAB1A    | 1.16996  | 0.659687 | 2.074931 | 0.591297 |
| ACTR2    | 1.333646 | 0.935061 | 1.902135 | 0.111987 |
| PREB     | 1.753142 | 1.108217 | 2.77338  | 0.016438 |
| SLC5A6   | 1.402544 | 0.882084 | 2.230093 | 0.152803 |
| PREPL    | 0.589239 | 0.371991 | 0.933361 | 0.024207 |
| SLC3A1   | 0.576404 | 0.279481 | 1.188781 | 0.135766 |
| EMILIN1  | 0.95505  | 0.852383 | 1.070084 | 0.428009 |
| FBXO11   | 0.727158 | 0.440162 | 1.201281 | 0.213515 |
| SIX3     | 0.758237 | 0.631454 | 0.910475 | 0.003031 |
| CENPO    | 1.125385 | 0.728571 | 1.738321 | 0.594392 |
| LRPPRC   | 1.001941 | 0.697619 | 1.439018 | 0.991623 |
| DTNB     | 1.057172 | 0.751717 | 1.486747 | 0.749299 |
| ACTR1A   | 2.364726 | 1.349446 | 4.143869 | 0.002638 |
| CYP2C8   | 1.17766  | 0.978943 | 1.416716 | 0.082871 |

|           |          |          |          |          |
|-----------|----------|----------|----------|----------|
| MYOF      | 1.205709 | 1.072238 | 1.355795 | 0.001777 |
| LOXL4     | 0.710987 | 0.578887 | 0.873231 | 0.001144 |
| STAMBPL1  | 0.646891 | 0.455055 | 0.919598 | 0.015225 |
| CH25H     | 1.499732 | 1.011475 | 2.223679 | 0.043723 |
| ATAD1     | 0.939257 | 0.608645 | 1.449455 | 0.777101 |
| KIF11     | 0.981213 | 0.720371 | 1.336506 | 0.904256 |
| DUSP5     | 1.214505 | 0.996876 | 1.479645 | 0.053743 |
| CALHM2    | 1.272213 | 1.005822 | 1.609156 | 0.044602 |
| ARL3      | 1.163264 | 0.755599 | 1.790873 | 0.492109 |
| CEP55     | 1.071756 | 0.836884 | 1.372545 | 0.582957 |
| KIF20B    | 1.224951 | 0.883633 | 1.698107 | 0.223384 |
| ENTPD1    | 0.919606 | 0.686227 | 1.232355 | 0.574705 |
| EXOC6     | 0.920629 | 0.560321 | 1.512628 | 0.744102 |
| PLCE1     | 0.845476 | 0.488362 | 1.463728 | 0.548888 |
| DBR1      | 1.094822 | 0.65007  | 1.843855 | 0.733387 |
| DNAJC13   | 0.844339 | 0.591393 | 1.205473 | 0.351672 |
| GPR87     | 0.995204 | 0.727005 | 1.362343 | 0.976059 |
| ANXA7     | 1.35964  | 0.743213 | 2.487334 | 0.318797 |
| FAM149B1  | 0.803986 | 0.520116 | 1.242786 | 0.326187 |
| ASCC1     | 2.734537 | 1.441082 | 5.188944 | 0.002084 |
| ADAMTS1   | 1.020671 | 0.865682 | 1.203408 | 0.807632 |
| RPS24     | 0.92724  | 0.586519 | 1.465891 | 0.746487 |
| TET1      | 1.123462 | 0.919986 | 1.371941 | 0.253487 |
| DNA2      | 1.055166 | 0.74051  | 1.503527 | 0.766305 |
| AOX1      | 0.970885 | 0.773237 | 1.219055 | 0.799174 |
| ATIC      | 1.388726 | 0.927415 | 2.0795   | 0.110901 |
| SMARCAL1  | 0.995135 | 0.624158 | 1.586607 | 0.983652 |
| BARD1     | 1.088443 | 0.754859 | 1.569442 | 0.649924 |
| STAT4     | 1.160006 | 0.945178 | 1.423662 | 0.155493 |
| ASNSD1    | 1.006266 | 0.622022 | 1.627871 | 0.979693 |
| METTL5    | 1.793393 | 0.919731 | 3.496954 | 0.086459 |
| SSB       | 1.143946 | 0.73625  | 1.777403 | 0.549744 |
| NAB1      | 1.037578 | 0.689358 | 1.561698 | 0.859644 |
| PIIG      | 1.074348 | 0.653215 | 1.766988 | 0.777569 |
| FASTKD1   | 1.120826 | 0.704814 | 1.782387 | 0.629849 |
| IDH1      | 1.421162 | 1.013607 | 1.992589 | 0.041515 |
| OLA1      | 0.98879  | 0.613667 | 1.593219 | 0.963057 |
| CIR1      | 1.052636 | 0.626874 | 1.767568 | 0.846192 |
| FAM117B   | 0.993318 | 0.71055  | 1.388616 | 0.968714 |
| WDR12     | 0.993262 | 0.645648 | 1.528029 | 0.975458 |
| ABI2      | 0.868297 | 0.691638 | 1.090079 | 0.223678 |
| ITGAV     | 1.004212 | 0.813659 | 1.239392 | 0.968768 |
| SLC40A1   | 1.092648 | 0.954912 | 1.25025  | 0.197449 |
| SLC35A5   | 1.191801 | 0.779475 | 1.822239 | 0.417967 |
| SENP7     | 0.618033 | 0.41999  | 0.90946  | 0.014628 |
| COX17     | 1.241644 | 0.677961 | 2.273994 | 0.483271 |
| PARP9     | 1.286351 | 0.975126 | 1.696908 | 0.074793 |
| MNS1      | 0.962676 | 0.690396 | 1.342339 | 0.82256  |
| USP8      | 0.909354 | 0.548362 | 1.507989 | 0.71272  |
| SECISBP2L | 0.788829 | 0.525051 | 1.185127 | 0.253396 |
| TMOD3     | 1.088452 | 0.672309 | 1.762179 | 0.730248 |
| SPPL2A    | 1.08022  | 0.676928 | 1.723782 | 0.746235 |
| GLCE      | 1.169806 | 0.812294 | 1.684668 | 0.399337 |
| SHF       | 0.804775 | 0.628432 | 1.0306   | 0.08523  |
| APH1B     | 0.882274 | 0.559271 | 1.391826 | 0.590225 |
| PARP16    | 1.184146 | 0.740857 | 1.892674 | 0.479944 |
| PPCDC     | 1.895143 | 1.248521 | 2.876658 | 0.002679 |
| SEMA7A    | 1.104588 | 0.921053 | 1.324695 | 0.283301 |

|          |          |          |          |          |
|----------|----------|----------|----------|----------|
| UBL7     | 2.13437  | 1.356952 | 3.357182 | 0.001035 |
| ARHGAP24 | 1.099872 | 0.875461 | 1.381808 | 0.413581 |
| FAM13A   | 1.197944 | 0.828004 | 1.733169 | 0.337856 |
| HERC3    | 1.058158 | 0.622369 | 1.799091 | 0.834641 |
| HERC6    | 1.128427 | 0.817207 | 1.55817  | 0.463026 |
| HERC5    | 1.003359 | 0.805771 | 1.249399 | 0.976091 |
| PCDH10   | 0.953416 | 0.646185 | 1.406723 | 0.81004  |
| COPS4    | 0.995686 | 0.584553 | 1.695982 | 0.987306 |
| HNRNPD   | 1.047441 | 0.50927  | 2.154322 | 0.899752 |
| PRKG2    | 0.951177 | 0.775644 | 1.166433 | 0.630585 |
| RASGEF1B | 1.077777 | 0.891725 | 1.302648 | 0.438523 |
| SEC31A   | 0.588041 | 0.350526 | 0.986494 | 0.044275 |
| BBS7     | 1.501725 | 0.985954 | 2.287308 | 0.058216 |
| KIAA1109 | 0.85332  | 0.60386  | 1.205835 | 0.368617 |
| BMPR1B   | 1.07507  | 0.786645 | 1.469246 | 0.64969  |
| RAP1GDS1 | 1.260685 | 0.747883 | 2.125101 | 0.384559 |
| LARP1B   | 0.427452 | 0.26229  | 0.696616 | 0.000648 |
| MMRN1    | 1.141461 | 1.0055   | 1.295806 | 0.040881 |
| PDE5A    | 0.878541 | 0.623087 | 1.238728 | 0.460089 |
| PRDM5    | 1.09429  | 0.645395 | 1.855405 | 0.738019 |
| NAAA     | 1.202215 | 0.921327 | 1.56874  | 0.174958 |
| NUP54    | 0.721178 | 0.432046 | 1.203802 | 0.21115  |
| CXCL9    | 1.012439 | 0.817724 | 1.253521 | 0.909681 |
| BMP2K    | 0.760749 | 0.526113 | 1.100028 | 0.146143 |
| G3BP2    | 0.97754  | 0.59672  | 1.601396 | 0.928128 |
| FRAS1    | 0.474678 | 0.082714 | 2.724072 | 0.403249 |
| SCARB2   | 1.035402 | 0.676304 | 1.585169 | 0.872804 |
| CCNG2    | 0.799598 | 0.576905 | 1.108254 | 0.179331 |
| CNOT6L   | 0.840855 | 0.563134 | 1.25554  | 0.39676  |
| USO1     | 0.708826 | 0.479658 | 1.047485 | 0.084142 |
| ANXA3    | 1.017541 | 0.877801 | 1.179526 | 0.817543 |
| PPA2     | 1.088589 | 0.620075 | 1.9111   | 0.767532 |
| CENPE    | 0.903686 | 0.697113 | 1.171473 | 0.444393 |
| GSTCD    | 1.061259 | 0.689408 | 1.633677 | 0.787054 |
| INTS12   | 1.097997 | 0.626862 | 1.923225 | 0.743745 |
| CASP6    | 0.682299 | 0.494857 | 0.940739 | 0.019662 |
| LEF1     | 0.937727 | 0.775243 | 1.134268 | 0.507802 |
| HADH     | 1.264674 | 0.862802 | 1.853729 | 0.228755 |
| EGF      | 1.201693 | 0.997051 | 1.448336 | 0.053736 |
| PAPSS1   | 0.801243 | 0.526664 | 1.218976 | 0.300645 |
| SEC24B   | 0.670725 | 0.399029 | 1.127417 | 0.131722 |
| PPP3CA   | 0.916043 | 0.537591 | 1.560916 | 0.747085 |
| SLC39A8  | 0.854471 | 0.645439 | 1.1312   | 0.271889 |
| FBN2     | 0.875716 | 0.746343 | 1.027514 | 0.1037   |
| MAPK8IP3 | 1.128569 | 0.836132 | 1.523284 | 0.429289 |
| RGS3     | 0.923968 | 0.74225  | 1.150175 | 0.479105 |
| TTLL8    | 0.74418  | 0.37745  | 1.467225 | 0.39361  |
| RNF185   | 1.25639  | 0.684241 | 2.306961 | 0.461642 |
| PARVG    | 1.435602 | 0.964677 | 2.136419 | 0.074641 |
| B4GALNT3 | 1.170166 | 0.868865 | 1.575949 | 0.300879 |
| PDE6H    | 0.836315 | 0.614506 | 1.138187 | 0.255625 |
| ERP27    | 0.814398 | 0.574701 | 1.154069 | 0.248374 |
| ETV6     | 0.602781 | 0.417544 | 0.870197 | 0.006889 |
| GABARAPI | 0.922036 | 0.7407   | 1.147767 | 0.467543 |
| KIF21A   | 1.016481 | 0.780872 | 1.323179 | 0.903292 |
| CPNE8    | 1.265941 | 1.130051 | 1.418172 | 4.70E-05 |
| YARS2    | 0.884159 | 0.462642 | 1.689725 | 0.709469 |
| FGD4     | 1.176143 | 1.02037  | 1.355697 | 0.025212 |

|          |          |          |          |          |
|----------|----------|----------|----------|----------|
| ALG10    | 0.775971 | 0.525232 | 1.146411 | 0.202742 |
| AEBP2    | 0.585046 | 0.321842 | 1.063502 | 0.078739 |
| ETNK1    | 0.810612 | 0.503131 | 1.306005 | 0.388222 |
| ZCRB1    | 1.606057 | 0.933765 | 2.762385 | 0.086843 |
| TMEM117  | 1.172332 | 0.857954 | 1.601907 | 0.318203 |
| PRICKLE1 | 1.142604 | 0.936496 | 1.394072 | 0.189012 |
| C1RL     | 1.800199 | 1.28602  | 2.519959 | 0.000613 |
| NDUFA9   | 0.727063 | 0.362896 | 1.456673 | 0.368645 |
| CLSTN3   | 1.380783 | 1.047369 | 1.820335 | 0.022127 |
| KLRG1    | 1.41335  | 1.127977 | 1.77092  | 0.002643 |
| VAMP1    | 0.76575  | 0.560668 | 1.045848 | 0.093326 |
| TAPBPL   | 1.649668 | 1.130881 | 2.406447 | 0.009365 |
| CD27     | 1.124146 | 0.858651 | 1.471733 | 0.394587 |
| RBP5     | 1.282118 | 0.93552  | 1.757127 | 0.122234 |
| PEX5     | 1.138529 | 0.729095 | 1.777888 | 0.568315 |
| SLC38A4  | 0.876513 | 0.673612 | 1.14053  | 0.326525 |
| AMIGO2   | 0.993043 | 0.775495 | 1.271618 | 0.955869 |
| COL2A1   | 0.675565 | 0.516669 | 0.883329 | 0.004147 |
| LLPH     | 0.920343 | 0.505091 | 1.676985 | 0.786271 |
| INHBE    | 2.867745 | 0.799215 | 10.29005 | 0.106062 |
| GLIPR1   | 1.113046 | 0.876667 | 1.413162 | 0.379241 |
| PHLDA1   | 0.994706 | 0.802775 | 1.232524 | 0.96129  |
| TMEM19   | 1.434755 | 0.876557 | 2.348418 | 0.151032 |
| DUSP6    | 1.094379 | 0.937949 | 1.276899 | 0.251804 |
| TMTC3    | 0.955708 | 0.567844 | 1.608501 | 0.864573 |
| LUM      | 0.913737 | 0.766151 | 1.089752 | 0.315527 |
| SNRPF    | 1.311597 | 0.802821 | 2.142801 | 0.27879  |
| AMDHD1   | 1.092201 | 0.779299 | 1.530738 | 0.608589 |
| NEDD1    | 1.014148 | 0.642751 | 1.600147 | 0.951855 |
| SYCP3    | 0.750571 | 0.531907 | 1.059129 | 0.102467 |
| GAS2L3   | 1.233556 | 0.963086 | 1.579983 | 0.096487 |
| SLC15A4  | 1.256219 | 0.797999 | 1.977554 | 0.32448  |
| TDG      | 0.964254 | 0.597705 | 1.555593 | 0.881417 |
| SDSL     | 1.436199 | 1.146885 | 1.798494 | 0.00161  |
| MMAB     | 1.72238  | 0.986218 | 3.008051 | 0.055981 |
| GLTP     | 1.741491 | 1.151007 | 2.634901 | 0.00865  |
| GIT2     | 0.831981 | 0.504975 | 1.370746 | 0.470256 |
| TCHP     | 1.210889 | 0.66693  | 2.19851  | 0.529462 |
| MTMR6    | 0.871698 | 0.589192 | 1.289661 | 0.492027 |
| SLC46A3  | 1.037008 | 0.774895 | 1.387784 | 0.806881 |
| SLC7A1   | 1.053918 | 0.776599 | 1.430266 | 0.736054 |
| LNX2     | 1.134111 | 0.773465 | 1.662919 | 0.519261 |
| SUOX     | 0.940255 | 0.605944 | 1.459013 | 0.783463 |
| CCDC65   | 1.151642 | 0.774066 | 1.713393 | 0.486094 |
| SLC39A5  | 0.826867 | 0.427875 | 1.597919 | 0.571679 |
| TARBP2   | 1.294926 | 0.788081 | 2.127742 | 0.307709 |
| DHH      | 0.450504 | 0.183732 | 1.104624 | 0.081418 |
| ACVRL1   | 1.159846 | 0.917665 | 1.465941 | 0.214634 |
| GPR84    | 1.024796 | 0.843043 | 1.245733 | 0.805765 |
| N4BP2L1  | 0.700741 | 0.46339  | 1.059666 | 0.091928 |
| SMARCC2  | 1.148962 | 0.657333 | 2.008287 | 0.625996 |
| BRCA2    | 1.060625 | 0.753625 | 1.492687 | 0.735673 |
| MAP3K12  | 0.917365 | 0.619813 | 1.357761 | 0.666362 |
| ITGB7    | 1.389017 | 1.160049 | 1.663179 | 0.00035  |
| GALNT6   | 1.095819 | 0.750702 | 1.599597 | 0.635404 |
| CSAD     | 0.911903 | 0.588361 | 1.413361 | 0.679978 |
| LMBR1L   | 0.933549 | 0.63786  | 1.366311 | 0.723457 |
| ESYT1    | 0.884287 | 0.628394 | 1.244385 | 0.480473 |

|         |          |          |          |          |
|---------|----------|----------|----------|----------|
| TMBIM6  | 1.778494 | 0.994842 | 3.179442 | 0.052075 |
| ANKRD52 | 1.082811 | 0.660795 | 1.774345 | 0.7522   |
| ZNF740  | 1.571339 | 0.937585 | 2.633475 | 0.086282 |
| WDFY2   | 1.124331 | 0.756223 | 1.671623 | 0.562505 |
| HNRNPA1 | 0.882507 | 0.627267 | 1.241606 | 0.473025 |
| ESD     | 0.978233 | 0.59994  | 1.595061 | 0.9297   |
| RB1     | 1.129355 | 0.824871 | 1.546233 | 0.447921 |
| SBNO1   | 0.668172 | 0.418399 | 1.067053 | 0.091367 |
| MORN3   | 0.737715 | 0.547392 | 0.994211 | 0.045706 |
| SETD1B  | 1.037646 | 0.625581 | 1.721135 | 0.886184 |
| VPS33A  | 1.051836 | 0.513102 | 2.15622  | 0.890248 |
| VPS37B  | 1.445833 | 0.914681 | 2.285422 | 0.114516 |
| RHOF    | 1.520015 | 0.968584 | 2.385386 | 0.068586 |
| DENR    | 1.260761 | 0.758862 | 2.094607 | 0.370991 |
| DIAPH3  | 1.121159 | 0.791432 | 1.588256 | 0.51984  |
| SLAIN1  | 0.929574 | 0.785067 | 1.100681 | 0.396906 |
| RBM26   | 0.700605 | 0.404938 | 1.212154 | 0.203338 |
| MBNL2   | 1.029382 | 0.802027 | 1.321187 | 0.820096 |
| ABHD13  | 0.777426 | 0.47744  | 1.2659   | 0.311486 |
| RAB20   | 1.13007  | 0.85582  | 1.492206 | 0.38859  |
| GRTP1   | 0.638936 | 0.447542 | 0.91218  | 0.013664 |
| CUL4A   | 0.976546 | 0.599591 | 1.590488 | 0.924025 |
| CDH24   | 0.806707 | 0.662751 | 0.981931 | 0.032211 |
| REM2    | 1.600903 | 1.099186 | 2.331624 | 0.01417  |
| CBLN3   | 1.752478 | 1.201194 | 2.556773 | 0.003601 |
| TSSK4   | 0.816296 | 0.544439 | 1.223901 | 0.32598  |
| TMX1    | 0.888982 | 0.582769 | 1.356092 | 0.584939 |
| FRMD6   | 0.629342 | 0.473241 | 0.836933 | 0.001453 |
| PELI2   | 0.867867 | 0.67231  | 1.120307 | 0.276644 |
| RTN1    | 1.244455 | 1.045296 | 1.481561 | 0.013978 |
| SLC38A6 | 0.820257 | 0.49979  | 1.346208 | 0.433127 |
| RDH12   | 1.089816 | 0.681008 | 1.744031 | 0.719952 |
| RAB15   | 0.851479 | 0.612953 | 1.182827 | 0.337695 |
| WDR89   | 0.967644 | 0.677339 | 1.382372 | 0.856579 |
| ESR2    | 0.927124 | 0.64552  | 1.331578 | 0.682064 |
| STON2   | 0.988083 | 0.872306 | 1.119227 | 0.850455 |
| GPR65   | 1.132003 | 0.939388 | 1.364113 | 0.192606 |
| PTGR2   | 0.642974 | 0.406637 | 1.01667  | 0.058859 |
| JDP2    | 1.264956 | 0.984407 | 1.62546  | 0.066191 |
| AK7     | 0.696684 | 0.366279 | 1.325135 | 0.270557 |
| SLC24A4 | 1.016735 | 0.876816 | 1.178983 | 0.826098 |
| FBLN5   | 0.953288 | 0.760219 | 1.195391 | 0.678656 |
| WDR20   | 0.694743 | 0.367607 | 1.313002 | 0.262091 |
| NIPA2   | 1.427534 | 0.78895  | 2.582995 | 0.239408 |
| SLC12A6 | 1.139483 | 0.830797 | 1.562861 | 0.417929 |
| MFAP1   | 1.62732  | 0.980616 | 2.700519 | 0.059535 |
| TCF12   | 0.736811 | 0.502802 | 1.079731 | 0.117229 |
| SORD    | 0.733808 | 0.470086 | 1.14548  | 0.173139 |
| SERF2   | 1.994009 | 1.251212 | 3.177778 | 0.003702 |
| ZSCAN29 | 0.963992 | 0.633164 | 1.467677 | 0.864231 |
| LYSMD2  | 1.113021 | 0.692522 | 1.788849 | 0.658271 |
| SLC27A2 | 0.817902 | 0.675053 | 0.990979 | 0.040122 |
| HDC     | 0.895394 | 0.808919 | 0.991114 | 0.032989 |
| BNIP2   | 0.729047 | 0.465222 | 1.142484 | 0.16796  |
| GTF2A2  | 1.177738 | 0.755565 | 1.8358   | 0.470078 |
| SRP14   | 2.567549 | 1.444494 | 4.563747 | 0.001313 |
| BAHD1   | 1.058259 | 0.664422 | 1.685543 | 0.811543 |
| DISP2   | 0.855982 | 0.549859 | 1.332532 | 0.491046 |

|         |          |          |          |          |
|---------|----------|----------|----------|----------|
| CDAN1   | 0.799752 | 0.525482 | 1.217175 | 0.297042 |
| TLE3    | 1.242123 | 0.881214 | 1.750846 | 0.21573  |
| ANP32A  | 1.173376 | 0.634569 | 2.16968  | 0.610194 |
| COMMD4  | 1.416704 | 0.907667 | 2.211219 | 0.125159 |
| UBE2Q2  | 0.554224 | 0.340906 | 0.901026 | 0.017298 |
| PSTPIP1 | 1.11506  | 0.916362 | 1.356841 | 0.276743 |
| ETFA    | 1.458845 | 0.845469 | 2.517215 | 0.17483  |
| BCL2A1  | 1.24503  | 1.087242 | 1.425718 | 0.001526 |
| HMG20A  | 0.942913 | 0.598735 | 1.484939 | 0.799746 |
| SCAPER  | 0.897622 | 0.571526 | 1.409778 | 0.639127 |
| TSPAN3  | 0.673671 | 0.395824 | 1.146554 | 0.14542  |
| WDR61   | 1.074191 | 0.647959 | 1.780802 | 0.781403 |
| NCOA2   | 1.058859 | 0.759538 | 1.476138 | 0.735821 |
| NEIL1   | 1.121319 | 0.786065 | 1.599558 | 0.527521 |
| MAN2C1  | 1.01767  | 0.721122 | 1.436168 | 0.920612 |
| DNAJA4  | 1.107388 | 0.900127 | 1.362372 | 0.334658 |
| TPM1    | 1.115797 | 0.881038 | 1.413109 | 0.363297 |
| IGF1R   | 0.867979 | 0.746623 | 1.009061 | 0.06539  |
| ARRDC4  | 1.184804 | 0.911943 | 1.539307 | 0.204171 |
| PIF1    | 0.893358 | 0.682387 | 1.169553 | 0.411957 |
| USP3    | 1.150823 | 0.805278 | 1.644642 | 0.440625 |
| BBS4    | 0.897965 | 0.571964 | 1.409775 | 0.640028 |
| PML     | 1.111952 | 0.785757 | 1.573562 | 0.549177 |
| CYP1A1  | 2.378364 | 0.685606 | 8.250534 | 0.172187 |
| ADAMTS1 | 0.546995 | 0.298941 | 1.000879 | 0.050334 |
| LINS1   | 1.028558 | 0.618613 | 1.710167 | 0.913563 |
| ULK3    | 1.543829 | 1.038657 | 2.294702 | 0.031751 |
| PCSK6   | 1.216742 | 0.878348 | 1.685505 | 0.238061 |
| SCAMP2  | 2.219972 | 1.345238 | 3.663497 | 0.001806 |
| HAPLN3  | 1.114484 | 0.889817 | 1.395876 | 0.345351 |
| POLG    | 1.452026 | 0.88407  | 2.384856 | 0.140688 |
| RLBP1   | 1.220946 | 0.921599 | 1.617526 | 0.164213 |
| FANCI   | 1.019336 | 0.724265 | 1.434621 | 0.912542 |
| ABHD2   | 1.30775  | 0.953242 | 1.794098 | 0.096286 |
| DET1    | 0.568538 | 0.367172 | 0.880336 | 0.011365 |
| MFGE8   | 1.037614 | 0.875186 | 1.230188 | 0.670764 |
| ZNF710  | 1.249961 | 0.860035 | 1.816675 | 0.242179 |
| UNC45A  | 1.855338 | 1.174606 | 2.930581 | 0.00805  |
| MCTP2   | 0.898665 | 0.753957 | 1.071145 | 0.232973 |
| FURIN   | 1.115928 | 0.82398  | 1.511318 | 0.478436 |
| IQGAP1  | 1.062794 | 0.848685 | 1.330919 | 0.595707 |
| CRTC3   | 1.021726 | 0.704595 | 1.481595 | 0.909748 |
| SEC11A  | 1.211776 | 0.756813 | 1.940244 | 0.42383  |
| PMM2    | 0.65869  | 0.396852 | 1.093285 | 0.106317 |
| ITGAX   | 1.324186 | 1.145759 | 1.530399 | 0.000143 |
| TGFB111 | 0.951319 | 0.723206 | 1.251384 | 0.721256 |
| ARMC5   | 0.926268 | 0.74917  | 1.145229 | 0.479289 |
| PARN    | 1.101977 | 0.571617 | 2.124415 | 0.771852 |
| FTO     | 0.710036 | 0.502273 | 1.003739 | 0.052521 |
| UQCRC2  | 1.23166  | 0.705609 | 2.149896 | 0.463492 |
| CDR2    | 0.720607 | 0.483736 | 1.073466 | 0.107107 |
| IGSF6   | 1.111294 | 0.947487 | 1.30342  | 0.194639 |
| ARHGAP1 | 1.696091 | 1.058568 | 2.717562 | 0.028049 |
| NKD1    | 0.720864 | 0.5498   | 0.945152 | 0.01788  |
| DHX38   | 1.080612 | 0.698304 | 1.672227 | 0.727832 |
| TXNL4B  | 0.840539 | 0.466647 | 1.514004 | 0.562881 |
| ZFHX3   | 0.729112 | 0.587144 | 0.905406 | 0.004245 |
| CPNE2   | 1.029644 | 0.778207 | 1.362321 | 0.837957 |

|          |          |          |          |          |
|----------|----------|----------|----------|----------|
| NLRC5    | 1.04065  | 0.823287 | 1.3154   | 0.738892 |
| KATNB1   | 1.097228 | 0.822715 | 1.463335 | 0.527647 |
| KIFC3    | 1.144408 | 0.934    | 1.402215 | 0.193166 |
| ADAMTS1  | 0.660717 | 0.481838 | 0.906002 | 0.010089 |
| NUDT7    | 0.801835 | 0.602347 | 1.067388 | 0.130241 |
| GCSH     | 0.655241 | 0.373479 | 1.149572 | 0.14049  |
| CMTM3    | 1.431736 | 0.93064  | 2.202643 | 0.10249  |
| CMTM2    | 1.215942 | 1.000222 | 1.478188 | 0.049741 |
| NOL3     | 0.932245 | 0.684189 | 1.270235 | 0.656683 |
| MAP1LC3F | 1.193596 | 0.750918 | 1.89724  | 0.454186 |
| MBTPS1   | 0.670267 | 0.467378 | 0.961231 | 0.029637 |
| ZCCHC14  | 0.884229 | 0.680223 | 1.149417 | 0.357887 |
| OSGIN1   | 0.733087 | 0.439111 | 1.223874 | 0.235075 |
| IRF8     | 1.17789  | 1.042799 | 1.330481 | 0.008432 |
| RHOT2    | 1.168124 | 0.83758  | 1.629114 | 0.359856 |
| RPL3L    | 2.231898 | 1.272579 | 3.914388 | 0.005096 |
| RPS2     | 1.198738 | 0.836755 | 1.717315 | 0.323014 |
| NDUFB10  | 2.201778 | 1.320742 | 3.670535 | 0.002471 |
| PDPK1    | 1.131324 | 0.635    | 2.015581 | 0.675397 |
| TIGD7    | 1.096577 | 0.648616 | 1.85392  | 0.730762 |
| DEF8     | 1.026742 | 0.758221 | 1.390359 | 0.864527 |
| TCF25    | 1.142179 | 0.69031  | 1.889838 | 0.604856 |
| GALNS    | 0.835525 | 0.623054 | 1.120453 | 0.230031 |
| GAS8     | 0.774595 | 0.558295 | 1.074695 | 0.126317 |
| MED9     | 1.876339 | 1.075944 | 3.272147 | 0.026559 |
| NCOR1    | 0.892904 | 0.559389 | 1.425265 | 0.634954 |
| COPS3    | 0.910404 | 0.580869 | 1.426888 | 0.682235 |
| ZNF287   | 1.135464 | 0.790557 | 1.630848 | 0.491626 |
| KSR1     | 1.160167 | 0.885961 | 1.51924  | 0.280204 |
| RANBP10  | 1.004794 | 0.665895 | 1.516172 | 0.981821 |
| DPEP3    | 1.067309 | 0.908969 | 1.253231 | 0.426586 |
| GFOD2    | 0.697956 | 0.41882  | 1.163132 | 0.167578 |
| NOB1     | 1.020006 | 0.688665 | 1.510765 | 0.921269 |
| PRPSAP2  | 1.396774 | 0.778061 | 2.507487 | 0.262989 |
| PCTP     | 1.303333 | 0.929093 | 1.828317 | 0.125009 |
| TOM1L1   | 1.110901 | 0.883497 | 1.396837 | 0.368126 |
| TOB1     | 1.072701 | 0.809342 | 1.421757 | 0.625363 |
| VPS53    | 0.8098   | 0.526055 | 1.246591 | 0.337798 |
| SGSM2    | 1.074429 | 0.774374 | 1.490749 | 0.667453 |
| NPEPPS   | 0.523425 | 0.28225  | 0.970679 | 0.039936 |
| SKAP1    | 1.095101 | 0.903914 | 1.326726 | 0.353398 |
| LRRC46   | 1.090213 | 0.713825 | 1.665065 | 0.689345 |
| SCRN2    | 1.147777 | 0.784401 | 1.67949  | 0.477922 |
| SSH2     | 1.041139 | 0.769326 | 1.408987 | 0.793965 |
| RHBDL3   | 1.038379 | 0.836533 | 1.288929 | 0.73273  |
| ARSG     | 0.993856 | 0.728023 | 1.356758 | 0.969046 |
| G6PC3    | 1.222895 | 0.824064 | 1.814751 | 0.317731 |
| CLTC     | 1.096501 | 0.72033  | 1.669115 | 0.667392 |
| BCAS3    | 0.656997 | 0.385593 | 1.119432 | 0.122343 |
| PTRH2    | 0.910876 | 0.537025 | 1.544983 | 0.729133 |
| SS18     | 0.654018 | 0.371564 | 1.151187 | 0.141044 |
| TAF4B    | 0.942089 | 0.718818 | 1.234709 | 0.665553 |
| AFG3L2   | 1.169967 | 0.697708 | 1.961885 | 0.551723 |
| IMPA2    | 1.044926 | 0.631394 | 1.729301 | 0.864243 |
| GNAL     | 1.286286 | 0.643933 | 2.569415 | 0.475756 |
| SLC39A6  | 0.831108 | 0.566805 | 1.218657 | 0.343472 |
| RPRD1A   | 0.837071 | 0.490822 | 1.427578 | 0.513775 |
| GALNT1   | 0.571919 | 0.410673 | 0.796475 | 0.000944 |

|           |          |          |          |          |
|-----------|----------|----------|----------|----------|
| ADCYAP1   | 1.061795 | 0.808676 | 1.394142 | 0.666063 |
| ESCO1     | 0.790122 | 0.472661 | 1.320805 | 0.368871 |
| OSBPL1A   | 1.030944 | 0.833801 | 1.274699 | 0.778381 |
| PELP1     | 1.071938 | 0.67915  | 1.691896 | 0.765446 |
| NPC1      | 1.230944 | 0.810028 | 1.870579 | 0.330464 |
| SLC14A1   | 0.711074 | 0.590275 | 0.856594 | 0.000331 |
| ARRB2     | 1.249313 | 0.973357 | 1.603504 | 0.080479 |
| ZMYND15   | 1.153802 | 0.894278 | 1.488639 | 0.271133 |
| MINK1     | 1.670457 | 1.123828 | 2.482966 | 0.011173 |
| SAT2      | 0.955098 | 0.671824 | 1.357813 | 0.797998 |
| ASGR1     | 1.23008  | 0.886032 | 1.707724 | 0.216052 |
| PIK3R5    | 1.47584  | 1.13419  | 1.920405 | 0.003764 |
| TP53      | 1.127047 | 0.747822 | 1.698581 | 0.567679 |
| ARHGDI1A  | 1.423209 | 1.018822 | 1.988105 | 0.038518 |
| TMC6      | 1.183686 | 0.870208 | 1.610089 | 0.282689 |
| SLC16A3   | 1.275407 | 1.031606 | 1.576826 | 0.024612 |
| CARD14    | 1.267361 | 0.711743 | 2.256719 | 0.420898 |
| TTYH2     | 1.245761 | 0.95381  | 1.627075 | 0.106774 |
| RAB40B    | 0.832958 | 0.573149 | 1.210539 | 0.337941 |
| EIF4A3    | 1.37731  | 0.82555  | 2.297841 | 0.220247 |
| CSNK1D    | 1.229224 | 0.766463 | 1.971382 | 0.391798 |
| ANAPC11   | 1.210486 | 0.800775 | 1.829823 | 0.364884 |
| TBCD      | 0.967381 | 0.642181 | 1.457262 | 0.873954 |
| FN3KRP    | 1.241789 | 0.688025 | 2.241255 | 0.472267 |
| NARF      | 0.800383 | 0.528571 | 1.21197  | 0.292879 |
| RPTOR     | 0.773336 | 0.556802 | 1.074078 | 0.125129 |
| FOXK2     | 0.92722  | 0.549834 | 1.563631 | 0.776863 |
| TRIM65    | 0.88835  | 0.526172 | 1.499825 | 0.657734 |
| CBX8      | 0.778529 | 0.518908 | 1.168044 | 0.226466 |
| SECTM1    | 1.153071 | 1.027258 | 1.294293 | 0.015684 |
| RNF157    | 1.036766 | 0.744714 | 1.443351 | 0.830636 |
| ZNF750    | 0.680183 | 0.459305 | 1.007282 | 0.054386 |
| CBX4      | 0.969544 | 0.653299 | 1.438874 | 0.877963 |
| RNF165    | 1.074096 | 0.811071 | 1.422418 | 0.617933 |
| DYM       | 0.670612 | 0.396599 | 1.133941 | 0.135979 |
| ELAC1     | 1.198593 | 0.611062 | 2.351032 | 0.598192 |
| MBD1      | 1.020837 | 0.612988 | 1.700045 | 0.936834 |
| SMAD4     | 0.627769 | 0.365096 | 1.079425 | 0.092261 |
| TNFRSF11A | 1.130513 | 0.916416 | 1.394629 | 0.252147 |
| ZCCHC2    | 1.372993 | 0.949215 | 1.985966 | 0.092334 |
| PMAIP1    | 1.030518 | 0.812012 | 1.307821 | 0.804717 |
| ERBB2     | 1.243396 | 0.78321  | 1.973969 | 0.355602 |
| PNMT      | 1.033329 | 0.806784 | 1.323488 | 0.795136 |
| ARL5C     | 1.103933 | 0.905692 | 1.345567 | 0.327527 |
| IGFBP4    | 0.918487 | 0.794757 | 1.061481 | 0.249421 |
| FKBP10    | 0.794174 | 0.618078 | 1.020443 | 0.071585 |
| TXNL4A    | 1.095648 | 0.510469 | 2.351651 | 0.814667 |
| SAMD1     | 1.263915 | 0.83965  | 1.902558 | 0.261685 |
| BRD4      | 1.358308 | 0.695588 | 2.652432 | 0.369789 |
| SLC39A3   | 0.873834 | 0.665001 | 1.148247 | 0.333103 |
| NFIC      | 0.796027 | 0.475362 | 1.333003 | 0.385811 |
| PRDM15    | 0.998598 | 0.659031 | 1.513129 | 0.994722 |
| PFKL      | 1.82646  | 1.276723 | 2.612906 | 0.000977 |
| FEM1A     | 0.989228 | 0.538233 | 1.818121 | 0.972178 |
| VAV1      | 1.718106 | 1.076446 | 2.742255 | 0.023283 |
| CIB3      | 0.790724 | 0.613022 | 1.019938 | 0.070614 |
| SH3GL1    | 1.243511 | 0.866449 | 1.784663 | 0.237088 |
| DUS3L     | 1.013608 | 0.734729 | 1.398341 | 0.934382 |



|           |          |          |          |          |
|-----------|----------|----------|----------|----------|
| DPP9      | 1.322436 | 0.844709 | 2.070343 | 0.221695 |
| CCDC97    | 1.687113 | 1.012604 | 2.810924 | 0.044638 |
| TMEM91    | 1.250565 | 0.821471 | 1.903796 | 0.297043 |
| ZFP14     | 0.73306  | 0.504393 | 1.065394 | 0.103548 |
| SIRT3     | 0.861531 | 0.55125  | 1.346458 | 0.512972 |
| IFITM3    | 1.117803 | 0.994889 | 1.255903 | 0.060965 |
| COL6A1    | 0.997136 | 0.868604 | 1.144687 | 0.967508 |
| IFNAR1    | 1.059145 | 0.675672 | 1.660254 | 0.802165 |
| SOD1      | 1.632508 | 1.065597 | 2.501023 | 0.02433  |
| COL6A2    | 0.986574 | 0.843095 | 1.15447  | 0.866129 |
| SIK1      | 1.364994 | 1.02864  | 1.811334 | 0.031116 |
| TRPM2     | 1.10291  | 0.898693 | 1.353532 | 0.348465 |
| SCYL1     | 1.53979  | 1.010424 | 2.346493 | 0.044621 |
| TMEM50B   | 0.466495 | 0.266394 | 0.8169   | 0.007643 |
| APP       | 0.905843 | 0.827049 | 0.992144 | 0.033186 |
| URB1      | 1.12865  | 0.781929 | 1.629112 | 0.518088 |
| AKT1      | 1.26033  | 0.844515 | 1.880879 | 0.257351 |
| EMP3      | 1.344033 | 1.08009  | 1.672474 | 0.008034 |
| SAE1      | 1.630609 | 0.927895 | 2.865504 | 0.089169 |
| NTN5      | 1.033244 | 0.699307 | 1.526644 | 0.869576 |
| LMTK3     | 1.033232 | 0.676109 | 1.578987 | 0.879909 |
| GEMIN7    | 1.320413 | 0.857513 | 2.033195 | 0.206948 |
| ADAMTS1   | 1.045682 | 0.904329 | 1.209128 | 0.546621 |
| RNPEPL1   | 1.642895 | 1.214086 | 2.223158 | 0.001295 |
| CAPN10    | 1.333433 | 0.871318 | 2.040639 | 0.185017 |
| MYO1F     | 1.306281 | 1.024005 | 1.666369 | 0.031482 |
| NLRP12    | 1.130794 | 1.005177 | 1.27211  | 0.040766 |
| ZNF787    | 1.310683 | 0.869618 | 1.975451 | 0.196169 |
| CARM1     | 1.408031 | 0.940292 | 2.108443 | 0.096691 |
| EVI5L     | 1.43777  | 0.960302 | 2.152638 | 0.077858 |
| SLC47A1   | 1.102165 | 0.793071 | 1.531727 | 0.562386 |
| PSMB6     | 1.488083 | 0.93768  | 2.361563 | 0.091625 |
| GPR32     | 0.930884 | 0.776953 | 1.115313 | 0.437397 |
| SIGLEC10  | 1.191808 | 0.996109 | 1.425956 | 0.055192 |
| ZNF473    | 0.872236 | 0.535233 | 1.421431 | 0.583275 |
| FAM71E1   | 0.765298 | 0.461033 | 1.270368 | 0.300912 |
| RPS11     | 1.256043 | 0.781309 | 2.019233 | 0.346635 |
| PTH2      | 1.106495 | 0.74152  | 1.651109 | 0.620214 |
| RPL13A    | 1.199791 | 0.809332 | 1.778625 | 0.364511 |
| NOSIP     | 1.480008 | 0.943809 | 2.320833 | 0.087634 |
| RCN3      | 1.065031 | 0.889456 | 1.275264 | 0.493052 |
| ZNF614    | 0.916231 | 0.628457 | 1.335778 | 0.649232 |
| SLC2A5    | 1.348528 | 1.145848 | 1.587059 | 0.00032  |
| RERE      | 1.281858 | 0.841518 | 1.952613 | 0.247518 |
| PRDM16    | 1.227633 | 1.097255 | 1.373504 | 0.000343 |
| PADI3     | 1.264028 | 1.083161 | 1.475095 | 0.00294  |
| EPHA2     | 1.168165 | 0.932816 | 1.462892 | 0.175709 |
| ARHGEF19  | 1.227301 | 0.853808 | 1.764175 | 0.268602 |
| EFHD2     | 1.511398 | 1.157026 | 1.974306 | 0.002446 |
| PEX14     | 1.399817 | 0.850486 | 2.303961 | 0.185848 |
| PGD       | 1.474752 | 1.046793 | 2.077674 | 0.02632  |
| SH3BGRL3  | 1.689665 | 1.305546 | 2.1868   | 6.72E-05 |
| CNKSR1    | 1.027393 | 0.710443 | 1.485743 | 0.885828 |
| RPL11     | 1.124426 | 0.690633 | 1.830689 | 0.637236 |
| KIAA0319L | 1.046869 | 0.604646 | 1.812524 | 0.870086 |
| PLK4      | 1.000595 | 0.729824 | 1.371825 | 0.997051 |
| MAP3K6    | 1.401112 | 1.116175 | 1.758787 | 0.003644 |
| GPN2      | 2.250161 | 1.135973 | 4.457169 | 0.020043 |

|          |          |          |          |          |
|----------|----------|----------|----------|----------|
| SYTL1    | 1.179618 | 0.930944 | 1.494718 | 0.171447 |
| WDTC1    | 1.006383 | 0.634548 | 1.596109 | 0.978427 |
| NBPF3    | 0.788509 | 0.626873 | 0.991823 | 0.042345 |
| HSPG2    | 0.94452  | 0.805908 | 1.106974 | 0.480882 |
| ITGB3BP  | 0.730561 | 0.456604 | 1.16889  | 0.19047  |
| SERBP1   | 1.055752 | 0.693292 | 1.607709 | 0.800391 |
| BCL10    | 1.573212 | 0.925515 | 2.674183 | 0.094131 |
| PRKACB   | 1.02936  | 0.743795 | 1.424562 | 0.861434 |
| PIGK     | 0.938438 | 0.59553  | 1.478792 | 0.784205 |
| TINAGL1  | 1.064105 | 0.805847 | 1.40513  | 0.661338 |
| RPS8     | 1.455649 | 0.94963  | 2.231305 | 0.084922 |
| KIF2C    | 1.164023 | 0.849467 | 1.595059 | 0.344689 |
| PTPRF    | 0.815333 | 0.641003 | 1.037076 | 0.09624  |
| BEST4    | 2.035095 | 1.139035 | 3.636071 | 0.016413 |
| LMO4     | 1.018336 | 0.848578 | 1.222053 | 0.845174 |
| MTF2     | 0.685215 | 0.473319 | 0.991971 | 0.045212 |
| IGSF3    | 0.875525 | 0.51981  | 1.47466  | 0.617261 |
| ZNF697   | 0.790141 | 0.612731 | 1.018918 | 0.069446 |
| CTTNBP2N | 1.234883 | 0.985607 | 1.547206 | 0.066663 |
| PSMA5    | 1.951338 | 1.113269 | 3.420306 | 0.019559 |
| FNDC7    | 1.430985 | 0.518821 | 3.946865 | 0.488749 |
| CD53     | 1.206115 | 0.876488 | 1.659708 | 0.249907 |
| CELSR2   | 1.366483 | 1.003195 | 1.861329 | 0.047682 |
| ITGA10   | 1.268139 | 0.738643 | 2.177205 | 0.389006 |
| GPR161   | 0.864417 | 0.583508 | 1.28056  | 0.467449 |
| ALDH9A1  | 1.168262 | 0.740698 | 1.842634 | 0.503553 |
| ATP1B1   | 0.864927 | 0.729962 | 1.024846 | 0.093653 |
| TIPRL    | 0.955176 | 0.553729 | 1.647668 | 0.869056 |
| NME7     | 0.791676 | 0.517802 | 1.210405 | 0.280845 |
| POGK     | 1.064464 | 0.61533  | 1.841424 | 0.823219 |
| CREG1    | 1.565939 | 0.999335 | 2.453798 | 0.05034  |
| DCAF6    | 0.770214 | 0.482002 | 1.230764 | 0.274949 |
| GPA33    | 1.054827 | 0.917    | 1.213371 | 0.454983 |
| TBX19    | 0.822505 | 0.533551 | 1.267947 | 0.376219 |
| UCK2     | 0.728137 | 0.514278 | 1.030928 | 0.073731 |
| TMCO1    | 0.922466 | 0.469136 | 1.81385  | 0.815033 |
| XCL1     | 1.087427 | 0.765839 | 1.544057 | 0.63939  |
| XCL2     | 1.16591  | 0.932861 | 1.45718  | 0.177294 |
| POU2F1   | 0.880443 | 0.52571  | 1.474539 | 0.628419 |
| ILDR2    | 1.183372 | 0.964572 | 1.451803 | 0.106494 |
| MGST3    | 1.051036 | 0.673959 | 1.639085 | 0.826222 |
| ADCY10   | 1.101715 | 0.632017 | 1.920479 | 0.732614 |
| UFC1     | 1.164184 | 0.662717 | 2.045102 | 0.596927 |
| PPOX     | 1.005019 | 0.713983 | 1.414687 | 0.977106 |
| FCGR2A   | 1.024168 | 0.888468 | 1.180594 | 0.741933 |
| NUF2     | 0.908035 | 0.672815 | 1.225489 | 0.528257 |
| RGS5     | 0.994791 | 0.587192 | 1.685327 | 0.98451  |
| SDHC     | 1.376233 | 0.700587 | 2.703473 | 0.353913 |
| PFDN2    | 1.609397 | 0.98333  | 2.634069 | 0.058346 |
| NR1I3    | 1.091847 | 0.728452 | 1.636525 | 0.670434 |
| USP21    | 1.17971  | 0.67203  | 2.070912 | 0.564864 |
| PRCC     | 1.984381 | 1.064638 | 3.698691 | 0.030997 |
| FCRL5    | 0.98821  | 0.767693 | 1.272071 | 0.926654 |
| MRPL24   | 1.91201  | 1.093973 | 3.34175  | 0.022891 |
| PIGM     | 1.079823 | 0.705722 | 1.652233 | 0.723423 |
| CASQ1    | 0.816736 | 0.495035 | 1.347495 | 0.428092 |
| ISG20L2  | 2.167281 | 1.16625  | 4.02753  | 0.014429 |
| CRABP2   | 1.299759 | 0.959986 | 1.759788 | 0.089919 |

|          |          |          |          |          |
|----------|----------|----------|----------|----------|
| HDGF     | 1.172278 | 0.71639  | 1.918277 | 0.527006 |
| ABL2     | 0.78734  | 0.49815  | 1.244411 | 0.305964 |
| XPR1     | 1.08978  | 0.687466 | 1.727532 | 0.71455  |
| RGS16    | 1.024846 | 0.766294 | 1.370634 | 0.868589 |
| TOR1AIP1 | 0.756511 | 0.470901 | 1.215348 | 0.248647 |
| RGL1     | 1.274921 | 0.997212 | 1.629968 | 0.052661 |
| LYPLAL1  | 0.622789 | 0.381336 | 1.017124 | 0.058475 |
| LHX9     | 0.045805 | 2.14E-06 | 980.0384 | 0.544457 |
| TUFT1    | 1.24138  | 0.944634 | 1.631347 | 0.120827 |
| SF3B4    | 1.548573 | 0.934844 | 2.565215 | 0.089447 |
| ECM1     | 0.997794 | 0.856449 | 1.162464 | 0.977389 |
| ZNF687   | 1.496922 | 0.919882 | 2.435939 | 0.104415 |
| TARS2    | 1.197439 | 0.704283 | 2.035915 | 0.505807 |
| SNX27    | 0.91948  | 0.608441 | 1.389523 | 0.69028  |
| SETDB1   | 0.678925 | 0.389267 | 1.184121 | 0.172417 |
| ADAMTSL  | 1.073347 | 0.90079  | 1.27896  | 0.428627 |
| MCL1     | 0.956261 | 0.730729 | 1.251401 | 0.744516 |
| CTSK     | 0.771256 | 0.510397 | 1.165439 | 0.217533 |
| RFX5     | 1.620309 | 1.016072 | 2.583874 | 0.04267  |
| PI4KB    | 1.717195 | 0.986135 | 2.990217 | 0.056053 |
| PIP5K1A  | 1.190855 | 0.59107  | 2.399266 | 0.625035 |
| ANP32E   | 0.865543 | 0.592576 | 1.264251 | 0.455075 |
| ANXA9    | 1.09196  | 0.739333 | 1.612775 | 0.658387 |
| SELENBP1 | 0.908767 | 0.795989 | 1.037524 | 0.157045 |
| ENSA     | 2.227382 | 0.970966 | 5.109582 | 0.058703 |
| SEMA6C   | 0.975876 | 0.764096 | 1.246352 | 0.844888 |
| MRPL9    | 1.738345 | 0.928576 | 3.254275 | 0.083928 |
| ARNT     | 0.912596 | 0.534548 | 1.55801  | 0.737511 |
| POGZ     | 0.924288 | 0.549771 | 1.553935 | 0.766447 |
| HORMAD   | 1.084713 | 0.894772 | 1.314974 | 0.407719 |
| GOLPH3L  | 0.865095 | 0.569823 | 1.313371 | 0.49632  |
| GABPB2   | 1.08736  | 0.631209 | 1.873152 | 0.762788 |
| DTL      | 1.13163  | 0.843431 | 1.518308 | 0.409622 |
| DYRK3    | 1.004873 | 0.82356  | 1.226105 | 0.961807 |
| INTS7    | 1.25805  | 0.794453 | 1.992176 | 0.327663 |
| VASH2    | 0.675002 | 0.43394  | 1.049979 | 0.081227 |
| TAF1A    | 0.822879 | 0.525402 | 1.288784 | 0.39441  |
| SMYD2    | 0.928226 | 0.654355 | 1.316722 | 0.676294 |
| SUSD4    | 0.962517 | 0.493164 | 1.878562 | 0.910845 |
| DUSP10   | 0.817655 | 0.625812 | 1.068308 | 0.140044 |
| TP53BP2  | 0.681219 | 0.430665 | 1.077541 | 0.100848 |
| ATP8B2   | 1.072238 | 0.852638 | 1.348396 | 0.550829 |
| ADAM15   | 1.608716 | 1.199315 | 2.15787  | 0.001509 |
| JTB      | 1.466538 | 0.923579 | 2.328695 | 0.104591 |
| RAB13    | 1.102815 | 0.839991 | 1.447875 | 0.481058 |
| S100A8   | 1.085922 | 1.007375 | 1.170594 | 0.031415 |
| TPM3     | 1.817422 | 1.064178 | 3.103825 | 0.028688 |
| NUP210L  | 0.797152 | 0.482738 | 1.31635  | 0.375672 |
| SNAPIN   | 2.454275 | 1.390714 | 4.331204 | 0.001948 |
| SLC27A3  | 1.011498 | 0.785648 | 1.302274 | 0.929335 |
| UBAP2L   | 1.249062 | 0.674581 | 2.312776 | 0.479234 |
| SLC39A1  | 1.750891 | 0.802094 | 3.822016 | 0.159638 |
| HAX1     | 1.905605 | 0.952817 | 3.811152 | 0.068259 |
| CREB3L4  | 0.834848 | 0.600192 | 1.161248 | 0.283688 |
| EFNA3    | 1.285248 | 0.821985 | 2.009601 | 0.271164 |
| AQP10    | 1.287191 | 0.839461 | 1.97372  | 0.247034 |
| GATAD2B  | 1.003309 | 0.541491 | 1.858991 | 0.991625 |
| ILF2     | 1.079544 | 0.676237 | 1.723385 | 0.748428 |

|                      |          |          |          |          |
|----------------------|----------|----------|----------|----------|
| RIT1                 | 1.213029 | 0.802746 | 1.833005 | 0.359222 |
| INTS3                | 1.476606 | 0.90424  | 2.411266 | 0.119313 |
| PKLR                 | 0.921459 | 0.787826 | 1.077758 | 0.306201 |
| HCN3                 | 1.152395 | 0.833433 | 1.593426 | 0.390934 |
| ACTA1                | 1.598752 | 0.845153 | 3.024314 | 0.149107 |
| GALNT2               | 0.850548 | 0.576734 | 1.25436  | 0.41413  |
| TTC13                | 1.079039 | 0.728664 | 1.59789  | 0.704128 |
| SCCPDH               | 0.683444 | 0.502004 | 0.930462 | 0.015614 |
| LYST                 | 0.844148 | 0.70269  | 1.014084 | 0.070216 |
| CEP170               | 0.540365 | 0.363093 | 0.804184 | 0.002411 |
| ACP1                 | 0.907309 | 0.504679 | 1.631157 | 0.745159 |
| SNAP47               | 1.936472 | 1.240264 | 3.023489 | 0.003647 |
| SRP9                 | 1.035345 | 0.633091 | 1.693184 | 0.889918 |
| NVL                  | 0.97319  | 0.498395 | 1.900298 | 0.936558 |
| DEGS1                | 1.690426 | 1.031995 | 2.768948 | 0.037065 |
| FBXO28               | 0.764454 | 0.416582 | 1.402823 | 0.385857 |
| ARF1                 | 1.426639 | 0.950588 | 2.141096 | 0.086285 |
| CNIH4                | 1.260562 | 0.901645 | 1.762353 | 0.175613 |
| ITPKB                | 1.249764 | 0.822122 | 1.899852 | 0.296779 |
| GUK1                 | 1.38531  | 0.991782 | 1.934987 | 0.055932 |
| CDC42BP <del>A</del> | 0.977015 | 0.834607 | 1.143722 | 0.772361 |
| CNIH3                | 0.477546 | 0.272317 | 0.837444 | 0.009909 |
| MBOAT2               | 1.116595 | 0.959023 | 1.300056 | 0.155348 |
| PARP1                | 1.539295 | 1.015869 | 2.332416 | 0.041929 |
| PYCR2                | 1.974645 | 1.115657 | 3.495    | 0.019509 |
| LBR                  | 0.686522 | 0.505044 | 0.933211 | 0.016338 |
| WNT9A                | 1.122784 | 0.660018 | 1.910014 | 0.669214 |
| EPHX1                | 0.767924 | 0.562799 | 1.047813 | 0.095833 |
| REN                  | 1.269737 | 0.914456 | 1.763049 | 0.153873 |
| SOX13                | 0.908702 | 0.720517 | 1.146036 | 0.418721 |
| ETNK2                | 0.964883 | 0.585685 | 1.589592 | 0.888386 |
| PPFIA4               | 1.182681 | 0.980486 | 1.426571 | 0.079438 |
| PLEKHA6              | 1.201567 | 0.996384 | 1.449004 | 0.0546   |
| PTPN7                | 1.406588 | 1.069059 | 1.850683 | 0.014811 |
| SYT2                 | 1.109317 | 0.751674 | 1.637126 | 0.601358 |
| ARL8A                | 1.310286 | 0.919236 | 1.867692 | 0.135093 |
| GDF7                 | 0.799309 | 0.500101 | 1.277533 | 0.349141 |
| PDIA6                | 0.791529 | 0.569286 | 1.100534 | 0.164441 |
| RHOB                 | 0.990396 | 0.853007 | 1.149914 | 0.899214 |
| ATP6V1C2             | 0.514531 | 0.310022 | 0.853948 | 0.010147 |
| GALM                 | 1.421611 | 1.10836  | 1.823396 | 0.005604 |
| EML4                 | 1.24719  | 0.854457 | 1.820433 | 0.252292 |
| CALM2                | 1.275875 | 0.803882 | 2.024996 | 0.301268 |
| CHAC2                | 1.248604 | 0.820386 | 1.900341 | 0.300162 |
| RPS27A               | 0.964072 | 0.62783  | 1.480393 | 0.86721  |
| VPS54                | 0.689959 | 0.415786 | 1.144924 | 0.150941 |
| ASXL2                | 0.926299 | 0.61343  | 1.398741 | 0.715794 |
| ETAA1                | 0.76719  | 0.494281 | 1.19078  | 0.237396 |
| SNRPG                | 1.554501 | 0.869266 | 2.779901 | 0.136873 |
| ABHD1                | 0.912614 | 0.599585 | 1.38907  | 0.669639 |
| MEIS1                | 1.159397 | 1.043476 | 1.288195 | 0.005927 |
| CIAO1                | 1.168787 | 0.625818 | 2.182845 | 0.624582 |
| ZNF514               | 0.711242 | 0.516541 | 0.979334 | 0.036804 |
| SNRNP20C             | 1.12059  | 0.760318 | 1.651575 | 0.565074 |
| MRPS5                | 1.729295 | 0.839111 | 3.563846 | 0.13767  |
| ANKRD53              | 1.021155 | 0.651818 | 1.599767 | 0.927178 |
| TPRKB                | 1.086371 | 0.64287  | 1.835832 | 0.756959 |
| EXOC6B               | 0.918243 | 0.695012 | 1.213175 | 0.548385 |

|          |          |          |          |          |
|----------|----------|----------|----------|----------|
| SFXN5    | 0.950169 | 0.630383 | 1.432178 | 0.807103 |
| TEX261   | 1.797139 | 1.004533 | 3.215136 | 0.048245 |
| DQX1     | 1.216573 | 0.668255 | 2.214796 | 0.521318 |
| DUSP11   | 1.348964 | 0.702406 | 2.590671 | 0.368636 |
| ST6GAL2  | 0.949899 | 0.720489 | 1.252354 | 0.715524 |
| THNSL2   | 0.962409 | 0.765615 | 1.209787 | 0.7427   |
| RALB     | 1.337493 | 0.933071 | 1.917204 | 0.113447 |
| TMEM177  | 1.34343  | 0.90441  | 1.995557 | 0.143657 |
| RABL2A   | 0.745769 | 0.490239 | 1.134489 | 0.170546 |
| SLC20A1  | 1.239258 | 0.719065 | 2.135774 | 0.439869 |
| FBLN7    | 0.795718 | 0.427716 | 1.480347 | 0.470628 |
| ZC3H8    | 0.905494 | 0.584592 | 1.402552 | 0.656557 |
| LIPT1    | 0.662577 | 0.428651 | 1.024162 | 0.063952 |
| FAHD2B   | 1.266388 | 0.933551 | 1.717891 | 0.129014 |
| LYG1     | 0.772476 | 0.514278 | 1.160303 | 0.213617 |
| AFF3     | 1.058451 | 0.898663 | 1.246651 | 0.496294 |
| UBXN4    | 0.899177 | 0.521622 | 1.550009 | 0.702075 |
| SPOPL    | 0.978887 | 0.672639 | 1.424569 | 0.911246 |
| POLR2D   | 0.983179 | 0.557482 | 1.733942 | 0.953268 |
| AMMECR1  | 0.727023 | 0.39169  | 1.349441 | 0.312372 |
| PKP4     | 0.889137 | 0.692358 | 1.141844 | 0.357225 |
| SCRN3    | 0.770024 | 0.500513 | 1.18466  | 0.234444 |
| CDCA7    | 0.900268 | 0.763172 | 1.061992 | 0.21261  |
| DLX1     | 0.810756 | 0.492167 | 1.335574 | 0.410079 |
| UBR3     | 0.873925 | 0.564258 | 1.353536 | 0.546014 |
| PHOSPHO  | 0.812462 | 0.589099 | 1.120514 | 0.205433 |
| FAM171B  | 1.087515 | 0.902771 | 1.310066 | 0.377139 |
| HSPD1    | 1.040783 | 0.744839 | 1.454315 | 0.814847 |
| CCDC150  | 0.948283 | 0.540089 | 1.664986 | 0.853315 |
| PTH2R    | 0.936708 | 0.815244 | 1.076268 | 0.356157 |
| NBEAL1   | 0.709561 | 0.488877 | 1.029865 | 0.071052 |
| SPAG16   | 1.264154 | 0.939744 | 1.700555 | 0.12133  |
| SUMF1    | 1.11344  | 0.65038  | 1.906192 | 0.695269 |
| RHBDD1   | 1.269634 | 0.768502 | 2.097547 | 0.351339 |
| HES6     | 0.829451 | 0.686791 | 1.001745 | 0.052154 |
| ANKMY1   | 1.20028  | 0.777275 | 1.853492 | 0.410254 |
| COPS7B   | 1.141722 | 0.614551 | 2.121108 | 0.674932 |
| DIS3L2   | 0.710955 | 0.408313 | 1.237916 | 0.227945 |
| CPNE9    | 1.031679 | 0.697667 | 1.525601 | 0.875835 |
| FANCD2   | 1.140245 | 0.79104  | 1.643606 | 0.48175  |
| VGLL4    | 0.837492 | 0.542655 | 1.292521 | 0.423129 |
| RAB5A    | 0.910616 | 0.472901 | 1.753476 | 0.779415 |
| CTDSP1   | 1.456921 | 0.929989 | 2.282414 | 0.10037  |
| STK11IP  | 1.453326 | 0.961956 | 2.195691 | 0.075777 |
| GMPPA    | 1.402995 | 0.842665 | 2.335918 | 0.192978 |
| EAF1     | 1.294611 | 0.875692 | 1.913934 | 0.195496 |
| CNTN4    | 1.498303 | 0.164846 | 13.61821 | 0.719548 |
| DYNC1LI1 | 1.07676  | 0.564581 | 2.053576 | 0.822359 |
| OSBPL10  | 0.876256 | 0.633486 | 1.212061 | 0.424835 |
| SLC25A38 | 0.739074 | 0.511898 | 1.067067 | 0.106626 |
| ITGA9    | 0.999944 | 0.886593 | 1.127787 | 0.999268 |
| GOLGA4   | 0.726998 | 0.488433 | 1.082085 | 0.116137 |
| CTDSPL   | 1.065051 | 0.900309 | 1.259936 | 0.462293 |
| STAC     | 0.932516 | 0.719543 | 1.208526 | 0.597376 |
| IQSEC1   | 1.205604 | 0.959029 | 1.515576 | 0.109239 |
| CAND2    | 1.172491 | 0.873331 | 1.574128 | 0.289694 |
| RPL32    | 1.080502 | 0.702202 | 1.662606 | 0.724744 |
| PTPRG    | 0.652599 | 0.474294 | 0.897934 | 0.008763 |

|          |          |          |          |          |
|----------|----------|----------|----------|----------|
| SHQ1     | 0.958664 | 0.587774 | 1.563586 | 0.865691 |
| SLC25A26 | 0.937036 | 0.513217 | 1.710848 | 0.832321 |
| UBA3     | 1.322737 | 0.752201 | 2.326018 | 0.331439 |
| ARL6IP5  | 1.984419 | 1.350192 | 2.916561 | 0.000486 |
| TMF1     | 0.686157 | 0.439836 | 1.070425 | 0.09691  |
| LRIG1    | 0.988117 | 0.761865 | 1.28156  | 0.928208 |
| LIMD1    | 1.014381 | 0.694706 | 1.481157 | 0.941068 |
| ZNF660   | 0.682086 | 0.520719 | 0.893459 | 0.005471 |
| NFKBIZ   | 0.9013   | 0.726141 | 1.11871  | 0.345922 |
| MYH15    | 4.051081 | 1.904863 | 8.615452 | 0.000279 |
| PHLDB2   | 0.813954 | 0.555266 | 1.193161 | 0.291463 |
| ABHD10   | 0.979991 | 0.667803 | 1.438123 | 0.917738 |
| PLA1A    | 1.052494 | 0.506655 | 2.186385 | 0.890904 |
| RABL3    | 0.804297 | 0.484415 | 1.335413 | 0.399858 |
| ADPRH    | 1.049873 | 0.837334 | 1.316362 | 0.67324  |
| ATG3     | 1.455616 | 1.063174 | 1.992919 | 0.019174 |
| NR1I2    | 0.984877 | 0.781685 | 1.240887 | 0.897156 |
| SRPRB    | 0.920948 | 0.57623  | 1.471887 | 0.730676 |
| AGTR1    | 0.979407 | 0.675482 | 1.420079 | 0.912589 |
| MED12L   | 1.094283 | 0.958936 | 1.248734 | 0.181055 |
| EIF2A    | 0.631246 | 0.391753 | 1.017149 | 0.058744 |
| OSBPL11  | 1.091285 | 0.835987 | 1.424549 | 0.520574 |
| TRPC1    | 0.962045 | 0.744286 | 1.243515 | 0.767604 |
| LPP      | 1.363674 | 0.911355 | 2.040485 | 0.131418 |
| TMEM44   | 0.899086 | 0.670589 | 1.205439 | 0.477053 |
| AMT      | 1.275379 | 0.693288 | 2.346199 | 0.43414  |
| TCTA     | 2.299874 | 1.461825 | 3.618368 | 0.000316 |
| UCN2     | 1.705796 | 0.514199 | 5.658778 | 0.382753 |
| STXBP5L  | 1.122538 | 0.796432 | 1.58217  | 0.509178 |
| EAF2     | 1.37439  | 0.979222 | 1.929029 | 0.065979 |
| ILDR1    | 1.306615 | 0.862754 | 1.978829 | 0.206637 |
| TM4SF19  | 1.060425 | 0.508592 | 2.211009 | 0.875642 |
| EIF2B5   | 1.264499 | 0.688775 | 2.321453 | 0.448985 |
| DGKQ     | 1.067739 | 0.790489 | 1.44223  | 0.669168 |
| FIP1L1   | 0.906601 | 0.452763 | 1.815355 | 0.781946 |
| SLC26A1  | 1.054129 | 0.754369 | 1.473003 | 0.757479 |
| LYAR     | 1.376017 | 0.923378 | 2.050538 | 0.116813 |
| ATP10D   | 0.778548 | 0.599253 | 1.011488 | 0.060871 |
| OCIAD2   | 1.185493 | 0.925815 | 1.518006 | 0.177364 |
| SLC10A4  | 1.038712 | 0.741046 | 1.455946 | 0.825515 |
| SCD5     | 1.143641 | 0.965165 | 1.35512  | 0.121046 |
| PLAC8    | 0.90279  | 0.652076 | 1.2499   | 0.537826 |
| ENOPH1   | 1.411297 | 0.832854 | 2.391488 | 0.200448 |
| KLHL8    | 0.881953 | 0.600232 | 1.295899 | 0.522309 |
| SNCA     | 0.945588 | 0.765915 | 1.167411 | 0.602821 |
| CAMK2D   | 1.201395 | 0.981154 | 1.471074 | 0.075762 |
| CISD2    | 1.029875 | 0.559603 | 1.895348 | 0.924641 |
| DDIT4L   | 0.796787 | 0.656294 | 0.967354 | 0.021715 |
| TIFA     | 1.27835  | 0.964708 | 1.693962 | 0.087302 |
| SPATA5   | 0.876887 | 0.568256 | 1.353141 | 0.552798 |
| CCNA2    | 0.955663 | 0.735032 | 1.24252  | 0.734898 |
| METTL14  | 0.660351 | 0.359596 | 1.212649 | 0.180828 |
| USP53    | 0.971259 | 0.75434  | 1.250555 | 0.821091 |
| SETD7    | 1.149341 | 0.942325 | 1.401834 | 0.169539 |
| NAF1     | 0.637008 | 0.371912 | 1.091063 | 0.100479 |
| SFRP2    | 1.015469 | 0.514131 | 2.005669 | 0.964742 |
| RPS3A    | 0.861163 | 0.610947 | 1.213855 | 0.393421 |
| RNF175   | 1.04176  | 0.857952 | 1.264948 | 0.679551 |

|          |          |          |          |          |
|----------|----------|----------|----------|----------|
| PDGFC    | 0.955303 | 0.785741 | 1.161456 | 0.646478 |
| CBR4     | 0.651493 | 0.415516 | 1.021485 | 0.061856 |
| CYP4V2   | 1.155632 | 0.924916 | 1.443901 | 0.203008 |
| ROPN1L   | 0.804435 | 0.645629 | 1.002302 | 0.052444 |
| NDUFS6   | 1.751876 | 1.071261 | 2.864914 | 0.025465 |
| NKD2     | 0.944473 | 0.785894 | 1.13505  | 0.54241  |
| SRD5A1   | 1.201382 | 0.900723 | 1.602399 | 0.211855 |
| MYO10    | 0.907649 | 0.546347 | 1.507883 | 0.7083   |
| RPL37    | 1.154464 | 0.743117 | 1.79351  | 0.522796 |
| SKP2     | 0.881412 | 0.574968 | 1.351181 | 0.562506 |
| OSMR     | 0.634026 | 0.437774 | 0.918255 | 0.015898 |
| PLK2     | 1.232082 | 1.01606  | 1.494031 | 0.033841 |
| GZMA     | 1.062027 | 0.879979 | 1.281737 | 0.530481 |
| PIK3R1   | 0.782865 | 0.534381 | 1.146895 | 0.208943 |
| LHFPL2   | 0.818808 | 0.674904 | 0.993395 | 0.042646 |
| SSBP2    | 0.750772 | 0.605731 | 0.930543 | 0.008865 |
| IQGAP2   | 0.867625 | 0.663364 | 1.134781 | 0.299841 |
| CRHBP    | 1.135228 | 0.987128 | 1.305546 | 0.075351 |
| RASA1    | 0.708738 | 0.473505 | 1.060833 | 0.09433  |
| LIX1     | 0.847396 | 0.485822 | 1.478075 | 0.559645 |
| GIN1     | 0.825006 | 0.540108 | 1.260182 | 0.373458 |
| PAM      | 0.882501 | 0.720821 | 1.080446 | 0.226051 |
| BDP1     | 0.642801 | 0.436451 | 0.946712 | 0.025274 |
| GTF2H2   | 1.158275 | 0.766111 | 1.751184 | 0.486001 |
| SLC30A5  | 0.678558 | 0.396376 | 1.161627 | 0.157434 |
| BTF3     | 0.756692 | 0.494307 | 1.158356 | 0.199382 |
| FBXL17   | 0.92156  | 0.546815 | 1.553126 | 0.759043 |
| SPATA9   | 0.52189  | 0.372151 | 0.731878 | 0.000164 |
| TNFAIP8  | 0.728781 | 0.535034 | 0.992687 | 0.044801 |
| FEM1C    | 0.598972 | 0.401349 | 0.893902 | 0.012107 |
| COMMD10  | 0.68467  | 0.424167 | 1.105161 | 0.120983 |
| ATG12    | 0.580672 | 0.362076 | 0.931242 | 0.024098 |
| MEGF10   | 0.889274 | 0.713018 | 1.109101 | 0.297783 |
| YIPF5    | 1.039014 | 0.632654 | 1.706383 | 0.879817 |
| ARHGAP20 | 1.072641 | 0.842945 | 1.364928 | 0.568444 |
| DDX46    | 0.817887 | 0.501936 | 1.332717 | 0.419672 |
| TIMD4    | 1.119761 | 0.948025 | 1.322608 | 0.182983 |
| RNF145   | 1.613746 | 1.15969  | 2.245579 | 0.004528 |
| FBXO38   | 0.893027 | 0.632752 | 1.260362 | 0.51983  |
| PCYOX1L  | 1.326911 | 0.940652 | 1.871778 | 0.10709  |
| TNIP1    | 1.53528  | 0.986239 | 2.389974 | 0.057618 |
| G3BP1    | 0.568413 | 0.344554 | 0.937714 | 0.026983 |
| ZNF300   | 1.062069 | 0.867824 | 1.299792 | 0.558996 |
| N4BP3    | 1.236692 | 0.867291 | 1.763431 | 0.240603 |
| NHP2     | 1.83849  | 1.125254 | 3.003807 | 0.015053 |
| RMND5B   | 1.712298 | 1.231504 | 2.380799 | 0.001383 |
| KCNMB1   | 1.489813 | 1.22581  | 1.810674 | 6.18E-05 |
| FAM50B   | 1.123272 | 0.9122   | 1.383182 | 0.273679 |
| MYLK4    | 0.942883 | 0.733073 | 1.212742 | 0.646971 |
| TBC1D7   | 1.121189 | 0.61077  | 2.058164 | 0.712054 |
| FARS2    | 0.895535 | 0.488387 | 1.642107 | 0.721343 |
| GFOD1    | 1.298089 | 1.025992 | 1.642348 | 0.029723 |
| CDKAL1   | 0.690753 | 0.41982  | 1.136535 | 0.145333 |
| PSD2     | 1.186623 | 0.802926 | 1.753679 | 0.390563 |
| LRRTM2   | 0.737892 | 0.496941 | 1.095673 | 0.131817 |
| ZMAT2    | 0.827442 | 0.498713 | 1.372853 | 0.463406 |
| GFRA3    | 0.43268  | 0.262872 | 0.712181 | 0.000984 |
| KLHL3    | 1.282178 | 0.983585 | 1.671418 | 0.066122 |

|          |          |          |          |          |
|----------|----------|----------|----------|----------|
| TRIM7    | 1.067859 | 0.807327 | 1.412465 | 0.645443 |
| TRIM41   | 2.162736 | 1.096419 | 4.266096 | 0.026045 |
| HIGD2A   | 1.80772  | 1.240487 | 2.63433  | 0.002059 |
| FAM193B  | 0.791523 | 0.551141 | 1.13675  | 0.205534 |
| PLA2G7   | 1.012204 | 0.821482 | 1.247206 | 0.909334 |
| TNFRSF21 | 1.057958 | 0.897044 | 1.247738 | 0.503313 |
| RNF44    | 0.834432 | 0.540033 | 1.289323 | 0.414892 |
| DOK3     | 1.178984 | 0.885282 | 1.570124 | 0.259999 |
| ABT1     | 1.370135 | 0.726364 | 2.584474 | 0.330763 |
| DAAM2    | 1.158591 | 0.927491 | 1.447275 | 0.194689 |
| PRIM2    | 1.120901 | 0.636654 | 1.973473 | 0.692504 |
| FGD2     | 1.204624 | 1.063039 | 1.365066 | 0.00352  |
| SCUBE3   | 0.799955 | 0.575841 | 1.111291 | 0.183255 |
| ANO7     | 0.975374 | 0.863282 | 1.102021 | 0.688926 |
| CRIP3    | 1.617388 | 1.23729  | 2.114253 | 0.000435 |
| TCTE1    | 1.322165 | 0.827929 | 2.111437 | 0.242272 |
| RPL7L1   | 1.049449 | 0.622251 | 1.769934 | 0.856377 |
| NFKBIE   | 1.396381 | 0.949801 | 2.052934 | 0.089501 |
| TPBG     | 0.877809 | 0.751837 | 1.024887 | 0.09916  |
| IRAK1BP1 | 0.635915 | 0.463784 | 0.871931 | 0.00494  |
| PHIP     | 0.603199 | 0.390883 | 0.930839 | 0.022387 |
| PNRC1    | 0.837749 | 0.50468  | 1.390633 | 0.493555 |
| PM20D2   | 0.971657 | 0.7618   | 1.239324 | 0.816845 |
| RARS2    | 0.780494 | 0.361498 | 1.685129 | 0.527978 |
| SCML4    | 0.975754 | 0.774094 | 1.229948 | 0.835391 |
| RNF217   | 1.145471 | 0.991966 | 1.322731 | 0.064301 |
| ARHGAP18 | 1.343382 | 0.960083 | 1.879708 | 0.085017 |
| SHPRH    | 0.595393 | 0.415476 | 0.85322  | 0.004733 |
| AIG1     | 0.911956 | 0.76976  | 1.080419 | 0.286593 |
| DYNLT1   | 1.06413  | 0.759178 | 1.491577 | 0.718264 |
| TIAM2    | 1.020519 | 0.62063  | 1.678066 | 0.936202 |
| TMEM181  | 0.707936 | 0.500219 | 1.001908 | 0.051271 |
| PNLDC1   | 0.893882 | 0.558937 | 1.429546 | 0.639591 |
| WTAP     | 0.9413   | 0.479852 | 1.846499 | 0.860319 |
| ZMYM4    | 0.690175 | 0.407142 | 1.169964 | 0.168502 |
| VWDE     | 1.130099 | 0.961986 | 1.327591 | 0.136659 |
| GNA12    | 1.227884 | 0.92511  | 1.629749 | 0.155285 |
| SDK1     | 0.785502 | 0.457888 | 1.347519 | 0.380603 |
| WASH2P   | 1.307563 | 0.885659 | 1.930449 | 0.177305 |
| RBAK     | 0.690116 | 0.446155 | 1.067476 | 0.095602 |
| CREB5    | 1.163734 | 0.997316 | 1.357922 | 0.054126 |
| CDCA5    | 1.127822 | 0.805715 | 1.578698 | 0.483294 |
| IGFBP3   | 0.929493 | 0.738459 | 1.169946 | 0.533372 |
| PURB     | 0.757108 | 0.462987 | 1.238074 | 0.267478 |
| MDH2     | 1.604805 | 0.998264 | 2.579877 | 0.050844 |
| POMZP3   | 0.653618 | 0.427729 | 0.998801 | 0.049355 |
| CCT6A    | 0.8723   | 0.604031 | 1.259714 | 0.466232 |
| PSPH     | 0.979756 | 0.666205 | 1.440881 | 0.917229 |
| ZNF92    | 0.667516 | 0.47264  | 0.94274  | 0.021749 |
| ATXN7L1  | 0.654501 | 0.409756 | 1.045429 | 0.076058 |
| TMEM168  | 0.682407 | 0.459199 | 1.014111 | 0.058673 |
| ASB15    | 1.180002 | 0.391989 | 3.552153 | 0.768476 |
| SLC12A9  | 1.127035 | 0.8794   | 1.444403 | 0.344797 |
| GIGYF1   | 0.724118 | 0.486194 | 1.078472 | 0.112227 |
| TRIM4    | 0.751716 | 0.472691 | 1.195446 | 0.227914 |
| MEPCE    | 1.122564 | 0.686229 | 1.836342 | 0.645212 |
| TMEM209  | 0.948404 | 0.615922 | 1.460365 | 0.809919 |
| AGBL3    | 0.847946 | 0.506977 | 1.418235 | 0.529673 |



|          |          |          |          |          |
|----------|----------|----------|----------|----------|
| ZC3HAV1  | 0.695713 | 0.546123 | 0.886277 | 0.00331  |
| TMEM140  | 1.233489 | 0.840644 | 1.809915 | 0.283426 |
| TLK2     | 0.615166 | 0.342656 | 1.104397 | 0.103659 |
| EPHA1    | 1.119137 | 0.798605 | 1.568319 | 0.513267 |
| NOM1     | 0.704209 | 0.440272 | 1.126371 | 0.143365 |
| NCAPG2   | 1.024621 | 0.743548 | 1.411943 | 0.881811 |
| RAB19    | 0.895884 | 0.600319 | 1.336969 | 0.590406 |
| LUC7L2   | 0.468779 | 0.297706 | 0.738154 | 0.001073 |
| SH3KBP1  | 1.053114 | 0.695056 | 1.595626 | 0.807145 |
| LANCL3   | 1.01041  | 0.764793 | 1.33491  | 0.9419   |
| CASK     | 0.717564 | 0.504315 | 1.020987 | 0.065106 |
| SPIN2A   | 0.542518 | 0.367091 | 0.80178  | 0.002152 |
| MSN      | 1.819767 | 1.127191 | 2.937879 | 0.01429  |
| HDAC8    | 0.597769 | 0.375684 | 0.95114  | 0.029904 |
| SLC16A2  | 0.762725 | 0.604684 | 0.962072 | 0.022234 |
| ZNF182   | 0.817966 | 0.487962 | 1.371146 | 0.445841 |
| CHST7    | 1.54708  | 1.170695 | 2.044474 | 0.002155 |
| NDUFB11  | 1.30586  | 0.856539 | 1.990883 | 0.214879 |
| ZNF41    | 0.870335 | 0.519584 | 1.457865 | 0.597735 |
| RAB41    | 1.211386 | 0.641941 | 2.285965 | 0.553937 |
| ZMYM3    | 0.938109 | 0.652233 | 1.349284 | 0.730454 |
| TAF1     | 0.812654 | 0.515803 | 1.280348 | 0.371089 |
| GPR174   | 0.85203  | 0.716504 | 1.013191 | 0.070032 |
| NONO     | 0.960924 | 0.5745   | 1.607268 | 0.879286 |
| CCDC120  | 1.024149 | 0.721094 | 1.454569 | 0.893955 |
| LPAR4    | 0.839362 | 0.713638 | 0.987234 | 0.034417 |
| EBP      | 2.17715  | 1.401855 | 3.381222 | 0.000532 |
| OGT      | 0.823252 | 0.601581 | 1.126606 | 0.224304 |
| SNX12    | 1.51613  | 0.773312 | 2.972475 | 0.225682 |
| ITGB1BP2 | 0.678803 | 0.40529  | 1.136897 | 0.140923 |
| IL2RG    | 1.055957 | 0.859301 | 1.297618 | 0.604583 |
| ZNF711   | 0.877283 | 0.790131 | 0.974049 | 0.014187 |
| DIAPH2   | 0.856944 | 0.652494 | 1.125456 | 0.26695  |
| NXF3     | 0.993674 | 0.881623 | 1.119966 | 0.917202 |
| PRPS1    | 1.682212 | 0.976433 | 2.898139 | 0.060926 |
| DOCK11   | 1.11125  | 0.78816  | 1.566784 | 0.547298 |
| IGSF1    | 1.166789 | 0.819096 | 1.662072 | 0.392821 |
| GPC3     | 1.567566 | 1.180624 | 2.081326 | 0.001884 |
| RBMX     | 0.819939 | 0.495781 | 1.356044 | 0.439277 |
| MCPH1    | 0.886347 | 0.550002 | 1.428377 | 0.62022  |
| MFHAS1   | 1.334596 | 0.953805 | 1.86741  | 0.092179 |
| FBXO25   | 0.688655 | 0.463055 | 1.024166 | 0.065468 |
| NSDHL    | 1.267481 | 0.748602 | 2.146011 | 0.377643 |
| ZNF185   | 1.086123 | 0.94698  | 1.24571  | 0.237556 |
| CETN2    | 0.943133 | 0.615831 | 1.444391 | 0.787761 |
| RPL10    | 1.207205 | 0.818121 | 1.781329 | 0.342797 |
| CSGALNA  | 1.011484 | 0.86137  | 1.187758 | 0.88921  |
| ATP6V1B2 | 1.080284 | 0.782872 | 1.490684 | 0.638329 |
| CCDC25   | 1.37318  | 0.845802 | 2.22939  | 0.199621 |
| HMBOX1   | 0.903018 | 0.581723 | 1.401769 | 0.649345 |
| CHRNA6   | 0.714824 | 0.556402 | 0.918352 | 0.008633 |
| GNRH1    | 0.827172 | 0.503473 | 1.358989 | 0.45383  |
| BIN3     | 1.072667 | 0.710397 | 1.619678 | 0.738649 |
| DOK2     | 1.399042 | 1.175794 | 1.664677 | 0.000153 |
| SLC25A37 | 0.920105 | 0.729481 | 1.160542 | 0.482065 |
| CHMP7    | 1.669898 | 0.936722 | 2.976934 | 0.082148 |
| DOCK5    | 0.754231 | 0.625635 | 0.909259 | 0.003103 |
| STAR     | 0.740874 | 0.592203 | 0.926869 | 0.008677 |

|          |          |          |          |          |
|----------|----------|----------|----------|----------|
| ERLIN2   | 1.037714 | 0.675051 | 1.595213 | 0.865998 |
| ST18     | 0.889141 | 0.766033 | 1.032032 | 0.122274 |
| RGS20    | 0.753195 | 0.427513 | 1.326984 | 0.326649 |
| TACC1    | 1.230903 | 0.789382 | 1.919378 | 0.359381 |
| GOLGA7   | 0.908068 | 0.528524 | 1.560169 | 0.72692  |
| GINS4    | 1.460815 | 0.9336   | 2.285753 | 0.09708  |
| DNAJC5B  | 1.400737 | 1.033455 | 1.898547 | 0.029851 |
| ADHFE1   | 1.455888 | 1.021139 | 2.075731 | 0.037935 |
| MRPS28   | 1.118867 | 0.658412 | 1.901338 | 0.678023 |
| LACTB2   | 1.195549 | 0.850317 | 1.680946 | 0.30427  |
| TERF1    | 0.769465 | 0.42838  | 1.382129 | 0.380504 |
| RPL7     | 0.951882 | 0.690767 | 1.3117   | 0.763076 |
| ATP6V0D2 | 0.910569 | 0.417806 | 1.984498 | 0.813667 |
| MTDH     | 1.049636 | 0.660327 | 1.66847  | 0.837678 |
| LRP12    | 0.841755 | 0.668059 | 1.060612 | 0.144039 |
| EBAG9    | 0.906778 | 0.541991 | 1.517087 | 0.709391 |
| POLR2K   | 1.50673  | 0.873081 | 2.600258 | 0.140898 |
| EIF3H    | 1.002861 | 0.655777 | 1.533648 | 0.989483 |
| UTP23    | 1.072672 | 0.724074 | 1.589098 | 0.726451 |
| NDUFB9   | 1.587381 | 1.076088 | 2.341612 | 0.019823 |
| TATDN1   | 0.802529 | 0.478107 | 1.34709  | 0.40514  |
| FAM83A   | 1.158147 | 0.921187 | 1.456061 | 0.208723 |
| GSDMC    | 0.930484 | 0.781308 | 1.108144 | 0.418997 |
| ZNF7     | 0.66072  | 0.378422 | 1.15361  | 0.144997 |
| SLC39A4  | 1.333123 | 0.960805 | 1.849716 | 0.085309 |
| VLDLR    | 1.065929 | 0.894353 | 1.27042  | 0.475832 |
| AK3      | 1.252741 | 0.824196 | 1.904109 | 0.291492 |
| UHRF2    | 0.530494 | 0.311251 | 0.904171 | 0.019793 |
| NFIB     | 0.951187 | 0.630317 | 1.435401 | 0.811597 |
| PLIN2    | 0.929301 | 0.755658 | 1.142845 | 0.487198 |
| HAUS6    | 0.757658 | 0.450399 | 1.274528 | 0.29564  |
| CDKN2B   | 1.086881 | 0.87832  | 1.344965 | 0.443433 |
| CDKN2A   | 0.97285  | 0.797598 | 1.186611 | 0.785926 |
| IFNK     | 1.034543 | 0.833009 | 1.284835 | 0.758696 |
| ZCCHC7   | 1.031329 | 0.694502 | 1.531514 | 0.878468 |
| FBXO10   | 0.719897 | 0.508418 | 1.01934  | 0.064023 |
| SIGMAR1  | 1.930592 | 1.403021 | 2.656542 | 5.36E-05 |
| CBWD5    | 0.514844 | 0.275842 | 0.960929 | 0.037057 |
| CEP78    | 0.963857 | 0.638548 | 1.454895 | 0.860897 |
| AUH      | 0.516682 | 0.327828 | 0.81433  | 0.004444 |
| ZNF462   | 1.106129 | 0.883464 | 1.384915 | 0.379109 |
| UGCG     | 0.949313 | 0.752627 | 1.197398 | 0.660569 |
| SNX30    | 0.854619 | 0.632686 | 1.1544   | 0.305815 |
| STOM     | 1.156507 | 0.896991 | 1.491107 | 0.262077 |
| GSN      | 1.334147 | 1.065728 | 1.670171 | 0.01189  |
| MRRF     | 0.821446 | 0.491706 | 1.37231  | 0.452533 |
| NR6A1    | 1.172775 | 0.992786 | 1.385397 | 0.060822 |
| CRB2     | 0.952886 | 0.674717 | 1.345736 | 0.784077 |
| ALAD     | 1.297803 | 0.90499  | 1.861117 | 0.156422 |
| WDR31    | 0.760921 | 0.551408 | 1.05004  | 0.096352 |
| POLE3    | 1.25382  | 0.729958 | 2.153636 | 0.412486 |
| SURF4    | 1.059716 | 0.72904  | 1.54038  | 0.761178 |
| GBGT1    | 1.026581 | 0.737343 | 1.429278 | 0.876531 |
| SURF1    | 1.706141 | 0.990972 | 2.937434 | 0.053949 |
| SURF2    | 0.964842 | 0.639881 | 1.454834 | 0.864373 |
| SURF6    | 1.358481 | 0.748348 | 2.466061 | 0.313902 |
| MED22    | 1.279417 | 0.820222 | 1.99569  | 0.277355 |
| REXO4    | 1.50796  | 0.875202 | 2.59819  | 0.13894  |

|          |          |          |          |          |
|----------|----------|----------|----------|----------|
| RPL7A    | 1.141049 | 0.783982 | 1.660743 | 0.490791 |
| GTF3C5   | 1.190309 | 0.896833 | 1.579821 | 0.227772 |
| ASB6     | 1.139437 | 0.707243 | 1.835743 | 0.591646 |
| PTGES2   | 1.364429 | 0.889438 | 2.09308  | 0.15465  |
| CIZ1     | 1.299416 | 0.846396 | 1.99491  | 0.231116 |
| SLC25A25 | 1.389198 | 0.940176 | 2.052669 | 0.098886 |
| SH3GLB2  | 1.350864 | 0.966129 | 1.888808 | 0.078665 |
| PTGES    | 1.109711 | 0.781595 | 1.575571 | 0.560508 |
| LCN2     | 1.007076 | 0.877846 | 1.155329 | 0.919849 |
| LRSAM1   | 1.678387 | 0.942256 | 2.989615 | 0.078741 |
| GPR107   | 1.002227 | 0.600133 | 1.673729 | 0.993215 |
| IDI2     | 0.92938  | 0.560108 | 1.542107 | 0.77682  |
| INPP5E   | 0.894515 | 0.60617  | 1.320022 | 0.574471 |
| SEC16A   | 1.072717 | 0.639715 | 1.798805 | 0.790125 |
| NOTCH1   | 1.074794 | 0.828698 | 1.393973 | 0.586666 |
| NACC2    | 1.116195 | 0.940191 | 1.325148 | 0.209278 |
| USP6NL   | 1.171608 | 0.786194 | 1.745962 | 0.436499 |
| COMMD3   | 1.410856 | 1.067808 | 1.864114 | 0.015455 |
| MSRB2    | 1.435929 | 0.901758 | 2.286525 | 0.127432 |
| PDSS1    | 1.215731 | 0.770213 | 1.918953 | 0.401564 |
| FAM171A1 | 0.925642 | 0.81728  | 1.048373 | 0.223858 |
| RSU1     | 1.769384 | 1.112921 | 2.813066 | 0.015855 |
| ST8SIA6  | 1.093256 | 0.973412 | 1.227855 | 0.132304 |
| PARD3    | 0.859489 | 0.691897 | 1.067674 | 0.171235 |
| ZEB1     | 0.940176 | 0.782627 | 1.12944  | 0.509755 |
| NRBF2    | 1.374738 | 0.868939 | 2.174956 | 0.173905 |
| POLR3A   | 1.005756 | 0.614804 | 1.645313 | 0.981766 |
| HERC4    | 0.819138 | 0.464222 | 1.445401 | 0.491109 |
| CAMK2G   | 0.845727 | 0.605879 | 1.180523 | 0.324778 |
| GLUD1    | 1.616563 | 1.045238 | 2.500176 | 0.030863 |
| ANKRD1   | 1.771582 | 0.654796 | 4.793099 | 0.260107 |
| HTR7     | 1.360345 | 1.175953 | 1.57365  | 3.4E-05  |
| RPP30    | 2.241007 | 1.06209  | 4.728521 | 0.034168 |
| ADD3     | 1.270358 | 0.975509 | 1.654325 | 0.075742 |
| DNAJB12  | 2.015073 | 1.20107  | 3.380752 | 0.007956 |
| EIF4EBP2 | 1.189177 | 0.697291 | 2.028052 | 0.524678 |
| TCF7L2   | 1.018107 | 0.822283 | 1.260566 | 0.869219 |
| MKI67    | 0.97197  | 0.780899 | 1.209793 | 0.799048 |
| LRRC27   | 1.696971 | 1.068297 | 2.695607 | 0.025106 |
| MTG1     | 0.94752  | 0.525926 | 1.707071 | 0.857562 |
| NKX6-2   | 0.588732 | 0.281139 | 1.232865 | 0.160067 |
| PAOX     | 1.624917 | 0.993471 | 2.657707 | 0.053129 |
| GSTO1    | 1.636349 | 1.068525 | 2.505919 | 0.023527 |
| TAF5     | 1.09621  | 0.600727 | 2.000369 | 0.764687 |
| PPRC1    | 0.976811 | 0.672712 | 1.418379 | 0.901878 |
| ITPRIP   | 1.195612 | 0.892922 | 1.600911 | 0.230318 |
| CNNM2    | 0.659625 | 0.378143 | 1.150637 | 0.142733 |
| PDCD11   | 0.999896 | 0.669143 | 1.494138 | 0.999595 |
| RGS10    | 1.345538 | 1.101352 | 1.643862 | 0.003675 |
| BTBD10   | 1.318506 | 0.738791 | 2.353112 | 0.349486 |
| ADM      | 1.139497 | 0.943738 | 1.375862 | 0.17451  |
| GAS2     | 1.193588 | 0.843345 | 1.689289 | 0.318007 |
| LIN7C    | 0.793218 | 0.491418 | 1.280367 | 0.342988 |
| IMMP1L   | 0.541274 | 0.344789 | 0.849729 | 0.007639 |
| TUT1     | 0.909928 | 0.533646 | 1.551532 | 0.72883  |
| SCGB1A1  | 1.291972 | 0.987709 | 1.689962 | 0.061525 |
| HSD17B12 | 1.009265 | 0.651972 | 1.562361 | 0.967006 |
| APIP     | 1.068935 | 0.633799 | 1.802814 | 0.802609 |

|          |          |          |          |          |
|----------|----------|----------|----------|----------|
| DGKZ     | 0.919314 | 0.677107 | 1.24816  | 0.589748 |
| EIF3M    | 0.880276 | 0.558649 | 1.38707  | 0.582558 |
| TNKS1BP1 | 0.89852  | 0.669493 | 1.205896 | 0.475967 |
| SERPING1 | 0.887328 | 0.7784   | 1.0115   | 0.073638 |
| SSRP1    | 1.573242 | 0.953153 | 2.596738 | 0.076344 |
| SLC43A1  | 0.825264 | 0.603479 | 1.128558 | 0.229119 |
| PTPRJ    | 1.026037 | 0.883112 | 1.192094 | 0.736988 |
| ARFGAP2  | 1.416637 | 0.822602 | 2.439648 | 0.209179 |
| CCDC81   | 0.918475 | 0.520299 | 1.621366 | 0.769304 |
| SESN3    | 0.897254 | 0.756972 | 1.063533 | 0.211349 |
| ENDOD1   | 1.117619 | 0.933776 | 1.337658 | 0.225237 |
| CCDC82   | 0.649581 | 0.415883 | 1.014602 | 0.057927 |
| KLHL35   | 0.807753 | 0.509866 | 1.27968  | 0.363109 |
| SERPINH1 | 0.964701 | 0.806781 | 1.153532 | 0.693571 |
| CAPN5    | 1.233848 | 0.926012 | 1.644017 | 0.151278 |
| INTS4    | 0.676699 | 0.393148 | 1.164755 | 0.158683 |
| PAK1     | 1.379157 | 1.087689 | 1.74873  | 0.007958 |
| RPS3     | 1.250223 | 0.823278 | 1.898578 | 0.294787 |
| ZC3H12C  | 1.013508 | 0.851531 | 1.206297 | 0.879957 |
| TTC12    | 0.947954 | 0.751159 | 1.196307 | 0.652557 |
| NCAM1    | 1.082577 | 0.922254 | 1.270771 | 0.331919 |
| NPAT     | 0.919839 | 0.625641 | 1.35238  | 0.670906 |
| ATM      | 0.935757 | 0.654428 | 1.338023 | 0.715905 |
| AASDHPP  | 0.973112 | 0.626293 | 1.511987 | 0.903514 |
| GLB1L2   | 1.287679 | 1.011024 | 1.640038 | 0.040482 |
| P4HA3    | 0.730538 | 0.30294  | 1.761691 | 0.484492 |
| ST14     | 1.210598 | 1.060678 | 1.381709 | 0.004607 |
| HYOU1    | 0.880016 | 0.652531 | 1.186807 | 0.402252 |
| MTA2     | 2.310025 | 1.307433 | 4.081446 | 0.003939 |
| TMEM138  | 0.926117 | 0.519074 | 1.652353 | 0.794987 |
| FADS1    | 1.474898 | 1.092337 | 1.99144  | 0.011198 |
| ROM1     | 1.820116 | 0.944192 | 3.508633 | 0.073699 |
| EML3     | 1.537892 | 1.009585 | 2.342657 | 0.045029 |
| INCENP   | 1.044532 | 0.719736 | 1.515899 | 0.818652 |
| ZP1      | 1.395018 | 0.638031 | 3.050128 | 0.404232 |
| MS4A3    | 0.898189 | 0.822741 | 0.980557 | 0.016459 |
| PLCH2    | 1.230471 | 0.880776 | 1.719005 | 0.224072 |
| MS4A2    | 0.903798 | 0.78183  | 1.044793 | 0.171457 |
| B3GAT3   | 1.444507 | 0.966065 | 2.159897 | 0.073171 |
| EI24     | 2.227536 | 1.380495 | 3.594304 | 0.001035 |
| CCDC15   | 0.914244 | 0.660119 | 1.266199 | 0.589493 |
| CHEK1    | 1.037536 | 0.753683 | 1.428293 | 0.821238 |
| FEZ1     | 1.43028  | 1.004314 | 2.036914 | 0.047275 |
| ESAM     | 1.011171 | 0.868208 | 1.177676 | 0.886413 |
| KIRREL3  | 0.827578 | 0.668074 | 1.025164 | 0.083192 |
| MPZL2    | 1.352948 | 1.111058 | 1.6475   | 0.002631 |
| SIDT2    | 1.275119 | 0.9838   | 1.652701 | 0.066277 |
| TMEM25   | 1.007924 | 0.797262 | 1.274249 | 0.947396 |
| TAGLN    | 1.183544 | 0.893767 | 1.567273 | 0.23955  |
| DUSP15   | 0.813044 | 0.557458 | 1.185812 | 0.282433 |
| COMMD7   | 2.759814 | 1.559647 | 4.883523 | 0.00049  |
| DSN1     | 1.350761 | 0.861579 | 2.117689 | 0.190009 |
| LSM14B   | 0.969992 | 0.640092 | 1.469921 | 0.88577  |
| YTHDF1   | 0.94831  | 0.555183 | 1.619812 | 0.845946 |
| CABLES2  | 1.599785 | 1.064504 | 2.404231 | 0.023777 |
| GPHA2    | 1.24028  | 0.616831 | 2.493866 | 0.545691 |
| TRPT1    | 0.966636 | 0.658155 | 1.419703 | 0.86263  |
| NUDT22   | 1.610438 | 1.034624 | 2.506719 | 0.034795 |

|          |          |          |          |          |
|----------|----------|----------|----------|----------|
| FERMT3   | 1.953302 | 1.402477 | 2.720464 | 7.46E-05 |
| PLCB3    | 1.325977 | 0.953027 | 1.844873 | 0.094044 |
| MRPL49   | 3.016751 | 1.65899  | 5.485737 | 0.000296 |
| FAU      | 1.388726 | 0.959121 | 2.010757 | 0.082045 |
| TM7SF2   | 0.988014 | 0.661584 | 1.475508 | 0.95301  |
| TBX6     | 1.210472 | 0.812392 | 1.803614 | 0.347838 |
| PPP4C    | 1.631748 | 1.023896 | 2.600462 | 0.039468 |
| ALDOA    | 1.161882 | 0.752547 | 1.793867 | 0.498359 |
| DOC2A    | 0.712222 | 0.566528 | 0.895385 | 0.003657 |
| HIRIP3   | 2.201253 | 1.346795 | 3.597813 | 0.001646 |
| TAOK2    | 1.411784 | 0.852856 | 2.337012 | 0.179912 |
| TMEM219  | 1.636176 | 0.921002 | 2.906697 | 0.093096 |
| HMGA2    | 1.163833 | 0.961186 | 1.409205 | 0.120093 |
| CNKSR2   | 1.19386  | 0.820025 | 1.73812  | 0.355175 |
| KLRF1    | 1.156926 | 0.97122  | 1.37814  | 0.102501 |
| MKX      | 1.403115 | 0.545392 | 3.609755 | 0.482364 |
| MPP7     | 1.288118 | 1.074739 | 1.543862 | 0.006144 |
| ITGB1    | 0.795927 | 0.576899 | 1.098112 | 0.164529 |
| CTF1     | 0.953746 | 0.697793 | 1.303583 | 0.766429 |
| CWC15    | 1.192802 | 0.621554 | 2.289061 | 0.596029 |
| FCGR1A   | 1.110852 | 0.942194 | 1.309701 | 0.210842 |
| ARID5B   | 1.311585 | 1.045493 | 1.645402 | 0.019052 |
| DCUN1D2  | 0.61246  | 0.400326 | 0.937005 | 0.023828 |
| TMCO3    | 0.781813 | 0.517141 | 1.181943 | 0.243108 |
| TMEM218  | 0.847817 | 0.467726 | 1.536784 | 0.586431 |
| TIRAP    | 1.140302 | 0.728324 | 1.785316 | 0.565962 |
| LATS2    | 1.041811 | 0.717637 | 1.512423 | 0.829474 |
| SAP18    | 1.064103 | 0.573333 | 1.974968 | 0.843894 |
| KIAA1328 | 0.81792  | 0.522865 | 1.279474 | 0.378632 |
| FAM124A  | 1.125649 | 0.93611  | 1.353564 | 0.208337 |
| MIA2     | 0.633457 | 0.321161 | 1.249427 | 0.187701 |
| HNMT     | 1.194283 | 1.053687 | 1.35364  | 0.005465 |
| PDCD4    | 0.591126 | 0.365125 | 0.957013 | 0.032459 |
| ADRA2A   | 0.955863 | 0.818348 | 1.116485 | 0.568947 |
| WDR17    | 1.101967 | 0.856821 | 1.417252 | 0.44946  |
| CCDC102E | 1.168962 | 0.744818 | 1.834638 | 0.497229 |
| CD226    | 1.161771 | 0.897478 | 1.503894 | 0.254868 |
| FSIP1    | 1.46639  | 0.650323 | 3.306508 | 0.356136 |
| RGS18    | 0.837402 | 0.65177  | 1.075904 | 0.165201 |
| PRSS23   | 1.15566  | 0.763278 | 1.749758 | 0.494242 |
| MTMR12   | 1.579604 | 1.051245 | 2.373516 | 0.027771 |
| CCT5     | 1.23801  | 0.831181 | 1.843966 | 0.293568 |
| DOCK1    | 1.247436 | 1.116021 | 1.394325 | 9.92E-05 |
| DIXDC1   | 0.746606 | 0.556859 | 1.001009 | 0.050793 |
| DLAT     | 1.030608 | 0.630883 | 1.683598 | 0.904166 |
| TIMM8B   | 1.671717 | 1.030361 | 2.71229  | 0.037425 |
| IL18     | 1.085519 | 0.821277 | 1.43478  | 0.564242 |
| TEX12    | 0.633684 | 0.342867 | 1.171169 | 0.145456 |
| PTS      | 0.721741 | 0.438748 | 1.187266 | 0.199127 |
| PIP4K2A  | 1.580252 | 0.966635 | 2.583392 | 0.068054 |
| FOXO1    | 1.056301 | 0.882803 | 1.263897 | 0.549627 |
| CRIM1    | 0.829701 | 0.645097 | 1.067132 | 0.145963 |
| SEC24D   | 0.80975  | 0.569451 | 1.151451 | 0.240053 |
| ABCB9    | 1.22996  | 0.775503 | 1.950736 | 0.379096 |
| RILPL2   | 1.292521 | 0.81966  | 2.038175 | 0.269509 |
| DHX37    | 1.485909 | 0.968824 | 2.278975 | 0.069551 |
| UBC      | 1.541719 | 1.089357 | 2.181927 | 0.014567 |
| ITPR1    | 1.2429   | 0.901598 | 1.713402 | 0.184326 |

|          |          |          |          |          |
|----------|----------|----------|----------|----------|
| SLC7A11  | 1.402399 | 1.062526 | 1.850987 | 0.016928 |
| CACNA2D  | 1.028238 | 0.874146 | 1.209492 | 0.736747 |
| DCP1B    | 1.028967 | 0.612288 | 1.729207 | 0.914143 |
| CACNA1C  | 0.653341 | 0.481873 | 0.885825 | 0.006134 |
| KCNA6    | 0.948557 | 0.794628 | 1.132305 | 0.558826 |
| THRB     | 0.949469 | 0.711178 | 1.267603 | 0.725077 |
| NGLY1    | 0.61535  | 0.38894  | 0.973558 | 0.038037 |
| OXSM     | 1.09177  | 0.692456 | 1.721356 | 0.705467 |
| UEVLD    | 0.90833  | 0.643589 | 1.281973 | 0.584422 |
| TMEM86A  | 0.88957  | 0.647993 | 1.22121  | 0.469177 |
| BTBD11   | 0.855059 | 0.725822 | 1.007307 | 0.061085 |
| UBE3B    | 0.958086 | 0.587208 | 1.563211 | 0.863893 |
| ANK3     | 1.137089 | 0.854247 | 1.513581 | 0.378643 |
| IPMK     | 0.948914 | 0.689532 | 1.305867 | 0.74755  |
| RAD9B    | 0.992272 | 0.601536 | 1.636817 | 0.975765 |
| DLG5     | 0.968684 | 0.788604 | 1.189884 | 0.761735 |
| SLC2A13  | 0.853633 | 0.630071 | 1.156521 | 0.30706  |
| GXYLT1   | 0.864491 | 0.571955 | 1.306648 | 0.489624 |
| TWF1     | 0.796181 | 0.496322 | 1.277205 | 0.344527 |
| DIP2C    | 0.740579 | 0.439952 | 1.246631 | 0.258351 |
| EIF4E    | 0.634028 | 0.355318 | 1.131357 | 0.123015 |
| MAGI1    | 1.063862 | 0.703963 | 1.607758 | 0.768888 |
| CSNK1G3  | 1.135939 | 0.78777  | 1.637987 | 0.494897 |
| SRFBP1   | 0.772161 | 0.509914 | 1.16928  | 0.221978 |
| FAM177A1 | 0.574604 | 0.279381 | 1.181791 | 0.132074 |
| MBIP     | 0.809686 | 0.576778 | 1.136642 | 0.222512 |
| EXT2     | 0.705723 | 0.474925 | 1.048681 | 0.084574 |
| TMEM18   | 0.821273 | 0.485093 | 1.390432 | 0.46358  |
| THRSP    | 0.584846 | 0.332062 | 1.030061 | 0.063253 |
| NDUFC2   | 0.791178 | 0.482516 | 1.29729  | 0.353217 |
| ME3      | 1.150922 | 0.963604 | 1.374652 | 0.120925 |
| NUBPL    | 0.740531 | 0.455689 | 1.203423 | 0.225313 |
| NEK7     | 0.812575 | 0.512535 | 1.288258 | 0.377394 |
| FER      | 0.831449 | 0.636116 | 1.086763 | 0.176697 |
| ANKRD50  | 0.714952 | 0.562766 | 0.908291 | 0.006003 |
| UPF2     | 1.161404 | 0.738564 | 1.826328 | 0.517079 |
| CDC123   | 1.643886 | 0.991092 | 2.726652 | 0.054191 |
| SCLT1    | 0.761999 | 0.483973 | 1.199741 | 0.240536 |
| CCDC3    | 1.227365 | 1.046688 | 1.43923  | 0.011682 |
| FRMD4A   | 0.947459 | 0.713275 | 1.25853  | 0.709458 |
| PTPRO    | 1.418405 | 1.127862 | 1.783794 | 0.0028   |
| EPS8     | 1.254726 | 1.057789 | 1.488327 | 0.00919  |
| ACAD8    | 0.904297 | 0.556781 | 1.468717 | 0.684345 |
| THYN1    | 1.523175 | 0.861709 | 2.692395 | 0.147658 |
| VPS26B   | 1.563829 | 0.877952 | 2.78553  | 0.129001 |
| NCAPD3   | 1.180582 | 0.787885 | 1.769007 | 0.421078 |
| VTI1A    | 1.117164 | 0.557474 | 2.238769 | 0.754746 |
| QDPR     | 1.753233 | 0.98058  | 3.134702 | 0.058249 |
| FAM160B1 | 0.750816 | 0.527369 | 1.068937 | 0.111814 |
| TEX9     | 0.960034 | 0.635629 | 1.450007 | 0.846284 |
| MMAA     | 1.102783 | 0.689388 | 1.764072 | 0.683143 |
| ZNF827   | 1.094273 | 0.925747 | 1.293478 | 0.29107  |
| NR3C2    | 0.822811 | 0.564192 | 1.199979 | 0.311046 |
| AKR1C2   | 1.299306 | 0.929258 | 1.816713 | 0.125778 |
| DPYSL4   | 1.383997 | 0.961922 | 1.991271 | 0.079978 |
| VENTX    | 1.221656 | 1.084148 | 1.376604 | 0.001016 |
| ADAM8    | 1.113244 | 0.956511 | 1.295659 | 0.165853 |
| ITIH2    | 1.3817   | 0.93762  | 2.036106 | 0.102182 |

|          |          |          |          |          |
|----------|----------|----------|----------|----------|
| KIN      | 1.083708 | 0.618544 | 1.898687 | 0.778738 |
| PIGF     | 0.721172 | 0.454582 | 1.144104 | 0.165066 |
| ANKAR    | 0.794962 | 0.524541 | 1.204795 | 0.27939  |
| INPP1    | 1.670564 | 1.111913 | 2.509893 | 0.013484 |
| MFSD6    | 1.260477 | 0.937738 | 1.694292 | 0.125035 |
| RNF144A  | 0.884337 | 0.674035 | 1.160255 | 0.374995 |
| ASAP2    | 1.067134 | 0.880135 | 1.293863 | 0.508596 |
| ADAM17   | 0.856079 | 0.571372 | 1.282651 | 0.451288 |
| FLI1     | 0.955563 | 0.634521 | 1.439037 | 0.827744 |
| KCNJ1    | 0.907371 | 0.700532 | 1.175281 | 0.461483 |
| TMEM45B  | 0.696188 | 0.356149 | 1.360881 | 0.289628 |
| WWC2     | 0.758029 | 0.627744 | 0.915354 | 0.003987 |
| ACSL1    | 1.103089 | 0.934315 | 1.302351 | 0.246844 |
| SLC25A4  | 1.576171 | 1.052553 | 2.360274 | 0.027204 |
| AMN1     | 0.881532 | 0.547507 | 1.419339 | 0.603838 |
| BICD1    | 0.937219 | 0.668363 | 1.314226 | 0.707004 |
| SAV1     | 1.334808 | 0.9561   | 1.863521 | 0.089834 |
| CCDC122  | 0.972129 | 0.701814 | 1.34656  | 0.86498  |
| SERP2    | 0.992438 | 0.840428 | 1.171941 | 0.928693 |
| NBAS     | 0.877095 | 0.616523 | 1.247796 | 0.465926 |
| ZNF385D  | 0.94937  | 0.773063 | 1.165886 | 0.620113 |
| GUF1     | 0.826859 | 0.502757 | 1.359892 | 0.453877 |
| SACS     | 0.842194 | 0.616576 | 1.150371 | 0.280373 |
| PABPC3   | 1.095832 | 0.749138 | 1.602973 | 0.637227 |
| CENPJ    | 0.74068  | 0.566556 | 0.968318 | 0.028134 |
| FBXO4    | 1.005529 | 0.604832 | 1.671686 | 0.983038 |
| CCL28    | 1.103031 | 0.902845 | 1.347604 | 0.337201 |
| PARP8    | 1.033568 | 0.84646  | 1.262037 | 0.745915 |
| DST      | 0.945091 | 0.787246 | 1.134584 | 0.544709 |
| BEND6    | 0.928372 | 0.781236 | 1.103219 | 0.398563 |
| TIAL1    | 0.820958 | 0.418245 | 1.611427 | 0.566409 |
| BAG3     | 1.348175 | 1.134793 | 1.601679 | 0.000678 |
| GLT1D1   | 1.001663 | 0.86623  | 1.15827  | 0.982119 |
| SCHIP1   | 1.300567 | 1.104983 | 1.53077  | 0.001575 |
| AP1S3    | 1.313166 | 1.061579 | 1.624378 | 0.012051 |
| RABGAP1L | 0.838263 | 0.523477 | 1.342342 | 0.462706 |
| TUBA3E   | 0.976008 | 0.587096 | 1.622549 | 0.925394 |
| FAM168B  | 1.239196 | 0.659239 | 2.329363 | 0.505406 |
| PTPN14   | 0.82801  | 0.698374 | 0.98171  | 0.029822 |
| MGAT5    | 1.00284  | 0.631674 | 1.592099 | 0.990406 |
| TMEM163  | 1.272188 | 0.997631 | 1.622305 | 0.052277 |
| GEMIN6   | 1.293286 | 0.782534 | 2.137403 | 0.315703 |
| POU4F1   | 0.87395  | 0.748004 | 1.021103 | 0.089708 |
| CYSLTR2  | 1.097009 | 0.946818 | 1.271024 | 0.217761 |
| ARL11    | 0.913671 | 0.649647 | 1.284997 | 0.603852 |
| SETBP1   | 1.157973 | 1.002817 | 1.337135 | 0.045686 |
| PSTPIP2  | 1.31728  | 1.005884 | 1.725076 | 0.045221 |
| SPC25    | 0.947026 | 0.69737  | 1.286058 | 0.727384 |
| PDK1     | 0.776458 | 0.570807 | 1.056201 | 0.107034 |
| PDE3B    | 0.686689 | 0.560471 | 0.841331 | 0.000287 |
| TCF7L1   | 1.350407 | 0.675718 | 2.698759 | 0.395118 |
| TGOLN2   | 0.856274 | 0.541664 | 1.353617 | 0.506633 |
| KCNK13   | 1.049522 | 0.76346  | 1.442769 | 0.765938 |
| UHMK1    | 1.031306 | 0.69356  | 1.533527 | 0.878962 |
| ATG10    | 0.821645 | 0.488335 | 1.382454 | 0.459299 |
| SPOCK1   | 1.239185 | 1.018917 | 1.507071 | 0.031742 |
| FAM151B  | 0.997529 | 0.797413 | 1.247865 | 0.98272  |
| CWF19L2  | 1.006345 | 0.643454 | 1.573897 | 0.977886 |

|          |          |          |          |          |
|----------|----------|----------|----------|----------|
| JMY      | 0.899667 | 0.740096 | 1.093642 | 0.288516 |
| HOMER1   | 0.908505 | 0.657541 | 1.255254 | 0.56075  |
| XRCC4    | 1.061321 | 0.710933 | 1.584401 | 0.770964 |
| ZNF547   | 0.959946 | 0.648751 | 1.420415 | 0.83798  |
| ZNF773   | 0.864933 | 0.533914 | 1.401179 | 0.555509 |
| ZNF776   | 0.906866 | 0.631057 | 1.303222 | 0.597205 |
| ZNF256   | 1.129458 | 0.881106 | 1.447811 | 0.336611 |
| SUV39H2  | 0.725666 | 0.496217 | 1.06121  | 0.098208 |
| DCLRE1C  | 0.94549  | 0.586028 | 1.525441 | 0.818348 |
| OLAH     | 1.230702 | 1.03184  | 1.467889 | 0.020969 |
| RPP38    | 1.12648  | 0.596641 | 2.126837 | 0.713401 |
| NMT2     | 0.574433 | 0.425163 | 0.776109 | 0.000305 |
| ZNF837   | 0.877746 | 0.658459 | 1.170062 | 0.373949 |
| USP12    | 0.71203  | 0.473024 | 1.0718   | 0.103597 |
| CCDC50   | 1.092982 | 0.933855 | 1.279223 | 0.268075 |
| CAMK4    | 0.826466 | 0.619624 | 1.102355 | 0.19467  |
| TRIM36   | 0.715859 | 0.526227 | 0.973828 | 0.033265 |
| ZFP36L2  | 1.288724 | 0.923425 | 1.798533 | 0.135826 |
| PAN3     | 0.80997  | 0.5526   | 1.187209 | 0.279995 |
| PFKM     | 1.232317 | 0.928881 | 1.634876 | 0.147497 |
| TMEM123  | 0.895839 | 0.61048  | 1.314584 | 0.574026 |
| IGSF10   | 1.136851 | 1.020099 | 1.266966 | 0.020347 |
| SPEF2    | 0.793615 | 0.577192 | 1.091188 | 0.154789 |
| MBNL1    | 0.877098 | 0.546228 | 1.408389 | 0.587324 |
| GPD1L    | 1.428791 | 0.971454 | 2.10143  | 0.069858 |
| GJA1     | 0.979944 | 0.842558 | 1.139733 | 0.792649 |
| SLC30A6  | 0.759711 | 0.466237 | 1.237912 | 0.269938 |
| PELO     | 1.669433 | 1.077214 | 2.587236 | 0.021865 |
| RASGRP3  | 1.033695 | 0.871193 | 1.226508 | 0.704114 |
| SAR1B    | 0.686371 | 0.393736 | 1.196499 | 0.184423 |
| CATSPER3 | 0.677633 | 0.366807 | 1.251848 | 0.213987 |
| GPR180   | 0.811041 | 0.518628 | 1.268323 | 0.358595 |
| TCTEX1D1 | 1.047695 | 0.928585 | 1.182083 | 0.449248 |
| ANKRD22  | 0.910249 | 0.736901 | 1.124376 | 0.382986 |
| FARP1    | 1.098814 | 0.628588 | 1.9208   | 0.740883 |
| IFIT5    | 1.446841 | 1.115676 | 1.876304 | 0.005347 |
| PANK1    | 1.143668 | 0.86423  | 1.51346  | 0.347658 |
| PRDM8    | 1.02537  | 0.82883  | 1.268517 | 0.817501 |
| BMP3     | 1.032093 | 0.857548 | 1.242165 | 0.738239 |
| HHEX     | 0.929753 | 0.628968 | 1.37438  | 0.71492  |
| UTRN     | 0.948465 | 0.703298 | 1.279095 | 0.728774 |
| PTPRK    | 0.848556 | 0.470151 | 1.531525 | 0.585695 |
| GGPS1    | 1.444445 | 0.83151  | 2.509194 | 0.191856 |
| ZNF117   | 0.722072 | 0.550916 | 0.946402 | 0.018322 |
| MARVELD1 | 1.217645 | 0.907574 | 1.633651 | 0.189109 |
| RAD17    | 0.638137 | 0.389362 | 1.045862 | 0.074738 |
| MED21    | 0.545759 | 0.377227 | 0.789585 | 0.00131  |
| PLOD2    | 0.847378 | 0.599812 | 1.197125 | 0.347533 |
| STK32B   | 0.949801 | 0.823079 | 1.096033 | 0.480865 |
| CPB1     | 0.950099 | 0.461291 | 1.956873 | 0.889563 |
| MR1      | 1.616697 | 1.084496 | 2.410067 | 0.018366 |
| SRP19    | 0.466668 | 0.275432 | 0.790682 | 0.004612 |
| CENPH    | 1.145911 | 0.82174  | 1.597965 | 0.422107 |
| CDYL     | 0.929108 | 0.497787 | 1.734159 | 0.817364 |
| CARHSP1  | 0.961141 | 0.569732 | 1.621451 | 0.881915 |
| BANK1    | 1.121548 | 0.92893  | 1.354107 | 0.232811 |
| TXNDC11  | 1.894377 | 1.083539 | 3.311986 | 0.024997 |
| DAB2     | 1.174231 | 0.916923 | 1.503744 | 0.203124 |



|          |          |          |          |          |
|----------|----------|----------|----------|----------|
| ACMSD    | 0.608838 | 0.337071 | 1.09972  | 0.099998 |
| BCL2L11  | 1.531096 | 1.187002 | 1.974939 | 0.001038 |
| ANAPC1   | 0.850259 | 0.580351 | 1.245696 | 0.405135 |
| CAST     | 1.174202 | 0.944483 | 1.459794 | 0.148247 |
| SCOC     | 0.886787 | 0.601182 | 1.308075 | 0.544627 |
| CLGN     | 1.006531 | 0.863038 | 1.173883 | 0.933886 |
| CETN3    | 0.846295 | 0.572179 | 1.251734 | 0.403345 |
| SMARCA5  | 1.039954 | 0.694558 | 1.557111 | 0.849136 |
| SYCP2L   | 0.851198 | 0.680297 | 1.065033 | 0.158847 |
| BMP6     | 1.018111 | 0.797089 | 1.300419 | 0.885704 |
| RGPD3    | 0.251074 | 0.05539  | 1.138072 | 0.073095 |
| RASSF3   | 1.290291 | 0.951706 | 1.749333 | 0.100753 |
| HNRNPU   | 0.949584 | 0.570367 | 1.580927 | 0.842334 |
| RANBP2   | 0.995427 | 0.699987 | 1.415562 | 0.979647 |
| AHCTF1   | 0.82046  | 0.528381 | 1.273995 | 0.378102 |
| MERTK    | 0.922857 | 0.751963 | 1.13259  | 0.442283 |
| TMEM87B  | 1.300105 | 0.805972 | 2.097184 | 0.282028 |
| NR4A2    | 0.940558 | 0.813516 | 1.087441 | 0.407828 |
| RBMS1    | 0.860305 | 0.569008 | 1.300729 | 0.475603 |
| SCN3A    | 1.137326 | 0.958109 | 1.350067 | 0.141337 |
| CD96     | 0.919132 | 0.827057 | 1.021459 | 0.117412 |
| ASAP1    | 1.072806 | 0.830645 | 1.385566 | 0.590294 |
| FAM81B   | 1.535689 | 1.060226 | 2.224376 | 0.023248 |
| INO80C   | 0.699508 | 0.457641 | 1.069203 | 0.098766 |
| LPCAT1   | 1.457521 | 1.051407 | 2.020501 | 0.023772 |
| NMRAL1   | 1.442495 | 0.876004 | 2.375323 | 0.149942 |
| ING1     | 0.831526 | 0.434953 | 1.589675 | 0.576841 |
| ADPRHL1  | 0.838798 | 0.561221 | 1.253664 | 0.39125  |
| CMTM7    | 1.018457 | 0.765522 | 1.354964 | 0.900083 |
| FBXL2    | 1.077051 | 0.66482  | 1.744892 | 0.763005 |
| UBP1     | 1.375533 | 0.776233 | 2.437528 | 0.274728 |
| RMND5A   | 1.195136 | 0.774461 | 1.844314 | 0.42064  |
| CD8A     | 1.033501 | 0.84398  | 1.265582 | 0.749866 |
| RPIA     | 1.167693 | 0.732376 | 1.861756 | 0.514815 |
| PTPRD    | 0.932561 | 0.753758 | 1.153779 | 0.520301 |
| CNKSR3   | 1.107492 | 0.758525 | 1.617007 | 0.597    |
| GTF2E1   | 1.033192 | 0.677751 | 1.575043 | 0.879352 |
| CFDP1    | 0.725147 | 0.39205  | 1.34125  | 0.305718 |
| ZDHHC7   | 1.556865 | 1.092106 | 2.219406 | 0.014405 |
| JAZF1    | 0.990807 | 0.798614 | 1.229253 | 0.933102 |
| CMIP     | 1.255535 | 0.795422 | 1.981801 | 0.328497 |
| PID1     | 1.12183  | 0.931866 | 1.350518 | 0.224565 |
| TRIP12   | 0.855112 | 0.546055 | 1.33909  | 0.493981 |
| FBXO36   | 0.748645 | 0.443683 | 1.263222 | 0.27812  |
| CEBPG    | 1.138403 | 0.749768 | 1.728484 | 0.542947 |
| KCTD15   | 0.73606  | 0.615258 | 0.880581 | 0.000807 |
| ZNF599   | 0.667444 | 0.451768 | 0.986086 | 0.042323 |
| MCOLN2   | 1.324591 | 1.081335 | 1.62257  | 0.006622 |
| LGI4     | 1.355407 | 0.734898 | 2.499841 | 0.330204 |
| DDAH1    | 1.13566  | 0.928089 | 1.389655 | 0.216719 |
| CHD1     | 0.590552 | 0.398259 | 0.87569  | 0.008783 |
| DGKE     | 1.059401 | 0.834325 | 1.345197 | 0.635831 |
| HS2ST1   | 0.975811 | 0.676214 | 1.408145 | 0.895889 |
| MSI2     | 0.955807 | 0.808498 | 1.129957 | 0.596618 |
| HS3ST3A1 | 0.406955 | 0.203803 | 0.812609 | 0.010832 |
| GDPD1    | 1.131202 | 0.897244 | 1.426163 | 0.29704  |
| NUS1     | 1.034158 | 0.617586 | 1.731713 | 0.89839  |
| PPP2R5E  | 0.819642 | 0.491223 | 1.367634 | 0.44642  |

|         |          |          |          |          |
|---------|----------|----------|----------|----------|
| GRAP    | 1.670391 | 1.173453 | 2.377774 | 0.004402 |
| SLC5A10 | 1.225553 | 0.896735 | 1.674945 | 0.201916 |
| AK5     | 1.031108 | 0.880142 | 1.207968 | 0.704483 |
| CABYR   | 1.127733 | 0.793746 | 1.602254 | 0.502311 |
| IMPACT  | 1.049994 | 0.758935 | 1.452677 | 0.768343 |
| TBCEL   | 0.892597 | 0.566394 | 1.40667  | 0.624418 |
| JPH3    | 0.473472 | 0.23152  | 0.968276 | 0.040532 |
| ANKH    | 0.835861 | 0.635936 | 1.098638 | 0.198621 |
| UBASH3B | 1.094155 | 0.90202  | 1.327216 | 0.361077 |
| ROBO4   | 1.156983 | 0.996288 | 1.343596 | 0.055977 |
| ROBO3   | 1.32738  | 1.118444 | 1.575348 | 0.001191 |
| TBRG1   | 1.066475 | 0.648677 | 1.753367 | 0.799718 |
| NRGN    | 1.278269 | 1.110566 | 1.471296 | 0.000623 |
| GPR15   | 1.117139 | 0.869947 | 1.43457  | 0.385338 |
| ABI3BP  | 1.02608  | 0.583754 | 1.803571 | 0.928711 |
| ANGPT1  | 1.112468 | 0.978707 | 1.264511 | 0.102961 |
| PITPNC1 | 1.066778 | 0.799662 | 1.423121 | 0.660223 |
| CC2D1B  | 1.319378 | 0.824598 | 2.111039 | 0.247785 |
| PRKCA   | 0.99151  | 0.84273  | 1.166555 | 0.918131 |
| LRRK1   | 1.35165  | 1.005254 | 1.817409 | 0.04608  |
| GAL3ST2 | 1.408851 | 1.027932 | 1.930927 | 0.033068 |
| ABCA5   | 1.181786 | 0.950997 | 1.468583 | 0.131883 |
| ENPP3   | 0.878203 | 0.695738 | 1.108521 | 0.27441  |
| UCHL1   | 1.053473 | 0.862281 | 1.287058 | 0.610179 |
| MIA3    | 0.65385  | 0.428456 | 0.997815 | 0.048826 |
| DISP1   | 0.958355 | 0.566336 | 1.621731 | 0.874071 |
| TNIK    | 0.924916 | 0.756708 | 1.130515 | 0.445983 |
| TDH     | 1.971053 | 1.025767 | 3.787462 | 0.04172  |
| FAM167A | 0.819375 | 0.587553 | 1.142663 | 0.240385 |
| NEIL2   | 0.87426  | 0.573266 | 1.333291 | 0.532582 |
| OBSCN   | 0.998041 | 0.823905 | 1.208982 | 0.984008 |
| LONRF1  | 0.641664 | 0.412592 | 0.997916 | 0.048928 |
| TRIM11  | 1.433216 | 0.859317 | 2.390395 | 0.167883 |
| ENAH    | 0.971353 | 0.793168 | 1.189567 | 0.778632 |
| SH3RF1  | 0.836922 | 0.646089 | 1.08412  | 0.177574 |
| GBP5    | 1.021801 | 0.838149 | 1.245693 | 0.831055 |
| BUB3    | 1.326144 | 0.718549 | 2.447514 | 0.366617 |
| MMP21   | 0.746953 | 0.430412 | 1.29629  | 0.299593 |
| LY96    | 1.152657 | 1.004448 | 1.322734 | 0.043055 |
| TMSB4Y  | 0.942016 | 0.785565 | 1.129626 | 0.519176 |
| CXADR   | 0.946957 | 0.61695  | 1.453484 | 0.803119 |
| BTG3    | 1.111875 | 0.903456 | 1.368375 | 0.31667  |
| NCAM2   | 1.133709 | 0.780701 | 1.646335 | 0.50969  |
| L3MBTL4 | 1.155104 | 0.993434 | 1.343085 | 0.060885 |
| RABGEF1 | 0.659383 | 0.397396 | 1.094085 | 0.106978 |
| MRPL39  | 1.579138 | 0.986971 | 2.526597 | 0.056745 |
| GABPA   | 0.837716 | 0.542118 | 1.294491 | 0.425166 |
| ADAMTS1 | 0.816211 | 0.677059 | 0.983962 | 0.033213 |
| TSEN2   | 0.804703 | 0.54711  | 1.183576 | 0.269686 |
| SLFN13  | 0.973945 | 0.814783 | 1.164198 | 0.77182  |
| XPC     | 1.254885 | 0.761976 | 2.066649 | 0.3724   |
| FGD5    | 1.11476  | 0.954871 | 1.30142  | 0.169023 |
| FLCN    | 0.874541 | 0.569721 | 1.342451 | 0.539812 |
| DPH3    | 0.937221 | 0.617984 | 1.421368 | 0.760261 |
| OXNAD1  | 0.894708 | 0.597553 | 1.339632 | 0.589045 |
| PLCL2   | 1.21821  | 0.960728 | 1.544699 | 0.103257 |
| CXXC1   | 1.119334 | 0.757041 | 1.655007 | 0.572075 |
| SKA1    | 1.019248 | 0.749101 | 1.386818 | 0.903421 |

|          |          |          |          |          |
|----------|----------|----------|----------|----------|
| PPP4R1   | 0.893562 | 0.544426 | 1.466597 | 0.656199 |
| CCDC144E | 0.925905 | 0.768617 | 1.115379 | 0.417688 |
| MPPE1    | 1.231058 | 0.79881  | 1.897201 | 0.346187 |
| USP43    | 1.19513  | 0.898451 | 1.589776 | 0.220794 |
| RAB6B    | 0.786286 | 0.615285 | 1.004812 | 0.054657 |
| EME1     | 0.8728   | 0.61063  | 1.24753  | 0.455381 |
| EPHB1    | 1.166337 | 0.841098 | 1.617342 | 0.356273 |
| ACSS1    | 1.116822 | 0.755051 | 1.651929 | 0.580134 |
| ANKRD40  | 1.415071 | 0.845826 | 2.367421 | 0.186084 |
| ZNF18    | 0.87881  | 0.495104 | 1.559889 | 0.659017 |
| VOPP1    | 1.380261 | 1.038121 | 1.835163 | 0.026598 |
| APOOL    | 0.560284 | 0.305659 | 1.027021 | 0.060968 |
| CYP2U1   | 1.202404 | 0.982131 | 1.472079 | 0.074209 |
| FBXL18   | 0.918251 | 0.533624 | 1.580111 | 0.758114 |
| KLF10    | 1.154774 | 0.93143  | 1.431674 | 0.189445 |
| PTPRN2   | 1.258221 | 1.048712 | 1.509584 | 0.013444 |
| AZIN1    | 1.067225 | 0.676425 | 1.683805 | 0.779748 |
| ATP6V1C1 | 0.953389 | 0.601859 | 1.510238 | 0.83884  |
| OTUD6B   | 0.693928 | 0.433743 | 1.110187 | 0.127512 |
| GTF3C6   | 1.52625  | 0.868849 | 2.681063 | 0.141321 |
| TTC39B   | 1.211037 | 0.942495 | 1.556093 | 0.134405 |
| AGPAT5   | 0.814856 | 0.623529 | 1.064891 | 0.133744 |
| MMS19    | 1.055467 | 0.652335 | 1.707728 | 0.82596  |
| PI4K2A   | 1.353674 | 1.077929 | 1.699958 | 0.009169 |
| MARVELD  | 1.099962 | 0.911041 | 1.328058 | 0.321711 |
| ZFYVE27  | 1.181641 | 0.72071  | 1.937362 | 0.508206 |
| GOLGA7B  | 1.3496   | 0.783633 | 2.324328 | 0.279732 |
| SLC25A28 | 1.760672 | 1.187128 | 2.611315 | 0.004909 |
| HSPA13   | 0.86658  | 0.591503 | 1.269581 | 0.46237  |
| SAMSN1   | 1.087426 | 0.822757 | 1.437235 | 0.555874 |
| USP25    | 1.370412 | 0.894277 | 2.100054 | 0.147927 |
| ZCCHC10  | 0.712794 | 0.458522 | 1.10807  | 0.132562 |
| MOV10    | 1.07296  | 0.778106 | 1.479546 | 0.667518 |
| RHOC     | 1.423431 | 1.12568  | 1.799941 | 0.003191 |
| PPM1J    | 1.317879 | 1.036982 | 1.674866 | 0.024015 |
| DBI      | 1.034916 | 0.772118 | 1.38716  | 0.818382 |
| SLC16A1  | 1.095301 | 0.901521 | 1.330734 | 0.359485 |
| HEATR3   | 0.972673 | 0.624401 | 1.515201 | 0.902492 |
| TRIM74   | 0.731836 | 0.535112 | 1.00088  | 0.050647 |
| OXA1L    | 1.858033 | 1.02622  | 3.364083 | 0.040814 |
| SLC7A7   | 1.111006 | 0.987021 | 1.250565 | 0.081232 |
| LARP1    | 0.551153 | 0.334099 | 0.909222 | 0.01967  |
| CNOT8    | 0.693018 | 0.453198 | 1.059744 | 0.09061  |
| LRGUK    | 0.803993 | 0.558846 | 1.156678 | 0.239745 |
| MIER3    | 0.850414 | 0.59141  | 1.222846 | 0.381925 |
| NUP205   | 0.901133 | 0.598059 | 1.357795 | 0.6187   |
| ZKSCAN2  | 1.063714 | 0.663246 | 1.705983 | 0.797736 |
| PIK3AP1  | 1.288204 | 0.970445 | 1.710009 | 0.07971  |
| RBM45    | 1.285061 | 0.751001 | 2.198907 | 0.36012  |
| TTN      | 0.732729 | 0.533965 | 1.005482 | 0.054092 |
| VSIG4    | 1.022081 | 0.910937 | 1.146787 | 0.710007 |
| PDIA4    | 0.722004 | 0.516258 | 1.009746 | 0.057003 |
| OTOA     | 1.795935 | 1.279386 | 2.521041 | 0.000715 |
| KCTD18   | 0.800627 | 0.412195 | 1.555096 | 0.511532 |
| FAM126B  | 0.782007 | 0.472095 | 1.295363 | 0.339611 |
| FZD7     | 0.913805 | 0.681426 | 1.22543  | 0.547124 |
| RNF20    | 1.03472  | 0.660386 | 1.621241 | 0.881581 |
| PPARGC1E | 1.289645 | 0.922126 | 1.803641 | 0.137211 |

|         |          |          |          |          |
|---------|----------|----------|----------|----------|
| ELMO1   | 0.964532 | 0.66805  | 1.392595 | 0.847187 |
| SLC26A2 | 0.709042 | 0.52579  | 0.956164 | 0.02421  |
| LSM11   | 0.868666 | 0.564923 | 1.335721 | 0.521288 |
| MED7    | 0.787237 | 0.486217 | 1.274621 | 0.330543 |
| RRAGA   | 2.601293 | 1.380791 | 4.900618 | 0.003092 |
| RASA2   | 1.035375 | 0.684315 | 1.566533 | 0.869307 |
| RMND1   | 0.761143 | 0.440505 | 1.315169 | 0.328008 |
| SLA     | 1.319015 | 1.065359 | 1.633066 | 0.011054 |
| TMBIM4  | 0.768228 | 0.514716 | 1.146602 | 0.196901 |
| VBP1    | 1.039509 | 0.66793  | 1.617804 | 0.863674 |
| RAB39B  | 1.191466 | 0.911302 | 1.557761 | 0.200242 |
| CLIC2   | 1.239159 | 1.064618 | 1.442315 | 0.005634 |
| AFF2    | 0.783107 | 0.678925 | 0.903277 | 0.000789 |
| GRIP1   | 0.79686  | 0.597778 | 1.062244 | 0.121561 |
| VPS37A  | 0.521022 | 0.329856 | 0.822977 | 0.005185 |
| PSD3    | 1.062601 | 0.885918 | 1.274522 | 0.512834 |
| GNA14   | 1.139333 | 0.864985 | 1.500698 | 0.353385 |
| FAM161B | 1.011723 | 0.570266 | 1.794924 | 0.968216 |
| GNAQ    | 0.920932 | 0.589477 | 1.438757 | 0.71746  |
| GPR61   | 0.181815 | 0.038306 | 0.862963 | 0.031917 |
| ADK     | 1.481766 | 0.935859 | 2.346112 | 0.093499 |
| BATF    | 2.333146 | 1.577199 | 3.451417 | 2.23E-05 |
| DCK     | 1.071625 | 0.795913 | 1.442847 | 0.648513 |
| ADAMTS3 | 0.829761 | 0.668017 | 1.030668 | 0.09162  |
| ALX3    | 0.551561 | 0.114511 | 2.656671 | 0.458201 |
| DPY19L4 | 0.703242 | 0.469963 | 1.052314 | 0.086897 |
| ART3    | 0.928988 | 0.459983 | 1.876199 | 0.837268 |
| WHAMM   | 1.498494 | 0.848484 | 2.646466 | 0.163387 |
| CXCL13  | 1.086306 | 0.662127 | 1.782227 | 0.743118 |
| N6AMT1  | 0.942668 | 0.651186 | 1.364622 | 0.754417 |
| RWDD2B  | 1.678424 | 1.054023 | 2.672718 | 0.029138 |
| USP16   | 0.648505 | 0.406091 | 1.035628 | 0.069773 |
| CCT8    | 1.267876 | 0.81301  | 1.977231 | 0.295157 |
| BACH1   | 0.811608 | 0.567379 | 1.160965 | 0.253112 |
| TSPAN7  | 0.979508 | 0.868638 | 1.104529 | 0.735499 |
| TIAM1   | 1.022142 | 0.843772 | 1.238219 | 0.822892 |
| RPGR    | 0.584434 | 0.4137   | 0.82563  | 0.002312 |
| PCGF6   | 0.841907 | 0.463936 | 1.527813 | 0.571405 |
| ANKRD9  | 1.310511 | 1.024714 | 1.676018 | 0.031203 |
| SFXN2   | 0.989414 | 0.692761 | 1.413099 | 0.953332 |
| FUT6    | 1.32497  | 0.947736 | 1.852358 | 0.09977  |
| TDRD9   | 0.797038 | 0.698961 | 0.908876 | 0.000709 |
| FGF18   | 0.99012  | 0.667051 | 1.469659 | 0.960701 |
| PCDH1   | 0.90977  | 0.577142 | 1.434104 | 0.683825 |
| UQCRB   | 1.165031 | 0.693481 | 1.957226 | 0.563881 |
| PTDSS1  | 1.206313 | 0.824701 | 1.764508 | 0.333709 |
| RPL30   | 0.932472 | 0.601753 | 1.444952 | 0.754383 |
| FAM122C | 1.218331 | 0.69418  | 2.138251 | 0.491393 |
| SUPV3L1 | 0.961121 | 0.569301 | 1.62261  | 0.882016 |
| FAM122B | 0.898613 | 0.618345 | 1.305913 | 0.575124 |
| EEF1A1  | 1.017429 | 0.744129 | 1.391106 | 0.91379  |
| FBXO43  | 1.06504  | 0.782683 | 1.449258 | 0.688472 |
| HK1     | 1.44558  | 1.094782 | 1.908783 | 0.009363 |
| TYSND1  | 1.477396 | 0.965772 | 2.260056 | 0.071957 |
| PHF6    | 1.014844 | 0.709689 | 1.451212 | 0.935642 |
| CD109   | 1.17107  | 1.04641  | 1.310581 | 0.00596  |
| NODAL   | 0.843807 | 0.539801 | 1.319024 | 0.456198 |
| PRG3    | 0.998023 | 0.81368  | 1.224129 | 0.984843 |

|           |          |          |          |          |
|-----------|----------|----------|----------|----------|
| UBE2L6    | 1.547431 | 1.047846 | 2.285207 | 0.028169 |
| ZDHHC5    | 1.654845 | 0.902304 | 3.035021 | 0.103578 |
| MED19     | 0.87022  | 0.419331 | 1.805931 | 0.709015 |
| ZFAND3    | 1.63877  | 0.811612 | 3.30893  | 0.16828  |
| NPTN      | 1.354667 | 0.90375  | 2.030564 | 0.141586 |
| SAMD8     | 1.232076 | 0.858831 | 1.767532 | 0.257023 |
| RAB11FIP1 | 1.083786 | 0.856675 | 1.371106 | 0.502467 |
| GLYATL2   | 1.044734 | 0.78554  | 1.389451 | 0.763566 |
| UTP14A    | 1.3755   | 0.822646 | 2.299895 | 0.22414  |
| AIFM1     | 2.494999 | 1.231583 | 5.054488 | 0.011141 |
| MAPK13    | 0.978865 | 0.709849 | 1.349833 | 0.896338 |
| BAG4      | 1.163442 | 0.711713 | 1.901888 | 0.546031 |
| MS4A1     | 0.955881 | 0.774749 | 1.179361 | 0.673798 |
| ATAD2     | 1.087788 | 0.752639 | 1.57218  | 0.654313 |
| FBXO32    | 1.189271 | 0.876342 | 1.613941 | 0.265851 |
| NSMCE2    | 0.914136 | 0.499345 | 1.673479 | 0.771056 |
| ZNF689    | 1.334632 | 0.823449 | 2.163149 | 0.241377 |
| PRR14     | 0.967908 | 0.688987 | 1.359744 | 0.850813 |
| FBRS      | 1.135465 | 0.7791   | 1.654832 | 0.508566 |
| FRRS1     | 1.220958 | 0.903672 | 1.649647 | 0.193513 |
| PHKG2     | 0.797627 | 0.520545 | 1.222197 | 0.299058 |
| SASS6     | 0.970819 | 0.603845 | 1.560814 | 0.902704 |
| ITGAD     | 1.242171 | 0.935636 | 1.649134 | 0.133655 |
| VPS8      | 0.898288 | 0.569292 | 1.41741  | 0.644837 |
| GALK2     | 0.564354 | 0.366544 | 0.868914 | 0.009374 |
| B3GNT7    | 1.000839 | 0.850702 | 1.177473 | 0.991932 |
| MPV17L    | 1.404574 | 1.160614 | 1.699814 | 0.000483 |
| BUB1B     | 0.980811 | 0.740347 | 1.299377 | 0.892597 |
| PDE6D     | 1.237374 | 0.578047 | 2.648734 | 0.583352 |
| EIF4A2    | 1.064058 | 0.638042 | 1.774522 | 0.811925 |
| BRPF1     | 0.963936 | 0.6794   | 1.367638 | 0.836953 |
| RPUSD3    | 0.814427 | 0.565408 | 1.17312  | 0.270269 |
| TATDN2    | 0.934753 | 0.54111  | 1.61476  | 0.808847 |
| GHRL      | 0.802453 | 0.59487  | 1.082471 | 0.149565 |
| SEC13     | 0.81351  | 0.484347 | 1.366371 | 0.435325 |
| EXOG      | 1.110025 | 0.706005 | 1.745248 | 0.651191 |
| NTAN1     | 1.227923 | 0.792961 | 1.901472 | 0.357445 |
| ZFYVE9    | 0.876207 | 0.710667 | 1.080307 | 0.216106 |
| SMG1      | 0.782943 | 0.520418 | 1.1779   | 0.240298 |
| FCHO2     | 0.767421 | 0.636435 | 0.925365 | 0.005566 |
| RBPMS     | 1.097327 | 0.906923 | 1.327704 | 0.33948  |
| TIMP4     | 1.276251 | 1.052999 | 1.546837 | 0.012906 |
| CPT2      | 1.748334 | 0.833461 | 3.667446 | 0.139404 |
| NECAP2    | 1.921067 | 1.13686  | 3.246221 | 0.01472  |
| LRP8      | 1.349314 | 0.918004 | 1.98327  | 0.12736  |
| PAXIP1    | 0.714865 | 0.431775 | 1.183562 | 0.191949 |
| SSBP3     | 0.79799  | 0.562645 | 1.131774 | 0.205629 |
| CLDN12    | 0.689935 | 0.527795 | 0.901886 | 0.006618 |
| MMP14     | 0.859612 | 0.758333 | 0.974418 | 0.018023 |
| FZD1      | 1.282442 | 0.99118  | 1.659291 | 0.058415 |
| GATAD1    | 0.773757 | 0.477975 | 1.252576 | 0.296647 |
| SUSD3     | 1.232361 | 1.040198 | 1.460024 | 0.015708 |
| TMED6     | 0.877558 | 0.51441  | 1.49707  | 0.631738 |
| DHRS4     | 1.862381 | 1.120266 | 3.096108 | 0.016491 |
| DDX19B    | 1.163829 | 0.586053 | 2.311218 | 0.664705 |
| ST3GAL2   | 1.209894 | 0.813323 | 1.799831 | 0.347079 |
| IL34      | 0.913186 | 0.540862 | 1.541815 | 0.733983 |
| DHRS1     | 1.397097 | 0.850701 | 2.294439 | 0.186455 |

|          |          |          |          |          |
|----------|----------|----------|----------|----------|
| CACNA1D  | 0.515387 | 0.179597 | 1.479003 | 0.217823 |
| KIT      | 0.907556 | 0.798909 | 1.030978 | 0.135956 |
| AASDH    | 0.81587  | 0.522431 | 1.274129 | 0.370914 |
| ZNF19    | 0.631592 | 0.244541 | 1.631254 | 0.342537 |
| CACNA2D  | 1.171954 | 0.997591 | 1.376792 | 0.05353  |
| RNF111   | 0.737532 | 0.418182 | 1.30076  | 0.292958 |
| CCNB2    | 0.949318 | 0.723668 | 1.245329 | 0.707219 |
| FAM81A   | 1.412192 | 1.089135 | 1.831073 | 0.009208 |
| MYO1E    | 1.28019  | 1.021298 | 1.60471  | 0.032131 |
| APPL1    | 0.879918 | 0.594622 | 1.302098 | 0.522317 |
| AFAP1L1  | 0.719666 | 0.509305 | 1.016915 | 0.062199 |
| TSC22D3  | 1.224578 | 0.985562 | 1.521559 | 0.067446 |
| DYRK1A   | 1.168663 | 0.661624 | 2.064273 | 0.591302 |
| KCNJ15   | 1.024267 | 0.751404 | 1.396217 | 0.879425 |
| ERG      | 0.898616 | 0.776259 | 1.040259 | 0.152303 |
| ETS2     | 1.703472 | 1.283831 | 2.26028  | 0.000223 |
| TSPAN18  | 1.068597 | 0.840573 | 1.358477 | 0.58797  |
| LCA5L    | 0.666949 | 0.396292 | 1.122457 | 0.127254 |
| SLC35B2  | 1.078795 | 0.670033 | 1.736926 | 0.754952 |
| TMEM164  | 1.309547 | 0.851133 | 2.014859 | 0.219918 |
| MX1      | 1.303551 | 1.124712 | 1.510826 | 0.00043  |
| C2CD2    | 0.843272 | 0.647465 | 1.098294 | 0.206056 |
| SLC38A10 | 1.483901 | 1.029742 | 2.138365 | 0.034244 |
| ZNF618   | 1.041414 | 0.802627 | 1.351241 | 0.760078 |
| SVOPL    | 0.735389 | 0.512783 | 1.054633 | 0.09476  |
| SNX22    | 0.747747 | 0.527203 | 1.060551 | 0.103046 |
| UBN2     | 0.538844 | 0.373859 | 0.776636 | 0.000915 |
| BRAF     | 0.499436 | 0.296788 | 0.840452 | 0.008935 |
| PSMG3    | 1.496479 | 1.026571 | 2.181485 | 0.036052 |
| WDR19    | 0.587875 | 0.429231 | 0.805155 | 0.000931 |
| SLC37A3  | 0.991057 | 0.770354 | 1.274991 | 0.944283 |
| AP3S2    | 1.205742 | 0.693309 | 2.09692  | 0.507548 |
| FMNL2    | 1.171224 | 0.937465 | 1.463271 | 0.16409  |
| SPPL3    | 0.543789 | 0.253834 | 1.164963 | 0.117076 |
| RAB28    | 0.468167 | 0.285143 | 0.76867  | 0.0027   |
| TNFRSF14 | 1.029653 | 0.830703 | 1.27625  | 0.789658 |
| PANK4    | 1.59553  | 0.956624 | 2.661147 | 0.073444 |
| MEGF11   | 1.033113 | 0.679486 | 1.570778 | 0.878883 |
| PEX10    | 1.251755 | 0.779286 | 2.010676 | 0.353077 |
| RER1     | 2.272596 | 1.098964 | 4.699603 | 0.026792 |
| RADIL    | 0.925313 | 0.670406 | 1.277144 | 0.636846 |
| SKI      | 1.388739 | 0.943815 | 2.043404 | 0.09561  |
| WIPI2    | 0.879518 | 0.489339 | 1.580808 | 0.667808 |
| LDLRAP1  | 1.572822 | 1.159777 | 2.132968 | 0.003573 |
| AGAP1    | 1.052384 | 0.832779 | 1.329899 | 0.66896  |
| KRTCAP3  | 0.803856 | 0.503428 | 1.283567 | 0.360495 |
| PAFAH2   | 0.680066 | 0.419112 | 1.1035   | 0.11848  |
| MRPL17   | 1.589008 | 0.877301 | 2.878086 | 0.126503 |
| DUSP2    | 1.140387 | 0.929287 | 1.399442 | 0.208469 |
| UBXN11   | 1.2946   | 1.055749 | 1.587488 | 0.01309  |
| PTPDC1   | 0.949766 | 0.714999 | 1.261617 | 0.72201  |
| GALNT14  | 1.010457 | 0.867595 | 1.176845 | 0.893592 |
| NCK1     | 0.694636 | 0.425379 | 1.134325 | 0.145327 |
| HPD      | 1.134304 | 0.837077 | 1.537069 | 0.416301 |
| RHPN1    | 1.175964 | 1.011368 | 1.367347 | 0.035126 |
| TPRG1L   | 1.079338 | 0.650672 | 1.790414 | 0.76748  |
| LRRRC43  | 0.732613 | 0.52713  | 1.018196 | 0.06394  |
| XKR8     | 1.266011 | 0.769649 | 2.082487 | 0.352948 |

|          |          |          |          |          |
|----------|----------|----------|----------|----------|
| CNNM4    | 0.987922 | 0.656675 | 1.486261 | 0.953498 |
| EYA3     | 1.189467 | 0.729994 | 1.938143 | 0.486095 |
| DZIP1L   | 0.900903 | 0.660377 | 1.229036 | 0.510187 |
| TMSB15A  | 1.047504 | 0.805897 | 1.361544 | 0.728662 |
| FANCC    | 1.209677 | 0.769785 | 1.900946 | 0.409136 |
| MRAS     | 0.868891 | 0.712862 | 1.059071 | 0.164029 |
| WASF2    | 1.982343 | 1.190511 | 3.30084  | 0.008532 |
| ABHD3    | 0.67373  | 0.457026 | 0.993187 | 0.046099 |
| FAIM     | 0.634303 | 0.455641 | 0.883022 | 0.006997 |
| CLSTN2   | 1.082894 | 0.866035 | 1.354055 | 0.484882 |
| COLEC12  | 0.772693 | 0.555857 | 1.074116 | 0.124905 |
| RNF207   | 1.232459 | 0.928662 | 1.63564  | 0.147777 |
| CUL4B    | 0.736033 | 0.480658 | 1.12709  | 0.158635 |
| GPR153   | 0.818406 | 0.698075 | 0.959478 | 0.01352  |
| SLC13A3  | 1.360745 | 0.951817 | 1.94536  | 0.091188 |
| GPRASP2  | 0.895352 | 0.62942  | 1.27364  | 0.538714 |
| RHBDL2   | 0.903156 | 0.573576 | 1.422115 | 0.660129 |
| AUTS2    | 0.711418 | 0.573909 | 0.881875 | 0.00189  |
| SHROOM4  | 1.010765 | 0.847907 | 1.204904 | 0.904917 |
| CDC25C   | 0.851233 | 0.627046 | 1.155572 | 0.301698 |
| MITD1    | 0.823971 | 0.490501 | 1.384151 | 0.464409 |
| EIF5B    | 1.101713 | 0.735764 | 1.649675 | 0.638159 |
| RIBC1    | 1.03272  | 0.573262 | 1.860424 | 0.914625 |
| TSPAN33  | 1.031106 | 0.814428 | 1.305431 | 0.799107 |
| AHCYL2   | 0.761811 | 0.516688 | 1.123225 | 0.169641 |
| B4GALT5  | 0.984542 | 0.708227 | 1.368661 | 0.926149 |
| CD1D     | 1.162645 | 1.033655 | 1.307733 | 0.012017 |
| CD1A     | 1.059706 | 0.817054 | 1.374421 | 0.662047 |
| SPATA2   | 0.895088 | 0.556061 | 1.440816 | 0.648157 |
| CD1C     | 1.080425 | 0.952387 | 1.225677 | 0.229381 |
| CD1E     | 1.086923 | 0.936656 | 1.261298 | 0.272225 |
| HMHB1    | 1.21429  | 0.928421 | 1.588182 | 0.156286 |
| NCF1     | 1.122208 | 0.998608 | 1.261106 | 0.052798 |
| TSR2     | 3.229586 | 1.616258 | 6.453319 | 0.000902 |
| PPP1R9A  | 1.135415 | 0.942599 | 1.367673 | 0.181084 |
| ZC3H18   | 1.105351 | 0.580437 | 2.104968 | 0.760538 |
| ZFAND2B  | 0.943247 | 0.666123 | 1.335662 | 0.742    |
| GDPD5    | 0.970542 | 0.792838 | 1.188076 | 0.771986 |
| DYNC111  | 1.850111 | 1.184274 | 2.890304 | 0.006871 |
| PFKFB1   | 1.19193  | 0.538946 | 2.636068 | 0.664611 |
| ALAS2    | 0.928779 | 0.843465 | 1.022723 | 0.132861 |
| TMED4    | 0.635829 | 0.352022 | 1.148446 | 0.133321 |
| PPP1R15B | 1.003437 | 0.62337  | 1.615228 | 0.98873  |
| COPG2    | 0.788498 | 0.583329 | 1.065831 | 0.122262 |
| ZSCAN12  | 0.610753 | 0.439388 | 0.84895  | 0.00334  |
| TAGLN2   | 1.844002 | 1.372005 | 2.478376 | 4.98E-05 |
| ELK4     | 0.806102 | 0.517095 | 1.256635 | 0.341338 |
| SLC45A3  | 0.816847 | 0.684747 | 0.974431 | 0.024592 |
| DUSP23   | 1.571532 | 1.105984 | 2.233045 | 0.01167  |
| RNF166   | 1.258636 | 0.930991 | 1.701589 | 0.134868 |
| NBL1     | 0.898955 | 0.754733 | 1.070736 | 0.232507 |
| HTR6     | 1.282961 | 0.781276 | 2.106798 | 0.324814 |
| F11R     | 1.070835 | 0.763235 | 1.502403 | 0.692018 |
| USF1     | 1.648468 | 1.05581  | 2.573804 | 0.027887 |
| SPATA2L  | 1.422781 | 1.048606 | 1.930473 | 0.023525 |
| NIT1     | 1.730826 | 0.953479 | 3.141923 | 0.07133  |
| DEDD     | 3.428392 | 1.576949 | 7.45355  | 0.001874 |
| ZNF276   | 1.187517 | 0.782    | 1.803319 | 0.420064 |

|          |          |          |          |          |
|----------|----------|----------|----------|----------|
| NPM2     | 0.960404 | 0.807412 | 1.142386 | 0.648144 |
| FGF17    | 0.959946 | 0.78202  | 1.178355 | 0.695921 |
| CDA      | 1.090789 | 0.984578 | 1.208457 | 0.09639  |
| PINK1    | 1.178827 | 0.772905 | 1.797935 | 0.444932 |
| B4GALT3  | 1.172067 | 0.689926 | 1.991142 | 0.557069 |
| ADAMTS4  | 1.0621   | 0.742906 | 1.518438 | 0.741124 |
| FAM160B2 | 0.993605 | 0.705979 | 1.398414 | 0.970652 |
| NDUFS2   | 2.517679 | 1.336686 | 4.742107 | 0.004259 |
| SLC5A11  | 1.332138 | 0.849285 | 2.089511 | 0.211781 |
| FCER1G   | 1.135719 | 0.994975 | 1.296371 | 0.059384 |
| APOA2    | 1.101526 | 0.930897 | 1.30343  | 0.260133 |
| TOMM40L  | 2.060431 | 1.392606 | 3.048512 | 0.000298 |
| MPZ      | 0.940942 | 0.637527 | 1.388759 | 0.759233 |
| CACHD1   | 1.058408 | 0.886791 | 1.263238 | 0.529415 |
| CDC42SE2 | 0.68782  | 0.445705 | 1.061456 | 0.090925 |
| RAPGEF6  | 0.892377 | 0.572882 | 1.390053 | 0.614583 |
| EPB41    | 0.667119 | 0.452468 | 0.9836   | 0.041009 |
| ALG8     | 0.749202 | 0.411075 | 1.365451 | 0.345753 |
| FBXW5    | 1.507638 | 1.087189 | 2.090688 | 0.013851 |
| SYNJ1    | 1.266082 | 0.809082 | 1.981212 | 0.301761 |
| IFNAR2   | 0.923983 | 0.567151 | 1.505324 | 0.750872 |
| MRPL10   | 1.558393 | 0.86101  | 2.820628 | 0.142756 |
| IFNGR2   | 1.096193 | 0.833852 | 1.44107  | 0.510496 |
| GART     | 0.989375 | 0.642363 | 1.523845 | 0.961339 |
| SON      | 0.991154 | 0.632305 | 1.553659 | 0.969094 |
| DONSON   | 1.193542 | 0.669113 | 2.129004 | 0.549047 |
| SV2A     | 1.102728 | 0.939866 | 1.293812 | 0.2304   |
| STC1     | 0.557314 | 0.140631 | 2.208611 | 0.405331 |
| CSRP1    | 2.357028 | 1.58746  | 3.499666 | 2.12E-05 |
| C1QC     | 1.06132  | 0.955938 | 1.17832  | 0.264677 |
| RCAN1    | 1.375242 | 1.107156 | 1.708242 | 0.003976 |
| UBE2Z    | 1.100931 | 0.562871 | 2.153332 | 0.778767 |
| SNF8     | 0.985034 | 0.488931 | 1.984516 | 0.966345 |
| CCDC24   | 1.177281 | 0.845502 | 1.63925  | 0.333888 |
| RUNX1    | 0.933211 | 0.684082 | 1.273068 | 0.662652 |
| IGF2BP1  | 1.65899  | 0.000867 | 3173.645 | 0.895539 |
| CBR1     | 2.207665 | 1.649349 | 2.954976 | 1.02E-07 |
| CBR3     | 1.070352 | 0.713663 | 1.605314 | 0.742344 |
| MORC3    | 1.047633 | 0.631308 | 1.738509 | 0.857098 |
| CHAF1B   | 1.511768 | 0.993951 | 2.299351 | 0.053408 |
| HLCS     | 1.273485 | 0.765483 | 2.118617 | 0.351904 |
| SCUBE1   | 1.077368 | 0.941314 | 1.233087 | 0.279291 |
| ARHGAP2  | 1.540102 | 1.136608 | 2.086835 | 0.005335 |
| ADPGK    | 1.238797 | 0.725546 | 2.115121 | 0.432721 |
| PTMS     | 1.086946 | 0.931514 | 1.268314 | 0.289643 |
| PADI4    | 1.053465 | 0.904067 | 1.22755  | 0.504459 |
| ADIPOR1  | 1.107136 | 0.672926 | 1.821523 | 0.688683 |
| CYB5R1   | 1.528166 | 1.003617 | 2.326876 | 0.048065 |
| PSMD4    | 2.728462 | 1.427463 | 5.215202 | 0.002392 |
| ATP13A2  | 1.7189   | 1.300581 | 2.271767 | 0.000141 |
| PSMB4    | 2.078865 | 1.13656  | 3.802419 | 0.017527 |
| IRX6     | 0.870029 | 0.515905 | 1.467226 | 0.601557 |
| BTG2     | 1.15073  | 0.917455 | 1.443319 | 0.224506 |
| HK2      | 0.68067  | 0.523078 | 0.885742 | 0.004197 |
| C1R      | 1.217877 | 0.945382 | 1.568916 | 0.127179 |
| ALDH4A1  | 0.933766 | 0.71458  | 1.220185 | 0.615631 |
| STARD9   | 0.939386 | 0.789253 | 1.118076 | 0.48157  |
| THEM4    | 1.185843 | 0.926197 | 1.518276 | 0.176408 |



|          |          |          |          |          |
|----------|----------|----------|----------|----------|
| UBR1     | 0.666549 | 0.428465 | 1.036928 | 0.071998 |
| AMFR     | 1.088859 | 0.64521  | 1.837563 | 0.749849 |
| MED8     | 1.732519 | 1.011076 | 2.968741 | 0.045495 |
| RGL4     | 1.030789 | 0.781218 | 1.360089 | 0.830242 |
| RSPRY1   | 0.711702 | 0.40721  | 1.243878 | 0.232527 |
| CCDC17   | 0.901806 | 0.607413 | 1.338882 | 0.608232 |
| GPBP1L1  | 0.726473 | 0.390081 | 1.352957 | 0.313846 |
| NAE1     | 1.070185 | 0.696543 | 1.644256 | 0.756888 |
| TMEM69   | 1.589478 | 0.831704 | 3.037668 | 0.160821 |
| ACE      | 1.120274 | 0.882895 | 1.421477 | 0.349885 |
| SPON2    | 1.186643 | 0.947999 | 1.485361 | 0.135225 |
| CHCHD6   | 1.092212 | 0.738229 | 1.615932 | 0.65896  |
| CTBP1    | 1.479309 | 0.826798 | 2.646783 | 0.187101 |
| LRRC36   | 1.143077 | 0.72868  | 1.793139 | 0.56049  |
| TPPP3    | 1.107499 | 0.968573 | 1.266353 | 0.135427 |
| ZDHHC1   | 0.889466 | 0.640445 | 1.235311 | 0.484575 |
| ATP6V0D1 | 1.411968 | 1.048615 | 1.901225 | 0.023045 |
| AGRP     | 1.272024 | 0.929628 | 1.740528 | 0.132613 |
| ZFYVE28  | 0.87606  | 0.65929  | 1.164103 | 0.361605 |
| FAM131B  | 1.164446 | 0.86111  | 1.574636 | 0.322766 |
| RGS12    | 0.966336 | 0.725086 | 1.287854 | 0.815237 |
| PSKH1    | 1.075456 | 0.714061 | 1.619757 | 0.72773  |
| ZYX      | 1.258518 | 0.957986 | 1.653331 | 0.098606 |
| ABR      | 1.191617 | 0.936856 | 1.515655 | 0.153153 |
| CCDC117  | 1.042085 | 0.652683 | 1.663808 | 0.862901 |
| ZNF230   | 0.959838 | 0.624113 | 1.476159 | 0.851937 |
| CCDC107  | 1.342247 | 0.828646 | 2.17418  | 0.231643 |
| ZNF222   | 0.696545 | 0.491387 | 0.987359 | 0.042211 |
| NPR2     | 1.188318 | 0.918587 | 1.537251 | 0.189015 |
| ZNF221   | 0.775383 | 0.601959 | 0.99877  | 0.048896 |
| ZNF233   | 0.663947 | 0.469508 | 0.938911 | 0.020531 |
| ZNF235   | 0.566709 | 0.372922 | 0.861196 | 0.007818 |
| GNE      | 0.707661 | 0.377187 | 1.32768  | 0.281435 |
| TNFRSF13 | 1.049647 | 0.793495 | 1.388488 | 0.734264 |
| PTGIR    | 1.045512 | 0.901805 | 1.212118 | 0.555228 |
| CALM3    | 1.344028 | 0.907203 | 1.991189 | 0.14039  |
| DFFA     | 1.468381 | 0.844479 | 2.553223 | 0.17349  |
| CCDC28B  | 1.375899 | 0.856488 | 2.210302 | 0.187026 |
| IQCC     | 1.181015 | 0.688357 | 2.026269 | 0.5458   |
| BSDC1    | 0.852763 | 0.521101 | 1.395515 | 0.52621  |
| ZBTB8A   | 0.902774 | 0.728326 | 1.119006 | 0.350498 |
| ATAD3B   | 1.249307 | 0.870647 | 1.792652 | 0.226996 |
| SSU72    | 1.751469 | 0.826199 | 3.712962 | 0.143755 |
| UBE2J2   | 1.692753 | 0.790215 | 3.626116 | 0.175672 |
| ZNF362   | 1.15112  | 0.71045  | 1.865123 | 0.567612 |
| FNDC5    | 0.736017 | 0.44064  | 1.229397 | 0.241615 |
| CPAMD8   | 1.141389 | 0.885043 | 1.471984 | 0.308203 |
| NR2F6    | 1.10248  | 0.748283 | 1.624334 | 0.621715 |
| ANKLE1   | 1.184801 | 0.910215 | 1.542221 | 0.207448 |
| CCDC58   | 1.03955  | 0.665066 | 1.624896 | 0.864851 |
| KALRN    | 1.161321 | 0.811135 | 1.662691 | 0.41405  |
| CILP2    | 0.823357 | 0.674102 | 1.005658 | 0.056822 |
| ABCG1    | 1.175072 | 0.984163 | 1.403014 | 0.074507 |
| TFF3     | 0.668518 | 0.453488 | 0.985508 | 0.041983 |
| UBASH3A  | 0.997694 | 0.787376 | 1.26419  | 0.98475  |
| RSPH1    | 1.218433 | 0.912022 | 1.627788 | 0.181278 |
| SLC37A1  | 1.27392  | 0.978808 | 1.65801  | 0.071758 |
| PDE9A    | 1.113795 | 0.90336  | 1.373251 | 0.313111 |

|          |          |          |          |          |
|----------|----------|----------|----------|----------|
| WDR4     | 1.205326 | 0.80194  | 1.81162  | 0.369036 |
| NDUFV3   | 1.541365 | 0.819795 | 2.898049 | 0.179229 |
| PKNOX1   | 0.883111 | 0.516337 | 1.510421 | 0.649865 |
| U2AF1    | 0.906457 | 0.719524 | 1.141956 | 0.404587 |
| HSF2BP   | 1.180923 | 0.672641 | 2.073289 | 0.562527 |
| RRP1B    | 1.286456 | 0.854096 | 1.937683 | 0.228084 |
| PDXK     | 1.204183 | 0.895952 | 1.618454 | 0.218078 |
| G6PD     | 1.748508 | 1.330829 | 2.297276 | 6.02E-05 |
| CSTB     | 1.70476  | 1.207676 | 2.406444 | 0.002423 |
| RRP1     | 1.385681 | 0.879519 | 2.183137 | 0.159596 |
| AGPAT3   | 1.552772 | 1.156454 | 2.084909 | 0.003425 |
| TRAPPC10 | 1.067    | 0.679994 | 1.674262 | 0.777844 |
| GAB3     | 1.183721 | 0.841163 | 1.665783 | 0.33323  |
| ICOSLG   | 1.491131 | 0.956755 | 2.323969 | 0.077614 |
| ZNF66    | 0.682581 | 0.531707 | 0.876266 | 0.002732 |
| LRRC3    | 1.209568 | 0.873967 | 1.674038 | 0.251176 |
| ITGB2    | 1.336954 | 1.136102 | 1.573315 | 0.000472 |
| RALGDS   | 1.226502 | 0.801295 | 1.877344 | 0.347209 |
| FTCD     | 0.720566 | 0.504574 | 1.029016 | 0.071446 |
| LSS      | 1.316187 | 0.949757 | 1.823991 | 0.098878 |
| VAV2     | 1.262881 | 1.024379 | 1.556912 | 0.028852 |
| MCM3AP   | 1.130849 | 0.715491 | 1.787331 | 0.59853  |
| PCNT     | 0.925723 | 0.641761 | 1.33533  | 0.679677 |
| DIP2A    | 0.94983  | 0.655037 | 1.377292 | 0.786012 |
| S100B    | 0.917563 | 0.819281 | 1.027635 | 0.136654 |
| PRMT2    | 1.341121 | 0.86549  | 2.078136 | 0.189019 |
| CLDND2   | 1.279554 | 0.968177 | 1.691072 | 0.083157 |
| ADAMTS1  | 0.941244 | 0.660844 | 1.340619 | 0.737204 |
| SLC2A6   | 1.147489 | 0.968241 | 1.359921 | 0.112391 |
| ZNF761   | 0.832258 | 0.570965 | 1.213127 | 0.339555 |
| ZNF714   | 0.939384 | 0.73255  | 1.204617 | 0.622146 |
| GPSM1    | 1.023382 | 0.852684 | 1.228252 | 0.803939 |
| HIPK4    | 1.129954 | 0.726691 | 1.756998 | 0.587496 |
| TOR2A    | 1.512328 | 1.042158 | 2.194615 | 0.029457 |
| ST6GALNA | 1.830456 | 1.183233 | 2.831708 | 0.006612 |
| SHKBP1   | 1.439398 | 1.05772  | 1.958806 | 0.020508 |
| RDH13    | 1.120021 | 0.83622  | 1.500139 | 0.447097 |
| ZER1     | 1.31413  | 0.92357  | 1.86985  | 0.128986 |
| ZDHHC12  | 1.356002 | 0.974266 | 1.887309 | 0.071011 |
| PKN3     | 1.031193 | 0.826179 | 1.287081 | 0.785931 |
| BRSK1    | 0.831244 | 0.64368  | 1.073462 | 0.156589 |
| COX6B2   | 0.622817 | 0.327774 | 1.183442 | 0.148257 |
| TAOK1    | 0.772109 | 0.535046 | 1.114209 | 0.166953 |
| MED27    | 2.849304 | 1.356541 | 5.984733 | 0.005687 |
| DEDD2    | 1.682981 | 1.134048 | 2.497623 | 0.009752 |
| SIK3     | 1.126095 | 0.69137  | 1.834169 | 0.633276 |
| MPZL3    | 1.574865 | 1.185609 | 2.09192  | 0.001717 |
| NEK8     | 1.417081 | 0.952288 | 2.108733 | 0.085632 |
| TLCD1    | 1.121922 | 0.779811 | 1.614122 | 0.535335 |
| PCSK7    | 1.369292 | 0.811435 | 2.310675 | 0.239085 |
| SAFB     | 1.071042 | 0.56255  | 2.039161 | 0.834522 |
| CD3G     | 0.993469 | 0.801296 | 1.231732 | 0.952366 |
| S100A1   | 1.269063 | 0.769275 | 2.093557 | 0.35085  |
| CXCR5    | 1.038068 | 0.355052 | 3.035009 | 0.945583 |
| ZBTB7B   | 1.237337 | 1.007605 | 1.519448 | 0.042127 |
| FLAD1    | 1.614585 | 0.920747 | 2.831271 | 0.094559 |
| SHC1     | 1.439668 | 0.872268 | 2.376154 | 0.154037 |
| VPS11    | 1.369318 | 0.823863 | 2.275903 | 0.22531  |

|          |          |          |          |          |
|----------|----------|----------|----------|----------|
| NLRX1    | 1.191323 | 0.826866 | 1.716423 | 0.347423 |
| ADAR     | 1.415418 | 0.8838   | 2.266813 | 0.148208 |
| IL6R     | 1.389751 | 1.029835 | 1.875452 | 0.031381 |
| UBE2Q1   | 4.057234 | 1.746314 | 9.426225 | 0.001129 |
| CHRN2    | 1.034605 | 0.654435 | 1.635621 | 0.884251 |
| CRTC2    | 1.482494 | 0.965141 | 2.27717  | 0.072187 |
| ANO10    | 1.166047 | 0.812714 | 1.672996 | 0.404252 |
| FDPS     | 1.940412 | 0.927797 | 4.058215 | 0.078257 |
| RUSC1    | 1.72496  | 1.026987 | 2.897298 | 0.03934  |
| FAM189B  | 1.583146 | 1.059742 | 2.365057 | 0.024878 |
| PAQR6    | 1.072669 | 0.851762 | 1.350867 | 0.551017 |
| PMF1     | 1.493428 | 0.817952 | 2.726718 | 0.19164  |
| SLC25A44 | 1.183003 | 0.668952 | 2.092072 | 0.563422 |
| LMNA     | 1.185961 | 1.039723 | 1.352767 | 0.011081 |
| CCR5     | 1.21243  | 1.046659 | 1.404455 | 0.010232 |
| NBEAL2   | 1.219468 | 0.955117 | 1.556983 | 0.111474 |
| CCDC12   | 1.642655 | 0.987422 | 2.732686 | 0.055976 |
| PTH1R    | 1.0086   | 0.742242 | 1.370543 | 0.956351 |
| UBQLN4   | 1.179405 | 0.693763 | 2.005002 | 0.542204 |
| GPATCH4  | 1.364499 | 0.892878 | 2.085232 | 0.150912 |
| FCRL3    | 1.146415 | 0.914561 | 1.437046 | 0.235918 |
| FGFR4    | 1.239932 | 0.743762 | 2.067102 | 0.409535 |
| NACC1    | 1.48994  | 1.002214 | 2.215016 | 0.048736 |
| HK3      | 1.114189 | 1.016702 | 1.221024 | 0.020639 |
| IER2     | 1.043779 | 0.80414  | 1.354832 | 0.747474 |
| ZNF394   | 0.799656 | 0.487004 | 1.313029 | 0.376902 |
| CPSF4    | 0.748035 | 0.454841 | 1.230225 | 0.252753 |
| LY6E     | 1.33695  | 1.08299  | 1.650464 | 0.006899 |
| VPS28    | 1.23895  | 0.851063 | 1.803621 | 0.263449 |
| PTGER1   | 0.823705 | 0.658591 | 1.030214 | 0.089287 |
| RECQL4   | 1.26026  | 0.955872 | 1.661575 | 0.101006 |
| LRR14    | 1.191734 | 0.77826  | 1.824878 | 0.419761 |
| ZNF333   | 0.611469 | 0.36087  | 1.036092 | 0.067522 |
| PPP1R16A | 1.017528 | 0.751369 | 1.37797  | 0.910576 |
| ORAI2    | 0.802986 | 0.567231 | 1.136725 | 0.215971 |
| ALKBH4   | 0.794159 | 0.514584 | 1.225627 | 0.297874 |
| SH2B2    | 1.007539 | 0.781781 | 1.29849  | 0.95373  |
| SQSTM1   | 1.347353 | 0.936005 | 1.939477 | 0.108685 |
| MGAT4B   | 1.511199 | 1.052752 | 2.169287 | 0.025176 |
| RPL8     | 1.532744 | 1.020743 | 2.301562 | 0.039499 |
| MAML1    | 0.846865 | 0.520208 | 1.378641 | 0.503807 |
| LRWD1    | 0.789517 | 0.541392 | 1.151358 | 0.219535 |
| FBXL13   | 0.835999 | 0.592369 | 1.179828 | 0.308144 |
| NAPEPLD  | 0.787338 | 0.534302 | 1.160207 | 0.226763 |
| SCGB3A1  | 0.833713 | 0.595314 | 1.167582 | 0.289899 |
| PSMC2    | 1.17662  | 0.662915 | 2.088403 | 0.578482 |
| USP41    | 0.752422 | 0.603262 | 0.938463 | 0.011624 |
| YDJC     | 1.202132 | 0.85763  | 1.685017 | 0.285277 |
| CCDC116  | 0.804456 | 0.492304 | 1.314532 | 0.385152 |
| DVL3     | 0.758528 | 0.505209 | 1.138866 | 0.182578 |
| AP2M1    | 1.874515 | 1.178018 | 2.982814 | 0.00802  |
| ABCF3    | 1.365559 | 0.777286 | 2.399054 | 0.278516 |
| PCYT1A   | 1.58238  | 0.921814 | 2.716304 | 0.09598  |
| U2AF1L4  | 1.05537  | 0.730117 | 1.525516 | 0.774358 |
| BDH1     | 0.659437 | 0.489239 | 0.888842 | 0.006265 |
| NPHS1    | 7.964304 | 0.508829 | 124.659  | 0.139266 |
| THAP8    | 0.964724 | 0.589194 | 1.579603 | 0.886487 |
| COX7A1   | 0.870867 | 0.625763 | 1.211975 | 0.412265 |

|          |          |          |          |          |
|----------|----------|----------|----------|----------|
| ZNF382   | 0.741701 | 0.563887 | 0.975586 | 0.032621 |
| LRRRC56  | 1.052121 | 0.825701 | 1.340629 | 0.681121 |
| PLXDC1   | 1.108133 | 0.70862  | 1.732889 | 0.652642 |
| PGAP3    | 0.952665 | 0.6569   | 1.381596 | 0.7982   |
| IKZF3    | 1.093867 | 0.872293 | 1.371724 | 0.437231 |
| GRIN2C   | 1.11485  | 0.826627 | 1.503567 | 0.476233 |
| FDXR     | 1.24248  | 0.866135 | 1.782351 | 0.238271 |
| SAP30BP  | 1.41959  | 0.796206 | 2.531049 | 0.235017 |
| ACOX1    | 0.762628 | 0.475559 | 1.222983 | 0.260761 |
| PRPSAP1  | 0.946176 | 0.537748 | 1.664812 | 0.847811 |
| CYGB     | 1.045816 | 0.837667 | 1.305686 | 0.692386 |
| ZNF577   | 0.805874 | 0.59501  | 1.091465 | 0.163171 |
| TMEM143  | 0.925971 | 0.590546 | 1.451915 | 0.737517 |
| KLHL10   | 0.865428 | 0.361106 | 2.074087 | 0.745866 |
| HCRT     | 0.758307 | 0.444148 | 1.294679 | 0.310727 |
| ALDH16A1 | 1.864324 | 1.21614  | 2.857981 | 0.004267 |
| ITGA5    | 0.943315 | 0.699068 | 1.2729   | 0.702694 |
| SIGLEC11 | 1.220126 | 0.964413 | 1.543641 | 0.097319 |
| ZNF385A  | 1.377575 | 1.138158 | 1.667354 | 0.001007 |
| SIGLEC16 | 1.189722 | 0.998249 | 1.417921 | 0.052332 |
| MPP3     | 1.102443 | 0.917262 | 1.325008 | 0.298578 |
| NAGS     | 1.256728 | 0.670668 | 2.354914 | 0.475731 |
| LSM12    | 0.728306 | 0.409532 | 1.29521  | 0.280443 |
| ASB16    | 0.845603 | 0.543879 | 1.314713 | 0.456395 |
| JOXD2    | 1.37918  | 0.970291 | 1.960379 | 0.073154 |
| SHANK1   | 0.814388 | 0.72064  | 0.920332 | 0.001    |
| DBF4B    | 0.831937 | 0.551276 | 1.255486 | 0.380848 |
| PLCD3    | 1.490341 | 1.13443  | 1.957915 | 0.004158 |
| FMNL3    | 1.041148 | 0.810722 | 1.337065 | 0.75205  |
| RACGAP1  | 0.951243 | 0.65995  | 1.371109 | 0.788726 |
| LARP4    | 0.973355 | 0.620425 | 1.527052 | 0.906437 |
| RAVER1   | 1.024721 | 0.744425 | 1.410555 | 0.880942 |
| SYCE2    | 0.721892 | 0.477153 | 1.092162 | 0.122918 |
| SPC24    | 1.086469 | 0.809142 | 1.458849 | 0.581264 |
| LEMD2    | 1.403396 | 0.784781 | 2.509642 | 0.25314  |
| ALOX15   | 0.764333 | 0.490203 | 1.191759 | 0.235672 |
| TREML1   | 1.097456 | 0.924317 | 1.303026 | 0.288432 |
| ZNF653   | 1.081034 | 0.668166 | 1.749018 | 0.750934 |
| MED11    | 1.320506 | 0.816858 | 2.134687 | 0.25659  |
| CXCL16   | 1.153966 | 1.008098 | 1.320939 | 0.037807 |
| BCL6B    | 1.019706 | 0.777741 | 1.336948 | 0.887714 |
| ASGR2    | 1.111    | 0.975953 | 1.264735 | 0.111418 |
| TNFSF13  | 1.570694 | 1.184513 | 2.082782 | 0.001712 |
| SENP3    | 1.563903 | 0.817956 | 2.990126 | 0.17628  |
| EIF4A1   | 0.874364 | 0.632811 | 1.208121 | 0.415724 |
| RPL26    | 0.912282 | 0.599208 | 1.388931 | 0.668597 |
| POLR3K   | 1.80776  | 0.95932  | 3.406575 | 0.067026 |
| SNRNP25  | 1.981602 | 1.338345 | 2.934032 | 0.000637 |
| WDR90    | 1.100664 | 0.815719 | 1.485147 | 0.530355 |
| JMJD8    | 1.24809  | 0.869405 | 1.791719 | 0.22962  |
| CCDC78   | 0.873821 | 0.635709 | 1.201121 | 0.405993 |
| MSLNL    | 0.581198 | 0.341198 | 0.990015 | 0.045837 |
| SPSB3    | 1.447459 | 0.530072 | 3.952551 | 0.470584 |
| CCNF     | 0.902729 | 0.666575 | 1.222548 | 0.508385 |
| TBC1D24  | 0.583353 | 0.375073 | 0.907291 | 0.01677  |
| AMDHD2   | 1.074076 | 0.772032 | 1.494289 | 0.671432 |
| NTN3     | 0.741402 | 0.469246 | 1.171406 | 0.199815 |
| PAQR4    | 1.019294 | 0.740929 | 1.402238 | 0.906521 |

|          |          |          |          |          |
|----------|----------|----------|----------|----------|
| FLYWCH2  | 1.315498 | 0.896404 | 1.930531 | 0.16117  |
| ZNF75A   | 1.114351 | 0.758516 | 1.637116 | 0.581171 |
| ADCY9    | 0.934066 | 0.79259  | 1.100796 | 0.415672 |
| CLPB     | 1.419713 | 0.873811 | 2.30666  | 0.157    |
| NEU3     | 0.814802 | 0.586423 | 1.132121 | 0.222281 |
| ASRGL1   | 1.150884 | 0.946667 | 1.399156 | 0.158528 |
| GNG3     | 1.007832 | 0.67689  | 1.500575 | 0.969358 |
| UBXN1    | 1.545015 | 0.93383  | 2.556216 | 0.090367 |
| TTC9C    | 0.88465  | 0.521803 | 1.49981  | 0.649077 |
| TAF6L    | 1.087969 | 0.694273 | 1.704916 | 0.712968 |
| NXF1     | 1.376237 | 0.832229 | 2.275851 | 0.213362 |
| STX5     | 1.163808 | 0.690123 | 1.96262  | 0.569394 |
| SLC25A45 | 1.339671 | 0.940108 | 1.909055 | 0.10562  |
| RPL29    | 1.219767 | 0.796034 | 1.869055 | 0.361586 |
| ITIH3    | 0.882514 | 0.541192 | 1.439103 | 0.616416 |
| SYVN1    | 1.138458 | 0.760493 | 1.70427  | 0.528733 |
| ZFPL1    | 0.894759 | 0.515812 | 1.552104 | 0.692336 |
| RPS6KA4  | 1.523016 | 1.115012 | 2.080316 | 0.008188 |
| LRP5     | 0.941456 | 0.778678 | 1.138261 | 0.533366 |
| TPCN2    | 0.948036 | 0.613035 | 1.466104 | 0.810409 |
| PDZK1IP1 | 1.034674 | 0.855554 | 1.251295 | 0.725252 |
| TAL1     | 0.994066 | 0.870903 | 1.134646 | 0.929722 |
| CMPK1    | 0.764148 | 0.49434  | 1.181215 | 0.226087 |
| BEND5    | 0.949189 | 0.730819 | 1.232807 | 0.695842 |
| ZYG11B   | 0.953265 | 0.600949 | 1.512132 | 0.838885 |
| MAGOH    | 1.271064 | 0.748498 | 2.158462 | 0.374669 |
| ACOT11   | 0.874841 | 0.71743  | 1.066789 | 0.186449 |
| FAM151A  | 0.772894 | 0.591738 | 1.009511 | 0.058691 |
| PARS2    | 1.072386 | 0.71768  | 1.602401 | 0.733062 |
| USP24    | 0.828341 | 0.547158 | 1.254023 | 0.373402 |
| NOL9     | 1.505171 | 0.77105  | 2.938249 | 0.230865 |
| KLHL21   | 1.021394 | 0.712177 | 1.464869 | 0.9084   |
| ZSWIM5   | 0.905252 | 0.637319 | 1.285827 | 0.578264 |
| GMEB1    | 0.742015 | 0.392187 | 1.403885 | 0.359044 |
| JAK1     | 1.064842 | 0.717915 | 1.57942  | 0.754774 |
| RAVER2   | 0.894704 | 0.687632 | 1.164132 | 0.407435 |
| CTRC     | 1.43025  | 0.807074 | 2.534608 | 0.220286 |
| LZIC     | 1.340628 | 0.785772 | 2.287285 | 0.282168 |
| RBP7     | 0.875171 | 0.711959 | 1.075797 | 0.205453 |
| FBLIM1   | 0.844971 | 0.582222 | 1.226296 | 0.375371 |
| SLC25A34 | 1.406677 | 0.871591 | 2.270265 | 0.162349 |
| AKR7A3   | 1.505403 | 1.012793 | 2.237613 | 0.043091 |
| DHRS3    | 1.022225 | 0.88141  | 1.185537 | 0.771294 |
| MATN1    | 1.078366 | 0.635824 | 1.828924 | 0.779544 |
| LAPTM5   | 1.41897  | 1.084547 | 1.856513 | 0.010716 |
| SDC3     | 1.096399 | 0.918907 | 1.308176 | 0.307072 |
| PEF1     | 3.057159 | 1.782945 | 5.242013 | 4.87E-05 |
| RBBP4    | 0.87355  | 0.536271 | 1.422955 | 0.587095 |
| KIAA1522 | 1.113604 | 0.874577 | 1.417959 | 0.382745 |
| TSSK3    | 0.83364  | 0.518245 | 1.34098  | 0.453119 |
| TMCO4    | 1.707451 | 1.134591 | 2.569551 | 0.010304 |
| UBXN10   | 1.238527 | 0.939442 | 1.632831 | 0.129273 |
| CAMK2N1  | 0.91747  | 0.651556 | 1.29191  | 0.621828 |
| ALPL     | 0.924277 | 0.776981 | 1.099498 | 0.373983 |
| WNT4     | 0.869006 | 0.569681 | 1.325606 | 0.514606 |
| TTLL10   | 0.886089 | 0.703324 | 1.116346 | 0.304831 |
| SCNN1D   | 0.903032 | 0.718857 | 1.134394 | 0.380794 |
| MXRA8    | 1.31359  | 0.956784 | 1.803457 | 0.091648 |

|          |          |          |          |          |
|----------|----------|----------|----------|----------|
| MEGF6    | 0.793838 | 0.657418 | 0.958567 | 0.016403 |
| IL23R    | 0.830452 | 0.423174 | 1.629713 | 0.589126 |
| NFIA     | 1.004721 | 0.83266  | 1.212338 | 0.960802 |
| OMA1     | 0.932382 | 0.616697 | 1.409665 | 0.739916 |
| MYSM1    | 0.672465 | 0.429263 | 1.053456 | 0.08317  |
| TM2D1    | 0.7184   | 0.360391 | 1.432049 | 0.347387 |
| USP1     | 1.247969 | 0.869082 | 1.792036 | 0.230179 |
| FUBP1    | 0.790528 | 0.51237  | 1.219695 | 0.288072 |
| NEXN     | 1.31321  | 1.087689 | 1.585491 | 0.004592 |
| DNAJB4   | 1.187948 | 0.823092 | 1.714537 | 0.357575 |
| TYW3     | 0.998347 | 0.688028 | 1.448629 | 0.993052 |
| B3GALT2  | 0.762604 | 0.525396 | 1.106907 | 0.153966 |
| FAM102B  | 0.936285 | 0.683011 | 1.28348  | 0.682467 |
| GBP2     | 1.200022 | 0.991906 | 1.451803 | 0.060609 |
| ATXN7L2  | 1.068536 | 0.710027 | 1.608066 | 0.750586 |
| GBP4     | 1.08367  | 0.948408 | 1.238223 | 0.237502 |
| ZNF326   | 0.702736 | 0.444635 | 1.110661 | 0.130903 |
| GFI1     | 0.937762 | 0.815181 | 1.078775 | 0.368619 |
| AGL      | 1.003315 | 0.674632 | 1.492135 | 0.98696  |
| VCAM1    | 0.941512 | 0.799684 | 1.108494 | 0.469386 |
| EXTL2    | 0.858175 | 0.621351 | 1.185263 | 0.353232 |
| SLC30A7  | 0.568198 | 0.318984 | 1.012115 | 0.054974 |
| ZNF281   | 0.892461 | 0.553653 | 1.438602 | 0.640464 |
| ARPC5    | 1.31437  | 0.943568 | 1.83089  | 0.105992 |
| NLRP3    | 1.174529 | 0.970131 | 1.421992 | 0.099126 |
| ZNF496   | 0.89962  | 0.673104 | 1.202364 | 0.474759 |
| TRIM58   | 0.941582 | 0.781011 | 1.135165 | 0.528046 |
| SLAMF9   | 0.925026 | 0.714127 | 1.198208 | 0.554987 |
| KCNJ9    | 0.807069 | 0.402502 | 1.618281 | 0.545938 |
| IGSF8    | 1.084927 | 0.781202 | 1.506738 | 0.62666  |
| DDR2     | 0.95166  | 0.67438  | 1.342948 | 0.777974 |
| PEA15    | 1.666503 | 1.220256 | 2.275941 | 0.001319 |
| PEX19    | 1.652462 | 0.80668  | 3.385024 | 0.169816 |
| NCSTN    | 1.263634 | 0.737377 | 2.165476 | 0.394536 |
| VANGL2   | 0.796208 | 0.665901 | 0.952015 | 0.012446 |
| SLAMF6   | 1.029115 | 0.837634 | 1.264369 | 0.784678 |
| OLFML2B  | 0.898386 | 0.763128 | 1.057618 | 0.198061 |
| FCRLB    | 0.907557 | 0.622691 | 1.322741 | 0.613785 |
| FCGR3B   | 0.98131  | 0.849845 | 1.13311  | 0.797104 |
| KLHDC9   | 1.944387 | 1.136953 | 3.325237 | 0.01515  |
| FLVCR1   | 0.90522  | 0.551833 | 1.484912 | 0.693336 |
| ATF3     | 1.097268 | 0.903904 | 1.331997 | 0.347995 |
| RBM15    | 1.084842 | 0.681275 | 1.72747  | 0.731539 |
| DENND2D  | 1.255812 | 0.898987 | 1.754267 | 0.181684 |
| IER5     | 1.631005 | 1.177281 | 2.259594 | 0.003269 |
| SNED1    | 1.071389 | 0.859217 | 1.335955 | 0.540272 |
| BPNT1    | 1.464786 | 0.868743 | 2.469774 | 0.152124 |
| ACP6     | 1.167686 | 0.95681  | 1.425039 | 0.127134 |
| KIF26B   | 0.989716 | 0.821055 | 1.193024 | 0.913645 |
| TFB2M    | 0.886307 | 0.589237 | 1.333148 | 0.562285 |
| KLHDC8A  | 1.185674 | 0.898745 | 1.564207 | 0.22829  |
| PM20D1   | 1.247552 | 0.955243 | 1.629308 | 0.104417 |
| PKDCC    | 1.165032 | 0.832774 | 1.629853 | 0.372553 |
| OXER1    | 0.956826 | 0.759845 | 1.204871 | 0.707464 |
| HAAO     | 1.016611 | 0.785356 | 1.315961 | 0.900437 |
| B3GALNT2 | 1.052448 | 0.682046 | 1.624008 | 0.817334 |
| MAPKAPK  | 1.472669 | 1.076838 | 2.014003 | 0.015374 |
| IL24     | 1.165732 | 0.822889 | 1.651413 | 0.388152 |

|          |          |          |          |          |
|----------|----------|----------|----------|----------|
| PIGR     | 1.454755 | 0.896117 | 2.361645 | 0.12945  |
| CAPN2    | 1.171719 | 0.97374  | 1.40995  | 0.093315 |
| MRPL55   | 1.378736 | 0.98447  | 1.9309   | 0.061639 |
| WDR26    | 0.927985 | 0.558834 | 1.540987 | 0.772706 |
| REL      | 1.137367 | 0.774447 | 1.670358 | 0.511551 |
| PUS10    | 1.016969 | 0.592684 | 1.744989 | 0.951293 |
| PEX13    | 0.775588 | 0.461885 | 1.302353 | 0.336552 |
| KIAA1841 | 0.665521 | 0.447131 | 0.990577 | 0.04479  |
| TRIM17   | 1.086563 | 0.764088 | 1.545135 | 0.643982 |
| RFTN2    | 0.861694 | 0.563787 | 1.317015 | 0.491622 |
| DISC1    | 0.859951 | 0.617068 | 1.198433 | 0.372927 |
| MEMO1    | 0.691106 | 0.455787 | 1.047917 | 0.081931 |
| DPY30    | 1.321513 | 0.667866 | 2.614892 | 0.423339 |
| ARL5A    | 0.817567 | 0.505782 | 1.321549 | 0.411036 |
| DUSP19   | 0.986108 | 0.735038 | 1.322937 | 0.925656 |
| NUP35    | 0.681182 | 0.410106 | 1.131436 | 0.138081 |
| CCDC138  | 0.767787 | 0.535419 | 1.101    | 0.150778 |
| FBXO41   | 1.236595 | 0.847016 | 1.805359 | 0.27135  |
| SMC6     | 1.197116 | 0.735475 | 1.948519 | 0.469157 |
| CCDC74A  | 1.127997 | 0.832959 | 1.527538 | 0.436251 |
| SLC16A14 | 0.917413 | 0.687478 | 1.224254 | 0.55819  |
| SGCB     | 1.135261 | 0.857938 | 1.502228 | 0.374675 |
| NOSTRIN  | 0.891584 | 0.635792 | 1.250286 | 0.505932 |
| SGPP2    | 1.181523 | 0.853301 | 1.635994 | 0.31511  |
| BBS5     | 1.034255 | 0.652197 | 1.640124 | 0.886156 |
| SMARCAD  | 0.625483 | 0.427851 | 0.914403 | 0.015443 |
| HPGDS    | 0.941925 | 0.855905 | 1.03659  | 0.220768 |
| PDLIM5   | 1.37372  | 1.061182 | 1.778307 | 0.015916 |
| RPRD2    | 1.10901  | 0.592384 | 2.076194 | 0.746393 |
| ANKRD23  | 0.958934 | 0.565163 | 1.627062 | 0.876468 |
| CTSS     | 1.123161 | 0.975894 | 1.29265  | 0.1053   |
| MSX1     | 0.775234 | 0.482045 | 1.246745 | 0.293616 |
| PACRGL   | 0.43559  | 0.264079 | 0.718492 | 0.001135 |
| BNIP1    | 0.740456 | 0.412373 | 1.329563 | 0.314337 |
| C1QTNF7  | 0.999197 | 0.624389 | 1.598996 | 0.997329 |
| TNFAIP8L | 1.305381 | 0.976531 | 1.744973 | 0.071925 |
| LYSMD1   | 1.129491 | 0.73917  | 1.725921 | 0.573515 |
| SCNM1    | 4.107207 | 2.056476 | 8.202939 | 6.26E-05 |
| TMOD4    | 0.83288  | 0.572732 | 1.211192 | 0.338511 |
| VPS72    | 1.103474 | 0.620418 | 1.962637 | 0.737516 |
| ERCC3    | 0.897078 | 0.56665  | 1.420187 | 0.643092 |
| RNF149   | 0.977087 | 0.689024 | 1.385582 | 0.896516 |
| IWS1     | 1.015612 | 0.595712 | 1.731486 | 0.954615 |
| BOLA3    | 1.259658 | 0.596071 | 2.661993 | 0.545396 |
| CDC42EP3 | 1.342221 | 1.116425 | 1.613684 | 0.001737 |
| S100A11  | 1.127321 | 0.967418 | 1.313653 | 0.124651 |
| DHX57    | 0.944279 | 0.618924 | 1.440666 | 0.790233 |
| ARHGAP21 | 1.216147 | 0.767227 | 1.927738 | 0.405076 |
| S100A9   | 1.087987 | 1.010794 | 1.171074 | 0.02471  |
| S100A12  | 1.078764 | 1.002245 | 1.161124 | 0.043413 |
| TGFA     | 0.718065 | 0.574933 | 0.896831 | 0.003501 |
| TDRD10   | 1.005414 | 0.618704 | 1.633831 | 0.982611 |
| CCNYL1   | 1.400701 | 0.896865 | 2.18758  | 0.138493 |
| FZD5     | 1.088152 | 0.785147 | 1.508093 | 0.611915 |
| DCAF16   | 0.723852 | 0.463279 | 1.130986 | 0.155796 |
| NPPC     | 0.85251  | 0.310241 | 2.342606 | 0.757017 |
| GNPDA2   | 0.832205 | 0.545831 | 1.268827 | 0.393357 |
| PAQR3    | 0.809801 | 0.516562 | 1.269506 | 0.357736 |

|          |          |          |          |          |
|----------|----------|----------|----------|----------|
| ANTXR2   | 1.125923 | 0.758004 | 1.67242  | 0.556865 |
| HELQ     | 0.630849 | 0.388393 | 1.024659 | 0.062669 |
| MRPS18C  | 0.836522 | 0.40658  | 1.721113 | 0.627732 |
| CGGBP1   | 0.839333 | 0.522966 | 1.347085 | 0.468073 |
| GPR155   | 0.897863 | 0.682897 | 1.180498 | 0.440363 |
| DAPL1    | 1.108927 | 0.876219 | 1.403439 | 0.389582 |
| PMVK     | 1.924275 | 1.195663 | 3.096887 | 0.007018 |
| PBXIP1   | 0.939927 | 0.673787 | 1.311189 | 0.715286 |
| PYGO2    | 1.316854 | 0.806541 | 2.150052 | 0.271155 |
| HIPK1    | 0.546695 | 0.352603 | 0.847627 | 0.006959 |
| LENEP    | 0.982385 | 0.641998 | 1.503244 | 0.934739 |
| DCST2    | 1.382563 | 0.916258 | 2.086181 | 0.122758 |
| DCST1    | 1.350543 | 0.697462 | 2.61515  | 0.37277  |
| COL6A3   | 0.933108 | 0.708953 | 1.228135 | 0.621358 |
| YY1AP1   | 1.180119 | 0.656478 | 2.121441 | 0.579942 |
| KBTBD8   | 1.845328 | 1.388663 | 2.452168 | 2.41E-05 |
| LMOD3    | 2.120728 | 1.041555 | 4.318053 | 0.038248 |
| SLC22A15 | 1.006696 | 0.903239 | 1.122003 | 0.903996 |
| ATP1A1   | 1.261043 | 0.834769 | 1.904992 | 0.270488 |
| SLC15A2  | 1.122636 | 0.809791 | 1.556343 | 0.487631 |
| EIF4E3   | 1.070494 | 0.891152 | 1.285928 | 0.466526 |
| PROK2    | 1.048422 | 0.948809 | 1.158494 | 0.353231 |
| LRRC58   | 1.146739 | 0.802682 | 1.638272 | 0.451865 |
| FSTL1    | 0.899898 | 0.759212 | 1.066653 | 0.223971 |
| ELF3     | 1.120758 | 0.613266 | 2.048211 | 0.71095  |
| TMEM183, | 1.071078 | 0.562286 | 2.040258 | 0.834568 |
| IGFBP7   | 0.87083  | 0.709516 | 1.068819 | 0.185761 |
| TRIM46   | 1.033117 | 0.864638 | 1.234426 | 0.719822 |
| KRTCAP2  | 1.002635 | 0.75248  | 1.335951 | 0.985664 |
| CXCR1    | 1.126746 | 0.9421   | 1.347583 | 0.191277 |
| ARPC2    | 2.248102 | 1.352447 | 3.736904 | 0.001782 |
| CCT3     | 1.520807 | 0.961863 | 2.404557 | 0.072875 |
| TMEM79   | 1.102229 | 0.714672 | 1.699953 | 0.659712 |
| SSR2     | 0.958311 | 0.51368  | 1.787807 | 0.893528 |
| RNF25    | 1.821245 | 1.068921 | 3.103065 | 0.027446 |
| STK36    | 1.100615 | 0.776463 | 1.560093 | 0.590171 |
| NEK10    | 0.800518 | 0.587767 | 1.090278 | 0.158067 |
| CCDC141  | 1.185789 | 0.745203 | 1.886862 | 0.472124 |
| FEV      | 0.430231 | 0.155707 | 1.188764 | 0.103841 |
| EOMES    | 1.106814 | 0.870537 | 1.407221 | 0.407481 |
| CWC22    | 0.955985 | 0.59007  | 1.54881  | 0.854918 |
| AZI2     | 0.610575 | 0.432628 | 0.861714 | 0.005006 |
| TGFBR2   | 0.82537  | 0.590716 | 1.153236 | 0.260772 |
| ANKZF1   | 1.037409 | 0.666772 | 1.614071 | 0.870642 |
| HDAC11   | 1.72103  | 1.192548 | 2.48371  | 0.003722 |
| TRAT1    | 0.808237 | 0.685036 | 0.953595 | 0.011633 |
| FBLN2    | 1.056112 | 0.88921  | 1.254343 | 0.533907 |
| GLB1L    | 1.078436 | 0.819745 | 1.418764 | 0.589467 |
| STT3B    | 0.75855  | 0.554258 | 1.038142 | 0.084321 |
| CHCHD4   | 1.63812  | 1.007811 | 2.66264  | 0.046442 |
| FCRL1    | 0.895161 | 0.73638  | 1.088178 | 0.266261 |
| SERPINI1 | 1.380612 | 1.102928 | 1.728209 | 0.004877 |
| CLASP2   | 0.659717 | 0.402398 | 1.081583 | 0.099139 |
| SUCLG1   | 2.281476 | 1.16469  | 4.469111 | 0.0162   |
| NUAK2    | 1.1755   | 0.950634 | 1.453557 | 0.135536 |
| SPTA1    | 0.930664 | 0.803618 | 1.077796 | 0.337288 |
| PRKCI    | 0.665292 | 0.42638  | 1.038073 | 0.072598 |
| MNDA     | 0.970384 | 0.865677 | 1.087754 | 0.605809 |



|          |          |          |          |          |
|----------|----------|----------|----------|----------|
| PYHIN1   | 1.031442 | 0.8636   | 1.231905 | 0.73262  |
| IFI16    | 1.196815 | 0.90022  | 1.59113  | 0.216268 |
| AIM2     | 1.258052 | 1.053368 | 1.502508 | 0.011282 |
| EFHB     | 1.43848  | 0.788294 | 2.624943 | 0.236101 |
| EIF5A2   | 0.858981 | 0.649269 | 1.13643  | 0.287139 |
| RPL22L1  | 1.099853 | 0.787632 | 1.535841 | 0.576381 |
| PPM1L    | 0.990126 | 0.694235 | 1.41213  | 0.956313 |
| ICA1L    | 0.90032  | 0.595583 | 1.36098  | 0.618437 |
| CTLA4    | 1.266149 | 0.97604  | 1.642487 | 0.075518 |
| ICOS     | 1.0287   | 0.789186 | 1.340906 | 0.834258 |
| RYBP     | 0.696844 | 0.472767 | 1.027126 | 0.068039 |
| PPP4R2   | 0.584666 | 0.353718 | 0.966404 | 0.036328 |
| CD200R1  | 1.194319 | 0.99001  | 1.440792 | 0.063586 |
| GTPBP8   | 1.613115 | 0.94132  | 2.764353 | 0.081873 |
| WDFY3    | 0.81883  | 0.693508 | 0.966799 | 0.018356 |
| COX18    | 0.812813 | 0.403429 | 1.637624 | 0.561992 |
| PTPN13   | 0.693427 | 0.52581  | 0.914477 | 0.009508 |
| THOC7    | 1.384592 | 0.756779 | 2.533229 | 0.291071 |
| ATXN7    | 0.458138 | 0.282148 | 0.743902 | 0.001599 |
| PSMD6    | 0.86629  | 0.498124 | 1.506569 | 0.611183 |
| ADAMTS9  | 0.828059 | 0.53506  | 1.281505 | 0.397125 |
| PPM1K    | 0.892291 | 0.62731  | 1.269201 | 0.526131 |
| GMPS     | 1.071621 | 0.655968 | 1.75065  | 0.782376 |
| TIPARP   | 0.94608  | 0.723347 | 1.237398 | 0.685698 |
| CCNL1    | 0.699099 | 0.496486 | 0.984396 | 0.040362 |
| PTX3     | 1.106572 | 0.922362 | 1.327572 | 0.275695 |
| HESX1    | 1.157613 | 0.902661 | 1.484574 | 0.248861 |
| SLMAP    | 0.731873 | 0.424181 | 1.262757 | 0.262011 |
| RPL9     | 0.798383 | 0.544814 | 1.169969 | 0.248151 |
| RPP14    | 1.204616 | 0.615035 | 2.359378 | 0.58729  |
| ABHD6    | 1.331275 | 1.038994 | 1.705777 | 0.023672 |
| DNASE1L3 | 0.995069 | 0.80176  | 1.234987 | 0.964226 |
| RBM47    | 1.125269 | 1.005075 | 1.259837 | 0.040581 |
| APBB2    | 1.139378 | 0.81314  | 1.596505 | 0.448379 |
| IL17RE   | 0.926378 | 0.831842 | 1.031658 | 0.163786 |
| IL17RC   | 0.983009 | 0.817701 | 1.181735 | 0.855249 |
| CRELD1   | 0.678509 | 0.452561 | 1.017265 | 0.060502 |
| PRRT3    | 1.045616 | 0.80534  | 1.35758  | 0.737743 |
| PCOLCE2  | 1.066011 | 0.870958 | 1.304748 | 0.535273 |
| MTMR14   | 1.717736 | 1.081253 | 2.728887 | 0.021978 |
| TTC14    | 0.85463  | 0.615108 | 1.187423 | 0.349179 |
| CXCL3    | 1.108595 | 0.93516  | 1.314195 | 0.234964 |
| CXCL5    | 1.147034 | 0.828614 | 1.587816 | 0.408337 |
| PPBP     | 1.140156 | 1.040503 | 1.249352 | 0.004942 |
| PF4      | 1.149127 | 1.044805 | 1.263864 | 0.004202 |
| MTHFD2L  | 0.90246  | 0.658433 | 1.236929 | 0.523443 |
| CXCL1    | 1.135921 | 0.973457 | 1.3255   | 0.105586 |
| RCHY1    | 0.689037 | 0.407943 | 1.163819 | 0.16371  |
| CPA3     | 0.891758 | 0.816382 | 0.974094 | 0.011007 |
| GYG1     | 1.407711 | 0.998755 | 1.98412  | 0.050837 |
| HPS3     | 0.612743 | 0.416053 | 0.902419 | 0.013146 |
| TOPBP1   | 0.968882 | 0.626464 | 1.498463 | 0.887009 |
| RYK      | 0.854424 | 0.571842 | 1.276646 | 0.442553 |
| SNRK     | 0.677335 | 0.429246 | 1.068812 | 0.094127 |
| TCF23    | 1.483386 | 1.12185  | 1.961433 | 0.005663 |
| UCN      | 1.082182 | 0.844185 | 1.387276 | 0.533109 |
| ZNF513   | 1.299027 | 0.902428 | 1.869923 | 0.159255 |
| SLC4A1AP | 0.869347 | 0.45794  | 1.650354 | 0.66857  |

|          |          |          |          |          |
|----------|----------|----------|----------|----------|
| PLB1     | 1.221142 | 0.973482 | 1.531808 | 0.084067 |
| SPDYA    | 0.550293 | 0.353668 | 0.856234 | 0.008095 |
| KIAA1143 | 0.931488 | 0.600214 | 1.445602 | 0.751622 |
| KIF15    | 0.849697 | 0.658019 | 1.097211 | 0.21177  |
| TGM4     | 0.58243  | 0.321816 | 1.054096 | 0.074115 |
| WDR43    | 0.930703 | 0.595203 | 1.455316 | 0.752868 |
| ZDHHC3   | 0.791246 | 0.454484 | 1.37754  | 0.407837 |
| CDCP1    | 1.19608  | 1.046344 | 1.367244 | 0.008695 |
| CLEC3B   | 0.966911 | 0.659549 | 1.417509 | 0.863126 |
| LZTFL1   | 0.661921 | 0.450055 | 0.973526 | 0.036057 |
| FYCO1    | 0.754892 | 0.49391  | 1.153775 | 0.193909 |
| CCR1     | 1.144702 | 1.014837 | 1.291185 | 0.02783  |
| LRRC2    | 0.754046 | 0.511219 | 1.112215 | 0.154554 |
| FBXO40   | 1.161737 | 0.697978 | 1.933634 | 0.564128 |
| DTX3L    | 1.236895 | 0.894818 | 1.709745 | 0.198047 |
| ZNF148   | 0.694854 | 0.441607 | 1.093331 | 0.115454 |
| NMNAT3   | 0.907899 | 0.667474 | 1.234927 | 0.538167 |
| ZMYM6    | 0.991869 | 0.588438 | 1.671892 | 0.975552 |
| YEATS2   | 0.822276 | 0.526275 | 1.284761 | 0.390101 |
| ZC3H12A  | 1.144737 | 0.897283 | 1.460435 | 0.276692 |
| MEAF6    | 0.99401  | 0.487732 | 2.025817 | 0.986805 |
| SNIP1    | 0.818097 | 0.456733 | 1.465371 | 0.499606 |
| DNALI1   | 0.804723 | 0.434538 | 1.49027  | 0.489553 |
| POLR2H   | 1.142963 | 0.715487 | 1.825839 | 0.576084 |
| LIPH     | 1.188802 | 0.869765 | 1.624865 | 0.278021 |
| TMEM41A  | 0.934107 | 0.535248 | 1.630191 | 0.810397 |
| RPN1     | 1.113007 | 0.729662 | 1.697751 | 0.619204 |
| SENP2    | 0.784082 | 0.427121 | 1.43937  | 0.432552 |
| HEYL     | 1.181179 | 0.924893 | 1.508482 | 0.182102 |
| IFT122   | 0.806044 | 0.581571 | 1.117159 | 0.195419 |
| RFC4     | 1.540387 | 0.965003 | 2.458844 | 0.070193 |
| RPL39L   | 1.380045 | 1.092681 | 1.742984 | 0.006851 |
| BAP1     | 1.327696 | 0.830694 | 2.122053 | 0.236144 |
| TKT      | 1.136898 | 0.844685 | 1.530201 | 0.397313 |
| PRKCD    | 1.347605 | 1.076685 | 1.686696 | 0.009182 |
| RFT1     | 1.05617  | 0.581403 | 1.918625 | 0.857604 |
| SFMBT1   | 0.812846 | 0.646409 | 1.022137 | 0.076286 |
| GNL3     | 1.004961 | 0.666504 | 1.515291 | 0.981155 |
| PBRM1    | 0.717272 | 0.454345 | 1.132355 | 0.153751 |
| ARHGEF3  | 1.297658 | 0.971446 | 1.733413 | 0.077756 |
| SLBP     | 1.355189 | 0.813498 | 2.25758  | 0.243106 |
| LRPAP1   | 1.227966 | 0.871798 | 1.729644 | 0.240003 |
| ZDHHC19  | 0.874977 | 0.518558 | 1.476371 | 0.616811 |
| UBXN7    | 0.786028 | 0.49393  | 1.250867 | 0.30978  |
| RNF168   | 0.832704 | 0.506469 | 1.369077 | 0.470497 |
| PIGX     | 0.604257 | 0.352354 | 1.03625  | 0.067165 |
| S100P    | 0.928279 | 0.831136 | 1.036776 | 0.18697  |
| CLDN19   | 0.789027 | 0.532214 | 1.169762 | 0.23821  |
| ERMAP    | 1.017299 | 0.701109 | 1.476085 | 0.928046 |
| ZNF691   | 1.214897 | 0.777534 | 1.898276 | 0.392614 |
| SGMS2    | 1.199341 | 1.04719  | 1.3736   | 0.008636 |
| METAP1   | 0.814731 | 0.481618 | 1.378244 | 0.444923 |
| DNAJB14  | 0.585217 | 0.36715  | 0.932804 | 0.024297 |
| EMCN     | 1.070591 | 0.752836 | 1.522463 | 0.704187 |
| BDH2     | 0.950166 | 0.614136 | 1.470058 | 0.818424 |
| PGRMC2   | 0.968259 | 0.574251 | 1.632606 | 0.903683 |
| CDC25A   | 1.0651   | 0.786658 | 1.442098 | 0.683331 |
| CAMP     | 0.968742 | 0.839462 | 1.117931 | 0.66389  |

|          |          |          |          |          |
|----------|----------|----------|----------|----------|
| ZNF589   | 0.968827 | 0.660184 | 1.421765 | 0.871446 |
| PLXNB1   | 0.702537 | 0.585837 | 0.842483 | 0.000139 |
| CCDC51   | 1.777143 | 1.064837 | 2.965933 | 0.027781 |
| ATRIP    | 1.477962 | 0.769036 | 2.8404   | 0.241171 |
| SHISA5   | 1.952046 | 1.270119 | 3.0001   | 0.002285 |
| SPRY1    | 1.061162 | 0.931631 | 1.208703 | 0.371451 |
| APEH     | 1.994896 | 1.206379 | 3.298806 | 0.007122 |
| INTU     | 1.035868 | 0.833381 | 1.287554 | 0.750826 |
| RNF123   | 0.958533 | 0.659317 | 1.39354  | 0.824448 |
| HSPA4L   | 0.765431 | 0.593939 | 0.986439 | 0.03888  |
| MFSD8    | 0.50446  | 0.310648 | 0.81919  | 0.005671 |
| CAMKV    | 1.320988 | 0.993098 | 1.757137 | 0.055827 |
| MON1A    | 2.138867 | 1.240905 | 3.686625 | 0.0062   |
| MST1R    | 1.230402 | 0.986313 | 1.534897 | 0.066091 |
| RAD54L2  | 0.91263  | 0.537809 | 1.54868  | 0.73473  |
| TEX264   | 1.695494 | 0.979628 | 2.934478 | 0.059238 |
| GRM2     | 1.305748 | 0.777222 | 2.193682 | 0.313532 |
| DUSP7    | 2.030179 | 1.468525 | 2.806644 | 1.82E-05 |
| PPM1M    | 1.368886 | 1.079332 | 1.736119 | 0.00961  |
| WDR82    | 1.682642 | 0.90445  | 3.130393 | 0.100405 |
| NDST3    | 0.654065 | 0.523671 | 0.816928 | 0.000182 |
| HMGB2    | 0.894754 | 0.635178 | 1.260411 | 0.524702 |
| SAP30    | 0.8763   | 0.681719 | 1.126419 | 0.302665 |
| SCRG1    | 0.681703 | 0.479324 | 0.969531 | 0.032995 |
| MAD2L1   | 0.99431  | 0.720065 | 1.373006 | 0.972355 |
| ANXA5    | 1.137479 | 1.011062 | 1.279703 | 0.032115 |
| MAP9     | 1.293173 | 0.955651 | 1.749903 | 0.09571  |
| FBXO8    | 0.987605 | 0.608867 | 1.601935 | 0.959693 |
| HPGD     | 0.982953 | 0.851482 | 1.134724 | 0.814441 |
| TMEM144  | 1.317126 | 1.06318  | 1.631727 | 0.011716 |
| IL15     | 1.144283 | 0.955672 | 1.370119 | 0.142488 |
| FAM160A1 | 1.034017 | 0.625717 | 1.708743 | 0.896153 |
| ARFIP1   | 1.103774 | 0.747599 | 1.629639 | 0.619417 |
| HHIP     | 0.570058 | 0.36268  | 0.896013 | 0.014857 |
| ANAPC10  | 0.682415 | 0.365428 | 1.27437  | 0.23048  |
| ABCE1    | 0.975376 | 0.67048  | 1.418922 | 0.896276 |
| OTUD4    | 0.913758 | 0.562757 | 1.483685 | 0.71535  |
| LSM6     | 1.002147 | 0.581086 | 1.728315 | 0.993845 |
| TMEM184A | 0.961973 | 0.635704 | 1.455696 | 0.854461 |
| ITGA2    | 1.084953 | 0.880235 | 1.337282 | 0.444713 |
| MOCS2    | 1.026675 | 0.73273  | 1.43854  | 0.878424 |
| EDIL3    | 0.975874 | 0.810503 | 1.174987 | 0.796572 |
| TMEM161A | 0.635939 | 0.40104  | 1.008422 | 0.054316 |
| ELOVL7   | 1.131627 | 0.960933 | 1.332642 | 0.138268 |
| NDUFAF2  | 1.341826 | 0.74357  | 2.421422 | 0.328951 |
| LMBRD2   | 0.794995 | 0.520922 | 1.213265 | 0.287474 |
| NIPBL    | 0.727339 | 0.479798 | 1.102595 | 0.133654 |
| SLC25A46 | 0.70398  | 0.4621   | 1.072469 | 0.102211 |
| STARD4   | 1.256383 | 1.014646 | 1.555712 | 0.03632  |
| PGGT1B   | 0.819967 | 0.536402 | 1.253437 | 0.359293 |
| F2RL2    | 0.853468 | 0.64082  | 1.13668  | 0.278486 |
| CCDC112  | 0.858523 | 0.685683 | 1.07493  | 0.183524 |
| CMBL     | 0.951249 | 0.770962 | 1.173695 | 0.641099 |
| PRRC1    | 0.562196 | 0.375173 | 0.842451 | 0.005259 |
| F2RL1    | 1.013742 | 0.891819 | 1.152332 | 0.834641 |
| AGGF1    | 0.961539 | 0.612845 | 1.50863  | 0.864488 |
| WDR41    | 0.916418 | 0.596944 | 1.406868 | 0.689823 |
| NDUFS4   | 0.885853 | 0.532597 | 1.473413 | 0.640566 |

|          |          |          |          |          |
|----------|----------|----------|----------|----------|
| SPINK1   | 0.839438 | 0.257519 | 2.736321 | 0.771581 |
| GRPEL2   | 1.037657 | 0.725917 | 1.483272 | 0.839307 |
| ARSK     | 0.721418 | 0.472809 | 1.100748 | 0.129849 |
| RHOBTB3  | 0.743894 | 0.635734 | 0.870456 | 0.000224 |
| TIGD6    | 1.409218 | 0.770521 | 2.57734  | 0.26543  |
| SERINC5  | 0.605265 | 0.484578 | 0.756009 | 9.64E-06 |
| CAGE1    | 0.860437 | 0.28778  | 2.572637 | 0.787937 |
| CASP3    | 0.717087 | 0.522531 | 0.984085 | 0.039464 |
| ERAP1    | 0.765625 | 0.551547 | 1.062796 | 0.110489 |
| ERAP2    | 0.871029 | 0.707701 | 1.072051 | 0.192479 |
| CMYA5    | 1.297225 | 0.359113 | 4.685965 | 0.691281 |
| RICTOR   | 0.636979 | 0.426591 | 0.951126 | 0.027458 |
| EBF1     | 1.089027 | 0.893883 | 1.326772 | 0.397273 |
| ANKRA2   | 0.564546 | 0.333189 | 0.956553 | 0.033581 |
| UBLCP1   | 1.567652 | 1.011398 | 2.429836 | 0.044362 |
| UTP15    | 0.692558 | 0.427021 | 1.123216 | 0.136488 |
| TLR3     | 0.929011 | 0.687246 | 1.255825 | 0.632084 |
| NSA2     | 0.857712 | 0.55429  | 1.32723  | 0.490789 |
| GFM2     | 0.641351 | 0.408567 | 1.006765 | 0.053525 |
| TERT     | 1.129376 | 0.877031 | 1.454329 | 0.34569  |
| CCDC127  | 1.342995 | 0.826859 | 2.181309 | 0.233383 |
| ACSL6    | 0.573084 | 0.359571 | 0.913381 | 0.019236 |
| IL3      | 1.249473 | 0.593999 | 2.62826  | 0.557173 |
| CSF2     | 2.605527 | 0.336528 | 20.17297 | 0.359117 |
| SHROOM1  | 0.90639  | 0.693954 | 1.183857 | 0.470717 |
| GDF9     | 0.584105 | 0.324758 | 1.05056  | 0.07261  |
| UQCRQ    | 1.226437 | 0.743286 | 2.023644 | 0.424377 |
| LEAP2    | 0.652221 | 0.40138  | 1.059826 | 0.084458 |
| GJB7     | 0.675775 | 0.391368 | 1.166863 | 0.159657 |
| SLC35A1  | 1.210388 | 0.732008 | 2.001397 | 0.456785 |
| TXLNB    | 1.196571 | 0.923701 | 1.550051 | 0.17416  |
| CITED2   | 0.695439 | 0.535141 | 0.903754 | 0.006588 |
| DCBLD1   | 1.08511  | 0.866721 | 1.358525 | 0.476211 |
| SFXN1    | 1.399791 | 1.046137 | 1.872999 | 0.023603 |
| SAMD3    | 1.072169 | 0.818928 | 1.40372  | 0.612232 |
| PDSS2    | 0.849349 | 0.462662 | 1.559221 | 0.598312 |
| STXBP5   | 0.642938 | 0.491779 | 0.840558 | 0.001237 |
| IL31RA   | 1.231067 | 0.991177 | 1.529017 | 0.060132 |
| ANKRD55  | 1.547305 | 1.16469  | 2.055614 | 0.002596 |
| PI16     | 1.583274 | 1.142036 | 2.194989 | 0.005837 |
| DAGLB    | 0.676802 | 0.459995 | 0.995796 | 0.047552 |
| KIAA0895 | 0.686032 | 0.516976 | 0.910372 | 0.009042 |
| STK17A   | 0.740817 | 0.479013 | 1.145711 | 0.17749  |
| TRA2A    | 0.593909 | 0.34264  | 1.029441 | 0.063372 |
| GALNT10  | 1.201438 | 0.795705 | 1.814056 | 0.382696 |
| SAP30L   | 0.613511 | 0.403239 | 0.93343  | 0.022507 |
| RPS14    | 0.972342 | 0.663537 | 1.424864 | 0.885613 |
| MYOZ3    | 0.793083 | 0.61767  | 1.018311 | 0.069111 |
| COG5     | 0.705647 | 0.454115 | 1.096501 | 0.121067 |
| GPR85    | 0.826647 | 0.616575 | 1.108291 | 0.203146 |
| SLU7     | 1.110512 | 0.651373 | 1.893288 | 0.700167 |
| RP9      | 1.053136 | 0.615619 | 1.801594 | 0.850096 |
| PTTG1    | 0.901838 | 0.636963 | 1.276858 | 0.560315 |
| CAMLG    | 0.719212 | 0.469258 | 1.102306 | 0.130312 |
| RELL2    | 1.427601 | 1.118602 | 1.821955 | 0.004229 |
| KCNK5    | 1.064454 | 0.906705 | 1.249648 | 0.445326 |
| ZNF12    | 0.629484 | 0.412969 | 0.959516 | 0.031388 |
| SLC29A4  | 0.442102 | 0.292186 | 0.668938 | 0.000112 |

|          |          |          |          |          |
|----------|----------|----------|----------|----------|
| CDCA7L   | 0.802694 | 0.63257  | 1.018573 | 0.070524 |
| SP8      | 1104.438 | 0.070986 | 17183457 | 0.154786 |
| MIOS     | 1.016199 | 0.635115 | 1.625943 | 0.946574 |
| USP49    | 0.82228  | 0.538334 | 1.255993 | 0.36527  |
| SYTL3    | 1.142231 | 0.930032 | 1.402845 | 0.204721 |
| ZNF704   | 0.962588 | 0.792303 | 1.169471 | 0.701072 |
| FABP5    | 1.308926 | 0.997017 | 1.718413 | 0.052568 |
| TAGAP    | 1.384467 | 0.973006 | 1.969924 | 0.070624 |
| COL1A2   | 0.895754 | 0.734961 | 1.091726 | 0.275457 |
| SLC13A4  | 0.715866 | 0.511187 | 1.002498 | 0.051722 |
| BRI3     | 0.977516 | 0.721688 | 1.324031 | 0.883214 |
| LMTK2    | 0.62738  | 0.442772 | 0.888959 | 0.008743 |
| CTSB     | 1.184473 | 0.951707 | 1.474167 | 0.129377 |
| DLC1     | 0.920361 | 0.78317  | 1.081584 | 0.313606 |
| ADCY1    | 1.015835 | 0.658029 | 1.5682   | 0.943466 |
| RAD21    | 0.872756 | 0.570366 | 1.335462 | 0.530599 |
| MED30    | 0.783529 | 0.491555 | 1.248933 | 0.305126 |
| PHKG1    | 0.663218 | 0.416538 | 1.055985 | 0.083556 |
| DEFA4    | 1.006459 | 0.908059 | 1.115523 | 0.90238  |
| OSGIN2   | 0.907654 | 0.566462 | 1.454355 | 0.687091 |
| DEFB1    | 0.942088 | 0.857221 | 1.035357 | 0.215507 |
| OXR1     | 1.203459 | 0.815374 | 1.776258 | 0.351137 |
| GPR146   | 1.092735 | 0.759431 | 1.572322 | 0.63287  |
| UNCX     | 0.758625 | 0.626151 | 0.919126 | 0.004784 |
| TMEM184  | 0.971082 | 0.710765 | 1.326739 | 0.853777 |
| NOS3     | 1.655647 | 1.091951 | 2.510338 | 0.017588 |
| MICALL2  | 0.85691  | 0.730795 | 1.004788 | 0.057282 |
| CA3      | 1.279227 | 1.01841  | 1.606839 | 0.034279 |
| INTS1    | 1.209177 | 0.880663 | 1.660236 | 0.240276 |
| CDK5     | 1.698103 | 1.13537  | 2.539746 | 0.009934 |
| SLC4A2   | 1.13953  | 0.793194 | 1.637089 | 0.479816 |
| FASTK    | 1.044262 | 0.719897 | 1.514779 | 0.819477 |
| TMUB1    | 1.452042 | 1.031977 | 2.043093 | 0.032305 |
| PHAX     | 0.792986 | 0.536475 | 1.172146 | 0.244696 |
| ALDH7A1  | 0.690922 | 0.505097 | 0.945111 | 0.020714 |
| FOXK1    | 0.746973 | 0.441718 | 1.26318  | 0.276441 |
| COX6C    | 1.387629 | 0.81448  | 2.364103 | 0.228166 |
| OSR2     | 1.208046 | 0.675771 | 2.159571 | 0.523671 |
| YWHAZ    | 1.429381 | 0.810566 | 2.520621 | 0.217086 |
| BAALC    | 0.999162 | 0.907874 | 1.099629 | 0.986316 |
| FZD6     | 1.109821 | 0.969196 | 1.27085  | 0.131721 |
| CTHRC1   | 0.913411 | 0.713022 | 1.170118 | 0.473548 |
| SLC25A32 | 0.791671 | 0.445231 | 1.407682 | 0.42631  |
| TP53INP1 | 0.854138 | 0.649579 | 1.123114 | 0.259007 |
| INTS8    | 0.801892 | 0.502567 | 1.279495 | 0.354387 |
| FREM1    | 0.910528 | 0.725332 | 1.143009 | 0.419156 |
| GEM      | 0.951565 | 0.512015 | 1.768456 | 0.875237 |
| TMEM67   | 0.848452 | 0.649497 | 1.108352 | 0.228046 |
| SNAPC3   | 0.783865 | 0.51721  | 1.187998 | 0.251006 |
| NUDT2    | 1.069867 | 0.641914 | 1.78313  | 0.795547 |
| TMEM65   | 1.023082 | 0.815328 | 1.283774 | 0.843794 |
| PSIP1    | 0.974549 | 0.60291  | 1.575269 | 0.916199 |
| UBAP1    | 1.348417 | 0.71237  | 2.552363 | 0.358513 |
| SYK      | 1.51535  | 1.086482 | 2.113505 | 0.014341 |
| NIPSNAP3 | 1.039461 | 0.803761 | 1.344278 | 0.768011 |
| ABCA1    | 0.813615 | 0.675384 | 0.980138 | 0.029921 |
| NFIL3    | 1.005234 | 0.827139 | 1.221675 | 0.958157 |
| LETM2    | 0.586907 | 0.378618 | 0.909781 | 0.017184 |

|          |          |          |          |          |
|----------|----------|----------|----------|----------|
| METTL2B  | 0.589607 | 0.353809 | 0.982554 | 0.04261  |
| FXN      | 1.006434 | 0.669405 | 1.513149 | 0.975408 |
| TMEM71   | 1.193605 | 0.890612 | 1.599678 | 0.236189 |
| MAMDC2   | 0.962379 | 0.856673 | 1.081128 | 0.518302 |
| CPA6     | 0.877805 | 0.725491 | 1.062097 | 0.180124 |
| ALDH1A1  | 1.091407 | 0.982222 | 1.212728 | 0.103861 |
| KDM1B    | 1.332814 | 0.932831 | 1.904305 | 0.114556 |
| HGSNAT   | 0.821831 | 0.566872 | 1.19146  | 0.300434 |
| GKAP1    | 0.728702 | 0.52994  | 1.002013 | 0.051464 |
| KIF27    | 0.769311 | 0.492167 | 1.202517 | 0.249829 |
| HNRNPK   | 0.884299 | 0.553507 | 1.41278  | 0.606985 |
| TRPV6    | 0.866566 | 0.549109 | 1.367556 | 0.538395 |
| ANKS6    | 1.128748 | 0.919157 | 1.386131 | 0.247842 |
| FBP1     | 1.083898 | 0.954305 | 1.231089 | 0.214957 |
| ZHX1     | 1.113255 | 0.724008 | 1.711773 | 0.625016 |
| CYBB     | 1.019982 | 0.921785 | 1.128639 | 0.701669 |
| DYNLT3   | 1.068636 | 0.775084 | 1.473366 | 0.685395 |
| MID1IP1  | 0.959622 | 0.696427 | 1.322284 | 0.801049 |
| NCF1C    | 1.142582 | 1.01356  | 1.288028 | 0.029237 |
| KIAA1958 | 0.674877 | 0.551067 | 0.826504 | 0.000143 |
| PCDH19   | 0.001447 | 5.89E-07 | 3.55241  | 0.100654 |
| PIGA     | 0.633325 | 0.404645 | 0.99124  | 0.045667 |
| OR1K1    | 0.601798 | 0.318203 | 1.138143 | 0.118296 |
| STRBP    | 0.946733 | 0.705504 | 1.270444 | 0.715274 |
| CLDN3    | 1.507259 | 0.932382 | 2.436587 | 0.094078 |
| GAPVD1   | 0.797164 | 0.49037  | 1.295898 | 0.360498 |
| ATP7A    | 0.834141 | 0.59177  | 1.175778 | 0.300468 |
| ZNF367   | 1.051172 | 0.756136 | 1.461328 | 0.766535 |
| HDX      | 0.954051 | 0.669003 | 1.360552 | 0.795055 |
| NDUFB6   | 1.321134 | 0.77943  | 2.239321 | 0.300953 |
| NOL6     | 1.240066 | 0.81028  | 1.897818 | 0.32168  |
| AQP3     | 0.981978 | 0.823161 | 1.171438 | 0.839882 |
| VCP      | 1.702793 | 1.005216 | 2.884458 | 0.047781 |
| PIGO     | 0.855746 | 0.508357 | 1.440524 | 0.557689 |
| STOML2   | 1.946918 | 1.185479 | 3.19743  | 0.008484 |
| BRWD3    | 0.689118 | 0.453887 | 1.04626  | 0.080516 |
| SLITRK5  | 1.092413 | 0.931447 | 1.281195 | 0.277131 |
| MELK     | 1.161603 | 0.861845 | 1.565619 | 0.325281 |
| OTUD1    | 1.133498 | 0.892619 | 1.439379 | 0.303937 |
| ARHGAP11 | 0.929175 | 0.718898 | 1.200957 | 0.574701 |
| HECTD2   | 0.918015 | 0.685462 | 1.229465 | 0.566011 |
| SLC7A3   | 0.762101 | 0.452832 | 1.282591 | 0.306358 |
| FBXO33   | 1.299923 | 0.676926 | 2.496284 | 0.43075  |
| LRRRC18  | 0.88271  | 0.685607 | 1.136476 | 0.333207 |
| WRN      | 0.622579 | 0.431347 | 0.898591 | 0.011371 |
| TSHR     | 0.716945 | 0.501829 | 1.024274 | 0.067521 |
| CFL2     | 0.784301 | 0.494451 | 1.244064 | 0.301982 |
| SUGT1    | 0.637111 | 0.378154 | 1.073398 | 0.090297 |
| GTF2A1   | 1.116904 | 0.722358 | 1.726945 | 0.61902  |
| ZCCHC24  | 1.107241 | 0.875103 | 1.400959 | 0.396101 |
| PGM2L1   | 1.040948 | 0.737252 | 1.469745 | 0.819631 |
| SLC16A9  | 0.941114 | 0.810224 | 1.09315  | 0.427014 |
| FOLR2    | 1.198925 | 1.005054 | 1.430193 | 0.043802 |
| INPPL1   | 1.31494  | 0.890455 | 1.941779 | 0.168634 |
| PHOX2A   | 1.091654 | 0.366815 | 3.248799 | 0.874773 |
| GJB2     | 0.824488 | 0.535348 | 1.26979  | 0.381077 |
| CRYL1    | 1.302812 | 0.893668 | 1.899272 | 0.169    |
| REEP3    | 1.198288 | 0.915196 | 1.568947 | 0.188336 |

|          |          |          |          |          |
|----------|----------|----------|----------|----------|
| PCF11    | 0.728732 | 0.391235 | 1.357371 | 0.318689 |
| RPL10L   | 1.060623 | 0.560541 | 2.006848 | 0.856452 |
| RPL36AL  | 1.169094 | 0.651559 | 2.09771  | 0.60044  |
| ZNF22    | 0.979718 | 0.672361 | 1.427576 | 0.915044 |
| KLHDC2   | 0.694048 | 0.367599 | 1.3104   | 0.260044 |
| RPUSD4   | 0.84869  | 0.538237 | 1.33821  | 0.480126 |
| ARF6     | 2.169602 | 1.336244 | 3.52269  | 0.001736 |
| TTC8     | 0.915103 | 0.70582  | 1.186441 | 0.5031   |
| TMEM63C  | 1.389552 | 1.100952 | 1.753804 | 0.005612 |
| AKR1E2   | 1.052681 | 0.865795 | 1.279907 | 0.606665 |
| KBTBD6   | 1.185578 | 0.793877 | 1.770545 | 0.405457 |
| FAAH2    | 0.808784 | 0.552537 | 1.183867 | 0.274963 |
| NUDT5    | 1.30725  | 0.899457 | 1.899927 | 0.160172 |
| DACT1    | 1.060342 | 0.764443 | 1.470778 | 0.72561  |
| PRPF18   | 0.862716 | 0.456435 | 1.630635 | 0.649384 |
| TAF3     | 1.662861 | 0.816729 | 3.385587 | 0.160951 |
| VDAC2    | 1.494982 | 0.808449 | 2.764519 | 0.199833 |
| COMTD1   | 1.773309 | 1.351832 | 2.326194 | 3.52E-05 |
| SLC18A2  | 0.929136 | 0.778315 | 1.109184 | 0.416039 |
| PDZD8    | 0.826212 | 0.6664   | 1.024351 | 0.081754 |
| ZNF503   | 1.194943 | 1.01359  | 1.408743 | 0.033947 |
| QSOX2    | 0.710512 | 0.511223 | 0.987489 | 0.041859 |
| NSD1     | 0.97439  | 0.623994 | 1.521548 | 0.909164 |
| PRDX3    | 1.2253   | 0.810315 | 1.852811 | 0.335524 |
| ENOX2    | 1.347522 | 0.898113 | 2.021812 | 0.149626 |
| GHITM    | 2.042167 | 1.172178 | 3.55786  | 0.011708 |
| CLEC1B   | 1.074368 | 0.875509 | 1.318395 | 0.492157 |
| SNAPC4   | 1.082557 | 0.729278 | 1.606972 | 0.693888 |
| PMPCA    | 1.213255 | 0.786431 | 1.871734 | 0.382187 |
| TSC1     | 0.851493 | 0.560949 | 1.292526 | 0.450273 |
| GFI1B    | 1.048195 | 0.909751 | 1.207708 | 0.514872 |
| HPRT1    | 1.260183 | 0.837588 | 1.895993 | 0.267172 |
| ZMYND19  | 1.721824 | 1.040904 | 2.848174 | 0.034338 |
| STOX1    | 1.060984 | 0.78504  | 1.433924 | 0.700102 |
| RET      | 1.029659 | 0.819195 | 1.294195 | 0.802179 |
| DDX21    | 1.059953 | 0.752743 | 1.492542 | 0.73881  |
| BMS1     | 0.864115 | 0.527314 | 1.416035 | 0.56221  |
| STK32C   | 1.64082  | 1.219861 | 2.207046 | 0.001061 |
| FUNDC2   | 1.670026 | 0.819352 | 3.403891 | 0.158079 |
| NDRG2    | 1.258168 | 1.007721 | 1.570858 | 0.042573 |
| ZNF219   | 0.779531 | 0.620989 | 0.97855  | 0.031803 |
| CASP7    | 1.172446 | 0.760052 | 1.808599 | 0.471919 |
| METTL3   | 0.970483 | 0.6305   | 1.493795 | 0.891696 |
| SALL2    | 0.978454 | 0.766663 | 1.248753 | 0.861066 |
| PRAP1    | 0.955101 | 0.636731 | 1.432658 | 0.824269 |
| TRUB1    | 0.838994 | 0.5783   | 1.217207 | 0.355145 |
| ZFYVE1   | 0.879013 | 0.522899 | 1.477652 | 0.626536 |
| FRAT1    | 1.254564 | 0.956211 | 1.646009 | 0.101673 |
| UBTD1    | 1.124573 | 0.905365 | 1.396856 | 0.288563 |
| E2F7     | 1.103649 | 0.853273 | 1.427492 | 0.452502 |
| ISCA2    | 1.33025  | 0.732806 | 2.414778 | 0.348214 |
| PACSIN3  | 0.783731 | 0.569952 | 1.077694 | 0.133734 |
| TTC7B    | 0.944411 | 0.686537 | 1.299147 | 0.725206 |
| SLC39A13 | 1.047716 | 0.761181 | 1.442113 | 0.774918 |
| PSMC3    | 2.032503 | 1.198433 | 3.44706  | 0.008499 |
| RAPSN    | 1.070719 | 0.792071 | 1.447395 | 0.65683  |
| AGBL2    | 0.93682  | 0.626255 | 1.401396 | 0.750774 |
| TC2N     | 1.00699  | 0.842015 | 1.204289 | 0.939175 |

|         |          |          |          |          |
|---------|----------|----------|----------|----------|
| CPSF2   | 1.023981 | 0.664233 | 1.57857  | 0.91454  |
| MOAP1   | 1.167198 | 0.776691 | 1.754043 | 0.45691  |
| IFI27L1 | 1.584123 | 0.965944 | 2.597919 | 0.068352 |
| IFI27   | 1.143862 | 0.936063 | 1.397791 | 0.188839 |
| CLMN    | 0.828403 | 0.665049 | 1.031882 | 0.092976 |
| PDZRN4  | 1.15882  | 0.947485 | 1.417293 | 0.151329 |
| CCDC38  | 0.799184 | 0.336402 | 1.898605 | 0.611624 |
| PTER    | 1.180603 | 0.809699 | 1.721409 | 0.38821  |
| C1QL3   | 1.086851 | 0.780962 | 1.512551 | 0.621389 |
| CACNB2  | 1.061528 | 0.742991 | 1.51663  | 0.742902 |
| ARL5B   | 0.633793 | 0.464056 | 0.865614 | 0.004139 |
| TAF1D   | 1.036525 | 0.659681 | 1.628642 | 0.876348 |
| ABTB2   | 0.962128 | 0.776384 | 1.19231  | 0.724261 |
| AMOTL1  | 1.040466 | 0.881357 | 1.228299 | 0.639442 |
| HTRA1   | 1.043801 | 0.776987 | 1.40224  | 0.77593  |
| LIPC    | 1.430052 | 1.061761 | 1.926091 | 0.018552 |
| CEP57   | 0.723692 | 0.474308 | 1.104198 | 0.133572 |
| TCP11L2 | 1.01247  | 0.743155 | 1.379384 | 0.937393 |
| SPRED1  | 1.081082 | 0.909104 | 1.285592 | 0.377809 |
| GPR176  | 1.116533 | 0.728529 | 1.711183 | 0.612849 |
| JAM3    | 0.945067 | 0.760999 | 1.173657 | 0.609216 |
| CMTM5   | 1.192459 | 1.012168 | 1.404866 | 0.035329 |
| ADAMTS1 | 0.607611 | 0.431821 | 0.854965 | 0.004247 |
| GPT2    | 0.855172 | 0.7211   | 1.014172 | 0.072143 |
| AMN     | 0.859864 | 0.712588 | 1.037579 | 0.115231 |
| RAB8B   | 1.04422  | 0.712966 | 1.52938  | 0.82412  |
| IKBIP   | 0.999133 | 0.680929 | 1.466038 | 0.996464 |
| RPUSD2  | 1.803514 | 1.068012 | 3.045531 | 0.027377 |
| HIF1AN  | 0.901417 | 0.559569 | 1.452107 | 0.669649 |
| NDUFB8  | 1.299387 | 0.649308 | 2.600316 | 0.45936  |
| ZFYVE19 | 2.172778 | 1.353698 | 3.487457 | 0.001307 |
| SPINT1  | 1.235314 | 1.053231 | 1.448876 | 0.009393 |
| FBN1    | 1.060728 | 0.880828 | 1.277371 | 0.53411  |
| AVPR1A  | 1.008037 | 0.748208 | 1.358099 | 0.958021 |
| DEPDC4  | 0.975806 | 0.590876 | 1.6115   | 0.923767 |
| LRTM2   | 0.845923 | 0.575898 | 1.242557 | 0.393692 |
| BRD7    | 1.324359 | 0.666836 | 2.630224 | 0.422279 |
| CKB     | 0.969341 | 0.819933 | 1.145975 | 0.715418 |
| TRMT61A | 1.356879 | 0.941454 | 1.955614 | 0.101742 |
| BTRC    | 0.721292 | 0.460808 | 1.129022 | 0.152966 |
| POLL    | 1.217111 | 0.712531 | 2.079012 | 0.471989 |
| BAG5    | 1.326077 | 0.767574 | 2.290961 | 0.311674 |
| API5    | 1.132984 | 0.695711 | 1.845095 | 0.615814 |
| ZNF319  | 1.261782 | 0.867984 | 1.834244 | 0.223144 |
| HPS6    | 2.140682 | 1.317377 | 3.478517 | 0.002121 |
| SENP8   | 0.842839 | 0.424091 | 1.67506  | 0.625611 |
| NOLC1   | 1.119626 | 0.775029 | 1.61744  | 0.547138 |
| ALKBH3  | 1.01864  | 0.615478 | 1.685889 | 0.942725 |
| COPS2   | 1.100392 | 0.678384 | 1.784923 | 0.698284 |
| SGPL1   | 1.409843 | 0.998521 | 1.990601 | 0.050991 |
| FRS2    | 0.693681 | 0.392482 | 1.226026 | 0.208147 |
| CCT2    | 0.897616 | 0.636298 | 1.266254 | 0.538374 |
| PCBD1   | 1.559148 | 1.113602 | 2.182954 | 0.009693 |
| ARIH1   | 0.573603 | 0.309838 | 1.061911 | 0.076927 |
| COX11   | 0.987564 | 0.64131  | 1.520767 | 0.954696 |
| ZNF202  | 0.878544 | 0.557329 | 1.384891 | 0.577081 |
| STXBP4  | 0.766174 | 0.521169 | 1.126357 | 0.1755   |
| CYYR1   | 1.10783  | 0.969504 | 1.265891 | 0.132364 |



|          |          |          |          |          |
|----------|----------|----------|----------|----------|
| CUL5     | 0.849902 | 0.525163 | 1.375444 | 0.507886 |
| C2       | 1.195026 | 0.981489 | 1.455021 | 0.076074 |
| PLEKHF1  | 1.132765 | 0.874899 | 1.466633 | 0.344202 |
| SMPD1    | 1.361889 | 0.936701 | 1.98008  | 0.105766 |
| APBB1    | 1.081894 | 0.851528 | 1.37458  | 0.519364 |
| SYNPO2L  | 1.860149 | 1.077007 | 3.212748 | 0.026012 |
| NUDT13   | 0.68305  | 0.440085 | 1.060155 | 0.089221 |
| TRIM44   | 1.716152 | 1.101024 | 2.674944 | 0.017081 |
| ILK      | 0.806583 | 0.473991 | 1.372549 | 0.428087 |
| TAF10    | 1.123611 | 0.618974 | 2.039669 | 0.701633 |
| TPP1     | 1.285293 | 0.899241 | 1.837079 | 0.168449 |
| DCHS1    | 0.947828 | 0.827396 | 1.085791 | 0.439631 |
| CYB5A    | 0.924106 | 0.58966  | 1.448243 | 0.730604 |
| USP54    | 0.948912 | 0.660243 | 1.363793 | 0.776897 |
| RAG1     | 1.138583 | 0.896998 | 1.445232 | 0.286145 |
| WDR88    | 0.972768 | 0.664788 | 1.423427 | 0.886959 |
| ATP9B    | 0.659392 | 0.420998 | 1.032777 | 0.068899 |
| PPFIBP2  | 1.243887 | 0.993897 | 1.556754 | 0.056587 |
| CYB5R2   | 1.644058 | 1.17968  | 2.291239 | 0.003328 |
| SERPINB8 | 0.914322 | 0.777095 | 1.075782 | 0.280339 |
| RIC3     | 0.939069 | 0.640339 | 1.377162 | 0.747601 |
| IDH3A    | 1.69214  | 1.160949 | 2.466378 | 0.006213 |
| CRABP1   | 1.079767 | 0.882238 | 1.321521 | 0.456575 |
| PLD4     | 1.222297 | 1.07001  | 1.396258 | 0.00311  |
| ZMAT1    | 0.635923 | 0.476357 | 0.84894  | 0.002134 |
| XRR1     | 0.833479 | 0.557493 | 1.246091 | 0.374696 |
| TRIM66   | 0.900467 | 0.649942 | 1.247559 | 0.528521 |
| RNF169   | 0.803374 | 0.557108 | 1.158501 | 0.24111  |
| RPL27A   | 1.350251 | 0.845358 | 2.156691 | 0.208813 |
| CDYL2    | 1.112677 | 0.878639 | 1.409055 | 0.375539 |
| CENPN    | 1.469515 | 0.956038 | 2.258773 | 0.079261 |
| ATMIN    | 1.262128 | 0.743567 | 2.142334 | 0.388482 |
| TMEM41B  | 0.827128 | 0.500023 | 1.368218 | 0.459846 |
| LEO1     | 0.886346 | 0.562482 | 1.396682 | 0.603068 |
| ZNF143   | 0.917131 | 0.553545 | 1.519533 | 0.737024 |
| TMX3     | 0.80185  | 0.529824 | 1.213542 | 0.296244 |
| MFAP4    | 0.919247 | 0.808303 | 1.045418 | 0.199456 |
| WEE1     | 1.257397 | 0.89215  | 1.772177 | 0.190816 |
| MAPK7    | 1.391825 | 1.06981  | 1.810769 | 0.013794 |
| PRKCB    | 1.215478 | 0.858671 | 1.720551 | 0.271076 |
| NDST2    | 0.491196 | 0.295497 | 0.816502 | 0.00611  |
| MCM7     | 0.921403 | 0.643551 | 1.319217 | 0.654851 |
| CCDC68   | 1.108008 | 0.639221 | 1.920592 | 0.714777 |
| CLEC4E   | 0.986359 | 0.875299 | 1.11151  | 0.821699 |
| ZNF3     | 0.506115 | 0.312429 | 0.819875 | 0.005659 |
| CLEC4D   | 0.932059 | 0.822035 | 1.056808 | 0.272277 |
| ZSCAN21  | 0.547267 | 0.357082 | 0.838746 | 0.005655 |
| RIMKLB   | 0.955747 | 0.797558 | 1.14531  | 0.623925 |
| TK2      | 1.625353 | 1.121575 | 2.355413 | 0.010285 |
| TMED3    | 1.635252 | 0.965802 | 2.768734 | 0.067182 |
| SEC11C   | 1.498586 | 0.975071 | 2.303177 | 0.065062 |
| TMEM135  | 0.985141 | 0.633684 | 1.531527 | 0.946982 |
| IQCD     | 0.773296 | 0.52891  | 1.130603 | 0.184648 |
| NDEL1    | 0.882148 | 0.538976 | 1.443823 | 0.617897 |
| CENPV    | 0.698057 | 0.512567 | 0.950673 | 0.022551 |
| RRAD     | 1.412681 | 0.988769 | 2.018336 | 0.057707 |
| HSP90B1  | 0.79873  | 0.612651 | 1.041327 | 0.096772 |
| BLCAP    | 1.667857 | 0.799377 | 3.479893 | 0.172812 |

|          |          |          |          |          |
|----------|----------|----------|----------|----------|
| CHRFAM7  | 1.197163 | 0.872962 | 1.641767 | 0.26408  |
| ATF7IP2  | 1.202206 | 0.909561 | 1.589008 | 0.19569  |
| TMPRSS5  | 0.804955 | 0.449426 | 1.441734 | 0.465604 |
| COG1     | 0.916471 | 0.585994 | 1.433324 | 0.702263 |
| PLEKHA7  | 1.162203 | 0.892671 | 1.513118 | 0.264172 |
| ZNF606   | 0.916817 | 0.652272 | 1.288656 | 0.617087 |
| B2M      | 0.984941 | 0.665353 | 1.458037 | 0.939566 |
| ZNF592   | 1.413462 | 0.853998 | 2.339436 | 0.178288 |
| NNMT     | 0.792215 | 0.626589 | 1.00162  | 0.051602 |
| ACSM1    | 0.820086 | 0.717044 | 0.937935 | 0.003788 |
| AP1G1    | 0.803879 | 0.458897 | 1.408206 | 0.445339 |
| SLFN5    | 0.996362 | 0.800527 | 1.240104 | 0.973959 |
| CATSPER2 | 1.021844 | 0.759313 | 1.375146 | 0.886585 |
| SAAL1    | 0.977745 | 0.580758 | 1.646098 | 0.932514 |
| YPEL4    | 0.925526 | 0.751348 | 1.140081 | 0.46689  |
| PPIB     | 0.870815 | 0.657437 | 1.153447 | 0.334774 |
| LDHC     | 1.423565 | 1.022727 | 1.981503 | 0.036335 |
| LDHAL6A  | 0.884152 | 0.581904 | 1.343391 | 0.564019 |
| FAM111A  | 0.952006 | 0.655359 | 1.382929 | 0.796273 |
| KIF7     | 0.995994 | 0.798897 | 1.241717 | 0.971538 |
| LDHD     | 1.095953 | 0.850347 | 1.412498 | 0.479101 |
| PEX11A   | 0.990977 | 0.687316 | 1.428797 | 0.961277 |
| TMEM170  | 0.856945 | 0.520648 | 1.41046  | 0.543696 |
| MESP1    | 1.505803 | 0.947029 | 2.394271 | 0.08364  |
| ANPEP    | 0.94082  | 0.806119 | 1.09803  | 0.439067 |
| RBPMS2   | 1.04283  | 0.916232 | 1.186922 | 0.52536  |
| NAV2     | 0.749633 | 0.441753 | 1.27209  | 0.28551  |
| ANKDD1A  | 1.208439 | 0.782818 | 1.865473 | 0.392741 |
| DCTN5    | 1.086987 | 0.646369 | 1.827966 | 0.753134 |
| TERF2IP  | 1.220592 | 0.634819 | 2.346884 | 0.550097 |
| PLK1     | 0.987812 | 0.761723 | 1.281008 | 0.926322 |
| CLPX     | 1.05494  | 0.616933 | 1.80392  | 0.845083 |
| GPR182   | 0.660537 | 0.36502  | 1.1953   | 0.170552 |
| ZBTB39   | 0.816901 | 0.50375  | 1.324717 | 0.412262 |
| TAC3     | 1.110564 | 0.829988 | 1.485987 | 0.480313 |
| MYO1A    | 0.652408 | 0.350712 | 1.213636 | 0.177472 |
| NAB2     | 0.767831 | 0.573807 | 1.02746  | 0.075457 |
| VPS39    | 1.234685 | 0.741449 | 2.056036 | 0.417804 |
| STAT6    | 1.691607 | 1.140836 | 2.50828  | 0.008908 |
| PATL1    | 1.643938 | 0.956665 | 2.824951 | 0.071927 |
| STX3     | 1.176235 | 0.897295 | 1.541888 | 0.239878 |
| MRPL16   | 2.091533 | 1.387519 | 3.152757 | 0.000425 |
| PIP4K2C  | 1.272893 | 0.898853 | 1.802581 | 0.174065 |
| MTMR10   | 0.806567 | 0.465323 | 1.398063 | 0.443691 |
| YWHAB    | 1.447743 | 0.950204 | 2.2058   | 0.085031 |
| SCG5     | 1.668933 | 1.165608 | 2.389599 | 0.005162 |
| TSC22D4  | 0.955139 | 0.670862 | 1.359878 | 0.79901  |
| MS4A7    | 1.096065 | 0.959775 | 1.25171  | 0.175755 |
| MS4A14   | 1.08351  | 0.949622 | 1.236276 | 0.233322 |
| DIS3L    | 1.183098 | 0.715706 | 1.955719 | 0.512053 |
| CCNDBP1  | 1.286779 | 0.73883  | 2.241112 | 0.373087 |
| EPB42    | 0.909656 | 0.795486 | 1.040213 | 0.166422 |
| SMAD3    | 1.596466 | 1.195385 | 2.132119 | 0.00153  |
| MAP1A    | 0.983503 | 0.863042 | 1.120779 | 0.802956 |
| RCCD1    | 0.779072 | 0.486122 | 1.248561 | 0.299524 |
| AKTIP    | 0.806631 | 0.532243 | 1.222474 | 0.311056 |
| MAPRE2   | 1.31276  | 0.912856 | 1.887852 | 0.142081 |
| MBD6     | 1.599396 | 1.083169 | 2.361653 | 0.01819  |

|         |          |          |          |          |
|---------|----------|----------|----------|----------|
| CNPY4   | 1.257898 | 0.747255 | 2.117494 | 0.387868 |
| PDIA3   | 0.760427 | 0.526015 | 1.099302 | 0.145261 |
| NUDT21  | 1.104391 | 0.75331  | 1.619092 | 0.610967 |
| NKX3-1  | 0.745785 | 0.573581 | 0.96969  | 0.028543 |
| DUSP18  | 1.631814 | 1.073943 | 2.479477 | 0.021781 |
| TEF     | 1.343299 | 0.888397 | 2.031134 | 0.16181  |
| MEI1    | 1.911612 | 1.273903 | 2.868554 | 0.001754 |
| PBX3    | 1.255102 | 1.092898 | 1.441379 | 0.00129  |
| GNGT2   | 1.731005 | 1.348833 | 2.22146  | 1.63E-05 |
| PHB     | 1.84707  | 1.160173 | 2.940654 | 0.009706 |
| SNRPD1  | 0.896977 | 0.542892 | 1.482002 | 0.671276 |
| TTC16   | 1.34135  | 0.938939 | 1.916225 | 0.106581 |
| SAMD14  | 1.102253 | 0.776866 | 1.563927 | 0.585458 |
| PIP5KL1 | 1.188493 | 0.855865 | 1.650395 | 0.302611 |
| TMEM92  | 1.161533 | 0.897008 | 1.504065 | 0.256105 |
| FAM102A | 1.108871 | 0.809132 | 1.519647 | 0.520398 |
| ACSF2   | 1.701903 | 1.148024 | 2.523007 | 0.008117 |
| GOLGA2  | 0.861858 | 0.531164 | 1.398436 | 0.547176 |
| TRUB2   | 1.298828 | 0.74192  | 2.273768 | 0.360119 |
| COQ4    | 1.031701 | 0.651371 | 1.6341   | 0.894188 |
| SLC27A4 | 1.724479 | 1.177004 | 2.526607 | 0.00517  |
| URM1    | 1.484678 | 0.888766 | 2.480143 | 0.131161 |
| CERCAM  | 0.791344 | 0.663759 | 0.943453 | 0.009084 |
| DOLPP1  | 1.181832 | 0.759524 | 1.83895  | 0.458932 |
| ENDOG   | 1.386779 | 0.99721  | 1.928536 | 0.051973 |
| SP2     | 1.255966 | 0.754342 | 2.09116  | 0.380936 |
| PRR15L  | 1.354223 | 0.874983 | 2.09595  | 0.173615 |
| COQ7    | 1.209659 | 0.559565 | 2.615022 | 0.628455 |
| GPRC5B  | 0.660169 | 0.305229 | 1.427856 | 0.291407 |
| CRK     | 1.451241 | 0.882627 | 2.386172 | 0.14214  |
| FBXO22  | 0.887469 | 0.567979 | 1.386671 | 0.600076 |
| TBC1D2B | 0.722061 | 0.527591 | 0.988213 | 0.041949 |
| NOD2    | 1.059397 | 0.920423 | 1.219354 | 0.421276 |
| SNX20   | 1.419262 | 0.982516 | 2.050149 | 0.062046 |
| LOXHD1  | 0.866578 | 0.704372 | 1.066139 | 0.175642 |
| KATNAL2 | 0.944818 | 0.639366 | 1.396197 | 0.77573  |
| HDHD2   | 0.472273 | 0.270288 | 0.8252   | 0.00842  |
| ZNF91   | 0.667249 | 0.495334 | 0.89883  | 0.007776 |
| RNF214  | 0.977931 | 0.523275 | 1.827624 | 0.944239 |
| DPEP2   | 1.137666 | 0.878791 | 1.472801 | 0.327525 |
| POP5    | 1.398219 | 0.780681 | 2.504244 | 0.259614 |
| CD3D    | 0.946032 | 0.818968 | 1.092811 | 0.450911 |
| TBC1D16 | 0.935758 | 0.768115 | 1.13999  | 0.509765 |
| ACAA2   | 0.989239 | 0.716276 | 1.366225 | 0.947635 |
| STIM1   | 1.092536 | 0.716219 | 1.666578 | 0.681234 |
| RRM1    | 1.156201 | 0.831917 | 1.606893 | 0.387467 |
| TRIM68  | 1.368571 | 0.900025 | 2.081037 | 0.142277 |
| FN3K    | 1.12536  | 0.919806 | 1.37685  | 0.251109 |
| IRGQ    | 0.748111 | 0.493221 | 1.134727 | 0.172151 |
| ZNF226  | 0.817935 | 0.581493 | 1.150517 | 0.248293 |
| ZNF180  | 1.026124 | 0.646567 | 1.628494 | 0.912858 |
| PPP2R3B | 0.878759 | 0.602606 | 1.281461 | 0.501911 |
| ZNF668  | 1.812724 | 1.100191 | 2.986727 | 0.019557 |
| ZNF646  | 1.36808  | 0.882258 | 2.121423 | 0.161433 |
| VKORC1  | 1.363869 | 0.842633 | 2.207532 | 0.206567 |
| GNG8    | 1.357024 | 0.947553 | 1.943441 | 0.095717 |
| LPO     | 0.811111 | 0.730656 | 0.900425 | 8.57E-05 |
| CA4     | 0.987521 | 0.695409 | 1.402337 | 0.944052 |

|          |          |          |          |          |
|----------|----------|----------|----------|----------|
| TPM4     | 0.810828 | 0.64083  | 1.025923 | 0.080676 |
| RAB8A    | 0.728004 | 0.437981 | 1.210076 | 0.220778 |
| GPX4     | 1.968723 | 1.341439 | 2.889337 | 0.000539 |
| MIDN     | 1.20842  | 0.914741 | 1.596385 | 0.182645 |
| JSRP1    | 1.098786 | 0.779003 | 1.549841 | 0.591385 |
| KLHL26   | 1.534068 | 0.928222 | 2.535347 | 0.09504  |
| GATAD2A  | 1.278389 | 0.720646 | 2.267795 | 0.401032 |
| MVD      | 1.717499 | 1.186538 | 2.486059 | 0.004152 |
| CDT1     | 1.027205 | 0.789188 | 1.337007 | 0.84181  |
| TRAPPC2L | 0.936152 | 0.579374 | 1.512634 | 0.787545 |
| ANKRD11  | 0.854959 | 0.539219 | 1.355581 | 0.505204 |
| PROCA1   | 1.00853  | 0.658063 | 1.545648 | 0.968895 |
| RPL13    | 1.218937 | 0.866728 | 1.714274 | 0.255165 |
| ZNF641   | 1.29931  | 0.921864 | 1.831297 | 0.134829 |
| CACNB3   | 1.188138 | 0.944991 | 1.493846 | 0.140041 |
| DHRS13   | 0.954076 | 0.679494 | 1.339615 | 0.786014 |
| TP53I13  | 1.120841 | 0.816692 | 1.538261 | 0.48001  |
| CORO6    | 0.978763 | 0.791588 | 1.210197 | 0.842874 |
| RHEBL1   | 1.829532 | 1.194112 | 2.803076 | 0.005522 |
| TUBA1A   | 1.286404 | 0.943517 | 1.7539   | 0.111304 |
| TUBA1C   | 1.513392 | 1.026764 | 2.230656 | 0.036313 |
| ZNF610   | 0.847365 | 0.671399 | 1.06945  | 0.16314  |
| ZNF528   | 0.917982 | 0.727661 | 1.158082 | 0.470353 |
| ZNF701   | 0.874275 | 0.604347 | 1.264765 | 0.475731 |
| SERTAD3  | 1.282575 | 0.896347 | 1.835227 | 0.173397 |
| RAB4B    | 0.945255 | 0.598913 | 1.491883 | 0.808928 |
| GPD1     | 1.867508 | 0.78527  | 4.441259 | 0.15763  |
| CYP2S1   | 0.984599 | 0.877427 | 1.104862 | 0.791805 |
| AXL      | 0.89109  | 0.694039 | 1.144087 | 0.36583  |
| NFKBID   | 1.109587 | 0.833637 | 1.476882 | 0.47599  |
| TMC4     | 0.872086 | 0.623144 | 1.220479 | 0.424804 |
| LAIR1    | 1.042905 | 0.762175 | 1.427036 | 0.792885 |
| TTYH1    | 0.906822 | 0.602933 | 1.363875 | 0.63857  |
| LENG8    | 1.006549 | 0.761902 | 1.329752 | 0.963357 |
| CDC42EP5 | 1.378326 | 0.886256 | 2.143605 | 0.154429 |
| LAIR2    | 1.019664 | 0.76565  | 1.357949 | 0.894024 |
| ZNF526   | 1.094598 | 0.675776 | 1.772993 | 0.713374 |
| TRAPPC9  | 1.293089 | 0.76907  | 2.174159 | 0.332278 |
| KIR3DL1  | 1.415177 | 1.062545 | 1.884838 | 0.017555 |
| ZNF146   | 0.913877 | 0.670706 | 1.245211 | 0.568292 |
| ZNF283   | 0.769851 | 0.512187 | 1.157136 | 0.20839  |
| PPP1R14A | 1.043499 | 0.851091 | 1.279404 | 0.682203 |
| SPINT2   | 1.2652   | 1.03307  | 1.54949  | 0.022932 |
| YIF1B    | 1.214454 | 0.836119 | 1.763983 | 0.307645 |
| PSCA     | 1.474368 | 0.979872 | 2.218411 | 0.062544 |
| ATCAY    | 0.148152 | 0.035141 | 0.624596 | 0.009293 |
| DAPK3    | 1.346172 | 0.843667 | 2.147978 | 0.212435 |
| EEF2     | 1.050347 | 0.744307 | 1.482223 | 0.779842 |
| TMIGD2   | 0.896084 | 0.797531 | 1.006814 | 0.064932 |
| CHAF1A   | 1.461042 | 0.996603 | 2.141919 | 0.052073 |
| UBXN6    | 1.444586 | 0.984043 | 2.120668 | 0.060403 |
| SEMA6B   | 1.124152 | 0.89289  | 1.415311 | 0.319307 |
| ZNF444   | 1.083377 | 0.776378 | 1.511771 | 0.63759  |
| NXN      | 0.853748 | 0.597169 | 1.220568 | 0.385925 |
| GLOD4    | 1.790134 | 0.831031 | 3.856148 | 0.136954 |
| MFSD3    | 1.225432 | 0.906975 | 1.655707 | 0.185491 |
| GPT      | 0.984146 | 0.754097 | 1.284374 | 0.90635  |
| KIFC2    | 1.253469 | 0.978764 | 1.605273 | 0.07347  |

|          |          |          |          |          |
|----------|----------|----------|----------|----------|
| SLC43A2  | 1.229562 | 1.044946 | 1.446796 | 0.012788 |
| RILP     | 1.47632  | 1.040373 | 2.094941 | 0.029137 |
| SERPINF2 | 1.230893 | 0.946237 | 1.601182 | 0.12159  |
| WDR81    | 1.16663  | 0.881818 | 1.543432 | 0.28048  |
| SRR      | 0.864708 | 0.536171 | 1.394556 | 0.551098 |
| TSR1     | 0.95638  | 0.646511 | 1.414768 | 0.823346 |
| HSD11B1L | 0.958222 | 0.658379 | 1.39462  | 0.823634 |
| CYB5D2   | 1.258308 | 0.793495 | 1.9954   | 0.328713 |
| KLK1     | 1.231043 | 0.95056  | 1.594288 | 0.115113 |
| ZNF83    | 0.794999 | 0.561794 | 1.125008 | 0.195306 |
| KRT80    | 1.155432 | 0.869528 | 1.535342 | 0.319213 |
| KRT1     | 0.78658  | 0.626707 | 0.987237 | 0.03838  |
| OTUB1    | 1.691274 | 1.156746 | 2.472807 | 0.006703 |
| RCOR2    | 0.773646 | 0.540896 | 1.10655  | 0.159877 |
| ANGPTL4  | 0.804836 | 0.545172 | 1.188178 | 0.274647 |
| CD320    | 0.917047 | 0.747801 | 1.124597 | 0.405463 |
| SPRYD3   | 2.162562 | 1.326602 | 3.525303 | 0.001978 |
| IGFBP6   | 1.165444 | 0.842169 | 1.612813 | 0.355665 |
| ZNF558   | 0.768479 | 0.508144 | 1.162192 | 0.212114 |
| NDUFV1   | 1.725629 | 1.114192 | 2.672604 | 0.014509 |
| CDK2AP2  | 1.118174 | 0.86085  | 1.452416 | 0.40255  |
| NUDT8    | 1.513177 | 1.153829 | 1.98444  | 0.00275  |
| TBX10    | 1.118781 | 0.862155 | 1.451793 | 0.398512 |
| PRDX2    | 1.023159 | 0.874005 | 1.197766 | 0.775804 |
| ZNF232   | 0.800551 | 0.575532 | 1.113547 | 0.186434 |
| MIS12    | 1.109133 | 0.665705 | 1.847927 | 0.690867 |
| CD300C   | 1.232957 | 1.085466 | 1.400489 | 0.001275 |
| CD300A   | 1.513885 | 1.219645 | 1.879112 | 0.000169 |
| TMEM88   | 1.179004 | 0.896698 | 1.550188 | 0.238328 |
| EVPL     | 0.938636 | 0.827141 | 1.065161 | 0.326325 |
| SRP68    | 1.488537 | 0.760244 | 2.914514 | 0.245899 |
| MGAT5B   | 1.011484 | 0.775862 | 1.318663 | 0.932746 |
| TMC8     | 1.311062 | 0.993909 | 1.729417 | 0.055273 |
| TK1      | 1.337458 | 1.008688 | 1.773387 | 0.043377 |
| TMEM68   | 0.707778 | 0.43984  | 1.138934 | 0.154452 |
| TMEM99   | 1.082723 | 0.758945 | 1.544628 | 0.661075 |
| GHDC     | 1.415    | 0.916925 | 2.18363  | 0.116843 |
| ZNF598   | 1.18751  | 0.872645 | 1.615983 | 0.274252 |
| RAB26    | 1.230889 | 0.942338 | 1.607797 | 0.127458 |
| MLST8    | 1.505711 | 0.99597  | 2.276338 | 0.052281 |
| E4F1     | 1.141127 | 0.803746 | 1.620127 | 0.460364 |
| DNASE1L2 | 0.924519 | 0.641615 | 1.332164 | 0.673685 |
| CASKIN1  | 0.451952 | 0.258228 | 0.791008 | 0.005421 |
| ABCA3    | 0.819886 | 0.660053 | 1.018424 | 0.07266  |
| KCTD5    | 1.738736 | 1.120208 | 2.698785 | 0.013662 |
| SRRM2    | 1.097781 | 0.734814 | 1.640039 | 0.648757 |
| ZNF597   | 0.732621 | 0.511257 | 1.04983  | 0.090069 |
| NLRC3    | 1.005217 | 0.786711 | 1.284413 | 0.96681  |
| SDHAF2   | 1.860665 | 0.932829 | 3.711372 | 0.07797  |
| DDB1     | 1.390436 | 0.820843 | 2.355278 | 0.22028  |
| VPS37C   | 1.645001 | 1.137248 | 2.379453 | 0.008221 |
| VWCE     | 0.889186 | 0.731053 | 1.081524 | 0.239777 |
| RAB3IL1  | 0.912413 | 0.74207  | 1.121858 | 0.384642 |
| BEST1    | 1.183964 | 0.915995 | 1.530327 | 0.197125 |
| FTH1     | 1.382779 | 1.094894 | 1.746359 | 0.006506 |
| BSCL2    | 0.759847 | 0.380027 | 1.519284 | 0.437231 |
| POLR2G   | 1.800307 | 1.041743 | 3.111232 | 0.035163 |
| SLC3A2   | 1.390634 | 0.856343 | 2.258282 | 0.182518 |

|          |          |          |          |          |
|----------|----------|----------|----------|----------|
| ATG16L2  | 0.968948 | 0.685233 | 1.370132 | 0.858364 |
| C2CD3    | 0.966113 | 0.614467 | 1.518997 | 0.881305 |
| TTC21A   | 0.826065 | 0.55346  | 1.232939 | 0.349707 |
| RPSA     | 1.108944 | 0.731894 | 1.680237 | 0.625723 |
| CTNNB1   | 0.85979  | 0.569953 | 1.297018 | 0.471422 |
| ULK4     | 0.537928 | 0.350258 | 0.826151 | 0.00462  |
| FADD     | 2.149923 | 1.336654 | 3.458015 | 0.001596 |
| LTBP3    | 0.968206 | 0.811198 | 1.155603 | 0.720406 |
| NAALADL  | 0.959593 | 0.82521  | 1.115859 | 0.592077 |
| SAC3D1   | 1.229836 | 0.854773 | 1.769471 | 0.265036 |
| BATF2    | 1.448718 | 1.140065 | 1.840933 | 0.002427 |
| SF1      | 1.167952 | 0.668083 | 2.041829 | 0.585934 |
| MAP4K2   | 1.240632 | 0.892329 | 1.724887 | 0.199696 |
| CCDC88B  | 1.383873 | 1.12567  | 1.701302 | 0.002046 |
| SCARA3   | 0.961282 | 0.810234 | 1.140488 | 0.650733 |
| PBK      | 0.948231 | 0.742064 | 1.211675 | 0.670856 |
| PNOC     | 1.627082 | 1.20333  | 2.200058 | 0.001565 |
| COPS6    | 1.425628 | 0.840496 | 2.418114 | 0.188374 |
| PAFAH1B2 | 0.841165 | 0.47209  | 1.498779 | 0.557264 |
| ANKS3    | 0.750069 | 0.477512 | 1.178196 | 0.211949 |
| NUDT16L1 | 1.278489 | 0.864085 | 1.891635 | 0.219028 |
| KIAA1586 | 0.692438 | 0.487779 | 0.982966 | 0.039775 |
| RAB4A    | 1.02649  | 0.63761  | 1.65255  | 0.9143   |
| OR2B2    | 1.020081 | 0.635635 | 1.637048 | 0.934341 |
| SETD5    | 0.569399 | 0.337544 | 0.960513 | 0.034774 |
| VASN     | 0.863608 | 0.615255 | 1.21221  | 0.396667 |
| THAP9    | 0.695261 | 0.42911  | 1.12649  | 0.139886 |
| RNF187   | 1.582879 | 1.04648  | 2.394223 | 0.029619 |
| HOOK3    | 1.150317 | 0.808879 | 1.635879 | 0.435732 |
| MAPK1IP1 | 1.875973 | 0.861296 | 4.086024 | 0.113191 |
| DDIT4    | 1.262129 | 1.110999 | 1.433816 | 0.000347 |
| RBPJ     | 0.828094 | 0.516263 | 1.328273 | 0.433961 |
| LMBRD1   | 1.23073  | 0.692596 | 2.186984 | 0.479094 |
| ZCCHC4   | 0.591923 | 0.330612 | 1.05977  | 0.077629 |
| PTGDR    | 1.099366 | 0.894968 | 1.350446 | 0.366713 |
| TTC39C   | 1.368418 | 0.950106 | 1.970904 | 0.091987 |
| GLYCTK   | 0.868598 | 0.542019 | 1.391949 | 0.558213 |
| GNG4     | 0.719937 | 0.411532 | 1.259462 | 0.249511 |
| UBTD2    | 1.067776 | 0.746887 | 1.52653  | 0.719139 |
| POLR2J3  | 0.79814  | 0.49295  | 1.292275 | 0.359104 |
| NKIRAS2  | 1.073162 | 0.626086 | 1.839484 | 0.797322 |
| DNAJC7   | 0.850284 | 0.527749 | 1.369938 | 0.505106 |
| KCNV2    | 1.004741 | 0.679242 | 1.486221 | 0.981109 |
| IRF2BP2  | 0.771794 | 0.491289 | 1.212456 | 0.261004 |
| NT5DC2   | 1.0185   | 0.858411 | 1.208444 | 0.833592 |
| FOXI1    | 1.178135 | 0.698779 | 1.986328 | 0.538485 |
| BMI1     | 1.147316 | 0.923231 | 1.425792 | 0.215153 |
| THAP11   | 2.234747 | 1.326781 | 3.764071 | 0.002504 |
| MMADHC   | 1.285436 | 0.777004 | 2.126561 | 0.32826  |
| PDHB     | 0.831691 | 0.448514 | 1.542224 | 0.55859  |
| PXK      | 0.649059 | 0.466455 | 0.903148 | 0.010337 |
| PCMTD1   | 0.781711 | 0.518459 | 1.178633 | 0.239804 |
| KCTD6    | 0.848365 | 0.567915 | 1.267307 | 0.421931 |
| ACOX2    | 1.207975 | 0.959357 | 1.521021 | 0.108041 |
| IRF2     | 1.458465 | 0.936518 | 2.271307 | 0.094965 |
| CX3CR1   | 1.140115 | 1.03093  | 1.260863 | 0.010679 |
| XIRP1    | 2.096813 | 0.401757 | 10.94349 | 0.379796 |
| DEGS2    | 1.078641 | 0.829437 | 1.402719 | 0.572225 |

|          |          |          |          |          |
|----------|----------|----------|----------|----------|
| ARF4     | 0.718141 | 0.412007 | 1.251743 | 0.242842 |
| FILIP1L  | 1.179947 | 0.835822 | 1.665754 | 0.346929 |
| DTYMK    | 1.116381 | 0.692835 | 1.79885  | 0.651047 |
| TAP1     | 1.276616 | 0.947914 | 1.719301 | 0.107879 |
| ING5     | 0.820421 | 0.556461 | 1.20959  | 0.317645 |
| ATG4B    | 1.05372  | 0.69461  | 1.598486 | 0.805604 |
| MLKL     | 1.05918  | 0.773199 | 1.450935 | 0.720296 |
| RFWD3    | 1.00044  | 0.680536 | 1.470722 | 0.998215 |
| RHOH     | 0.929656 | 0.747524 | 1.156163 | 0.512055 |
| KLHL30   | 1.682242 | 1.125416 | 2.514571 | 0.011211 |
| COG7     | 1.050195 | 0.630999 | 1.747881 | 0.850539 |
| CDC40    | 1.032169 | 0.632323 | 1.684856 | 0.899223 |
| STIP1    | 1.624892 | 0.987636 | 2.673327 | 0.056006 |
| HR       | 0.627544 | 0.382763 | 1.028864 | 0.064724 |
| RAB31    | 1.172596 | 1.036264 | 1.326863 | 0.011575 |
| REEP4    | 1.386271 | 0.93781  | 2.049185 | 0.101429 |
| TNXB     | 1.028318 | 0.827726 | 1.27752  | 0.800873 |
| BMP1     | 1.019506 | 0.771991 | 1.346378 | 0.891704 |
| ATXN2L   | 1.1981   | 0.760001 | 1.888739 | 0.436422 |
| POLR3D   | 0.834514 | 0.565189 | 1.232179 | 0.362889 |
| FEN1     | 1.539595 | 1.080786 | 2.193176 | 0.016835 |
| HEXIM2   | 1.090735 | 0.739587 | 1.608605 | 0.661281 |
| FNTA     | 1.220534 | 0.626431 | 2.378081 | 0.558145 |
| SERINC2  | 1.224808 | 1.063171 | 1.41102  | 0.004981 |
| COL3A1   | 0.887176 | 0.729105 | 1.079518 | 0.231808 |
| ING2     | 0.98654  | 0.579528 | 1.679403 | 0.960183 |
| CDKN2AIP | 0.807458 | 0.538542 | 1.210654 | 0.300709 |
| SNRNP48  | 0.542072 | 0.305497 | 0.961849 | 0.036357 |
| SLC20A2  | 0.538775 | 0.310974 | 0.933451 | 0.027415 |
| TMUB2    | 1.557753 | 0.900174 | 2.695695 | 0.113169 |
| STAT3    | 0.820701 | 0.507249 | 1.327849 | 0.420878 |
| ZSWIM1   | 1.727897 | 1.056033 | 2.827211 | 0.029482 |
| ADAM9    | 0.95628  | 0.758005 | 1.206418 | 0.706112 |
| AXIN2    | 0.99046  | 0.56042  | 1.750493 | 0.973683 |
| NDUFS5   | 1.219662 | 0.741815 | 2.005318 | 0.433785 |
| ZNF30    | 0.840294 | 0.62221  | 1.134818 | 0.256375 |
| UGT3A2   | 0.807792 | 0.713046 | 0.915128 | 0.000799 |
| SLC16A4  | 0.720084 | 0.482279 | 1.075146 | 0.108344 |
| IL7R     | 0.964064 | 0.800517 | 1.161023 | 0.699603 |
| TMEM208  | 1.277511 | 0.702306 | 2.323821 | 0.422374 |
| AHCYL1   | 1.839766 | 1.078396 | 3.13868  | 0.025293 |
| DNAJC21  | 0.981223 | 0.549595 | 1.751834 | 0.948893 |
| PKIG     | 0.967915 | 0.730964 | 1.281676 | 0.819925 |
| FAM178B  | 0.957475 | 0.801483 | 1.143826 | 0.631981 |
| SEMA4C   | 0.97128  | 0.807732 | 1.167943 | 0.756746 |
| CNNM3    | 0.8276   | 0.515788 | 1.327912 | 0.432824 |
| GSTM4    | 1.171319 | 0.815783 | 1.681807 | 0.391566 |
| TET2     | 0.904502 | 0.712225 | 1.148687 | 0.410427 |
| TCTN2    | 0.675187 | 0.455882 | 0.99999  | 0.049994 |
| SHOX2    | 0.765393 | 0.385019 | 1.52155  | 0.44566  |
| TSPAN5   | 1.08804  | 0.892669 | 1.326172 | 0.403386 |
| ABHD15   | 1.394372 | 0.963833 | 2.01723  | 0.077656 |
| ZBTB5    | 0.811157 | 0.534036 | 1.232079 | 0.326411 |
| CHTF8    | 0.759575 | 0.35627  | 1.61943  | 0.476506 |
| ADAL     | 0.998935 | 0.670048 | 1.489255 | 0.995829 |
| LCMT2    | 1.546082 | 1.030382 | 2.319888 | 0.035333 |
| SNTB2    | 1.033991 | 0.800599 | 1.335423 | 0.797877 |
| IL12A    | 1.035154 | 0.826099 | 1.297112 | 0.764042 |

|         |          |          |          |          |
|---------|----------|----------|----------|----------|
| ZNF507  | 0.801581 | 0.605034 | 1.061976 | 0.123317 |
| STX18   | 0.941977 | 0.523026 | 1.696514 | 0.842164 |
| GFM1    | 1.024308 | 0.615267 | 1.705288 | 0.926419 |
| DDX19A  | 0.920774 | 0.442954 | 1.914023 | 0.825028 |
| ANKRD49 | 0.943483 | 0.583828 | 1.524697 | 0.812219 |
| SFTP8   | 0.855987 | 0.400694 | 1.828612 | 0.68804  |
| USP39   | 2.410637 | 1.103133 | 5.267881 | 0.02738  |
| TNIP2   | 1.421904 | 0.951374 | 2.125148 | 0.08601  |
| TMEM150 | 0.801496 | 0.577018 | 1.113303 | 0.186905 |
| RNF181  | 1.459378 | 0.872145 | 2.442007 | 0.15011  |
| VAMP5   | 0.996552 | 0.809861 | 1.22628  | 0.973967 |
| LRRC28  | 0.790065 | 0.619279 | 1.007951 | 0.057929 |
| MAT2A   | 0.755897 | 0.555075 | 1.029373 | 0.075697 |
| ENHO    | 1.095039 | 0.810589 | 1.479309 | 0.554115 |
| ZNF608  | 0.807055 | 0.694646 | 0.937654 | 0.005092 |
| INPP5D  | 1.021952 | 0.661331 | 1.579219 | 0.922099 |
| LETM1   | 1.192185 | 0.716429 | 1.983872 | 0.498698 |
| TMEM129 | 1.243419 | 0.823112 | 1.878349 | 0.300623 |
| PPIC    | 1.830465 | 1.182817 | 2.832732 | 0.006656 |
| SPRY3   | 1.337756 | 0.833349 | 2.14747  | 0.228191 |
| CEP120  | 0.690708 | 0.426925 | 1.117472 | 0.131686 |
| STXBP6  | 1.035561 | 0.654223 | 1.639177 | 0.881451 |
| MFF     | 1.03718  | 0.525709 | 2.046271 | 0.916141 |
| LGALS9  | 1.496188 | 1.133915 | 1.974203 | 0.004394 |
| SIGLEC7 | 1.117763 | 0.966235 | 1.293053 | 0.134175 |
| E2F6    | 0.75446  | 0.446817 | 1.273923 | 0.29181  |
| FEM1B   | 1.213782 | 0.737135 | 1.99864  | 0.446423 |
| COMMD8  | 1.20232  | 0.873953 | 1.654064 | 0.257579 |
| UQCRCF1 | 1.265322 | 0.709074 | 2.257932 | 0.425781 |
| MAP2K1  | 1.369249 | 0.99766  | 1.879241 | 0.05172  |
| HNRNPH1 | 0.593638 | 0.377478 | 0.933578 | 0.023977 |
| IRS1    | 0.833217 | 0.579395 | 1.198235 | 0.324954 |
| MECP2   | 1.046845 | 0.613797 | 1.785421 | 0.866526 |
| UPF3A   | 1.39358  | 0.833818 | 2.329122 | 0.205355 |
| ROR2    | 0.768075 | 0.466897 | 1.263534 | 0.298825 |
| BRD7P3  | 1.001376 | 0.761055 | 1.317584 | 0.992164 |
| AR      | 0.879477 | 0.757565 | 1.021009 | 0.091627 |
| DHRX    | 0.575352 | 0.352031 | 0.940342 | 0.027428 |
| HSPBAP1 | 1.078833 | 0.72383  | 1.607948 | 0.7094   |
| ASMTL   | 1.191873 | 0.767075 | 1.85192  | 0.435016 |
| SLC25A6 | 1.275608 | 0.904647 | 1.798686 | 0.165016 |
| CHST14  | 0.95474  | 0.605916 | 1.504382 | 0.841758 |
| PARM1   | 1.06023  | 0.78469  | 1.432523 | 0.703284 |
| CSNK1G1 | 0.640266 | 0.438767 | 0.934301 | 0.020756 |
| FAM110B | 0.919748 | 0.746065 | 1.133864 | 0.433374 |
| AFAP1L2 | 1.034896 | 0.830179 | 1.290096 | 0.760357 |
| ZNF354A | 1.047011 | 0.710149 | 1.543665 | 0.816592 |
| ATF5    | 1.457887 | 1.001004 | 2.123303 | 0.049392 |
| UBE2V2  | 0.975311 | 0.622629 | 1.527766 | 0.913067 |
| ZBTB43  | 1.380429 | 0.896698 | 2.125111 | 0.143024 |
| XPO6    | 1.804843 | 1.092853 | 2.980693 | 0.021063 |
| MN1     | 1.029594 | 0.927288 | 1.143186 | 0.584942 |
| APEX2   | 2.049177 | 1.232639 | 3.406615 | 0.005666 |
| NSMCE1  | 2.336991 | 1.293023 | 4.223841 | 0.00494  |
| CCDC126 | 1.019634 | 0.713343 | 1.45744  | 0.915044 |
| IL13    | 1.18581  | 0.753391 | 1.866419 | 0.461487 |
| CD2BP2  | 1.663414 | 0.937473 | 2.951494 | 0.081986 |
| RGS14   | 1.595568 | 1.211145 | 2.102007 | 0.000894 |



|          |          |          |          |          |
|----------|----------|----------|----------|----------|
| TBC1D10B | 1.783157 | 1.081318 | 2.940531 | 0.023433 |
| LMAN2    | 1.085162 | 0.717677 | 1.640816 | 0.698441 |
| RAB24    | 1.273732 | 0.921672 | 1.76027  | 0.142699 |
| PRELID1  | 1.620951 | 1.156057 | 2.272797 | 0.005097 |
| THBS3    | 1.200137 | 0.819974 | 1.756555 | 0.347886 |
| CA5B     | 1.211725 | 0.87903  | 1.670338 | 0.240933 |
| EFNA1    | 0.96161  | 0.793324 | 1.165594 | 0.690019 |
| CXCL10   | 1.267911 | 1.084118 | 1.482862 | 0.00297  |
| SH3TC2   | 1.458963 | 1.140166 | 1.866897 | 0.002676 |
| CXCL11   | 1.639934 | 1.106544 | 2.430436 | 0.013726 |
| ZRSR2    | 1.415438 | 0.910583 | 2.200199 | 0.122646 |
| NMD3     | 0.853983 | 0.574703 | 1.268982 | 0.434734 |
| ADRB2    | 0.888736 | 0.75361  | 1.04809  | 0.16098  |
| B3GALNT1 | 1.028403 | 0.809896 | 1.305862 | 0.818237 |
| GPRIN1   | 1.562597 | 1.038769 | 2.35058  | 0.03215  |
| KCNAB1   | 0.975344 | 0.582436 | 1.633304 | 0.924389 |
| MRPL1    | 0.988283 | 0.661167 | 1.477242 | 0.954172 |
| SHE      | 1.063456 | 0.629554 | 1.796411 | 0.818088 |
| PGM2     | 0.986663 | 0.649692 | 1.498409 | 0.94978  |
| P2RY12   | 1.244896 | 1.009603 | 1.535025 | 0.040425 |
| SLC33A1  | 0.751386 | 0.430371 | 1.311847 | 0.31475  |
| SNUPN    | 1.177367 | 0.664692 | 2.085466 | 0.575641 |
| CRADD    | 1.211063 | 0.814111 | 1.801563 | 0.344637 |
| SIN3A    | 0.811579 | 0.461909 | 1.425952 | 0.467832 |
| ARL13B   | 0.868396 | 0.533277 | 1.414108 | 0.570585 |
| RNASE2   | 0.976988 | 0.878137 | 1.086966 | 0.66882  |
| RNASE3   | 0.964731 | 0.875404 | 1.063173 | 0.468893 |
| PTK2     | 1.188534 | 1.02745  | 1.374873 | 0.020105 |
| PTAFR    | 1.144958 | 1.009401 | 1.298719 | 0.035247 |
| PTPN9    | 1.642271 | 1.007765 | 2.67627  | 0.04648  |
| RNASE6   | 1.130109 | 1.00834  | 1.266584 | 0.035488 |
| SCN9A    | 0.966684 | 0.830399 | 1.125335 | 0.662098 |
| SDC2     | 1.196386 | 0.987863 | 1.448924 | 0.066506 |
| CD52     | 1.308494 | 1.141105 | 1.500437 | 0.000118 |
| MMGT1    | 0.988032 | 0.607054 | 1.608105 | 0.961359 |
| TM2D2    | 1.324527 | 0.705194 | 2.487787 | 0.382167 |
| HTRA4    | 0.853176 | 0.581786 | 1.251163 | 0.416286 |
| PLEKHA2  | 1.172135 | 0.777711 | 1.766597 | 0.447951 |
| CLIC4    | 1.05526  | 0.819771 | 1.358396 | 0.676325 |
| GPR183   | 1.058035 | 0.872057 | 1.283675 | 0.56735  |
| CCDC8    | 0.984365 | 0.819604 | 1.182247 | 0.866101 |
| ZEB2     | 0.968306 | 0.715205 | 1.310976 | 0.834958 |
| PCBP1    | 1.354872 | 0.963478 | 1.905262 | 0.0808   |
| HINT1    | 0.621275 | 0.421635 | 0.915442 | 0.016099 |
| DTWD2    | 0.787567 | 0.541784 | 1.144851 | 0.21086  |
| VPREB1   | 0.979794 | 0.877127 | 1.094477 | 0.717759 |
| CLIC3    | 1.237611 | 1.002328 | 1.528124 | 0.047526 |
| INO80E   | 1.519501 | 1.014739 | 2.275349 | 0.042256 |
| DFFB     | 0.925516 | 0.635185 | 1.348552 | 0.686938 |
| NFU1     | 1.244351 | 0.64618  | 2.396252 | 0.513195 |
| CKAP2L   | 0.932367 | 0.708206 | 1.22748  | 0.617695 |
| APLF     | 0.561941 | 0.323442 | 0.976304 | 0.040849 |
| BOLA2B   | 1.464292 | 0.718342 | 2.98486  | 0.293922 |
| RGPD8    | 0.888797 | 0.533431 | 1.480903 | 0.65086  |
| HIC2     | 1.228954 | 0.805679 | 1.874602 | 0.338573 |
| LUZP1    | 0.912821 | 0.650461 | 1.281002 | 0.597781 |
| BUB1     | 0.866776 | 0.664054 | 1.131386 | 0.29288  |
| SPNS1    | 0.894034 | 0.499818 | 1.599176 | 0.705773 |

|          |          |          |          |          |
|----------|----------|----------|----------|----------|
| LRRC45   | 1.140208 | 0.788886 | 1.647988 | 0.485069 |
| AGPAT2   | 1.539429 | 1.089038 | 2.176089 | 0.014567 |
| ASPSCR1  | 1.465087 | 0.91174  | 2.354268 | 0.114532 |
| GP9      | 1.111783 | 0.948753 | 1.302827 | 0.190285 |
| FASN     | 1.116254 | 0.85247  | 1.461663 | 0.423974 |
| CNBP     | 1.563591 | 0.861474 | 2.837948 | 0.141646 |
| MT1E     | 1.251649 | 1.060474 | 1.477288 | 0.007948 |
| DUS1L    | 1.464753 | 0.965041 | 2.223224 | 0.073002 |
| GPS1     | 1.586884 | 1.019961 | 2.468917 | 0.040599 |
| RFNG     | 1.060659 | 0.758231 | 1.483714 | 0.730942 |
| DCXR     | 1.390006 | 0.996566 | 1.938775 | 0.052416 |
| ZNF32    | 1.148334 | 0.766739 | 1.719843 | 0.502132 |
| LDB2     | 0.91777  | 0.518805 | 1.623545 | 0.768118 |
| RAC3     | 1.002454 | 0.790398 | 1.271402 | 0.983877 |
| NRG4     | 1.274764 | 1.047567 | 1.551236 | 0.015352 |
| LIMS1    | 1.381393 | 1.003299 | 1.901971 | 0.047687 |
| TAPT1    | 0.758444 | 0.472603 | 1.217169 | 0.251944 |
| UGP2     | 0.736524 | 0.49276  | 1.100876 | 0.135883 |
| HNRNPF   | 1.638667 | 0.996189 | 2.695504 | 0.051784 |
| BTD      | 0.823194 | 0.514489 | 1.317129 | 0.417179 |
| CSGALNA1 | 0.926869 | 0.649216 | 1.323268 | 0.675912 |
| PCDH7    | 0.102053 | 0.000427 | 24.40927 | 0.414109 |
| ROBO1    | 0.997493 | 0.832913 | 1.194593 | 0.978231 |
| AVEN     | 0.629036 | 0.417399 | 0.947979 | 0.026742 |
| P2RY1    | 1.254868 | 0.985863 | 1.597273 | 0.065139 |
| CTNND2   | 0.899357 | 0.523596 | 1.544786 | 0.70074  |
| TRIM56   | 1.272467 | 0.78878  | 2.052754 | 0.323376 |
| AHSP     | 0.90746  | 0.825192 | 0.997929 | 0.045208 |
| WNT10B   | 1.190577 | 0.885226 | 1.601257 | 0.248632 |
| REPS2    | 1.143913 | 0.836547 | 1.564213 | 0.399714 |
| SYAP1    | 1.276975 | 0.802515 | 2.031945 | 0.302237 |
| ITGAM    | 1.205334 | 1.05506  | 1.377011 | 0.00598  |
| PYDC1    | 1.089655 | 0.811194 | 1.463703 | 0.568512 |
| TPST1    | 0.903572 | 0.745075 | 1.095787 | 0.302813 |
| TOR1AIP2 | 1.372451 | 0.699511 | 2.692771 | 0.357211 |
| S100G    | 0.773512 | 0.568836 | 1.051834 | 0.101484 |
| TM4SF1   | 1.09966  | 0.96787  | 1.249396 | 0.144684 |
| OTUD3    | 1.077521 | 0.681    | 1.70492  | 0.749791 |
| GUSB     | 1.059495 | 0.758255 | 1.480413 | 0.73491  |
| BRD3     | 0.755161 | 0.389664 | 1.463486 | 0.40548  |
| KLF13    | 1.582246 | 1.102009 | 2.271762 | 0.012908 |
| ZFPM2    | 1.319855 | 1.055685 | 1.65013  | 0.01487  |
| ZNF764   | 0.873987 | 0.493381 | 1.548199 | 0.644301 |
| ZNF747   | 1.106238 | 0.534454 | 2.289744 | 0.785607 |
| ZNF768   | 1.698473 | 1.036576 | 2.783018 | 0.035506 |
| TAS1R3   | 1.012875 | 0.689038 | 1.488911 | 0.948106 |
| TMEM42   | 0.884128 | 0.53418  | 1.463333 | 0.631908 |
| MAP3K2   | 0.794317 | 0.509045 | 1.239457 | 0.310421 |
| PUSL1    | 1.861797 | 1.171922 | 2.95778  | 0.008496 |
| SF3B5    | 1.481776 | 0.948859 | 2.313999 | 0.083785 |
| ZNF35    | 0.782431 | 0.489011 | 1.251912 | 0.306264 |
| IFFO2    | 1.326171 | 0.988632 | 1.778953 | 0.059609 |
| NLGN2    | 1.001385 | 0.821136 | 1.2212   | 0.989094 |
| MYO7B    | 0.929774 | 0.770953 | 1.121313 | 0.446127 |
| CHD3     | 1.408795 | 1.029796 | 1.927277 | 0.032065 |
| TMEM154  | 1.146957 | 0.89091  | 1.476592 | 0.28743  |
| MYRIP    | 1.208552 | 0.876489 | 1.666417 | 0.247818 |
| ALCAM    | 0.986802 | 0.757377 | 1.285725 | 0.921606 |

|          |          |          |          |          |
|----------|----------|----------|----------|----------|
| YWHAG    | 1.102815 | 0.685519 | 1.774132 | 0.686624 |
| UBE2E3   | 1.069907 | 0.834688 | 1.371413 | 0.593724 |
| CNTROB   | 0.893137 | 0.629357 | 1.267475 | 0.526867 |
| TRAPPC1  | 1.730998 | 1.181826 | 2.535359 | 0.004833 |
| KCNAB3   | 0.879429 | 0.601234 | 1.286347 | 0.507854 |
| FAM153A  | 0.650989 | 0.397953 | 1.064916 | 0.08736  |
| GPR37L1  | 0.884502 | 0.589246 | 1.327704 | 0.553707 |
| TMEM192  | 0.769301 | 0.465267 | 1.272012 | 0.306678 |
| ZNF778   | 0.771448 | 0.516493 | 1.152257 | 0.204931 |
| NIPA1    | 1.233849 | 0.965308 | 1.577096 | 0.093343 |
| FOXD4    | 0.777674 | 0.449036 | 1.346835 | 0.369533 |
| GPR25    | 1.346464 | 1.057183 | 1.714902 | 0.015928 |
| UBE2E1   | 0.536913 | 0.333809 | 0.863596 | 0.010325 |
| HNRNPA3  | 0.638469 | 0.39498  | 1.032059 | 0.067074 |
| SIK2     | 1.124025 | 0.685055 | 1.844276 | 0.643529 |
| RNF150   | 0.851244 | 0.630449 | 1.149366 | 0.29313  |
| CCDC144/ | 0.904624 | 0.744849 | 1.09867  | 0.312053 |
| CHRN1    | 0.645855 | 0.453516 | 0.919766 | 0.015366 |
| GYP A    | 0.862947 | 0.728873 | 1.021685 | 0.08709  |
| USP38    | 1.185751 | 0.735482 | 1.911681 | 0.484441 |
| SLC16A5  | 1.09721  | 0.79155  | 1.520902 | 0.577635 |
| NANP     | 1.386333 | 0.955488 | 2.011453 | 0.085399 |
| PWWP2A   | 0.508023 | 0.317509 | 0.812852 | 0.004743 |
| USP50    | 0.545179 | 0.316788 | 0.938232 | 0.028513 |
| USP47    | 0.906049 | 0.562619 | 1.459113 | 0.68487  |
| PDCD6IP  | 1.084357 | 0.644129 | 1.825458 | 0.76055  |
| ZNF212   | 0.709357 | 0.41478  | 1.213143 | 0.209751 |
| MRAP     | 0.700134 | 0.44828  | 1.093485 | 0.117093 |
| FAM161A  | 0.801785 | 0.553734 | 1.160952 | 0.242107 |
| ZNF282   | 0.953349 | 0.593141 | 1.532307 | 0.84358  |
| GLB1     | 0.976336 | 0.646101 | 1.47536  | 0.909482 |
| CRTAP    | 0.961161 | 0.625121 | 1.477842 | 0.856776 |
| CNGB3    | 1.344205 | 0.327381 | 5.519206 | 0.681461 |
| CMTM8    | 0.880824 | 0.708889 | 1.09446  | 0.252079 |
| GABARAP  | 0.869704 | 0.546473 | 1.384122 | 0.555968 |
| STX8     | 1.127646 | 0.595379 | 2.135759 | 0.712385 |
| UBB      | 1.174151 | 0.720958 | 1.91222  | 0.518815 |
| NFRKB    | 1.040484 | 0.708379 | 1.528287 | 0.83967  |
| FABP4    | 0.919467 | 0.762866 | 1.108214 | 0.378118 |
| PRDM10   | 0.82958  | 0.50903  | 1.351989 | 0.453401 |
| B3GNT2   | 0.952649 | 0.678118 | 1.338322 | 0.779713 |
| FOS      | 0.964032 | 0.810698 | 1.146366 | 0.678538 |
| TMED10   | 1.134132 | 0.67078  | 1.917552 | 0.638546 |
| SETMAR   | 0.754906 | 0.497152 | 1.146296 | 0.18707  |
| SMAD1    | 1.05164  | 0.864434 | 1.279387 | 0.61467  |
| EMX2     | 1.462765 | 0.850337 | 2.516274 | 0.169383 |
| SP7      | 0.84508  | 0.522754 | 1.366149 | 0.492176 |
| LRRN2    | 1.029523 | 0.837392 | 1.265736 | 0.782488 |
| SLC30A1  | 1.33132  | 0.988731 | 1.792616 | 0.059389 |
| DCLK2    | 0.809008 | 0.654017 | 1.00073  | 0.050792 |
| ZNF804A  | 0.889885 | 0.762599 | 1.038416 | 0.138523 |
| GPRC5C   | 1.16     | 0.878755 | 1.531257 | 0.294805 |
| TMEM182  | 0.990564 | 0.654985 | 1.498074 | 0.964169 |
| KRT8     | 1.035654 | 0.877107 | 1.222859 | 0.679432 |
| ADORA2B  | 0.851536 | 0.631821 | 1.147655 | 0.291203 |
| MGMT     | 1.194905 | 0.880587 | 1.621416 | 0.252872 |
| METTL7B  | 1.337214 | 1.181315 | 1.513688 | 4.34E-06 |
| NFXL1    | 0.672992 | 0.429486 | 1.054559 | 0.083962 |

|          |          |          |          |          |
|----------|----------|----------|----------|----------|
| DENND5B  | 0.803338 | 0.605501 | 1.065814 | 0.128992 |
| CD14     | 1.081197 | 0.999776 | 1.169249 | 0.05066  |
| DNAJC18  | 0.938525 | 0.685976 | 1.284052 | 0.69159  |
| RALGAPB  | 0.747905 | 0.474678 | 1.178403 | 0.210474 |
| SLC23A1  | 0.92856  | 0.716191 | 1.203901 | 0.575877 |
| KRT72    | 1.088977 | 0.903583 | 1.31241  | 0.370688 |
| KISS1    | 0.396951 | 0.064195 | 2.454545 | 0.320239 |
| NUDT9    | 0.875011 | 0.530285 | 1.443833 | 0.601302 |
| HSD17B13 | 0.624927 | 0.432325 | 0.903334 | 0.012393 |
| PA2G4    | 1.486301 | 0.858351 | 2.573645 | 0.157157 |
| ELOVL6   | 1.09247  | 0.908031 | 1.314373 | 0.348552 |
| PFKFB3   | 1.032577 | 0.797112 | 1.337598 | 0.808188 |
| ARL6IP1  | 0.883844 | 0.572217 | 1.365182 | 0.577774 |
| SERPINB9 | 1.092825 | 0.937932 | 1.273297 | 0.255006 |
| SMAGP    | 0.942835 | 0.704179 | 1.262375 | 0.692625 |
| IRX1     | 0.718506 | 0.5936   | 0.869695 | 0.000692 |
| CDH2     | 0.931478 | 0.758007 | 1.144647 | 0.499612 |
| EMB      | 1.242303 | 0.935186 | 1.650277 | 0.13427  |
| STAT2    | 1.232175 | 0.823707 | 1.843199 | 0.309585 |
| NUDCD2   | 0.844476 | 0.510705 | 1.396383 | 0.510045 |
| IRF2BP1  | 1.088954 | 0.759996 | 1.560298 | 0.642366 |
| HSPA4    | 1.098252 | 0.719559 | 1.676246 | 0.663986 |
| COMMD5   | 1.171974 | 0.729088 | 1.883893 | 0.512291 |
| GTSF1    | 0.992603 | 0.907198 | 1.086048 | 0.871507 |
| DPY19L2P | 0.916021 | 0.705496 | 1.189368 | 0.510313 |
| ZNF16    | 0.897482 | 0.549943 | 1.464648 | 0.665132 |
| ARMC10   | 0.626738 | 0.371301 | 1.057905 | 0.080253 |
| RNF34    | 1.020472 | 0.565631 | 1.841064 | 0.946334 |
| ACYP2    | 0.833158 | 0.413591 | 1.678352 | 0.60947  |
| TRABD    | 1.47734  | 1.138847 | 1.916442 | 0.00329  |
| ATF7     | 1.71693  | 0.849041 | 3.471975 | 0.132457 |
| SOCS6    | 0.753308 | 0.560828 | 1.011848 | 0.059874 |
| ZNF296   | 1.695176 | 1.236313 | 2.324349 | 0.001049 |
| HOXB9    | 1.187616 | 1.045102 | 1.349564 | 0.008381 |
| TTLL6    | 0.857004 | 0.628912 | 1.167819 | 0.328386 |
| POLH     | 1.087165 | 0.668547 | 1.767904 | 0.736204 |
| KIF5B    | 1.026906 | 0.672304 | 1.568541 | 0.902227 |
| AKAP13   | 1.229378 | 0.870689 | 1.735831 | 0.240693 |
| CDCA4    | 1.508692 | 1.00893  | 2.256005 | 0.045148 |
| CHCHD7   | 1.123769 | 0.822794 | 1.534841 | 0.463164 |
| HTRA3    | 1.107597 | 0.981849 | 1.249449 | 0.096503 |
| FOXN2    | 0.971849 | 0.683661 | 1.381519 | 0.873579 |
| LMOD2    | 0.88579  | 0.651819 | 1.203743 | 0.43835  |
| USP32    | 0.744829 | 0.491127 | 1.129587 | 0.165598 |
| CEL      | 1.126138 | 0.893434 | 1.41945  | 0.314486 |
| PPM1D    | 0.796672 | 0.468253 | 1.355434 | 0.401838 |
| GPR27    | 1.061805 | 0.945272 | 1.192705 | 0.311983 |
| KBTBD2   | 0.665435 | 0.403521 | 1.097351 | 0.110497 |
| TRIAP1   | 1.226684 | 0.764716 | 1.967728 | 0.396775 |
| LSM3     | 1.780148 | 1.007742 | 3.144581 | 0.046975 |
| KIAA0232 | 0.939404 | 0.614314 | 1.436529 | 0.773003 |
| MTSS1    | 1.150803 | 0.972325 | 1.362043 | 0.102351 |
| TMEM43   | 1.572957 | 0.932281 | 2.653916 | 0.089655 |
| RNF139   | 0.942591 | 0.605964 | 1.466221 | 0.793104 |
| RPS9     | 1.792417 | 1.140822 | 2.816178 | 0.011358 |
| PLA2G1B  | 0.875839 | 0.623093 | 1.231105 | 0.445378 |
| CYTL1    | 0.884879 | 0.807978 | 0.969099 | 0.008374 |
| TSEN34   | 1.624113 | 1.099929 | 2.398103 | 0.014729 |

|          |          |          |          |          |
|----------|----------|----------|----------|----------|
| TRH      | 0.869485 | 0.802299 | 0.942297 | 0.000653 |
| GSTA4    | 1.094735 | 0.878548 | 1.36412  | 0.420025 |
| NDUFA3   | 1.691706 | 1.004837 | 2.848093 | 0.047915 |
| OSCAR    | 1.073802 | 0.946402 | 1.218351 | 0.269139 |
| PAQR8    | 1.502125 | 1.153664 | 1.955838 | 0.002516 |
| NUDT6    | 1.070529 | 0.725523 | 1.579595 | 0.731317 |
| TANC2    | 1.0719   | 0.85744  | 1.339999 | 0.542126 |
| DNAJC24  | 0.714636 | 0.392643 | 1.300687 | 0.271514 |
| ZNF160   | 0.722405 | 0.484171 | 1.077862 | 0.111226 |
| ZNF415   | 0.934953 | 0.758245 | 1.152842 | 0.529174 |
| CEACAM3  | 1.066774 | 0.905432 | 1.256867 | 0.439766 |
| PDGFD    | 1.170661 | 1.002407 | 1.367155 | 0.046554 |
| S1PR1    | 0.961869 | 0.770899 | 1.200148 | 0.730636 |
| PKIA     | 1.017202 | 0.841677 | 1.229332 | 0.859913 |
| XKR6     | 1.127498 | 0.898095 | 1.415499 | 0.30117  |
| TSNARE1  | 1.08951  | 0.794112 | 1.494793 | 0.59522  |
| FPR2     | 1.102523 | 0.972723 | 1.249644 | 0.126708 |
| FPR1     | 1.096742 | 0.99416  | 1.209909 | 0.06532  |
| FEZ2     | 0.915637 | 0.512917 | 1.634553 | 0.765637 |
| SOX7     | 1.29425  | 0.585049 | 2.863151 | 0.524318 |
| ALK      | 2.02401  | 1.171008 | 3.498369 | 0.011557 |
| MTM1     | 0.724066 | 0.478973 | 1.094575 | 0.125679 |
| INSR     | 0.640133 | 0.486108 | 0.842962 | 0.001491 |
| MFN1     | 0.818941 | 0.485222 | 1.382179 | 0.454479 |
| GIMAP8   | 1.119145 | 0.974106 | 1.28578  | 0.111948 |
| NRTN     | 0.882467 | 0.597614 | 1.303095 | 0.529528 |
| KCNMB3   | 0.781443 | 0.472669 | 1.291927 | 0.33634  |
| FUT3     | 0.887224 | 0.174189 | 4.519029 | 0.885453 |
| ATP6V0E2 | 1.921841 | 1.435065 | 2.573732 | 1.17E-05 |
| PRKCE    | 1.171113 | 0.929715 | 1.47519  | 0.179864 |
| JAGN1    | 1.079087 | 0.687753 | 1.69309  | 0.740499 |
| TADA3    | 1.662595 | 1.130507 | 2.445118 | 0.009787 |
| SOCS5    | 0.992653 | 0.568862 | 1.732158 | 0.979288 |
| C1GALT1C | 1.024522 | 0.650775 | 1.612916 | 0.916671 |
| MORN4    | 1.133575 | 0.877394 | 1.464556 | 0.337439 |
| ZNF672   | 1.763866 | 1.155227 | 2.693169 | 0.008583 |
| ZNF692   | 1.207478 | 0.793706 | 1.836957 | 0.378481 |
| NAIF1    | 1.495294 | 0.853544 | 2.619552 | 0.159607 |
| RBKS     | 1.121071 | 0.83584  | 1.503639 | 0.445514 |
| GRIK1    | 0.803492 | 0.537202 | 1.201782 | 0.286815 |
| TMEM126  | 0.883151 | 0.490717 | 1.58942  | 0.678543 |
| TMEM126I | 0.999785 | 0.533069 | 1.875125 | 0.999467 |
| TRIM8    | 1.536364 | 1.107268 | 2.131748 | 0.010178 |
| NETO2    | 0.988415 | 0.824659 | 1.184689 | 0.899663 |
| CLDN20   | 0.667929 | 0.485837 | 0.918268 | 0.012956 |
| CDC42BPC | 0.960704 | 0.731515 | 1.261699 | 0.773124 |
| SCAND1   | 1.409185 | 1.016461 | 1.953642 | 0.039598 |
| JUNB     | 1.165162 | 0.935212 | 1.451652 | 0.172946 |
| TMEM37   | 0.950637 | 0.699332 | 1.292248 | 0.746555 |
| LRG1     | 1.210149 | 1.024209 | 1.429846 | 0.025026 |
| SHCBP1   | 1.145908 | 0.843493 | 1.556746 | 0.383635 |
| SOSTDC1  | 1.015415 | 0.83561  | 1.233908 | 0.877737 |
| NPTX1    | 1.017521 | 0.748217 | 1.383754 | 0.911828 |
| FAM98B   | 1.183713 | 0.789013 | 1.775858 | 0.415111 |
| ZNF439   | 0.676883 | 0.540206 | 0.848141 | 0.000696 |
| ZNF440   | 0.576134 | 0.391615 | 0.847593 | 0.005119 |
| GAA      | 1.110596 | 0.909437 | 1.356248 | 0.303544 |
| CANT1    | 1.480401 | 0.833661 | 2.62887  | 0.180565 |

|          |          |          |          |          |
|----------|----------|----------|----------|----------|
| ZDHHC16  | 1.30274  | 0.691049 | 2.455874 | 0.413603 |
| CHST11   | 0.739822 | 0.511915 | 1.069195 | 0.108743 |
| EXOSC1   | 1.243128 | 0.573687 | 2.693744 | 0.581227 |
| PGAM1    | 1.438728 | 1.057024 | 1.95827  | 0.020749 |
| CHD7     | 0.828521 | 0.680922 | 1.008115 | 0.060214 |
| ESCO2    | 1.080485 | 0.797459 | 1.463958 | 0.617416 |
| KRT19    | 0.81588  | 0.049754 | 13.37914 | 0.88662  |
| CLCN5    | 1.649196 | 1.312126 | 2.072855 | 1.80E-05 |
| TPPP     | 1.307555 | 0.991644 | 1.724107 | 0.057368 |
| KCND3    | 0.972734 | 0.4473   | 2.115382 | 0.944398 |
| APLN     | 0.854673 | 0.640661 | 1.140174 | 0.285567 |
| PDE7B    | 1.495065 | 1.205381 | 1.854366 | 0.000252 |
| MRPL36   | 1.928983 | 1.112701 | 3.344094 | 0.019264 |
| ZNF581   | 1.126712 | 0.756903 | 1.677203 | 0.556683 |
| NAT1     | 1.511906 | 0.887388 | 2.575944 | 0.128384 |
| GLOD5    | 0.840194 | 0.695399 | 1.015138 | 0.071188 |
| ZNF524   | 1.295892 | 0.904262 | 1.857136 | 0.158005 |
| MCC      | 0.768996 | 0.471774 | 1.253472 | 0.292022 |
| ZBTB26   | 0.942824 | 0.640285 | 1.388316 | 0.76555  |
| DSEL     | 1.06947  | 0.64201  | 1.78154  | 0.796442 |
| POLR1C   | 0.932285 | 0.565215 | 1.537743 | 0.783613 |
| ASXL1    | 0.831851 | 0.508299 | 1.361357 | 0.463845 |
| DLK2     | 1.180298 | 0.745363 | 1.869026 | 0.47967  |
| ZNF562   | 0.69785  | 0.453145 | 1.074701 | 0.102478 |
| ZNF318   | 1.170987 | 0.874199 | 1.568534 | 0.289857 |
| ZNF561   | 1.022487 | 0.663366 | 1.576022 | 0.91976  |
| WIPF2    | 0.926624 | 0.468541 | 1.832566 | 0.826624 |
| HOPX     | 1.228237 | 1.090487 | 1.383387 | 0.000706 |
| LRR8C    | 1.091864 | 0.792169 | 1.504941 | 0.591378 |
| RSL1D1   | 0.933829 | 0.648893 | 1.343882 | 0.712417 |
| LRR8D    | 1.399362 | 0.858196 | 2.28178  | 0.177993 |
| PPID     | 1.277223 | 0.745793 | 2.187332 | 0.372704 |
| COL24A1  | 1.147616 | 0.964875 | 1.364966 | 0.119732 |
| ETFDH    | 1.570879 | 0.894844 | 2.757645 | 0.11572  |
| RXFP1    | 1.06858  | 0.959832 | 1.189649 | 0.225785 |
| LPAR3    | 1.816274 | 1.173846 | 2.810294 | 0.007369 |
| PTGER4   | 1.013766 | 0.821707 | 1.250716 | 0.898482 |
| TBCA     | 0.850017 | 0.509953 | 1.416854 | 0.533056 |
| ECEL1    | 1.004324 | 0.65165  | 1.547866 | 0.984401 |
| BCL2L1   | 1.139377 | 0.859754 | 1.509943 | 0.363774 |
| PLRG1    | 1.085687 | 0.652924 | 1.805288 | 0.751336 |
| ZNF584   | 1.077757 | 0.699322 | 1.66098  | 0.734366 |
| NMUR1    | 1.128801 | 0.950307 | 1.34082  | 0.167716 |
| CLSTN1   | 1.085057 | 0.763036 | 1.542979 | 0.649519 |
| CXXC5    | 1.158636 | 0.896979 | 1.496621 | 0.259548 |
| ZNF274   | 1.058846 | 0.701494 | 1.598239 | 0.785469 |
| PIK3CD   | 1.122785 | 0.775658 | 1.625261 | 0.5394   |
| PTCRA    | 1.051386 | 0.842352 | 1.312293 | 0.657721 |
| SLC25A33 | 0.791109 | 0.515253 | 1.214653 | 0.284132 |
| ENC1     | 1.095238 | 0.891627 | 1.345345 | 0.386002 |
| SPSB1    | 1.053688 | 0.796422 | 1.394057 | 0.714239 |
| P2RY6    | 1.103338 | 0.869182 | 1.400574 | 0.41909  |
| BPTF     | 0.673418 | 0.459452 | 0.987029 | 0.042673 |
| S100Z    | 1.121465 | 0.927671 | 1.355742 | 0.236286 |
| ZIK1     | 1.034338 | 0.809934 | 1.320917 | 0.786722 |
| GPR82    | 0.912638 | 0.665452 | 1.251643 | 0.570558 |
| GPR34    | 0.902941 | 0.740209 | 1.101448 | 0.31395  |
| PLEKHG5  | 1.077773 | 0.785425 | 1.478937 | 0.642709 |

|          |          |          |          |          |
|----------|----------|----------|----------|----------|
| ATF7IP   | 0.859295 | 0.582866 | 1.266823 | 0.443848 |
| RGS19    | 1.632911 | 1.196832 | 2.227881 | 0.001978 |
| TCEA2    | 1.602162 | 1.123423 | 2.284913 | 0.009253 |
| HDAC3    | 1.742402 | 1.015538 | 2.989512 | 0.043806 |
| GPHN     | 0.80094  | 0.658523 | 0.974156 | 0.026278 |
| VAT1L    | 1.121229 | 0.954462 | 1.317135 | 0.163713 |
| TMEM51   | 1.031175 | 0.883125 | 1.204044 | 0.697853 |
| CAMTA1   | 1.247011 | 0.679944 | 2.287005 | 0.475611 |
| LGALS4   | 0.850552 | 0.56792  | 1.273841 | 0.432176 |
| LRRC34   | 0.818833 | 0.601713 | 1.114299 | 0.203553 |
| SPATA5L1 | 1.38166  | 0.715781 | 2.666991 | 0.335322 |
| GATM     | 0.959167 | 0.817372 | 1.12556  | 0.609501 |
| RASGRP4  | 1.295882 | 1.06667  | 1.574348 | 0.009058 |
| SLFNL1   | 0.947538 | 0.687531 | 1.305873 | 0.741945 |
| BCL2     | 0.739439 | 0.571938 | 0.955995 | 0.021259 |
| UTF1     | 1.892716 | 1.479646 | 2.421101 | 3.80E-07 |
| COL8A2   | 1.109173 | 0.923409 | 1.332308 | 0.267891 |
| PWWP2B   | 1.723647 | 1.280434 | 2.320276 | 0.000331 |
| ZNF540   | 0.886519 | 0.594289 | 1.322448 | 0.55499  |
| ANGPTL7  | 0.825419 | 0.571472 | 1.192213 | 0.306417 |
| FBXL14   | 1.077986 | 0.764101 | 1.520814 | 0.668891 |
| EXOSC10  | 1.287624 | 0.751876 | 2.205119 | 0.357055 |
| ZNF570   | 0.863165 | 0.527602 | 1.412151 | 0.557955 |
| NINJ2    | 1.640697 | 1.210091 | 2.224533 | 0.001434 |
| MLLT3    | 1.059149 | 0.905512 | 1.238854 | 0.472343 |
| FAM90A1  | 1.006825 | 0.708421 | 1.430924 | 0.969747 |
| RRM2     | 1.023358 | 0.783083 | 1.337357 | 0.865713 |
| IFNB1    | 1.00446  | 0.496998 | 2.030071 | 0.990109 |
| RPS21    | 1.187532 | 0.818077 | 1.72384  | 0.366033 |
| C3AR1    | 1.090024 | 0.940203 | 1.26372  | 0.25319  |
| PTEN     | 0.866768 | 0.586182 | 1.281662 | 0.473699 |
| RPS7     | 1.042524 | 0.667837 | 1.627428 | 0.854584 |
| RNASEH1  | 1.267837 | 0.678991 | 2.36735  | 0.456367 |
| PRNP     | 1.187343 | 0.891495 | 1.581371 | 0.240222 |
| FRMD5    | 0.920549 | 0.66431  | 1.275626 | 0.618924 |
| CYP4F11  | 0.68485  | 0.512019 | 0.91602  | 0.010739 |
| TLN2     | 1.157625 | 0.798441 | 1.678391 | 0.439938 |
| ZNF217   | 0.972285 | 0.699844 | 1.350783 | 0.86694  |
| SCG2     | 1.155999 | 0.777078 | 1.719691 | 0.474386 |
| ATPAF2   | 0.889461 | 0.517043 | 1.530125 | 0.672137 |
| CYP4F22  | 1.105969 | 0.84464  | 1.448153 | 0.463968 |
| PPIH     | 1.311872 | 0.614878 | 2.798941 | 0.482616 |
| ZNF57    | 0.383182 | 0.215684 | 0.680756 | 0.00107  |
| JMJD1C   | 1.121085 | 0.820182 | 1.532382 | 0.473499 |
| SYNPO    | 0.978482 | 0.68629  | 1.395076 | 0.904323 |
| MAL      | 1.051749 | 0.877048 | 1.261249 | 0.586165 |
| ZNF554   | 0.653631 | 0.413816 | 1.032423 | 0.06828  |
| RAB33B   | 1.172232 | 0.746584 | 1.840556 | 0.489973 |
| THOP1    | 1.382629 | 0.941524 | 2.030392 | 0.098411 |
| LAMB2    | 0.954045 | 0.862058 | 1.055848 | 0.363125 |
| USP19    | 1.165459 | 0.729926 | 1.860866 | 0.521302 |
| ORMDL3   | 0.796543 | 0.570652 | 1.111852 | 0.181272 |
| KLF11    | 1.166087 | 0.994618 | 1.367118 | 0.058297 |
| SMN1     | 0.484627 | 0.297487 | 0.78949  | 0.003623 |
| EIF2AK3  | 0.657133 | 0.416133 | 1.037705 | 0.071673 |
| KRCC1    | 0.854898 | 0.601465 | 1.215116 | 0.382179 |
| NME6     | 0.85609  | 0.5523   | 1.326976 | 0.487152 |
| CYCS     | 1.135821 | 0.750468 | 1.719047 | 0.546956 |

|         |          |          |          |          |
|---------|----------|----------|----------|----------|
| CD8B    | 1.027591 | 0.760292 | 1.388867 | 0.859455 |
| SLFN12  | 1.030984 | 0.835006 | 1.272957 | 0.776667 |
| FRMD3   | 0.998402 | 0.834011 | 1.195196 | 0.986101 |
| SNTB1   | 0.994142 | 0.700889 | 1.410094 | 0.973721 |
| MTBP    | 0.685401 | 0.440661 | 1.066069 | 0.09372  |
| MRPL13  | 1.507726 | 0.903416 | 2.51627  | 0.116119 |
| MALT1   | 1.168591 | 0.81673  | 1.672041 | 0.394005 |
| PRL     | 1.28635  | 1.012979 | 1.633495 | 0.038851 |
| ISG20   | 1.344834 | 1.055983 | 1.712697 | 0.016328 |
| MBOAT1  | 0.846892 | 0.57173  | 1.254484 | 0.407117 |
| GPR22   | 0.838121 | 0.61702  | 1.138451 | 0.258422 |
| CXCR6   | 0.781581 | 0.553807 | 1.103036 | 0.160904 |
| CEBPB   | 1.287777 | 1.076561 | 1.540433 | 0.005656 |
| AZU1    | 0.945107 | 0.879276 | 1.015868 | 0.125377 |
| TPSAB1  | 0.906267 | 0.825437 | 0.995011 | 0.038933 |
| PAIP1   | 0.847971 | 0.49367  | 1.456548 | 0.550197 |
| CLEC7A  | 1.126302 | 1.022807 | 1.24027  | 0.015584 |
| C1QTNF4 | 0.98411  | 0.890871 | 1.087107 | 0.752459 |
| SERHL   | 1.385532 | 0.856991 | 2.240045 | 0.183405 |
| NEGR1   | 0.979296 | 0.869171 | 1.103374 | 0.731046 |
| ZNF131  | 0.967726 | 0.515777 | 1.815696 | 0.918614 |
| MACROD2 | 1.071178 | 0.797024 | 1.439633 | 0.648491 |
| DPAGT1  | 1.49778  | 0.858533 | 2.612999 | 0.154802 |
| BSG     | 0.902751 | 0.656821 | 1.240764 | 0.528369 |
| HINFP   | 0.927541 | 0.540179 | 1.592681 | 0.785094 |
| SPTLC3  | 0.835001 | 0.679406 | 1.02623  | 0.086552 |
| TP53RK  | 1.15321  | 0.76227  | 1.744649 | 0.49977  |
| CLEC12A | 1.032177 | 0.864    | 1.23309  | 0.727082 |
| BPGM    | 0.848887 | 0.645866 | 1.115725 | 0.240094 |
| POP7    | 1.556702 | 0.971437 | 2.494575 | 0.06584  |
| ALG14   | 1.340055 | 0.650076 | 2.762368 | 0.427726 |
| SUCLG2  | 1.240184 | 1.041746 | 1.476423 | 0.015534 |
| STARD5  | 1.206514 | 0.668086 | 2.178877 | 0.5336   |
| CSDC2   | 1.4904   | 0.79243  | 2.803138 | 0.215673 |
| IL16    | 1.20139  | 0.849331 | 1.699381 | 0.299742 |
| GNB2    | 1.287683 | 0.912442 | 1.81724  | 0.15026  |
| PDZD3   | 1.009075 | 0.607738 | 1.675445 | 0.972143 |
| C2CD2L  | 1.318784 | 0.899154 | 1.934253 | 0.156777 |
| GNG12   | 1.017963 | 0.68744  | 1.5074   | 0.929176 |
| PRSS27  | 1.027738 | 0.645782 | 1.635607 | 0.908122 |
| DNAJB7  | 0.56641  | 0.299221 | 1.072187 | 0.080831 |
| CLP1    | 1.537701 | 0.836756 | 2.825824 | 0.16577  |
| TTC36   | 0.804955 | 0.610652 | 1.061085 | 0.123729 |
| RSPH9   | 1.6849   | 0.965106 | 2.941532 | 0.066501 |
| GTPBP2  | 1.267054 | 0.81698  | 1.965075 | 0.290444 |
| FGGY    | 1.183564 | 0.665892 | 2.103681 | 0.565765 |
| IL17D   | 0.692116 | 0.395722 | 1.210509 | 0.196985 |
| TCEAL1  | 0.854583 | 0.545573 | 1.338614 | 0.492528 |
| ZNF24   | 0.903288 | 0.608171 | 1.341613 | 0.614298 |
| MANEA   | 0.969082 | 0.680714 | 1.379612 | 0.861652 |
| AGXT    | 0.961758 | 0.752922 | 1.228518 | 0.754898 |
| AFF1    | 1.097966 | 0.739543 | 1.630098 | 0.642989 |
| ACOT12  | 0.91757  | 0.469803 | 1.792102 | 0.801138 |
| FIBP    | 2.913425 | 1.852129 | 4.582861 | 3.72E-06 |
| BANP    | 0.973802 | 0.557474 | 1.70105  | 0.92568  |
| PPP1CA  | 1.706156 | 1.139492 | 2.554618 | 0.009486 |
| HCFC1   | 1.144164 | 0.789258 | 1.658661 | 0.477189 |
| CTSW    | 0.971408 | 0.864738 | 1.091238 | 0.624997 |



|          |          |          |          |          |
|----------|----------|----------|----------|----------|
| NIPAL4   | 0.765513 | 0.380782 | 1.538966 | 0.453272 |
| PDE3A    | 1.015384 | 0.734478 | 1.403723 | 0.926387 |
| RASGRP1  | 0.957962 | 0.743723 | 1.233915 | 0.739495 |
| KLHL6    | 1.154149 | 0.813859 | 1.63672  | 0.421192 |
| CHCHD1   | 1.930789 | 1.022712 | 3.645157 | 0.042435 |
| MRPL52   | 1.37502  | 0.741559 | 2.549602 | 0.312074 |
| SMPDL3A  | 1.123651 | 0.972766 | 1.29794  | 0.113045 |
| RND1     | 1.968757 | 0.958279 | 4.044755 | 0.065189 |
| RAD9A    | 1.127388 | 0.746831 | 1.701863 | 0.568233 |
| EFEMP2   | 0.764367 | 0.585946 | 0.997117 | 0.047563 |
| OR10AD1  | 1.543213 | 0.977444 | 2.436463 | 0.062596 |
| TMEM134  | 0.879808 | 0.559835 | 1.382661 | 0.57877  |
| ZMAT3    | 0.749098 | 0.589302 | 0.952225 | 0.018282 |
| ZNF738   | 0.684357 | 0.476334 | 0.983227 | 0.040223 |
| SLFN11   | 0.908528 | 0.735137 | 1.122815 | 0.374622 |
| CORO1B   | 1.037855 | 0.760916 | 1.415589 | 0.8145   |
| FUT10    | 0.909801 | 0.702609 | 1.17809  | 0.473411 |
| LRRC20   | 1.407729 | 1.085904 | 1.824932 | 0.009815 |
| MUS81    | 1.401716 | 0.877761 | 2.238431 | 0.157355 |
| TMEM217  | 1.290219 | 1.043699 | 1.594966 | 0.018507 |
| ZNF596   | 0.666751 | 0.394718 | 1.126266 | 0.129668 |
| CFL1     | 2.190713 | 1.474164 | 3.255555 | 0.000104 |
| TMCC1    | 0.782437 | 0.414806 | 1.475889 | 0.448608 |
| RAB43    | 0.844952 | 0.578623 | 1.233866 | 0.383148 |
| CBWD1    | 0.651734 | 0.366244 | 1.159763 | 0.145414 |
| RAB37    | 1.200933 | 0.956877 | 1.507237 | 0.114184 |
| DCP2     | 0.612046 | 0.431843 | 0.867446 | 0.005795 |
| SNX32    | 1.30904  | 0.914954 | 1.872865 | 0.140589 |
| RPL38    | 0.935734 | 0.575355 | 1.521838 | 0.788938 |
| CYP7B1   | 1.127899 | 0.999708 | 1.272528 | 0.050557 |
| RARG     | 1.631184 | 1.250068 | 2.128493 | 0.000313 |
| CES3     | 1.100829 | 0.888012 | 1.364648 | 0.380811 |
| SSH3     | 1.006745 | 0.724757 | 1.398449 | 0.96802  |
| CES2     | 1.343289 | 0.784463 | 2.300204 | 0.282201 |
| PDP2     | 1.00207  | 0.694424 | 1.446009 | 0.991184 |
| SP3      | 0.57668  | 0.336769 | 0.987504 | 0.044879 |
| DMXL1    | 0.726724 | 0.505636 | 1.044482 | 0.084563 |
| ZNF621   | 0.960987 | 0.632524 | 1.460018 | 0.852067 |
| EGFL7    | 1.056689 | 0.925026 | 1.207092 | 0.416719 |
| NADSYN1  | 0.857279 | 0.578484 | 1.270437 | 0.442905 |
| DHCR7    | 1.089179 | 0.868188 | 1.366423 | 0.460323 |
| NBEA     | 0.887516 | 0.700697 | 1.124145 | 0.322397 |
| RNASEH2C | 1.331232 | 0.937485 | 1.890353 | 0.109788 |
| MYEOV    | 2.248536 | 1.026405 | 4.925846 | 0.042857 |
| ANKRD13I | 0.95189  | 0.708189 | 1.279454 | 0.743847 |
| MYD88    | 1.218145 | 0.921894 | 1.609595 | 0.165152 |
| MRGPRD   | 0.745909 | 0.328827 | 1.692012 | 0.482999 |
| OXSR1    | 0.862275 | 0.517131 | 1.437776 | 0.570003 |
| SLC22A13 | 0.987802 | 0.532217 | 1.833376 | 0.968974 |
| PHF8     | 0.809912 | 0.477796 | 1.372883 | 0.433632 |
| LCLAT1   | 1.166256 | 0.726053 | 1.873351 | 0.524749 |
| KAT5     | 1.288994 | 0.759644 | 2.187217 | 0.346714 |
| SH3RF3   | 1.031876 | 0.832222 | 1.279428 | 0.774877 |
| GXYLT2   | 0.737726 | 0.585929 | 0.928851 | 0.009656 |
| HPSE2    | 1.126565 | 0.81954  | 1.54861  | 0.462898 |
| DCAKD    | 1.069495 | 0.669691 | 1.70798  | 0.778482 |
| TADA2B   | 1.139293 | 0.754103 | 1.721235 | 0.535637 |
| CCDC96   | 0.972318 | 0.603177 | 1.56737  | 0.908259 |

|          |          |          |          |          |
|----------|----------|----------|----------|----------|
| RELA     | 1.544493 | 0.924026 | 2.581592 | 0.097217 |
| EVC2     | 0.972725 | 0.77493  | 1.221005 | 0.811551 |
| ZNF680   | 0.608533 | 0.437369 | 0.846683 | 0.003202 |
| RXFP4    | 0.88313  | 0.68625  | 1.136492 | 0.33417  |
| HPSE     | 1.126318 | 0.95731  | 1.325164 | 0.151566 |
| COQ2     | 0.833328 | 0.490556 | 1.415611 | 0.500059 |
| HSPA6    | 1.190135 | 0.99444  | 1.424339 | 0.057546 |
| TRMT112  | 1.77603  | 1.163913 | 2.710065 | 0.007723 |
| LRRN3    | 0.701206 | 0.483466 | 1.017011 | 0.061339 |
| ADCK5    | 1.201595 | 0.843923 | 1.710856 | 0.308351 |
| NOC3L    | 1.086849 | 0.771485 | 1.531125 | 0.633875 |
| ESRRA    | 1.576025 | 1.080754 | 2.298259 | 0.018106 |
| COMMD1   | 1.276333 | 0.651126 | 2.501859 | 0.477379 |
| RAPH1    | 1.005658 | 0.591378 | 1.710157 | 0.983383 |
| MTX1     | 2.305575 | 1.317557 | 4.034492 | 0.003434 |
| PARP14   | 1.313925 | 1.012529 | 1.705036 | 0.040012 |
| CYSLTR1  | 1.19446  | 0.9005   | 1.584381 | 0.217639 |
| PARP15   | 1.261351 | 0.962278 | 1.653376 | 0.092668 |
| CKS1B    | 1.330944 | 0.897416 | 1.973904 | 0.15511  |
| ABCD2    | 1.126752 | 0.775103 | 1.637938 | 0.531816 |
| ABLIM3   | 1.260366 | 1.025709 | 1.548708 | 0.027704 |
| VANGL1   | 0.975732 | 0.801051 | 1.188503 | 0.807153 |
| GLRX     | 0.983091 | 0.672851 | 1.436377 | 0.929756 |
| IQCB1    | 0.976859 | 0.614272 | 1.553469 | 0.921202 |
| GOLGB1   | 0.82358  | 0.573314 | 1.183093 | 0.293616 |
| ZNF483   | 0.513672 | 0.284429 | 0.927681 | 0.027184 |
| PLAC8L1  | 0.944449 | 0.53063  | 1.680989 | 0.845944 |
| SLC2A14  | 1.064597 | 0.835652 | 1.356265 | 0.612381 |
| GPR137   | 1.488989 | 0.984283 | 2.25249  | 0.059436 |
| SNCG     | 1.943668 | 1.145656 | 3.29754  | 0.013734 |
| MMRN2    | 0.904806 | 0.609157 | 1.343947 | 0.620208 |
| TNKS     | 0.795839 | 0.518922 | 1.220529 | 0.29528  |
| ZNF449   | 1.240618 | 0.798567 | 1.927368 | 0.33744  |
| PPP1R3B  | 0.943702 | 0.682841 | 1.304218 | 0.725578 |
| STOX2    | 0.642938 | 0.487601 | 0.847763 | 0.001745 |
| MAP3K11  | 1.731741 | 1.190357 | 2.519351 | 0.004092 |
| TRIB1    | 1.190588 | 0.994649 | 1.425126 | 0.057239 |
| KCNK7    | 1.031307 | 0.724171 | 1.468707 | 0.864307 |
| C1QB     | 1.051665 | 0.948667 | 1.165846 | 0.338113 |
| C1QA     | 1.087112 | 0.983159 | 1.202055 | 0.103363 |
| OLR1     | 1.035213 | 0.877469 | 1.221314 | 0.681599 |
| GLIPR1L1 | 1.015987 | 0.753117 | 1.370608 | 0.917306 |
| DAG1     | 1.249469 | 0.920222 | 1.696518 | 0.153523 |
| ARV1     | 1.060775 | 0.658886 | 1.707797 | 0.808136 |
| SAA1     | 0.849024 | 0.433432 | 1.663101 | 0.633286 |
| EHBP1L1  | 1.618046 | 1.222739 | 2.141155 | 0.00076  |
| THAP2    | 1.069637 | 0.722935 | 1.58261  | 0.736266 |
| RNF26    | 1.522263 | 0.956521 | 2.422617 | 0.076319 |
| PPP1R14B | 1.29425  | 0.923659 | 1.81353  | 0.133983 |
| SMARCC1  | 0.674283 | 0.454307 | 1.000771 | 0.050449 |
| ZNF417   | 0.873253 | 0.590713 | 1.290932 | 0.496786 |
| PTPRM    | 1.02877  | 0.889844 | 1.189386 | 0.701568 |
| FKBP2    | 1.328711 | 0.684844 | 2.577918 | 0.400646 |
| VEGFB    | 1.135156 | 0.794062 | 1.62277  | 0.486885 |
| TNFRSF10 | 0.919787 | 0.684353 | 1.236216 | 0.579397 |
| MST1     | 0.791312 | 0.630519 | 0.993109 | 0.043422 |
| TNFRSF10 | 1.029423 | 0.859708 | 1.232643 | 0.752401 |
| GMPPB    | 1.057209 | 0.708542 | 1.577452 | 0.78526  |

|          |          |          |          |          |
|----------|----------|----------|----------|----------|
| ZNF622   | 1.415641 | 0.830684 | 2.412518 | 0.201274 |
| CSPG4    | 1.342943 | 1.094641 | 1.647569 | 0.0047   |
| SNX33    | 0.963774 | 0.757407 | 1.226369 | 0.764075 |
| CHD2     | 0.930023 | 0.503672 | 1.717275 | 0.816658 |
| CCDC106  | 1.219002 | 0.947102 | 1.56896  | 0.124074 |
| CCR9     | 1.026163 | 0.73341  | 1.435773 | 0.880205 |
| SULT1B1  | 0.985169 | 0.820862 | 1.182365 | 0.872481 |
| NUDT4    | 0.787027 | 0.487399 | 1.27085  | 0.32729  |
| PC       | 0.977724 | 0.767032 | 1.246291 | 0.855641 |
| NMNAT1   | 1.460339 | 0.911839 | 2.338779 | 0.115053 |
| LRFN4    | 0.96941  | 0.78879  | 1.191388 | 0.767745 |
| SLC19A1  | 1.184429 | 0.779447 | 1.79983  | 0.427876 |
| HSPB7    | 1.78693  | 1.14204  | 2.795978 | 0.01104  |
| RCE1     | 1.105304 | 0.743945 | 1.642187 | 0.620141 |
| UQCRH    | 1.568509 | 0.897654 | 2.740724 | 0.113927 |
| TAS1R1   | 0.735142 | 0.441751 | 1.223392 | 0.236389 |
| EIF1AX   | 1.03043  | 0.680079 | 1.561268 | 0.88756  |
| PSMD1    | 1.728019 | 0.926134 | 3.224208 | 0.085646 |
| SUSD5    | 0.736732 | 0.352691 | 1.53895  | 0.416258 |
| HEG1     | 1.094513 | 0.895042 | 1.338438 | 0.378986 |
| TOMM20   | 1.024268 | 0.677753 | 1.547945 | 0.909392 |
| AGFG1    | 0.967207 | 0.656264 | 1.425478 | 0.866195 |
| STAT5B   | 0.673565 | 0.466143 | 0.973283 | 0.035365 |
| CD7      | 1.024983 | 0.883303 | 1.189389 | 0.745095 |
| CNP      | 1.01375  | 0.557372 | 1.843811 | 0.96431  |
| JUP      | 0.919447 | 0.800645 | 1.055877 | 0.234157 |
| HAP1     | 1.119925 | 0.265142 | 4.730404 | 0.877548 |
| EIF1     | 1.107699 | 0.676026 | 1.815017 | 0.68476  |
| RNF213   | 1.165437 | 0.856799 | 1.585254 | 0.32939  |
| TIGD3    | 1.15561  | 0.74835  | 1.784505 | 0.514159 |
| PLK3     | 1.21032  | 0.912512 | 1.60532  | 0.185294 |
| NET1     | 1.196188 | 0.936741 | 1.527493 | 0.150977 |
| DPY19L1  | 0.749388 | 0.555329 | 1.011261 | 0.059197 |
| PHOSPHO  | 1.08063  | 0.914171 | 1.277399 | 0.363587 |
| ZNF791   | 0.837919 | 0.432026 | 1.625153 | 0.600833 |
| PHC3     | 0.646226 | 0.409793 | 1.019072 | 0.060289 |
| GPR160   | 1.076064 | 0.839127 | 1.379902 | 0.563443 |
| CBX2     | 0.853783 | 0.736254 | 0.990074 | 0.03644  |
| SPTBN2   | 0.782226 | 0.581618 | 1.052026 | 0.104268 |
| GOLIM4   | 1.174827 | 0.846393 | 1.630706 | 0.335501 |
| RBM4B    | 0.695985 | 0.409286 | 1.183513 | 0.180908 |
| HOXB2    | 1.174845 | 1.043985 | 1.322108 | 0.007487 |
| SLCO4C1  | 1.043938 | 0.892111 | 1.221604 | 0.591791 |
| RBM4     | 0.574249 | 0.354501 | 0.930214 | 0.024202 |
| UBXN2A   | 0.688282 | 0.438929 | 1.079291 | 0.103627 |
| RAX2     | 0.278111 | 0.07436  | 1.040153 | 0.05724  |
| TCAP     | 0.889747 | 0.618054 | 1.280875 | 0.529752 |
| CCS      | 1.33741  | 0.977932 | 1.829027 | 0.06872  |
| KLHL15   | 0.834097 | 0.553021 | 1.258032 | 0.386942 |
| FBXO45   | 1.178513 | 0.79445  | 1.748244 | 0.414306 |
| NGG5     | 1.037385 | 0.705089 | 1.526288 | 0.852209 |
| SLC25A30 | 0.995242 | 0.710699 | 1.393709 | 0.977855 |
| CD34     | 1.01811  | 0.945256 | 1.09658  | 0.635652 |
| CTSF     | 0.94084  | 0.804231 | 1.100653 | 0.446153 |
| MSRB3    | 0.934999 | 0.780333 | 1.12032  | 0.466313 |
| LEMD3    | 1.09969  | 0.665366 | 1.817525 | 0.710868 |
| TLR10    | 1.049178 | 0.843179 | 1.305506 | 0.66686  |
| TLR1     | 1.063916 | 0.873208 | 1.296275 | 0.538732 |

|          |          |          |          |          |
|----------|----------|----------|----------|----------|
| TLR6     | 1.199534 | 0.988038 | 1.456303 | 0.066009 |
| FAM174A  | 0.839832 | 0.468847 | 1.504367 | 0.557272 |
| RGMB     | 1.201474 | 0.344815 | 4.186426 | 0.773199 |
| FAM53A   | 1.081513 | 0.621371 | 1.882405 | 0.781676 |
| CYB561D1 | 0.857118 | 0.549055 | 1.338028 | 0.497456 |
| ZDHHC24  | 0.799994 | 0.515388 | 1.241762 | 0.319864 |
| SELP     | 1.096066 | 0.938769 | 1.27972  | 0.245829 |
| CTU2     | 1.329783 | 0.835588 | 2.11626  | 0.229256 |
| MGA      | 0.688072 | 0.490793 | 0.964651 | 0.030103 |
| ARL13A   | 0.681342 | 0.453827 | 1.022914 | 0.064215 |
| PIGG     | 0.911591 | 0.609301 | 1.363856 | 0.652486 |
| PRPF8    | 1.111672 | 0.755452 | 1.63586  | 0.591184 |
| ADCY6    | 1.080335 | 0.922317 | 1.265425 | 0.338213 |
| PITPNA   | 1.502355 | 0.923925 | 2.442915 | 0.100803 |
| DDX23    | 1.684153 | 0.937749 | 3.024657 | 0.081016 |
| ZNHIT2   | 1.51879  | 0.99545  | 2.317267 | 0.052525 |
| ZBTB4    | 1.194842 | 0.7739   | 1.844744 | 0.421792 |
| TNK1     | 1.112877 | 0.86955  | 1.424293 | 0.395559 |
| ZHX3     | 1.339339 | 0.955271 | 1.877823 | 0.090158 |
| PHLDA3   | 0.951103 | 0.735962 | 1.229135 | 0.7016   |
| SLC16A11 | 1.334094 | 0.837587 | 2.124921 | 0.224856 |
| SLC16A13 | 1.479944 | 1.053488 | 2.079031 | 0.023795 |
| STAG3L3  | 0.628037 | 0.453182 | 0.870358 | 0.005206 |
| SLC6A19  | 1.094093 | 0.868786 | 1.37783  | 0.444649 |
| SNHG11   | 1.266108 | 0.823565 | 1.946451 | 0.282235 |
| EXO1     | 1.181707 | 0.878395 | 1.589753 | 0.269931 |
| RALGAP1  | 0.521332 | 0.308582 | 0.880764 | 0.014912 |
| LIG4     | 1.057593 | 0.728673 | 1.534985 | 0.768294 |
| GTF2IRD2 | 0.813002 | 0.453214 | 1.458411 | 0.487465 |
| ABRA     | 1.127516 | 0.74551  | 1.705267 | 0.569632 |
| ATP2A2   | 0.881131 | 0.58123  | 1.335771 | 0.551076 |
| ZWILCH   | 1.228088 | 0.775562 | 1.944654 | 0.38096  |
| RPL4     | 1.221576 | 0.83378  | 1.789739 | 0.304381 |
| SNAPC5   | 1.416045 | 0.753603 | 2.660794 | 0.279725 |
| ZCCHC12  | 0.361798 | 0.080964 | 1.616745 | 0.183185 |
| GALNTL6  | 0.767463 | 0.423729 | 1.390037 | 0.382502 |
| LINGO2   | 1.351921 | 0.555962 | 3.287438 | 0.505997 |
| BBS1     | 0.534941 | 0.294423 | 0.971939 | 0.040035 |
| DENND4A  | 0.838517 | 0.540192 | 1.301595 | 0.432431 |
| PELI3    | 1.446866 | 1.099042 | 1.904768 | 0.00846  |
| TTC9B    | 1.035905 | 0.514347 | 2.086334 | 0.921336 |
| MYO1H    | 0.878318 | 0.344376 | 2.240119 | 0.785924 |
| TMEM81   | 1.151616 | 0.650883 | 2.037568 | 0.627747 |
| MRPL11   | 2.189973 | 1.26617  | 3.787784 | 0.005044 |
| IL20RB   | 0.926763 | 0.577886 | 1.486262 | 0.752299 |
| AKIRIN1  | 0.981194 | 0.532194 | 1.809005 | 0.951498 |
| MSL2     | 0.588137 | 0.347802 | 0.994545 | 0.047662 |
| ZNF497   | 0.762576 | 0.556571 | 1.044832 | 0.091602 |
| CMKLR1   | 1.179463 | 0.990732 | 1.404147 | 0.063552 |
| ANGEL2   | 0.713226 | 0.418861 | 1.214463 | 0.213324 |
| UGT8     | 0.828831 | 0.572656 | 1.199605 | 0.319633 |
| KY       | 0.92326  | 0.639257 | 1.333437 | 0.670322 |
| IQCK     | 0.743557 | 0.456028 | 1.212376 | 0.234872 |
| ZNF266   | 0.98309  | 0.70587  | 1.369183 | 0.919627 |
| SLC29A2  | 1.330376 | 1.104926 | 1.601826 | 0.002585 |
| BRSK2    | 0.792931 | 0.465885 | 1.34956  | 0.392486 |
| TMEM167  | 1.080311 | 0.770994 | 1.513723 | 0.653546 |
| SH3PXD2E | 1.056894 | 0.878316 | 1.271781 | 0.557893 |

|          |          |          |          |          |
|----------|----------|----------|----------|----------|
| LARP7    | 1.120698 | 0.69165  | 1.815896 | 0.643536 |
| FGFBP3   | 1.281223 | 0.793628 | 2.06839  | 0.310535 |
| NR1D2    | 0.834658 | 0.621528 | 1.120873 | 0.229584 |
| BRMS1    | 1.605826 | 1.002256 | 2.572871 | 0.048915 |
| RPL15    | 0.895444 | 0.555036 | 1.444628 | 0.650872 |
| HRAS     | 1.188112 | 0.863049 | 1.635606 | 0.290567 |
| WDR49    | 1.283634 | 1.105561 | 1.490389 | 0.001049 |
| SRP72    | 0.924449 | 0.576517 | 1.482359 | 0.744368 |
| PCP2     | 1.234558 | 0.895923 | 1.701188 | 0.197704 |
| RIN1     | 1.117991 | 0.915355 | 1.365485 | 0.274335 |
| THAP6    | 0.802149 | 0.50546  | 1.272985 | 0.349467 |
| CEP135   | 1.016778 | 0.697705 | 1.481769 | 0.930994 |
| FZD4     | 1.016152 | 0.627932 | 1.64439  | 0.94798  |
| CD248    | 1.063139 | 0.858481 | 1.316587 | 0.57464  |
| PDZK1    | 0.686167 | 0.429366 | 1.096558 | 0.115348 |
| PDE12    | 1.080138 | 0.626412 | 1.862507 | 0.781539 |
| GLMN     | 0.719734 | 0.478116 | 1.083456 | 0.115054 |
| YIF1A    | 1.284494 | 0.865925 | 1.90539  | 0.213341 |
| CNIH2    | 1.170694 | 0.822515 | 1.66626  | 0.38154  |
| NLRP6    | 1.042511 | 0.79105  | 1.373907 | 0.767523 |
| NDUFA11  | 1.049605 | 0.659488 | 1.670492 | 0.838204 |
| RSRC1    | 0.557615 | 0.329175 | 0.944587 | 0.02986  |
| RAB1B    | 1.72369  | 1.196683 | 2.482786 | 0.003452 |
| PTDSS2   | 0.960959 | 0.654011 | 1.411966 | 0.839262 |
| SEZ6L2   | 0.867353 | 0.632599 | 1.189223 | 0.37683  |
| ASPHD1   | 0.630826 | 0.311162 | 1.278889 | 0.201339 |
| KCTD13   | 0.915824 | 0.471698 | 1.778115 | 0.795054 |
| P2RY14   | 1.112013 | 0.955465 | 1.294211 | 0.170227 |
| AMZ1     | 1.008875 | 0.756194 | 1.345989 | 0.9521   |
| GPR171   | 0.972546 | 0.78344  | 1.207297 | 0.800778 |
| FUT1     | 0.747065 | 0.567047 | 0.984232 | 0.038177 |
| DHX36    | 0.588564 | 0.366038 | 0.946371 | 0.028711 |
| FBXW8    | 0.942361 | 0.617747 | 1.437554 | 0.782914 |
| KLC2     | 1.363131 | 0.991368 | 1.874305 | 0.056572 |
| SLC22A1  | 1.862174 | 1.136552 | 3.051065 | 0.013585 |
| CTBP2    | 1.320239 | 0.853034 | 2.04333  | 0.212521 |
| CHST2    | 1.019311 | 0.832838 | 1.247534 | 0.852804 |
| ZDHHC14  | 0.814418 | 0.571666 | 1.160253 | 0.255612 |
| ATR      | 0.667684 | 0.449877 | 0.990943 | 0.044949 |
| UBE2C    | 0.905427 | 0.693971 | 1.181314 | 0.464109 |
| GK5      | 0.770619 | 0.492794 | 1.205073 | 0.25336  |
| VCPIP1   | 1.031864 | 0.658261 | 1.617511 | 0.891216 |
| DES      | 1.126651 | 0.901101 | 1.408656 | 0.295434 |
| PDIK1L   | 0.895246 | 0.611327 | 1.311028 | 0.569663 |
| RAG2     | 1.050233 | 0.811624 | 1.358991 | 0.709355 |
| TRAF6    | 1.170987 | 0.663613 | 2.066279 | 0.585915 |
| ZNF654   | 1.023752 | 0.671308 | 1.561232 | 0.913184 |
| MRPS22   | 0.725959 | 0.416054 | 1.266702 | 0.259496 |
| PACS1    | 1.180527 | 0.768064 | 1.81449  | 0.449209 |
| WFDC5    | 0.638412 | 0.229255 | 1.777803 | 0.390432 |
| MARCKSL1 | 0.806258 | 0.663594 | 0.979593 | 0.030198 |
| SH3BP5L  | 1.379043 | 0.85191  | 2.232347 | 0.190946 |
| YPEL2    | 0.863992 | 0.61211  | 1.219523 | 0.405769 |
| ABO      | 1.090867 | 0.98735  | 1.205237 | 0.087321 |
| PSMD2    | 1.612741 | 0.97292  | 2.673328 | 0.063811 |
| FAM131A  | 0.996376 | 0.651635 | 1.5235   | 0.98663  |
| CSRP2    | 1.004516 | 0.812766 | 1.241505 | 0.966743 |
| INHBC    | 1.007574 | 0.632109 | 1.606058 | 0.974697 |

|          |          |          |          |          |
|----------|----------|----------|----------|----------|
| PARL     | 0.73606  | 0.453513 | 1.19464  | 0.214899 |
| DDIT3    | 1.119021 | 0.872698 | 1.434871 | 0.375338 |
| PCCA     | 1.029842 | 0.831851 | 1.274957 | 0.78721  |
| DCTN2    | 2.749812 | 1.400299 | 5.399897 | 0.003305 |
| NPPA     | 1.277528 | 0.781369 | 2.088742 | 0.32885  |
| ZNF408   | 1.051538 | 0.746058 | 1.482101 | 0.774122 |
| CTDSP2   | 1.107515 | 0.739899 | 1.65778  | 0.61975  |
| CKAP5    | 0.908484 | 0.62169  | 1.327579 | 0.619962 |
| ARHGAP1  | 1.302409 | 0.864364 | 1.962448 | 0.206544 |
| MED16    | 1.090828 | 0.780198 | 1.525135 | 0.61116  |
| GOLGA8A  | 1.045187 | 0.902548 | 1.210368 | 0.554953 |
| TP53I11  | 1.162619 | 0.967973 | 1.396405 | 0.107013 |
| DOLK     | 1.777718 | 1.138941 | 2.774752 | 0.01132  |
| PHYHD1   | 0.837164 | 0.647996 | 1.081555 | 0.173817 |
| CATSPER1 | 1.02336  | 0.804311 | 1.302066 | 0.850951 |
| CCNE2    | 0.924716 | 0.625881 | 1.366235 | 0.69431  |
| CST6     | 0.833743 | 0.560982 | 1.239126 | 0.368433 |
| ZNF519   | 0.746288 | 0.475338 | 1.171685 | 0.203539 |
| LSM1     | 1.794141 | 0.899934 | 3.576863 | 0.096822 |
| BANF1    | 1.402467 | 0.902661 | 2.179018 | 0.132464 |
| APOF     | 0.782054 | 0.193172 | 3.166143 | 0.730422 |
| TMEM9B   | 1.536848 | 0.91235  | 2.58881  | 0.106271 |
| NRIP3    | 0.998078 | 0.809929 | 1.229934 | 0.985599 |
| PTPN2    | 1.011728 | 0.574307 | 1.782313 | 0.967807 |
| EIF1AD   | 1.209186 | 0.61175  | 2.390078 | 0.584807 |
| SMAD2    | 0.72515  | 0.436512 | 1.204647 | 0.214606 |
| EIF3F    | 0.981162 | 0.525793 | 1.830908 | 0.952354 |
| ZNF25    | 0.745356 | 0.488809 | 1.136551 | 0.17215  |
| ARL10    | 0.968199 | 0.793269 | 1.181705 | 0.750595 |
| CLTB     | 1.738019 | 1.200602 | 2.515995 | 0.003405 |
| LPL      | 1.117198 | 0.965535 | 1.292683 | 0.136541 |
| RFESD    | 0.707465 | 0.49172  | 1.017871 | 0.062247 |
| CCDC14   | 0.86009  | 0.614299 | 1.204225 | 0.380093 |
| TBC1D10C | 1.201522 | 0.864729 | 1.66949  | 0.273981 |
| SART1    | 1.775557 | 1.068783 | 2.949713 | 0.026635 |
| PPP2R2D  | 0.618841 | 0.377854 | 1.013523 | 0.056573 |
| MCTP1    | 1.145009 | 0.882104 | 1.48627  | 0.30895  |
| POLD4    | 1.513013 | 0.904098 | 2.532037 | 0.114976 |
| OR52W1   | 0.529891 | 0.253866 | 1.106037 | 0.090736 |
| LRRC25   | 1.178092 | 1.052384 | 1.318816 | 0.004416 |
| DPP10    | 0.916093 | 0.738329 | 1.136657 | 0.425909 |
| CLCF1    | 0.939558 | 0.725668 | 1.216492 | 0.636182 |
| TSGA10IP | 0.906956 | 0.507556 | 1.620647 | 0.741592 |
| GPR152   | 0.798212 | 0.520121 | 1.224987 | 0.302377 |
| UBQLNL   | 1.069523 | 0.760056 | 1.504994 | 0.699744 |
| KCNE3    | 1.030652 | 0.824136 | 1.288919 | 0.791291 |
| CABP4    | 1.140791 | 0.772209 | 1.6853   | 0.508229 |
| ALG10B   | 1.02928  | 0.709015 | 1.494212 | 0.879381 |
| DRAP1    | 1.737851 | 1.140834 | 2.647297 | 0.010067 |
| LONRF3   | 0.933249 | 0.785876 | 1.108258 | 0.430817 |
| UCP3     | 1.04103  | 0.680183 | 1.593311 | 0.853092 |
| UCP2     | 1.921646 | 1.412139 | 2.614987 | 3.25E-05 |
| PPAF1    | 1.363925 | 0.745704 | 2.494679 | 0.313706 |
| MRPL48   | 0.964838 | 0.464907 | 2.002363 | 0.92345  |
| RAB6A    | 1.079866 | 0.626633 | 1.860914 | 0.781999 |
| P2RY2    | 0.860814 | 0.732643 | 1.011409 | 0.068447 |
| FOSL1    | 1.130989 | 0.945481 | 1.352894 | 0.178096 |
| ERCC4    | 1.083335 | 0.661679 | 1.773692 | 0.750327 |

|          |          |          |          |          |
|----------|----------|----------|----------|----------|
| CCDC85B  | 1.305204 | 0.964014 | 1.76715  | 0.084907 |
| TMEM70   | 2.209639 | 1.165333 | 4.18979  | 0.015154 |
| RPS6KB2  | 1.287264 | 0.795457 | 2.08314  | 0.303859 |
| TOM1L2   | 1.029911 | 0.689984 | 1.537306 | 0.885336 |
| ZNF77    | 0.601669 | 0.413713 | 0.875015 | 0.007845 |
| B3GNTL1  | 0.823521 | 0.608569 | 1.114394 | 0.208341 |
| MLXIP    | 0.974847 | 0.634533 | 1.497678 | 0.90743  |
| AURKAIP1 | 1.685879 | 1.141083 | 2.49078  | 0.008724 |
| TTLL11   | 1.285484 | 0.753717 | 2.192425 | 0.356543 |
| TOMM5    | 0.735614 | 0.489161 | 1.106235 | 0.14022  |
| SLC35E3  | 1.195314 | 0.731189 | 1.954044 | 0.476801 |
| ZNF169   | 0.851056 | 0.54076  | 1.339403 | 0.485793 |
| RUVBL1   | 1.238716 | 0.803731 | 1.909118 | 0.332056 |
| SFN      | 1.781402 | 1.049581 | 3.023484 | 0.032415 |
| MSRA     | 0.979471 | 0.555779 | 1.726161 | 0.942804 |
| ETV4     | 1.012146 | 0.658908 | 1.554755 | 0.956038 |
| GAPT     | 1.115408 | 0.883258 | 1.408574 | 0.358968 |
| BAIAP2   | 0.959472 | 0.739676 | 1.24458  | 0.75529  |
| ZDHHC21  | 0.750127 | 0.508695 | 1.106144 | 0.146811 |
| PLEKHF2  | 1.022115 | 0.673321 | 1.551592 | 0.918191 |
| A2M      | 1.053968 | 0.861417 | 1.28956  | 0.60959  |
| ARL4D    | 1.339712 | 0.921088 | 1.948595 | 0.12603  |
| DOK7     | 0.882249 | 0.569838 | 1.365939 | 0.574299 |
| LRRN1    | 0.77884  | 0.580286 | 1.045331 | 0.095973 |
| UBE2O    | 1.028538 | 0.700711 | 1.509738 | 0.885741 |
| ORAI3    | 0.743151 | 0.517343 | 1.06752  | 0.108187 |
| UNC119B  | 0.93214  | 0.64765  | 1.341596 | 0.705247 |
| DENND2C  | 1.424213 | 0.981801 | 2.065982 | 0.062435 |
| ASCL3    | 0.7796   | 0.506396 | 1.200199 | 0.258058 |
| TUBB6    | 1.039627 | 0.887156 | 1.218303 | 0.631036 |
| LYSMD3   | 0.766164 | 0.514574 | 1.140764 | 0.189687 |
| B3GALT6  | 1.203351 | 0.763145 | 1.897482 | 0.425652 |
| ZNF613   | 0.7878   | 0.560336 | 1.107603 | 0.170046 |
| JAKMIP2  | 1.21309  | 0.979484 | 1.502411 | 0.076724 |
| MBLAC2   | 0.777276 | 0.553226 | 1.092065 | 0.146414 |
| ZNF683   | 1.064752 | 0.859795 | 1.318566 | 0.56518  |
| SLC35A4  | 1.806823 | 1.155152 | 2.826131 | 0.009545 |
| IP6K1    | 1.036661 | 0.587071 | 1.830555 | 0.901232 |
| SSNA1    | 1.558739 | 1.048152 | 2.318047 | 0.028363 |
| CSTF3    | 0.877618 | 0.509707 | 1.511088 | 0.637729 |
| YES1     | 0.915251 | 0.746404 | 1.122294 | 0.394709 |
| CHMP6    | 0.969918 | 0.656673 | 1.432585 | 0.87801  |
| DLEU1    | 0.784152 | 0.537821 | 1.143308 | 0.206284 |
| UFSP1    | 0.838034 | 0.488056 | 1.438977 | 0.521793 |
| TMEM39A  | 0.918669 | 0.545938 | 1.545877 | 0.749365 |
| TCP11L1  | 1.008784 | 0.695591 | 1.462993 | 0.963221 |
| GPX2     | 0.853614 | 0.632742 | 1.151586 | 0.300171 |
| CCDC57   | 0.67229  | 0.519345 | 0.870276 | 0.00257  |
| HSF5     | 1.146934 | 0.917922 | 1.433082 | 0.227684 |
| SPHK1    | 1.036908 | 0.799673 | 1.344522 | 0.784524 |
| BNIP3    | 0.585216 | 0.399671 | 0.856899 | 0.005892 |
| MYPOP    | 1.054526 | 0.73636  | 1.510166 | 0.772007 |
| ATAD5    | 0.805241 | 0.561874 | 1.154019 | 0.238094 |
| ZNF404   | 0.987587 | 0.792711 | 1.23037  | 0.911316 |
| RTTN     | 0.662674 | 0.401515 | 1.093699 | 0.107485 |
| ACBD7    | 0.938909 | 0.671195 | 1.313404 | 0.712814 |
| ANAPC2   | 1.139461 | 0.792817 | 1.637668 | 0.480524 |
| ZBTB8OS  | 0.900001 | 0.439826 | 1.841641 | 0.773038 |

|          |          |          |          |          |
|----------|----------|----------|----------|----------|
| ZNF135   | 1.091818 | 0.927759 | 1.284888 | 0.290337 |
| COX8A    | 1.418637 | 1.031216 | 1.95161  | 0.031646 |
| TAC4     | 0.830452 | 0.591839 | 1.165266 | 0.282384 |
| ZSCAN2   | 0.631686 | 0.41291  | 0.966377 | 0.034207 |
| B3GNT4   | 0.827412 | 0.435681 | 1.571357 | 0.562638 |
| CDC26    | 1.656716 | 0.915903 | 2.996723 | 0.095025 |
| HSD11B2  | 0.978221 | 0.637893 | 1.500119 | 0.919597 |
| CRLF3    | 0.641848 | 0.412025 | 0.999864 | 0.04993  |
| RNPEP    | 1.56897  | 1.101374 | 2.235087 | 0.012603 |
| EID2     | 1.219381 | 0.624075 | 2.382547 | 0.561668 |
| EID2B    | 1.154741 | 0.69058  | 1.930879 | 0.583338 |
| KCMF1    | 1.413129 | 0.605224 | 3.299497 | 0.424123 |
| DNAJC30  | 1.18907  | 0.664021 | 2.129281 | 0.560186 |
| SPRYD4   | 0.886599 | 0.550712 | 1.427348 | 0.620308 |
| VPS37D   | 1.025637 | 0.562244 | 1.870952 | 0.934221 |
| CLEC14A  | 0.887883 | 0.754426 | 1.04495  | 0.152461 |
| CLK2     | 1.497472 | 0.85564  | 2.620754 | 0.157363 |
| LPCAT4   | 1.010165 | 0.675811 | 1.509939 | 0.960668 |
| SLCO3A1  | 1.185056 | 0.873299 | 1.608106 | 0.275655 |
| ZNF575   | 0.838141 | 0.513273 | 1.368627 | 0.480361 |
| WDR25    | 1.076242 | 0.510535 | 2.268792 | 0.84688  |
| DIRAS1   | 0.865007 | 0.693903 | 1.078302 | 0.197199 |
| PHLDB3   | 1.714599 | 1.170437 | 2.511753 | 0.005643 |
| PRR15    | 0.732939 | 0.565098 | 0.950632 | 0.019205 |
| GNG7     | 0.923968 | 0.754112 | 1.132083 | 0.445476 |
| CNTD1    | 0.986532 | 0.540294 | 1.801326 | 0.964792 |
| KBTBD11  | 0.823012 | 0.688672 | 0.983558 | 0.03217  |
| B3GNT5   | 0.998954 | 0.749714 | 1.331054 | 0.994299 |
| LMNB2    | 1.480868 | 0.998362 | 2.196569 | 0.05096  |
| MEX3C    | 0.718296 | 0.485158 | 1.063466 | 0.098408 |
| RNF152   | 0.894541 | 0.523417 | 1.528807 | 0.683594 |
| MYO1D    | 0.907183 | 0.749532 | 1.097992 | 0.317238 |
| FOXL1    | 0.76121  | 0.484838 | 1.195122 | 0.235823 |
| LRRC37A  | 0.846336 | 0.521698 | 1.372987 | 0.499131 |
| FOXC2    | 0.544618 | 0.211856 | 1.400051 | 0.207155 |
| CCDC121  | 1.037207 | 0.708017 | 1.519451 | 0.85125  |
| ACSF3    | 1.104517 | 0.677969 | 1.79943  | 0.689743 |
| BOK      | 1.110403 | 0.703808 | 1.751891 | 0.652608 |
| ZNF843   | 0.936549 | 0.538143 | 1.629909 | 0.816628 |
| TTY14    | 0.952014 | 0.818732 | 1.106994 | 0.5228   |
| PFN4     | 0.768927 | 0.508552 | 1.162613 | 0.212884 |
| CDK5R1   | 1.090069 | 0.720392 | 1.649448 | 0.683211 |
| ZNF285B  | 0.624196 | 0.384809 | 1.012504 | 0.056183 |
| RUFY1    | 1.206835 | 0.796059 | 1.829577 | 0.375842 |
| BASP1    | 1.122815 | 0.998513 | 1.26259  | 0.052976 |
| LRRC37A3 | 0.713034 | 0.465034 | 1.093291 | 0.12091  |
| IRX5     | 0.823084 | 0.697447 | 0.971353 | 0.021228 |
| METRNL   | 1.133084 | 0.950898 | 1.350174 | 0.16241  |
| FAM91A1  | 1.175487 | 0.773007 | 1.787526 | 0.449628 |
| WSB2     | 1.343098 | 0.902613 | 1.998544 | 0.145758 |
| SOX11    | 0.189506 | 0.00759  | 4.731786 | 0.31097  |
| TYMS     | 1.008579 | 0.732211 | 1.38926  | 0.958304 |
| PXMP2    | 0.86642  | 0.531789 | 1.411621 | 0.564794 |
| TCEANC   | 0.965022 | 0.603315 | 1.543586 | 0.881897 |
| PNMA1    | 1.382754 | 1.014636 | 1.884427 | 0.040173 |
| ANKLE2   | 0.800448 | 0.515382 | 1.243188 | 0.321735 |
| C8G      | 1.205107 | 0.807583 | 1.798306 | 0.360962 |
| FUT2     | 0.906243 | 0.650751 | 1.262046 | 0.560148 |



|          |          |          |          |          |
|----------|----------|----------|----------|----------|
| EFCAB5   | 0.91507  | 0.559723 | 1.496014 | 0.723424 |
| GCNT4    | 1.036077 | 0.739218 | 1.452152 | 0.83698  |
| MUC20    | 0.878265 | 0.639221 | 1.206704 | 0.423242 |
| THAP4    | 1.749056 | 1.089742 | 2.807268 | 0.02056  |
| NFATC2IP | 1.089735 | 0.61211  | 1.940049 | 0.770274 |
| FAM89B   | 1.528196 | 1.008685 | 2.315276 | 0.045418 |
| SHMT1    | 1.527639 | 1.01356  | 2.302459 | 0.042938 |
| DPP7     | 1.354472 | 1.007178 | 1.821518 | 0.044719 |
| SEC24C   | 1.12253  | 0.741661 | 1.698989 | 0.584644 |
| SMCR8    | 1.415214 | 0.892609 | 2.243794 | 0.139718 |
| MTHFR    | 1.35578  | 0.943327 | 1.94857  | 0.100029 |
| DEAF1    | 1.172195 | 0.842854 | 1.630223 | 0.345127 |
| MTX3     | 1.124755 | 0.909016 | 1.391696 | 0.279247 |
| TMEM80   | 1.316413 | 0.824887 | 2.100826 | 0.249016 |
| FBXO46   | 0.954603 | 0.587804 | 1.550292 | 0.851042 |
| ZDHHC13  | 1.194346 | 0.794098 | 1.79633  | 0.393744 |
| SLC38A9  | 0.676693 | 0.424532 | 1.07863  | 0.100639 |
| ACER2    | 0.673586 | 0.478512 | 0.948185 | 0.023516 |
| WDR73    | 0.621993 | 0.363029 | 1.065686 | 0.083919 |
| POLE     | 0.928667 | 0.720886 | 1.196336 | 0.566846 |
| SCN4B    | 0.964016 | 0.641909 | 1.447754 | 0.8598   |
| RHOG     | 1.449136 | 1.072373 | 1.958271 | 0.015744 |
| EPS8L2   | 1.246654 | 0.897436 | 1.731763 | 0.188623 |
| ANO6     | 1.205247 | 0.881649 | 1.647617 | 0.241873 |
| ZBTB34   | 1.311253 | 0.840355 | 2.046023 | 0.232575 |
| TALDO1   | 2.175452 | 1.271533 | 3.721957 | 0.004558 |
| ULK1     | 0.959786 | 0.711649 | 1.294442 | 0.787975 |
| RPS6KA3  | 1.056166 | 0.732088 | 1.523705 | 0.77011  |
| B3GNT8   | 1.527204 | 1.150802 | 2.026719 | 0.003359 |
| PUS1     | 1.326607 | 0.85898  | 2.048809 | 0.202492 |
| CHD9     | 0.658823 | 0.432332 | 1.00397  | 0.052194 |
| TRIM72   | 0.92396  | 0.578094 | 1.476753 | 0.740982 |
| MAN1B1   | 1.044446 | 0.704218 | 1.549048 | 0.828799 |
| KCNA3    | 1.073897 | 0.911392 | 1.265376 | 0.394415 |
| FZD8     | 1.220898 | 0.961611 | 1.5501   | 0.1013   |
| FBXO39   | 0.993631 | 0.737829 | 1.338119 | 0.966444 |
| TOP3A    | 1.268668 | 0.737626 | 2.182026 | 0.389746 |
| CASKIN2  | 0.798394 | 0.641299 | 0.993971 | 0.044003 |
| ZBTB38   | 1.456808 | 1.148977 | 1.847112 | 0.001893 |
| FLJ13224 | 0.790083 | 0.555286 | 1.124162 | 0.190366 |
| RPL13AP3 | 1.057358 | 0.560437 | 1.994882 | 0.863282 |
| CCDC71   | 1.120699 | 0.726467 | 1.72887  | 0.606419 |
| LRRN4CL  | 0.630148 | 0.258919 | 1.533636 | 0.308859 |
| FLJ40194 | 1.708294 | 1.060724 | 2.751203 | 0.027635 |
| TIMM22   | 1.966731 | 0.989074 | 3.910757 | 0.053776 |
| HIC1     | 0.944187 | 0.636462 | 1.400695 | 0.775336 |
| PPFIA3   | 1.011623 | 0.772227 | 1.325233 | 0.933156 |
| MAGEF1   | 1.747464 | 1.188294 | 2.569762 | 0.004558 |
| UMODL1   | 0.903455 | 0.783358 | 1.041965 | 0.162987 |
| SAMD9L   | 1.168032 | 0.915719 | 1.489865 | 0.210978 |
| PAWR     | 1.090996 | 0.943464 | 1.2616   | 0.240045 |
| TGIF1    | 0.544317 | 0.415988 | 0.712234 | 9.27E-06 |
| NAP1L5   | 1.22305  | 0.80941  | 1.848075 | 0.339073 |
| CD19     | 1.15206  | 0.941196 | 1.410164 | 0.169941 |
| OR2T8    | 0.820534 | 0.632165 | 1.065032 | 0.137153 |
| NR2C2    | 0.77731  | 0.534609 | 1.130194 | 0.187136 |
| ACOT4    | 1.407555 | 1.088136 | 1.820738 | 0.009237 |
| ARIH2    | 1.181301 | 0.636836 | 2.191258 | 0.597127 |

|          |          |          |          |          |
|----------|----------|----------|----------|----------|
| RBM44    | 0.747229 | 0.477747 | 1.168716 | 0.201671 |
| ZBTB33   | 1.124757 | 0.77048  | 1.641935 | 0.54246  |
| ZBED2    | 0.847301 | 0.729514 | 0.984104 | 0.030023 |
| IRX3     | 0.886241 | 0.793169 | 0.990234 | 0.032897 |
| OR2B11   | 1.093942 | 0.756109 | 1.582721 | 0.633754 |
| SLC25A22 | 1.460802 | 1.032351 | 2.067073 | 0.032377 |
| RABEP2   | 1.569891 | 1.070608 | 2.302016 | 0.020926 |
| ATOX1    | 0.574822 | 0.357416 | 0.92447  | 0.022377 |
| TBL1XR1  | 0.637734 | 0.407233 | 0.998703 | 0.049341 |
| CD163    | 1.114314 | 1.02183  | 1.215169 | 0.014347 |
| ZNF491   | 0.544953 | 0.386759 | 0.767852 | 0.000521 |
| RPLP2    | 1.340196 | 0.86384  | 2.079236 | 0.191294 |
| JUN      | 0.94046  | 0.818445 | 1.080664 | 0.386593 |
| CSTF2T   | 0.889868 | 0.555543 | 1.425391 | 0.627383 |
| GBA      | 1.464866 | 1.010931 | 2.12263  | 0.043652 |
| ACAD9    | 0.990098 | 0.622252 | 1.575399 | 0.966505 |
| IL17RA   | 1.003737 | 0.853365 | 1.180606 | 0.964075 |
| PNPLA2   | 0.938555 | 0.711073 | 1.238811 | 0.65431  |
| MBOAT4   | 1.094626 | 0.700514 | 1.710467 | 0.691363 |
| AGTRAP   | 1.185382 | 0.962742 | 1.45951  | 0.109104 |
| CD163L1  | 1.083874 | 0.786314 | 1.494037 | 0.622818 |
| THAP5    | 0.829627 | 0.558764 | 1.231791 | 0.35434  |
| SUMO4    | 0.844806 | 0.619585 | 1.151894 | 0.286386 |
| DNAJC28  | 1.012814 | 0.624372 | 1.642919 | 0.958855 |
| NAALADL  | 0.775487 | 0.50935  | 1.18068  | 0.235803 |
| CD151    | 0.992334 | 0.804451 | 1.2241   | 0.942718 |
| POLR2L   | 1.682242 | 1.19285  | 2.372417 | 0.003023 |
| FAM20C   | 1.117121 | 0.953129 | 1.309329 | 0.171525 |
| FLII     | 1.466544 | 1.030685 | 2.086723 | 0.033344 |
| SOX12    | 0.961837 | 0.74344  | 1.244391 | 0.76715  |
| HNRNPA0  | 0.981709 | 0.60531  | 1.592164 | 0.940355 |
| FAM87B   | 0.69492  | 0.426164 | 1.133164 | 0.144602 |
| CHID1    | 0.966034 | 0.670506 | 1.391819 | 0.852859 |
| ZNF620   | 0.927182 | 0.634991 | 1.353825 | 0.695457 |
| ZNF518A  | 0.673233 | 0.487164 | 0.930371 | 0.016519 |
| TMEM187  | 1.284745 | 0.882846 | 1.8696   | 0.190535 |
| ZNF619   | 0.832415 | 0.532953 | 1.300143 | 0.4201   |
| AP3S1    | 0.623537 | 0.37465  | 1.037766 | 0.069165 |
| GRB2     | 1.351338 | 0.820193 | 2.226443 | 0.237245 |
| ZBTB41   | 0.729334 | 0.472533 | 1.125695 | 0.154073 |
| UBE2N    | 1.682949 | 0.960241 | 2.949592 | 0.069026 |
| ARL6IP6  | 1.016021 | 0.592916 | 1.741054 | 0.953877 |
| ZNF354C  | 1.091862 | 0.892996 | 1.335014 | 0.391598 |
| MAMDC4   | 0.739901 | 0.547087 | 1.000671 | 0.050511 |
| CENPBD1  | 1.313676 | 0.843893 | 2.044978 | 0.226939 |
| ODF3     | 0.836207 | 0.50602  | 1.381848 | 0.485189 |
| BET1L    | 1.104219 | 0.686446 | 1.77625  | 0.68272  |
| RPS27    | 1.048959 | 0.70171  | 1.568048 | 0.815742 |
| RIC8A    | 1.48134  | 0.900744 | 2.436173 | 0.121592 |
| IMP3     | 3.400043 | 1.695085 | 6.81989  | 0.000569 |
| ASB8     | 1.499617 | 0.769304 | 2.92323  | 0.234107 |
| ODF3B    | 1.072369 | 0.913212 | 1.259263 | 0.393996 |
| DPY19L2  | 0.813306 | 0.713077 | 0.927624 | 0.002073 |
| GPR150   | 0.87571  | 0.581582 | 1.318591 | 0.525059 |
| TSPYL6   | 0.815258 | 0.467973 | 1.420266 | 0.470798 |
| DMAP1    | 1.056954 | 0.67145  | 1.663789 | 0.810885 |
| IMPDH2   | 1.102867 | 0.759823 | 1.600789 | 0.606503 |
| ALS2CL   | 0.991231 | 0.832529 | 1.180186 | 0.921188 |

|          |          |          |          |          |
|----------|----------|----------|----------|----------|
| MLF1     | 1.279605 | 0.983848 | 1.66427  | 0.065984 |
| NDUFAF3  | 1.584634 | 0.915356 | 2.743267 | 0.100155 |
| GRAMD1C  | 1.427804 | 1.029441 | 1.980321 | 0.032858 |
| STAP2    | 0.940315 | 0.695488 | 1.271328 | 0.689218 |
| TSSK6    | 0.961837 | 0.680399 | 1.359687 | 0.825631 |
| BOLA1    | 1.633956 | 1.026696 | 2.600393 | 0.03835  |
| PDE4DIP  | 1.853663 | 1.29615  | 2.650978 | 0.000722 |
| DDX10    | 0.895171 | 0.552558 | 1.450221 | 0.652797 |
| NDUFV2   | 0.731756 | 0.509667 | 1.05062  | 0.090574 |
| DALRD3   | 1.029276 | 0.673662 | 1.572613 | 0.893858 |
| ZNF114   | 0.690365 | 0.525819 | 0.906402 | 0.007644 |
| ZNF518B  | 1.2217   | 0.922709 | 1.617573 | 0.162035 |
| LCORL    | 0.573191 | 0.361409 | 0.909076 | 0.018027 |
| PARD6G   | 0.644113 | 0.465986 | 0.89033  | 0.007738 |
| SH2B1    | 1.201175 | 0.79109  | 1.823841 | 0.389672 |
| ZC3H12D  | 1.383639 | 0.963367 | 1.987257 | 0.078761 |
| VN1R1    | 0.991931 | 0.736007 | 1.336845 | 0.957562 |
| SH2D4B   | 0.824641 | 0.45171  | 1.505464 | 0.530117 |
| RNF212   | 0.893396 | 0.687272 | 1.16134  | 0.399615 |
| PRSS36   | 1.669392 | 1.293209 | 2.155003 | 8.36E-05 |
| ZNF543   | 0.895935 | 0.631891 | 1.270311 | 0.537328 |
| GALNT11  | 0.755065 | 0.511721 | 1.11413  | 0.15693  |
| WDR6     | 1.007531 | 0.732054 | 1.386672 | 0.963277 |
| GEN1     | 0.777114 | 0.534425 | 1.13001  | 0.186799 |
| TMPRSS9  | 0.747372 | 0.558708 | 0.999743 | 0.049798 |
| AQP11    | 0.548941 | 0.378517 | 0.796096 | 0.001565 |
| TMEM11   | 1.718931 | 1.071547 | 2.757436 | 0.024669 |
| ZNF354B  | 0.83643  | 0.58868  | 1.188448 | 0.318949 |
| KCNG2    | 0.863131 | 0.666654 | 1.117514 | 0.264045 |
| ZFAND2A  | 1.057902 | 0.712326 | 1.571128 | 0.780293 |
| PLEKHM3  | 1.019483 | 0.680351 | 1.52766  | 0.925499 |
| ZNF223   | 0.649628 | 0.366955 | 1.15005  | 0.138816 |
| BEND3    | 0.512158 | 0.3312   | 0.791987 | 0.002625 |
| NT5DC1   | 1.006406 | 0.681745 | 1.485678 | 0.974365 |
| GLDC     | 1.021891 | 0.617532 | 1.691025 | 0.932845 |
| TUBAL3   | 1.112156 | 0.871026 | 1.420037 | 0.393919 |
| P4HTM    | 0.904804 | 0.641954 | 1.275277 | 0.567798 |
| DTX3     | 1.087617 | 0.921267 | 1.284003 | 0.321346 |
| KLHL11   | 0.623005 | 0.40509  | 0.958147 | 0.03119  |
| CTXN1    | 0.774425 | 0.542    | 1.10652  | 0.16031  |
| SLC25A20 | 1.456252 | 0.853616 | 2.484336 | 0.167834 |
| CA8      | 0.868084 | 0.669015 | 1.126387 | 0.287126 |
| CD28     | 0.948149 | 0.750465 | 1.197907 | 0.655376 |
| EPM2AIP1 | 0.731585 | 0.477072 | 1.121877 | 0.151926 |
| MAF      | 1.06777  | 0.834292 | 1.366587 | 0.602465 |
| CTNNBIP1 | 0.779417 | 0.52938  | 1.147553 | 0.206719 |
| GTPBP6   | 1.020284 | 0.693444 | 1.501173 | 0.91882  |
| ERN1     | 1.03429  | 0.768488 | 1.392028 | 0.823956 |
| GPR35    | 1.370734 | 1.087087 | 1.728393 | 0.007679 |
| ZNF713   | 0.724306 | 0.478566 | 1.096234 | 0.127153 |
| PARP10   | 1.609375 | 1.18998  | 2.17658  | 0.002007 |
| SUZ12    | 0.769406 | 0.499573 | 1.184983 | 0.234175 |
| NSUN3    | 0.79446  | 0.456155 | 1.383668 | 0.416326 |
| KCTD12   | 1.112068 | 1.009393 | 1.225187 | 0.031624 |
| RPP25    | 1.51089  | 1.135498 | 2.010384 | 0.004627 |
| GRINA    | 1.650641 | 1.240825 | 2.195809 | 0.000578 |
| THBD     | 1.155628 | 0.94377  | 1.415043 | 0.161552 |
| GP5      | 1.178189 | 0.911967 | 1.522126 | 0.209552 |

|          |          |          |          |          |
|----------|----------|----------|----------|----------|
| COX5A    | 2.341001 | 1.405684 | 3.898661 | 0.001081 |
| STX19    | 0.588485 | 0.382399 | 0.905638 | 0.015926 |
| ZHX2     | 1.042956 | 0.790695 | 1.375698 | 0.765931 |
| CPNE7    | 1.091904 | 0.965072 | 1.235405 | 0.162828 |
| CD300LB  | 1.204748 | 1.072176 | 1.353712 | 0.001739 |
| MPI      | 2.102747 | 1.241521 | 3.561393 | 0.005698 |
| TRIM73   | 0.654587 | 0.368846 | 1.161689 | 0.147653 |
| OPLAH    | 1.228948 | 1.000208 | 1.51     | 0.049769 |
| TMEM52   | 0.909976 | 0.591843 | 1.399116 | 0.66733  |
| MSC      | 1.189235 | 0.937271 | 1.508934 | 0.153674 |
| APOLD1   | 0.859984 | 0.643129 | 1.14996  | 0.308931 |
| EXOSC4   | 1.91475  | 1.295279 | 2.830485 | 0.001125 |
| DPY19L3  | 0.536831 | 0.365885 | 0.787645 | 0.001471 |
| TAF7     | 1.084632 | 0.747936 | 1.572898 | 0.668355 |
| PFAS     | 1.192099 | 0.83272  | 1.706576 | 0.337093 |
| ZNF552   | 0.90553  | 0.616535 | 1.329989 | 0.612879 |
| GAK      | 1.134427 | 0.740736 | 1.737361 | 0.561935 |
| ZBTB7A   | 1.673595 | 1.034428 | 2.707699 | 0.035918 |
| TUFM     | 1.682467 | 1.087663 | 2.602548 | 0.019412 |
| RMI1     | 1.148089 | 0.827439 | 1.592997 | 0.408563 |
| FBXO34   | 1.465418 | 0.861449 | 2.492832 | 0.158608 |
| EIF3K    | 1.613054 | 0.955854 | 2.722111 | 0.073317 |
| MRFAP1L1 | 1.183277 | 0.818308 | 1.711025 | 0.371138 |
| SNX18    | 0.999669 | 0.728095 | 1.372537 | 0.998364 |
| AURKB    | 1.006157 | 0.764042 | 1.324996 | 0.965137 |
| MRFAP1   | 1.507326 | 0.783442 | 2.900065 | 0.219075 |
| TMEM107  | 1.169544 | 0.875359 | 1.562596 | 0.289397 |
| RRS1     | 1.593583 | 1.058337 | 2.399528 | 0.02565  |
| RCC2     | 1.281844 | 0.722863 | 2.273078 | 0.395569 |
| OR13D1   | 0.866627 | 0.625363 | 1.200971 | 0.38985  |
| IGSF22   | 0.781076 | 0.419024 | 1.455954 | 0.436779 |
| DPM3     | 1.343503 | 0.950071 | 1.899858 | 0.09487  |
| CYC1     | 1.991072 | 1.293334 | 3.06523  | 0.001757 |
| PER1     | 1.022138 | 0.861699 | 1.212449 | 0.801544 |
| HTR1F    | 1.200841 | 1.078979 | 1.336466 | 0.000801 |
| TMTC2    | 0.973684 | 0.826571 | 1.146981 | 0.749653 |
| FARSA    | 0.892007 | 0.63774  | 1.24765  | 0.504429 |
| SPTY2D1  | 0.554548 | 0.345685 | 0.889608 | 0.014483 |
| SAMD4B   | 0.833544 | 0.479353 | 1.449443 | 0.518923 |
| GIMAP7   | 1.090717 | 0.941954 | 1.262974 | 0.245776 |
| EDC3     | 1.047931 | 0.627844 | 1.749096 | 0.857841 |
| FUCA1    | 1.403167 | 1.076451 | 1.829045 | 0.012256 |
| PXT1     | 0.364872 | 0.070058 | 1.900313 | 0.231134 |
| GGN      | 1.012752 | 0.618761 | 1.657614 | 0.959798 |
| ZNF664   | 0.855471 | 0.580096 | 1.261567 | 0.43092  |
| CALR     | 0.702758 | 0.548812 | 0.899886 | 0.005172 |
| MAGED1   | 1.185706 | 0.96911  | 1.450712 | 0.097906 |
| LDLRAD3  | 1.122769 | 1.004669 | 1.25475  | 0.04114  |
| CDH4     | 0.878441 | 0.743753 | 1.03752  | 0.126955 |
| RAD23A   | 1.76653  | 1.156743 | 2.697772 | 0.008439 |
| GADD45G  | 1.416117 | 0.96221  | 2.084149 | 0.077634 |
| MEIS3P1  | 0.865475 | 0.624808 | 1.198845 | 0.384817 |
| DAND5    | 0.87433  | 0.447818 | 1.707063 | 0.694018 |
| TMEM151  | 1.819256 | 0.385279 | 8.590374 | 0.449872 |
| PTPN11   | 1.042501 | 0.697504 | 1.558139 | 0.839136 |
| NSUN7    | 0.877193 | 0.643309 | 1.196111 | 0.407589 |
| WSCD1    | 1.945309 | 1.065001 | 3.553263 | 0.030399 |
| CLK3     | 0.986541 | 0.642285 | 1.515313 | 0.950655 |

|          |          |          |          |          |
|----------|----------|----------|----------|----------|
| HLA-DQB1 | 1.143573 | 1.018051 | 1.28457  | 0.023726 |
| GATA2    | 0.933282 | 0.808902 | 1.076787 | 0.344059 |
| ARID3B   | 1.797194 | 1.249514 | 2.58493  | 0.001572 |
| PACS2    | 1.585047 | 1.096443 | 2.291388 | 0.014301 |
| ELMOD2   | 0.726255 | 0.485868 | 1.085575 | 0.118855 |
| EGR3     | 0.964268 | 0.822472 | 1.130509 | 0.653883 |
| GPC5     | 0.719293 | 0.478665 | 1.080885 | 0.112819 |
| VWA1     | 1.118557 | 0.910984 | 1.373428 | 0.284718 |
| GEMIN4   | 1.045986 | 0.71692  | 1.526093 | 0.815549 |
| FJX1     | 1.423775 | 0.75882  | 2.67143  | 0.271162 |
| KLHL28   | 0.586074 | 0.355408 | 0.966448 | 0.036287 |
| MKRN3    | 1.036392 | 0.883812 | 1.215314 | 0.659994 |
| SHARPIN  | 1.654989 | 1.119148 | 2.447387 | 0.011606 |
| LBX2     | 1.1141   | 0.780831 | 1.589612 | 0.55132  |
| DNHD1    | 1.0234   | 0.716997 | 1.460743 | 0.898614 |
| SLITRK4  | 1.068446 | 0.933012 | 1.223539 | 0.3384   |
| GCC1     | 1.204587 | 0.708583 | 2.04779  | 0.491747 |
| RNF151   | 0.977542 | 0.404878 | 2.360187 | 0.959719 |
| CIITA    | 1.178396 | 1.013238 | 1.370476 | 0.033118 |
| ZFPM1    | 1.127153 | 0.907748 | 1.399589 | 0.278509 |
| ALOX15B  | 1.01067  | 0.859908 | 1.187862 | 0.897543 |
| PLD6     | 0.799875 | 0.570415 | 1.121641 | 0.195495 |
| CDC42EP4 | 0.844638 | 0.667919 | 1.068114 | 0.158604 |
| ZBTB42   | 1.030939 | 0.740365 | 1.435555 | 0.856857 |
| MAF1     | 1.693706 | 1.078852 | 2.658976 | 0.022034 |
| FCER1A   | 1.070924 | 0.961246 | 1.193117 | 0.213874 |
| FLJ37453 | 1.282852 | 0.740386 | 2.222773 | 0.37445  |
| APOBEC3F | 1.125915 | 0.890135 | 1.424149 | 0.322556 |
| PIPOX    | 0.973621 | 0.68139  | 1.391184 | 0.88328  |
| CDH5     | 1.091685 | 0.790131 | 1.508326 | 0.594837 |
| MYADM    | 1.200212 | 0.927909 | 1.552425 | 0.16451  |
| SERTAD2  | 0.664794 | 0.418523 | 1.055978 | 0.083761 |
| AKAP5    | 0.668666 | 0.419121 | 1.066791 | 0.09128  |
| NKPD1    | 0.711256 | 0.464547 | 1.088986 | 0.116945 |
| GIPC3    | 1.024168 | 0.872065 | 1.202799 | 0.770957 |
| CITED4   | 1.076785 | 0.906704 | 1.278769 | 0.399002 |
| ABCA13   | 0.906493 | 0.708523 | 1.159778 | 0.434863 |
| TIGD5    | 1.010398 | 0.710962 | 1.435946 | 0.954002 |
| PDXDC1   | 0.866022 | 0.525794 | 1.426404 | 0.57208  |
| ZNF154   | 0.986339 | 0.811174 | 1.198492 | 0.889934 |
| R3HDM2   | 0.885939 | 0.418755 | 1.874337 | 0.751428 |
| B3GNT3   | 1.365582 | 0.873783 | 2.134183 | 0.171403 |
| ITLN1    | 1.337559 | 1.030348 | 1.736369 | 0.028924 |
| SEPHS2   | 2.414671 | 1.331563 | 4.378793 | 0.003697 |
| GPBAR1   | 1.199808 | 1.028255 | 1.399983 | 0.020674 |
| ZNF784   | 0.933717 | 0.611274 | 1.426247 | 0.751015 |
| BBS10    | 1.074759 | 0.753303 | 1.53339  | 0.690913 |
| FIZ1     | 1.165845 | 0.677099 | 2.007379 | 0.579939 |
| PUF60    | 1.517592 | 1.015331 | 2.26831  | 0.041935 |
| DCTPP1   | 1.73151  | 1.171983 | 2.558166 | 0.005835 |
| ZNF771   | 1.036594 | 0.590416 | 1.819951 | 0.900406 |
| TSHZ1    | 0.733269 | 0.453539 | 1.18553  | 0.205635 |
| PSTK     | 0.640327 | 0.367651 | 1.115241 | 0.115331 |
| SOCS4    | 1.045577 | 0.656422 | 1.665442 | 0.851152 |
| ZADH2    | 0.474512 | 0.278337 | 0.808952 | 0.006164 |
| ZNF48    | 1.357756 | 0.886269 | 2.080071 | 0.159956 |
| TMEM150  | 1.078669 | 0.925561 | 1.257104 | 0.332263 |
| ANKRD18  | 0.861811 | 0.738193 | 1.006132 | 0.059757 |

|          |          |          |          |          |
|----------|----------|----------|----------|----------|
| TMEM86B  | 1.083985 | 0.73287  | 1.603318 | 0.686361 |
| TRNAU1AI | 3.16053  | 1.4082   | 7.093417 | 0.005273 |
| EXOC3    | 1.229224 | 0.78475  | 1.925444 | 0.3674   |
| CSNK1A1L | 0.71859  | 0.354193 | 1.457884 | 0.359909 |
| LYNX1    | 1.384985 | 1.070205 | 1.79235  | 0.013296 |
| MED14    | 1.165351 | 0.673286 | 2.017036 | 0.584591 |
| FAHD1    | 1.737857 | 0.962894 | 3.136531 | 0.066587 |
| RCC1     | 1.500099 | 0.974028 | 2.310301 | 0.065691 |
| MYLPF    | 1.171332 | 0.813912 | 1.685709 | 0.394541 |
| F2       | 0.679656 | 0.433314 | 1.066046 | 0.09267  |
| PRKRA    | 0.469315 | 0.302379 | 0.728413 | 0.000744 |
| ZNRF2    | 0.685473 | 0.454734 | 1.033293 | 0.071301 |
| FGD6     | 1.004688 | 0.815397 | 1.237922 | 0.964975 |
| OAZ2     | 0.780666 | 0.447099 | 1.363097 | 0.383915 |
| PNPLA1   | 1.078625 | 0.869502 | 1.338045 | 0.491261 |
| CCDC43   | 0.807783 | 0.453289 | 1.439511 | 0.468987 |
| KCTD4    | 0.66188  | 0.464235 | 0.943671 | 0.022588 |
| FZD2     | 0.901226 | 0.771232 | 1.053132 | 0.190677 |
| TIGD2    | 1.076028 | 0.766482 | 1.510584 | 0.672019 |
| HCLS1    | 1.810668 | 1.274123 | 2.573157 | 0.00093  |
| ZNF609   | 0.602878 | 0.416182 | 0.873325 | 0.007444 |
| PAK2     | 0.89308  | 0.562618 | 1.417643 | 0.631481 |
| CCDC66   | 0.527934 | 0.324559 | 0.858748 | 0.010069 |
| MCFD2    | 1.238822 | 0.723282 | 2.121827 | 0.435373 |
| HARBI1   | 1.284146 | 0.705676 | 2.336809 | 0.412934 |
| GAS1     | 0.997266 | 0.727863 | 1.366383 | 0.986406 |
| ZNF571   | 0.796986 | 0.588857 | 1.078677 | 0.141696 |
| KCNE1    | 1.319773 | 1.12939  | 1.542249 | 0.000481 |
| NRIP1    | 1.151546 | 0.998634 | 1.327873 | 0.052239 |
| BHLHA15  | 1.101238 | 0.766199 | 1.582781 | 0.602333 |
| RNF182   | 1.02366  | 0.769349 | 1.362033 | 0.872504 |
| TSPYL5   | 1.122089 | 0.947182 | 1.329295 | 0.18275  |
| FUT7     | 1.295504 | 1.055802 | 1.589628 | 0.013133 |
| SSTR2    | 0.460955 | 0.275178 | 0.772153 | 0.003257 |
| ZNF594   | 0.976421 | 0.734822 | 1.297455 | 0.869322 |
| PCGF5    | 1.402182 | 1.01308  | 1.940729 | 0.041517 |
| PRF1     | 1.065382 | 0.899946 | 1.261231 | 0.461988 |
| YOD1     | 0.994155 | 0.748162 | 1.32103  | 0.967761 |
| TMEM64   | 0.784692 | 0.600676 | 1.025081 | 0.075357 |
| CHRM4    | 0.959411 | 0.688459 | 1.337    | 0.806676 |
| SHISA2   | 0.248053 | 0.087201 | 0.70562  | 0.008958 |
| S1PR5    | 1.262799 | 1.01246  | 1.575038 | 0.038471 |
| GPR157   | 1.042526 | 0.758342 | 1.433206 | 0.79759  |
| PIPSL    | 1.077196 | 0.638473 | 1.817386 | 0.780511 |
| CHST13   | 0.987226 | 0.843016 | 1.156105 | 0.873223 |
| SLC36A4  | 1.008917 | 0.767486 | 1.326297 | 0.949274 |
| ZDHHC20  | 0.912459 | 0.628123 | 1.325506 | 0.630614 |
| ZFP3     | 1.061676 | 0.840028 | 1.341808 | 0.616423 |
| MAP3K15  | 0.822963 | 0.590621 | 1.146704 | 0.249658 |
| PPA1     | 1.440981 | 1.130382 | 1.836924 | 0.003184 |
| PSMG4    | 0.723575 | 0.464708 | 1.126645 | 0.152102 |
| MAP6D1   | 0.557718 | 0.325625 | 0.955238 | 0.03344  |
| ZNF443   | 0.632997 | 0.454176 | 0.882224 | 0.006939 |
| SSR4     | 1.026012 | 0.685212 | 1.536313 | 0.900783 |
| CAPS2    | 1.066044 | 0.78298  | 1.451441 | 0.684609 |
| ZNF792   | 0.974121 | 0.743425 | 1.276405 | 0.849196 |
| CUEDC1   | 1.431601 | 1.162492 | 1.763007 | 0.000732 |
| SCRIB    | 1.050771 | 0.758609 | 1.455452 | 0.765753 |

|          |          |          |          |          |
|----------|----------|----------|----------|----------|
| KCTD2    | 1.143832 | 0.638937 | 2.047701 | 0.651055 |
| D2HGDH   | 1.238781 | 0.929905 | 1.650254 | 0.143378 |
| OXTR     | 1.018405 | 0.624952 | 1.659563 | 0.941648 |
| FAM83H   | 1.144521 | 0.920265 | 1.423426 | 0.225064 |
| ZNF572   | 0.919464 | 0.640254 | 1.320435 | 0.649325 |
| ST20     | 0.821204 | 0.556562 | 1.211681 | 0.320946 |
| PITPNB   | 0.974675 | 0.555241 | 1.710955 | 0.928807 |
| TCEAL8   | 1.073393 | 0.69926  | 1.647701 | 0.746007 |
| LRRC57   | 1.247623 | 0.664084 | 2.343926 | 0.491673 |
| MRPL14   | 1.97149  | 1.220708 | 3.184031 | 0.005514 |
| GPR137C  | 1.015177 | 0.647081 | 1.592665 | 0.947732 |
| BBS12    | 1.291506 | 0.904511 | 1.844076 | 0.159222 |
| ZFP82    | 0.705933 | 0.506201 | 0.984475 | 0.040153 |
| NQO1     | 1.432834 | 0.850598 | 2.413612 | 0.176447 |
| OR56B1   | 1.034495 | 0.687106 | 1.557518 | 0.870955 |
| AEN      | 1.326527 | 0.881358 | 1.996549 | 0.17556  |
| FKRP     | 1.159555 | 0.67256  | 1.999179 | 0.59426  |
| TRAPPC5  | 1.198034 | 0.687282 | 2.08835  | 0.523944 |
| RPH3AL   | 1.168539 | 0.922472 | 1.480242 | 0.196685 |
| SLC25A42 | 0.898943 | 0.678765 | 1.190542 | 0.457342 |
| FCRL6    | 1.162184 | 0.957131 | 1.411167 | 0.129122 |
| SLC26A11 | 1.136098 | 0.904356 | 1.427223 | 0.272968 |
| HIGD1A   | 1.476976 | 1.021054 | 2.136478 | 0.038398 |
| OR52N4   | 1.079292 | 0.823134 | 1.415164 | 0.58096  |
| MAPK15   | 0.986368 | 0.674331 | 1.442796 | 0.943608 |
| EHMT1    | 0.811692 | 0.534511 | 1.232611 | 0.327676 |
| F2R      | 1.130188 | 0.96326  | 1.326043 | 0.13338  |
| ZNF707   | 1.258276 | 0.798311 | 1.983262 | 0.322349 |
| NPM1     | 0.85908  | 0.61565  | 1.198764 | 0.371582 |
| PJA1     | 1.033257 | 0.659923 | 1.617797 | 0.886274 |
| DHTKD1   | 1.068263 | 0.758336 | 1.504854 | 0.705654 |
| PENK     | 1.936193 | 0.936113 | 4.00469  | 0.074763 |
| ZNF746   | 0.959381 | 0.621088 | 1.481934 | 0.851725 |
| POLR2A   | 1.221638 | 0.802493 | 1.859705 | 0.35045  |
| FRAT2    | 1.330659 | 0.989797 | 1.788905 | 0.058486 |
| TMEM102  | 1.230941 | 0.824517 | 1.8377   | 0.309521 |
| CCL13    | 1.215557 | 0.731639 | 2.019548 | 0.451078 |
| DDX60L   | 1.163322 | 0.90268  | 1.499221 | 0.242458 |
| AATK     | 1.044134 | 0.812363 | 1.342028 | 0.735936 |
| DDN      | 0.896834 | 0.594938 | 1.351925 | 0.603072 |
| SAGE1    | 1.223799 | 1.083777 | 1.381911 | 0.001123 |
| ZNF467   | 1.179088 | 0.976536 | 1.423653 | 0.0867   |
| ZNF678   | 0.792119 | 0.538304 | 1.165609 | 0.237035 |
| TMEM45A  | 1.323387 | 0.84239  | 2.079027 | 0.224073 |
| RAP2B    | 1.079066 | 0.700659 | 1.661839 | 0.729809 |
| ZBTB2    | 1.150986 | 0.636608 | 2.08098  | 0.64166  |
| RNF135   | 1.192838 | 0.796265 | 1.786922 | 0.392476 |
| ACBD4    | 1.569828 | 1.036252 | 2.378146 | 0.033337 |
| SGSH     | 1.112329 | 0.949853 | 1.302597 | 0.186376 |
| MAB21L2  | 1.037913 | 0.701377 | 1.535928 | 0.85237  |
| FANCB    | 1.100343 | 0.728842 | 1.661204 | 0.649123 |
| SETD2    | 0.824294 | 0.520168 | 1.306234 | 0.410718 |
| TMIE     | 0.913428 | 0.657542 | 1.268894 | 0.589238 |
| MEX3D    | 1.246565 | 0.910005 | 1.707599 | 0.16987  |
| MRPS23   | 1.565264 | 0.902891 | 2.713562 | 0.110473 |
| OR52H1   | 0.886149 | 0.639279 | 1.228352 | 0.468158 |
| GPR135   | 0.852687 | 0.594595 | 1.222808 | 0.386276 |
| P2RY13   | 1.154618 | 1.020922 | 1.305823 | 0.022037 |

|         |          |          |          |          |
|---------|----------|----------|----------|----------|
| ZFP41   | 1.018192 | 0.663326 | 1.562905 | 0.934281 |
| PHLDA2  | 1.200804 | 1.000478 | 1.441242 | 0.049403 |
| ATG9B   | 1.172123 | 0.742392 | 1.850602 | 0.495504 |
| GPR88   | 0.949926 | 0.734611 | 1.228351 | 0.695277 |
| PLAG1   | 1.033806 | 0.876546 | 1.21928  | 0.69292  |
| YIPF6   | 0.53262  | 0.292243 | 0.970712 | 0.039683 |
| ZBTB20  | 0.807983 | 0.58922  | 1.107967 | 0.185659 |
| AMIGO1  | 0.728728 | 0.57191  | 0.928545 | 0.010479 |
| GPR3    | 1.185693 | 0.890102 | 1.579446 | 0.244335 |
| SIAH2   | 1.544408 | 0.987374 | 2.415694 | 0.056872 |
| SLC9A9  | 1.244761 | 1.044682 | 1.483159 | 0.01433  |
| LSM10   | 1.945125 | 1.334337 | 2.835499 | 0.00054  |
| RELL1   | 0.73735  | 0.551735 | 0.985411 | 0.039467 |
| RFX7    | 0.844487 | 0.579107 | 1.231478 | 0.379848 |
| SLC35C1 | 1.660227 | 1.046285 | 2.634421 | 0.031395 |
| TIGIT   | 1.03793  | 0.736816 | 1.462101 | 0.831366 |
| RNF41   | 2.715115 | 1.210714 | 6.088842 | 0.015351 |
| SLC2A4  | 0.743467 | 0.512869 | 1.077746 | 0.117643 |
| CLDN7   | 0.801015 | 0.561709 | 1.142274 | 0.220449 |
| ZNF329  | 0.864936 | 0.574944 | 1.301196 | 0.486191 |
| ZNF101  | 1.551964 | 0.923636 | 2.607731 | 0.096925 |
| ADO     | 1.749433 | 0.967323 | 3.163904 | 0.064304 |
| PRKAG1  | 2.257457 | 1.121933 | 4.542262 | 0.022461 |
| GINS3   | 1.302282 | 0.852003 | 1.990532 | 0.222433 |
| OR52K2  | 0.979396 | 0.833523 | 1.150797 | 0.800254 |
| CCDC149 | 0.945726 | 0.775523 | 1.153283 | 0.581481 |
| MRPS11  | 1.755793 | 0.888248 | 3.470661 | 0.105423 |
| SNRPE   | 1.023593 | 0.626321 | 1.672853 | 0.925867 |
| RTKN2   | 0.929635 | 0.676942 | 1.276653 | 0.652111 |
| CHST15  | 1.123258 | 1.001257 | 1.260125 | 0.047548 |
| TRPC2   | 1.170356 | 0.952308 | 1.438329 | 0.134804 |
| IDH2    | 1.293772 | 0.839478 | 1.993912 | 0.243171 |
| TNRC18  | 0.701242 | 0.503763 | 0.976136 | 0.035457 |
| TMEM30B | 0.960462 | 0.474441 | 1.944366 | 0.910738 |
| DEXI    | 1.348889 | 1.029061 | 1.768118 | 0.030202 |
| NOP10   | 2.021432 | 1.314118 | 3.109453 | 0.001359 |
| FAM89A  | 0.978163 | 0.816062 | 1.172464 | 0.811232 |
| TDRKH   | 1.17414  | 0.900321 | 1.531236 | 0.236048 |
| ZNF708  | 0.616691 | 0.437517 | 0.869242 | 0.005778 |
| MRPL41  | 1.364327 | 1.024721 | 1.816482 | 0.033405 |
| CREB3L2 | 0.638526 | 0.385658 | 1.057193 | 0.0812   |
| P2RY8   | 0.702151 | 0.516367 | 0.954777 | 0.024127 |
| TP53TG1 | 1.17578  | 0.621872 | 2.223061 | 0.618287 |
| UNC5C   | 1.174155 | 0.90075  | 1.530548 | 0.235192 |
| TSEN54  | 0.87643  | 0.631889 | 1.215607 | 0.429394 |
| RGMA    | 0.668036 | 0.475949 | 0.937647 | 0.019692 |
| UBA7    | 1.365118 | 1.010529 | 1.844132 | 0.042538 |
| MRPS16  | 2.94033  | 1.46203  | 5.91338  | 0.002483 |
| LDOC1   | 1.140097 | 0.919912 | 1.412985 | 0.231103 |
| ARL6IP4 | 1.096529 | 0.623584 | 1.92817  | 0.748975 |
| EXT1    | 1.109564 | 0.872403 | 1.411199 | 0.396779 |
| SHMT2   | 1.439509 | 0.892674 | 2.321324 | 0.135103 |
| ATP6AP2 | 1.33755  | 0.860147 | 2.079924 | 0.196649 |
| ZAR1    | 0.994427 | 0.557634 | 1.773356 | 0.984891 |
| BACE2   | 0.958249 | 0.770713 | 1.191418 | 0.701129 |
| UBE2E2  | 1.051345 | 0.869852 | 1.270706 | 0.604557 |
| SYNM    | 0.929541 | 0.586149 | 1.474105 | 0.756135 |
| IZUMO1  | 0.590423 | 0.268364 | 1.298979 | 0.190278 |



|          |          |          |          |          |
|----------|----------|----------|----------|----------|
| B4GALNT4 | 0.98894  | 0.807018 | 1.211871 | 0.914607 |
| AP1S2    | 1.218274 | 1.010756 | 1.468398 | 0.038242 |
| DCAF4L1  | 1.586012 | 0.870942 | 2.888175 | 0.13152  |
| ZSCAN22  | 0.765348 | 0.530449 | 1.104267 | 0.152799 |
| KCNJ14   | 0.92105  | 0.635867 | 1.334136 | 0.663542 |
| FBXL6    | 1.235346 | 0.910771 | 1.675592 | 0.17415  |
| C1S      | 1.020029 | 0.796661 | 1.306024 | 0.875039 |
| GLTPD2   | 1.395774 | 0.879275 | 2.21567  | 0.15728  |
| KBTBD3   | 0.828016 | 0.465067 | 1.474219 | 0.521379 |
| CLN8     | 1.411921 | 1.003628 | 1.986314 | 0.047618 |
| PLCXD1   | 1.428898 | 0.972281 | 2.099959 | 0.069238 |
| NXPH4    | 1.0701   | 0.576526 | 1.986233 | 0.829998 |
| CACNB4   | 0.803988 | 0.644485 | 1.002968 | 0.05315  |
| TRAPPC6B | 0.691968 | 0.435061 | 1.100582 | 0.119903 |
| PGBD4    | 1.072978 | 0.699202 | 1.646565 | 0.747174 |
| NPLOC4   | 1.429764 | 0.861239 | 2.373588 | 0.166863 |
| CAPN12   | 1.301857 | 0.870242 | 1.947541 | 0.199265 |
| EXOC7    | 1.027095 | 0.651232 | 1.619889 | 0.908443 |
| KPNA2    | 1.215052 | 0.820233 | 1.799917 | 0.331273 |
| NCF1B    | 1.134678 | 0.997973 | 1.29011  | 0.053733 |
| BGN      | 0.911417 | 0.769851 | 1.079016 | 0.281497 |
| CEP97    | 0.668499 | 0.443872 | 1.006803 | 0.053915 |
| FES      | 1.215128 | 0.892335 | 1.65469  | 0.216138 |
| GLRX5    | 1.145783 | 0.747304 | 1.756738 | 0.532554 |
| FAM104B  | 1.043596 | 0.556621 | 1.956615 | 0.894142 |
| MXRA7    | 0.826428 | 0.672083 | 1.016219 | 0.070695 |
| LIMK2    | 1.559666 | 1.018567 | 2.388215 | 0.040895 |
| MFSD5    | 2.266976 | 1.301983 | 3.947197 | 0.00382  |
| ADI1     | 1.544817 | 0.894169 | 2.668914 | 0.119    |
| SPNS3    | 1.141305 | 0.97004  | 1.342807 | 0.111097 |
| SATB1    | 0.759785 | 0.530352 | 1.088471 | 0.134192 |
| CSF1R    | 1.080411 | 0.934113 | 1.249622 | 0.297488 |
| EPHB3    | 0.966831 | 0.836901 | 1.116931 | 0.646871 |
| EPGN     | 1.080747 | 0.962971 | 1.212929 | 0.187159 |
| HS3ST4   | 1.35313  | 1.043681 | 1.754329 | 0.02245  |
| TRAK1    | 0.997313 | 0.586411 | 1.696137 | 0.992077 |
| PLCB1    | 0.892467 | 0.665841 | 1.196227 | 0.446552 |
| SKA2     | 1.305281 | 0.887453 | 1.919829 | 0.175925 |
| NDN      | 1.137253 | 1.008067 | 1.282995 | 0.036568 |
| TTC3     | 0.778534 | 0.572757 | 1.058241 | 0.10993  |
| GALR2    | 0.898357 | 0.610937 | 1.320996 | 0.585849 |
| TSKU     | 0.947508 | 0.693657 | 1.294256 | 0.7347   |
| ANXA2    | 1.088575 | 0.951276 | 1.24569  | 0.217277 |
| RGS6     | 1.049725 | 0.764412 | 1.441529 | 0.764274 |
| HOXB4    | 1.142158 | 1.035506 | 1.259794 | 0.007871 |
| PAQR7    | 0.902821 | 0.613009 | 1.329647 | 0.604767 |
| PAPPA    | 1.058739 | 0.744908 | 1.504786 | 0.750331 |
| MAFA     | 1.151899 | 0.433963 | 3.057567 | 0.776474 |
| NGRN     | 0.902211 | 0.51145  | 1.591524 | 0.722331 |
| RPS17    | 1.077232 | 0.709959 | 1.634501 | 0.726552 |
| CRIP2    | 1.161211 | 0.982024 | 1.373094 | 0.080491 |
| DDX28    | 2.093492 | 1.225898 | 3.575099 | 0.006812 |
| ACBD3    | 0.701039 | 0.388647 | 1.26453  | 0.23794  |
| VMO1     | 1.199545 | 0.916164 | 1.570581 | 0.185775 |
| ALG12    | 0.835873 | 0.584052 | 1.196269 | 0.326998 |
| LCK      | 1.103877 | 0.904126 | 1.347758 | 0.331862 |
| COL18A1  | 1.077059 | 0.840161 | 1.380753 | 0.558049 |
| RBM10    | 1.290761 | 0.808416 | 2.060899 | 0.285023 |

|          |          |          |          |          |
|----------|----------|----------|----------|----------|
| GLUD2    | 1.910631 | 1.163744 | 3.136869 | 0.010484 |
| RPL35A   | 0.793875 | 0.499208 | 1.262475 | 0.329442 |
| SLC25A18 | 1.163118 | 0.447218 | 3.025019 | 0.756675 |
| ZNF721   | 0.808347 | 0.664775 | 0.982928 | 0.032961 |
| CEP63    | 0.553464 | 0.331818 | 0.923163 | 0.023436 |
| WFDC10B  | 2.521976 | 0.708453 | 8.977818 | 0.153315 |
| EWSR1    | 1.167767 | 0.607177 | 2.245936 | 0.64209  |
| ODF3L1   | 1.793562 | 1.336729 | 2.406521 | 9.82E-05 |
| HMGH4    | 1.201628 | 0.656859 | 2.198205 | 0.551132 |
| SPATA13  | 1.164775 | 0.813594 | 1.667541 | 0.404765 |
| CNOT10   | 0.834552 | 0.473017 | 1.472413 | 0.532401 |
| MTA1     | 1.130954 | 0.765947 | 1.669904 | 0.535968 |
| ZNF662   | 1.039559 | 0.886278 | 1.219351 | 0.633593 |
| CADM1    | 1.34653  | 1.057537 | 1.714497 | 0.015787 |
| ZNF320   | 0.797274 | 0.587696 | 1.081589 | 0.14541  |
| PYCR1    | 1.016571 | 0.831353 | 1.243054 | 0.872763 |
| SPNS2    | 0.943947 | 0.812703 | 1.096385 | 0.450109 |
| AP2A2    | 1.20472  | 0.840547 | 1.726673 | 0.310517 |
| SLC8A1   | 1.257296 | 1.071273 | 1.47562  | 0.005067 |
| SLC25A21 | 0.488487 | 0.246286 | 0.968873 | 0.040319 |
| ABAT     | 1.158317 | 0.791436 | 1.69527  | 0.449476 |
| SLC25A10 | 1.000438 | 0.645008 | 1.551729 | 0.998438 |
| CAMK1D   | 1.297261 | 1.080172 | 1.55798  | 0.005347 |
| LYSMD4   | 0.741882 | 0.542993 | 1.013622 | 0.060794 |
| AFMID    | 1.13013  | 0.735576 | 1.73632  | 0.576616 |
| GAS6     | 1.262108 | 1.018393 | 1.564148 | 0.033466 |
| NEB      | 0.727318 | 0.411485 | 1.285567 | 0.27326  |
| BEGAIN   | 1.015567 | 0.86413  | 1.193544 | 0.851276 |
| GPC6     | 0.884946 | 0.719243 | 1.088824 | 0.247891 |
| CSMD1    | 1.255743 | 0.903259 | 1.745778 | 0.175513 |
| GPR19    | 1.657179 | 0.984258 | 2.790164 | 0.057398 |
| RABIF    | 1.047924 | 0.598122 | 1.835987 | 0.870038 |
| TMEM119  | 0.795347 | 0.56857  | 1.112573 | 0.181203 |
| FANCF    | 1.101231 | 0.768232 | 1.578571 | 0.599683 |
| CALN1    | 1.033883 | 0.912287 | 1.171686 | 0.601697 |
| RUVBL2   | 1.131655 | 0.780726 | 1.640323 | 0.51374  |
| PTTG1IP  | 1.422503 | 0.927167 | 2.182469 | 0.106593 |
| DDX41    | 1.223673 | 0.788085 | 1.900019 | 0.368572 |
| DAZAP2   | 1.478463 | 0.898881 | 2.43175  | 0.123543 |
| ZNF623   | 0.954424 | 0.639064 | 1.425405 | 0.819693 |
| CCDC125  | 0.600864 | 0.403336 | 0.895131 | 0.012255 |
| BCOR     | 1.394479 | 0.876502 | 2.21856  | 0.160448 |
| JRKL     | 1.020727 | 0.697931 | 1.492818 | 0.915762 |
| KIAA2026 | 0.680077 | 0.413689 | 1.118    | 0.128468 |
| FHL3     | 1.190746 | 0.903489 | 1.569333 | 0.215188 |
| TMEM89   | 1.256811 | 0.765174 | 2.064333 | 0.366624 |
| SF3A3    | 1.276049 | 0.771888 | 2.109503 | 0.341882 |
| ASB7     | 1.283565 | 0.719271 | 2.29057  | 0.398208 |
| TREX2    | 1.507151 | 0.955905 | 2.376287 | 0.077423 |
| GPR132   | 1.429799 | 1.145172 | 1.78517  | 0.001595 |
| MX2      | 1.309045 | 1.049742 | 1.632401 | 0.016804 |
| EP400    | 0.922806 | 0.585824 | 1.453629 | 0.728955 |
| MEX3B    | 0.896308 | 0.764846 | 1.050366 | 0.176137 |
| PI4KAP2  | 0.947505 | 0.677943 | 1.324248 | 0.752227 |
| PSMG1    | 1.881853 | 1.136337 | 3.116476 | 0.014028 |
| KLRC4    | 1.001456 | 0.772682 | 1.297965 | 0.991227 |
| SERHL2   | 0.968134 | 0.69596  | 1.34675  | 0.84751  |
| PCBP3    | 0.823809 | 0.710966 | 0.954563 | 0.009919 |

|           |          |          |          |          |
|-----------|----------|----------|----------|----------|
| SETD3     | 1.301241 | 0.732306 | 2.312187 | 0.369319 |
| TNFAIP8L5 | 0.644159 | 0.447532 | 0.927176 | 0.017939 |
| ZNRF3     | 1.081009 | 0.790437 | 1.478397 | 0.625787 |
| SFXN4     | 0.9893   | 0.642363 | 1.523616 | 0.961059 |
| FAM167B   | 1.018165 | 0.734506 | 1.41137  | 0.91396  |
| MRPL54    | 1.333293 | 0.893349 | 1.989894 | 0.159145 |
| ZNF438    | 0.91427  | 0.718664 | 1.163116 | 0.465551 |
| CCR3      | 1.111305 | 0.816139 | 1.513223 | 0.502833 |
| ZNF530    | 1.035863 | 0.646535 | 1.659636 | 0.883519 |
| NDUFB1    | 1.912977 | 1.123964 | 3.255871 | 0.016818 |
| KLHL25    | 0.71915  | 0.50176  | 1.030727 | 0.072626 |
| TRMT12    | 0.981785 | 0.649269 | 1.484596 | 0.930569 |
| BMP8A     | 0.902478 | 0.696992 | 1.168545 | 0.436338 |
| EFHC2     | 0.941949 | 0.789585 | 1.123714 | 0.506489 |
| NOG       | 0.859337 | 0.758044 | 0.974166 | 0.017837 |
| UPP1      | 1.144736 | 0.979153 | 1.338321 | 0.089946 |
| TRIM52    | 0.858337 | 0.540657 | 1.36268  | 0.517141 |
| CMTM4     | 1.181704 | 0.967249 | 1.443707 | 0.102248 |
| TMEM50A   | 1.49182  | 0.788794 | 2.821431 | 0.2186   |
| ASCL2     | 1.117174 | 0.931797 | 1.33943  | 0.231347 |
| TBK1      | 1.190907 | 0.749977 | 1.89107  | 0.458987 |
| CBX6      | 1.162538 | 0.872464 | 1.549056 | 0.303777 |
| MACC1     | 1.107257 | 0.92778  | 1.321454 | 0.258821 |
| TBL3      | 1.423417 | 0.969501 | 2.089856 | 0.071563 |
| KREMEN1   | 0.861471 | 0.645137 | 1.150348 | 0.312185 |
| TRAIP     | 1.117854 | 0.747049 | 1.672712 | 0.587962 |
| CHEK2     | 0.973414 | 0.611487 | 1.549556 | 0.909556 |
| AIFM3     | 1.21392  | 0.999609 | 1.474177 | 0.050463 |
| ZNF703    | 1.077216 | 0.90187  | 1.286655 | 0.411904 |
| EMILIN3   | 2.472558 | 0.038097 | 160.4716 | 0.670698 |
| OLFML1    | 1.109111 | 0.745116 | 1.650921 | 0.609862 |
| RBM12B    | 0.883913 | 0.623634 | 1.252822 | 0.488061 |
| CCR4      | 1.239783 | 0.970731 | 1.583407 | 0.085074 |
| LIN9      | 0.99142  | 0.680272 | 1.444883 | 0.964236 |
| BTBD9     | 1.091957 | 0.610019 | 1.954646 | 0.767127 |
| NUDT14    | 1.470131 | 1.156808 | 1.868319 | 0.001627 |
| PNMA3     | 1.176494 | 0.946339 | 1.462625 | 0.143361 |
| IQGAP3    | 1.119978 | 0.884132 | 1.418737 | 0.347627 |
| TOB2      | 1.207149 | 0.782303 | 1.862718 | 0.39497  |
| SCN5A     | 0.749805 | 0.339444 | 1.656259 | 0.476392 |
| ARSI      | 1.817929 | 0.713538 | 4.63166  | 0.210346 |
| UTY       | 0.984792 | 0.897081 | 1.08108  | 0.747472 |
| TTC32     | 0.793662 | 0.498762 | 1.262925 | 0.32953  |
| DNAH2     | 0.679365 | 0.281115 | 1.641806 | 0.390503 |
| SH2D1A    | 1.000071 | 0.87663  | 1.140895 | 0.999152 |
| PRKX      | 0.845325 | 0.589725 | 1.211707 | 0.360364 |
| KCNH8     | 1.049323 | 0.813776 | 1.353048 | 0.710494 |
| SMTN      | 1.092725 | 0.784185 | 1.522659 | 0.600397 |
| NPW       | 0.995898 | 0.865447 | 1.146012 | 0.954244 |
| ST6GALN4  | 1.334569 | 0.895149 | 1.989696 | 0.156666 |
| PTP4A2    | 1.469866 | 0.852552 | 2.534161 | 0.165759 |
| ACTG1     | 1.138609 | 0.813595 | 1.593459 | 0.449066 |
| DENND5A   | 0.89421  | 0.614796 | 1.300612 | 0.558579 |
| DIABLO    | 0.584321 | 0.348215 | 0.980518 | 0.041905 |
| VPS33B    | 1.945885 | 0.931632 | 4.06434  | 0.076475 |
| TBX1      | 0.677598 | 0.544663 | 0.842979 | 0.000478 |
| ADAP2     | 1.150743 | 1.002321 | 1.321142 | 0.046275 |
| FAM120C   | 0.656567 | 0.406929 | 1.059348 | 0.084752 |

|          |          |          |          |          |
|----------|----------|----------|----------|----------|
| BRD7P2   | 0.972964 | 0.535455 | 1.767951 | 0.928328 |
| EIF3C    | 0.96357  | 0.594738 | 1.561134 | 0.880181 |
| CLDN5    | 0.96342  | 0.739246 | 1.255574 | 0.782727 |
| NIPSNAP1 | 1.173907 | 0.816262 | 1.688256 | 0.387112 |
| LRTOMT   | 0.813284 | 0.576776 | 1.146773 | 0.238469 |
| ADRA2C   | 1.011468 | 0.854339 | 1.197495 | 0.894691 |
| NR2C2AP  | 1.610765 | 0.944078 | 2.748252 | 0.080317 |
| CRELD2   | 1.042558 | 0.781289 | 1.391197 | 0.777061 |
| SCFD2    | 1.206753 | 0.74875  | 1.944911 | 0.440264 |
| UBE2F    | 1.02661  | 0.669308 | 1.574652 | 0.904224 |
| KCNJ12   | 1.007742 | 0.788949 | 1.287211 | 0.950756 |
| GPR173   | 0.996794 | 0.871887 | 1.139595 | 0.962503 |
| PPP1R2   | 1.655941 | 0.985442 | 2.782649 | 0.056834 |
| TSPYL2   | 1.078518 | 0.848679 | 1.370602 | 0.53647  |
| PGP      | 1.37687  | 0.964047 | 1.966471 | 0.078642 |
| SNRNP35  | 1.01498  | 0.478173 | 2.15442  | 0.969113 |
| IRAK1    | 1.90553  | 1.332802 | 2.724368 | 0.000408 |
| OLIG1    | 0.961162 | 0.844885 | 1.093441 | 0.547092 |
| PCDH9    | 0.897501 | 0.705635 | 1.141537 | 0.378188 |
| ACOT1    | 1.656883 | 1.03372  | 2.655711 | 0.035928 |
| OAF      | 1.027963 | 0.784215 | 1.347472 | 0.841701 |
| KCNK12   | 0.90804  | 0.665845 | 1.238329 | 0.542221 |
| POU6F1   | 0.815424 | 0.629381 | 1.056461 | 0.12252  |
| TM2D3    | 0.996833 | 0.550059 | 1.80649  | 0.991657 |
| TSSC4    | 1.312405 | 0.897417 | 1.919294 | 0.160959 |
| TACSTD2  | 0.90494  | 0.78657  | 1.041122 | 0.162553 |
| CLECL1   | 0.980001 | 0.854397 | 1.12407  | 0.772828 |
| ZDHHC23  | 0.900554 | 0.723915 | 1.120293 | 0.347073 |
| SRPK3    | 1.188005 | 0.841056 | 1.678078 | 0.328247 |
| EFNA5    | 1.344951 | 0.576411 | 3.1382   | 0.493005 |
| PKP3     | 0.762743 | 0.456452 | 1.274561 | 0.301197 |
| MAP7D2   | 1.583366 | 1.210012 | 2.071921 | 0.00081  |
| CSF1     | 1.169015 | 0.981714 | 1.39205  | 0.079633 |
| PLA2G6   | 1.147983 | 0.841688 | 1.565742 | 0.383453 |
| MAML2    | 0.945579 | 0.758592 | 1.178657 | 0.618645 |
| A3GALT2  | 1.05974  | 0.768965 | 1.460467 | 0.722908 |
| SS18L1   | 0.587304 | 0.338602 | 1.018676 | 0.05821  |
| TOP1MT   | 1.460034 | 1.117613 | 1.907367 | 0.005513 |
| COPB2    | 0.892126 | 0.577803 | 1.37744  | 0.606516 |
| LRRC19   | 0.601155 | 0.40316  | 0.896386 | 0.01254  |
| THAP7    | 2.020075 | 1.277944 | 3.193177 | 0.002614 |
| KNTC1    | 0.873658 | 0.626686 | 1.217958 | 0.425576 |
| CCR10    | 1.729405 | 1.027145 | 2.911802 | 0.03933  |
| WDR27    | 0.671796 | 0.472894 | 0.954358 | 0.026367 |
| TXNRD2   | 1.389942 | 0.841258 | 2.296487 | 0.19871  |
| FOXO4    | 1.172219 | 0.742046 | 1.851767 | 0.495798 |
| PTP4A3   | 1.506772 | 1.276771 | 1.778205 | 1.23E-06 |
| FOXD4L1  | 0.972315 | 0.626315 | 1.509458 | 0.900435 |
| PROS1    | 1.047862 | 0.855401 | 1.283627 | 0.651605 |
| GAST     | 1.373909 | 0.353971 | 5.332709 | 0.646178 |
| HDDC3    | 1.758731 | 0.947262 | 3.265341 | 0.073719 |
| BEX5     | 1.137354 | 0.890857 | 1.452055 | 0.301758 |
| ZFP1     | 0.857454 | 0.57396  | 1.280973 | 0.452712 |
| CEND1    | 1.0083   | 0.648203 | 1.56844  | 0.970751 |
| DUSP8    | 1.352983 | 1.023656 | 1.788261 | 0.033649 |
| SOCS3    | 0.910636 | 0.772815 | 1.073036 | 0.263546 |
| LPAR5    | 0.973449 | 0.787903 | 1.20269  | 0.803046 |
| XPOT     | 0.699882 | 0.479117 | 1.022371 | 0.064959 |

|           |          |          |          |          |
|-----------|----------|----------|----------|----------|
| PDE4B     | 0.936696 | 0.766094 | 1.14529  | 0.523789 |
| SNN       | 1.366557 | 1.036818 | 1.801164 | 0.026651 |
| KCNH7     | 0.723402 | 0.282141 | 1.854784 | 0.500307 |
| NELL2     | 0.830874 | 0.633517 | 1.089714 | 0.18056  |
| KRBA2     | 0.777897 | 0.542155 | 1.116145 | 0.172737 |
| MED12     | 0.862762 | 0.605436 | 1.229457 | 0.414007 |
| ZNF93     | 0.831425 | 0.58081  | 1.190177 | 0.313118 |
| CDCA2     | 0.970354 | 0.741225 | 1.270313 | 0.826669 |
| ZBTB40    | 0.89862  | 0.610532 | 1.322647 | 0.5878   |
| EIF4ENIF1 | 0.950811 | 0.547653 | 1.650758 | 0.857781 |
| LRRC26    | 0.837285 | 0.589871 | 1.188474 | 0.320345 |
| ATL3      | 0.968526 | 0.616776 | 1.520879 | 0.889531 |
| NDUFA12   | 1.879882 | 1.135979 | 3.110935 | 0.014047 |
| TCTE3     | 1.066947 | 0.624074 | 1.824103 | 0.81279  |
| UBE2G2    | 1.753366 | 1.005656 | 3.057004 | 0.047721 |
| OSBP2     | 0.97759  | 0.817524 | 1.168995 | 0.803797 |
| APOO      | 1.431776 | 0.835727 | 2.452935 | 0.19133  |
| PRR16     | 1.0368   | 0.909586 | 1.181806 | 0.588444 |
| TMED9     | 1.154716 | 0.684531 | 1.947858 | 0.58973  |
| TMEM186   | 1.454735 | 0.818694 | 2.584914 | 0.201275 |
| SDR42E1   | 1.328888 | 1.001698 | 1.762948 | 0.04864  |
| RBM33     | 0.729194 | 0.454546 | 1.169793 | 0.190321 |
| ARMCX2    | 1.075883 | 0.843087 | 1.372959 | 0.556573 |
| BTBD6     | 1.116958 | 0.738724 | 1.688853 | 0.600032 |
| RBM43     | 0.946173 | 0.643611 | 1.390969 | 0.778378 |
| SUMO3     | 2.235476 | 1.429143 | 3.496749 | 0.000425 |
| IMMP2L    | 0.789162 | 0.544294 | 1.14419  | 0.211558 |
| JAG2      | 1.460527 | 0.970395 | 2.198218 | 0.069386 |
| FMNL1     | 1.257804 | 0.915027 | 1.728986 | 0.157675 |
| LCN12     | 1.373061 | 0.955328 | 1.973456 | 0.086706 |
| WT1       | 0.822924 | 0.697438 | 0.970989 | 0.020959 |
| ZFP90     | 1.223493 | 0.870416 | 1.719791 | 0.245605 |
| MUC6      | 0.767266 | 0.556272 | 1.058289 | 0.106382 |
| NOC4L     | 1.546936 | 1.009381 | 2.37077  | 0.045196 |
| USP18     | 1.234447 | 1.028615 | 1.481467 | 0.023629 |
| NDUFA6    | 2.369376 | 1.328867 | 4.22461  | 0.00346  |
| CHRM5     | 0.376013 | 0.195724 | 0.722375 | 0.003323 |
| SORCS2    | 1.159793 | 0.969109 | 1.387997 | 0.105754 |
| TMEM121   | 1.194851 | 1.029855 | 1.386282 | 0.018876 |
| TMEM106   | 0.646432 | 0.433243 | 0.964527 | 0.032609 |
| SIVA1     | 1.058317 | 0.746142 | 1.501101 | 0.750607 |
| BRI3BP    | 0.848679 | 0.58668  | 1.22768  | 0.383744 |
| DGAT1     | 1.420889 | 1.013949 | 1.991151 | 0.041308 |
| ROBO2     | 1.363582 | 0.674742 | 2.755655 | 0.387622 |
| AP3M1     | 1.568261 | 0.887984 | 2.769692 | 0.121003 |
| F8        | 1.638463 | 0.984167 | 2.727748 | 0.057618 |
| CA13      | 1.308654 | 1.029843 | 1.662948 | 0.02777  |
| UBOX5     | 0.913202 | 0.529648 | 1.574515 | 0.743905 |
| MAFF      | 1.065788 | 0.839857 | 1.352497 | 0.600159 |
| BRF1      | 1.332378 | 0.876194 | 2.026072 | 0.179623 |
| SEMA4B    | 0.985778 | 0.737393 | 1.317831 | 0.922963 |
| CIB1      | 1.205339 | 0.838658 | 1.732342 | 0.312885 |
| SLC24A3   | 0.809437 | 0.716553 | 0.91436  | 0.000675 |
| INTS5     | 1.7287   | 1.070213 | 2.792343 | 0.025265 |
| RPS27L    | 1.159608 | 0.74221  | 1.811737 | 0.5154   |
| MANEAL    | 0.999886 | 0.815732 | 1.225612 | 0.999123 |
| ANO9      | 1.292495 | 1.045514 | 1.597819 | 0.017724 |
| FAF1      | 1.121848 | 0.65598  | 1.918568 | 0.674515 |

|           |          |          |          |          |
|-----------|----------|----------|----------|----------|
| FAM43A    | 0.96049  | 0.794529 | 1.161118 | 0.677041 |
| HSF1      | 1.522655 | 1.009376 | 2.296942 | 0.045021 |
| PURA      | 1.109064 | 0.844412 | 1.456662 | 0.456764 |
| INPP5J    | 1.040236 | 0.780536 | 1.386344 | 0.787787 |
| MIXL1     | 1.177666 | 0.808136 | 1.716167 | 0.394666 |
| MFSD6L    | 0.89524  | 0.679375 | 1.179695 | 0.431817 |
| LRRC37B   | 0.507995 | 0.34027  | 0.758393 | 0.000924 |
| DDX51     | 1.169318 | 0.762285 | 1.793694 | 0.473653 |
| NOMO2     | 0.84111  | 0.581816 | 1.215961 | 0.357493 |
| SIGIRR    | 1.339658 | 0.922906 | 1.9446   | 0.124051 |
| NRBP2     | 1.388156 | 1.139922 | 1.690447 | 0.001103 |
| IFITM2    | 1.118007 | 0.868782 | 1.438725 | 0.386023 |
| TNFAIP2   | 1.233798 | 1.071852 | 1.420212 | 0.003428 |
| ZNF445    | 0.632129 | 0.447122 | 0.893687 | 0.009426 |
| PGBD2     | 1.007397 | 0.689327 | 1.472231 | 0.96963  |
| RAB11B    | 1.326792 | 0.90625  | 1.942487 | 0.145993 |
| PRMT3     | 0.886503 | 0.54839  | 1.433083 | 0.622998 |
| GP1BA     | 1.178175 | 0.912865 | 1.520593 | 0.20781  |
| PRPF39    | 0.700819 | 0.429892 | 1.142491 | 0.153946 |
| PPIL6     | 1.141705 | 0.838855 | 1.553891 | 0.399422 |
| ZNF74     | 0.883926 | 0.63918  | 1.222388 | 0.455705 |
| CDNF      | 1.004225 | 0.655884 | 1.53757  | 0.984523 |
| KLHL33    | 1.056122 | 0.897877 | 1.242258 | 0.509704 |
| RBM11     | 1.123602 | 0.754592 | 1.673064 | 0.566149 |
| GALNT17   | 0.61246  | 0.084317 | 4.448792 | 0.627961 |
| ZBTB37    | 1.011652 | 0.73204  | 1.398066 | 0.944046 |
| IL3RA     | 1.522154 | 1.117094 | 2.074091 | 0.007781 |
| CCDC137   | 2.192881 | 1.283739 | 3.745874 | 0.00405  |
| RGPD2     | 1.06445  | 0.654461 | 1.731277 | 0.801292 |
| ARL15     | 0.848535 | 0.596375 | 1.207313 | 0.361316 |
| CDK10     | 1.303408 | 0.872334 | 1.947505 | 0.195898 |
| TMEM105   | 1.179531 | 1.019302 | 1.364947 | 0.026649 |
| SOCS1     | 1.602706 | 1.281091 | 2.005062 | 3.67E-05 |
| TCN2      | 1.104702 | 0.962261 | 1.268229 | 0.157429 |
| GAS2L1    | 1.028874 | 0.871354 | 1.21487  | 0.737065 |
| ATP6V0A2  | 0.694052 | 0.471072 | 1.022579 | 0.064741 |
| HGS       | 1.307914 | 0.911844 | 1.876022 | 0.144694 |
| TNFAIP8L1 | 1.090709 | 0.662354 | 1.796091 | 0.73296  |
| MAPK11    | 0.890924 | 0.71381  | 1.111983 | 0.307098 |
| SP140L    | 1.312282 | 0.825364 | 2.086454 | 0.250675 |
| MRPL30    | 0.907454 | 0.510112 | 1.614299 | 0.74107  |
| SMYD3     | 1.020804 | 0.729089 | 1.429235 | 0.904553 |
| METTL7A   | 1.374713 | 1.00594  | 1.878677 | 0.045811 |
| FAM174B   | 1.012198 | 0.733111 | 1.397531 | 0.941276 |
| TMEM179I  | 1.542058 | 0.930041 | 2.556815 | 0.093184 |
| GPRIN3    | 1.164435 | 0.967348 | 1.401677 | 0.107599 |
| STAC3     | 1.407754 | 1.077556 | 1.839136 | 0.012153 |
| MUC1      | 1.081583 | 0.815452 | 1.434567 | 0.586284 |
| IRF7      | 1.306233 | 1.060677 | 1.608639 | 0.011924 |
| BRCC3     | 1.237701 | 0.774468 | 1.978009 | 0.372653 |
| PDE6G     | 1.104111 | 0.878318 | 1.38795  | 0.396182 |
| NR2F2     | 0.899424 | 0.548379 | 1.47519  | 0.674563 |
| DLK1      | 0.869466 | 0.760598 | 0.993918 | 0.040428 |
| AHNAK2    | 1.191987 | 0.955409 | 1.487147 | 0.119744 |
| OLFML2A   | 1.248828 | 1.111225 | 1.403471 | 0.000191 |
| SP1       | 1.39608  | 0.824269 | 2.364564 | 0.214562 |
| WASH3P    | 0.965741 | 0.673839 | 1.384092 | 0.849435 |
| MRPL40    | 3.020208 | 1.417905 | 6.433194 | 0.004169 |

|          |          |          |          |          |
|----------|----------|----------|----------|----------|
| PDIA2    | 0.882032 | 0.614699 | 1.265627 | 0.495655 |
| PCGF3    | 0.612311 | 0.378395 | 0.990829 | 0.045773 |
| LMLN     | 0.886078 | 0.671849 | 1.168618 | 0.391717 |
| P4HB     | 0.839341 | 0.662651 | 1.063144 | 0.146435 |
| PSMD13   | 2.681311 | 1.330351 | 5.404161 | 0.005812 |
| PBX1     | 0.850525 | 0.658802 | 1.098044 | 0.214129 |
| NDUFA4L2 | 1.023457 | 0.62076  | 1.687392 | 0.927581 |
| ZFP36L1  | 0.953141 | 0.800227 | 1.135276 | 0.59064  |
| UBE2L3   | 3.506161 | 1.632551 | 7.530036 | 0.001296 |
| BRWD1    | 0.656183 | 0.433204 | 0.993935 | 0.046737 |
| SNAI3    | 1.142247 | 0.835209 | 1.562158 | 0.405057 |
| ZBTB3    | 1.225719 | 0.783837 | 1.916706 | 0.372261 |
| LYG2     | 0.75857  | 0.559823 | 1.027875 | 0.074652 |
| PRAME    | 0.973935 | 0.888023 | 1.068158 | 0.575109 |
| MYBL1    | 1.232642 | 0.937341 | 1.620976 | 0.134427 |
| DRG1     | 1.538795 | 0.833564 | 2.840682 | 0.16822  |
| ANKFY1   | 0.735544 | 0.55422  | 0.976192 | 0.033435 |
| YTHDF3   | 0.521088 | 0.312901 | 0.867793 | 0.012249 |
| ZNF696   | 1.123255 | 0.764441 | 1.65049  | 0.553882 |
| ADARB2   | 1.009399 | 0.781913 | 1.303069 | 0.942761 |
| IFIT1    | 1.281965 | 1.070729 | 1.534875 | 0.006854 |
| KCNQ5    | 0.839447 | 0.71603  | 0.984136 | 0.031001 |
| MORF4L1  | 0.716611 | 0.413441 | 1.242089 | 0.23506  |
| NLRP9    | 0.893122 | 0.380109 | 2.098521 | 0.795379 |
| WDR53    | 1.617869 | 0.799507 | 3.273893 | 0.18097  |
| DMWD     | 0.991442 | 0.762955 | 1.288356 | 0.948729 |
| PIGP     | 0.844241 | 0.541256 | 1.31683  | 0.455361 |
| IKZF1    | 1.622205 | 0.980316 | 2.684389 | 0.059755 |
| PCYT2    | 1.034699 | 0.736791 | 1.45306  | 0.843915 |
| NAT8L    | 0.815544 | 0.61035  | 1.089722 | 0.167925 |
| BCAP31   | 1.940653 | 1.122405 | 3.355414 | 0.01763  |
| GNB1L    | 0.671265 | 0.51962  | 0.867165 | 0.002282 |
| DNAH14   | 0.948711 | 0.706191 | 1.274517 | 0.726675 |
| EVI2B    | 1.043777 | 0.810113 | 1.344838 | 0.740368 |
| ZNF829   | 0.880762 | 0.611731 | 1.268111 | 0.494779 |
| THNSL1   | 0.915377 | 0.692221 | 1.210474 | 0.535139 |
| TRIM69   | 1.487759 | 1.010964 | 2.189424 | 0.043876 |
| ATP6V0C  | 1.051185 | 0.80922  | 1.365501 | 0.708409 |
| IFITM1   | 1.015119 | 0.858012 | 1.200992 | 0.861147 |
| LAMP1    | 0.99346  | 0.610501 | 1.616643 | 0.978928 |
| TAS2R60  | 1.029859 | 0.868905 | 1.220627 | 0.734367 |
| KLHDC8B  | 1.022528 | 0.846128 | 1.235703 | 0.817639 |
| SETD4    | 1.251303 | 0.696136 | 2.249212 | 0.453667 |
| PTCH1    | 0.764857 | 0.598469 | 0.977504 | 0.032213 |
| RNPC3    | 0.831212 | 0.582891 | 1.185323 | 0.307254 |
| ZNF267   | 1.059411 | 0.669117 | 1.677362 | 0.805553 |
| IRS2     | 0.927739 | 0.77592  | 1.109262 | 0.410709 |
| BICD2    | 1.282809 | 0.844104 | 1.949522 | 0.243493 |
| CCIN     | 1.104671 | 0.836479 | 1.45885  | 0.482942 |
| TMLHE    | 1.158147 | 0.698137 | 1.921264 | 0.569679 |
| SDHAP3   | 1.381346 | 1.136211 | 1.679369 | 0.001191 |
| RASA3    | 1.550029 | 1.153356 | 2.083128 | 0.003661 |
| LRCH3    | 0.625798 | 0.367351 | 1.066075 | 0.084608 |
| NDUFA13  | 0.914003 | 0.56807  | 1.470596 | 0.710953 |
| ZNF566   | 0.734722 | 0.528363 | 1.021675 | 0.066878 |
| ZNF529   | 0.677933 | 0.474106 | 0.969391 | 0.033143 |
| ZNF284   | 0.724463 | 0.443036 | 1.184658 | 0.198928 |
| DLEU7    | 0.838886 | 0.57214  | 1.229994 | 0.36825  |

|          |          |          |          |          |
|----------|----------|----------|----------|----------|
| KRT73    | 1.224772 | 0.936573 | 1.601654 | 0.138541 |
| AIDA     | 1.299493 | 0.798654 | 2.114409 | 0.291534 |
| CD300LF  | 1.410896 | 1.140409 | 1.745539 | 0.001525 |
| CYP2R1   | 0.78723  | 0.495119 | 1.25168  | 0.311945 |
| LRRC70   | 0.937514 | 0.711693 | 1.234988 | 0.646312 |
| ANKRD46  | 0.701923 | 0.477385 | 1.032073 | 0.071946 |
| PIP5K1C  | 1.351898 | 0.91114  | 2.00587  | 0.13421  |
| CYP4F2   | 0.739968 | 0.614733 | 0.890717 | 0.001456 |
| ZBTB6    | 1.248331 | 0.884268 | 1.762281 | 0.207373 |
| TAS2R42  | 0.85445  | 0.544495 | 1.340847 | 0.493852 |
| POLR3C   | 1.078228 | 0.633839 | 1.834182 | 0.781117 |
| WWOX     | 0.903469 | 0.565294 | 1.443951 | 0.671332 |
| BCL9L    | 1.118201 | 0.838332 | 1.491501 | 0.447168 |
| POLR1D   | 1.549303 | 0.749313 | 3.203387 | 0.237493 |
| KIF18B   | 0.988645 | 0.772479 | 1.265301 | 0.927718 |
| ZNRF1    | 0.731763 | 0.55504  | 0.964755 | 0.026803 |
| CYP4F12  | 0.883547 | 0.465371 | 1.67749  | 0.705053 |
| ZNF749   | 0.800289 | 0.57834  | 1.107414 | 0.178848 |
| BTLA     | 0.965688 | 0.806527 | 1.156257 | 0.703976 |
| ZNF17    | 0.778792 | 0.535569 | 1.132472 | 0.19062  |
| GPAT2    | 1.315773 | 1.024238 | 1.690289 | 0.031764 |
| TOR3A    | 2.00629  | 1.183991 | 3.399688 | 0.009664 |
| PPP1CC   | 1.488277 | 0.915015 | 2.420691 | 0.109132 |
| ZNF555   | 0.729967 | 0.560634 | 0.950445 | 0.019419 |
| NAP1L3   | 0.979345 | 0.736342 | 1.302542 | 0.885943 |
| PRELID2  | 0.755368 | 0.549806 | 1.037785 | 0.083432 |
| BACE1    | 0.956498 | 0.693357 | 1.319504 | 0.78643  |
| RGS9BP   | 0.588596 | 0.430202 | 0.805309 | 0.000921 |
| SLC36A3  | 1.014895 | 0.231068 | 4.45762  | 0.984376 |
| RXRA     | 1.158113 | 0.956726 | 1.401891 | 0.132046 |
| ANKRD37  | 1.117304 | 0.72188  | 1.729328 | 0.618706 |
| NUDT17   | 1.215177 | 0.781304 | 1.889989 | 0.387134 |
| ZNF75D   | 0.990744 | 0.694388 | 1.413581 | 0.959103 |
| KRT10    | 1.360744 | 0.901089 | 2.054874 | 0.142999 |
| CD300E   | 1.084702 | 1.002691 | 1.173421 | 0.042666 |
| NKRF     | 1.49389  | 0.842084 | 2.650217 | 0.169962 |
| GLDN     | 1.223074 | 0.965881 | 1.548753 | 0.094571 |
| FCAR     | 1.063182 | 0.949317 | 1.190704 | 0.289128 |
| KPNA4    | 1.234631 | 0.705899 | 2.159395 | 0.459946 |
| ZNF501   | 1.006132 | 0.731085 | 1.384657 | 0.970069 |
| ZNF197   | 0.725456 | 0.520517 | 1.011083 | 0.058107 |
| SPATA12  | 0.790126 | 0.448711 | 1.391316 | 0.414509 |
| AQP7P1   | 1.53885  | 1.126261 | 2.102586 | 0.006798 |
| RPS23    | 0.990409 | 0.699395 | 1.402512 | 0.956701 |
| GNG2     | 0.773931 | 0.643307 | 0.931078 | 0.006586 |
| BTN3A2   | 1.203303 | 0.918909 | 1.575715 | 0.178545 |
| AKAP14   | 0.82112  | 0.333615 | 2.021004 | 0.668012 |
| INSIG1   | 1.036346 | 0.690341 | 1.555772 | 0.863255 |
| ZNF396   | 0.952755 | 0.4778   | 1.899838 | 0.890682 |
| TMEM222  | 1.391771 | 0.899804 | 2.152722 | 0.137405 |
| ARHGAP30 | 1.797773 | 1.262168 | 2.560665 | 0.001154 |
| CYP4F3   | 0.92081  | 0.790186 | 1.073026 | 0.290524 |
| SMYD4    | 0.949815 | 0.618787 | 1.45793  | 0.813817 |
| GPATCH8  | 0.829178 | 0.499287 | 1.377037 | 0.4692   |
| CEACAM1  | 1.013744 | 0.833861 | 1.232433 | 0.891057 |
| NF2      | 1.194906 | 0.627722 | 2.274574 | 0.587704 |
| SPATC1   | 1.268913 | 1.019449 | 1.579422 | 0.032971 |
| UBE2H    | 0.996167 | 0.622503 | 1.594126 | 0.987226 |



|          |          |          |          |          |
|----------|----------|----------|----------|----------|
| HPDL     | 1.313002 | 0.941785 | 1.830541 | 0.108231 |
| KATNA1   | 1.084035 | 0.576197 | 2.039461 | 0.802403 |
| ARAP1    | 1.478824 | 1.136905 | 1.923573 | 0.003541 |
| KIF24    | 0.959769 | 0.681449 | 1.351763 | 0.814209 |
| PDE2A    | 1.169675 | 0.836352 | 1.635843 | 0.359789 |
| PRG2     | 1.020897 | 0.738618 | 1.411055 | 0.900332 |
| PRR5     | 1.119655 | 0.864185 | 1.450648 | 0.392378 |
| ZFP91    | 0.907862 | 0.513009 | 1.606627 | 0.739955 |
| BCDIN3D  | 1.377513 | 0.799082 | 2.374655 | 0.249027 |
| LYRM7    | 0.752283 | 0.543563 | 1.041149 | 0.086025 |
| BCR      | 0.879414 | 0.6847   | 1.129501 | 0.314267 |
| FSCN2    | 0.945806 | 0.653355 | 1.369162 | 0.767829 |
| SPIN4    | 0.771358 | 0.611289 | 0.973342 | 0.028694 |
| SPIN2B   | 1.111882 | 0.68018  | 1.81758  | 0.672329 |
| HYAL3    | 0.928709 | 0.767634 | 1.123583 | 0.446652 |
| CXCR3    | 1.231468 | 0.990918 | 1.530413 | 0.060424 |
| ZNF397   | 0.813922 | 0.563495 | 1.175644 | 0.272446 |
| TPCN1    | 0.890043 | 0.699105 | 1.133129 | 0.344405 |
| LILRB4   | 1.188789 | 1.069602 | 1.321257 | 0.001335 |
| TNFRSF4  | 0.96813  | 0.851    | 1.101381 | 0.622519 |
| HEXIM1   | 2.467115 | 1.52211  | 3.998826 | 0.000247 |
| PDZD7    | 1.409813 | 1.119609 | 1.775237 | 0.003492 |
| POFUT2   | 1.018438 | 0.676017 | 1.534304 | 0.93037  |
| ERCC6L   | 1.044317 | 0.741944 | 1.469919 | 0.803652 |
| TMEM17   | 0.825065 | 0.606921 | 1.121614 | 0.219672 |
| TNFRSF18 | 1.008914 | 0.881908 | 1.154211 | 0.897133 |
| RTN4RL2  | 0.818575 | 0.565422 | 1.18507  | 0.28893  |
| ZDHHC17  | 0.725007 | 0.461597 | 1.138732 | 0.162718 |
| P2RY4    | 0.984797 | 0.65928  | 1.471035 | 0.940353 |
| ZNF395   | 0.849806 | 0.599737 | 1.204145 | 0.360063 |
| ZACN     | 0.915673 | 0.510101 | 1.643709 | 0.767897 |
| PPARA    | 1.031749 | 0.708526 | 1.502423 | 0.870518 |
| KANK3    | 0.704926 | 0.46395  | 1.071064 | 0.101359 |
| EMID1    | 0.953465 | 0.83565  | 1.087891 | 0.478867 |
| ACTL7A   | 0.847669 | 0.343432 | 2.092241 | 0.719961 |
| RHD      | 0.969877 | 0.830274 | 1.132955 | 0.699703 |
| ESPN     | 1.112687 | 0.885497 | 1.398167 | 0.359483 |
| GPR141   | 0.949194 | 0.795638 | 1.132386 | 0.562509 |
| TMPRSS6  | 2.638531 | 1.306948 | 5.326793 | 0.006794 |
| TMEM216  | 0.876149 | 0.626831 | 1.224632 | 0.438995 |
| RPS19BP1 | 1.550298 | 1.010395 | 2.378697 | 0.044717 |
| TEAD1    | 1.005317 | 0.62449  | 1.618382 | 0.982582 |
| OR2AK2   | 0.965393 | 0.748538 | 1.245073 | 0.78614  |
| PLCD1    | 1.042743 | 0.729983 | 1.489504 | 0.818051 |
| ENTPD5   | 0.841967 | 0.541597 | 1.30892  | 0.444796 |
| MITF     | 1.027992 | 0.776187 | 1.361485 | 0.847287 |
| HEATR4   | 0.826569 | 0.537791 | 1.270411 | 0.385087 |
| NAP1L1   | 0.940423 | 0.657895 | 1.344282 | 0.736146 |
| LILRA5   | 1.134083 | 1.031147 | 1.247294 | 0.009549 |
| CMC1     | 0.947715 | 0.452727 | 1.983895 | 0.886707 |
| SLIT1    | 1.282939 | 0.914588 | 1.799644 | 0.149046 |
| AKR1C1   | 1.122025 | 0.894302 | 1.407734 | 0.319848 |
| SPATA21  | 0.746484 | 0.455047 | 1.224572 | 0.246964 |
| RNF220   | 1.285076 | 0.915398 | 1.804045 | 0.147278 |
| ZNF546   | 0.815086 | 0.537621 | 1.235748 | 0.335551 |
| TSPYL4   | 0.832838 | 0.566952 | 1.223418 | 0.351209 |
| MT1X     | 1.428613 | 1.021839 | 1.997316 | 0.036949 |
| GCNT1    | 0.8436   | 0.649015 | 1.096526 | 0.203651 |

|          |          |          |          |          |
|----------|----------|----------|----------|----------|
| SESTD1   | 0.979284 | 0.807277 | 1.187941 | 0.831783 |
| FNBP1    | 1.152896 | 0.729119 | 1.82298  | 0.54279  |
| DYNC2H1  | 0.74929  | 0.538313 | 1.042954 | 0.087138 |
| BCAM     | 0.990463 | 0.808479 | 1.213411 | 0.926291 |
| RSBN1L   | 0.604918 | 0.369616 | 0.990017 | 0.045513 |
| WDR86    | 1.118358 | 0.923691 | 1.354049 | 0.251612 |
| EPOR     | 1.07058  | 0.889165 | 1.289009 | 0.47157  |
| TAF9B    | 1.010936 | 0.610313 | 1.674537 | 0.966307 |
| PCDHB13  | 0.790495 | 0.545469 | 1.145588 | 0.214256 |
| FPR3     | 1.184347 | 0.956849 | 1.465934 | 0.120029 |
| KCNJ11   | 0.633392 | 0.433662 | 0.925109 | 0.018142 |
| COL4A1   | 0.865229 | 0.596361 | 1.255316 | 0.445821 |
| GJA4     | 1.089143 | 0.881043 | 1.346396 | 0.429937 |
| PTMA     | 0.974834 | 0.545462 | 1.742196 | 0.931437 |
| HSPA14   | 1.288147 | 0.718623 | 2.30903  | 0.395142 |
| SIRT7    | 1.062184 | 0.700747 | 1.610046 | 0.7762   |
| IFT140   | 1.032066 | 0.722587 | 1.474092 | 0.862233 |
| TLR5     | 1.139946 | 0.989999 | 1.312604 | 0.068716 |
| USP7     | 1.021793 | 0.609702 | 1.712413 | 0.934778 |
| NANOS3   | 0.826917 | 0.624674 | 1.094639 | 0.184153 |
| NHLRC1   | 1.35588  | 1.04447  | 1.760138 | 0.022209 |
| COX8C    | 1.222191 | 0.783456 | 1.906617 | 0.376508 |
| PLEKHN1  | 1.206826 | 0.883928 | 1.647678 | 0.236674 |
| ZNF385C  | 0.710266 | 0.577068 | 0.87421  | 0.001244 |
| MAGEH1   | 0.96294  | 0.698698 | 1.327117 | 0.817516 |
| TET3     | 0.687794 | 0.454472 | 1.040901 | 0.07667  |
| ZNF286A  | 1.094395 | 0.754416 | 1.587587 | 0.634621 |
| ISG15    | 1.413055 | 1.138068 | 1.754487 | 0.001741 |
| EXD3     | 1.006896 | 0.755825 | 1.341366 | 0.962546 |
| ZKSCAN4  | 0.904182 | 0.626944 | 1.304015 | 0.589792 |
| DHRS4L2  | 1.724659 | 1.062985 | 2.798204 | 0.02729  |
| SAMD11   | 0.693384 | 0.567763 | 0.846799 | 0.00033  |
| VMAC     | 0.801461 | 0.493173 | 1.302464 | 0.371684 |
| SPRY4    | 1.457817 | 1.01679  | 2.090136 | 0.040311 |
| TRPV2    | 1.342314 | 1.003544 | 1.795443 | 0.047278 |
| TMEM203  | 2.352665 | 1.227044 | 4.51087  | 0.009994 |
| KBTBD12  | 1.168692 | 0.901963 | 1.514298 | 0.238262 |
| DNAJB13  | 1.631248 | 1.135905 | 2.3426   | 0.008048 |
| TCEA1    | 1.066295 | 0.686834 | 1.6554   | 0.774858 |
| NHEJ1    | 1.069892 | 0.57331  | 1.996596 | 0.831925 |
| FANCA    | 1.093916 | 0.768783 | 1.556553 | 0.617918 |
| SECISBP2 | 0.723791 | 0.478313 | 1.095251 | 0.126147 |
| OR52B6   | 0.852976 | 0.612745 | 1.187391 | 0.346062 |
| SEMA4D   | 1.624736 | 1.057089 | 2.497202 | 0.026889 |
| LIN28B   | 0.04063  | 2.70E-09 | 611531.9 | 0.704035 |
| DNAH17   | 0.882632 | 0.532179 | 1.463867 | 0.628629 |
| MCRS1    | 1.869723 | 1.176156 | 2.972281 | 0.008145 |
| TMEM72   | 1.065062 | 0.7411   | 1.530639 | 0.733357 |
| FANCM    | 0.894826 | 0.578306 | 1.384583 | 0.617816 |
| ZNF70    | 0.790918 | 0.581447 | 1.075853 | 0.135121 |
| CARD9    | 1.008951 | 0.841565 | 1.20963  | 0.923298 |
| PEAR1    | 1.176205 | 1.034353 | 1.337512 | 0.013321 |
| TMEM220  | 0.782791 | 0.555097 | 1.103882 | 0.162593 |
| EIF4EBP1 | 1.562912 | 1.092017 | 2.236865 | 0.014639 |
| P2RX2    | 0.780226 | 0.538121 | 1.131258 | 0.190433 |
| TTC24    | 1.122561 | 0.94392  | 1.33501  | 0.191097 |
| FAM122A  | 1.305228 | 0.810288 | 2.102487 | 0.273464 |
| CLEC17A  | 1.112346 | 0.811541 | 1.524648 | 0.508058 |

|          |          |          |          |          |
|----------|----------|----------|----------|----------|
| LDLRAD2  | 1.260152 | 1.047049 | 1.516627 | 0.01443  |
| PMS2CL   | 0.406084 | 0.214081 | 0.770291 | 0.005799 |
| CYHR1    | 1.137959 | 0.760548 | 1.702654 | 0.529606 |
| COL14A1  | 0.847571 | 0.674542 | 1.064983 | 0.155738 |
| CPSF4L   | 0.354593 | 0.15299  | 0.821857 | 0.015632 |
| KLHL17   | 1.086553 | 0.867109 | 1.361533 | 0.470805 |
| PLA2G2C  | 1.367819 | 1.043883 | 1.792279 | 0.023122 |
| ZSCAN23  | 0.635414 | 0.492858 | 0.819202 | 0.000468 |
| RINL     | 1.896258 | 1.372532 | 2.619826 | 0.000104 |
| MORN2    | 0.948338 | 0.654218 | 1.374688 | 0.779459 |
| S100A3   | 1.674877 | 1.13342  | 2.474998 | 0.009638 |
| UBQLN2   | 1.373794 | 0.764435 | 2.468896 | 0.288314 |
| RILPL1   | 0.440904 | 0.2746   | 0.707927 | 0.0007   |
| ZNF490   | 0.944419 | 0.542126 | 1.645239 | 0.839978 |
| CLCN1    | 1.604764 | 1.184416 | 2.174292 | 0.002272 |
| ARL4C    | 1.129102 | 0.908973 | 1.402541 | 0.272467 |
| TREML4   | 1.054376 | 0.859489 | 1.293453 | 0.611591 |
| RAB42    | 0.906077 | 0.594337 | 1.381332 | 0.64664  |
| SCGB1C1  | 0.707142 | 0.370363 | 1.350161 | 0.293655 |
| GPR89B   | 0.965998 | 0.601911 | 1.550317 | 0.88603  |
| EYS      | 1.270003 | 0.484734 | 3.327406 | 0.626697 |
| MAPK12   | 0.906472 | 0.711974 | 1.154103 | 0.425528 |
| COL4A5   | 0.998146 | 0.895615 | 1.112414 | 0.973226 |
| AGRN     | 0.763821 | 0.638068 | 0.914357 | 0.00333  |
| FAM166A  | 0.96507  | 0.653299 | 1.425627 | 0.858249 |
| ZNF626   | 1.005701 | 0.839625 | 1.204626 | 0.950774 |
| HEPACAM  | 0.846288 | 0.600039 | 1.193595 | 0.341467 |
| ZC3H6    | 0.786654 | 0.56033  | 1.104394 | 0.165651 |
| PRKAR1B  | 1.036326 | 0.762434 | 1.408609 | 0.819757 |
| DCUN1D3  | 0.9559   | 0.689089 | 1.326019 | 0.787088 |
| POTEE    | 4.468614 | 0.602129 | 33.1632  | 0.143217 |
| ZNF793   | 1.046423 | 0.863175 | 1.268572 | 0.644096 |
| COMMD6   | 0.981834 | 0.601698 | 1.602128 | 0.941502 |
| IL17REL  | 1.112628 | 0.563618 | 2.19642  | 0.758412 |
| RUFY4    | 1.341994 | 1.076063 | 1.673646 | 0.009039 |
| ZNF383   | 0.729811 | 0.430649 | 1.236794 | 0.241876 |
| HES4     | 1.136034 | 0.933324 | 1.382771 | 0.203422 |
| ZNF669   | 0.699322 | 0.442106 | 1.106186 | 0.126357 |
| CENPP    | 0.965891 | 0.611264 | 1.526256 | 0.881814 |
| PLSCR1   | 1.221235 | 0.889739 | 1.676239 | 0.216113 |
| ZNF559   | 0.645205 | 0.457919 | 0.909089 | 0.012252 |
| SBK1     | 1.013652 | 0.799994 | 1.284372 | 0.910607 |
| SLC38A3  | 0.437084 | 0.195195 | 0.978727 | 0.044194 |
| OR6N2    | 0.299087 | 0.068962 | 1.297132 | 0.106869 |
| GTF2F2   | 0.907774 | 0.520512 | 1.583162 | 0.733122 |
| PRR19    | 1.104259 | 0.772555 | 1.578383 | 0.586352 |
| ZP3      | 1.055944 | 0.745224 | 1.496218 | 0.759499 |
| PDCD1    | 1.254238 | 1.036069 | 1.518348 | 0.020158 |
| CLEC2A   | 1.062462 | 0.869241 | 1.298633 | 0.554109 |
| GPR21    | 1.035135 | 0.80776  | 1.326512 | 0.784944 |
| TCTEX1D4 | 1.080066 | 0.847065 | 1.377157 | 0.534444 |
| SELL     | 0.99754  | 0.855985 | 1.162505 | 0.974836 |
| CHM      | 0.849498 | 0.532436 | 1.355367 | 0.49379  |
| CERKL    | 0.637864 | 0.435943 | 0.933312 | 0.020593 |
| IER5L    | 1.551419 | 1.162159 | 2.071059 | 0.002887 |
| FAM83G   | 1.889699 | 1.4139   | 2.525611 | 1.71E-05 |
| HBA2     | 0.943864 | 0.871978 | 1.021676 | 0.15289  |
| DUSP28   | 1.742181 | 0.953146 | 3.184393 | 0.071228 |

|          |          |          |          |          |
|----------|----------|----------|----------|----------|
| NBR1     | 1.182298 | 0.830921 | 1.682265 | 0.352044 |
| RALGAPAZ | 0.716507 | 0.477148 | 1.07594  | 0.108032 |
| NDOR1    | 1.296508 | 0.903489 | 1.860492 | 0.158778 |
| NKAIN2   | 1.125815 | 0.947313 | 1.337952 | 0.178479 |
| PAQR9    | 0.917491 | 0.64336  | 1.308426 | 0.634422 |
| CLN3     | 0.921758 | 0.576913 | 1.472729 | 0.733273 |
| FAM72B   | 1.155583 | 0.821827 | 1.624882 | 0.405658 |
| SUMO2    | 0.711391 | 0.397875 | 1.271948 | 0.25072  |
| NANOS1   | 0.54376  | 0.348112 | 0.849367 | 0.007418 |
| HMX3     | 1.280394 | 1.010403 | 1.622529 | 0.040794 |
| DPYD     | 1.18842  | 0.999559 | 1.412966 | 0.050587 |
| S100A16  | 1.093577 | 0.974144 | 1.227652 | 0.129516 |
| PTAR1    | 0.997831 | 0.693896 | 1.434894 | 0.990653 |
| CC2D2B   | 0.607424 | 0.412181 | 0.895148 | 0.011741 |
| RHCE     | 0.955606 | 0.811239 | 1.125663 | 0.586844 |
| PARVB    | 2.040732 | 1.415216 | 2.942723 | 0.000134 |
| SLC4A5   | 0.771994 | 0.481976 | 1.236525 | 0.281633 |
| UROS     | 1.222391 | 0.772792 | 1.933559 | 0.390726 |
| ZDHHC9   | 0.743137 | 0.551603 | 1.001178 | 0.050912 |
| QRFP     | 0.669204 | 0.418989 | 1.068844 | 0.092708 |
| TMEM120I | 0.941617 | 0.606232 | 1.462546 | 0.788882 |
| RBM34    | 0.648484 | 0.376521 | 1.116886 | 0.11842  |
| NOXA1    | 1.191454 | 1.000827 | 1.418391 | 0.048924 |
| BCL2L15  | 0.989462 | 0.643247 | 1.522022 | 0.961544 |
| FZD9     | 1.625291 | 0.335321 | 7.877749 | 0.546432 |
| SPRED3   | 1.123305 | 0.71366  | 1.76809  | 0.615394 |
| ZNF548   | 0.644522 | 0.446464 | 0.930442 | 0.019036 |
| MTF1     | 1.193225 | 0.803139 | 1.772776 | 0.381788 |
| TMCO2    | 1.264754 | 0.667323 | 2.397044 | 0.471513 |
| TMEM201  | 1.237772 | 0.872646 | 1.755671 | 0.231655 |
| NHLRC3   | 0.534724 | 0.359419 | 0.795532 | 0.002012 |
| HMX2     | 1.72406  | 1.198708 | 2.479655 | 0.00331  |
| ZDHHC11  | 1.732993 | 1.220865 | 2.459948 | 0.002094 |
| CNR2     | 1.163503 | 0.897882 | 1.507703 | 0.252084 |
| ENTPD8   | 1.233847 | 0.857055 | 1.77629  | 0.258361 |
| RPL14    | 1.069825 | 0.695911 | 1.644642 | 0.758368 |
| BEND4    | 1.106924 | 0.97871  | 1.251935 | 0.105805 |
| ZNF563   | 0.983376 | 0.697366 | 1.386686 | 0.923836 |
| TMC3     | 0.80332  | 0.362106 | 1.78214  | 0.590102 |
| FBF1     | 1.035798 | 0.642896 | 1.66882  | 0.885077 |
| KLRG2    | 0.885871 | 0.685478 | 1.144847 | 0.354367 |
| ASTL     | 1.328676 | 0.968947 | 1.821957 | 0.077709 |
| MSL1     | 0.712698 | 0.404167 | 1.256752 | 0.241875 |
| LRRK2    | 1.035079 | 0.917327 | 1.167947 | 0.57579  |
| TRMT2B   | 0.791039 | 0.402725 | 1.553774 | 0.496161 |
| FAM120AC | 2.763517 | 1.459279 | 5.233424 | 0.001809 |
| NOC2L    | 1.282179 | 0.837363 | 1.963286 | 0.252858 |
| ZNF292   | 0.640494 | 0.445126 | 0.921611 | 0.01641  |
| HUS1B    | 1.314969 | 0.737445 | 2.344774 | 0.35347  |
| KCTD21   | 1.279279 | 0.83962  | 1.949162 | 0.251649 |
| ADAT2    | 1.008843 | 0.704306 | 1.445059 | 0.961701 |
| KIR2DL4  | 1.715314 | 1.341284 | 2.193647 | 1.71E-05 |
| ZNF567   | 0.752561 | 0.505275 | 1.120869 | 0.161937 |
| NDUFA4   | 1.323399 | 0.788642 | 2.220761 | 0.28872  |
| ALKBH2   | 1.195297 | 0.765843 | 1.865572 | 0.432207 |
| RNFT1    | 0.812805 | 0.538658 | 1.226476 | 0.323441 |
| RELN     | 1.263667 | 0.84176  | 1.897043 | 0.258921 |
| FAM111B  | 1.008371 | 0.844386 | 1.204204 | 0.92665  |

|           |          |          |          |          |
|-----------|----------|----------|----------|----------|
| LITAF     | 1.118083 | 0.820995 | 1.522677 | 0.478755 |
| VSTM1     | 0.91844  | 0.839824 | 1.004415 | 0.062394 |
| TMEM120   | 1.191479 | 0.886288 | 1.601761 | 0.245879 |
| ARID2     | 0.773249 | 0.498986 | 1.198257 | 0.249874 |
| SF3B3     | 1.300885 | 0.79662  | 2.124354 | 0.293142 |
| BLOC1S3   | 2.114881 | 1.226239 | 3.647514 | 0.007073 |
| SP6       | 1.854512 | 0.632663 | 5.436089 | 0.260334 |
| PLAC9     | 0.92546  | 0.64673  | 1.324317 | 0.671804 |
| ZNF573    | 0.66767  | 0.481082 | 0.926627 | 0.015707 |
| ZNF527    | 0.737607 | 0.449526 | 1.210305 | 0.228385 |
| S100A13   | 1.528977 | 0.970491 | 2.408853 | 0.067129 |
| ZNF33A    | 0.73507  | 0.529528 | 1.020395 | 0.065869 |
| ZNF600    | 1.104866 | 0.772516 | 1.580199 | 0.584909 |
| BTBD8     | 0.791165 | 0.52747  | 1.186688 | 0.257438 |
| MAOA      | 1.219943 | 0.980044 | 1.518566 | 0.075154 |
| TSPYL1    | 1.151118 | 0.659734 | 2.008493 | 0.620233 |
| PNRC2     | 1.725332 | 1.058133 | 2.81323  | 0.02878  |
| FHIT      | 1.048577 | 0.763639 | 1.439835 | 0.769376 |
| ZKSCAN3   | 0.64985  | 0.475897 | 0.887387 | 0.006696 |
| RRP7A     | 1.745033 | 1.064114 | 2.861668 | 0.02737  |
| LIN54     | 1.061826 | 0.648732 | 1.737968 | 0.811393 |
| FAM53B    | 1.811535 | 1.233166 | 2.661167 | 0.002461 |
| ALG1L     | 0.551618 | 0.308487 | 0.98637  | 0.04483  |
| GSPT2     | 1.307046 | 1.028863 | 1.660444 | 0.028308 |
| CXCL17    | 0.992169 | 0.73381  | 1.34149  | 0.959257 |
| HMGB1     | 0.904301 | 0.583848 | 1.400641 | 0.652261 |
| SH2D5     | 0.709724 | 0.310505 | 1.622223 | 0.416258 |
| ZFP92     | 1.029519 | 0.802721 | 1.320396 | 0.81876  |
| NCR1      | 1.082052 | 0.88228  | 1.327059 | 0.448892 |
| BLOC1S2   | 2.27927  | 1.411777 | 3.679812 | 0.000749 |
| SYCP2     | 0.968359 | 0.809775 | 1.157999 | 0.724568 |
| IL1RAP    | 1.234339 | 0.979931 | 1.554797 | 0.073807 |
| PAX5      | 0.973559 | 0.831398 | 1.140027 | 0.739337 |
| ZNF699    | 0.987363 | 0.609991 | 1.598199 | 0.958723 |
| TDRD7     | 1.174548 | 0.904597 | 1.525056 | 0.227257 |
| KIAA0895L | 1.151295 | 0.840978 | 1.576118 | 0.379297 |
| HLA-DRB1  | 1.279579 | 1.108729 | 1.476756 | 0.000748 |
| MYT1      | 1.000155 | 0.740969 | 1.350002 | 0.999191 |
| AKR1C3    | 1.156825 | 0.961027 | 1.392514 | 0.123611 |
| SPATS2L   | 1.64777  | 1.296309 | 2.094521 | 4.50E-05 |
| ZNF250    | 0.690238 | 0.44388  | 1.073328 | 0.099803 |
| WDSUB1    | 0.490917 | 0.281337 | 0.856623 | 0.012252 |
| ZNF79     | 1.031572 | 0.632673 | 1.681974 | 0.900828 |
| S100A4    | 1.456434 | 1.213383 | 1.748171 | 5.43E-05 |
| PLEKHG4   | 1.079847 | 0.897881 | 1.29869  | 0.414558 |
| FAT4      | 0.898071 | 0.52472  | 1.53707  | 0.694984 |
| ZNF681    | 0.817366 | 0.633847 | 1.05402  | 0.120079 |
| ACADSB    | 0.795011 | 0.561283 | 1.126067 | 0.196526 |
| STK40     | 1.377556 | 0.911676 | 2.081508 | 0.128286 |
| TMEM63A   | 1.096986 | 0.791927 | 1.519558 | 0.57768  |
| CTSE      | 0.771944 | 0.610968 | 0.975334 | 0.030062 |
| SEMA4A    | 1.137649 | 0.935727 | 1.383143 | 0.195802 |
| MPHOSPI-  | 1.159494 | 0.695394 | 1.933332 | 0.570504 |
| GREB1     | 0.597842 | 0.348192 | 1.026488 | 0.062157 |
| SIRPB2    | 0.949387 | 0.825589 | 1.091748 | 0.466251 |
| ZNF766    | 0.753401 | 0.496067 | 1.144227 | 0.184159 |
| RYR1      | 1.653122 | 1.284888 | 2.126887 | 9.24E-05 |
| SRGAP3    | 0.791423 | 0.64228  | 0.975198 | 0.028113 |

|          |          |          |          |          |
|----------|----------|----------|----------|----------|
| TUBB     | 1.245269 | 0.840999 | 1.843874 | 0.273387 |
| LCOR     | 1.287306 | 0.81823  | 2.025293 | 0.2747   |
| SUPT5H   | 1.589283 | 0.969973 | 2.604011 | 0.065923 |
| XPNPEP3  | 0.866587 | 0.487663 | 1.539942 | 0.625447 |
| ZNF107   | 0.679429 | 0.52467  | 0.879837 | 0.003382 |
| PPIA     | 1.271728 | 0.715602 | 2.260045 | 0.412589 |
| ZNF471   | 0.913941 | 0.708567 | 1.178841 | 0.488327 |
| ZNF836   | 0.929075 | 0.652573 | 1.322734 | 0.683162 |
| ZNF493   | 0.62972  | 0.467942 | 0.847428 | 0.002268 |
| GTF2IRD2 | 1.197837 | 0.677301 | 2.118425 | 0.5349   |
| SUPT3H   | 0.843994 | 0.577578 | 1.233297 | 0.380798 |
| NIF3L1   | 1.353103 | 0.708972 | 2.582453 | 0.359142 |
| ATP2A1   | 1.255921 | 0.863663 | 1.826334 | 0.232967 |
| POM121   | 0.683866 | 0.418181 | 1.118348 | 0.129964 |
| ZBTB44   | 0.721093 | 0.47131  | 1.103255 | 0.131794 |
| GIMAP5   | 1.033287 | 0.773566 | 1.380208 | 0.824549 |
| NLGN3    | 0.919376 | 0.622983 | 1.356781 | 0.672044 |
| CD55     | 0.910413 | 0.660878 | 1.254169 | 0.565785 |
| ZNF565   | 0.648275 | 0.37788  | 1.112153 | 0.115496 |
| NTNG2    | 0.825806 | 0.737857 | 0.924238 | 0.000865 |
| WDR5     | 1.634504 | 0.847517 | 3.152272 | 0.142581 |
| LONP1    | 1.235755 | 0.817433 | 1.868155 | 0.315416 |
| TRRAP    | 0.749884 | 0.531249 | 1.058497 | 0.101693 |
| NUDT11   | 0.970313 | 0.752958 | 1.250412 | 0.815837 |
| FUT4     | 0.917241 | 0.728323 | 1.155162 | 0.462863 |
| ASB13    | 1.63017  | 1.134778 | 2.341828 | 0.008192 |
| ZNF34    | 1.41596  | 0.792754 | 2.529085 | 0.239904 |
| ZNF140   | 0.803591 | 0.510937 | 1.263872 | 0.343942 |
| INCA1    | 0.892656 | 0.609516 | 1.307324 | 0.559671 |
| PTPN1    | 2.23303  | 1.420169 | 3.511147 | 0.000503 |
| EVL      | 1.132593 | 0.89927  | 1.426454 | 0.290108 |
| THEM5    | 0.991341 | 0.737958 | 1.331726 | 0.953951 |
| EPHB4    | 0.835036 | 0.673385 | 1.035494 | 0.10054  |
| PRTN3    | 0.979682 | 0.909508 | 1.05527  | 0.588284 |
| ZNF765   | 0.735758 | 0.49467  | 1.094346 | 0.129803 |
| ZNF124   | 0.514223 | 0.378765 | 0.698125 | 2.01E-05 |
| XRCC6    | 1.853896 | 1.085987 | 3.1648   | 0.02368  |
| S100A5   | 1.966191 | 1.262229 | 3.062761 | 0.002792 |
| TSC22D2  | 1.399166 | 0.773152 | 2.532057 | 0.267069 |
| ASMT     | 1.268018 | 0.37748  | 4.259483 | 0.700909 |
| ZNF569   | 0.827741 | 0.544785 | 1.257663 | 0.375723 |
| ARMCX4   | 0.836318 | 0.562591 | 1.243227 | 0.376876 |
| YRDC     | 0.952129 | 0.64331  | 1.409195 | 0.806283 |
| ZNF777   | 1.458377 | 0.920761 | 2.309898 | 0.107808 |
| PIK3R4   | 1.057875 | 0.629569 | 1.777564 | 0.831734 |
| ZNF775   | 0.98921  | 0.67568  | 1.448225 | 0.955518 |
| ZNF605   | 0.823999 | 0.539961 | 1.257452 | 0.369362 |
| TRAPPC2  | 1.06617  | 0.570205 | 1.993529 | 0.840963 |
| MYL6B    | 1.395865 | 0.857346 | 2.27264  | 0.179897 |
| ZNF799   | 0.645302 | 0.39182  | 1.06277  | 0.085286 |
| SIAH1    | 0.442167 | 0.265931 | 0.735196 | 0.001657 |
| IPO4     | 0.713872 | 0.375391 | 1.357553 | 0.30404  |
| NCOR2    | 1.656543 | 1.167529 | 2.350378 | 0.004688 |
| SULT1A1  | 1.005818 | 0.743824 | 1.360093 | 0.969943 |
| ARL9     | 1.161316 | 0.880004 | 1.532554 | 0.290632 |
| PRPF40A  | 0.850376 | 0.504146 | 1.434387 | 0.543451 |
| GDAP2    | 0.985994 | 0.64251  | 1.513104 | 0.948531 |
| TCEAL3   | 0.905692 | 0.639897 | 1.281891 | 0.576251 |

|          |          |          |          |          |
|----------|----------|----------|----------|----------|
| ANAPC7   | 0.707014 | 0.375746 | 1.330334 | 0.282386 |
| TPK1     | 1.068294 | 0.79153  | 1.441829 | 0.665874 |
| SLC6A9   | 0.98804  | 0.812435 | 1.201602 | 0.904078 |
| AFAP1    | 0.669086 | 0.365801 | 1.223823 | 0.192114 |
| NACA     | 0.811943 | 0.539747 | 1.221408 | 0.317333 |
| MYO18A   | 1.014247 | 0.762432 | 1.349231 | 0.922604 |
| MAN2A2   | 0.992283 | 0.734877 | 1.339851 | 0.959676 |
| MME      | 1.078156 | 0.8944   | 1.299666 | 0.429913 |
| FAM72A   | 1.143807 | 0.752856 | 1.737775 | 0.528926 |
| CACNA1H  | 0.89795  | 0.720721 | 1.11876  | 0.337274 |
| SULF2    | 1.087048 | 0.95466  | 1.237795 | 0.207785 |
| HBG2     | 0.855401 | 0.718405 | 1.018521 | 0.079449 |
| PLXNB2   | 1.388725 | 1.108839 | 1.739258 | 0.004241 |
| XRCC2    | 0.99863  | 0.737198 | 1.352775 | 0.992939 |
| MYO6     | 1.274058 | 0.769971 | 2.108164 | 0.34587  |
| HDAC2    | 0.821741 | 0.514667 | 1.312029 | 0.410855 |
| ZNF782   | 0.718636 | 0.484746 | 1.065377 | 0.100029 |
| ZNF846   | 0.776528 | 0.548572 | 1.099209 | 0.153731 |
| MMP1     | 1.23367  | 0.436878 | 3.483673 | 0.691754 |
| TCF4     | 1.190582 | 1.011982 | 1.400702 | 0.035414 |
| ZNF136   | 0.639735 | 0.404792 | 1.011038 | 0.055754 |
| ZKSCAN5  | 0.898912 | 0.499314 | 1.618305 | 0.722396 |
| ZNF502   | 1.094885 | 0.880641 | 1.361249 | 0.414549 |
| TRAPPC4  | 2.055571 | 1.094966 | 3.858905 | 0.024943 |
| TTC30B   | 1.025903 | 0.666704 | 1.578628 | 0.907415 |
| TECPR2   | 0.879378 | 0.599215 | 1.290531 | 0.511325 |
| TLR7     | 1.149369 | 1.018857 | 1.296599 | 0.02359  |
| ZFP62    | 0.850594 | 0.595071 | 1.215838 | 0.37466  |
| ERI2     | 0.958363 | 0.680218 | 1.350241 | 0.807888 |
| TOMM7    | 1.01826  | 0.625551 | 1.657505 | 0.94197  |
| HSH2D    | 0.975624 | 0.804481 | 1.183175 | 0.80199  |
| TRPV1    | 0.871731 | 0.542903 | 1.399726 | 0.569926 |
| ZNF33B   | 0.954555 | 0.657478 | 1.385864 | 0.806844 |
| ZNF512B  | 1.072185 | 0.810233 | 1.418826 | 0.625798 |
| AMZ2     | 0.985891 | 0.594526 | 1.634885 | 0.956088 |
| ZNF431   | 0.66122  | 0.464677 | 0.940894 | 0.021534 |
| NF1      | 0.677211 | 0.474546 | 0.966429 | 0.031701 |
| VKORC1L1 | 0.74846  | 0.509154 | 1.100243 | 0.140489 |
| ZNF418   | 1.176595 | 0.982503 | 1.409029 | 0.077052 |
| DAPK1    | 1.156502 | 0.970612 | 1.377995 | 0.103881 |
| HLA-DQA  | 1.124834 | 0.990065 | 1.277948 | 0.07082  |
| COL27A1  | 0.757058 | 0.553223 | 1.035996 | 0.082034 |
| GM2A     | 1.342442 | 0.986413 | 1.826972 | 0.061074 |
| S100A2   | 2.481914 | 1.083898 | 5.683095 | 0.031511 |
| ZNF700   | 0.630962 | 0.451146 | 0.882448 | 0.007132 |
| CD47     | 0.747917 | 0.520724 | 1.074235 | 0.115874 |
| TLE1     | 0.842226 | 0.703375 | 1.008487 | 0.061759 |
| MAML3    | 1.029664 | 0.694662 | 1.526223 | 0.884252 |
| STRN3    | 0.549346 | 0.314496 | 0.959568 | 0.035292 |
| ZNF239   | 1.201854 | 0.942274 | 1.532943 | 0.138599 |
| CHRNA3   | 1.659221 | 0.829331 | 3.31956  | 0.15241  |
| ZSCAN16  | 0.955328 | 0.631024 | 1.446304 | 0.829001 |
| ADA      | 0.97912  | 0.790205 | 1.213199 | 0.84701  |
| ARID5A   | 0.997057 | 0.747564 | 1.329817 | 0.983998 |
| PPTC7    | 0.861441 | 0.554708 | 1.337786 | 0.506607 |
| TOMM20L  | 0.692062 | 0.434345 | 1.102696 | 0.121464 |
| RGPD4    | 0.622236 | 0.19816  | 1.953866 | 0.416416 |
| NHLRC2   | 0.930889 | 0.644006 | 1.34557  | 0.703224 |

|          |          |          |          |          |
|----------|----------|----------|----------|----------|
| ZFP28    | 0.900079 | 0.609792 | 1.328556 | 0.59617  |
| CBWD3    | 0.314051 | 0.120862 | 0.816037 | 0.017443 |
| SCN8A    | 1.014946 | 0.766478 | 1.343961 | 0.917521 |
| LAMB3    | 1.054091 | 0.747522 | 1.486388 | 0.763851 |
| KPNA5    | 0.717868 | 0.47832  | 1.077386 | 0.109568 |
| ANKRD36  | 0.850501 | 0.622205 | 1.16256  | 0.309901 |
| ARHGEF12 | 1.037484 | 0.851258 | 1.264451 | 0.715437 |
| PDLIM7   | 1.503557 | 1.176934 | 1.920823 | 0.0011   |
| FLNA     | 1.451876 | 1.117916 | 1.885602 | 0.005178 |
| RPS26P11 | 0.975644 | 0.683376 | 1.392908 | 0.892031 |
| SRGAP1   | 1.306825 | 1.051745 | 1.62377  | 0.015721 |
| FAM3C    | 0.72056  | 0.42759  | 1.214263 | 0.218382 |
| SLC39A10 | 0.871463 | 0.614743 | 1.23539  | 0.439688 |
| CASP4    | 1.097674 | 0.748669 | 1.609373 | 0.633119 |
| AP2A1    | 1.483634 | 1.020478 | 2.156998 | 0.038816 |
| ZNF585A  | 0.828295 | 0.533775 | 1.285321 | 0.400731 |
| FUT11    | 1.252742 | 0.6634   | 2.365636 | 0.487224 |
| ANXA4    | 1.598952 | 1.122674 | 2.277285 | 0.009288 |
| LAGE3    | 1.617484 | 1.126883 | 2.321674 | 0.009113 |
| WDR5B    | 0.898447 | 0.605485 | 1.333157 | 0.594829 |
| WDR45    | 1.415525 | 0.845014 | 2.371215 | 0.186772 |
| METTL9   | 1.266983 | 0.916988 | 1.750564 | 0.151404 |
| ZNF138   | 0.650984 | 0.477792 | 0.886957 | 0.006527 |
| ZNF429   | 0.748654 | 0.575109 | 0.974567 | 0.031443 |
| ZNF470   | 1.108924 | 0.724923 | 1.696334 | 0.633567 |
| SERTAD1  | 1.675557 | 1.176241 | 2.386833 | 0.004248 |
| ZNF100   | 0.650782 | 0.442606 | 0.956872 | 0.028954 |
| ZNF398   | 0.670665 | 0.40235  | 1.117912 | 0.125424 |
| ANXA6    | 1.178519 | 0.927511 | 1.497456 | 0.178893 |
| ZNF441   | 0.788006 | 0.563936 | 1.101108 | 0.162799 |
| GMFB     | 1.157519 | 0.728884 | 1.838221 | 0.535345 |
| SIGLEC15 | 0.823707 | 0.639764 | 1.060537 | 0.13255  |
| ZNF420   | 0.869866 | 0.577157 | 1.311024 | 0.505347 |
| ZNF763   | 0.566473 | 0.363482 | 0.882828 | 0.012057 |
| ZMYM1    | 0.76373  | 0.54672  | 1.066877 | 0.114016 |
| MAFG     | 1.664494 | 1.063088 | 2.606124 | 0.02592  |
| ARRDC1   | 1.102935 | 0.782469 | 1.554649 | 0.575892 |
| KIAA1671 | 1.36245  | 0.835217 | 2.222499 | 0.215433 |
| IGF2R    | 1.219338 | 1.045802 | 1.42167  | 0.011351 |
| GAL3ST4  | 0.689847 | 0.517182 | 0.920157 | 0.011533 |
| DYNC1H1  | 0.946316 | 0.665168 | 1.346296 | 0.759015 |
| PCBP2    | 0.756825 | 0.3819   | 1.499828 | 0.424633 |
| ZGPAT    | 1.174681 | 0.804266 | 1.715694 | 0.404861 |
| SLC25A29 | 0.724449 | 0.581812 | 0.902054 | 0.003959 |
| PGAP1    | 0.935172 | 0.711949 | 1.228383 | 0.630032 |
| SRC      | 1.352021 | 1.128821 | 1.619354 | 0.001052 |
| ZNF682   | 0.853512 | 0.631281 | 1.153974 | 0.30333  |
| ZNF772   | 0.953803 | 0.732195 | 1.242484 | 0.725889 |
| ZNF257   | 0.915197 | 0.748281 | 1.119347 | 0.388387 |
| ADAM32   | 1.125347 | 0.697612 | 1.815344 | 0.628365 |
| ACSL5    | 1.760377 | 1.136266 | 2.727291 | 0.011345 |
| LRR8B    | 1.114192 | 0.816197 | 1.520986 | 0.495905 |
| ABC8     | 1.220583 | 0.823001 | 1.810234 | 0.321565 |
| SND1     | 1.041901 | 0.656314 | 1.654021 | 0.861808 |
| ZNF785   | 0.736904 | 0.458957 | 1.183179 | 0.206332 |
| SULT1A2  | 0.936297 | 0.616143 | 1.422806 | 0.757853 |
| NEK5     | 0.617847 | 0.410657 | 0.929572 | 0.020867 |
| PSMD12   | 0.991568 | 0.590726 | 1.664406 | 0.974437 |



|          |          |          |          |          |
|----------|----------|----------|----------|----------|
| PIWIL2   | 0.816658 | 0.484257 | 1.377222 | 0.447503 |
| SLC22A4  | 0.82638  | 0.665273 | 1.026502 | 0.084788 |
| ENTPD4   | 0.878888 | 0.62166  | 1.242551 | 0.464942 |
| C1D      | 0.963674 | 0.571048 | 1.626252 | 0.889772 |
| TBC1D9B  | 1.404612 | 0.919429 | 2.145825 | 0.11608  |
| SERPINA1 | 1.043687 | 0.949657 | 1.147026 | 0.374726 |
| TPSB2    | 0.915534 | 0.824168 | 1.017027 | 0.099929 |
| KANK2    | 1.187379 | 0.961456 | 1.466388 | 0.110725 |
| GTF2E2   | 1.358742 | 0.712808 | 2.59001  | 0.351649 |
| IL27     | 1.191803 | 0.857572 | 1.656298 | 0.296049 |
| GUCA2A   | 1.406965 | 0.490749 | 4.033735 | 0.525193 |
| ZNF165   | 0.829936 | 0.563859 | 1.221572 | 0.344573 |
| SYNGAP1  | 1.280187 | 0.974341 | 1.682036 | 0.076171 |
| FITM2    | 0.765294 | 0.451966 | 1.295841 | 0.319497 |
| BLM      | 1.009945 | 0.685513 | 1.487922 | 0.960077 |
| ZNF720   | 0.70604  | 0.482801 | 1.0325   | 0.072649 |
| DDI2     | 1.125214 | 0.77896  | 1.625379 | 0.529533 |
| SVIL     | 0.793313 | 0.574864 | 1.094772 | 0.158845 |
| TRIM33   | 0.667709 | 0.376135 | 1.185304 | 0.167775 |
| LRP10    | 1.471897 | 1.104756 | 1.961048 | 0.008279 |
| PELI1    | 1.194487 | 0.99132  | 1.439291 | 0.061718 |
| ZNF655   | 0.618117 | 0.417398 | 0.915358 | 0.016331 |
| MRPL21   | 2.0448   | 1.088965 | 3.839618 | 0.026076 |
| LYPD2    | 1.235166 | 0.955746 | 1.596278 | 0.106515 |
| UAP1L1   | 1.168939 | 0.890555 | 1.534344 | 0.260689 |
| FBXL22   | 1.054001 | 0.596925 | 1.861068 | 0.85613  |
| ZNF786   | 0.883078 | 0.623689 | 1.250346 | 0.483439 |
| ZNF517   | 0.83302  | 0.57173  | 1.213725 | 0.341427 |
| ZNF675   | 0.720778 | 0.473895 | 1.096281 | 0.125935 |
| SLC22A5  | 1.242979 | 0.962682 | 1.604886 | 0.095263 |
| DACT3    | 1.16782  | 0.603798 | 2.258706 | 0.644836 |
| ADARB1   | 1.167438 | 0.887283 | 1.536051 | 0.268829 |
| HTT      | 1.257604 | 0.818333 | 1.93267  | 0.295798 |
| OR6N1    | 0.156751 | 0.025999 | 0.945059 | 0.043217 |
| C5AR1    | 1.108376 | 1.008176 | 1.218534 | 0.033304 |
| VEPH1    | 1.306945 | 0.770993 | 2.215464 | 0.320162 |
| SHPK     | 1.066959 | 0.506368 | 2.24817  | 0.864663 |
| IPP      | 1.023857 | 0.651863 | 1.608133 | 0.918482 |
| MAP3K5   | 1.310766 | 0.938924 | 1.829869 | 0.111893 |
| CYP2F1   | 0.716689 | 0.279739 | 1.836151 | 0.487693 |
| GSTK1    | 1.263244 | 0.856322 | 1.863536 | 0.238783 |
| HNRNPAB  | 2.270223 | 1.277402 | 4.034683 | 0.005199 |
| STMN3    | 1.029525 | 0.823853 | 1.286543 | 0.798026 |
| PDGFA    | 0.936563 | 0.70397  | 1.246003 | 0.652741 |
| GYPE     | 1.010672 | 0.859845 | 1.187955 | 0.89757  |
| SPN      | 0.774763 | 0.542959 | 1.105529 | 0.159461 |
| ZNF695   | 1.112862 | 0.821146 | 1.508211 | 0.490535 |
| ZNF628   | 1.130055 | 0.851468 | 1.499791 | 0.397219 |
| SLC2A10  | 1.157904 | 0.917227 | 1.461734 | 0.217496 |
| ZNF665   | 0.815609 | 0.540966 | 1.229687 | 0.33057  |
| RPF2     | 1.061029 | 0.688755 | 1.634518 | 0.788164 |
| SLC28A3  | 0.80011  | 0.684527 | 0.935211 | 0.005088 |
| FAM177B  | 1.154786 | 0.891627 | 1.495616 | 0.275425 |
| MIB2     | 1.05619  | 0.789173 | 1.413551 | 0.713134 |
| MYO5A    | 1.045251 | 0.793266 | 1.377281 | 0.753178 |
| GZMM     | 1.111141 | 0.882251 | 1.399413 | 0.370533 |
| ATG7     | 0.953082 | 0.690294 | 1.315909 | 0.770307 |
| SIPA1L1  | 0.835425 | 0.642849 | 1.085689 | 0.178625 |

|          |          |          |          |          |
|----------|----------|----------|----------|----------|
| TTC30A   | 0.77509  | 0.480395 | 1.250563 | 0.296549 |
| ELANE    | 0.920175 | 0.86509  | 0.978767 | 0.008256 |
| RAB40C   | 0.932085 | 0.677719 | 1.281923 | 0.665351 |
| PIGN     | 0.53771  | 0.348431 | 0.829812 | 0.005068 |
| ZNF624   | 0.762869 | 0.502776 | 1.157512 | 0.203244 |
| HHLA3    | 1.376418 | 0.956731 | 1.980209 | 0.085141 |
| HOXA4    | 1.205691 | 1.036491 | 1.402512 | 0.015329 |
| TOPORS   | 0.932658 | 0.606365 | 1.434533 | 0.750969 |
| BCO2     | 0.963121 | 0.642034 | 1.444786 | 0.855892 |
| ENTPD6   | 1.258812 | 0.813627 | 1.947585 | 0.301284 |
| KLKP1    | 1.239054 | 0.515586 | 2.977686 | 0.631835 |
| FAR1     | 1.103759 | 0.782445 | 1.557022 | 0.573854 |
| ZNF841   | 0.917893 | 0.750608 | 1.122461 | 0.403946 |
| VN1R5    | 1.189643 | 0.693299 | 2.041328 | 0.528467 |
| ZNF615   | 0.88838  | 0.610145 | 1.293494 | 0.536946 |
| CDC42SE1 | 1.418207 | 1.015029 | 1.98153  | 0.040621 |
| MPEG1    | 1.103976 | 1.016695 | 1.198751 | 0.018574 |
| SERPINB2 | 1.099172 | 0.980153 | 1.232642 | 0.10585  |
| DPP4     | 1.390801 | 1.012322 | 1.910783 | 0.041797 |
| PDCD1LG2 | 1.411749 | 1.038507 | 1.919135 | 0.027725 |
| ZNF433   | 0.698367 | 0.495863 | 0.983571 | 0.039901 |
| DNAH10   | 0.989857 | 0.646018 | 1.516702 | 0.962653 |
| SPTAN1   | 1.041193 | 0.723618 | 1.498143 | 0.827865 |
| NMB      | 1.013604 | 0.714866 | 1.437182 | 0.939542 |
| KLHL14   | 1.266614 | 0.819678 | 1.957246 | 0.287133 |
| FAM114A1 | 0.847211 | 0.668224 | 1.07414  | 0.170901 |
| RPE      | 0.932828 | 0.590913 | 1.472581 | 0.765313 |
| ZNF460   | 0.734642 | 0.568122 | 0.949971 | 0.018708 |
| CR1L     | 0.862089 | 0.666424 | 1.115202 | 0.258551 |
| PHF2     | 1.013958 | 0.635988 | 1.616555 | 0.953553 |
| RPS26    | 1.018128 | 0.785023 | 1.32045  | 0.892277 |
| PSAP     | 1.150786 | 0.946658 | 1.39893  | 0.158618 |
| S100A10  | 1.046388 | 0.931039 | 1.176028 | 0.446709 |
| LHFPL5   | 0.685817 | 0.444166 | 1.058941 | 0.088834 |
| RPL37A   | 1.031926 | 0.682224 | 1.56088  | 0.881677 |
| CFD      | 0.92907  | 0.848952 | 1.01675  | 0.109831 |
| EME2     | 1.317475 | 0.907024 | 1.913666 | 0.147728 |
| KLHDC1   | 0.77267  | 0.535548 | 1.114781 | 0.1679   |
| ZNF81    | 0.828289 | 0.53777  | 1.275757 | 0.392627 |
| TAF13    | 0.797743 | 0.511056 | 1.245253 | 0.319944 |
| ZNF780A  | 0.900187 | 0.633563 | 1.279015 | 0.557365 |
| ATAD3A   | 1.419865 | 1.00712  | 2.001765 | 0.045452 |
| FAM118B  | 1.141634 | 0.731957 | 1.780608 | 0.559169 |
| ZNF461   | 0.688107 | 0.461083 | 1.02691  | 0.067255 |
| SLC9A8   | 1.388812 | 0.874067 | 2.206696 | 0.164456 |
| OCLN     | 1.172354 | 1.002319 | 1.371234 | 0.046708 |
| ZNF181   | 0.817283 | 0.562196 | 1.188112 | 0.290511 |
| ZNF44    | 0.648165 | 0.398248 | 1.054915 | 0.081013 |
| GPAA1    | 1.395971 | 0.985111 | 1.978189 | 0.060707 |
| ADAMTSL1 | 1.201141 | 0.820733 | 1.757866 | 0.345567 |
| SGTB     | 1.263888 | 0.929272 | 1.718993 | 0.135571 |
| ZNF790   | 0.756293 | 0.555202 | 1.030218 | 0.076529 |
| PRB3     | 0.819729 | 0.6058   | 1.109205 | 0.197653 |
| MYO1C    | 1.037671 | 0.842385 | 1.278231 | 0.728126 |
| NKIRAS1  | 0.502537 | 0.312564 | 0.807975 | 0.004511 |
| SLC22A12 | 1.017354 | 0.769036 | 1.345854 | 0.904077 |
| KIF13B   | 1.247303 | 0.898752 | 1.731027 | 0.186313 |
| ADH5     | 0.850944 | 0.521558 | 1.388352 | 0.518119 |

|          |          |          |          |          |
|----------|----------|----------|----------|----------|
| TEAD4    | 0.90621  | 0.728385 | 1.127448 | 0.376883 |
| SPG7     | 0.879058 | 0.574348 | 1.345427 | 0.552775 |
| ZNF677   | 1.01666  | 0.791122 | 1.306497 | 0.897269 |
| ZNF823   | 0.979749 | 0.695571 | 1.38003  | 0.906818 |
| ZNF311   | 1.143213 | 0.851337 | 1.535157 | 0.37353  |
| ZNF347   | 0.796318 | 0.595048 | 1.065666 | 0.125492 |
| PLCG2    | 1.005791 | 0.688136 | 1.470082 | 0.97621  |
| FCHSD1   | 1.227521 | 0.930917 | 1.618628 | 0.146312 |
| ZNF71    | 0.923182 | 0.597314 | 1.426827 | 0.718983 |
| S100A6   | 1.297789 | 1.103762 | 1.525924 | 0.001606 |
| RPL12    | 1.357017 | 0.889416 | 2.070455 | 0.156689 |
| DNM3     | 1.045735 | 0.823414 | 1.328084 | 0.713835 |
| ZNF121   | 0.930569 | 0.618046 | 1.401124 | 0.730367 |
| MPZL1    | 0.842023 | 0.656051 | 1.080712 | 0.176893 |
| VPS13A   | 0.827144 | 0.66878  | 1.023006 | 0.080085 |
| MBP      | 1.204531 | 0.787239 | 1.843015 | 0.391138 |
| ELOVL2   | 0.852191 | 0.596714 | 1.217047 | 0.379044 |
| LEKR1    | 1.54758  | 0.821829 | 2.914237 | 0.176275 |
| SNHG12   | 1.758226 | 1.109385 | 2.786552 | 0.016316 |
| CLEC9A   | 1.205549 | 1.053725 | 1.379249 | 0.00649  |
| KEL      | 0.976701 | 0.853209 | 1.118067 | 0.732491 |
| NOL8     | 0.904223 | 0.609413 | 1.34165  | 0.617007 |
| IRAK4    | 1.01099  | 0.609213 | 1.67774  | 0.966265 |
| MRPL42   | 0.953821 | 0.622365 | 1.461801 | 0.828175 |
| ENTPD7   | 1.057456 | 0.750827 | 1.489308 | 0.749164 |
| FCGR1B   | 1.098596 | 0.894349 | 1.349488 | 0.370249 |
| ZNF335   | 1.269159 | 0.883987 | 1.822161 | 0.196461 |
| RPS4X    | 1.158615 | 0.810006 | 1.657258 | 0.42015  |
| ZNF273   | 0.72433  | 0.540864 | 0.970032 | 0.030454 |
| ZNF84    | 0.796029 | 0.589871 | 1.074238 | 0.13578  |
| MAK16    | 0.916178 | 0.570145 | 1.472226 | 0.71754  |
| ZNF667   | 1.007187 | 0.839848 | 1.207869 | 0.938421 |
| AVPR1B   | 0.666989 | 0.522928 | 0.850738 | 0.001106 |
| SIRPA    | 1.17794  | 0.948409 | 1.46302  | 0.138617 |
| GRK6     | 1.947215 | 1.385844 | 2.735985 | 0.000123 |
| PRIM1    | 1.00428  | 0.717624 | 1.405441 | 0.980131 |
| SULT1C4  | 0.938326 | 0.810276 | 1.086612 | 0.395122 |
| CD2AP    | 1.177477 | 0.864116 | 1.604473 | 0.300736 |
| NUP62CL  | 1.201261 | 0.908728 | 1.587965 | 0.197813 |
| SFI1     | 1.105    | 0.738618 | 1.653122 | 0.627103 |
| ZNF649   | 0.770011 | 0.553163 | 1.071868 | 0.121454 |
| ZNF248   | 0.705902 | 0.500359 | 0.99588  | 0.047315 |
| LPAR1    | 1.055765 | 0.894671 | 1.245866 | 0.520615 |
| HIBCH    | 0.816502 | 0.53164  | 1.253998 | 0.354417 |
| ZNF544   | 0.891522 | 0.705132 | 1.127182 | 0.337295 |
| TMEM229  | 1.4808   | 1.118285 | 1.96083  | 0.006138 |
| ZNF770   | 0.821425 | 0.606328 | 1.112828 | 0.204135 |
| MIER1    | 0.766687 | 0.433684 | 1.355384 | 0.360758 |
| MAN1A2   | 0.850116 | 0.538833 | 1.341228 | 0.48518  |
| SVIP     | 1.278069 | 0.895007 | 1.825081 | 0.177098 |
| ZNF251   | 0.914977 | 0.651619 | 1.284774 | 0.607905 |
| DDRKG1   | 2.350186 | 1.298795 | 4.252692 | 0.004743 |
| TFDP1    | 1.250419 | 0.875525 | 1.78584  | 0.21909  |
| CLEC4C   | 1.075139 | 0.941864 | 1.227273 | 0.28329  |
| ZNF607   | 0.802268 | 0.588177 | 1.094285 | 0.164207 |
| ZNF334   | 1.120531 | 0.966503 | 1.299107 | 0.131459 |
| HSD17B11 | 0.640559 | 0.452413 | 0.90695  | 0.012058 |
| ZXDA     | 0.904395 | 0.626865 | 1.304796 | 0.591033 |

|          |          |          |          |          |
|----------|----------|----------|----------|----------|
| RPS6KL1  | 0.832591 | 0.647133 | 1.071197 | 0.154151 |
| QRICH1   | 0.99154  | 0.508827 | 1.932191 | 0.980087 |
| CSF2RA   | 1.137683 | 0.946514 | 1.367463 | 0.169346 |
| DDX42    | 0.825734 | 0.515392 | 1.322947 | 0.425897 |
| RPL23A   | 0.975064 | 0.65427  | 1.453147 | 0.901278 |
| SLC29A3  | 1.863691 | 1.166406 | 2.977819 | 0.009221 |
| STYX     | 0.862491 | 0.564558 | 1.317653 | 0.49387  |
| UBL5     | 1.548265 | 0.996068 | 2.406588 | 0.052082 |
| HELZ     | 0.896998 | 0.597833 | 1.345869 | 0.599519 |
| TMEM116  | 1.201864 | 0.7374   | 1.958876 | 0.460671 |
| UCKL1    | 1.200665 | 0.81099  | 1.777576 | 0.360987 |
| CARD11   | 1.188429 | 0.986743 | 1.431339 | 0.068863 |
| ZNF485   | 1.009447 | 0.718437 | 1.418335 | 0.956782 |
| SDAD1    | 1.192479 | 0.740515 | 1.920292 | 0.468968 |
| HYLS1    | 0.721656 | 0.529371 | 0.983784 | 0.039077 |
| MYL4     | 0.958235 | 0.824362 | 1.113849 | 0.57845  |
| ZNF442   | 0.769399 | 0.465569 | 1.271508 | 0.30641  |
| ZNF813   | 0.857803 | 0.594673 | 1.237362 | 0.4119   |
| HOXC4    | 1.223492 | 0.908055 | 1.648506 | 0.184859 |
| PIM3     | 1.092173 | 0.844781 | 1.412012 | 0.501069 |
| ASPH     | 0.852357 | 0.674417 | 1.077245 | 0.181173 |
| SPRED2   | 1.251302 | 1.015515 | 1.541834 | 0.035335 |
| WWP2     | 1.54203  | 0.925281 | 2.569875 | 0.09652  |
| GFPT1    | 0.424327 | 0.24274  | 0.741752 | 0.002627 |
| UVRAG    | 0.985469 | 0.598146 | 1.623597 | 0.954177 |
| ZNF26    | 0.61099  | 0.369408 | 1.010558 | 0.054977 |
| ITSN2    | 1.232741 | 0.798117 | 1.904044 | 0.345512 |
| NTRK1    | 0.897711 | 0.735288 | 1.096014 | 0.289301 |
| MT1F     | 1.074791 | 0.873202 | 1.32292  | 0.496143 |
| ZNF69    | 0.662378 | 0.505034 | 0.868743 | 0.002913 |
| TXNRD1   | 0.77185  | 0.497173 | 1.198281 | 0.248526 |
| NRARP    | 1.12869  | 0.900209 | 1.415162 | 0.29418  |
| ZNF583   | 1.070518 | 0.654163 | 1.75187  | 0.786269 |
| ZNF568   | 0.84707  | 0.593254 | 1.209477 | 0.361057 |
| ZXDB     | 0.708362 | 0.442854 | 1.133053 | 0.150226 |
| ZNF480   | 0.840194 | 0.602713 | 1.171248 | 0.304261 |
| ZNF587   | 0.739228 | 0.469606 | 1.163652 | 0.191813 |
| TPM2     | 1.016691 | 0.845076 | 1.223157 | 0.8607   |
| SH3BGRL2 | 1.055353 | 0.880038 | 1.265593 | 0.561069 |
| ZNF808   | 0.817765 | 0.594061 | 1.125708 | 0.217286 |
| ANKRD35  | 0.822713 | 0.644053 | 1.050932 | 0.118225 |
| YTHDF2   | 0.984348 | 0.578627 | 1.674552 | 0.953594 |
| NBR2     | 0.503343 | 0.337446 | 0.7508   | 0.000766 |
| HLA-DRB1 | 1.220433 | 1.083745 | 1.374361 | 0.001013 |
| ATL1     | 0.860547 | 0.638584 | 1.159661 | 0.323767 |
| MAFK     | 1.073849 | 0.805545 | 1.431519 | 0.627143 |
| ZNF43    | 0.645989 | 0.493571 | 0.845475 | 0.00146  |
| GPN1     | 1.054589 | 0.566787 | 1.962215 | 0.866761 |
| PLN      | 1.045021 | 0.797245 | 1.369802 | 0.749785 |
| ZNF28    | 0.884057 | 0.634238 | 1.232277 | 0.467043 |
| ZNF511   | 2.560644 | 1.597758 | 4.103813 | 9.34E-05 |
| ZNF627   | 0.735514 | 0.532389 | 1.016139 | 0.06248  |
| KCNRG    | 0.818869 | 0.59588  | 1.125303 | 0.217915 |
| WDHD1    | 1.024642 | 0.739848 | 1.419063 | 0.883519 |
| ZNF789   | 0.640798 | 0.386356 | 1.062808 | 0.084709 |
| CTNND1   | 0.717104 | 0.497831 | 1.032956 | 0.074126 |
| SLC34A3  | 0.976171 | 0.6495   | 1.467143 | 0.907639 |
| SH2D1B   | 1.12616  | 0.879928 | 1.441295 | 0.345256 |

|          |          |          |          |          |
|----------|----------|----------|----------|----------|
| ARC      | 1.008638 | 0.808321 | 1.258598 | 0.939306 |
| NUDT16   | 1.324113 | 1.04349  | 1.680202 | 0.020872 |
| TLK1     | 0.693114 | 0.421203 | 1.140561 | 0.149182 |
| LRBA     | 1.137117 | 0.886266 | 1.458969 | 0.312262 |
| MMP17    | 1.056641 | 0.918676 | 1.215324 | 0.440249 |
| BAZ1A    | 0.98252  | 0.655554 | 1.472566 | 0.931932 |
| AKR1C4   | 1.674603 | 0.853009 | 3.287534 | 0.134126 |
| COPS8    | 0.932158 | 0.484704 | 1.792679 | 0.833236 |
| CCDC69   | 1.330738 | 0.996604 | 1.776898 | 0.052757 |
| MDM4     | 0.600471 | 0.359245 | 1.003676 | 0.051659 |
| KLHL9    | 1.044678 | 0.701313 | 1.556156 | 0.829791 |
| NCOA6    | 0.986998 | 0.611311 | 1.593567 | 0.957298 |
| STK39    | 1.045511 | 0.606188 | 1.803224 | 0.872855 |
| CALM1    | 1.476005 | 0.950523 | 2.291991 | 0.082923 |
| TTC37    | 0.733281 | 0.511523 | 1.051175 | 0.091345 |
| TUSC1    | 1.003644 | 0.850938 | 1.183754 | 0.965548 |
| PAPSS2   | 1.183289 | 0.946774 | 1.478887 | 0.139078 |
| SLC9A6   | 1.836486 | 1.06958  | 3.153278 | 0.027535 |
| EIF1AY   | 0.990688 | 0.906033 | 1.083252 | 0.837343 |
| IPO9     | 1.054719 | 0.657736 | 1.691305 | 0.825005 |
| CEP290   | 0.590198 | 0.404031 | 0.862147 | 0.006389 |
| DLL1     | 0.839351 | 0.678175 | 1.038833 | 0.10745  |
| ANKRD13f | 0.786294 | 0.605962 | 1.020291 | 0.070477 |
| UNC13B   | 0.99179  | 0.808193 | 1.217095 | 0.937087 |
| LDB1     | 1.036667 | 0.735178 | 1.461794 | 0.837273 |
| PPP1R14C | 0.920554 | 0.688781 | 1.230316 | 0.575909 |
| CTR9     | 0.93168  | 0.644259 | 1.347327 | 0.706925 |
| F5       | 1.058118 | 0.908539 | 1.232324 | 0.467546 |
| ZNF652   | 0.728202 | 0.48531  | 1.092658 | 0.125532 |
| SMURF1   | 0.898266 | 0.574153 | 1.405344 | 0.638477 |
| SLC5A3   | 0.802075 | 0.611299 | 1.052388 | 0.111497 |
| GPATCH3  | 1.479515 | 0.781265 | 2.801818 | 0.22924  |
| CDC42BPE | 0.936473 | 0.784373 | 1.118066 | 0.467944 |
| PLXNB3   | 1.18855  | 0.874529 | 1.615329 | 0.269817 |
| OXCT2    | 2.057566 | 1.280187 | 3.306998 | 0.002881 |
| RPL10A   | 1.160787 | 0.781499 | 1.724156 | 0.460137 |
| RCSD1    | 1.203365 | 0.868075 | 1.668159 | 0.266594 |
| FAM169A  | 1.163439 | 0.945793 | 1.43117  | 0.151985 |
| ZNF830   | 1.467143 | 0.903178 | 2.383259 | 0.121488 |
| GRIN3A   | 0.850843 | 0.448531 | 1.614011 | 0.62097  |
| CNOT7    | 0.698105 | 0.427884 | 1.138976 | 0.150167 |
| TMEM184l | 0.865712 | 0.609646 | 1.229331 | 0.420258 |
| SCAMP5   | 1.421142 | 1.15321  | 1.751324 | 0.000976 |
| ZNF521   | 1.011339 | 0.91621  | 1.116346 | 0.822979 |
| LRIG2    | 0.520751 | 0.28753  | 0.943141 | 0.031308 |
| GK       | 0.608622 | 0.390961 | 0.947463 | 0.027881 |
| FOXJ3    | 0.776014 | 0.462843 | 1.301085 | 0.336174 |
| ZNF358   | 1.074329 | 0.853566 | 1.35219  | 0.541274 |
| SFT2D1   | 0.921109 | 0.5102   | 1.66296  | 0.785137 |
| CD247    | 1.02327  | 0.841729 | 1.243965 | 0.817431 |
| INPP5F   | 1.726904 | 1.095129 | 2.723147 | 0.018722 |
| ARHGAP11 | 1.183078 | 0.883272 | 1.584647 | 0.259522 |
| SUCNR1   | 0.963747 | 0.841898 | 1.103232 | 0.592353 |
| HMG2     | 1.045543 | 0.662748 | 1.649433 | 0.84816  |
| UBE2J1   | 1.288138 | 0.897418 | 1.84897  | 0.169741 |
| GJC2     | 1.418384 | 1.083541 | 1.856701 | 0.010961 |
| OPA1     | 0.90935  | 0.558786 | 1.479847 | 0.702117 |
| DENND4B  | 1.261501 | 0.854164 | 1.863092 | 0.242951 |

|          |          |          |          |          |
|----------|----------|----------|----------|----------|
| RYR3     | 0.71144  | 0.506339 | 0.999621 | 0.049745 |
| ZNF277   | 0.779005 | 0.549342 | 1.104683 | 0.161118 |
| KTI12    | 0.944564 | 0.532607 | 1.675159 | 0.845316 |
| TOX      | 0.877486 | 0.73136  | 1.052809 | 0.159653 |
| CES1     | 1.056766 | 0.958626 | 1.164954 | 0.266877 |
| CD3E     | 1.106784 | 0.910284 | 1.345703 | 0.308971 |
| RUSC2    | 1.327329 | 1.037832 | 1.697579 | 0.024084 |
| FICD     | 1.070128 | 0.604474 | 1.894495 | 0.816089 |
| OSTC     | 0.680246 | 0.419989 | 1.10178  | 0.117345 |
| TSEN15   | 1.032937 | 0.54999  | 1.939961 | 0.919729 |
| RUNDC1   | 0.904528 | 0.52388  | 1.561752 | 0.718775 |
| CCDC152  | 1.06165  | 0.833111 | 1.35288  | 0.628604 |
| GRK5     | 1.18039  | 0.893526 | 1.559352 | 0.243024 |
| TYW1     | 0.562493 | 0.332896 | 0.950443 | 0.031565 |
| SFMBT2   | 0.887125 | 0.720291 | 1.092602 | 0.259835 |
| PNMA5    | 0.910026 | 0.719876 | 1.150402 | 0.430479 |
| ITPRIPL1 | 1.186607 | 0.878919 | 1.602008 | 0.263901 |
| SMC5     | 0.486447 | 0.324547 | 0.72911  | 0.000483 |
| PRMT6    | 1.085928 | 0.676927 | 1.742048 | 0.732462 |
| SHISA4   | 1.43681  | 1.078533 | 1.914102 | 0.013265 |
| CAPZA2   | 1.144111 | 0.786859 | 1.663565 | 0.480876 |
| TOP1     | 0.985676 | 0.618259 | 1.571441 | 0.951658 |
| PRC1     | 0.878987 | 0.466103 | 1.657611 | 0.690247 |
| MAP3K3   | 1.203487 | 0.867879 | 1.668874 | 0.266811 |
| L1CAM    | 1.142236 | 0.747009 | 1.746569 | 0.539361 |
| SREBF2   | 1.555285 | 1.069309 | 2.262124 | 0.020858 |
| RASGEF1A | 1.413985 | 1.016535 | 1.966833 | 0.039651 |
| RPL39    | 0.765803 | 0.537441 | 1.091197 | 0.139703 |
| DZIP3    | 1.064332 | 0.764018 | 1.48269  | 0.712419 |
| KIAA0753 | 0.651358 | 0.410422 | 1.033734 | 0.068885 |
| DCLRE1A  | 1.228654 | 0.886836 | 1.702221 | 0.215729 |
| ATG9A    | 0.981099 | 0.723574 | 1.330278 | 0.902236 |
| NOS1AP   | 1.149171 | 0.858166 | 1.538857 | 0.350677 |
| APRT     | 1.325153 | 0.896959 | 1.95776  | 0.157408 |
| GPRASP1  | 0.714593 | 0.517175 | 0.98737  | 0.041649 |
| TBKBP1   | 0.925101 | 0.706355 | 1.21159  | 0.571675 |
| MAGEE1   | 1.130603 | 0.777756 | 1.643528 | 0.520145 |
| ZFP2     | 0.873324 | 0.647583 | 1.177756 | 0.374703 |
| L3MBTL3  | 1.159275 | 0.845396 | 1.58969  | 0.35892  |
| MFAP3L   | 1.023137 | 0.795965 | 1.315146 | 0.858283 |
| NAGA     | 1.225697 | 0.996806 | 1.507147 | 0.053652 |
| SMG5     | 1.46464  | 0.977738 | 2.194014 | 0.064202 |
| TGM2     | 1.136058 | 0.94081  | 1.371825 | 0.184898 |
| ARMCX6   | 0.994708 | 0.624409 | 1.584609 | 0.982183 |
| PJA2     | 0.713921 | 0.502842 | 1.013606 | 0.059512 |
| SGMS1    | 1.276241 | 0.952681 | 1.709692 | 0.102044 |
| OR10Z1   | 0.810377 | 0.593691 | 1.106148 | 0.185348 |
| MIR30E   | 1.083278 | 0.882998 | 1.328986 | 0.443116 |
| MIR429   | 0.850557 | 0.657169 | 1.100853 | 0.21874  |
| MIR345   | 0.752394 | 0.599986 | 0.943516 | 0.013763 |
| MIR16-2  | 0.976773 | 0.758585 | 1.257717 | 0.85542  |
| MIR340   | 0.793624 | 0.672842 | 0.936089 | 0.006069 |
| MIR339   | 1.240733 | 0.992076 | 1.551714 | 0.058725 |
| MIRLET7C | 1.092264 | 0.906111 | 1.316662 | 0.354579 |
| MIR425   | 0.938866 | 0.761716 | 1.157214 | 0.554319 |
| MIR210   | 1.077766 | 0.903993 | 1.284942 | 0.403818 |
| MIR324   | 1.039706 | 0.821233 | 1.316299 | 0.746291 |
| MIR101-2 | 0.793219 | 0.55652  | 1.130589 | 0.200136 |

|          |          |          |          |          |
|----------|----------|----------|----------|----------|
| MIR26A1  | 0.942061 | 0.7807   | 1.136773 | 0.533521 |
| MIR342   | 0.947524 | 0.777067 | 1.155372 | 0.594239 |
| MIR326   | 0.906931 | 0.715325 | 1.14986  | 0.419806 |
| MIR302C  | 1.167296 | 0.948987 | 1.435825 | 0.143108 |
| MIR26B   | 1.004046 | 0.819331 | 1.230404 | 0.968951 |
| MIR148B  | 0.868638 | 0.659803 | 1.143571 | 0.315494 |
| MIR101-1 | 1.022264 | 0.811002 | 1.288558 | 0.852111 |
| MIR373   | 1.067326 | 0.951146 | 1.197698 | 0.267811 |
| MIR302D  | 1.149998 | 0.907329 | 1.457569 | 0.247784 |
| MIRLET7G | 0.843268 | 0.694373 | 1.024089 | 0.085465 |
| MIR30D   | 0.883438 | 0.616006 | 1.266973 | 0.500512 |
| MIR126   | 1.043162 | 0.868338 | 1.253183 | 0.651622 |
| MIR374A  | 0.787413 | 0.617102 | 1.004726 | 0.0546   |
| MIR367   | 1.13311  | 0.912534 | 1.407003 | 0.257916 |
| MIR331   | 1.071698 | 0.878884 | 1.306812 | 0.493825 |
| MIRLET7I | 0.952009 | 0.690081 | 1.313355 | 0.764502 |
| SNORD114 | 0.695498 | 0.535521 | 0.903266 | 0.006473 |
| SNORD9   | 0.801741 | 0.564482 | 1.138722 | 0.217085 |
| SNORA63  | 0.723372 | 0.493145 | 1.061082 | 0.09759  |
| SNORA31  | 0.844876 | 0.625291 | 1.141573 | 0.272328 |
| SNORD104 | 1.350516 | 1.105334 | 1.650083 | 0.003285 |
| SNORD1B  | 0.913702 | 0.733511 | 1.138157 | 0.420659 |
| VTRNA1-1 | 0.915828 | 0.728123 | 1.151922 | 0.452431 |
| SNORA73I | 1.314876 | 1.03479  | 1.670772 | 0.025105 |
| SNORA70  | 0.647576 | 0.368005 | 1.139532 | 0.131819 |
| SNORA72  | 0.695808 | 0.462979 | 1.045726 | 0.08101  |
| SNORA38I | 0.836282 | 0.639266 | 1.094016 | 0.192097 |
| SNORA33  | 0.974553 | 0.692546 | 1.371392 | 0.882425 |
| RNU4-1   | 0.995747 | 0.847804 | 1.169507 | 0.958581 |
| SNORA38  | 0.633977 | 0.48634  | 0.826432 | 0.000753 |
| SNORD46  | 1.092187 | 0.77435  | 1.540483 | 0.61528  |
| SNORA74I | 1.034686 | 0.783558 | 1.366299 | 0.810029 |
| RNY1     | 0.959032 | 0.783832 | 1.173393 | 0.684436 |
| SNORA62  | 0.755067 | 0.470527 | 1.211676 | 0.244311 |
| SNORA65  | 1.532061 | 1.067606 | 2.198574 | 0.020616 |
| RNU105B  | 0.866393 | 0.699847 | 1.072572 | 0.187927 |
| SNORA16I | 0.915001 | 0.670442 | 1.24877  | 0.57559  |
| SNORA14I | 1.059601 | 0.861036 | 1.303957 | 0.584519 |
| SNORD11I | 0.765373 | 0.623081 | 0.94016  | 0.010836 |
| SNORA5C  | 0.921255 | 0.689453 | 1.23099  | 0.579145 |
| SNORD11I | 0.686306 | 0.520468 | 0.904986 | 0.007644 |
| SNORD48  | 1.081767 | 0.878247 | 1.33245  | 0.459847 |
| SNORD114 | 0.755614 | 0.600491 | 0.950811 | 0.016839 |
| SNORA23  | 0.902162 | 0.696478 | 1.168588 | 0.435459 |
| VTRNA1-2 | 0.929611 | 0.65679  | 1.315758 | 0.680494 |
| SNORD11I | 0.626355 | 0.455843 | 0.860648 | 0.003907 |
| SNORD6   | 1.043914 | 0.775997 | 1.40433  | 0.7764   |
| RNY3     | 0.964521 | 0.606274 | 1.534456 | 0.878801 |
| RNU4-2   | 1.015238 | 0.879703 | 1.171654 | 0.836129 |
| MIR146B  | 1.034693 | 0.823065 | 1.300735 | 0.770195 |
| MIR582   | 1.257102 | 0.902778 | 1.750493 | 0.175578 |
| ZNF525   | 0.881643 | 0.614364 | 1.265202 | 0.494268 |
| INF2     | 1.248488 | 0.981248 | 1.58851  | 0.07093  |
| EFCAB2   | 0.900398 | 0.663242 | 1.222354 | 0.501149 |
| CHML     | 1.038277 | 0.736447 | 1.463811 | 0.830282 |
| TATDN3   | 1.240221 | 0.762553 | 2.017101 | 0.385633 |
| CR1      | 0.947251 | 0.832852 | 1.077365 | 0.409253 |
| ECT2L    | 0.801144 | 0.542383 | 1.183355 | 0.26526  |

|          |          |          |          |          |
|----------|----------|----------|----------|----------|
| GPR52    | 0.826674 | 0.636872 | 1.073043 | 0.152648 |
| FCGR3A   | 1.074983 | 0.964326 | 1.198339 | 0.192042 |
| OR6K3    | 0.206703 | 0.060479 | 0.706459 | 0.011932 |
| MSTO2P   | 0.908223 | 0.62961  | 1.310127 | 0.606579 |
| SPRN     | 0.647653 | 0.423986 | 0.98931  | 0.044465 |
| FANK1    | 0.764989 | 0.516076 | 1.133958 | 0.182213 |
| DDO      | 1.074361 | 0.90654  | 1.273249 | 0.407843 |
| SNHG5    | 1.093878 | 0.81016  | 1.476953 | 0.55806  |
| GDI1     | 1.301031 | 0.89659  | 1.887911 | 0.165951 |
| PCMTD2   | 0.820106 | 0.548553 | 1.226087 | 0.333761 |
| SOX18    | 1.301678 | 1.069889 | 1.583683 | 0.00841  |
| LIME1    | 0.96898  | 0.676517 | 1.387878 | 0.863518 |
| SAMD13   | 0.933853 | 0.64549  | 1.351037 | 0.716455 |
| EFCAB7   | 0.710671 | 0.464086 | 1.088276 | 0.11621  |
| LCN8     | 1.242195 | 0.970039 | 1.590706 | 0.085636 |
| LIPN     | 1.076462 | 0.896135 | 1.293076 | 0.430904 |
| FOXO6    | 0.750015 | 0.524374 | 1.072753 | 0.115173 |
| SYS1     | 1.159232 | 0.649777 | 2.068124 | 0.616883 |
| INPP5B   | 1.35383  | 0.818483 | 2.239334 | 0.238061 |
| RPA4     | 0.850282 | 0.583673 | 1.238673 | 0.398159 |
| NEU4     | 1.063164 | 0.900982 | 1.25454  | 0.468284 |
| MAFB     | 1.12175  | 1.022093 | 1.231123 | 0.015507 |
| TRAF3IP1 | 0.936881 | 0.559595 | 1.56854  | 0.804161 |
| BMP2KL   | 0.713888 | 0.530735 | 0.960244 | 0.02587  |
| CHIC1    | 1.254827 | 1.025174 | 1.535924 | 0.027733 |
| GIGYF2   | 0.831319 | 0.441787 | 1.564308 | 0.56681  |
| RUFY2    | 0.397446 | 0.23665  | 0.667497 | 0.000487 |
| NHSL2    | 1.090859 | 0.939521 | 1.266575 | 0.253756 |
| GGTA1    | 1.005707 | 0.812843 | 1.244333 | 0.958218 |
| PHACTR4  | 1.101384 | 0.578019 | 2.098629 | 0.769088 |
| AGAP6    | 0.752825 | 0.42609  | 1.330106 | 0.328231 |
| TIMM23B  | 0.730192 | 0.458153 | 1.163758 | 0.186083 |
| ZDHHC18  | 1.590086 | 0.986092 | 2.564035 | 0.057104 |
| ZDBF2    | 0.922943 | 0.584452 | 1.457473 | 0.730855 |
| GGNBP1   | 1.502263 | 1.096884 | 2.057461 | 0.011204 |
| DAXX     | 3.588589 | 1.757152 | 7.328888 | 0.000453 |
| BMPR2    | 0.956248 | 0.803657 | 1.13781  | 0.613984 |
| TCEA3    | 0.796753 | 0.572095 | 1.109633 | 0.178813 |
| PFDN6    | 2.007015 | 1.058615 | 3.805074 | 0.032803 |
| RING1    | 1.681802 | 1.050783 | 2.691762 | 0.030281 |
| HSD17B8  | 1.1085   | 0.77736  | 1.580698 | 0.569401 |
| RXR8     | 1.172536 | 0.662418 | 2.075488 | 0.584844 |
| COL11A2  | 1.038764 | 0.611028 | 1.765926 | 0.888289 |
| HLA-DOA  | 1.124112 | 0.985155 | 1.282669 | 0.082246 |
| BRD2     | 1.087086 | 0.586004 | 2.016635 | 0.791126 |
| HLA-DMA  | 1.395261 | 1.158573 | 1.680303 | 0.000445 |
| COL5A2   | 0.90967  | 0.587737 | 1.40794  | 0.670976 |
| PSMB8    | 2.259244 | 1.445102 | 3.532056 | 0.00035  |
| TAP2     | 1.358399 | 0.96949  | 1.903319 | 0.07509  |
| SPIN3    | 0.898201 | 0.62206  | 1.296925 | 0.566775 |
| HLA-DRA  | 1.25182  | 1.086702 | 1.442028 | 0.001858 |
| NOTCH4   | 1.593275 | 1.10122  | 2.305193 | 0.013452 |
| PBX2     | 0.719615 | 0.406306 | 1.274522 | 0.259225 |
| AGER     | 0.914624 | 0.591842 | 1.413448 | 0.687801 |
| RNF5     | 1.451684 | 0.929849 | 2.266374 | 0.101016 |
| AGPAT1   | 1.391581 | 0.828786 | 2.336548 | 0.211399 |
| PRRT1    | 0.826882 | 0.547342 | 1.249191 | 0.366516 |
| FKBPL    | 1.445146 | 0.914329 | 2.284131 | 0.114912 |



|          |          |          |          |          |
|----------|----------|----------|----------|----------|
| MRPL38   | 0.886704 | 0.527208 | 1.491336 | 0.650338 |
| STK19    | 1.064362 | 0.563773 | 2.009438 | 0.847444 |
| SKIV2L   | 1.369721 | 0.858585 | 2.18515  | 0.18678  |
| ZBTB12   | 0.612624 | 0.413215 | 0.908262 | 0.014732 |
| SDHD     | 1.401038 | 0.922276 | 2.128328 | 0.113948 |
| EHMT2    | 0.924182 | 0.623383 | 1.370125 | 0.694707 |
| LAYN     | 0.99028  | 0.794522 | 1.23427  | 0.930735 |
| SLC44A4  | 1.163042 | 0.869321 | 1.556004 | 0.309152 |
| NEU1     | 1.278817 | 0.844109 | 1.937397 | 0.245902 |
| HSPA1B   | 1.356361 | 1.066233 | 1.725435 | 0.013056 |
| HSPA1A   | 1.231794 | 0.924477 | 1.64127  | 0.154537 |
| HSPA1L   | 1.387813 | 0.74997  | 2.568135 | 0.296631 |
| LSM2     | 1.154389 | 0.719511 | 1.852112 | 0.551694 |
| CARD16   | 1.371935 | 1.113332 | 1.690607 | 0.003003 |
| MBD5     | 0.828145 | 0.53308  | 1.286534 | 0.401483 |
| MSH5     | 0.750995 | 0.496934 | 1.134947 | 0.174101 |
| LY6G6C   | 0.873276 | 0.688746 | 1.107245 | 0.26322  |
| LY6G6F   | 1.472633 | 1.070355 | 2.026103 | 0.017425 |
| LY6G5C   | 1.888117 | 1.207319 | 2.95281  | 0.005341 |
| CSNK2B   | 1.473669 | 0.714436 | 3.039742 | 0.293866 |
| APOM     | 1.215279 | 0.75844  | 1.947289 | 0.41763  |
| AIF1     | 1.459537 | 1.139562 | 1.869358 | 0.002748 |
| NCR3     | 1.47695  | 1.076643 | 2.026097 | 0.015614 |
| LST1     | 1.382103 | 1.154669 | 1.654335 | 0.000419 |
| NFKBIL1  | 1.915728 | 1.166432 | 3.14636  | 0.010225 |
| MCCD1    | 0.750267 | 0.431552 | 1.304361 | 0.308544 |
| MICB     | 1.447608 | 0.93144  | 2.249818 | 0.100122 |
| ZNF551   | 0.808599 | 0.602796 | 1.084664 | 0.15629  |
| MICA     | 1.034055 | 0.684394 | 1.562361 | 0.873642 |
| ZNF805   | 0.658312 | 0.377455 | 1.14815  | 0.140707 |
| HLA-C    | 1.251973 | 0.924999 | 1.694527 | 0.145633 |
| PSORS1C3 | 0.927813 | 0.659977 | 1.304345 | 0.666383 |
| POU5F1   | 1.10846  | 0.64184  | 1.914314 | 0.71185  |
| CCHCR1   | 1.262815 | 0.807185 | 1.975634 | 0.306831 |
| DHX16    | 1.813998 | 1.039019 | 3.167014 | 0.036207 |
| MRPS18B  | 2.413145 | 1.36444  | 4.267882 | 0.002461 |
| PPP1R10  | 1.218806 | 0.722769 | 2.055275 | 0.457973 |
| ABCF1    | 1.489661 | 0.816774 | 2.716897 | 0.193648 |
| PRR3     | 1.136976 | 0.690318 | 1.872637 | 0.61409  |
| LILRB3   | 1.169996 | 1.034412 | 1.323352 | 0.012477 |
| DDR1     | 1.078486 | 0.856048 | 1.358722 | 0.521441 |
| GNL1     | 1.089811 | 0.729389 | 1.628331 | 0.674644 |
| HLA-E    | 1.59243  | 1.141795 | 2.220918 | 0.006121 |
| TRIM39   | 1.600062 | 0.765038 | 3.346497 | 0.211832 |
| ZNF468   | 0.936404 | 0.61567  | 1.424224 | 0.758753 |
| TRIM15   | 1.14684  | 0.884989 | 1.486166 | 0.300177 |
| ZNF616   | 0.837446 | 0.613414 | 1.143298 | 0.264055 |
| TRIM10   | 0.922984 | 0.783033 | 1.087948 | 0.339451 |
| RNF39    | 0.883834 | 0.588964 | 1.326333 | 0.550995 |
| PPP1R11  | 1.634585 | 0.811657 | 3.291868 | 0.168904 |
| HCG9     | 0.930741 | 0.6985   | 1.240199 | 0.624078 |
| HLA-G    | 1.039939 | 0.816723 | 1.324161 | 0.750731 |
| TBC1D8   | 1.007318 | 0.806526 | 1.258099 | 0.948747 |
| HLA-F    | 1.222485 | 0.991578 | 1.507161 | 0.060001 |
| ZFP57    | 1.067018 | 0.949748 | 1.198768 | 0.274829 |
| CBY3     | 0.799139 | 0.522833 | 1.221468 | 0.300295 |
| IL31     | 0.864649 | 0.622712 | 1.200583 | 0.385179 |
| AKT1S1   | 1.459368 | 0.902385 | 2.360141 | 0.123273 |

|          |          |          |          |          |
|----------|----------|----------|----------|----------|
| GABBR1   | 1.015202 | 0.896988 | 1.148996 | 0.811211 |
| SPDYC    | 1.191917 | 0.873622 | 1.626178 | 0.268037 |
| TRIM27   | 0.731926 | 0.423442 | 1.265145 | 0.263709 |
| RANBP17  | 1.234429 | 0.978628 | 1.557094 | 0.075466 |
| TTC25    | 0.778328 | 0.569867 | 1.063046 | 0.115122 |
| ATXN2    | 0.727669 | 0.373045 | 1.419405 | 0.351045 |
| DCTN1    | 1.608689 | 0.964097 | 2.684252 | 0.06876  |
| TCTN1    | 0.652624 | 0.448256 | 0.950168 | 0.025969 |
| ZBTB48   | 1.263183 | 0.802621 | 1.988025 | 0.312629 |
| NAT8B    | 0.90233  | 0.677849 | 1.201152 | 0.48132  |
| ZNF155   | 0.710556 | 0.466046 | 1.083348 | 0.112301 |
| FBXO48   | 1.033763 | 0.616374 | 1.733794 | 0.899844 |
| CD177    | 0.929973 | 0.742295 | 1.165102 | 0.527864 |
| ZNF783   | 1.416176 | 0.918275 | 2.184046 | 0.115433 |
| ZNF425   | 0.772048 | 0.516869 | 1.153209 | 0.206345 |
| TRIM13   | 0.756828 | 0.496688 | 1.153217 | 0.194779 |
| SPIRE2   | 1.034059 | 0.590147 | 1.811885 | 0.906831 |
| PKHD1L1  | 1.274257 | 0.835928 | 1.942427 | 0.259835 |
| SLFN12L  | 0.9444   | 0.651964 | 1.368007 | 0.762217 |
| SLC35B4  | 1.073299 | 0.694239 | 1.659331 | 0.750315 |
| SYCE1L   | 1.004721 | 0.626851 | 1.610374 | 0.984388 |
| TMEM231  | 1.164098 | 0.803312 | 1.68692  | 0.422084 |
| FAM71F2  | 0.940656 | 0.683349 | 1.294849 | 0.707504 |
| CCNI2    | 0.689709 | 0.351014 | 1.355211 | 0.281053 |
| CDKL4    | 1.014357 | 0.6862   | 1.499448 | 0.943012 |
| SDHAF1   | 1.664636 | 1.009988 | 2.743612 | 0.045614 |
| PSENE1   | 1.137663 | 0.794128 | 1.62981  | 0.481935 |
| ZBTB10   | 0.66277  | 0.486283 | 0.903308 | 0.009223 |
| CCDC144A | 1.139115 | 0.862376 | 1.504661 | 0.359006 |
| LGR4     | 0.75244  | 0.599438 | 0.944495 | 0.014194 |
| PSMB10   | 2.132021 | 1.352218 | 3.361525 | 0.001119 |
| E2F4     | 1.476111 | 0.954311 | 2.283223 | 0.080149 |
| PDE7A    | 0.935531 | 0.661565 | 1.32295  | 0.706212 |
| TMEM170A | 0.927433 | 0.766599 | 1.122011 | 0.438189 |
| SNX2     | 1.463121 | 0.972824 | 2.200524 | 0.067602 |
| NT5M     | 0.952905 | 0.744154 | 1.220217 | 0.702186 |
| IPO7     | 0.918885 | 0.637809 | 1.32383  | 0.649759 |
| PRR13    | 2.080969 | 1.277808 | 3.388952 | 0.003228 |
| TECPR1   | 1.240701 | 0.853826 | 1.802872 | 0.257989 |
| MT1H     | 1.153184 | 0.748119 | 1.777568 | 0.518563 |
| MT1M     | 1.176323 | 0.680276 | 2.034082 | 0.561116 |
| SAMD9    | 1.003898 | 0.768439 | 1.311505 | 0.977239 |
| ATP6AP1L | 0.760849 | 0.527149 | 1.098157 | 0.144331 |
| C2CD4B   | 0.743823 | 0.484564 | 1.141796 | 0.175891 |
| NAP1L4   | 1.039626 | 0.580501 | 1.861878 | 0.896007 |
| TMSB4X   | 1.18376  | 0.852677 | 1.643398 | 0.313539 |
| CPT1B    | 1.358661 | 0.910922 | 2.026473 | 0.132947 |
| SMN2     | 0.706371 | 0.514243 | 0.970282 | 0.031855 |
| SERF1B   | 0.301331 | 0.150959 | 0.601488 | 0.00067  |
| HMG1     | 0.798347 | 0.510699 | 1.248012 | 0.323148 |
| STAG3L1  | 0.687562 | 0.472626 | 1.000245 | 0.05015  |
| MUC19    | 0.739718 | 0.52052  | 1.051222 | 0.09269  |
| EIF3CL   | 1.035907 | 0.598006 | 1.794468 | 0.899856 |
| LCMT1    | 0.679218 | 0.40987  | 1.125569 | 0.133365 |
| MFSD2B   | 0.819464 | 0.679197 | 0.988698 | 0.037651 |
| LIN52    | 0.730827 | 0.355921 | 1.500637 | 0.392968 |
| DPF3     | 1.033562 | 0.678997 | 1.573276 | 0.877616 |
| ITSN1    | 0.961398 | 0.708862 | 1.3039   | 0.800109 |

|          |          |          |          |          |
|----------|----------|----------|----------|----------|
| ITPRIPL2 | 1.191987 | 0.954655 | 1.488321 | 0.121064 |
| DENND1C  | 1.156807 | 0.808179 | 1.655823 | 0.425996 |
| CRLF2    | 1.030641 | 0.902354 | 1.177167 | 0.656317 |
| CRYZL1   | 0.863639 | 0.510153 | 1.462057 | 0.585206 |
| RP9P     | 0.945536 | 0.74099  | 1.206547 | 0.652504 |
| CATSPER2 | 0.604526 | 0.399609 | 0.914523 | 0.017171 |
| ARRDC5   | 1.151437 | 0.876282 | 1.512992 | 0.311501 |
| LOH12CR2 | 1.722082 | 0.95472  | 3.106217 | 0.070919 |
| KLRC2    | 0.911751 | 0.548066 | 1.516771 | 0.722012 |
| KLRC3    | 0.704182 | 0.36454  | 1.360271 | 0.296469 |
| RFPL3S   | 0.972841 | 0.408769 | 2.31529  | 0.950372 |
| OLIG2    | 0.788751 | 0.643356 | 0.967006 | 0.022448 |
| RNPS1    | 1.131601 | 0.701523 | 1.825343 | 0.612298 |
| HSP90AB2 | 0.847831 | 0.56095  | 1.281429 | 0.433455 |
| NYNRIN   | 1.132163 | 0.964484 | 1.328993 | 0.129067 |
| DNAJC19  | 0.735255 | 0.401695 | 1.345798 | 0.318723 |
| IFITM5   | 0.983097 | 0.753803 | 1.282138 | 0.89988  |
| DEFA1    | 0.216609 | 0.011354 | 4.132294 | 0.30924  |
| DOK6     | 0.960063 | 0.632948 | 1.456234 | 0.847945 |
| ZDHHC11I | 1.146283 | 0.936526 | 1.40302  | 0.185505 |
| TMEM191I | 2.165125 | 0.841858 | 5.568362 | 0.108981 |
| HBA1     | 0.923354 | 0.835542 | 1.020395 | 0.117821 |
| HBM      | 0.884955 | 0.785464 | 0.997049 | 0.044587 |
| ATP10A   | 1.187038 | 1.017384 | 1.384984 | 0.029333 |
| HCP5     | 1.322172 | 1.078525 | 1.62086  | 0.007201 |
| HLA-H    | 1.291299 | 1.001338 | 1.665226 | 0.048807 |
| HCG27    | 1.232596 | 0.958567 | 1.584963 | 0.103078 |
| COL6A6   | 1.134899 | 0.829647 | 1.552462 | 0.428569 |
| RAB12    | 1.258643 | 0.751911 | 2.106876 | 0.381486 |
| HLA-A    | 1.152341 | 0.867801 | 1.530177 | 0.32709  |
| LNP1     | 0.594841 | 0.389294 | 0.908918 | 0.01633  |
| VGLL3    | 0.973936 | 0.710731 | 1.334613 | 0.869498 |
| TRIM71   | 0.976328 | 0.856307 | 1.113171 | 0.720366 |
| ANKRD28  | 0.887166 | 0.698856 | 1.126216 | 0.325354 |
| COLQ     | 0.996297 | 0.719835 | 1.378938 | 0.982153 |
| METTL6   | 1.109425 | 0.659491 | 1.866324 | 0.695576 |
| SNORA2A  | 0.700502 | 0.519198 | 0.945119 | 0.019842 |
| SNORA69  | 0.969358 | 0.73139  | 1.284752 | 0.828566 |
| RNU6-1   | 1.079748 | 0.818442 | 1.424481 | 0.587307 |
| SNORA22  | 0.722446 | 0.545519 | 0.956755 | 0.023304 |
| SNORD10I | 0.7825   | 0.601444 | 1.018059 | 0.06775  |
| SNORA30  | 0.843934 | 0.665169 | 1.070741 | 0.162365 |
| SNORD37  | 0.968311 | 0.776927 | 1.20684  | 0.774409 |
| SNORA5A  | 0.93708  | 0.724967 | 1.211254 | 0.619685 |
| SNORA75  | 1.288853 | 0.854786 | 1.943342 | 0.225858 |
| SNORA70I | 0.904238 | 0.63849  | 1.280596 | 0.570742 |
| SNORD15I | 1.111509 | 0.805457 | 1.533854 | 0.519988 |
| SNORD63  | 0.764612 | 0.541044 | 1.080561 | 0.128286 |
| SNORA54  | 0.667795 | 0.464193 | 0.9607   | 0.029553 |
| SNORA36I | 0.843974 | 0.666436 | 1.068807 | 0.159207 |
| SNORD59I | 0.765672 | 0.547197 | 1.071376 | 0.119297 |
| SNORD51  | 0.933398 | 0.756528 | 1.15162  | 0.520232 |
| SNORA7B  | 1.252599 | 0.900635 | 1.742108 | 0.180847 |
| SNORA15  | 1.006003 | 0.767455 | 1.3187   | 0.96543  |
| SNORA14I | 0.764853 | 0.574066 | 1.019046 | 0.067087 |
| SNORA37  | 0.777578 | 0.602651 | 1.003279 | 0.053017 |
| SNORA2B  | 0.715556 | 0.539434 | 0.949181 | 0.020245 |
| SNORA20  | 0.870571 | 0.661819 | 1.145168 | 0.321733 |

|          |          |          |          |          |
|----------|----------|----------|----------|----------|
| SNORD56I | 0.851964 | 0.721652 | 1.005808 | 0.058547 |
| SNORD15I | 0.882273 | 0.655202 | 1.18804  | 0.409359 |
| SNORA19  | 0.668424 | 0.513547 | 0.870009 | 0.002741 |
| SNORA46  | 0.855668 | 0.675608 | 1.083718 | 0.196    |
| RNU1-3   | 1.198948 | 0.563541 | 2.550795 | 0.637604 |
| SNORA66  | 1.063617 | 0.759292 | 1.489916 | 0.719856 |
| MIR25    | 0.694174 | 0.535224 | 0.900328 | 0.005935 |
| MIR647   | 1.155732 | 0.816352 | 1.636202 | 0.414508 |
| MIR635   | 0.997924 | 0.823008 | 1.210016 | 0.983139 |
| MIR23B   | 1.015563 | 0.814955 | 1.265553 | 0.890604 |
| MIR199B  | 0.73433  | 0.59588  | 0.904949 | 0.003768 |
| MIR30B   | 0.637975 | 0.388911 | 1.046543 | 0.075106 |
| MIR606   | 0.835051 | 0.731658 | 0.953056 | 0.00752  |
| MIR593   | 0.853424 | 0.684096 | 1.064664 | 0.160123 |
| MIR215   | 0.779927 | 0.603842 | 1.007359 | 0.056936 |
| MIR181A2 | 1.080948 | 0.926695 | 1.260876 | 0.321759 |
| MIR191   | 1.083384 | 0.869085 | 1.350526 | 0.476338 |
| MIR554   | 0.943346 | 0.760022 | 1.170889 | 0.596803 |
| MIR200A  | 0.889533 | 0.67862  | 1.165998 | 0.396579 |
| MIR491   | 1.034547 | 0.84767  | 1.262623 | 0.738286 |
| MIR149   | 1.02187  | 0.761583 | 1.371114 | 0.88532  |
| MIR604   | 0.915967 | 0.745497 | 1.125418 | 0.403488 |
| MIR181C  | 0.884037 | 0.700629 | 1.115457 | 0.298828 |
| MIR193A  | 0.881898 | 0.485346 | 1.602451 | 0.680002 |
| MIR194-1 | 0.75193  | 0.601785 | 0.939535 | 0.012115 |
| MIR128-2 | 0.811248 | 0.691599 | 0.951597 | 0.010188 |
| MIR562   | 0.704789 | 0.576657 | 0.861392 | 0.000632 |
| MIR581   | 0.97623  | 0.774071 | 1.231187 | 0.838975 |
| MIR651   | 0.980393 | 0.788349 | 1.219218 | 0.858704 |
| MIR641   | 0.899766 | 0.742506 | 1.090333 | 0.281209 |
| MIR505   | 0.885507 | 0.72266  | 1.085051 | 0.240909 |
| MIR99A   | 1.110514 | 0.908399 | 1.357599 | 0.306464 |
| MIR571   | 0.761382 | 0.612011 | 0.947208 | 0.014416 |
| MIR570   | 0.683975 | 0.522218 | 0.895834 | 0.005799 |
| MIR558   | 0.877639 | 0.664551 | 1.159054 | 0.357685 |
| MIR128-1 | 0.789212 | 0.633959 | 0.982486 | 0.03417  |
| MIR602   | 0.893498 | 0.74552  | 1.070848 | 0.222845 |
| MIR184   | 4.199172 | 0.577446 | 30.53625 | 0.156341 |
| MIR659   | 1.340181 | 0.992524 | 1.809614 | 0.056006 |
| MIR573   | 0.591741 | 0.458812 | 0.763183 | 5.30E-05 |
| MIR32    | 0.78264  | 0.609383 | 1.005158 | 0.0549   |
| MIR597   | 0.924558 | 0.690874 | 1.237284 | 0.597732 |
| MIR141   | 1.293699 | 0.818923 | 2.043731 | 0.269712 |
| MIR627   | 0.938963 | 0.719235 | 1.225818 | 0.643346 |
| MIR200C  | 1.303844 | 0.951109 | 1.787395 | 0.099248 |
| MIR572   | 0.478332 | 0.230893 | 0.990942 | 0.047206 |
| MIR623   | 0.804055 | 0.647026 | 0.999193 | 0.049155 |
| MIR186   | 0.682891 | 0.51344  | 0.908265 | 0.008762 |
| MIR222   | 0.725162 | 0.589613 | 0.891874 | 0.002336 |
| MIR556   | 1.108163 | 0.860467 | 1.427163 | 0.426214 |
| MIR200B  | 1.03173  | 0.77314  | 1.37681  | 0.831961 |
| MIR657   | 0.899226 | 0.754949 | 1.071076 | 0.233875 |
| MIR181B2 | 1.070469 | 0.916095 | 1.250858 | 0.391427 |
| MIR590   | 0.668083 | 0.497957 | 0.896333 | 0.007149 |
| MIR575   | 0.950369 | 0.778248 | 1.160557 | 0.617534 |
| MIR553   | 0.883867 | 0.685805 | 1.139131 | 0.340262 |
| MIR199A1 | 0.811863 | 0.641538 | 1.027408 | 0.08276  |
| MIR580   | 0.886078 | 0.693488 | 1.132151 | 0.333388 |

|           |          |          |          |          |
|-----------|----------|----------|----------|----------|
| MIR93     | 0.798592 | 0.67242  | 0.948437 | 0.010367 |
| MIR181A1  | 0.854196 | 0.704837 | 1.035205 | 0.108028 |
| MIR617    | 0.682324 | 0.534837 | 0.870481 | 0.002096 |
| MIR626    | 0.747779 | 0.60828  | 0.91927  | 0.005798 |
| MIR586    | 0.908704 | 0.741048 | 1.114291 | 0.35757  |
| MIR551A   | 0.688099 | 0.564623 | 0.838577 | 0.000212 |
| MIR15B    | 1.083338 | 0.78033  | 1.504008 | 0.63251  |
| MIR648    | 0.983811 | 0.811201 | 1.193149 | 0.868299 |
| MIR26A2   | 1.070394 | 0.83324  | 1.375046 | 0.594489 |
| MIR646    | 1.060694 | 0.89189  | 1.261447 | 0.505242 |
| MIR599    | 0.820825 | 0.649476 | 1.037381 | 0.098379 |
| MIR563    | 1.043201 | 0.900053 | 1.209116 | 0.574369 |
| MIR545    | 1.016844 | 0.804864 | 1.284654 | 0.888632 |
| MIR640    | 0.79277  | 0.666522 | 0.942932 | 0.008693 |
| MIR596    | 1.003931 | 0.70762  | 1.42432  | 0.982459 |
| MIR33B    | 0.912802 | 0.696439 | 1.196382 | 0.508627 |
| MIR27B    | 0.998059 | 0.798458 | 1.247557 | 0.986385 |
| MIR221    | 0.834877 | 0.680256 | 1.024644 | 0.084168 |
| MIR610    | 1.152933 | 0.891235 | 1.491475 | 0.278643 |
| MIR302A   | 0.963529 | 0.788225 | 1.177822 | 0.716901 |
| MIR603    | 0.802262 | 0.629216 | 1.022898 | 0.075515 |
| MIR33A    | 1.092676 | 0.889413 | 1.342391 | 0.39868  |
| MIR634    | 0.967478 | 0.778113 | 1.202928 | 0.766086 |
| MIR574    | 0.693645 | 0.484904 | 0.992244 | 0.045221 |
| MIR624    | 0.811833 | 0.66133  | 0.996586 | 0.046299 |
| MIR579    | 0.831538 | 0.661733 | 1.044916 | 0.113432 |
| MIR30C1   | 0.746908 | 0.603221 | 0.924821 | 0.007431 |
| MIR569    | 0.856244 | 0.702522 | 1.043603 | 0.124236 |
| MIR629    | 0.943039 | 0.762875 | 1.165751 | 0.5877   |
| MIR620    | 0.870446 | 0.724867 | 1.045262 | 0.137307 |
| MIR638    | 0.87935  | 0.695091 | 1.112454 | 0.283862 |
| MIR589    | 1.014756 | 0.80462  | 1.27977  | 0.901529 |
| MIR181B1  | 0.753292 | 0.639023 | 0.887994 | 0.000738 |
| MIR607    | 1.262414 | 1.076927 | 1.479849 | 0.004053 |
| MIR613    | 0.860498 | 0.722884 | 1.024311 | 0.091064 |
| MIR576    | 0.738918 | 0.597344 | 0.914047 | 0.005301 |
| MIR182    | 0.858718 | 0.427084 | 1.726584 | 0.669078 |
| MIR601    | 0.871869 | 0.691522 | 1.09925  | 0.246189 |
| MIR301A   | 1.108989 | 0.886832 | 1.386798 | 0.364413 |
| MIR643    | 0.821842 | 0.679226 | 0.994403 | 0.043624 |
| MIR16-1   | 0.900996 | 0.754711 | 1.075636 | 0.248767 |
| MIR130A   | 0.974316 | 0.804855 | 1.179456 | 0.789543 |
| MIRLET7F2 | 0.959696 | 0.702198 | 1.311621 | 0.796332 |
| MIR652    | 0.785734 | 0.615085 | 1.003728 | 0.053584 |
| MIR140    | 0.928002 | 0.735403 | 1.171042 | 0.528965 |
| MIR645    | 1.074769 | 0.822723 | 1.404031 | 0.596924 |
| MIR618    | 0.771047 | 0.625473 | 0.950502 | 0.014872 |
| MIR185    | 1.16113  | 0.92179  | 1.462614 | 0.204626 |
| MIR591    | 0.937733 | 0.748518 | 1.174781 | 0.576092 |
| MIR616    | 1.011497 | 0.785584 | 1.302377 | 0.929366 |
| MIR548A3  | 0.974331 | 0.78864  | 1.203744 | 0.809518 |
| MIR106B   | 0.90217  | 0.749301 | 1.086228 | 0.277117 |
| MIR320A   | 1.015582 | 0.774321 | 1.332015 | 0.911036 |
| SNORD94   | 0.813639 | 0.598705 | 1.105733 | 0.187583 |
| SNORD96I  | 0.899983 | 0.726824 | 1.114395 | 0.333777 |
| SNORA49   | 0.889777 | 0.684103 | 1.157287 | 0.383879 |
| SNORD120  | 0.937088 | 0.69235  | 1.268338 | 0.673938 |
| SNORD83   | 1.103676 | 0.828024 | 1.471093 | 0.501058 |

|          |          |          |          |          |
|----------|----------|----------|----------|----------|
| SNORD101 | 0.870065 | 0.700621 | 1.080488 | 0.207859 |
| SNORD41  | 0.929703 | 0.762953 | 1.132898 | 0.469844 |
| MIR196A1 | 1.0369   | 0.549178 | 1.957767 | 0.911027 |
| GPX3     | 0.82401  | 0.593334 | 1.144369 | 0.248011 |
| GNRHR2   | 1.068059 | 0.46077  | 2.475752 | 0.878001 |
| DIO1     | 1.186347 | 0.762985 | 1.844622 | 0.447992 |
| AKR7L    | 1.388495 | 0.828812 | 2.326121 | 0.21249  |
| STK38L   | 0.765955 | 0.52688  | 1.113511 | 0.162493 |
| SACM1L   | 0.859214 | 0.530864 | 1.390655 | 0.536814 |
| TSN      | 0.843167 | 0.504043 | 1.410455 | 0.515787 |
| MIR454   | 0.933347 | 0.74999  | 1.161531 | 0.53649  |
| MIR760   | 0.969572 | 0.736645 | 1.27615  | 0.825532 |
| MIR766   | 0.935905 | 0.760872 | 1.151204 | 0.530626 |
| MIR769   | 0.960601 | 0.676771 | 1.363465 | 0.822018 |
| MIR765   | 1.029472 | 0.863402 | 1.227484 | 0.746237 |
| SLC48A1  | 1.770055 | 1.169568 | 2.678849 | 0.006917 |
| MIR301B  | 0.729431 | 0.534144 | 0.996117 | 0.047207 |
| PRR22    | 1.123682 | 0.816645 | 1.546157 | 0.473928 |
| TAS2R19  | 0.684518 | 0.51709  | 0.906157 | 0.008084 |
| TAS2R50  | 0.714835 | 0.518847 | 0.984856 | 0.040044 |
| TAS2R14  | 0.642172 | 0.427095 | 0.965559 | 0.033305 |
| TAS2R13  | 0.670518 | 0.502863 | 0.894068 | 0.006475 |
| SNORD67  | 0.797398 | 0.599372 | 1.060849 | 0.120087 |
| SNORD66  | 0.919711 | 0.731914 | 1.155693 | 0.472613 |
| SNORD91  | 0.956792 | 0.697039 | 1.313342 | 0.784614 |
| SNORD17  | 0.926975 | 0.626484 | 1.371597 | 0.704446 |
| SNORD89  | 1.08176  | 0.817883 | 1.430773 | 0.581733 |
| SNORD72  | 1.217623 | 0.91788  | 1.615252 | 0.172049 |
| SNORA74  | 0.91962  | 0.696632 | 1.213984 | 0.554248 |
| SNORA53  | 0.913561 | 0.677737 | 1.231441 | 0.552896 |
| SNORD90  | 0.959331 | 0.771902 | 1.192269 | 0.708139 |
| SNORD69  | 0.8507   | 0.637525 | 1.135157 | 0.27193  |
| SNORA12  | 1.012728 | 0.852159 | 1.203553 | 0.885815 |
| SNORD19  | 0.970742 | 0.757479 | 1.244048 | 0.814504 |
| SNORD70  | 0.924201 | 0.720231 | 1.185936 | 0.535537 |
| SNORD30  | 1.05507  | 0.793401 | 1.403039 | 0.712414 |
| RNF208   | 1.189501 | 0.959392 | 1.4748   | 0.113642 |
| PTTG3P   | 0.804677 | 0.624192 | 1.037349 | 0.093543 |
| ZNF580   | 1.247795 | 0.860306 | 1.809811 | 0.243265 |
| ZNF611   | 0.86304  | 0.555832 | 1.340044 | 0.511746 |
| NUP62    | 2.08633  | 1.109902 | 3.921762 | 0.022385 |
| DENND1B  | 0.425593 | 0.272153 | 0.665545 | 0.000181 |
| SFT2D2   | 0.939434 | 0.608317 | 1.450784 | 0.778116 |
| LPAL2    | 1.195247 | 0.981211 | 1.455973 | 0.076468 |
| ZNF254   | 0.573509 | 0.419219 | 0.784585 | 0.000507 |
| TCTEX1D2 | 0.966381 | 0.617814 | 1.511607 | 0.880906 |
| CRYGS    | 0.960157 | 0.637254 | 1.446679 | 0.845866 |
| CRIP1    | 1.476971 | 1.168512 | 1.866856 | 0.001103 |
| KLHL23   | 0.888713 | 0.72533  | 1.088897 | 0.255    |
| FAM24B   | 0.888028 | 0.723344 | 1.090207 | 0.2565   |
| TRIM59   | 1.282461 | 0.863601 | 1.904474 | 0.217536 |
| MLLT11   | 0.837529 | 0.671217 | 1.045051 | 0.11646  |
| GIMAP1   | 1.256004 | 1.022686 | 1.542551 | 0.029712 |
| DNLZ     | 0.799452 | 0.505135 | 1.265251 | 0.339295 |
| SUPT4H1  | 0.669143 | 0.476839 | 0.938999 | 0.020123 |
| NRAS     | 0.886049 | 0.555507 | 1.413272 | 0.611541 |
| LTC4S    | 0.909563 | 0.759656 | 1.089052 | 0.302266 |
| ANKRD39  | 0.766139 | 0.445599 | 1.317259 | 0.335339 |

|          |          |          |          |          |
|----------|----------|----------|----------|----------|
| QTRT1    | 1.351043 | 0.968173 | 1.885323 | 0.076774 |
| CHUK     | 0.99433  | 0.614169 | 1.609806 | 0.981546 |
| MXD3     | 1.128021 | 0.811843 | 1.567334 | 0.472857 |
| GSTM2    | 0.805296 | 0.645188 | 1.005136 | 0.055535 |
| COG8     | 0.926224 | 0.545409 | 1.572933 | 0.776688 |
| ARHGAP15 | 1.107471 | 0.746919 | 1.642068 | 0.611486 |
| LCAT     | 1.329227 | 0.896151 | 1.971595 | 0.157109 |
| PVRIG    | 0.665621 | 0.439276 | 1.008593 | 0.054907 |
| GPC2     | 0.609529 | 0.446435 | 0.832207 | 0.001833 |
| SIPA1    | 1.690686 | 1.277527 | 2.237462 | 0.00024  |
| SYNJ2BP  | 1.053748 | 0.7397   | 1.50113  | 0.771838 |
| ARL2     | 1.336483 | 0.99178  | 1.800993 | 0.056685 |
| SRA1     | 1.188491 | 0.755277 | 1.870188 | 0.455331 |
| DNAJC9   | 1.55186  | 1.039883 | 2.315904 | 0.031443 |
| VDAC1    | 1.101862 | 0.724313 | 1.676208 | 0.650427 |
| ZBTB9    | 1.22988  | 0.81924  | 1.846351 | 0.3182   |
| HEXA     | 0.997075 | 0.628406 | 1.582032 | 0.990077 |
| NDUFS3   | 1.594842 | 0.881933 | 2.884027 | 0.122517 |
| LEPROT   | 0.76686  | 0.467852 | 1.256966 | 0.292404 |
| LBH      | 0.943347 | 0.732764 | 1.214447 | 0.650905 |
| ADAT3    | 1.219808 | 0.87852  | 1.693678 | 0.235412 |
| PPP1CB   | 1.01658  | 0.639663 | 1.615593 | 0.944535 |
| GPSM3    | 1.60464  | 1.118095 | 2.302907 | 0.010301 |
| LAT      | 0.819965 | 0.472275 | 1.423624 | 0.480705 |
| NCKIPSD  | 1.065997 | 0.742479 | 1.530482 | 0.729085 |
| ATF6B    | 1.24584  | 0.711712 | 2.180822 | 0.441616 |
| S1PR3    | 0.951107 | 0.792459 | 1.141516 | 0.590298 |
| CLIC1    | 2.125621 | 1.310818 | 3.446905 | 0.002233 |
| DDAH2    | 1.074046 | 0.789098 | 1.461891 | 0.649737 |
| RPS29    | 1.297031 | 0.799389 | 2.104468 | 0.292241 |
| UGT2B11  | 0.90248  | 0.806807 | 1.009498 | 0.072713 |
| ATP6V1G2 | 1.053689 | 0.73145  | 1.517891 | 0.778857 |
| ZNF134   | 0.807944 | 0.554351 | 1.177544 | 0.267162 |
| DDX47    | 0.583276 | 0.367523 | 0.925685 | 0.022158 |
| ZNF845   | 0.94151  | 0.654742 | 1.353877 | 0.745026 |
| KLRK1    | 0.87418  | 0.573806 | 1.331794 | 0.531298 |
| EMP2     | 0.997695 | 0.661876 | 1.5039   | 0.991207 |
| KCTD11   | 1.231734 | 0.836585 | 1.813527 | 0.290983 |
| LTB4R    | 1.453293 | 1.137257 | 1.857154 | 0.002808 |
| LTB4R2   | 1.221418 | 0.916013 | 1.628647 | 0.173068 |
| DNASE1   | 0.833022 | 0.557968 | 1.243667 | 0.371592 |
| CSNK1E   | 0.845705 | 0.621373 | 1.151026 | 0.286603 |
| IRF9     | 1.243841 | 0.916092 | 1.688849 | 0.16201  |
| GALT     | 0.991153 | 0.656064 | 1.497392 | 0.966332 |
| HBG1     | 0.728802 | 0.489886 | 1.084239 | 0.118546 |
| CLDN9    | 0.857234 | 0.715997 | 1.026331 | 0.093539 |
| KRT18P17 | 0.873182 | 0.10976  | 6.946477 | 0.898019 |
| NUDT19   | 1.144446 | 0.781982 | 1.67492  | 0.487462 |
| TAX1BP3  | 0.571408 | 0.247776 | 1.317754 | 0.189272 |
| AP1G2    | 1.388179 | 0.943003 | 2.043515 | 0.096413 |
| ZNF90    | 0.951654 | 0.791637 | 1.144017 | 0.597806 |
| MEF2B    | 0.703996 | 0.339555 | 1.459585 | 0.345443 |
| GANC     | 0.789261 | 0.552789 | 1.126891 | 0.192751 |
| TTLL3    | 1.006329 | 0.638344 | 1.586446 | 0.978327 |
| REPIN1   | 0.901895 | 0.603856 | 1.347034 | 0.613922 |
| MRPL23   | 1.443958 | 0.992404 | 2.100972 | 0.054843 |
| UCA1     | 0.643831 | 0.446166 | 0.929067 | 0.018614 |
| TSPAN4   | 1.189547 | 0.903997 | 1.565295 | 0.215226 |

|          |          |          |          |          |
|----------|----------|----------|----------|----------|
| CPNE1    | 0.994047 | 0.648808 | 1.522993 | 0.978118 |
| ARL16    | 1.029137 | 0.677668 | 1.562894 | 0.892827 |
| LYRM4    | 1.168918 | 0.653009 | 2.092421 | 0.599307 |
| MYCBP    | 1.589434 | 0.941883 | 2.682183 | 0.082619 |
| PRCD     | 1.108989 | 0.812959 | 1.512815 | 0.513788 |
| ALG3     | 1.156252 | 0.708903 | 1.885896 | 0.560803 |
| FIS1     | 1.167206 | 0.77818  | 1.750714 | 0.454775 |
| MBLAC1   | 0.924194 | 0.534968 | 1.59661  | 0.777472 |
| NEURL1B  | 1.120431 | 0.955751 | 1.313486 | 0.160921 |
| PLIN5    | 1.209984 | 0.826244 | 1.771948 | 0.327422 |
| HIGD1C   | 0.907751 | 0.674755 | 1.221202 | 0.522485 |
| PPME1    | 1.098037 | 0.667181 | 1.807133 | 0.712934 |
| STARD10  | 1.260862 | 0.962572 | 1.651588 | 0.092377 |
| MEG3     | 0.849683 | 0.755403 | 0.955731 | 0.006637 |
| IFRD2    | 1.116674 | 0.799037 | 1.560581 | 0.518137 |
| CAPN14   | 0.88785  | 0.664761 | 1.185807 | 0.420432 |
| ZBED1    | 1.304663 | 0.884481 | 1.924457 | 0.179923 |
| HNRNPUL  | 1.628538 | 0.91174  | 2.908872 | 0.099401 |
| POLR2J4  | 0.628649 | 0.3347   | 1.180758 | 0.14893  |
| MTCP1    | 1.439901 | 0.782244 | 2.650473 | 0.241565 |
| SMTNL1   | 0.932042 | 0.728091 | 1.193123 | 0.576461 |
| ZSWIM7   | 0.751335 | 0.466197 | 1.210872 | 0.240331 |
| LRRC69   | 0.967186 | 0.618063 | 1.513518 | 0.883897 |
| PHB2     | 1.526503 | 0.920793 | 2.530658 | 0.101003 |
| NEURL4   | 1.085464 | 0.754595 | 1.56141  | 0.658432 |
| UBXN2B   | 1.200858 | 0.802344 | 1.797309 | 0.373667 |
| CBWD6    | 0.462334 | 0.241922 | 0.883562 | 0.019565 |
| FAM166B  | 1.166345 | 0.826954 | 1.645026 | 0.380477 |
| PEX26    | 1.024635 | 0.526243 | 1.995042 | 0.942933 |
| FASTKD5  | 1.212117 | 0.794198 | 1.849951 | 0.372513 |
| GOLGA8B  | 1.091827 | 0.938656 | 1.269991 | 0.254653 |
| HOMEZ    | 1.039731 | 0.649744 | 1.663797 | 0.870967 |
| DDX3X    | 0.740997 | 0.523009 | 1.049842 | 0.091732 |
| VPS16    | 1.508002 | 0.974455 | 2.333685 | 0.06521  |
| MYL5     | 1.350257 | 0.96387  | 1.891535 | 0.08081  |
| ZNF407   | 0.840419 | 0.564743 | 1.250666 | 0.391355 |
| NPEPL1   | 1.610496 | 1.14703  | 2.261229 | 0.00592  |
| SIAH3    | 0.781693 | 0.378274 | 1.615348 | 0.506015 |
| GCGR     | 0.433171 | 0.210468 | 0.89152  | 0.023101 |
| CELA2B   | 0.774341 | 0.447903 | 1.338691 | 0.359862 |
| TMEM167I | 1.148506 | 0.695401 | 1.896842 | 0.588583 |
| FAM72D   | 1.173507 | 0.764689 | 1.800886 | 0.464047 |
| TNFRSF25 | 1.068034 | 0.882202 | 1.293012 | 0.499756 |
| ZC3H11B  | 1.016297 | 0.299248 | 3.451511 | 0.979326 |
| TSTD1    | 1.211344 | 0.893737 | 1.641818 | 0.216521 |
| PDZK1P1  | 0.957139 | 0.681816 | 1.343641 | 0.800167 |
| CYB5RL   | 1.016107 | 0.669866 | 1.541313 | 0.940083 |
| TTC34    | 0.969374 | 0.762204 | 1.232855 | 0.799841 |
| MMP23A   | 1.458805 | 0.945433 | 2.250937 | 0.087933 |
| ATAD3C   | 1.473965 | 0.930884 | 2.333882 | 0.098021 |
| MIR942   | 0.774462 | 0.607976 | 0.986538 | 0.038479 |
| MIR933   | 0.867855 | 0.712033 | 1.057777 | 0.160415 |
| MIR874   | 1.000236 | 0.771299 | 1.297125 | 0.998583 |
| MIR938   | 0.82431  | 0.676808 | 1.003957 | 0.054769 |
| MIR875   | 0.979893 | 0.80702  | 1.189797 | 0.837486 |
| MIR920   | 0.888988 | 0.629573 | 1.255296 | 0.50387  |
| IFI30    | 1.223675 | 1.049868 | 1.426256 | 0.009807 |
| CCDC7    | 0.721668 | 0.456741 | 1.140263 | 0.162239 |



|           |          |          |          |          |
|-----------|----------|----------|----------|----------|
| FNIP1     | 0.47545  | 0.310117 | 0.728926 | 0.000649 |
| CKLF      | 1.187861 | 0.899645 | 1.568411 | 0.224701 |
| RPS10P3   | 1.0734   | 0.76061  | 1.514821 | 0.686933 |
| ZNF579    | 1.024091 | 0.75433  | 1.390325 | 0.878704 |
| RNASEK    | 1.15391  | 0.784317 | 1.697666 | 0.467404 |
| NBPF1     | 0.667767 | 0.455161 | 0.979682 | 0.038929 |
| LINGO3    | 1.003535 | 0.793707 | 1.268836 | 0.976475 |
| VAMP2     | 1.288803 | 0.878051 | 1.891704 | 0.195055 |
| MIR1250   | 0.819349 | 0.68026  | 0.986876 | 0.035804 |
| MIR1272   | 0.97652  | 0.80106  | 1.190411 | 0.81411  |
| MIR1286   | 0.846817 | 0.722271 | 0.992839 | 0.04051  |
| MIR1296   | 0.9389   | 0.762619 | 1.155928 | 0.552361 |
| SNORD11   | 0.895002 | 0.712569 | 1.124141 | 0.340185 |
| MIR1302-5 | 0.922264 | 0.751372 | 1.132025 | 0.438961 |
| SNORA11f  | 0.964239 | 0.778453 | 1.194365 | 0.738773 |
| MIR548E   | 0.79133  | 0.661334 | 0.946879 | 0.010585 |
| MIR548L   | 0.798904 | 0.61251  | 1.042019 | 0.097659 |
| MIR548P   | 0.757508 | 0.622289 | 0.92211  | 0.005636 |
| MIR1284   | 0.811604 | 0.652732 | 1.009145 | 0.060373 |
| MIR1255A  | 0.705504 | 0.550818 | 0.903629 | 0.005737 |
| MIR1302-8 | 0.929594 | 0.769584 | 1.122874 | 0.44875  |
| MIR548I2  | 0.94245  | 0.806519 | 1.101293 | 0.455759 |
| MIR663B   | 0.632461 | 0.256556 | 1.559139 | 0.319643 |
| SNORA79   | 1.027876 | 0.760118 | 1.389954 | 0.858275 |
| MIR1200   | 0.896875 | 0.758975 | 1.059829 | 0.201328 |
| MIR548Q   | 1.048909 | 0.896991 | 1.226557 | 0.549727 |
| MIR548K   | 0.717767 | 0.580885 | 0.886906 | 0.002129 |
| MIR1288   | 0.880375 | 0.749315 | 1.034359 | 0.121334 |
| MIR320B2  | 1.048326 | 0.727169 | 1.511322 | 0.800365 |
| MIR1301   | 0.826379 | 0.672431 | 1.015573 | 0.069824 |
| MIR1202   | 1.107172 | 0.97935  | 1.251677 | 0.103825 |
| MIR1277   | 1.033552 | 0.844736 | 1.264572 | 0.748491 |
| MIR1271   | 0.91501  | 0.744887 | 1.123987 | 0.39739  |
| MIR1827   | 0.982277 | 0.809032 | 1.192622 | 0.856663 |
| MIR320C1  | 0.759142 | 0.605509 | 0.951757 | 0.016915 |
| SNORD10f  | 0.978123 | 0.705928 | 1.355273 | 0.894243 |
| MIR548O   | 0.638256 | 0.506832 | 0.803759 | 0.000135 |
| SNORD11g  | 0.919114 | 0.751402 | 1.124259 | 0.411909 |
| MIR548H1  | 0.992159 | 0.76142  | 1.292822 | 0.953521 |
| SNORD99   | 1.16192  | 0.887864 | 1.520568 | 0.274214 |
| MIR1180   | 1.156866 | 0.879888 | 1.521032 | 0.296691 |
| MIR1255B  | 0.992508 | 0.808493 | 1.218405 | 0.942701 |
| MIR1249   | 1.097109 | 0.916272 | 1.313637 | 0.313227 |
| MIR1276   | 0.837141 | 0.673424 | 1.040661 | 0.109377 |
| SNORA77   | 1.002066 | 0.767338 | 1.308597 | 0.987905 |
| MIR1290   | 0.807781 | 0.668049 | 0.97674  | 0.027607 |
| MIR548N   | 0.821362 | 0.669698 | 1.007371 | 0.058832 |
| RNU6ATA1  | 1.073333 | 0.872553 | 1.320315 | 0.503021 |
| MIR1278   | 0.723139 | 0.595353 | 0.878354 | 0.001086 |
| SNORA11   | 0.757996 | 0.599138 | 0.958974 | 0.020939 |
| MIR1203   | 1.004936 | 0.845997 | 1.193735 | 0.955298 |
| SNORD93   | 0.951009 | 0.815162 | 1.109495 | 0.522997 |
| MIR548J   | 0.963975 | 0.770549 | 1.205954 | 0.748143 |
| MIR1289-1 | 1.398065 | 1.023388 | 1.909916 | 0.035273 |
| MIR1205   | 0.88029  | 0.741191 | 1.045495 | 0.146231 |
| MIR548F2  | 1.02E-07 | 0        | Inf      | 0.994833 |
| MIR1183   | 0.915442 | 0.722196 | 1.160399 | 0.465216 |
| MIR1256   | 0.829706 | 0.673048 | 1.022826 | 0.080365 |

|          |          |          |          |          |
|----------|----------|----------|----------|----------|
| PPP3R1   | 1.524476 | 0.834173 | 2.786023 | 0.170501 |
| FANCG    | 1.289108 | 0.673075 | 2.468968 | 0.443722 |
| AP4M1    | 0.662411 | 0.40376  | 1.086756 | 0.102978 |
| TAS2R41  | 0.994997 | 0.821604 | 1.204983 | 0.959055 |
| PLXNA4   | 1.224961 | 0.966149 | 1.553104 | 0.093819 |
| CEBPD    | 0.990655 | 0.866075 | 1.133155 | 0.891085 |
| OR3A2    | 1.06346  | 0.832341 | 1.358753 | 0.622628 |
| NPTXR    | 0.948416 | 0.762632 | 1.179458 | 0.633985 |
| PPP2R2A  | 0.941357 | 0.486946 | 1.819815 | 0.857395 |
| TRIM16   | 1.305594 | 0.976354 | 1.745858 | 0.072088 |
| TIGD1    | 0.937965 | 0.577355 | 1.52381  | 0.795891 |
| FXD7     | 1.204159 | 0.802877 | 1.806003 | 0.369009 |
| SLC12A8  | 1.51453  | 0.994547 | 2.306378 | 0.053054 |
| KIR2DS4  | 1.343689 | 0.99757  | 1.809897 | 0.051901 |
| APOL6    | 1.440671 | 1.056676 | 1.96421  | 0.02097  |
| FADS3    | 1.177377 | 0.938252 | 1.477447 | 0.158626 |
| CCNL2    | 1.158917 | 0.769109 | 1.746292 | 0.480794 |
| UBA52    | 1.536085 | 0.935486 | 2.52228  | 0.08981  |
| MYBPHL   | 2.108794 | 1.488125 | 2.988332 | 2.73E-05 |
| PPT2     | 0.831641 | 0.635125 | 1.088961 | 0.180134 |
| ZNF630   | 0.451994 | 0.272934 | 0.748527 | 0.002033 |
| TIAF1    | 0.970686 | 0.725314 | 1.299067 | 0.841391 |
| DCDC2B   | 0.940171 | 0.611324 | 1.445912 | 0.778772 |
| MIR1915  | 1.283826 | 1.113658 | 1.479996 | 0.000574 |
| SNORD121 | 0.925611 | 0.759004 | 1.128789 | 0.445184 |
| SNORA361 | 1.27149  | 0.884339 | 1.828131 | 0.194805 |
| MIR1537  | 0.792151 | 0.672568 | 0.932997 | 0.005261 |
| MIR1913  | 0.941098 | 0.751602 | 1.178369 | 0.596663 |
| SNORD71  | 0.762665 | 0.60891  | 0.955244 | 0.018346 |
| EXOSC6   | 1.071646 | 0.609349 | 1.884678 | 0.810155 |
| VPS52    | 1.111237 | 0.648941 | 1.902867 | 0.700736 |
| RPL23AP5 | 0.790988 | 0.536225 | 1.166791 | 0.237126 |
| CDRT15   | 1.08235  | 0.784236 | 1.493787 | 0.630224 |
| ZNF844   | 0.777818 | 0.497485 | 1.216117 | 0.270506 |
| HBD      | 0.958193 | 0.864203 | 1.062405 | 0.417516 |
| RFPL4A   | 0.871791 | 0.599896 | 1.266918 | 0.471875 |
| HLA-DPB1 | 1.222264 | 1.062571 | 1.405956 | 0.004961 |
| OR2L1P   | 0.98202  | 0.796117 | 1.211333 | 0.865445 |
| ATXN1L   | 0.911721 | 0.565877 | 1.468934 | 0.704105 |
| HLA-DPB2 | 1.247329 | 1.029365 | 1.511447 | 0.024114 |
| TMEM1831 | 1.479871 | 0.837844 | 2.613874 | 0.176886 |
| SRP14P1  | 1.093766 | 0.663631 | 1.802695 | 0.725157 |
| INE1     | 0.820709 | 0.545943 | 1.233762 | 0.342124 |
| BRI3P1   | 0.976963 | 0.655835 | 1.455331 | 0.908749 |
| PLEKHM1  | 1.353319 | 0.886245 | 2.066553 | 0.161261 |
| HSPA7    | 1.114696 | 0.995736 | 1.247868 | 0.059328 |
| ZNF469   | 0.851307 | 0.641524 | 1.129692 | 0.264766 |
| SLC26A6  | 1.157062 | 0.889639 | 1.504873 | 0.276637 |
| DHRS4L1  | 0.642726 | 0.371663 | 1.11148  | 0.113704 |
| MIAT     | 0.949454 | 0.735025 | 1.226438 | 0.691269 |
| ERCC6    | 0.967883 | 0.623408 | 1.502706 | 0.884364 |
| NOL7     | 1.252738 | 0.646865 | 2.426089 | 0.50401  |
| GTF2H2B  | 0.993157 | 0.695905 | 1.417379 | 0.969816 |
| TMEM191  | 0.839708 | 0.438704 | 1.607254 | 0.59791  |
| NPY6R    | 1.429876 | 0.971315 | 2.104925 | 0.069917 |
| TMEM1851 | 1.220352 | 0.787596 | 1.890892 | 0.372772 |
| SMCR5    | 0.777128 | 0.552679 | 1.092727 | 0.147053 |
| TAS2R46  | 0.74734  | 0.568929 | 0.981698 | 0.036377 |

|          |          |          |          |          |
|----------|----------|----------|----------|----------|
| SRRM5    | 0.990215 | 0.575408 | 1.704055 | 0.971679 |
| FAM30A   | 1.187272 | 1.059434 | 1.330537 | 0.003145 |
| PGAM4    | 1.220728 | 0.658321 | 2.263605 | 0.526706 |
| HNRNPA3  | 0.338385 | 0.156627 | 0.731063 | 0.005833 |
| LTA      | 1.202878 | 0.850658 | 1.700936 | 0.296041 |
| WDR46    | 1.184075 | 0.698377 | 2.00756  | 0.530498 |
| ZNF717   | 0.946425 | 0.72121  | 1.241968 | 0.691276 |
| PARG     | 0.825842 | 0.50429  | 1.352426 | 0.447046 |
| SCAMP4   | 1.142593 | 0.795015 | 1.642132 | 0.471315 |
| LTB      | 1.228456 | 0.991143 | 1.522588 | 0.060281 |
| POLR2J2  | 0.817875 | 0.561607 | 1.19108  | 0.294525 |
| PPIAP19  | 1.121276 | 0.89678  | 1.401972 | 0.315279 |
| ORM2     | 1.096937 | 0.815215 | 1.476017 | 0.541244 |
| LYPLA2P1 | 2.91578  | 1.38859  | 6.122591 | 0.004694 |
| CCT6P1   | 0.665078 | 0.411742 | 1.074288 | 0.095501 |
| ARL17B   | 0.96013  | 0.797794 | 1.155498 | 0.666801 |
| DHFR     | 1.149339 | 0.83589  | 1.580329 | 0.391629 |
| RPL41    | 1.272784 | 0.815104 | 1.987451 | 0.288766 |
| CCDC26   | 1.091555 | 0.855284 | 1.393094 | 0.481495 |
| TTY10    | 0.975681 | 0.80632  | 1.180614 | 0.800192 |
| ORM1     | 1.082787 | 0.86913  | 1.348966 | 0.478174 |
| HLA-DRB1 | 1.170002 | 1.043896 | 1.311343 | 0.00697  |
| SPINK8   | 0.694975 | 0.519815 | 0.92916  | 0.014055 |
| PATL2    | 1.118007 | 0.792166 | 1.577876 | 0.525708 |
| ZNF492   | 0.677104 | 0.456679 | 1.00392  | 0.05232  |
| XIST     | 0.99508  | 0.938202 | 1.055407 | 0.869551 |
| ZNF688   | 1.507266 | 0.905925 | 2.50777  | 0.114198 |
| EMX2OS   | 1.0648   | 0.611071 | 1.85543  | 0.824625 |
| HBBP1    | 1.105527 | 0.88674  | 1.378296 | 0.37259  |
| ACBD6    | 0.86502  | 0.525882 | 1.422866 | 0.567964 |
| HERC2P4  | 0.924824 | 0.678748 | 1.260113 | 0.620499 |
| DSCR9    | 1.409671 | 0.914825 | 2.172189 | 0.119606 |
| ANKRD18F | 0.959894 | 0.844801 | 1.090666 | 0.529914 |
| PA2G4P4  | 0.943321 | 0.645382 | 1.378803 | 0.763189 |
| PRB4     | 0.935761 | 0.722917 | 1.211271 | 0.614078 |
| YY2      | 0.60783  | 0.336025 | 1.099494 | 0.099699 |
| HSBP1    | 1.270762 | 0.773666 | 2.087251 | 0.343938 |
| HCG18    | 0.80419  | 0.603165 | 1.072213 | 0.137579 |
| HLA-DPA1 | 1.219685 | 1.068778 | 1.391899 | 0.003208 |
| RPS18    | 1.101406 | 0.764429 | 1.586929 | 0.604215 |
| SNORD62I | 0.742242 | 0.537583 | 1.024816 | 0.070136 |
| DLEU2    | 0.79924  | 0.564884 | 1.130824 | 0.205654 |
| PRH1     | 0.743342 | 0.529169 | 1.044197 | 0.087165 |
| TAPBP    | 2.063805 | 1.129826 | 3.769868 | 0.018421 |
| ANXA2P2  | 1.075873 | 0.914939 | 1.265114 | 0.376355 |
| MCTS1    | 0.743512 | 0.424792 | 1.301369 | 0.299423 |
| DYTN     | 0.933458 | 0.793536 | 1.098054 | 0.405945 |
| HLA-DQB1 | 1.176696 | 1.030341 | 1.34384  | 0.016349 |
| TNF      | 0.901973 | 0.782391 | 1.039832 | 0.155108 |
| SNHG7    | 1.115339 | 0.821524 | 1.514236 | 0.48409  |
| RAB1C    | 1.255639 | 0.688685 | 2.289332 | 0.457565 |
| GPX1     | 1.562369 | 1.202177 | 2.030481 | 0.000847 |
| KRT8P15  | 0.947025 | 0.675644 | 1.327411 | 0.752049 |
| MYCNOS   | 0.816141 | 0.566719 | 1.175338 | 0.274926 |
| RPS28    | 1.302614 | 0.937334 | 1.810245 | 0.115364 |
| UQCRHL   | 0.998045 | 0.590789 | 1.68604  | 0.994163 |
| NUDT9P1  | 1.214622 | 0.887824 | 1.661712 | 0.224022 |
| TRIM26   | 1.753748 | 1.089309 | 2.823472 | 0.020776 |

|          |          |          |          |          |
|----------|----------|----------|----------|----------|
| FAM133B  | 0.548096 | 0.354377 | 0.847712 | 0.006882 |
| JRK      | 0.907358 | 0.660298 | 1.246859 | 0.548849 |
| GAS5     | 1.085195 | 0.787043 | 1.496294 | 0.617886 |
| HLA-B    | 1.243027 | 0.92471  | 1.67092  | 0.149483 |
| MORF4    | 1.234958 | 0.585599 | 2.604378 | 0.579346 |
| MIR155HC | 1.279471 | 1.059557 | 1.545029 | 0.010432 |
| APOC2    | 0.930575 | 0.556751 | 1.555399 | 0.783672 |
| SUMO1P3  | 0.84438  | 0.547312 | 1.30269  | 0.444489 |
| PPP1R3E  | 0.889476 | 0.613938 | 1.288677 | 0.535794 |
| SNORA71H | 0.72914  | 0.519714 | 1.022955 | 0.067462 |
| NFAM1    | 1.016571 | 0.914767 | 1.129705 | 0.760164 |
| CYCSP52  | 0.820016 | 0.593457 | 1.133066 | 0.229074 |
| KIAA0040 | 1.371266 | 1.007977 | 1.865489 | 0.044372 |
| IFITM4P  | 1.242545 | 0.959082 | 1.609788 | 0.100231 |
| B3GALT4  | 1.357008 | 0.890908 | 2.066958 | 0.155047 |
| EGOT     | 1.039616 | 0.818711 | 1.320126 | 0.749898 |
| PNMA6A   | 0.991524 | 0.713938 | 1.377036 | 0.959487 |
| ZBTB22   | 0.950068 | 0.598892 | 1.507167 | 0.827775 |
| CLEC2L   | 0.960497 | 0.698522 | 1.320722 | 0.804106 |
| ZBED5    | 0.637219 | 0.38325  | 1.059485 | 0.08235  |
| SLFN14   | 0.9948   | 0.756817 | 1.307617 | 0.970188 |
| BCYRN1   | 1.058071 | 0.936977 | 1.194815 | 0.362693 |
| B3GNT9   | 0.992492 | 0.668244 | 1.474073 | 0.970214 |
| CDKN2AIP | 1.042517 | 0.57581  | 1.887501 | 0.890653 |
| CECR7    | 0.907746 | 0.704678 | 1.169331 | 0.453755 |
| RGL2     | 1.30784  | 0.856145 | 1.997846 | 0.214425 |
| ID2B     | 0.702559 | 0.387756 | 1.272936 | 0.244361 |
| HLA-DQA  | 1.072131 | 0.969852 | 1.185198 | 0.173343 |
| PYY2     | 1.616723 | 1.110414 | 2.353889 | 0.012197 |
| KIFC1    | 0.971634 | 0.742335 | 1.271761 | 0.834038 |
| IRGM     | 0.97922  | 0.79085  | 1.212457 | 0.84724  |
| PTENP1   | 0.818455 | 0.50854  | 1.31724  | 0.409306 |
| LRRC37A2 | 0.844938 | 0.601618 | 1.186666 | 0.330892 |
| OR2W3    | 0.980957 | 0.808496 | 1.190206 | 0.845476 |
| PAGE2B   | 0.944918 | 0.52886  | 1.688294 | 0.848264 |
| SNORD12  | 1.039345 | 0.816393 | 1.323185 | 0.754082 |
| SNORD11  | 0.7698   | 0.571204 | 1.037443 | 0.085704 |
| SNORD12  | 1.007851 | 0.813169 | 1.249144 | 0.943067 |
| SNORA13  | 0.843958 | 0.650104 | 1.095619 | 0.202617 |
| SNORD42  | 0.893536 | 0.699377 | 1.141598 | 0.367833 |
| MIR1976  | 0.93872  | 0.686676 | 1.283275 | 0.69179  |
| SCARNA7  | 0.897393 | 0.762931 | 1.055554 | 0.191157 |
| SNORD12  | 0.938356 | 0.686338 | 1.282914 | 0.690099 |
| SCARNA18 | 1.011374 | 0.822136 | 1.24417  | 0.914786 |
| SNORD12  | 0.705114 | 0.54549  | 0.911448 | 0.007631 |
| SNORA47  | 0.788687 | 0.656003 | 0.948208 | 0.011543 |
| SNORD13  | 1.019591 | 0.866241 | 1.20009  | 0.815525 |
| SNORD12  | 0.760579 | 0.62917  | 0.919434 | 0.004685 |
| SNORA59  | 0.882137 | 0.682418 | 1.140306 | 0.338314 |
| SNORA84  | 0.704657 | 0.52095  | 0.953145 | 0.023126 |
| TXNDC5   | 0.656608 | 0.451165 | 0.955603 | 0.02801  |
| RNF103   | 0.763383 | 0.452554 | 1.287698 | 0.311487 |
| RBM14    | 0.675674 | 0.437935 | 1.042475 | 0.076402 |
| ALKBH6   | 0.93001  | 0.526157 | 1.643842 | 0.802837 |
| ASB14    | 0.75516  | 0.453639 | 1.257094 | 0.280134 |
| NME1     | 1.50968  | 1.025115 | 2.223296 | 0.037019 |
| TNFSF12  | 1.185103 | 0.986962 | 1.423023 | 0.068855 |
| CDRT4    | 0.826798 | 0.622367 | 1.098377 | 0.189366 |

|           |          |          |          |          |
|-----------|----------|----------|----------|----------|
| APOBEC3C  | 1.642443 | 1.084885 | 2.486548 | 0.019026 |
| WBP1      | 1.296573 | 0.877661 | 1.915435 | 0.192055 |
| MRPS17    | 0.992731 | 0.566661 | 1.739162 | 0.979656 |
| DEFA3     | 1.034076 | 0.944646 | 1.131972 | 0.467803 |
| ADSL      | 0.727769 | 0.384659 | 1.376927 | 0.328677 |
| LILRA4    | 1.177049 | 1.021468 | 1.356326 | 0.02422  |
| LILRA2    | 1.226695 | 1.041463 | 1.444873 | 0.01443  |
| AMY2B     | 1.033999 | 0.755111 | 1.415888 | 0.834859 |
| LY6G5B    | 0.952793 | 0.610622 | 1.486703 | 0.831306 |
| PSMB9     | 1.418313 | 1.061635 | 1.894823 | 0.018046 |
| PCDHGC3   | 0.941568 | 0.771082 | 1.14975  | 0.554681 |
| COX19     | 0.908911 | 0.553188 | 1.493381 | 0.706185 |
| DEFA1B    | 0.142394 | 0.002222 | 9.126003 | 0.358475 |
| GHRLOS    | 0.598615 | 0.407747 | 0.87883  | 0.008812 |
| ACAD11    | 0.58019  | 0.289654 | 1.162149 | 0.124542 |
| PPIL3     | 0.712487 | 0.424429 | 1.196048 | 0.199627 |
| RPL23AP7  | 0.845571 | 0.563866 | 1.268013 | 0.417141 |
| KIR3DL2   | 1.622307 | 1.168556 | 2.25225  | 0.003846 |
| RPL29P2   | 1.229526 | 0.730141 | 2.070467 | 0.437097 |
| TNFRSF13  | 1.289725 | 0.821091 | 2.02583  | 0.26944  |
| AQP1      | 0.949245 | 0.793702 | 1.135269 | 0.568352 |
| ISY1      | 2.121192 | 0.972517 | 4.626607 | 0.058768 |
| PCDHGC5   | 0.868726 | 0.617154 | 1.222847 | 0.419836 |
| RDH14     | 1.39541  | 0.81146  | 2.399587 | 0.228349 |
| PLCXD2    | 0.931551 | 0.665141 | 1.304667 | 0.679933 |
| NSUN6     | 0.852718 | 0.562454 | 1.292778 | 0.452988 |
| HLA-DOB   | 1.340033 | 1.039078 | 1.728155 | 0.024112 |
| KRTAP5-8  | 0.907655 | 0.607673 | 1.355724 | 0.635995 |
| CRCP      | 0.752393 | 0.449477 | 1.259454 | 0.279095 |
| RPL36A    | 1.295021 | 0.815283 | 2.057053 | 0.273521 |
| PDXP      | 1.307805 | 0.883553 | 1.935768 | 0.179855 |
| RPP21     | 0.924166 | 0.49082  | 1.740115 | 0.807032 |
| CD302     | 1.03077  | 0.801622 | 1.325421 | 0.813241 |
| EGFL8     | 0.791787 | 0.539131 | 1.162847 | 0.23382  |
| ARHGAP8   | 1.135608 | 0.465138 | 2.772523 | 0.780062 |
| ARPC4     | 1.954094 | 1.301672 | 2.933523 | 0.00123  |
| CORT      | 0.893573 | 0.633052 | 1.261307 | 0.522255 |
| ARPC1A    | 1.285035 | 0.791242 | 2.086989 | 0.310774 |
| SUMO1P1   | 0.761293 | 0.581659 | 0.996404 | 0.047012 |
| PLEKHO2   | 1.421453 | 1.047294 | 1.929285 | 0.024042 |
| PISD      | 1.079893 | 0.686519 | 1.698671 | 0.739461 |
| PWP2      | 1.32827  | 0.923675 | 1.910089 | 0.12562  |
| PI4KA     | 1.21881  | 0.822781 | 1.80546  | 0.323647 |
| AMACR     | 0.813793 | 0.292791 | 2.26188  | 0.692798 |
| SNHG3     | 1.636832 | 1.202    | 2.228968 | 0.001761 |
| ARFGAP3   | 0.845995 | 0.544793 | 1.313724 | 0.456398 |
| BGLAP     | 0.829227 | 0.570417 | 1.205466 | 0.326585 |
| PEG10     | 1.061966 | 0.828517 | 1.361194 | 0.635008 |
| AK2P2     | 1.008623 | 0.717113 | 1.418633 | 0.960655 |
| EIF6      | 1.856239 | 1.20184  | 2.866958 | 0.005288 |
| PCDHGC4   | 0.897656 | 0.655506 | 1.22926  | 0.500876 |
| MRPL20    | 1.78217  | 0.974117 | 3.260519 | 0.06081  |
| SERPINB1C | 1.003002 | 0.881957 | 1.140661 | 0.96356  |
| HLA-DMB   | 1.189757 | 1.030321 | 1.373865 | 0.017939 |
| DECR2     | 1.029572 | 0.69525  | 1.524659 | 0.884332 |
| CNTF      | 0.958079 | 0.632145 | 1.452067 | 0.840029 |
| ZNF702P   | 0.974436 | 0.742869 | 1.278186 | 0.851612 |
| ZNF709    | 0.614972 | 0.334268 | 1.131401 | 0.11804  |

|          |          |          |          |          |
|----------|----------|----------|----------|----------|
| EIF4EBP3 | 0.869936 | 0.562111 | 1.346333 | 0.531757 |
| ABCC13   | 0.699827 | 0.405729 | 1.207105 | 0.199408 |
| MRPL33   | 1.061683 | 0.783482 | 1.438668 | 0.699438 |
| MICAL3   | 0.904865 | 0.678588 | 1.206593 | 0.495946 |
| STON1    | 0.901025 | 0.642888 | 1.262813 | 0.54509  |
| PRAF2    | 1.309131 | 0.789128 | 2.171796 | 0.29696  |
| KCTD7    | 1.137789 | 0.900519 | 1.437576 | 0.279334 |
| EFNA4    | 1.32595  | 0.946179 | 1.85815  | 0.101289 |
| INGX     | 1.607564 | 0.819171 | 3.154727 | 0.167558 |
| AOX2P    | 0.990068 | 0.882922 | 1.110217 | 0.864382 |
| UPK3B    | 0.875963 | 0.581446 | 1.31966  | 0.526488 |
| IL10RB   | 0.871494 | 0.562576 | 1.350043 | 0.537934 |
| CFB      | 1.690334 | 1.027999 | 2.779409 | 0.038565 |
| ZNF487   | 1.254919 | 0.807727 | 1.949695 | 0.312449 |
| WDR92    | 0.923759 | 0.517263 | 1.649704 | 0.788673 |
| NME2     | 0.798152 | 0.473639 | 1.345002 | 0.397125 |
| PLA2G4B  | 0.696865 | 0.390073 | 1.244948 | 0.222495 |
| TTC4     | 0.853066 | 0.367842 | 1.978354 | 0.711173 |
| RPLPOP2  | 1.084447 | 0.598744 | 1.964152 | 0.789082 |
| JMJD7    | 0.659841 | 0.44021  | 0.989052 | 0.044086 |
| APOBEC3I | 1.600244 | 0.916326 | 2.794617 | 0.098376 |
| RPL12P6  | 0.830137 | 0.499092 | 1.380762 | 0.473293 |
| MRPS6    | 0.829055 | 0.511556 | 1.34361  | 0.446657 |
| ZNF512   | 0.767813 | 0.490415 | 1.202116 | 0.248033 |
| NFS1     | 1.949387 | 0.99101  | 3.834582 | 0.053138 |
| DDOST    | 0.887253 | 0.584972 | 1.345736 | 0.573543 |
| TMEM199  | 1.133746 | 0.543802 | 2.363692 | 0.737722 |
| P2RY11   | 0.995173 | 0.717313 | 1.380664 | 0.976891 |
| TMEM141  | 1.386445 | 0.841493 | 2.284309 | 0.199649 |
| DBNDD2   | 0.628076 | 0.265699 | 1.484688 | 0.28933  |
| ETV5     | 0.940523 | 0.761296 | 1.161942 | 0.569708 |
| KRTAP5-7 | 0.880102 | 0.587119 | 1.319288 | 0.536331 |
| RBM12    | 0.892576 | 0.532051 | 1.497399 | 0.66682  |
| LILRA6   | 1.140385 | 1.028492 | 1.264452 | 0.012662 |
| SCARF2   | 1.312648 | 0.897108 | 1.920665 | 0.161258 |
| APOBEC3C | 2.628644 | 1.598832 | 4.321761 | 0.000139 |
| KRT18P34 | 1.01596  | 0.601628 | 1.715636 | 0.952768 |
| ASPRV1   | 1.150447 | 0.821407 | 1.611293 | 0.414857 |
| FCGR2C   | 1.08375  | 0.967314 | 1.214201 | 0.165473 |
| UBE2V1   | 0.74187  | 0.476313 | 1.155481 | 0.186594 |
| HBB      | 0.936966 | 0.865627 | 1.014184 | 0.107097 |
| N4BP2L2  | 0.570126 | 0.352972 | 0.920876 | 0.021623 |
| ZNF585B  | 0.902444 | 0.656227 | 1.24104  | 0.527728 |
| CEBPA    | 0.92801  | 0.76902  | 1.11987  | 0.435852 |
| SNHG6    | 1.317166 | 0.939977 | 1.845712 | 0.109517 |
| DNM1P35  | 1.226059 | 0.828282 | 1.814866 | 0.308454 |
| PGAM5    | 1.096221 | 0.734075 | 1.637027 | 0.653423 |
| SNHG10   | 1.073036 | 0.652568 | 1.764424 | 0.78116  |
| ZCCHC3   | 1.336649 | 0.804987 | 2.219451 | 0.262069 |
| TWF2     | 1.81575  | 1.266212 | 2.603788 | 0.001181 |
| MARS2    | 1.239245 | 0.883072 | 1.739074 | 0.214712 |
| USP51    | 0.990741 | 0.727412 | 1.349397 | 0.952943 |
| BCKDHA   | 1.229173 | 0.682585 | 2.213447 | 0.491738 |
| INSL3    | 0.880413 | 0.684726 | 1.132026 | 0.32068  |
| PCDHGB8I | 0.861732 | 0.63022  | 1.17829  | 0.351231 |
| POU5F2   | 0.677362 | 0.468774 | 0.978764 | 0.038055 |
| PCP4L1   | 1.08703  | 0.81446  | 1.450819 | 0.571004 |
| ABHD14A  | 1.272235 | 0.832692 | 1.943794 | 0.26556  |

|          |          |          |          |          |
|----------|----------|----------|----------|----------|
| ANP32C   | 1.151399 | 0.712226 | 1.861373 | 0.565127 |
| CCDC153  | 1.194419 | 0.768643 | 1.856046 | 0.429548 |
| ACTN3    | 0.716113 | 0.302967 | 1.692653 | 0.446766 |
| FMN1     | 1.261642 | 0.990658 | 1.60675  | 0.059581 |
| SNORA58  | 1.174824 | 0.904794 | 1.525442 | 0.22661  |
| HAUS5    | 1.274326 | 0.847571 | 1.915955 | 0.243975 |
| SLED1    | 1.070372 | 0.922914 | 1.24139  | 0.368528 |
| TMEM150  | 1.019738 | 0.77985  | 1.333418 | 0.886416 |
| NAIP     | 1.068874 | 0.89413  | 1.277769 | 0.464593 |
| ZNF324B  | 1.182903 | 0.69908  | 2.001571 | 0.531357 |
| ZNF564   | 0.564022 | 0.33518  | 0.949102 | 0.031029 |
| PVT1     | 0.866395 | 0.664676 | 1.129334 | 0.288902 |
| PDCD6    | 0.869427 | 0.577446 | 1.309045 | 0.502758 |
| TMEM158  | 1.103622 | 0.846857 | 1.438238 | 0.465555 |
| YJEFN3   | 0.861869 | 0.566815 | 1.310512 | 0.486907 |
| PTTG2    | 1.088933 | 0.825082 | 1.43716  | 0.5473   |
| ZNF718   | 0.967457 | 0.788376 | 1.187216 | 0.751408 |
| GYPB     | 0.9242   | 0.779876 | 1.095233 | 0.362869 |
| CHCHD10  | 1.818338 | 1.386225 | 2.38515  | 1.57E-05 |
| GPR162   | 1.065412 | 0.88838  | 1.277721 | 0.494353 |
| ATP6V1E2 | 1.157442 | 0.638658 | 2.097633 | 0.629837 |
| GLI4     | 1.010722 | 0.724274 | 1.41046  | 0.949984 |
| RNF138P1 | 0.918026 | 0.65809  | 1.280631 | 0.614552 |
| ZNF674   | 1.015572 | 0.594554 | 1.73472  | 0.954892 |
| ZNF345   | 0.702518 | 0.470969 | 1.047908 | 0.083523 |
| SHANK3   | 0.94547  | 0.844885 | 1.058029 | 0.328533 |
| ZNF550   | 0.804833 | 0.592192 | 1.093827 | 0.165429 |
| RPL32P3  | 0.997701 | 0.656738 | 1.515682 | 0.991391 |
| FOXD1    | 3.186874 | 1.340752 | 7.574978 | 0.008697 |
| MALAT1   | 0.746044 | 0.530047 | 1.050061 | 0.092982 |
| PRB1     | 1.063561 | 0.696708 | 1.623581 | 0.775247 |
| SCARNA8  | 0.818708 | 0.580658 | 1.154349 | 0.253821 |
| SCARNA6  | 0.815804 | 0.583168 | 1.141241 | 0.234594 |
| SCARNA23 | 0.89437  | 0.680938 | 1.174698 | 0.422257 |
| SNORD79  | 1.157673 | 0.957706 | 1.399394 | 0.130203 |
| SCARNA17 | 0.738228 | 0.583028 | 0.93474  | 0.011722 |
| SCARNA5  | 0.833247 | 0.620432 | 1.119061 | 0.22537  |
| SNORD27  | 0.876601 | 0.718164 | 1.069991 | 0.195371 |
| MIR2278  | 0.936098 | 0.749882 | 1.168557 | 0.559545 |
| RNY4     | 1.023473 | 0.761762 | 1.375095 | 0.877625 |
| SCARNA20 | 0.877722 | 0.686959 | 1.121459 | 0.296881 |
| MIR2276  | 0.95247  | 0.798844 | 1.13564  | 0.58739  |
| SCARNA14 | 0.990317 | 0.767946 | 1.277078 | 0.940219 |
| SCARNA22 | 1.270889 | 1.006334 | 1.604992 | 0.044116 |
| SCARNA3  | 0.944012 | 0.702907 | 1.267819 | 0.701787 |
| SCARNA1  | 0.849144 | 0.639688 | 1.127183 | 0.257828 |
| MIR2116  | 1.1459   | 0.954543 | 1.375618 | 0.144039 |
| PCDHGA1  | 0.86318  | 0.633204 | 1.176681 | 0.351984 |
| HOXA10   | 1.227625 | 1.096765 | 1.374099 | 0.000362 |
| TMEM200  | 0.581755 | 0.274671 | 1.232161 | 0.157146 |
| PCDHGB6  | 0.871289 | 0.615933 | 1.232513 | 0.436217 |
| SERPINE3 | 1.140376 | 0.690936 | 1.882169 | 0.607378 |
| TUG1     | 0.914636 | 0.580553 | 1.440969 | 0.700424 |
| TRNP1    | 1.482959 | 1.170579 | 1.8787   | 0.001095 |
| PCDHGA5  | 1.025514 | 0.730802 | 1.439075 | 0.884124 |
| NACA2    | 0.943703 | 0.671837 | 1.325581 | 0.738209 |
| PCDHGA7  | 1.020573 | 0.733113 | 1.42075  | 0.903968 |
| RNF5P1   | 1.022924 | 0.778521 | 1.344052 | 0.870751 |

|          |          |          |          |          |
|----------|----------|----------|----------|----------|
| SLC10A5  | 0.898445 | 0.712359 | 1.133141 | 0.365793 |
| EIF5AL1  | 1.724722 | 0.940838 | 3.161721 | 0.077944 |
| ALG11    | 0.745111 | 0.459228 | 1.208965 | 0.233462 |
| PRKDC    | 1.100599 | 0.792719 | 1.528056 | 0.566961 |
| PCDHGA6  | 0.991885 | 0.743189 | 1.323804 | 0.95588  |
| PCDHGA8  | 1.103923 | 0.715567 | 1.70305  | 0.654899 |
| PCDHGA1  | 0.802521 | 0.564612 | 1.140679 | 0.220093 |
| PCDHGA1  | 0.869912 | 0.656978 | 1.15186  | 0.330579 |
| PCDHGB2  | 1.081476 | 0.900831 | 1.298346 | 0.40092  |
| PCDHGB4  | 0.905952 | 0.59983  | 1.368301 | 0.638727 |
| CLDN23   | 1.212264 | 0.878628 | 1.672589 | 0.241165 |
| ZNF260   | 0.940645 | 0.683208 | 1.295086 | 0.707623 |
| LYN      | 1.529731 | 1.158966 | 2.019107 | 0.002685 |
| PINX1    | 2.293931 | 1.178917 | 4.463522 | 0.014502 |
| PCDHGB7  | 0.886782 | 0.667829 | 1.177521 | 0.40626  |
| SIGLEC14 | 1.084274 | 0.930049 | 1.264072 | 0.301329 |
| CHMP4A   | 0.789461 | 0.426131 | 1.462572 | 0.452382 |
| SIGLEC12 | 1.14786  | 1.010635 | 1.303718 | 0.033769 |
| FLJ20021 | 1.165702 | 0.83762  | 1.622287 | 0.363237 |
| PABPC4L  | 0.635018 | 0.416033 | 0.969271 | 0.035325 |
| OMP      | 0.709704 | 0.406433 | 1.239268 | 0.227936 |
| FPGT     | 0.931249 | 0.618623 | 1.401863 | 0.732871 |
| MEX3A    | 0.805466 | 0.660243 | 0.982631 | 0.03295  |
| SLC22A18 | 1.869914 | 1.199812 | 2.914274 | 0.005699 |
| MPV17L2  | 1.989481 | 1.321391 | 2.995353 | 0.000985 |
| SCARNA9  | 0.844358 | 0.620964 | 1.148118 | 0.280582 |
| DPP3     | 1.948141 | 1.255208 | 3.023605 | 0.002945 |
| ANKHD1-I | 0.773989 | 0.47804  | 1.253156 | 0.297376 |
| KRTAP5-9 | 1.124416 | 0.82583  | 1.530959 | 0.456461 |
| CHMP1B   | 0.990956 | 0.582795 | 1.684973 | 0.973241 |
| EID3     | 0.727499 | 0.525556 | 1.007037 | 0.05515  |
| SNHG9    | 1.29882  | 1.009604 | 1.670887 | 0.041918 |
| CARD17   | 1.177808 | 0.978457 | 1.417776 | 0.083671 |
| EID1     | 1.855686 | 1.10917  | 3.104636 | 0.018545 |
| TAS2R43  | 0.798846 | 0.666012 | 0.958174 | 0.015502 |
| LY6G6E   | 1.344934 | 1.073282 | 1.685342 | 0.010044 |
| FDXACB1  | 1.243126 | 0.707652 | 2.183786 | 0.449021 |
| SNHG1    | 1.126636 | 0.720414 | 1.761915 | 0.601237 |
| TIFAB    | 1.102131 | 0.964649 | 1.259207 | 0.152567 |
| CYP2A6   | 0.776715 | 0.494597 | 1.219753 | 0.272508 |
| CTSO     | 1.05333  | 0.761359 | 1.457269 | 0.753738 |
| ZNF432   | 0.767027 | 0.51216  | 1.148725 | 0.198055 |
| TAS2R30  | 0.779691 | 0.613371 | 0.991108 | 0.04206  |
| ZNF10    | 0.803546 | 0.598034 | 1.079681 | 0.146705 |
| ZNF486   | 0.758614 | 0.602275 | 0.955536 | 0.018964 |
| HMBS     | 0.939041 | 0.74907  | 1.17719  | 0.585479 |
| ZNF225   | 0.760064 | 0.501905 | 1.151007 | 0.195063 |
| TAS2R31  | 0.592666 | 0.428808 | 0.819138 | 0.001534 |
| POLG2    | 0.402521 | 0.233269 | 0.694578 | 0.001078 |
| CLEC12B  | 1.039697 | 0.83375  | 1.296516 | 0.729613 |
| ZNF350   | 0.730909 | 0.427832 | 1.248686 | 0.251306 |
| ZNF253   | 0.739512 | 0.562344 | 0.972497 | 0.030808 |
| CAPNS2   | 0.716677 | 0.53986  | 0.951407 | 0.021191 |
| HP       | 0.993271 | 0.835844 | 1.180348 | 0.93887  |
| LSM14A   | 1.14208  | 0.612864 | 2.128284 | 0.675719 |
| NHLRC4   | 1.105364 | 0.805311 | 1.517214 | 0.535291 |
| GATC     | 0.845314 | 0.45277  | 1.578187 | 0.597806 |
| MGAM     | 0.923989 | 0.788718 | 1.082459 | 0.327644 |



|          |          |          |          |          |
|----------|----------|----------|----------|----------|
| FNTB     | 0.626284 | 0.369393 | 1.06183  | 0.082345 |
| ZNF878   | 0.655169 | 0.463874 | 0.925351 | 0.016379 |
| CNPY2    | 0.911817 | 0.526392 | 1.579452 | 0.741901 |
| MRS2P2   | 0.961708 | 0.652103 | 1.418308 | 0.84385  |
| CUX1     | 0.491356 | 0.303884 | 0.794483 | 0.003751 |
| MAP1LC3B | 1.071478 | 0.790912 | 1.451572 | 0.655824 |
| CLEC5A   | 0.87782  | 0.786539 | 0.979695 | 0.020011 |
| CHURC1   | 1.105733 | 0.767366 | 1.5933   | 0.589705 |
| RTKL1    | 1.078798 | 0.564898 | 2.060203 | 0.818262 |
| PDF      | 1.307632 | 0.854996 | 1.999892 | 0.215977 |
| SPESP1   | 1.021552 | 0.806709 | 1.293612 | 0.859509 |
| MC1R     | 0.843159 | 0.589339 | 1.206296 | 0.350515 |
| TUBB3    | 0.646728 | 0.194115 | 2.154689 | 0.477837 |
| ITGB3    | 1.15994  | 1.027954 | 1.308872 | 0.016071 |
| THTPA    | 1.28652  | 0.767648 | 2.15611  | 0.338925 |
| MRPL46   | 1.076371 | 0.418758 | 2.766694 | 0.878562 |
| TYRO3P   | 0.839779 | 0.586897 | 1.201624 | 0.339473 |
| RBM15B   | 1.076346 | 0.650572 | 1.780771 | 0.774567 |
| HOXB7    | 1.255354 | 1.077059 | 1.463163 | 0.003617 |
| MRC1     | 1.194289 | 1.070876 | 1.331924 | 0.001421 |
| HSPB9    | 0.994098 | 0.684328 | 1.44409  | 0.975213 |
| MT1L     | 0.988396 | 0.786187 | 1.242614 | 0.920386 |
| CCPG1    | 0.928654 | 0.611393 | 1.410544 | 0.728536 |
| EPPK1    | 0.986866 | 0.517985 | 1.880181 | 0.967934 |
| BOP1     | 1.38122  | 0.982283 | 1.942179 | 0.063287 |
| FIGNL2   | 1.904157 | 0.965432 | 3.755642 | 0.063105 |
| PECAM1   | 1.331819 | 1.092955 | 1.622888 | 0.004493 |
| UBE2MP1  | 1.394252 | 0.857112 | 2.268011 | 0.180619 |
| GAN      | 0.881244 | 0.531901 | 1.460031 | 0.623588 |
| HPR      | 0.892204 | 0.527327 | 1.509553 | 0.670755 |
| PCDHGA9  | 0.848298 | 0.599376 | 1.2006   | 0.353223 |
| PCDHGB3  | 0.999565 | 0.771859 | 1.294446 | 0.997365 |
| CORO7    | 1.726431 | 1.158381 | 2.573043 | 0.007316 |
| SPON1    | 1.156023 | 1.016786 | 1.314326 | 0.026815 |
| MRPL12   | 1.466023 | 1.000478 | 2.148195 | 0.049714 |
| ALOX12P2 | 0.873886 | 0.751079 | 1.016773 | 0.081039 |
| GTF2I    | 0.649415 | 0.409295 | 1.030405 | 0.066833 |
| ZNF234   | 0.664287 | 0.453665 | 0.972694 | 0.035531 |
| IKBKE    | 1.127818 | 0.786588 | 1.617077 | 0.512944 |
| SNORD43  | 1.096374 | 0.744358 | 1.614862 | 0.641441 |
| SNORD3A  | 1.001726 | 0.830502 | 1.208249 | 0.985617 |
| NBPF11   | 0.782066 | 0.509756 | 1.199844 | 0.26031  |
| RNU4ATA1 | 0.822749 | 0.63719  | 1.062346 | 0.134608 |
| DYNLL2   | 1.061216 | 0.583222 | 1.930959 | 0.845754 |
| OTUD7B   | 0.736792 | 0.515725 | 1.052619 | 0.093306 |
| DPRXP4   | 0.843848 | 0.604889 | 1.177207 | 0.317541 |
| SNORD3C  | 0.908988 | 0.563077 | 1.4674   | 0.696153 |
| SNORD92  | 0.881572 | 0.731519 | 1.062406 | 0.185481 |
| SNORD53  | 0.949449 | 0.759589 | 1.186766 | 0.648605 |
| ANXA8    | 0.753925 | 0.584755 | 0.972035 | 0.029351 |
| RBM8A    | 1.189369 | 0.665249 | 2.126422 | 0.558539 |
| ARGFXP2  | 0.796582 | 0.526454 | 1.205316 | 0.281818 |
| TIMM23   | 1.106517 | 0.65982  | 1.855627 | 0.701191 |
| RNF115   | 0.533801 | 0.282559 | 1.008439 | 0.053104 |
| RPL17    | 0.747926 | 0.431839 | 1.295376 | 0.299991 |
| SEC22B   | 0.908256 | 0.493679 | 1.670985 | 0.75704  |
| FSBP     | 0.728166 | 0.438162 | 1.210114 | 0.220928 |
| TXNIP    | 1.22925  | 0.926621 | 1.630714 | 0.152305 |

|          |          |          |          |           |
|----------|----------|----------|----------|-----------|
| SRGAP2   | 1.366888 | 1.060375 | 1.762    | 0.015845  |
| BAHCC1   | 0.941661 | 0.818836 | 1.08291  | 0.399254  |
| RASSF5   | 1.336651 | 0.935329 | 1.910168 | 0.111174  |
| STRADA   | 0.656879 | 0.422257 | 1.021865 | 0.062318  |
| MIR744   | 0.857375 | 0.658882 | 1.115666 | 0.252077  |
| NBPF15   | 1.022016 | 0.740916 | 1.409764 | 0.894431  |
| NCOA4    | 0.662148 | 0.450735 | 0.972722 | 0.03565   |
| MRPS21   | 1.834946 | 1.069973 | 3.146836 | 0.027403  |
| GDF10    | 0.74506  | 0.481914 | 1.151896 | 0.185555  |
| MYO15B   | 0.964697 | 0.720592 | 1.291493 | 0.809198  |
| AARSD1   | 0.676278 | 0.396959 | 1.15214  | 0.15016   |
| MIR212   | 0.790526 | 0.56188  | 1.112216 | 0.177206  |
| MIR132   | 0.888423 | 0.614853 | 1.283713 | 0.528699  |
| LCN6     | 1.163537 | 0.95426  | 1.41871  | 0.134348  |
| S1PR2    | 1.021405 | 0.717104 | 1.454834 | 0.906579  |
| ZNF224   | 0.597426 | 0.393773 | 0.906405 | 0.015435  |
| LIN37    | 1.078268 | 0.573535 | 2.027187 | 0.815019  |
| NDUFA7   | 0.689564 | 0.413346 | 1.150364 | 0.154592  |
| NBPF12   | 1.157555 | 0.769702 | 1.740846 | 0.482217  |
| CLEC4GP1 | 0.824236 | 0.263768 | 2.575615 | 0.739504  |
| CT45A1   | 1.165448 | 0.965399 | 1.406951 | 0.1111054 |
| MAGIX    | 1.296808 | 0.720649 | 2.333605 | 0.385909  |
| IKBK     | 1.177764 | 0.897253 | 1.545971 | 0.238463  |
| SPIB     | 1.105877 | 0.914008 | 1.338024 | 0.30061   |
| TMEM185  | 0.943235 | 0.540305 | 1.646649 | 0.837128  |
| NBPF9    | 1.117425 | 0.756411 | 1.65074  | 0.577056  |
| KCNQ1OT  | 0.757832 | 0.60123  | 0.955225 | 0.018883  |
| EGLN2    | 0.543563 | 0.317929 | 0.929327 | 0.025893  |
| SNHG8    | 1.072267 | 0.779119 | 1.475713 | 0.668496  |
| TERC     | 0.64962  | 0.186534 | 2.262354 | 0.498039  |
| NBPF8    | 0.842904 | 0.669338 | 1.061479 | 0.146283  |
| NBPF14   | 1.42934  | 0.992055 | 2.059373 | 0.055218  |
| TAF15    | 1.309266 | 0.80267  | 2.135593 | 0.280393  |
| RASL10B  | 1.0339   | 0.772744 | 1.383317 | 0.822422  |
| SRXN1    | 1.931548 | 0.930916 | 4.007751 | 0.077105  |
| NBPF10   | 1.210681 | 0.799781 | 1.832689 | 0.366107  |
| MMP28    | 1.027422 | 0.859372 | 1.228336 | 0.766565  |
| CCL5     | 1.363831 | 1.111752 | 1.673067 | 0.002921  |
| LIX1L    | 0.801156 | 0.471237 | 1.362056 | 0.412911  |
| SNORD111 | 0.955649 | 0.723636 | 1.262049 | 0.749184  |
| MIR98    | 0.95628  | 0.704274 | 1.29846  | 0.774538  |
| ANKRD34  | 0.97767  | 0.901511 | 1.060263 | 0.585227  |
| SNORD14  | 1.208346 | 0.833164 | 1.752475 | 0.318418  |
| MIR139   | 2.861104 | 1.536546 | 5.327479 | 0.000919  |
| GTF2H5   | 0.937377 | 0.524048 | 1.676709 | 0.827453  |
| NUDT3    | 1.458573 | 0.820969 | 2.59137  | 0.198015  |
| POM121C  | 0.768293 | 0.448273 | 1.316773 | 0.337618  |
| CD24     | 1.05029  | 0.934761 | 1.180099 | 0.409221  |
| SNORA28  | 0.740176 | 0.538741 | 1.016928 | 0.063398  |
| ZNF595   | 0.960089 | 0.836726 | 1.10164  | 0.561611  |
| DOC2B    | 0.72496  | 0.596195 | 0.881535 | 0.001265  |
| MESTIT1  | 0.680117 | 0.447308 | 1.034096 | 0.071366  |
| DCP1A    | 0.874792 | 0.445036 | 1.719549 | 0.698059  |
| FAM106A  | 0.982557 | 0.819165 | 1.178539 | 0.849595  |
| SNURF    | 0.999581 | 0.794996 | 1.256815 | 0.99714   |
| DGCR11   | 0.823189 | 0.554091 | 1.222975 | 0.33537   |
| ZNHIT3   | 0.661605 | 0.344505 | 1.270579 | 0.214714  |
| CYFIP1   | 1.103154 | 0.841744 | 1.445747 | 0.476798  |

|          |          |          |          |          |
|----------|----------|----------|----------|----------|
| USP27X   | 1.499537 | 1.08025  | 2.081567 | 0.015466 |
| TAF9     | 1.027973 | 0.59255  | 1.783357 | 0.921811 |
| NOL12    | 0.943734 | 0.594196 | 1.49889  | 0.806192 |
| ANTXRL   | 1.312628 | 0.789366 | 2.182755 | 0.294453 |
| SOCS7    | 0.568887 | 0.350371 | 0.923685 | 0.02255  |
| ADRA2B   | 1.831238 | 1.136906 | 2.949612 | 0.012863 |
| ZNF658   | 1.313557 | 0.840789 | 2.052157 | 0.230859 |
| SEBOX    | 1.474808 | 0.723084 | 3.008027 | 0.285346 |
| PI4KAP1  | 0.975378 | 0.783957 | 1.213538 | 0.823025 |
| CCL23    | 1.195302 | 1.074807 | 1.329305 | 0.001    |
| RNU11    | 0.904259 | 0.632425 | 1.292937 | 0.581182 |
| ZNF280B  | 0.942734 | 0.661353 | 1.343832 | 0.744391 |
| MLLT6    | 1.075777 | 0.761668 | 1.519423 | 0.678423 |
| NUDT18   | 1.236787 | 0.850074 | 1.799424 | 0.266618 |
| SNORD91I | 0.795978 | 0.590254 | 1.073403 | 0.134739 |
| ZNF2     | 1.129416 | 0.731217 | 1.744462 | 0.583236 |
| LENG9    | 1.181448 | 0.809373 | 1.724567 | 0.387573 |
| CCL4     | 1.227532 | 0.988494 | 1.524375 | 0.063563 |
| MIR1299  | 1.035947 | 0.898259 | 1.19474  | 0.627424 |
| CCL18    | 1.099791 | 0.879929 | 1.374588 | 0.403217 |
| FCGBP    | 0.96864  | 0.753824 | 1.244671 | 0.80331  |
| XKR5     | 0.791387 | 0.568999 | 1.100695 | 0.164534 |
| MT1IP    | 0.941801 | 0.184284 | 4.813171 | 0.942569 |
| AATF     | 1.180785 | 0.69232  | 2.013884 | 0.541818 |
| ARHGAP2I | 0.851827 | 0.660543 | 1.098505 | 0.216488 |
| TUBGCP5  | 0.917529 | 0.597758 | 1.408361 | 0.693808 |
| PRSS2    | 1.241168 | 1.078755 | 1.428034 | 0.002533 |
| DUSP14   | 1.11051  | 0.827753 | 1.489856 | 0.484478 |
| UHRF1    | 0.843644 | 0.641537 | 1.109423 | 0.223676 |
| ORAI1    | 1.01259  | 0.807389 | 1.269944 | 0.913771 |
| CCL4L2   | 1.255141 | 0.991267 | 1.589258 | 0.059143 |
| CCL3L3   | 1.185789 | 1.005451 | 1.398473 | 0.042914 |
| RN7SL1   | 1.025511 | 0.842647 | 1.248059 | 0.801509 |
| PIK3R6   | 1.053216 | 0.839323 | 1.321618 | 0.654402 |
| TADA2A   | 0.735781 | 0.456628 | 1.18559  | 0.207471 |
| PIP4K2B  | 0.798762 | 0.471436 | 1.353356 | 0.4036   |
| PCDHGB5  | 0.936387 | 0.690154 | 1.27047  | 0.672872 |
| HERC2P2  | 1.09138  | 0.853961 | 1.394808 | 0.484777 |
| RAB7B    | 0.821708 | 0.723614 | 0.9331   | 0.002466 |
| DACH1    | 1.047511 | 0.920022 | 1.192665 | 0.483288 |
| PADI6    | 1.770662 | 1.143642 | 2.741457 | 0.010415 |
| GTF2IP1  | 0.333301 | 0.159249 | 0.697584 | 0.003549 |
| STAG3L2  | 0.626344 | 0.467633 | 0.838921 | 0.001701 |
| TYW1B    | 0.547507 | 0.34151  | 0.877763 | 0.012372 |
| F8A3     | 0.804751 | 0.399873 | 1.619574 | 0.542694 |
| PIGW     | 1.09381  | 0.673093 | 1.777495 | 0.717384 |
| F8A1     | 1.112092 | 0.812195 | 1.522722 | 0.507577 |
| PCGF2    | 1.017874 | 0.71062  | 1.457977 | 0.923017 |
| MARCKS   | 1.142777 | 0.999366 | 1.306769 | 0.051094 |
| ZNF670   | 0.65998  | 0.44537  | 0.978003 | 0.038377 |
| PKD1L3   | 1.350509 | 0.815361 | 2.236892 | 0.243164 |
| CCL3     | 1.553916 | 1.211657 | 1.992853 | 0.000516 |
| PGM5P2   | 0.843581 | 0.602351 | 1.181418 | 0.322258 |
| PSMB3    | 1.570606 | 0.992124 | 2.486386 | 0.054076 |
| CISD3    | 2.026552 | 1.331461 | 3.084517 | 0.000982 |
| RDM1     | 1.587681 | 1.065962 | 2.364747 | 0.022953 |
| DDX52    | 0.732503 | 0.466267 | 1.150759 | 0.176799 |
| ZNF8     | 0.768007 | 0.53443  | 1.103672 | 0.153647 |

|          |          |          |          |          |
|----------|----------|----------|----------|----------|
| SSTR3    | 1.605018 | 0.994505 | 2.590318 | 0.052697 |
| MYO19    | 0.949229 | 0.624926 | 1.441828 | 0.806994 |
| GGNBP2   | 0.794128 | 0.48664  | 1.295905 | 0.35624  |
| ZNF229   | 1.300213 | 1.043302 | 1.620388 | 0.019419 |
| DHRS11   | 0.767117 | 0.581305 | 1.012322 | 0.06101  |
| ACACA    | 0.999867 | 0.690398 | 1.448054 | 0.999437 |
| TMEM191  | 1.250987 | 0.706212 | 2.216004 | 0.442716 |
| NR2E3    | 0.608555 | 0.340439 | 1.087827 | 0.093756 |
| MRM1     | 1.242838 | 0.851401 | 1.814241 | 0.259987 |
| MRPL45   | 0.797616 | 0.529449 | 1.20161  | 0.279459 |
| OR2L8    | 0.930488 | 0.675993 | 1.280794 | 0.658541 |
| FLJ42393 | 1.058422 | 0.752371 | 1.488968 | 0.744382 |
| TMEM75   | 0.757121 | 0.602836 | 0.950891 | 0.016708 |
| PLAC4    | 0.874818 | 0.637061 | 1.201308 | 0.408522 |
| SNHG4    | 1.149052 | 0.876473 | 1.506401 | 0.314592 |
| HSP90AB4 | 1.17167  | 0.78141  | 1.756837 | 0.44335  |
| WASH5P   | 0.927734 | 0.616545 | 1.395989 | 0.719    |
| ADORA3   | 1.325772 | 1.014301 | 1.732889 | 0.039028 |
| HYMAI    | 0.765575 | 0.56096  | 1.044826 | 0.09226  |
| MIR1322  | 1.001481 | 0.827484 | 1.212064 | 0.987877 |
| MIR1910  | 0.913128 | 0.786151 | 1.060613 | 0.234189 |
| SNORD98  | 0.855958 | 0.70794  | 1.034924 | 0.108363 |
| MIR924   | 1.051629 | 0.884572 | 1.250236 | 0.56844  |
| EXOC3L2  | 0.781722 | 0.621515 | 0.983227 | 0.035333 |
| MIR555   | 0.904835 | 0.714169 | 1.146404 | 0.407504 |
| MIR130B  | 1.21876  | 0.732041 | 2.029088 | 0.446861 |
| MIR628   | 1.034517 | 0.842699 | 1.269996 | 0.745699 |
| MIR1281  | 1.146162 | 0.919702 | 1.428384 | 0.224496 |
| MIR29A   | 0.958563 | 0.66809  | 1.375326 | 0.818277 |
| SCO2     | 1.269815 | 0.979348 | 1.646434 | 0.071468 |
| MIR718   | 1.296525 | 1.021821 | 1.645079 | 0.032545 |
| TBCE     | 0.745038 | 0.385225 | 1.440927 | 0.381821 |
| ARHGAP1  | 0.75544  | 0.484981 | 1.176726 | 0.214872 |
| TOP1P1   | 0.861895 | 0.581074 | 1.278432 | 0.460003 |
| NPBWR1   | 1.173107 | 0.762594 | 1.804604 | 0.467494 |
